# Supplementary material
Source: publisher figshare collection journal article supplement (https://diabetesjournals.figshare.com/articles/dataset/_/12794957)
Supplement: Supplementary file 2 [file 1]

## Checklist for Reporting Human Islet Preparations Used in Research

|                                                                                                                                                                                                                                                                             |                                          |
|-----------------------------------------------------------------------------------------------------------------------------------------------------------------------------------------------------------------------------------------------------------------------------|------------------------------------------|
| <b>Manuscript DOI:</b> DB20-0204                                                                                                                                                                                                                                            |                                          |
| <b>Title:</b> Epigenetic changes in Langerhans islets preceding the onset of diabetes                                                                                                                                                                                       |                                          |
| <b>Author list:</b> Meriem Ouni, PhD, Sophie Saussenthaler, MSc*, Fabian Eichelmann, PhD*, Markus Jähnert, MSc, Clemens Wittenbecher PhD, Tina Rönn PhD, Lisa Zellner, MSc, Pascal Gottmann, PhD, Charlotte Ling, PhD, Matthias B. Schulze, DrPH and Annette Schürmann, PhD |                                          |
| <b>Corresponding author:</b> Prof. Dr. Annette Schürmann                                                                                                                                                                                                                    | <b>Email address:</b> schuermann@dife.de |

| Islet preparation              | 1      | 2    | 3    | 4    | 5    | 6    | 7    | 8 <sup>a</sup> |
|--------------------------------|--------|------|------|------|------|------|------|----------------|
| MANDATORY INFORMATION          |        |      |      |      |      |      |      |                |
| Unique identifier              | 33     | 34   | 35   | 36   | 37   | 38   | 39   | 40             |
| Donor age (years)              | 49     | 51   | 65   | 40   | 60   | 39   | 64   | 68             |
| Donor sex (M/F)                | Female | Male           |
| Donor BMI (kg/m <sup>2</sup> ) | 33.4   | 25   | 24.9 | 24.2 | 24.2 | 31   | 26   | 24.5           |

|                                                                             |                                                       |                                                       |                                                       |                                                       |                                                       |                                                       |                                                       |                                                       |
|-----------------------------------------------------------------------------|-------------------------------------------------------|-------------------------------------------------------|-------------------------------------------------------|-------------------------------------------------------|-------------------------------------------------------|-------------------------------------------------------|-------------------------------------------------------|-------------------------------------------------------|
| Donor HbA <sub>1c</sub> or other measure of blood glucose control           | 40                                                    | 36                                                    | 40                                                    | 36                                                    | 33                                                    | 39                                                    | 33                                                    | 36                                                    |
| Origin/source of islets <sup>b</sup>                                        | The Nordic Network For Clinical Islet Transplantation |
| Islet isolation centre                                                      | Uppsala                                               |
| Donor history of diabetes? Yes/No                                           | no                                                    | no                                                    | yes                                                   | no                                                    | no                                                    | no                                                    | no                                                    | no                                                    |
| <b>If Yes, complete the next two lines if this information is available</b> |                                                       |                                                       |                                                       |                                                       |                                                       |                                                       |                                                       |                                                       |
| Diabetes duration (years)                                                   |                                                       |                                                       |                                                       |                                                       |                                                       |                                                       |                                                       |                                                       |
| Glucose-lowering therapy at time of death <sup>c</sup>                      |                                                       |                                                       |                                                       |                                                       |                                                       |                                                       |                                                       |                                                       |

| RECOMMENDED INFORMATION |  |  |  |  |  |  |  |  |
|-------------------------|--|--|--|--|--|--|--|--|
| Donor cause of death    |  |  |  |  |  |  |  |  |
| Warm ischaemia time (h) |  |  |  |  |  |  |  |  |
| Cold ischaemia time (h) |  |  |  |  |  |  |  |  |

|                                                                                   |  |  |  |  |  |  |  |  |
|-----------------------------------------------------------------------------------|--|--|--|--|--|--|--|--|
| Estimated purity (%)                                                              |  |  |  |  |  |  |  |  |
| Estimated viability (%)                                                           |  |  |  |  |  |  |  |  |
| Total culture time (h) <sup>d</sup>                                               |  |  |  |  |  |  |  |  |
| Glucose-stimulated insulin secretion or other functional measurement <sup>e</sup> |  |  |  |  |  |  |  |  |
| Handpicked to purity?<br>Yes/No                                                   |  |  |  |  |  |  |  |  |
| Additional notes                                                                  |  |  |  |  |  |  |  |  |

<sup>a</sup>If you have used more than eight islet preparations, please complete additional forms as necessary

<sup>b</sup>For example, IIDP, ECIT, Alberta IsletCore

<sup>c</sup>Please specify the therapy/therapies

<sup>d</sup>Time of islet culture at the isolation centre, during shipment and at the receiving laboratory

<sup>e</sup>Please specify the test and the results
