# Supplementary material
Source: publisher figshare collection journal article supplement (https://diabetesjournals.figshare.com/articles/dataset/_/12794957)
Supplement: Supplementary file 4 [file 1]

## Checklist for Reporting Human Islet Preparations Used in Research

|                                                                                                                                                                                                                                                                             |                                          |
|-----------------------------------------------------------------------------------------------------------------------------------------------------------------------------------------------------------------------------------------------------------------------------|------------------------------------------|
| <b>Manuscript DOI:</b> <a href="https://doi.org/10.2337/[insert manuscript submission number]">https://doi.org/10.2337/[insert manuscript submission number]</a> (Example, <a href="https://doi.org/10.2337/db18-1234">https://doi.org/10.2337/db18-1234</a> )              |                                          |
| <b>Title:</b> Epigenetic changes in Langerhans islets preceding the onset of diabetes                                                                                                                                                                                       |                                          |
| <b>Author list:</b> Meriem Ouni, PhD, Sophie Saussenthaler, MSc*, Fabian Eichelmann, PhD*, Markus Jähnert, MSc, Clemens Wittenbecher PhD, Tina Rönn PhD, Lisa Zellner, MSc, Pascal Gottmann, PhD, Charlotte Ling, PhD, Matthias B. Schulze, DrPH and Annette Schürmann, PhD |                                          |
| <b>Corresponding author:</b> Prof. Dr. Annette Schürmann                                                                                                                                                                                                                    | <b>Email address:</b> schuermann@dife.de |

| Islet preparation              | 1      | 2    | 3      | 4      | 5    | 6      | 7    | 8 <sup>a</sup> |
|--------------------------------|--------|------|--------|--------|------|--------|------|----------------|
| MANDATORY INFORMATION          |        |      |        |        |      |        |      |                |
| Unique identifier              | 41     | 42   | 43     | 44     | 45   | 46     | 47   | 48             |
| Donor age (years)              | 52     | 62   | 55     | 58     | 65   | 52     | 69   | 62             |
| Donor sex (M/F)                | Female | Male | Female | Female | Male | Female | Male | Male           |
| Donor BMI (kg/m <sup>2</sup> ) | 25.4   | 35   | 28.5   | 25     | 27.8 | 27     | 24.7 | 20.1           |

|                                                                             |                                                       |                                                       |                                                       |                                                       |                                                       |                                                       |                                                       |                                                       |
|-----------------------------------------------------------------------------|-------------------------------------------------------|-------------------------------------------------------|-------------------------------------------------------|-------------------------------------------------------|-------------------------------------------------------|-------------------------------------------------------|-------------------------------------------------------|-------------------------------------------------------|
| Donor HbA <sub>1c</sub> or other measure of blood glucose control           | 38                                                    | 46                                                    | 42                                                    | 39                                                    | 55                                                    | 33                                                    | 40                                                    | 56                                                    |
| Origin/source of islets <sup>b</sup>                                        | The Nordic Network For Clinical Islet Transplantation |
| Islet isolation centre                                                      | Uppsala                                               |
| Donor history of diabetes? Yes/No                                           | no                                                    | yes                                                   | yes                                                   | no                                                    | yes                                                   | no                                                    | no                                                    | yes                                                   |
| <b>If Yes, complete the next two lines if this information is available</b> |                                                       |                                                       |                                                       |                                                       |                                                       |                                                       |                                                       |                                                       |
| Diabetes duration (years)                                                   |                                                       |                                                       |                                                       |                                                       |                                                       |                                                       |                                                       |                                                       |
| Glucose-lowering therapy at time of death <sup>c</sup>                      |                                                       |                                                       |                                                       |                                                       |                                                       |                                                       |                                                       |                                                       |

| RECOMMENDED INFORMATION |  |  |  |  |  |  |  |  |
|-------------------------|--|--|--|--|--|--|--|--|
| Donor cause of death    |  |  |  |  |  |  |  |  |
| Warm ischaemia time (h) |  |  |  |  |  |  |  |  |
| Cold ischaemia time (h) |  |  |  |  |  |  |  |  |

|                                                                                   |  |  |  |  |  |  |  |  |
|-----------------------------------------------------------------------------------|--|--|--|--|--|--|--|--|
| Estimated purity (%)                                                              |  |  |  |  |  |  |  |  |
| Estimated viability (%)                                                           |  |  |  |  |  |  |  |  |
| Total culture time (h) <sup>d</sup>                                               |  |  |  |  |  |  |  |  |
| Glucose-stimulated insulin secretion or other functional measurement <sup>e</sup> |  |  |  |  |  |  |  |  |
| Handpicked to purity?<br>Yes/No                                                   |  |  |  |  |  |  |  |  |
| Additional notes                                                                  |  |  |  |  |  |  |  |  |

<sup>a</sup>If you have used more than eight islet preparations, please complete additional forms as necessary

<sup>b</sup>For example, IIDP, ECIT, Alberta IsletCore

<sup>c</sup>Please specify the therapy/therapies

<sup>d</sup>Time of islet culture at the isolation centre, during shipment and at the receiving laboratory

<sup>e</sup>Please specify the test and the results
