# Supplementary material
Source: publisher figshare collection journal article supplement (https://diabetesjournals.figshare.com/articles/dataset/_/12794957)
Supplement: Supplementary file 7 [file 1]

## Supplementary data

### Supplementary figures

Figure S1: Diabetic NZO female mice exhibit a higher fat mass than non-diabetic mice. A: Study design. After weaning, animals received a SD. At 5 weeks of age, NZO female mice (n=70) were placed on the high-fat diet (HFD). B: Fat mass is significantly increased in diabetes prone animals at 8 and 10 weeks. Number of animals of diabetes prone (n=45) and diabetes resistant (n=25) mice. Data are presented as mean  $\pm$  SEM. Differences between the groups were calculated by two-way ANOVA with Bonferroni correction. \*p<0.05, \*\*p<0.01, \*\*\*p<0.001.

Figure S2: Immunostaining revealed comparable islet cell composition in DR and DP NZO female mice. (A) Representative confocal images of pancreatic sections from 10-week-old DR (upper panel) and DP (lower panel) mice stained for insulin (gray), glucagon (green), and somatostatin (magenta). Scale bars, 50  $\mu$ m. (B) Beta, alpha and delta cell composition per total islet cell number analysed from 8-10 islets per animal (n=3-4). Data are mean  $\pm$  SEM. Statistical analysis was performed using Student's t-test with Welch's correction.

Figure S3: Analysis of the DNA methylome of pancreatic islets of DP and DR NZO mice. (A-B) No global differences of DNA methylation was observed in islets of DP and DR mice. (C-E) Differences in DNA methylation patterns between DP and DR were more frequently, (C) within the 5'UTR, (D) the 1<sup>st</sup> exon and (E) the 1<sup>st</sup> intron. Distribution of significantly different CpG sites (DMC) in relation to genomic (F).

Figure S4: Gene location of CpG sites associated with incident T2D from conditional logistic regression.



**A**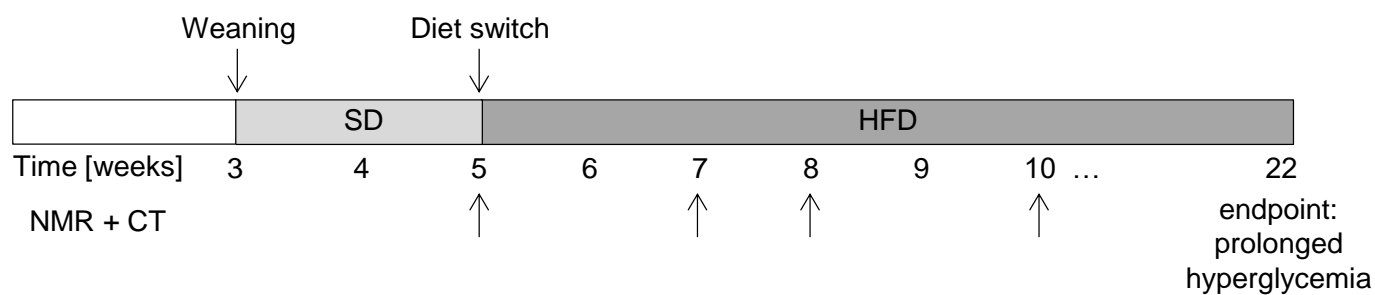**B**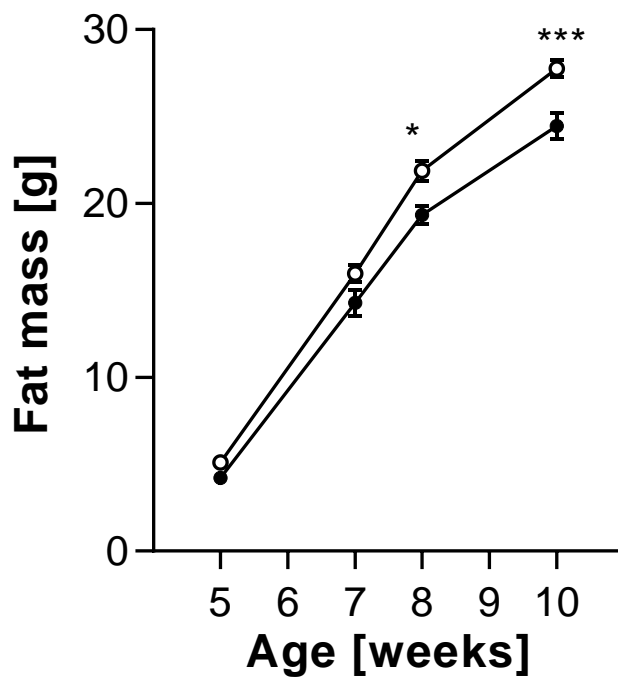



A

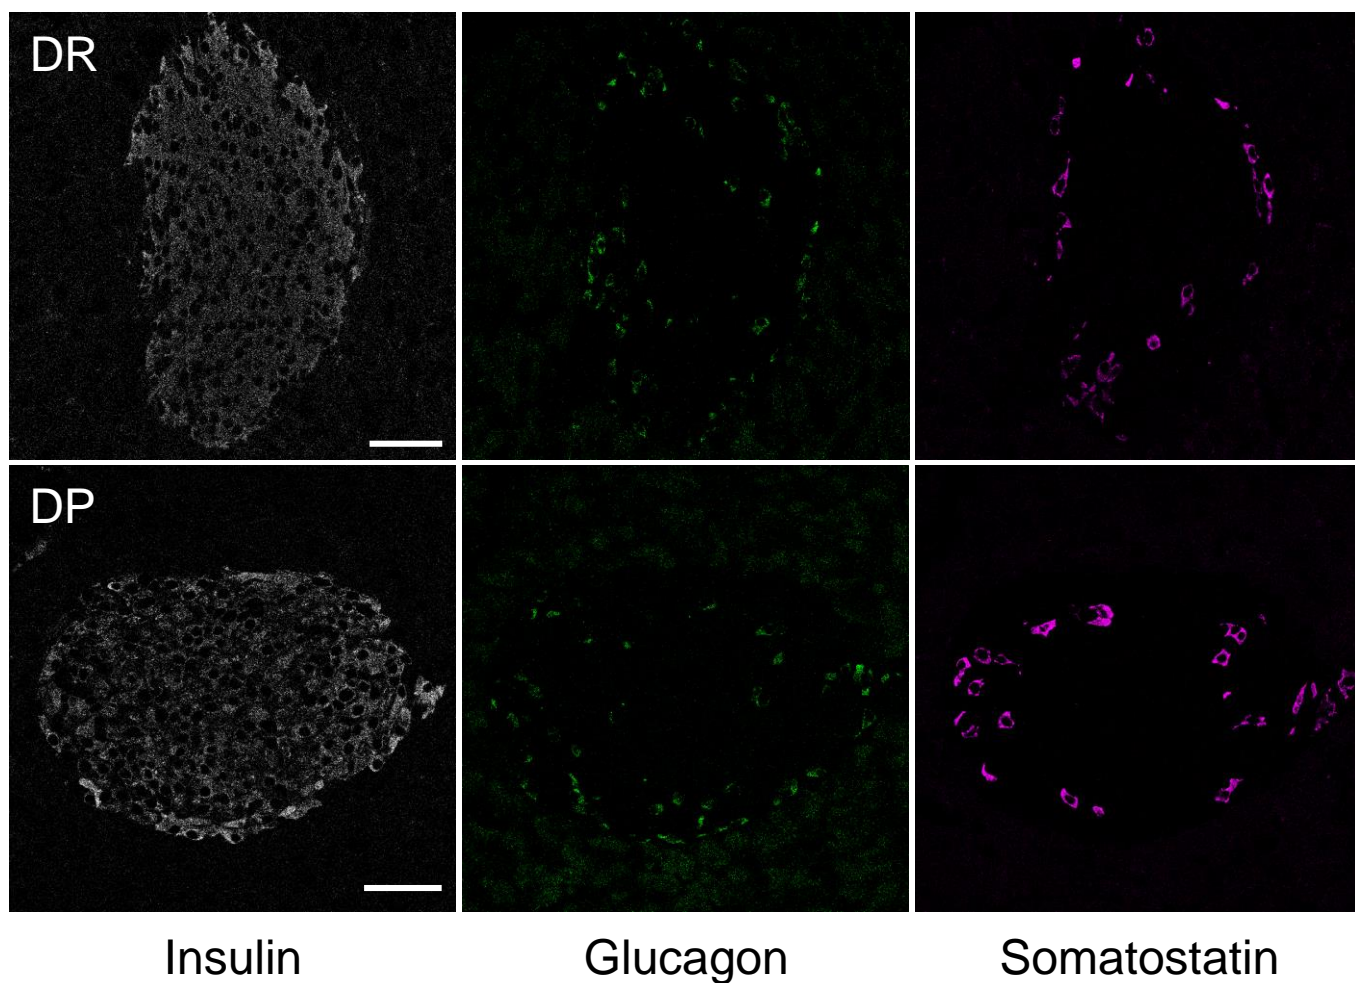

B

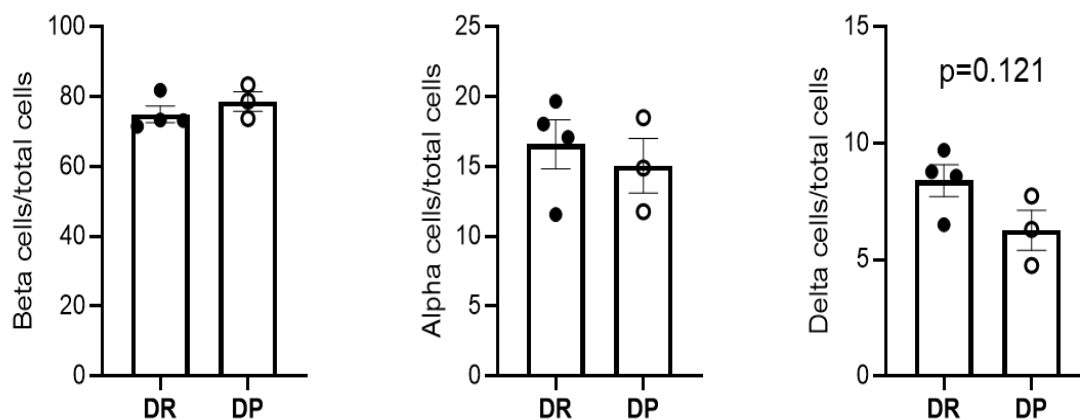

Supplemental figure 2



(A)

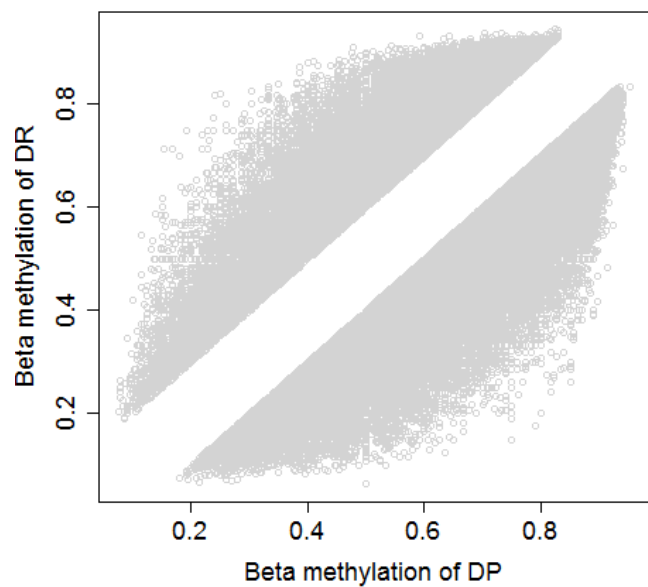

(B)

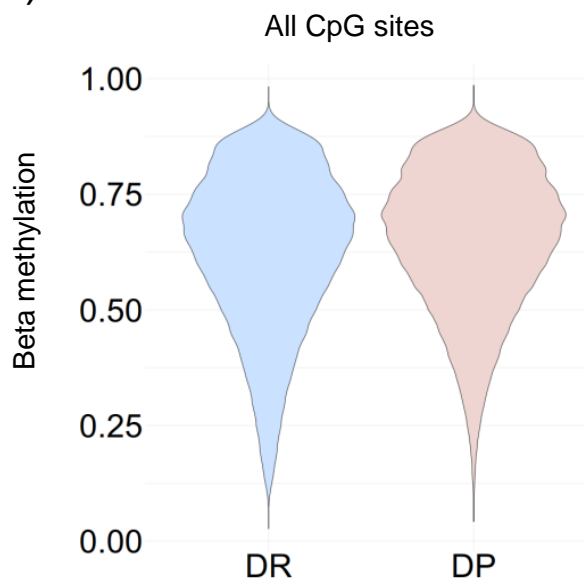

(C)

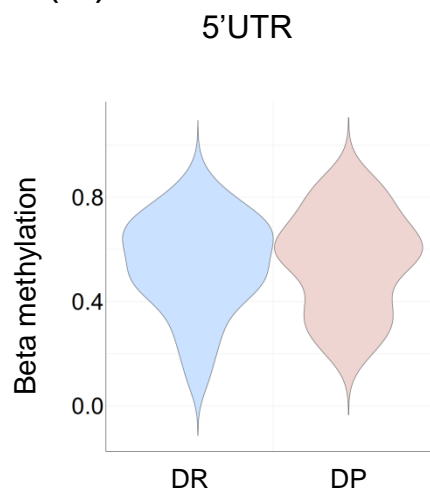

(D)

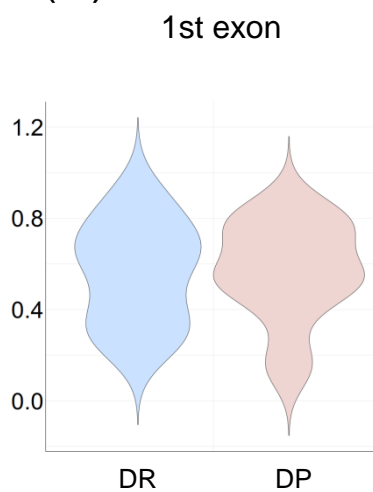

(E)

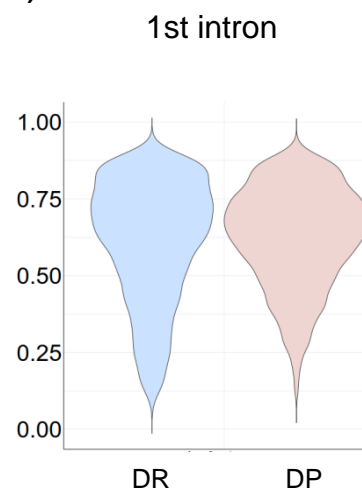



(F)

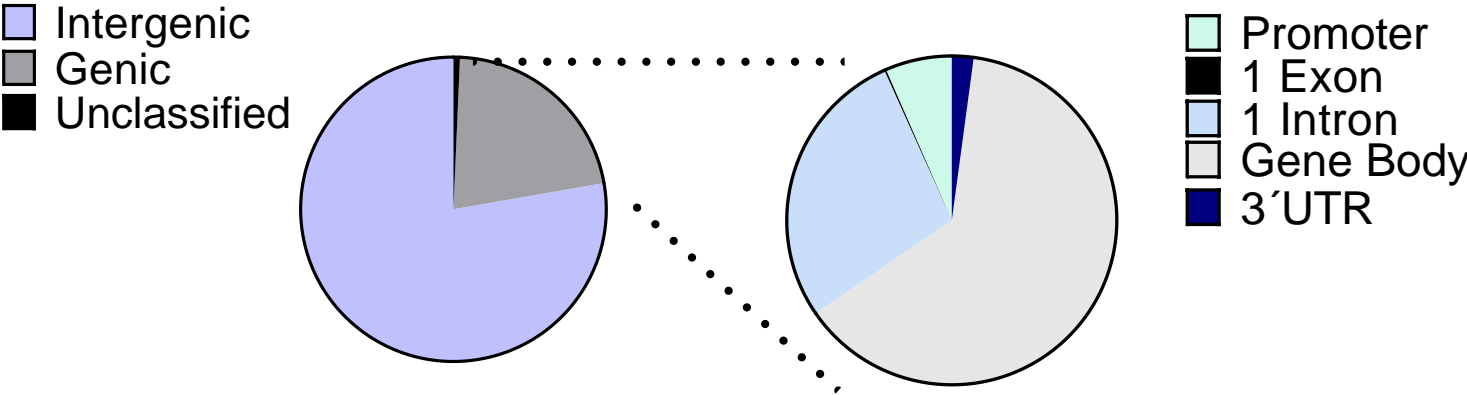



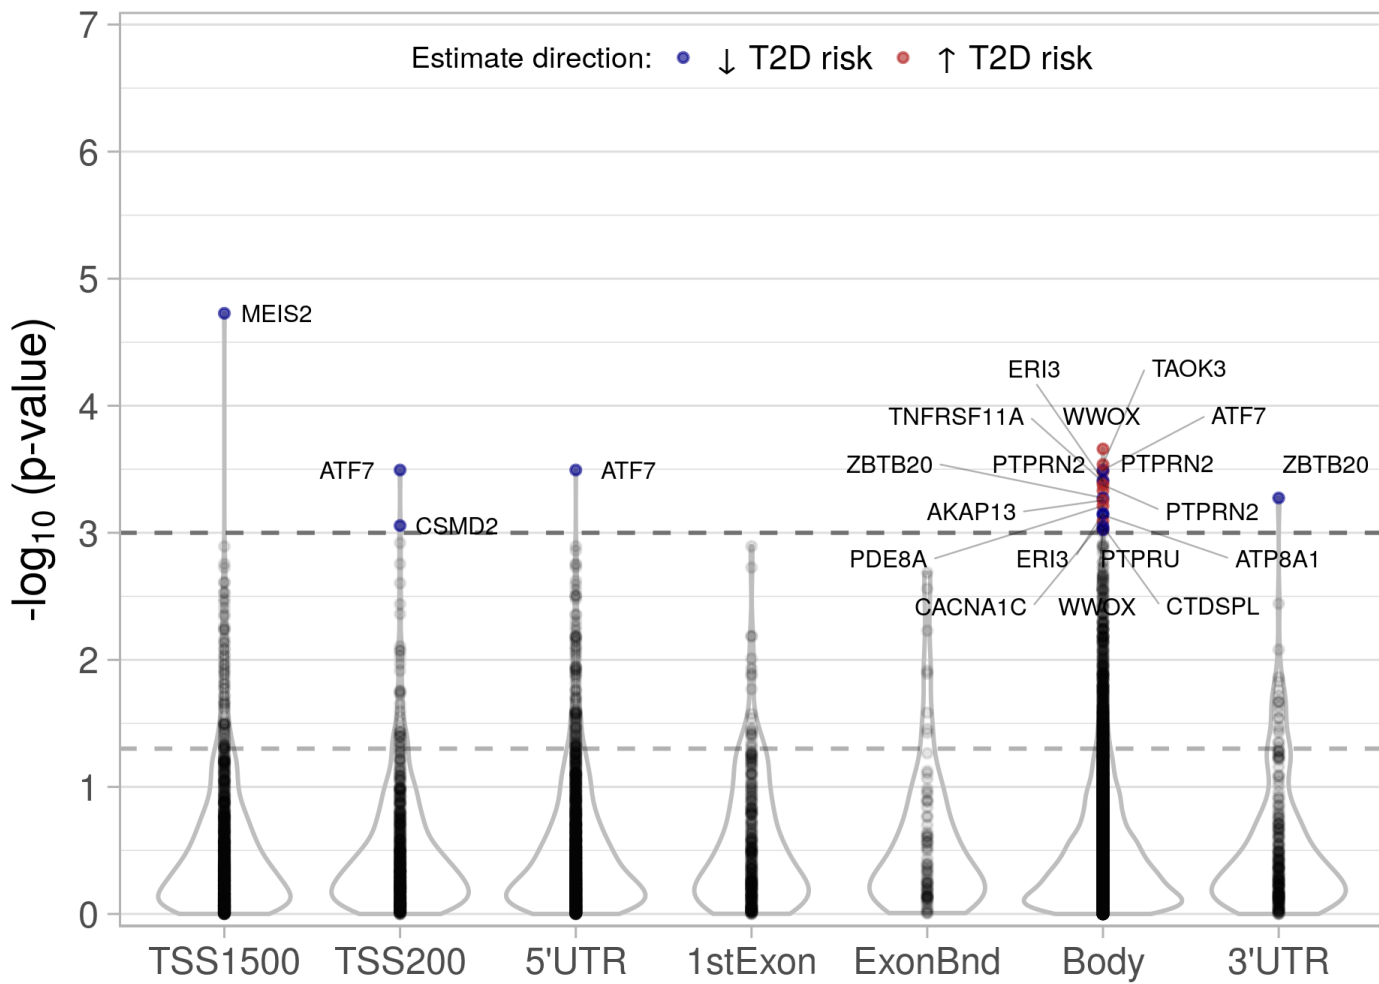

Supplemental figure 4



Supplementary Table S1: Method details

| Cohort                         | Mouse models                                                                                                                                                                                                  |                                                                                                                                                                                                                | Human transcriptome (Fadista <i>et al</i> , 2014)                                                                  | Human blood (EPIC-Potsdam)                                                                                 |                 | Human pancreas (LUND)                                                                                              |                 |
|--------------------------------|---------------------------------------------------------------------------------------------------------------------------------------------------------------------------------------------------------------|----------------------------------------------------------------------------------------------------------------------------------------------------------------------------------------------------------------|--------------------------------------------------------------------------------------------------------------------|------------------------------------------------------------------------------------------------------------|-----------------|--------------------------------------------------------------------------------------------------------------------|-----------------|
|                                | DP --> 5 individual pools, each pool contains islets from 5 mice<br>DR --> 5 individual pools, each pool contains islets from 5 mice<br>one pool correspond to 300 islets; total number of islets 1500 islets | DP --> 5 individual pools, each pool contains islets from 2-3 mice<br>DR --> 4 individual pools, each pool contains islets from 2 mice<br>one pool correspond to 180 islets; total number of islets 900 islets | n= 55 non-T2D and control n= 26 T2D samples originally from (Nordic islet transplantation programme, LUND)         | n= 270 matched case-control pairs                                                                          |                 | n=34 Con/15 T2D                                                                                                    |                 |
| Genome-wide analysis           | DNA methylation                                                                                                                                                                                               | Gene expression                                                                                                                                                                                                | Gene expression                                                                                                    | DNA methylation                                                                                            | Gene Expression | DNA methylation                                                                                                    | Gene Expression |
| Timing of sampling             | Islets isolated from animals at 10 weeks of age; <i>before T2D-like development</i>                                                                                                                           | Islets isolated from animals at 10 weeks of age; <i>before T2D-like development</i>                                                                                                                            | Islets isolated from <i>diagnosed T2D</i> and non-T2D controls persons --> classified with hb1Ac with cutoff of 6% | Blood cells collected prior T2D diagnosis with a median of 3.8 years. Informations according to physicians | Not performed   | Islets isolated from <i>diagnosed T2D</i> and non-T2D controls persons --> classified with hb1Ac with cutoff of 6% | Not performed   |
| Platforms                      | WGBS                                                                                                                                                                                                          | RNA seq                                                                                                                                                                                                        | RNA seq                                                                                                            | Array 850K                                                                                                 | Not performed   | Array 450K                                                                                                         | Not performed   |
| Bioinformatic analysis         | Trimgalore, Bismark, MethPipe, R                                                                                                                                                                              | Trimgalore, Hisat2, Cufflinks, R                                                                                                                                                                               | Not performed / Results extracted from GSE50398 (GSE50244)                                                         | Meffil v1.1.1, smartSVA v0.1.3, pROC v1.16.2, clogitL1 v1.5, survival v3.1-11                              | Not performed   | Packages                                                                                                           | Not performed   |
| Interpretation                 | single CpG / DMR                                                                                                                                                                                              | Pathways KEGG / Network IPA                                                                                                                                                                                    |                                                                                                                    | Single CpG / LASSO                                                                                         | Not performed   | single CpG                                                                                                         | Not performed   |
| Filter criteria and thresholds | i) at least 4 out 5 samples with read counts in both groups, ii) average of read counts per group higher than 20, and iii) standard deviation per group is higher than 0 in both groups.                      | FPKM mean value > 1 in DP or DR group /No fold change filtering applied for the overlap between methylome and transcriptome data                                                                               | All transcript passed the welch-t.test were included                                                               | No                                                                                                         | Not performed   | No                                                                                                                 | Not performed   |
| Statistics                     | p-value<0.05; log-likelihood ratio test                                                                                                                                                                       | p-value<0.05; welch-t.test / correction for multiple testing BH<0.1                                                                                                                                            | p-value<0.05; welch-t.test                                                                                         | Conditional logistic regression, penalized (LASSO) conditional logistic regression                         | Not performed   | p-value<0.05; welch-t.test / correction for multiple testing                                                       | Not performed   |



**Supplementary Table S2:** List of all significantly enriched networks derived from RNA sequencing data (related to Fig. 3 ).

| ID | Molecules in network                                                                                                                                                                                                                                       | Score | Focus molecules | Top diseases and functions                                                     |
|----|------------------------------------------------------------------------------------------------------------------------------------------------------------------------------------------------------------------------------------------------------------|-------|-----------------|--------------------------------------------------------------------------------|
| 1  | <i>ATP4A, CYP4V2, FFAR2, GLP1R, GLUL, HGFAC, HNF1A, MELTF, PCSK9, PFKFB2, SERPINA7, STK11, TMED6, TTYH1</i>                                                                                                                                                | 7     | 12              | Cancer, Gastrointestinal Disease, Hepatic System Disease                       |
| 2  | <i>ATF4, CD44, CPA2, DNAJC3, FBXL17, HAP1, HSP90AA1, HSPA5, KIAA1324, NR1H2, NR5A2, PDX1, PIK3R1, SEL1L, SGPP2, SLIT3, SREBF1, TXNIP, UCN3, XBP1</i>                                                                                                       | 7     | 14              | Carbohydrate Metabolism, Molecular Transport, Small Molecule Biochemistry      |
| 3  | <i>AKT2, AQP7, ATP2A2, C8orf44-SGK3/SGK3, CD38, CTNNB1, CXCL2, FASN, Gcg, GCGR, GIPR, GJD2, GLIS3, GLUD1, GNAS, HADH, IFNG, IL33, IL6, Ins1, KRAS, LEPR, MAFB, NKX2-2, PCSK2, PDX1, PRKCD, RELA, RPS6KB1, SLC2A2, SOCS3, STAT1, STAT3, TNF, VDR</i>        | 5     | 17              | Cell Death and Survival, Endocrine System Disorders, Gastrointestinal Disease  |
| 4  | <i>ABCC8, AKT1, Ank2, ATF5, CACNA1C, CAMK2D, CDKN2A, CX3CL1, DIO3, EIF4EBP1, FGFR1, Gcg, GPR119, IRS2, ITPR1, KRT8, MAFA, MAFB, MNX1, NFE2L1, NKX6-1, P2RY14, PAX6, PDX1, PIK3R1, RAPGEF3, RBP1, REG1B, SLC2A2, SOD2, SPTBN4, SST, TIMP2, TXNIP, VEGFA</i> | 5     | 17              | Metabolic Disease, Digestive System Development and Function, Organ Morphology |
| 5  | <i>CAV1, CDKN1A, EGFR, EIF5A, FAM3B, FN1, mir-8, PTTG1, RAI14, RBM4, SPARC, XIAP, XRN2</i>                                                                                                                                                                 | 3     | 8               | Cellular Movement, Cellular Development, Cellular Growth and Proliferation     |



**Supplementary Table S3:** All transcripts encoding epigenetic modifiers and transcription factors with **unadjusted p-value<0.05**.

| Gene symbol | Mean.FPKM.DR | Mean.FPKM.DP | sd.DR | sd.DP | FC     | FC    | unadjusted p-value | Gene_ID              | Transcript_ID        | Locus                    | Mgi_description                                                                                                 |
|-------------|--------------|--------------|-------|-------|--------|-------|--------------------|----------------------|----------------------|--------------------------|-----------------------------------------------------------------------------------------------------------------|
| Mbd6        | 0.332        | 1.070        | 0.218 | 0.439 | 3.224  | 3.224 | 0.0157             | ENSMUSG000000025409  | ENSMUST00000136169   | chr10:127281955-12728366 | methyl-CpG binding domain protein 6                                                                             |
| Kmt2e       | 0.392        | 3.055        | 0.444 | 1.307 | 7.793  | 7.793 | 0.0079             | ENSMUSG000000029004  | ENSMUST00000196260   | chr5:23485548-23502862   | lysine (K)-specific methyltransferase 2E                                                                        |
| Mit1        | 0.435        | 1.202        | 0.400 | 0.308 | 2.766  | 2.766 | 0.0103             | ENSMUSG000000004996  | ENSMUST000000005122  | chr8:84253930-84257247   | methylthioribose-1-phosphate isomerase 1                                                                        |
| Smarcc2     | 0.456        | 1.306        | 0.206 | 0.448 | 2.862  | 2.862 | 0.0095             | ENSMUSG000000025369  | ENSMUST00000218228   | chr10:128459247-12849048 | SWI/SNF related, matrix associated, actin dependent regulator of chromatin, subfamily c, member 2               |
| Kmt5c       | 0.586        | 1.254        | 0.251 | 0.259 | 2.796  | 2.796 | 0.0038             | ENSMUSG000000035541  | ENSMUST00000135541   | chr7:4740152-4742468     | lysine methyltransferase 5C                                                                                     |
| Tmmu        | 0.788        | 1.246        | 0.133 | 0.353 | 1.581  | 1.581 | 0.0411             | ENSMUSG000000022396  | ENSMUST00000161784   | chr15:85892576-85894476  | rRNA 5-methylaminomethyl-2-thiouridyate methyltransferase                                                       |
| Mett26      | 0.835        | 1.316        | 0.304 | 0.333 | 1.575  | 1.575 | 0.0447             | ENSMUSG0000000025731 | ENSMUST00000110456   | chr17:25875463-25877160  | methyltransferase like 26                                                                                       |
| Mett2       | 1.056        | 0.756        | 0.166 | 0.107 | -1.398 | 1.398 | 0.0117             | ENSMUSG000000020691  | ENSMUST00000136214   | chr11:105126478-10514039 | methyltransferase like 2                                                                                        |
| Mbd4        | 1.128        | 1.489        | 0.128 | 0.217 | 1.320  | 1.320 | 0.0167             | ENSMUSG000000030322  | ENSMUST00000032469   | chr6:115840696-115853371 | methyl-CpG binding domain protein 4                                                                             |
| Ash2l       | 1.153        | 0.721        | 0.195 | 0.317 | -1.599 | 1.599 | 0.0373             | ENSMUSG000000031575  | ENSMUST00000142358   | chr8:25823143-25829360   | ASH2 like histone lysine methyltransferase complex subunit                                                      |
| Kmt5a       | 1.176        | 0.635        | 0.390 | 0.212 | -1.852 | 1.852 | 0.0335             | ENSMUSG000000049327  | ENSMUST00000135667   | chr5:124450383-124459943 | lysine methyltransferase 5A                                                                                     |
| Chaf1b      | 1.178        | 1.953        | 0.127 | 0.326 | 1.658  | 1.658 | 0.0039             | ENSMUSG000000022945  | ENSMUST00000023666   | chr6:93883900-93906115   | chromatin assembly factor 1, subunit B (p60)                                                                    |
| Ss18l2      | 1.238        | 0.706        | 0.240 | 0.215 | -1.754 | 1.754 | 0.0062             | ENSMUSG000000032526  | ENSMUST00000217579   | chr9:121710466-121712820 | SS18, nBAF chromatin remodeling complex subunit like 2                                                          |
| Smarcc2     | 1.263        | 3.842        | 0.434 | 0.981 | 3.043  | 3.043 | 0.0024             | ENSMUSG000000024921  | ENSMUST00000207118   | chr19:26748399-26778133  | SWI/SNF related, matrix associated, actin dependent regulator of chromatin, subfamily a, member 2               |
| Smarcd1     | 1.450        | 2.418        | 0.501 | 0.543 | 1.667  | 1.667 | 0.0191             | ENSMUSG000000029920  | ENSMUST00000204801   | chr6:65042582-65056438   | SWI/SNF-related, matrix-associated actin-dependent regulator of chromatin, subfamily a, containing DEAD/H box 1 |
| Cont        | 1.490        | 2.446        | 0.373 | 0.294 | 1.642  | 1.642 | 0.0023             | ENSMUSG0000000003326 | ENSMUST00000115609   | chr16:18407345-18426852  | catechol-O-methyltransferase                                                                                    |
| Pemt        | 1.632        | 2.340        | 0.403 | 0.424 | 1.434  | 1.434 | 0.0269             | ENSMUSG0000000003031 | ENSMUST00000102693   | chr11:59970613-60046481  | phosphatidylethanolamine N-methyltransferase                                                                    |
| Kmt5a       | 1.715        | 0.975        | 0.468 | 0.417 | -1.760 | 1.760 | 0.0301             | ENSMUSG000000049327  | ENSMUST00000138766   | chr5:124446703-124457118 | lysine methyltransferase 5A                                                                                     |
| Mbd5        | 1.821        | 1.248        | 0.221 | 0.269 | -1.459 | 1.459 | 0.0066             | ENSMUSG000000036792  | ENSMUST00000122841   | chr2:49255660-49316998   | methyl-CpG binding domain protein 5                                                                             |
| Mbd5        | 2.009        | 1.623        | 0.184 | 0.135 | -1.237 | 1.237 | 0.0063             | ENSMUSG000000036792  | ENSMUST00000112754   | chr2:48949522-49316972   | methyl-CpG binding domain protein 5                                                                             |
| Emg1        | 2.114        | 1.399        | 0.177 | 0.150 | -1.511 | 1.511 | 0.0001             | ENSMUSG000000004268  | ENSMUST00000204334   | chr8:124704084-124708413 | EMG1 N1-specific pseudouridine methyltransferase                                                                |
| Dnm1        | 2.267        | 2.479        | 0.160 | 0.085 | 1.094  | 1.094 | 0.0394             | ENSMUSG000000021692  | ENSMUST00000022203   | chr13:106947128-10696022 | DNM1 dimethyladenosine transferase 1-like (S. cerevisiae)                                                       |
| Ehmt1       | 2.594        | 1.322        | 0.625 | 0.817 | -1.963 | 1.963 | 0.0261             | ENSMUSG000000036893  | ENSMUST00000102938   | chr2:24791156-24919591   | euchromatic histone methyltransferase 1                                                                         |
| Mett13      | 2.624        | 1.962        | 0.214 | 0.187 | -1.337 | 1.337 | 0.0009             | ENSMUSG000000026694  | ENSMUST00000028017   | chr1:162532126-162548551 | methyltransferase like 13                                                                                       |
| Rp8         | 2.725        | 1.913        | 0.348 | 0.519 | -1.424 | 1.424 | 0.0229             | ENSMUSG000000030888  | ENSMUST000000098148  | chr7:105732403-105737385 | ribosomal RNA processing 8, methyltransferase, homolog (yeast)                                                  |
| Lcm2        | 2.754        | 2.074        | 0.355 | 0.171 | -1.328 | 1.328 | 0.0090             | ENSMUSG000000074890  | ENSMUST00000110674   | chr2:121137597-121140653 | leucine carboxyl methyltransferase 2                                                                            |
| Kdm4b       | 3.066        | 2.192        | 0.087 | 0.625 | -1.398 | 1.398 | 0.0346             | ENSMUSG0000000024201 | ENSMUST00000141507   | chr17:56383939-56402870  | lysine (K)-specific demethylase 4B                                                                              |
| Ss18l1      | 3.480        | 2.674        | 0.233 | 0.525 | -1.301 | 1.301 | 0.0225             | ENSMUSG000000039086  | ENSMUST00000041126   | chr2:180042508-180070201 | SS18, nBAF chromatin remodeling complex subunit like 1                                                          |
| Hp1bp3      | 3.577        | 2.271        | 0.935 | 0.373 | -1.575 | 1.575 | 0.0319             | ENSMUSG000000028759  | ENSMUST00000137865   | chr4:138216625-138226023 | heterochromatin protein 1, binding protein 3                                                                    |
| Dnm1        | 3.598        | 4.349        | 0.298 | 0.505 | 1.209  | 1.209 | 0.0264             | ENSMUSG000000004099  | ENSMUST00000004202   | chr9:20907208-20952979   | DNA methyltransferase (cytosine-5) 1                                                                            |
| Mett8       | 3.804        | 3.003        | 0.560 | 0.324 | -1.267 | 1.267 | 0.0303             | ENSMUSG000000041975  | ENSMUST00000112186   | chr2:70964560-71055583   | methyltransferase like 8                                                                                        |
| Tmm61a      | 4.067        | 6.831        | 0.293 | 1.065 | 1.434  | 1.434 | 0.0184             | ENSMUSG000000060950  | ENSMUST00000084947   | chr12:111678104-11168390 | rRNA methyltransferase 61A                                                                                      |
| Kmt2c       | 4.090        | 2.965        | 0.658 | 0.703 | -1.379 | 1.379 | 0.0312             | ENSMUSG000000038056  | ENSMUST00000172556   | chr5:25272425-25308550   | lysine (K)-specific methyltransferase 2C                                                                        |
| Mett6       | 4.514        | 5.341        | 0.511 | 0.321 | 1.183  | 1.183 | 0.0190             | ENSMUSG000000021891  | ENSMUST00000055303   | chr14:31478319-31495030  | methyltransferase like 6                                                                                        |
| Rnmt        | 4.579        | 6.696        | 0.721 | 0.921 | 1.462  | 1.462 | 0.0041             | ENSMUSG000000009535  | ENSMUST000000025427  | chr18:68300399-68321906  | rRNA (guanine-7-) methyltransferase                                                                             |
| Smarcc2     | 4.641        | 1.365        | 0.104 | 1.196 | -3.401 | 3.401 | 0.0020             | ENSMUSG000000025862  | ENSMUST000000025862  | chr19:26605051-26778321  | SWI/SNF related, matrix associated, actin dependent regulator of chromatin, subfamily a, member 2               |
| Prrt1       | 4.894        | 9.588        | 0.867 | 0.745 | 1.959  | 1.959 | 0.0000             | ENSMUSG00000109324   | ENSMUST00000207659   | chr7:44976757-44986356   | protein arginine N-methyltransferase 1                                                                          |
| Mmnab       | 4.997        | 3.689        | 0.485 | 0.700 | -1.355 | 1.355 | 0.0106             | ENSMUSG000000029575  | ENSMUST000000031560  | chr5:114431033-114444060 | methylmalonic aciduria (cobalamin deficiency) cblB type homolog (human)                                         |
| Pcmt1       | 5.002        | 3.398        | 0.471 | 0.819 | -1.472 | 1.472 | 0.0080             | ENSMUSG000000019795  | ENSMUST00000159977   | chr10:7647618-7681130    | protein-L-isoaspartate (D-aspartate) O-methyltransferase 1                                                      |
| Pcmt1       | 5.002        | 2.054        | 0.544 | 2.054 | -2.350 | 2.350 | 0.0325             | ENSMUSG000000051285  | ENSMUST00000182623   | chr17:7069165-7172122    | protein-L-isoaspartate (D-aspartate) O-methyltransferase 1                                                      |
| Ehmt2       | 5.089        | 3.188        | 0.919 | 0.305 | -1.596 | 1.596 | 0.0075             | ENSMUSG000000013787  | ENSMUST00000124846   | chr17:34906001-34908558  | euchromatic histone lysine N-methyltransferase 2                                                                |
| Mett1       | 5.217        | 3.644        | 0.556 | 1.241 | -1.432 | 1.432 | 0.0445             | ENSMUSG000000006732  | ENSMUST00000135655   | chr10:127041956-12704400 | methyltransferase like 1                                                                                        |
| Kmt2b       | 5.244        | 4.431        | 0.426 | 0.526 | -1.183 | 1.183 | 0.0288             | ENSMUSG000000006307  | ENSMUST000000006470  | chr7:30568857-30588717   | lysine (K)-specific methyltransferase 2B                                                                        |
| Acin1       | 5.299        | 3.925        | 0.796 | 0.864 | -1.350 | 1.350 | 0.0310             | ENSMUSG000000022185  | ENSMUST00000124271   | chr14:54644726-54648578  | apoptotic chromatin condensation inducer 1                                                                      |
| Mecp2       | 5.422        | 3.736        | 0.881 | 0.958 | -1.451 | 1.451 | 0.0201             | ENSMUSG000000031393  | ENSMUST00000170481   | X:74026827-74135363      | methyl CpG binding protein 2                                                                                    |
| Ntmt1       | 5.481        | 6.695        | 0.413 | 0.984 | 1.221  | 1.221 | 0.0484             | ENSMUSG000000026857  | ENSMUST00000041830   | chr2:30807825-30820333   | N-terminal Xaa-Pro-Lys N-methyltransferase 1                                                                    |
| Prrt3       | 6.133        | 0.526        | 0.305 | 0.369 | 1.203  | 1.203 | 0.0032             | ENSMUSG000000030505  | ENSMUST00000032715   | chr7:49778345-49858265   | protein arginine N-methyltransferase 3                                                                          |
| Smarcd3     | 6.336        | 8.257        | 0.701 | 1.465 | 1.303  | 1.303 | 0.0399             | ENSMUSG000000028949  | ENSMUST00000144995   | chr5:24590817-24601976   | SWI/SNF related, matrix associated, actin dependent regulator of chromatin, subfamily d, member 3               |
| Kdm4b       | 6.634        | 4.634        | 0.484 | 1.417 | -1.417 | 1.417 | 0.0047             | ENSMUSG0000000005036 | ENSMUST0000000005036 | chr17:5632373-56402864   | lysine (K)-specific demethylase 4B                                                                              |
| Cnmt1       | 6.589        | 5.202        | 0.622 | 0.303 | -1.267 | 1.267 | 0.0051             | ENSMUSG000000024019  | ENSMUST00000138939   | chr17:29687055-29703359  | cap methyltransferase 1                                                                                         |
| Camt1       | 7.193        | 5.498        | 0.756 | 0.613 | -1.308 | 1.308 | 0.0050             | ENSMUSG000000032185  | ENSMUST000000034703  | chr9:21546893-21589467   | coactivator-associated arginine methyltransferase 1                                                             |
| Smarcc1     | 7.727        | 6.741        | 0.657 | 0.375 | -1.146 | 1.146 | 0.0251             | ENSMUSG000000032481  | ENSMUST0000000088716 | chr9:110131979-110240178 | SWI/SNF related, matrix associated, actin dependent regulator of chromatin, subfamily c, member 1               |
| Smarcd1     | 8.081        | 6.475        | 0.920 | 0.346 | -1.248 | 1.248 | 0.0141             | ENSMUSG000000023018  | ENSMUST000000023759  | chr15:99702286-99713995  | SWI/SNF related, matrix associated, actin dependent regulator of chromatin, subfamily d, member 1               |
| Mbd6        | 8.984        | 4.511        | 0.841 | 0.652 | -1.992 | 1.992 | 0.0000             | ENSMUSG000000025409  | ENSMUST000000026476  | chr10:127281955-12728889 | methyl-CpG binding domain protein 6                                                                             |
| Ppme1       | 9.100        | 3.270        | 1.016 | 2.147 | -2.783 | 2.783 | 0.0018             | ENSMUSG000000030718  | ENSMUST000000207622  | chr7:100327349-100335278 | protein phosphatase methyltransferase 1                                                                         |
| Tmm2b       | 9.277        | 7.226        | 0.686 | 0.622 | -1.284 | 1.284 | 0.0012             | ENSMUSG0000000067369 | ENSMUST000000087541  | X:134223094-134276982    | TRM2 tRNA methyltransferase 2B                                                                                  |
| Ash1l       | 9.428        | 7.071        | 0.313 | 0.909 | -1.333 | 1.333 | 0.0029             | ENSMUSG000000028053  | ENSMUST000000030953  | chr3:88965811-89079373   | ASH1 like histone lysine methyltransferase                                                                      |
| Kdm6b       | 9.967        | 8.006        | 0.834 | 0.647 | -1.248 | 1.248 | 0.0034             | ENSMUSG000000018476  | ENSMUST000000094077  | chr11:89398507-69413675  | KDM1 lysine (K)-specific demethylase 6B                                                                         |
| Shmt2       | 10.115       | 7.977        | 1.539 | 1.214 | -2.68  | 2.68  | 0.0422             | ENSMUSG000000025403  | ENSMUST000000026470  | chr10:127517138-12752244 | serine hydroxymethyltransferase 2 (mitochondrial)                                                               |
| Camkmt      | 10.375       | 8.362        | 0.705 | 1.430 | -1.241 | 1.241 | 0.0311             | ENSMUSG000000071037  | ENSMUST000000095188  | chr17:85090725-85458139  | calmodulin-lysine N-methyltransferase                                                                           |
| Kmt2e       | 10.526       | 8.454        | 0.821 | 0.983 | -1.245 | 1.245 | 0.0072             | ENSMUSG000000029004  | ENSMUST00000004962   | chr5:23434440-23504235   | lysine (K)-specific methyltransferase 2E                                                                        |
| Ash2l       | 10.726       | 8.094        | 1.372 | 0.787 | -1.325 | 1.325 | 0.0088             | ENSMUSG000000031575  | ENSMUST00000166078   | chr8:25816869-25840082   | ASH2 like histone lysine methyltransferase complex subunit                                                      |
| Mbd3        | 11.340       | 9.031        | 1.827 | 1.039 | -1.256 | 1.256 | 0.0472             | ENSMUSG000000035478  | ENSMUST000000092295  | chr10:80392538-80399550  | methyl-CpG binding domain protein 3                                                                             |
| Mbd6        | 12.344       | 9.200        | 1.948 | 1.091 | -1.342 | 1.342 | 0.0186             | ENSMUSG000000025409  | ENSMUST00000119078   | chr10:127281955-12728901 | methyl-CpG binding domain protein 6                                                                             |
| Coq5        | 12.548       | 11.067       | 1.040 | 0.937 | -1.134 | 1.134 | 0.0458             | ENSMUSG0000000041733 | ENSMUST0000000040421 | chr5:115279665-115296972 | coenzyme Q5 methyltransferase                                                                                   |
| Kmt5a       | 12.881       | 9.474        | 1.899 | 1.113 | -1.360 | 1.360 | 0.0119             | ENSMUSG000000049327  | ENSMUST000000059580  | chr5:124439929-124462308 | lysine methyltransferase 5A                                                                                     |
| Kdm2a       | 13.544       | 12.132       | 0.816 | 0.826 | -1.116 | 1.116 | 0.0171             | ENSMUSG000000054611  | ENSMUST00000175856   | chr19:4316169-4397077    | lysine (K)-specific demethylase 2A                                                                              |
| Acin1       | 15.270       | 12.427       | 0.828 | 1.595 | -1.229 | 1.229 | 0.0122             | ENSMUSG000000024935  | ENSMUST00000147714   | chr14:54642161-54686616  | apoptotic chromatin condensation inducer 1                                                                      |
| Pcmt1       | 16.055       | 18.833       | 0.621 | 2.248 | 1.173  | 1.173 | 0.0486             | ENSMUSG000000019795  | ENSMUST00000163085   | chr10:7637729-7663261    | protein-L-isoaspartate (D-aspartate) O-methyltransferase 1                                                      |
| Mbd2        | 16.148       | 4.367        | 5.830 | 6.233 | -3.698 | 3.698 | 0.0150             | ENSMUSG000000024513  | ENSMUST00000128555   | chr18:70617772-70625777  | methyl-CpG binding domain protein 2                                                                             |
| Chtop       | 18.201       | 22.747       | 2.836 | 1.485 | 1.250  | 1.250 | 0.0190             | ENSMUSG000000001017  | ENSMUST00000049937   | chr3:90498964-90500498   | chromatin target of PRMT1                                                                                       |
| Kdm2b       | 18.494       | 14.086       | 1.514 | 3.004 | -1.313 | 1.313 | 0.0267             | ENSMUSG000000029475  | ENSMUST000000031435  | chr5:122870667-122900355 | lysine (K)-specific demethylase 2B                                                                              |
| Pcmt1a      | 21.143       | 17.925       | 0.826 | 1.940 | -1.180 | 1.180 | 0.0168             | ENSMUSG000000036940  | ENSMUST              |                          |                                                                                                                 |



|                  |         |        |        |        |        |        |          |                      |                     |                           |                                                                          |
|------------------|---------|--------|--------|--------|--------|--------|----------|----------------------|---------------------|---------------------------|--------------------------------------------------------------------------|
| <i>Hnmpa2b1</i>  | 8.706   | 4.280  | 2.911  | 2.530  | -2.034 | 2.034  | 0.0339   | ENSMUSG00000004980   | ENSMUST00000204158  | chr6:51461123-51469845    | heterogeneous nuclear ribonucleoprotein A2/B1                            |
| <i>Hnmpa3</i>    | 74.612  | 86.675 | 4.722  | 8.964  | 1.162  | 1.162  | 0.0370   | ENSMUSG000000059005  | ENSMUST00000111961  | chr2:75659279-75666121    | heterogeneous nuclear ribonucleoprotein A3                               |
| <i>Hnmpa3</i>    | 50.122  | 76.613 | 5.975  | 17.498 | 1.529  | 1.529  | 0.0244   | ENSMUSG000000059005  | ENSMUST00000111964  | chr2:75659260-75665839    | heterogeneous nuclear ribonucleoprotein A3                               |
| <i>Hnmpab</i>    | 1.603   | 2.544  | 0.320  | 0.712  | 1.587  | 1.587  | 0.0386   | ENSMUSG000000020358  | ENSMUST00000101249  | chr1:51600868-51606847    | heterogeneous nuclear ribonucleoprotein A/B                              |
| <i>Hnmpd</i>     | 21.487  | 18.487 | 1.762  | 2.216  | -1.162 | -1.162 | 0.0468   | ENSMUSG000000000568  | ENSMUST00000112539  | chr5:99960997-99978917    | heterogeneous nuclear ribonucleoprotein D                                |
| <i>Hnmpdl</i>    | 3.186   | 4.639  | 0.691  | 1.033  | 1.425  | 1.425  | 0.0451   | ENSMUSG000000029328  | ENSMUST00000141337  | chr5:100034827-100336725  | heterogeneous nuclear ribonucleoprotein D-like                           |
| <i>Hnmpdl</i>    | 4.082   | 5.825  | 0.539  | 0.435  | 1.427  | 1.427  | 0.0006   | ENSMUSG000000029328  | ENSMUST00000149384  | chr5:100035425-100038895  | heterogeneous nuclear ribonucleoprotein D-like                           |
| <i>Hnmpk</i>     | 5.793   | 4.302  | 0.942  | 0.886  | -1.347 | 1.347  | 0.0328   | ENSMUSG000000021546  | ENSMUST00000176558  | chr13:58397036-58402116   | heterogeneous nuclear ribonucleoprotein K                                |
| <i>Hnmpk</i>     | 7.410   | 3.077  | 2.269  | 3.346  | -2.408 | 2.408  | 0.0475   | ENSMUSG000000021546  | ENSMUST00000177019  | chr13:58391238-58402464   | heterogeneous nuclear ribonucleoprotein K                                |
| <i>Hnmpk</i>     | 1.583   | 5.696  | 1.474  | 2.537  | 3.599  | 3.599  | 0.0185   | ENSMUSG000000021546  | ENSMUST00000177051  | chr13:58391949-58393868   | heterogeneous nuclear ribonucleoprotein K                                |
| <i>Hnmpk</i>     | 1.915   | 2.652  | 0.432  | 0.535  | 1.385  | 1.385  | 0.0446   | ENSMUSG000000021546  | ENSMUST00000177497  | chr13:58391238-58398055   | heterogeneous nuclear ribonucleoprotein K                                |
| <i>Hnmpm</i>     | 35.816  | 40.969 | 2.467  | 3.089  | 1.144  | 1.144  | 0.0205   | ENSMUSG000000059208  | ENSMUST00000087582  | chr17:33646238-33685388   | heterogeneous nuclear ribonucleoprotein M                                |
| <i>Hnmpu</i>     | 0.336   | 3.014  | 0.750  | 2.160  | 8.974  | 8.974  | 0.0476   | ENSMUSG000000039630  | ENSMUST00000189450  | chr1:178323619-178329407  | heterogeneous nuclear ribonucleoprotein U                                |
| <i>Hnmpul</i>    | 9.709   | 7.781  | 1.214  | 1.247  | -1.248 | 1.248  | 0.0392   | ENSMUSG000000040725  | ENSMUST000000043765 | chr17:2571481-25754750    | heterogeneous nuclear ribonucleoprotein U-like 1                         |
| <i>Aatf</i>      | 8.713   | 7.710  | 0.312  | 0.675  | -1.130 | 1.130  | 0.0255   | ENSMUSG000000018697  | ENSMUST00000118841  | chr1:184422854-84513522   | apoptosis antagonizing transcription factor                              |
| <i>Ahctf1</i>    | 6.814   | 5.984  | 0.503  | 0.384  | -1.139 | 1.139  | 0.0203   | ENSMUSG000000026491  | ENSMUST00000027768  | chr1:179744893-179803680  | AT hook containing transcription factor 1                                |
| <i>Atf2</i>      | 8.641   | 5.694  | 1.329  | 1.223  | -1.517 | 1.517  | 0.0066   | ENSMUSG000000021271  | ENSMUST00000112010  | chr2:73816508-73892536    | activating transcription factor 2                                        |
| <i>Atf5</i>      | 141.013 | 64.199 | 19.413 | 23.223 | -2.196 | 2.196  | 0.0005   | ENSMUSG000000038539  | ENSMUST00000047356  | chr7:44812255-44816658    | activating transcription factor 5                                        |
| <i>Atf7</i>      | 6.555   | 5.931  | 0.255  | 0.475  | -1.105 | 1.105  | 0.0405   | ENSMUSG000000099083  | ENSMUST00000184616  | chr15:102528635-102625451 | activating transcription factor 7                                        |
| <i>Bclaf1</i>    | 13.993  | 11.279 | 0.992  | 0.781  | -1.241 | 1.241  | 0.0016   | ENSMUSG000000037608  | ENSMUST00000043881  | chr10:20312483-20342499   | BCL2-associated transcription factor 1                                   |
| <i>Bpif</i>      | 8.611   | 7.665  | 0.375  | 0.235  | -1.123 | 1.123  | 0.0023   | ENSMUSG000000040481  | ENSMUST000000057892 | chr1:107033080-10713192   | bromodomain PHD finger transcription factor                              |
| <i>Dach1</i>     | 9.824   | 5.797  | 1.319  | 1.484  | -1.695 | 1.695  | 0.0020   | ENSMUSG000000056934  | ENSMUST00000086934  | chr1:97786852-98169543    | dachshund family transcription factor 1                                  |
| <i>E2f4</i>      | 20.753  | 27.809 | 1.407  | 2.063  | -1.165 | 1.165  | 0.0349   | ENSMUSG000000020996  | ENSMUST00000159093  | chr8:105227662-105305370  | E2F transcription factor 4                                               |
| <i>E2f5</i>      | 8.968   | 7.541  | 0.465  | 0.656  | -1.189 | 1.189  | 0.0051   | ENSMUSG000000027552  | ENSMUST00000029069  | chr3:14578640-14603909    | E2F transcription factor 5                                               |
| <i>Gtlf2</i>     | 8.376   | 5.581  | 2.092  | 1.645  | -1.501 | 1.501  | 0.0485   | ENSMUSG000000060261  | ENSMUST00000111261  | chr5:134237836-134314746  | general transcription factor II I                                        |
| <i>Gtlf2</i>     | 18.963  | 11.903 | 2.153  | 4.911  | -1.593 | 1.593  | 0.0287   | ENSMUSG000000060261  | ENSMUST00000172904  | chr5:134237842-134279865  | general transcription factor II I                                        |
| <i>Gtlf2</i>     | 15.218  | 12.215 | 1.049  | 1.961  | -1.246 | 1.246  | 0.0229   | ENSMUSG000000060261  | ENSMUST00000173341  | chr5:134237838-134314720  | general transcription factor II I                                        |
| <i>Gtlf2ird1</i> | 1.120   | 0.820  | 0.118  | 0.046  | -1.365 | 1.365  | 0.0028   | ENSMUSG000000023079  | ENSMUST000000200944 | chr5:134357678-134456576  | general transcription factor II I repeat domain-containing 1             |
| <i>Gtlf3c1</i>   | 18.108  | 13.941 | 0.621  | 2.636  | -1.299 | 1.299  | 0.0222   | ENSMUSG000000032777  | ENSMUST000000055506 | chr17:125640953-125707780 | general transcription factor III C 1                                     |
| <i>Gtlf3c2</i>   | 6.139   | 4.675  | 0.654  | 0.680  | -1.313 | 1.313  | 0.0085   | ENSMUSG0000000106864 | ENSMUST000000202639 | chr5:31156520-31180117    | general transcription factor IIIC, polypeptide 2, beta                   |
| <i>Gtlf3c3</i>   | 6.710   | 5.957  | 0.200  | 0.571  | -1.126 | 1.126  | 0.0391   | ENSMUSG000000041303  | ENSMUST000000041638 | chr1:54396003-54438971    | general transcription factor IIIC, polypeptide 3                         |
| <i>Hsp1</i>      | 2.269   | 2.033  | 0.171  | 0.136  | -1.116 | 1.116  | 0.0434   | ENSMUSG000000020996  | ENSMUST00000167458  | chr12:31929382-319502223  | high mobility group box transcription factor 1                           |
| <i>Hsp4</i>      | 2.154   | 1.304  | 0.395  | 0.486  | -1.651 | 1.651  | 0.0168   | ENSMUSG000000033249  | ENSMUST000000036127 | chr8:105269800-105275845  | heat shock transcription factor 4                                        |
| <i>Isl1</i>      | 34.332  | 25.139 | 3.718  | 3.243  | -1.366 | 1.366  | 0.0033   | ENSMUSG000000042258  | ENSMUST00000036060  | chr13:116298280-116309681 | ISL1 transcription factor, LIM/homeodomain                               |
| <i>Isl1</i>      | 3.087   | 2.167  | 0.380  | 0.727  | -1.425 | 1.425  | 0.0459   | ENSMUSG000000042258  | ENSMUST00000177469  | chr13:116306890-116309681 | ISL1 transcription factor, LIM/homeodomain                               |
| <i>Lmx1b</i>     | 2.320   | 1.219  | 0.170  | 0.279  | -1.904 | 1.904  | 0.0002   | ENSMUSG000000038765  | ENSMUST000000041730 | chr2:33560964-33640511    | LIM homeobox transcription factor 1 beta                                 |
| <i>Mbtsp1</i>    | 29.369  | 24.615 | 1.338  | 2.334  | -1.193 | 1.193  | 0.0067   | ENSMUSG000000081835  | ENSMUST000000081835 | chr8:119508155-119558735  | membrane-bound transcription factor peptidase, site 1                    |
| <i>Mtf1</i>      | 5.173   | 4.038  | 0.207  | 0.574  | -1.281 | 1.281  | 0.0088   | ENSMUSG000000028890  | ENSMUST00000106193  | chr4:128402013-128493979  | metal response element binding transcription factor 1                    |
| <i>Myr1</i>      | 5.019   | 3.678  | 0.795  | 1.005  | -1.364 | 1.364  | 0.0490   | ENSMUSG000000010505  | ENSMUST00000129843  | chr2:181797575-181827768  | myelin transcription factor 1                                            |
| <i>Nfix</i>      | 9.792   | 8.607  | 0.485  | 0.943  | -1.138 | 1.138  | 0.0464   | ENSMUSG000000028423  | ENSMUST000000098143 | chr4:40970905-41025993    | nuclear transcription factor, X-box binding 1                            |
| <i>Nfyb</i>      | 1.036   | 0.655  | 0.167  | 0.289  | -1.582 | 1.582  | 0.0408   | ENSMUSG000000020248  | ENSMUST00000127832  | chr10:82752415-82763663   | nuclear transcription factor-Y beta                                      |
| <i>Pou2f1</i>    | 2.404   | 2.172  | 0.125  | 0.181  | -1.107 | 1.107  | 0.0494   | ENSMUSG000000026605  | ENSMUST000000160260 | chr1:165885153-166002678  | POU domain, class 2, transcription factor 1                              |
| <i>Sall1</i>     | 5.046   | 3.548  | 0.369  | 0.720  | -1.422 | 1.422  | 0.0061   | ENSMUSG000000031665  | ENSMUST000000034090 | chr8:89027234-89044162    | spalt like transcription factor 1                                        |
| <i>Sall2</i>     | 3.967   | 3.450  | 0.175  | 0.343  | -1.150 | 1.150  | 0.0242   | ENSMUSG000000049532  | ENSMUST00000135523  | chr14:52311171-52316323   | spalt like transcription factor 2                                        |
| <i>Sall4</i>     | 1.859   | 1.334  | 0.190  | 0.298  | -1.393 | 1.393  | 0.0133   | ENSMUSG000000027547  | ENSMUST00000029061  | chr2:168748331-168767201  | spalt like transcription factor 4                                        |
| <i>Sim1</i>      | 1.804   | 1.275  | 0.258  | 0.202  | -1.416 | 1.416  | 0.0075   | ENSMUSG000000019913  | ENSMUST00000020071  | chr10:50895650-50899152   | single-minded family bHLH transcription factor 1                         |
| <i>Sp4</i>       | 4.159   | 3.254  | 0.449  | 0.593  | -1.278 | 1.278  | 0.0281   | ENSMUSG000000025323  | ENSMUST000000026367 | chr12:118234931-118301444 | trans-acting transcription factor 4                                      |
| <i>Srebf1</i>    | 20.831  | 16.375 | 1.136  | 1.610  | -1.272 | 1.272  | 0.0014   | ENSMUSG000000020538  | ENSMUST000000020846 | chr1:180199088-60220604   | sterol regulatory element binding transcription factor 1                 |
| <i>Srebf1</i>    | 5.407   | 2.506  | 0.821  | 0.027  | -1.227 | 1.227  | 0.0077   | ENSMUSG000000018460  | ENSMUST00000184600  | chr1:180199088-60207188   | sterol regulatory element binding transcription factor 1                 |
| <i>Srebf1</i>    | 2.258   | 0.792  | 1.095  | 2.489  | -2.849 | 2.849  | 0.0370   | ENSMUSG000000020538  | ENSMUST00000136215  | chr1:180206949-60222581   | sterol regulatory element binding transcription factor 1                 |
| <i>Srebf1</i>    | 11.881  | 7.769  | 0.947  | 2.418  | -1.529 | 1.529  | 0.0155   | ENSMUSG000000020538  | ENSMUST00000144942  | chr1:180200462-60210465   | sterol regulatory element binding transcription factor 1                 |
| <i>Srebf1</i>    | 1.536   | 0.791  | 0.292  | 0.403  | -1.941 | 1.941  | 0.0115   | ENSMUSG000000020538  | ENSMUST00000154925  | chr1:180201800-60203857   | sterol regulatory element binding transcription factor 1                 |
| <i>Tcf12</i>     | 3.246   | 1.970  | 0.685  | 0.497  | -1.648 | 1.648  | 0.0112   | ENSMUSG000000032228  | ENSMUST00000185117  | chr9:71844722-72111651    | transcription factor 12                                                  |
| <i>Tfe3</i>      | 1.954   | 0.651  | 0.808  | 0.901  | -3.000 | 3.000  | 0.0431   | ENSMUSG000000000134  | ENSMUST00000115677  | X:7763958-7775201         | transcription factor E3                                                  |
| <i>Ubf1</i>      | 10.373  | 6.193  | 0.978  | 1.389  | -1.675 | 1.675  | 0.0008   | ENSMUSG000000020923  | ENSMUST00000107123  | chr11:102306297-102317631 | upstream binding transcription factor, RNA polymerase I                  |
| <i>Ubf1</i>      | 3.314   | 0.950  | 0.801  | 1.153  | -3.490 | 3.490  | 0.0068   | ENSMUSG000000020923  | ENSMUST00000178839  | chr11:102304560-102319091 | upstream binding transcription factor, RNA polymerase I                  |
| <i>Ubf2</i>      | 19.930  | 15.733 | 2.405  | 1.839  | -1.267 | 1.267  | 0.0159   | ENSMUSG000000058239  | ENSMUST000000058860 | chr7:30945247-30956803    | upstream transcription factor 2                                          |
| <i>Ubf2</i>      | 9.657   | 6.447  | 2.156  | 1.498  | -1.498 | 1.498  | 0.0350   | ENSMUSG000000058239  | ENSMUST00000171338  | chr7:30948579-30956757    | upstream transcription factor 2                                          |
| <i>Yy1</i>       | 21.428  | 18.749 | 1.694  | 0.625  | -1.143 | 1.143  | 0.0206   | ENSMUSG000000021264  | ENSMUST00000021692  | chr12:108792972-10881663  | YY1 transcription factor                                                 |
| <i>Tfdp2</i>     | 0.044   | 1.491  | 0.098  | 0.335  | 34.169 | 34.169 | 0.0003   | ENSMUSG000000032411  | ENSMUST00000190709  | chr9:96196379-96247087    | transcription factor Dp 2                                                |
| <i>Ubf1</i>      | 0.179   | 2.192  | 0.386  | 1.362  | 12.243 | 12.243 | 0.0273   | ENSMUSG000000020923  | ENSMUST00000174302  | chr11:102304559-102319091 | upstream binding transcription factor, RNA polymerase I                  |
| <i>Crc2</i>      | 0.330   | 1.105  | 0.357  | 0.347  | 3.349  | 3.349  | 0.0084   | ENSMUSG000000027936  | ENSMUST00000123964  | chr3:90254323-90258633    | CREB regulated transcription coactivator 2                               |
| <i>Tcf19</i>     | 0.760   | 2.215  | 0.507  | 0.623  | 2.915  | 2.915  | 0.0040   | ENSMUSG000000050410  | ENSMUST00000159009  | chr17:35514653-35516820   | transcription factor 19                                                  |
| <i>Maz</i>       | 1.677   | 3.619  | 0.784  | 1.504  | 2.158  | 2.158  | 0.0427   | ENSMUSG000000020541  | ENSMUST000000205461 | chr7:127022889-127026572  | MYC-associated zinc finger protein (purine-binding transcription factor) |
| <i>Gtf2a2</i>    | 0.854   | 1.672  | 0.418  | 0.597  | 1.958  | 1.958  | 0.0396   | ENSMUSG000000033543  | ENSMUST00000119413  | chr9:70012570-70022737    | general transcription factor II A, 2                                     |
| <i>E2f2</i>      | 1.009   | 1.970  | 0.126  | 0.474  | 1.951  | 1.951  | 0.0088   | ENSMUSG000000018993  | ENSMUST000000061721 | chr4:136172393-136196057  | E2F transcription factor 2                                               |
| <i>Eif4</i>      | 0.714   | 1.313  | 0.258  | 0.353  | 1.840  | 1.840  | 0.0171   | ENSMUSG000000031103  | ENSMUST00000114958  | X:48411045-48454169       | E74-like factor 4 (ets domain transcription factor)                      |
| <i>Tadp1</i>     | 1.920   | 3.447  | 0.823  | 0.579  | 1.795  | 1.795  | 0.0112   | ENSMUSG000000026563  | ENSMUST00000138148  | chr1:166379316-166388928  | transcriptional adaptor 1                                                |
| <i>Phf1</i>      | 2.291   | 3.964  | 0.701  | 0.970  | 1.730  | 1.730  | 0.0159   | ENSMUSG000000058388  | ENSMUST000000063717 | chr3:103968257-104007488  | putative homeodomain transcription factor 1                              |
| <i>Tcea15</i>    | 0.791   | 1.310  | 0.218  | 0.347  | 1.655  | 1.655  | 0.0264   | ENSMUSG000000054034  | ENSMUST00000066819  | X:136200947-136203876     | transcription elongation factor A (SII)-like 5                           |
| <i>Tcf15</i>     | 0.708   | 1.136  | 0.198  | 0.308  | 1.604  | 1.604  | 0.0357   | ENSMUSG000000068079  | ENSMUST000000089112 | chr2:152143560-152149097  | transcription factor 15                                                  |
| <i>Stat2</i>     | 0.737   | 1.152  | 0.088  | 0.185  | 1.564  | 1.564  | 0.0044   | ENSMUSG000000040033  | ENSMUST000000218863 | chr10:128270558-128277411 | signal transducer and activator of transcription 2                       |
| <i>E2f1</i>      | 2.768   | 4.049  | 0.788  | 0.860  | 1.463  | 1.463  | 0.0398   | ENSMUSG000000027490  | ENSMUST00000103145  | chr2:154559406-154569892  | E2F transcription factor 1                                               |
| <i>Ust2-ps1</i>  | 6.156   | 8.987  | 1.806  | 1.870  | 1.460  | 1.460  | 0.0409</ |                      |                     |                           |                                                                          |



**Supplementary Table S4:** Pathway enrichment analysis of 1374 genes displayed differential expression in islets of both DP animals and in diabetic subjects ( see Figure 3). Both datasets were obtained from RNA sequencing, **unadjusted** p-value<0.05.

| Category     | Term                                        | Genes                                     | Number of genes | Fold Enrichment | unadjusted p-value |
|--------------|---------------------------------------------|-------------------------------------------|-----------------|-----------------|--------------------|
| KEGG_PATHWAY | Metabolic pathways                          | TUSC3, GNPDA1, PTGS2, GNPDA2, HMGCR       | 143             | 1.6             | 5.10E-09           |
| KEGG_PATHWAY | Huntington's disease                        | UQCRC2, POLR2G, POLR2F, DNAH9, NDUFB      | 39              | 2.7             | 1.40E-08           |
| KEGG_PATHWAY | Pyrimidine metabolism                       | POLR2G, POLR2F, POLR2E, POLR2L, POLR      | 23              | 3.2             | 1.50E-06           |
| KEGG_PATHWAY | Oxidative phosphorylation                   | UQCRC2, NDUFB6, NDUFB7, NDUFAB1, AT       | 28              | 2.8             | 1.40E-06           |
| KEGG_PATHWAY | Ribosome                                    | RPL18, MRPS14, MRPS12, RPL15, RPL35, R    | 28              | 2.7             | 3.30E-06           |
| KEGG_PATHWAY | Lysosome                                    | SGSH, GNPTG, CLTB, HEXA, GUSB, ATP6V      | 25              | 2.9             | 4.30E-06           |
| KEGG_PATHWAY | RNA polymerase                              | POLR2G, POLR2F, POLR2E, POLR2L, POLR      | 10              | 4.7             | 1.70E-04           |
| KEGG_PATHWAY | Non-alcoholic fatty liver disease (NAFLD)   | UQCRC2, NDUFB6, NDUFB7, PRKAG1, NDU       | 25              | 2.2             | 3.00E-04           |
| KEGG_PATHWAY | Purine metabolism                           | POLR2G, POLR2F, POLR2E, GMPR2, POLR2      | 26              | 2               | 9.00E-04           |
| KEGG_PATHWAY | Alzheimer's disease                         | UQCRC2, NDUFB6, NDUFB7, NDUFAB1, CO       | 26              | 2.1             | 7.60E-04           |
| KEGG_PATHWAY | Parkinson's disease                         | UQCRC2, NDUFA4, NDUFA2, NDUFB10, NDU      | 23              | 2.2             | 8.50E-04           |
| KEGG_PATHWAY | Synaptic vesicle cycle                      | ATP6V0C, ATP6V1A, CLTB, ATP6V1E1, STX1    | 13              | 2.9             | 1.30E-03           |
| KEGG_PATHWAY | Cell cycle                                  | CDK1, ANAPC2, E2F2, FZR1, RBL2, CDC23,    | 20              | 2.3             | 1.20E-03           |
| KEGG_PATHWAY | Valine, leucine and isoleucine degradation  | ALDH7A1, ACADSB, EHHADH, OXCT1, MCC       | 12              | 3               | 1.50E-03           |
| KEGG_PATHWAY | Phosphatidylinositol signaling system       | SYNJ1, PI4KA, PIP5K1C, PPIP5K1, ITPKB, PI | 16              | 2.3             | 3.50E-03           |
| KEGG_PATHWAY | Oxytocin signaling pathway                  | ACTB, MYL6, HRAS, GNAO1, CAMK1G, PTG      | 21              | 2               | 4.90E-03           |
| KEGG_PATHWAY | Fatty acid degradation                      | ACOX1, ALDH7A1, ACADSB, EHHADH, ADH4      | 10              | 2.8             | 7.10E-03           |
| KEGG_PATHWAY | Collecting duct acid secretion              | AOX1, ACADSB, SCD2, EHHADH, ACACA, F      | 7               | 3.6             | 1.10E-02           |
| KEGG_PATHWAY | Inositol phosphate metabolism               | MTMR3, PLCE1, PLCB4, INPP5K, SYNJ1, PI    | 12              | 2.4             | 1.00E-02           |
| KEGG_PATHWAY | Vasopressin-regulated water reabsorption    | DYNC111, ARHGDIG, CREB3, DYNC2H1, GN      | 9               | 2.9             | 1.00E-02           |
| KEGG_PATHWAY | Regulation of actin cytoskeleton            | ACTB, HRAS, VAV3, ROCK2, WASF1, SSH2,     | 26              | 1.7             | 9.40E-03           |
| KEGG_PATHWAY | Biosynthesis of antibiotics                 | TALDO1, HMGCR, EHHADH, ADH5, AASS, A      | 26              | 1.7             | 9.90E-03           |
| KEGG_PATHWAY | Fatty acid metabolism                       | COX1, ACADSB, SCD2, EHHADH, ACACA, F      | 10              | 2.7             | 9.30E-03           |
| KEGG_PATHWAY | Protein export                              | SRP14, IMMP2L, SEC61B, SRP54A, SEC11A,    | 7               | 3.4             | 1.50E-02           |
| KEGG_PATHWAY | Cytosolic DNA-sensing pathway               | POLR2F, POLR2E, POLR2L, POLR1D, RIPK1     | 11              | 2.4             | 1.50E-02           |
| KEGG_PATHWAY | Dopaminergic synapse                        | GNAO1, CREB3, KIF5A, GNAI1, GNG11, AR     | 18              | 1.9             | 1.50E-02           |
| KEGG_PATHWAY | Protein processing in endoplasmic reticulum | RAD23B, SEC24B, SEC31A, TUSC3, RRP1,      | 21              | 1.7             | 1.60E-02           |
| KEGG_PATHWAY | Progesterone-mediated oocyte maturation     | ANAPC2, CDK1, FZR1, GNAI1, CDC23, CPEE    | 13              | 2.1             | 2.00E-02           |
| KEGG_PATHWAY | p53 signaling pathway                       | CCNB1, CDK1, CDKN1A, CCNB2, CCND2, B      | 11              | 2.3             | 2.00E-02           |
| KEGG_PATHWAY | Phagosome                                   | DYNC111, ACTB, ITGB5, ATP6V1H, ATP6V1E    | 21              | 1.7             | 2.00E-02           |
| KEGG_PATHWAY | Lysine degradation                          | ALDH7A1, PLOD3, EHHADH, ASH1L, AASS, I    | 9               | 2.4             | 3.00E-02           |
| KEGG_PATHWAY | Other glycan degradation                    | MAN2B2, HEXA, NEU1, FUCA1, GBA            | 5               | 3.9             | 3.50E-02           |
| KEGG_PATHWAY | Insulin secretion                           | KCNMA1, GCG, PLCB4, CREB3, SLC2A2, GN     | 12              | 1.9             | 4.20E-02           |
| KEGG_PATHWAY | Propanoate metabolism                       | EHHADH, ACACA, ABAT, HIBCH, ACAT1, HA     | 6               | 3.1             | 4.00E-02           |
| KEGG_PATHWAY | Butanoate metabolism                        | EHHADH, OXCT1, ABAT, HADH, ACAT1, HAL     | 6               | 3.1             | 4.00E-02           |
| KEGG_PATHWAY | Insulin signaling pathway                   | HRAS, SOCS3, SOCS3, PRKAG1, FLOT1, AC     | 17              | 1.7             | 4.10E-02           |
| KEGG_PATHWAY | Focal adhesion                              | ACTB, HRAS, VAV3, TNXB, ROCK2, MET, IT    | 23              | 1.6             | 3.90E-02           |
| KEGG_PATHWAY | GABAergic synapse                           | GPHN, GNAO1, GNB2, GNAI1, GLS, ABAT, G    | 12              | 1.9             | 4.50E-02           |



Supplementary Table S5: Identification of differentially methylated regions *unadjusted p-value*<0.05

| Chromosome | Position   | unadjusted p-value | p-value Neighbors | Beta.DR | Methylation, DR in % | Beta.DP | Methylation, DP in % | sd.bDR | sd.DR in % | SEM.DR in % | sd.bDP | sd.DP in % | SEM.DP in % | delta_meth | Delta methylation in % | DMRs.annotations | Human conservation | CpG localization | Exact genic localization | Gene symbol |
|------------|------------|--------------------|-------------------|---------|----------------------|---------|----------------------|--------|------------|-------------|--------|------------|-------------|------------|------------------------|------------------|--------------------|------------------|--------------------------|-------------|
| chr1       | 3,968,495  | 4.94E-02           | 4.94E-02          | 0.520   | 52.000               | 0.778   | 77.778               | 0.285  | 28.465     | 5.693       | 0.095  | 9.539      | 1.908       | 0.258      | 25.778                 | 1,1              | --                 | Open Sea         | Intergenic               |             |
| chr1       | 3,969,244  | 3.05E-02           | 7.79E-02          | 0.650   | 64.964               | 0.788   | 78.846               | 0.177  | 11.659     | 2.332       | 0.072  | 7.244      | 1.449       | 0.139      | 13.883                 | 1,1              | --                 | Open Sea         | Intergenic               |             |
| chr1       | 4,293,808  | 1.21E-02           | 5.07E-05          | 0.583   | 58.333               | 0.841   | 84.091               | 0.279  | 27.873     | 5.575       | 0.149  | 14.907     | 2.981       | 0.258      | 25.758                 | 2,1              | --                 | Open Sea         | Intergenic               |             |
| chr1       | 5,235,330  | 5.27E-05           | 5.47E-01          | 0.541   | 54.054               | 0.811   | 81.091               | 0.277  | 27.824     | 5.573       | 0.074  | 7.224      | 1.449       | 0.139      | 13.883                 | 2,1              | --                 | Open Sea         | Intergenic               |             |
| chr1       | 5,337,125  | 4.17E-02           | 8.23E-02          | 0.610   | 60.976               | 0.816   | 81.579               | 0.198  | 19.754     | 3.951       | 0.163  | 16.328     | 3.266       | 0.200      | 20.603                 | 3,1              | --                 | Open Sea         | Intergenic               |             |
| chr1       | 5,337,214  | 3.60E-02           | 6.53E-03          | 0.658   | 65.789               | 0.854   | 85.417               | 0.126  | 12.638     | 2.528       | 0.147  | 14.704     | 2.941       | 0.196      | 19.627                 | 3,1              | --                 | Open Sea         | Intergenic               |             |
| chr1       | 6,305,013  | 2.47E-03           | 3.08E-04          | 0.226   | 22.642               | 0.541   | 54.098               | 0.144  | 14.398     | 2.880       | 0.169  | 16.860     | 3.372       | 0.315      | 31.457                 | 4,1              | --                 | Open Sea         | Intergenic               |             |
| chr1       | 6,305,028  | 1.47E-02           | 3.08E-04          | 0.211   | 21.053               | 0.136   | 13.633               | 0.195  | 19.542     | 3.788       | 0.250  | 2.958      | 0.250       | 2.958      | 2.958                  | 4,1              | --                 | Open Sea         | Intergenic               |             |
| chr1       | 7,407,591  | 1.85E-02           | 1.85E-02          | 0.779   | 77.477               | 0.841   | 84.103               | 0.286  | 28.607     | 5.575       | 0.224  | 22.400     | 4.000       | 0.250      | 25.000                 | 5,1              | --                 | Open Sea         | Intergenic               |             |
| chr1       | 7,447,986  | 4.93E-02           | 5.68E-02          | 0.479   | 47.917               | 0.662   | 66.176               | 0.245  | 24.466     | 4.893       | 0.075  | 7.509      | 1.502       | 0.183      | 18.260                 | 5,1              | AC                 | Open Sea         | Intergenic               |             |
| chr1       | 11,527,033 | 3.71E-02           | 2.14E-03          | 0.250   | 25.000               | 0.542   | 54.167               | 0.182  | 18.197     | 3.639       | 0.172  | 17.202     | 3.440       | 0.292      | 29.167                 | 6,1              | --                 | Open Sea         | Intergenic               |             |
| chr1       | 11,527,089 | 1.05E-02           | 1.22E-03          | 0.785   | 78.571               | 0.469   | 46.975               | 0.123  | 12.338     | 2.468       | 0.141  | 14.063     | 2.813       | 0.317      | 31.696                 | 6,1              | --                 | Open Sea         | Intergenic               |             |
| chr1       | 16,946,337 | 3.64E-02           | 3.12E-03          | 0.242   | 24.242               | 0.537   | 53.704               | 0.194  | 19.415     | 3.883       | 0.206  | 20.641     | 4.128       | 0.295      | 29.461                 | 7,1              | --                 | Open Sea         | Intergenic               |             |
| chr1       | 16,946,380 | 2.31E-02           | 2.09E-03          | 0.167   | 16.667               | 0.444   | 44.444               | 0.124  | 12.400     | 2.480       | 0.171  | 17.050     | 3.410       | 0.278      | 27.778                 | 7,1              | --                 | Open Sea         | Intergenic               |             |
| chr1       | 17,689,388 | 1.13E-02           | 7.42E-04          | 0.195   | 19.585               | 0.486   | 48.649               | 0.106  | 10.575     | 2.115       | 0.256  | 25.550     | 5.110       | 0.291      | 29.136                 | 8,1              | --                 | Open Sea         | Intergenic               |             |
| chr1       | 17,689,492 | 1.25E-02           | 7.42E-04          | 0.302   | 30.189               | 0.552   | 55.224               | 0.203  | 20.336     | 4.068       | 0.100  | 9.954      | 1.991       | 0.250      | 25.035                 | 8,1              | --                 | Open Sea         | Intergenic               |             |
| chr1       | 18,962,705 | 2.42E-02           | 1.23E-03          | 0.297   | 29.730               | 0.621   | 62.669               | 0.173  | 17.295     | 3.459       | 0.319  | 31.918     | 6.384       | 0.323      | 32.339                 | 9,1              | --                 | Open Sea         | Intergenic               |             |
| chr1       | 18,962,720 | 4.44E-02           | 2.20E-03          | 0.351   | 35.135               | 0.594   | 59.375               | 0.189  | 18.855     | 3.771       | 0.289  | 28.870     | 5.774       | 0.242      | 24.240                 | 9,1              | AG                 | Open Sea         | Intergenic               |             |
| chr1       | 21,795,508 | 4.08E-02           | 1.06E-01          | 0.700   | 70.000               | 0.865   | 86.538               | 0.152  | 15.183     | 3.037       | 0.095  | 9.501      | 1.900       | 0.165      | 16.538                 | 10,1             | --                 | Open Sea         | Intergenic               |             |
| chr1       | 21,796,053 | 5.90E-03           | 5.90E-03          | 0.724   | 72.368               | 0.500   | 50.000               | 0.053  | 5.274      | 1.055       | 0.176  | 17.620     | 3.564       | 0.224      | 22.368                 | 10,1             | --                 | Open Sea         | Intergenic               |             |
| chr1       | 22,421,917 | 2.60E-02           | 1.85E-02          | 0.516   | 51.613               | 0.706   | 70.588               | 0.257  | 22.734     | 4.547       | 0.111  | 11.059     | 2.212       | 0.190      | 18.975                 | 11,1             | CT                 | Open Sea         | Intergenic               |             |
| chr1       | 22,421,932 | 4.41E-02           | 1.85E-02          | 0.333   | 33.333               | 0.541   | 54.054               | 0.188  | 18.782     | 3.756       | 0.234  | 23.388     | 4.678       | 0.207      | 20.721                 | 11,1             | AG                 | Open Sea         | Intergenic               |             |
| chr1       | 23,589,078 | 6.01E-03           | 6.01E-03          | 0.711   | 71.053               | 0.894   | 89.394               | 0.323  | 32.339     | 6.468       | 0.080  | 8.040      | 1.608       | 0.183      | 18.341                 | 12,1             | C-                 | Open Sea         | Intergenic               |             |
| chr1       | 24,589,354 | 4.58E-02           | 4.73E-02          | 0.850   | 85.000               | 0.390   | 39.043               | 0.293  | 29.046     | 4.253       | 0.266  | 26.266     | 5.266       | 0.200      | 20.000                 | 12,1             | CA                 | Open Sea         | Intergenic               |             |
| chr1       | 25,570,900 | 4.54E-02           | 8.01E-02          | 0.371   | 37.143               | 0.592   | 59.184               | 0.080  | 7.958      | 1.592       | 0.172  | 17.153     | 3.431       | 0.220      | 22.041                 | 13,1             | --                 | Open Sea         | Intergenic               |             |
| chr1       | 25,571,158 | 1.85E-02           | 1.85E-02          | 0.804   | 80.435               | 0.579   | 57.895               | 0.119  | 11.893     | 2.379       | 0.300  | 29.962     | 5.992       | 0.225      | 22.540                 | 13,1             | C-                 | Open Sea         | Intergenic               |             |
| chr1       | 26,372,872 | 4.05E-02           | 1.88E-01          | 0.811   | 81.081               | 0.538   | 53.846               | 0.193  | 19.317     | 3.863       | 0.295  | 29.524     | 5.905       | 0.272      | 27.235                 | 14,1             | --                 | Open Sea         | Intergenic               |             |
| chr1       | 26,372,811 | 1.69E-02           | 1.88E-01          | 0.811   | 81.081               | 0.538   | 53.846               | 0.193  | 19.317     | 3.863       | 0.295  | 29.524     | 5.905       | 0.272      | 27.235                 | 14,1             | --                 | Open Sea         | Intergenic               |             |
| chr1       | 26,372,850 | 1.68E-02           | 5.51E-07          | 0.138   | 13.883               | 0.412   | 41.176               | 0.153  | 15.292     | 3.058       | 0.097  | 9.674      | 1.935       | 0.274      | 27.383                 | 14,1             | TA                 | Open Sea         | Intergenic               |             |
| chr1       | 26,438,007 | 3.86E-03           | 5.51E-07          | 0.404   | 40.351               | 0.719   | 71.875               | 0.282  | 28.197     | 5.639       | 0.167  | 16.730     | 3.346       | 0.315      | 31.524                 | 15,1             | -G                 | Open Sea         | Intergenic               |             |
| chr1       | 26,438,010 | 4.57E-02           | 5.51E-07          | 0.439   | 43.860               | 0.632   | 63.235               | 0.281  | 28.057     | 5.611       | 0.198  | 19.794     | 3.959       | 0.194      | 19.376                 | 15,1             | -G                 | Open Sea         | Intergenic               |             |
| chr1       | 27,118,345 | 1.13E-02           | 6.08E-02          | 0.114   | 11.356               | 0.126   | 12.589               | 0.101  | 10.101     | 1.554       | 0.110  | 11.059     | 2.212       | 0.190      | 18.975                 | 15,1             | CT                 | Open Sea         | Intergenic               |             |
| chr1       | 27,118,849 | 3.35E-02           | 3.35E-02          | 0.179   | 17.857               | 0.458   | 45.833               | 0.391  | 39.102     | 7.820       | 0.191  | 19.105     | 3.821       | 0.280      | 27.976                 | 16,1             | --                 | Open Sea         | Intergenic               |             |
| chr1       | 27,628,233 | 3.51E-02           | 6.93E-02          | 0.532   | 53.191               | 0.279   | 27.907               | 0.253  | 25.304     | 5.061       | 0.189  | 18.889     | 3.778       | 0.293      | 29.285                 | 17,1             | TC                 | Open Sea         | Intergenic               |             |
| chr1       | 27,628,487 | 5.36E-03           | 8.44E-03          | 0.797   | 79.730               | 0.582   | 58.209               | 0.104  | 10.375     | 2.075       | 0.133  | 13.289     | 2.658       | 0.215      | 21.521                 | 17,1             | --                 | Open Sea         | Intergenic               |             |
| chr1       | 29,843,800 | 2.98E-02           | 6.73E-07          | 0.797   | 79.730               | 0.582   | 58.209               | 0.104  | 10.375     | 2.075       | 0.133  | 13.289     | 2.658       | 0.215      | 21.521                 | 17,1             | --                 | Open Sea         | Intergenic               |             |
| chr1       | 29,884,475 | 1.58E-02           | 1.67E-01          | 0.620   | 61.972               | 0.819   | 81.928               | 0.194  | 19.401     | 3.880       | 0.108  | 10.831     | 2.166       | 0.200      | 19.956                 | 18,1             | --                 | Open Sea         | Intergenic               |             |
| chr1       | 30,933,368 | 4.36E-02           | 2.75E-04          | 0.233   | 23.308               | 0.800   | 80.000               | 0.291  | 29.098     | 5.820       | 0.387  | 38.668     | 7.734       | 0.377      | 37.692                 | 19,1             | --                 | Open Sea         | Intergenic               |             |
| chr1       | 30,933,380 | 1.64E-03           | 2.75E-04          | 0.250   | 25.000               | 0.714   | 71.429               | 0.179  | 17.889     | 3.578       | 0.155  | 15.454     | 3.091       | 0.464      | 46.429                 | 19,1             | --                 | Open Sea         | Intergenic               |             |
| chr1       | 33,086,992 | 2.19E-02           | 2.75E-02          | 0.711   | 71.103               | 0.630   | 62.962               | 0.359  | 35.904     | 6.570       | 0.084  | 8.567      | 1.671       | 0.172      | 17.221                 | 20,1             | --                 | Open Sea         | Intergenic               |             |
| chr1       | 33,086,675 | 4.05E-02           | 4.05E-02          | 0.742   | 74.194               | 0.481   | 48.148               | 0.177  | 17.659     | 3.532       | 0.097  | 9.730      | 1.946       | 0.250      | 25.000                 | 20,1             | tg                 | Open Sea         | Intergenic               |             |
| chr1       | 33,426,416 | 2.67E-02           | 2.74E-03          | 0.481   | 48.077               | 0.684   | 68.421               | 0.058  | 5.773      | 1.155       | 0.344  | 34.411     | 6.882       | 0.203      | 20.344                 | 21,1             | --                 | Open Sea         | Intergenic               |             |
| chr1       | 33,426,456 | 1.95E-02           | 2.74E-03          | 0.721   | 72.131               | 0.882   | 88.235               | 0.163  | 16.288     | 3.258       | 0.070  | 7.038      | 1.408       | 0.161      | 16.104                 | 21,1             | --                 | Open Sea         | Intergenic               |             |
| chr1       | 34,224,766 | 1.24E-02           | 1.46E-04          | 0.250   | 25.000               | 0.500   | 50.000               | 0.078  | 7.831      | 1.566       | 0.272  | 27.159     | 5.432       | 0.250      | 25.000                 | 22,1             | --                 | Open Sea         | Intergenic               |             |
| chr1       | 34,224,766 | 1.24E-02           | 1.46E-04          | 0.250   | 25.000               | 0.500   | 50.000               | 0.078  | 7.831      | 1.566       | 0.272  | 27.159     | 5.432       | 0.250      | 25.000                 | 22,1             | --                 | Open Sea         | Intergenic               |             |
| chr1       | 34,224,788 | 5.76E-03           | 3.11E-05          | 0.250   | 25.000               | 0.519   | 51.852               | 0.203  | 20.325     | 4.065       | 0.177  | 17.733     | 3.547       | 0.269      | 26.852                 | 22,1             | TT                 | Open Sea         | Intergenic               |             |
| chr1       | 40,269,146 | 4.73E-03           | 3.72E-03          | 0.205   | 20.455               | 0.481   | 48.077               | 0.130  | 12.971     | 2.594       | 0.127  | 12.681     | 2.536       | 0.276      | 27.622                 | 23,1             | --                 | Open Sea         | Intergenic               |             |
| chr1       | 40,269,146 | 4.73E-03           | 3.72E-03          | 0.205   | 20.455               | 0.481   | 48.077               | 0.130  | 12.971     | 2.594       | 0.127  | 12.681     | 2.536       | 0.276      | 27.622                 | 23,1             | --                 | Open Sea         | Intergenic               |             |
| chr1       | 40,269,192 | 1.96E-02           | 1.26E-03          | 0.178   | 17.778               | 0.389   | 38.889               | 0.110  | 11.011     | 2.202       | 0.180  | 18.018     | 3.604       | 0.211      | 21.111                 | 23,1             | CA                 | Open Sea         | Intergenic               |             |
| chr1       | 40,269,192 | 1.96E-02           | 1.26E-03          | 0.178   | 17.778               | 0.389   | 38.889               | 0.110  | 11.011     | 2.202       | 0.180  | 18.018     | 3.604       | 0.211      | 21.111                 | 23,1             | CA                 | Open Sea         | Intergenic               |             |
| chr1       | 43,627,089 | 7.23E-02           | 7.23E-02          | 0.750   | 75.000               | 0.435   | 43.478               | 0.366  | 36.650     | 7.330       | 0.127  | 12.682     | 2.416       | 0.315      | 31.524                 | 24,1             | --                 | Open Sea         | Intergenic               |             |
| chr1       | 43,777,811 | 3.94E-02           | 4.16E-01          | 0.889   | 88.889               | 0.772   | 77.174               | 0.065  | 6.451      | 1.290       | 0.089  | 8.881      | 1.776       | 0.117      | 11.715                 | 25,1             | --                 | Open Sea         | Intergenic               |             |
| chr1       | 43,777,811 | 3.94E-02           | 4.16E-01          | 0.889   | 88.889               | 0.772   | 77.174               | 0.065  | 6.451      | 1.290       | 0.089  | 8.881      | 1.776       | 0.117      | 11.715                 | 25,1             | --                 | Open Sea         | Intergenic               |             |
| chr1       | 43,777,811 | 3.94E-02           | 4.16E-01          | 0.889   | 88.889               | 0.772   | 77.174               | 0.065  | 6.451      | 1.290       | 0.089  | 8.881      | 1.776       | 0.117      | 11.715                 | 25,1             | --                 | Open Sea         | Intergenic               |             |
| chr1       | 43,777,933 | 3.11E-02           | 2.08E-01          | 0.682   | 68.217               | 0.794   | 79.375               | 0.053  | 5.255      | 1.051       | 0.028  | 2.827      | 0.565       | 0.112      | 11.158                 | 25,1             | --                 | Open Sea         | Intergenic               |             |
| chr1       | 43,777,933 | 3.11E-02           | 2.08E-01          | 0.682   | 68.217               | 0.794   | 79.375               | 0.053  | 5.255      | 1.051       | 0.028  | 2.827      | 0.565       | 0.112      | 11.158                 | 25,1             | --                 | Open Sea         | Intergenic               |             |
| chr1       | 43,777,933 | 3.11E-02           | 2.08E-01          | 0.682   | 68.217               | 0.794   | 79.375               | 0.053  | 5.255      | 1.051       | 0.028  | 2.827      | 0.565       | 0.112      | 11.158                 | 25,1             | --                 | Open Sea         | Intergenic               |             |
| chr1       | 43,778,726 | 1.94E-03           | 7.17E-01          | 0.626   | 62.581               | 0.793   | 79.375               | 0.059  | 5.852      | 1.170       | 0.062  | 6.170      | 1.234       | 0.167      | 16.730                 | 25,1             | --                 | Open             |                          |             |



|      |             |          |          |       |        |       |        |       |        |       |       |        |       |        |         |        |                |          |              |               |  |
|------|-------------|----------|----------|-------|--------|-------|--------|-------|--------|-------|-------|--------|-------|--------|---------|--------|----------------|----------|--------------|---------------|--|
| chr1 | 75,005,581  | 4.24E-02 | 1.94E-03 | 0.121 | 12,121 | 0.357 | 35,714 | 0.135 | 13,491 | 2.698 | 0.214 | 21,369 | 4.274 | 0.236  | 23,593  | 43.1   | CG nearby      | Open Sea | Intron 2/4   | Nhej1         |  |
| chr1 | 75,005,585  | 7.81E-03 | 1.94E-03 | 0.091 | 9,091  | 0.429 | 42,857 | 0.105 | 10,542 | 2.108 | 0.263 | 25,255 | 5.051 | 0.138  | 33,766  | 43.1   |                | Open Sea | Intron 2/4   | Nhej1         |  |
| chr1 | 75,901,943  | 4.49E-02 | 4.49E-02 | 0.512 | 51,163 | 0.657 | 65,657 | 0.376 | 37,657 | 4.047 | 0.047 | 4,732  | 1,566 | 0.155  | 15,564  | 44.1   |                | Open Sea | Intergenic   |               |  |
| chr1 | 75,902,066  | 4.03E-02 | 7.48E-02 | 0.159 | 15,888 | 0.272 | 27,193 | 0.079 | 7,922  | 1.584 | 0.062 | 6,150  | 1,230 | 0.113  | 11,305  | 44.1   |                | Open Sea | Intergenic   |               |  |
| chr1 | 76,253,625  | 3.76E-02 | 4.31E-01 | 0.795 | 79,487 | 0.500 | 50,000 | 0.178 | 17,835 | 3.567 | 0.189 | 18,857 | 3,771 | -0.295 | -29,487 | 45.1   |                | Open Sea | Intergenic   |               |  |
| chr1 | 76,254,620  | 1.09E-02 | 1.09E-02 | 0.630 | 62,963 | 0.303 | 30,303 | 0.258 | 25,760 | 5.152 | 0.109 | 10,900 | 2,180 | -0.327 | -32,660 | 45.1   |                | Open Sea | Intergenic   |               |  |
| chr1 | 79,205,235  | 2.11E-03 | 0.000    | 0.121 | 12,069 | 0.121 | 12,069 | 0.121 | 12,069 | 0.074 | 0.059 | 7,420  | 1,183 | 0.074  | 10,602  | 46.1   | Check manually | Open Sea | Intergenic   |               |  |
| chr1 | 79,205,294  | 4.39E-02 | 3.69E-03 | 0.198 | 19,780 | 0.406 | 40,620 | 0.119 | 11,923 | 2.385 | 0.151 | 15,071 | 3,014 | 0.208  | 20,821  | 46.1   | Check manually | Open Sea | Intergenic   |               |  |
| chr1 | 84,987,979  | 3.58E-02 | 8.18E-02 | 0.701 | 70,079 | 0.814 | 81,429 | 0.163 | 16,336 | 3.267 | 0.094 | 9,368  | 1,874 | 0.113  | 11,350  | 47.1   | --             | Open Sea | Intergenic   |               |  |
| chr1 | 84,988,150  | 3.27E-02 | 1.38E-02 | 0.459 | 45,902 | 0.667 | 66,687 | 0.104 | 10,353 | 2,071 | 0.128 | 12,760 | 2,552 | 0.208  | 20,765  | 47.1   | --             | Open Sea | Intergenic   |               |  |
| chr1 | 85,207,728  | 8.03E-01 | 0.000    | 0.000 | 0.000  | 0.000 | 0.000  | 0.000 | 0.000  | 0.000 | 0.000 | 0.000  | 0.000 | 0.000  | 0.000   | 11,193 | 48.1           | --       | Open Sea     | Intergenic    |  |
| chr1 | 85,268,597  | 1.56E-02 | 1.20E-01 | 0.192 | 19,231 | 0.500 | 50,000 | 0.169 | 16,851 | 3,370 | 0.183 | 18,256 | 3,651 | 0.308  | 30,769  | 48.1   | --             | Open Sea | Intron 1/2   | C13002612fRik |  |
| chr1 | 85,588,041  | 3.15E-01 | 2.21E-01 | 0.401 | 40,136 | 0.534 | 53,390 | 0.148 | 14,799 | 2,960 | 0.058 | 5,838  | 1,168 | 0.133  | 13,254  | 49.1   | GG             | Open Sea | Intron 5/11  | Sp110         |  |
| chr1 | 85,588,311  | 3.50E-02 | 6.95E-01 | 0.887 | 88,679 | 0.725 | 72,549 | 0.080 | 7,958  | 1,592 | 0.114 | 11,360 | 2,272 | -0.161 | -16,130 | 49.1   | --             | Open Sea | Intron 5/11  | Sp110         |  |
| chr1 | 88,279,210  | 4.71E-02 | 4.35E-01 | 0.419 | 41,892 | 0.593 | 59,322 | 0.224 | 22,355 | 4,471 | 0.187 | 18,696 | 3,739 | 0.174  | 17,430  | 50.1   | tg             | S Shore  | TSS 2000     | Hjurp         |  |
| chr1 | 88,279,210  | 4.71E-02 | 4.35E-01 | 0.419 | 41,892 | 0.593 | 59,322 | 0.224 | 22,355 | 4,471 | 0.187 | 18,696 | 3,739 | 0.174  | 17,430  | 50.1   | tg             | S Shore  | TSS 2000     | Hjurp         |  |
| chr1 | 88,279,210  | 4.71E-02 | 4.35E-01 | 0.419 | 41,892 | 0.593 | 59,322 | 0.224 | 22,355 | 4,471 | 0.187 | 18,696 | 3,739 | 0.174  | 17,430  | 50.1   | tg             | S Shore  | TSS 2000     | Hjurp         |  |
| chr1 | 88,279,554  | 3.90E-02 | 2.74E-01 | 0.514 | 51,429 | 0.220 | 21,951 | 0.292 | 29,155 | 5,831 | 0.279 | 27,894 | 5,579 | -0.295 | -29,477 | 50.1   | at             | S Shore  | TSS 2000     | Hjurp         |  |
| chr1 | 88,279,554  | 3.90E-02 | 2.74E-01 | 0.514 | 51,429 | 0.220 | 21,951 | 0.292 | 29,155 | 5,831 | 0.279 | 27,894 | 5,579 | -0.295 | -29,477 | 50.1   | at             | S Shore  | TSS 2000     | Hjurp         |  |
| chr1 | 88,279,554  | 3.90E-02 | 2.74E-01 | 0.514 | 51,429 | 0.220 | 21,951 | 0.292 | 29,155 | 5,831 | 0.279 | 27,894 | 5,579 | -0.295 | -29,477 | 50.1   | at             | S Shore  | TSS 2000     | Hjurp         |  |
| chr1 | 88,283,628  | 3.75E-02 | 5.11E-03 | 0.625 | 62,500 | 0.852 | 85,185 | 0.290 | 29,015 | 5,803 | 0.207 | 20,703 | 4,141 | 0.227  | 22,685  | 51.1   | AG             | Open Sea | Intergenic   |               |  |
| chr1 | 88,283,612  | 4.91E-02 | 2.45E-02 | 0.336 | 33,607 | 0.679 | 67,325 | 0.158 | 15,532 | 3,166 | 0.227 | 22,692 | 4,538 | -0.157 | -15,692 | 51.1   | CA             | Open Sea | Intergenic   |               |  |
| chr1 | 93,024,615  | 3.41E-02 | 9.05E-03 | 0.211 | 21,053 | 0.432 | 43,182 | 0.171 | 17,082 | 3,416 | 0.251 | 25,080 | 5,016 | 0.221  | 22,129  | 52.1   | --             | Open Sea | Intergenic   |               |  |
| chr1 | 93,024,618  | 4.64E-02 | 9.05E-03 | 0.351 | 35,135 | 0.581 | 58,140 | 0.273 | 27,287 | 5,457 | 0.066 | 6,596  | 1,319 | 0.230  | 23,004  | 52.1   | --             | Open Sea | Intergenic   |               |  |
| chr1 | 94,391,528  | 8.05E-03 | 1.84E-01 | 0.292 | 29,167 | 0.644 | 64,444 | 0.131 | 13,075 | 2,615 | 0.229 | 22,885 | 4,577 | 0.353  | 35,278  | 53.1   | --             | Open Sea | Intergenic   |               |  |
| chr1 | 94,391,604  | 2.73E-02 | 0.67E-01 | 0.364 | 36,364 | 0.693 | 69,254 | 0.127 | 12,687 | 1,537 | 0.183 | 17,793 | 2,357 | 0.181  | -18,110 | 53.1   | --             | Open Sea | Intergenic   |               |  |
| chr1 | 95,355,608  | 1.37E-05 | 9.73E-05 | 0.200 | 20,000 | 0.474 | 47,368 | 0.376 | 37,636 | 7,027 | 0.080 | 8,001  | 1,600 | 0.227  | 22,527  | 54.1   | --             | Open Sea | Intergenic   |               |  |
| chr1 | 95,355,630  | 2.79E-02 | 9.73E-05 | 0.171 | 17,143 | 0.436 | 43,590 | 0.397 | 39,749 | 7,950 | 0.210 | 21,034 | 4,207 | 0.264  | 26,447  | 54.1   | --             | Open Sea | Intergenic   |               |  |
| chr1 | 95,355,799  | 9.74E-03 | 9.73E-05 | 0.148 | 14,815 | 0.500 | 50,000 | 0.145 | 14,538 | 2,908 | 0.202 | 20,231 | 4,046 | 0.352  | 35,185  | 54.1   | --             | Open Sea | Intergenic   |               |  |
| chr1 | 96,623,179  | 2.78E-02 | 2.91E-02 | 0.415 | 41,535 | 0.725 | 72,549 | 0.129 | 12,869 | 2,574 | 0.129 | 12,905 | 2,581 | -0.186 | -18,615 | 58.1   | --             | Open Sea | Intergenic   |               |  |
| chr1 | 96,623,275  | 4.84E-02 | 7.56E-02 | 0.309 | 30,909 | 0.500 | 50,000 | 0.145 | 14,069 | 2,814 | 0.134 | 13,405 | 2,681 | 0.191  | 19,091  | 58.1   | TA             | Open Sea | Intergenic   |               |  |
| chr1 | 98,786,382  | 4.56E-02 | 4.40E-01 | 0.791 | 79,070 | 0.898 | 89,796 | 0.101 | 10,076 | 2,015 | 0.069 | 6,901  | 1,380 | 0.107  | 10,726  | 58.1   | --             | Open Sea | Intergenic   |               |  |
| chr1 | 98,786,971  | 3.27E-02 | 3.27E-02 | 0.542 | 54,217 | 0.346 | 34,615 | 0.135 | 13,464 | 2,693 | 0.073 | 7,319  | 1,464 | -0.196 | -19,601 | 58.1   | --             | Open Sea | Intergenic   |               |  |
| chr1 | 99,750,498  | 2.69E-02 | 2.69E-02 | 0.389 | 38,903 | 0.292 | 29,167 | 0.393 | 39,223 | 5,846 | 0.279 | 27,894 | 5,579 | -0.295 | -29,477 | 57.1   | --             | Open Sea | Intergenic   |               |  |
| chr1 | 99,751,428  | 1.66E-02 | 1.98E-01 | 0.634 | 63,441 | 0.798 | 79,775 | 0.102 | 10,175 | 2,035 | 0.112 | 11,214 | 2,243 | 0.163  | 16,334  | 57.1   | --             | Open Sea | Intergenic   |               |  |
| chr1 | 100,770,097 | 2.22E-02 | 2.59E-03 | 0.723 | 72,289 | 0.540 | 53,968 | 0.137 | 13,738 | 2,748 | 0.127 | 12,679 | 2,536 | -0.183 | -18,321 | 58.1   | --             | Open Sea | Intergenic   |               |  |
| chr1 | 100,770,109 | 1.82E-02 | 2.59E-03 | 0.803 | 80,282 | 0.617 | 61,687 | 0.129 | 12,869 | 2,574 | 0.129 | 12,905 | 2,581 | -0.186 | -18,615 | 58.1   | --             | Open Sea | Intergenic   |               |  |
| chr1 | 106,066,051 | 1.98E-02 | 2.29E-04 | 0.603 | 60,303 | 0.220 | 22,004 | 0.163 | 16,336 | 3,267 | 0.094 | 9,368  | 1,874 | 0.113  | 11,350  | 59.1   | Check manually | Open Sea | Intergenic   |               |  |
| chr1 | 106,066,215 | 1.17E-02 | 2.35E-04 | 0.694 | 69,355 | 0.481 | 48,052 | 0.105 | 10,493 | 2,099 | 0.108 | 10,760 | 2,152 | -0.203 | -20,303 | 59.1   | CG nearby      | Open Sea | Intergenic   |               |  |
| chr1 | 106,449,396 | 2.98E-02 | 3.61E-02 | 0.726 | 72,581 | 0.845 | 84,466 | 0.063 | 6,303  | 1,261 | 0.339 | 3,862  | 0.772 | 0.119  | 11,885  | 60.1   | GA             | Open Sea | Intergenic   |               |  |
| chr1 | 106,449,415 | 2.69E-02 | 2.02E-02 | 0.600 | 60,000 | 0.759 | 75,904 | 0.130 | 13,007 | 2,601 | 0.160 | 16,027 | 3,205 | 0.159  | 15,904  | 60.1   | AG             | Open Sea | Intergenic   |               |  |
| chr1 | 107,010,562 | 6.00E-02 | 6.00E-02 | 0.240 | 24,000 | 0.626 | 62,600 | 0.126 | 12,560 | 2,151 | 0.144 | 14,512 | 3,141 | 0.144  | 14,512  | 60.1   | --             | Open Sea | Intergenic   |               |  |
| chr1 | 107,211,464 | 2.08E-02 | 2.08E-02 | 0.316 | 31,579 | 0.588 | 58,824 | 0.168 | 16,790 | 3,358 | 0.304 | 30,358 | 6,072 | 0.272  | 27,245  | 61.1   | --             | Open Sea | Intergenic   |               |  |
| chr1 | 107,952,656 | 5.53E-03 | 7.85E-04 | 0.302 | 30,189 | 0.609 | 60,870 | 0.128 | 12,838 | 2,568 | 0.202 | 20,209 | 4,042 | 0.307  | 30,681  | 62.1   | --             | Open Sea | Intergenic   |               |  |
| chr1 | 107,952,698 | 2.28E-02 | 7.85E-04 | 0.580 | 58,000 | 0.804 | 80,435 | 0.317 | 31,659 | 6,332 | 0.093 | 9,310  | 1,862 | 0.224  | 22,435  | 62.1   | --             | Open Sea | Intergenic   |               |  |
| chr1 | 111,390,745 | 2.06E-02 | 0.78E-02 | 0.389 | 38,903 | 0.292 | 29,167 | 0.393 | 39,223 | 5,846 | 0.279 | 27,894 | 5,579 | -0.295 | -29,477 | 63.1   | --             | Open Sea | Intergenic   |               |  |
| chr1 | 111,370,140 | 3.22E-02 | 4.62E-02 | 0.621 | 62,069 | 0.871 | 87,097 | 0.267 | 26,714 | 5,343 | 0.123 | 12,303 | 2,461 | 0.208  | 20,821  | 63.1   | --             | Open Sea | Intergenic   |               |  |
| chr1 | 112,883,589 | 1.26E-02 | 1.76E-03 | 0.542 | 54,217 | 0.328 | 32,813 | 0.257 | 25,694 | 5,139 | 0.220 | 22,004 | 4,401 | -0.214 | -21,404 | 64.1   | --             | Open Sea | Intergenic   |               |  |
| chr1 | 112,883,671 | 2.70E-02 | 1.76E-03 | 0.542 | 54,167 | 0.350 | 35,000 | 0.235 | 23,508 | 4,702 | 0.127 | 12,712 | 2,542 | -0.192 | -19,167 | 64.1   | --             | Open Sea | Intergenic   |               |  |
| chr1 | 113,637,690 | 1.30E-03 | 1.49E-03 | 0.650 | 65,000 | 0.895 | 89,461 | 0.099 | 9,851  | 1,970 | 0.101 | 10,147 | 1,955 | -0.153 | -15,339 | 65.1   | --             | Open Sea | Intergenic   |               |  |
| chr1 | 113,637,758 | 2.73E-02 | 1.49E-03 | 0.748 | 74,775 | 0.606 | 60,584 | 0.141 | 14,089 | 2,818 | 0.162 | 16,229 | 3,246 | -0.142 | -14,191 | 65.1   | --             | Open Sea | Intergenic   |               |  |
| chr1 | 114,890,611 | 2.70E-02 | 1.09E-02 | 0.600 | 60,000 | 0.829 | 82,927 | 0.315 | 31,515 | 6,303 | 0.132 | 13,219 | 2,644 | 0.229  | 22,927  | 66.1   | --             | Open Sea | Intergenic   |               |  |
| chr1 | 114,890,710 | 4.47E-02 | 5.44E-03 | 0.451 | 45,070 | 0.638 | 63,830 | 0.282 | 28,225 | 5,645 | 0.184 | 18,377 | 3,675 | 0.188  | 18,759  | 66.1   | --             | Open Sea | Intergenic   |               |  |
| chr1 | 115,643,983 | 4.75E-02 | 2.70E-02 | 0.723 | 72,320 | 0.655 | 65,625 | 0.133 | 13,271 | 1,255 | 0.162 | 16,262 | 3,117 | -0.165 | -16,559 | 67.1   | --             | Open Sea | Intergenic   |               |  |
| chr1 | 115,644,040 | 3.28E-02 | 2.70E-02 | 0.667 | 66,667 | 0.496 | 49,580 | 0.196 | 19,598 | 3,920 | 0.085 | 8,466  | 1,693 | -0.171 | -17,087 | 67.1   | --             | Open Sea | Intergenic   |               |  |
| chr1 | 117,143,662 | 3.69E-02 | 3.69E-02 | 0.303 | 30,303 | 0.556 | 55,556 | 0.170 | 16,990 | 3,398 | 0.197 | 19,681 | 3,936 | 0.253  | 25,253  | 68.1   | --             | Open Sea | Intergenic   |               |  |
| chr1 | 117,144,515 | 4.07E-02 | 2.72E-01 | 0.731 | 73,077 | 0.879 | 87,879 | 0.127 | 12,673 | 2,535 | 0.074 | 7,392  | 1,478 | 0.148  | 14,802  | 68.1   | --             | Open Sea | Intergenic   |               |  |
| chr1 | 119,604,666 | 2.16E-02 | 2.16E-06 | 0.385 | 38,462 | 0.714 | 71,429 | 0.110 | 10,999 | 2,200 | 0.387 | 38,668 | 7,734 | 0.330  | 32,967  | 69.1   | --             | Open Sea | Intron 14/16 | Epb415        |  |
| chr1 | 119,604,679 | 2.17E-03 | 2.16E-06 | 0.290 | 29,032 | 0.    |        |       |        |       |       |        |       |        |         |        |                |          |              |               |  |



|       |             |          |          |       |        |       |        |       |        |        |       |        |       |        |         |        |                |           |            |
|-------|-------------|----------|----------|-------|--------|-------|--------|-------|--------|--------|-------|--------|-------|--------|---------|--------|----------------|-----------|------------|
| chr1  | 174,110,930 | 2.70E-02 | 3.51E-03 | 0.556 | 55.556 | 0.771 | 77.083 | 0.105 | 10.543 | 2.109  | 0.131 | 13.084 | 2.617 | 0.215  | 21.528  | 93.1   | AA             | Open Sea  | Intergenic |
| chr1  | 174,110,998 | 2.71E-02 | 3.51E-03 | 0.658 | 65.789 | 0.893 | 89.286 | 0.108 | 10.761 | 2.152  | 0.207 | 20.736 | 4.147 | 0.235  | 23.496  | 93.1   | CA             | Open Sea  | Intergenic |
| chr1  | 185,031,331 | 4.78E-02 | 4.74E-03 | 0.652 | 65.424 | 0.854 | 85.024 | 0.102 | 10.379 | 6.402  | 0.128 | 16.377 | 7.872 | 0.232  | 23.450  | 94.1   | CG             | CG Island | Intergenic |
| chr1  | 185,031,335 | 1.89E-02 | 4.74E-03 | 0.473 | 47.273 | 0.683 | 68.116 | 0.096 | 9.620  | 1.924  | 0.055 | 5.537  | 1.107 | 0.208  | 20.843  | 94.1   | --             | CG Island | Intergenic |
| chr1  | 185,031,335 | 4.77E-02 | 2.69E-03 | 0.600 | 60.000 | 0.764 | 76.389 | 0.287 | 28.653 | 5.731  | 0.089 | 8.949  | 1.790 | 0.164  | 16.389  | 94.1   | --             | CG Island | Intergenic |
| chr1  | 185,031,347 | 3.30E-02 | 2.69E-03 | 0.679 | 67.857 | 0.841 | 84.058 | 0.332 | 33.249 | 6.650  | 0.054 | 5.364  | 1.073 | 0.162  | 16.201  | 94.1   | --             | CG Island | Intergenic |
| chr1  | 185,031,361 | 8.69E-03 | 1.61E-03 | 0.634 | 63.364 | 0.586 | 58.294 | 0.105 | 10.582 | 6.006  | 0.128 | 12.775 | 6.789 | 0.206  | 20.352  | 94.1   | --             | CG Island | Intergenic |
| chr1  | 185,031,365 | 1.31E-02 | 1.61E-03 | 0.611 | 61.111 | 0.829 | 82.857 | 0.304 | 30.383 | 6.077  | 0.122 | 12.233 | 2.447 | 0.217  | 21.746  | 94.1   | --             | CG Island | Intergenic |
| chr1  | 185,031,397 | 1.09E-02 | 2.62E-04 | 0.610 | 61.017 | 0.826 | 82.609 | 0.204 | 20.390 | 4.078  | 0.081 | 8.112  | 1.622 | 0.212  | 21.592  | 94.1   | --             | CG Island | Intergenic |
| chr1  | 185,031,399 | 2.67E-02 | 2.62E-04 | 0.600 | 60.000 | 0.822 | 82.192 | 0.254 | 25.414 | 5.083  | 0.068 | 8.949  | 1.970 | 0.222  | 22.192  | 94.1   | --             | CG Island | Intergenic |
| chr1  | 185,031,401 | 4.95E-02 | 2.47E-04 | 0.565 | 56.448 | 0.746 | 74.461 | 0.245 | 24.504 | 5.446  | 0.196 | 19.911 | 2.120 | 0.212  | 21.201  | 94.1   | --             | CG Island | Intergenic |
| chr1  | 185,031,403 | 2.37E-02 | 2.47E-04 | 0.526 | 52.632 | 0.736 | 73.846 | 0.264 | 26.437 | 5.287  | 0.065 | 6.463  | 1.293 | 0.212  | 21.215  | 94.1   | --             | CG Island | Intergenic |
| chr1  | 185,438,378 | 1.33E-03 | 2.46E-01 | 0.783 | 78.261 | 0.292 | 29.167 | 0.201 | 20.125 | 4.025  | 0.195 | 19.525 | 3.905 | -0.491 | -49.094 | 95.1   | Check manually | Open Sea  | Intergenic |
| chr1  | 185,438,690 | 3.96E-02 | 6.80E-01 | 0.611 | 61.111 | 0.789 | 78.873 | 0.292 | 29.154 | 5.831  | 0.131 | 13.141 | 2.628 | 0.178  | 17.762  | 95.1   | ca             | Open Sea  | Intergenic |
| chr1  | 188,257,223 | 2.16E-02 | 1.07E-06 | 0.297 | 29.670 | 0.465 | 46.512 | 0.137 | 13.723 | 2.745  | 0.158 | 15.564 | 3.113 | 0.168  | 16.841  | 96.1   | TG             | Open Sea  | Intergenic |
| chr1  | 188,257,241 | 1.44E-03 | 1.07E-06 | 0.299 | 29.870 | 0.579 | 57.895 | 0.150 | 15.020 | 3.004  | 0.141 | 14.076 | 2.815 | 0.280  | 28.025  | 96.1   | --             | Open Sea  | Intergenic |
| chr1  | 188,257,246 | 2.62E-03 | 1.07E-06 | 0.282 | 28.169 | 0.543 | 54.286 | 0.164 | 16.378 | 3.276  | 0.144 | 14.369 | 2.874 | 0.281  | 28.117  | 96.1   | TG             | Open Sea  | Intergenic |
| chr1  | 188,257,269 | 2.20E-02 | 3.32E-07 | 0.222 | 22.222 | 0.500 | 50.000 | 0.183 | 18.251 | 3.650  | 0.217 | 21.679 | 4.536 | 0.278  | 27.778  | 96.1   | Check manually | Open Sea  | Intergenic |
| chr1  | 189,989,836 | 3.62E-02 | 3.86E-03 | 0.733 | 73.333 | 0.457 | 45.714 | 0.299 | 29.869 | 5.874  | 0.146 | 14.567 | 2.913 | -0.276 | -27.619 | 97.1   | TT             | Open Sea  | Intergenic |
| chr1  | 189,989,861 | 4.25E-02 | 2.30E-03 | 0.655 | 65.517 | 0.353 | 35.294 | 0.375 | 37.481 | 7.496  | 0.253 | 25.318 | 5.064 | -0.302 | -30.223 | 97.1   | CA             | Open Sea  | Intergenic |
| chr1  | 192,902,746 | 1.02E-02 | 1.75E-04 | 0.138 | 13.793 | 0.441 | 44.118 | 0.137 | 13.704 | 2.741  | 0.242 | 24.196 | 4.839 | 0.303  | 30.325  | 98.1   | Check manually | Open Sea  | Intergenic |
| chr1  | 192,902,792 | 3.07E-03 | 1.75E-04 | 0.154 | 15.385 | 0.522 | 52.778 | 0.164 | 16.394 | 2.379  | 0.251 | 25.149 | 5.030 | 0.374  | 37.393  | 98.1   | Check manually | Open Sea  | Intergenic |
| chr1  | 193,244,181 | 4.84E-02 | 1.85E-01 | 0.620 | 62.000 | 0.800 | 80.000 | 0.205 | 20.467 | 4.093  | 0.084 | 8.353  | 1.671 | 0.180  | 18.000  | 99.1   | AG             | Open Sea  | Intergenic |
| chr1  | 193,244,181 | 4.84E-02 | 1.85E-01 | 0.620 | 62.000 | 0.800 | 80.000 | 0.205 | 20.467 | 4.093  | 0.084 | 8.353  | 1.671 | 0.180  | 18.000  | 99.1   | AG             | Open Sea  | Intergenic |
| chr1  | 193,244,486 | 6.03E-03 | 8.20E-03 | 0.750 | 75.000 | 0.429 | 42.857 | 0.378 | 37.781 | 7.556  | 0.221 | 22.085 | 4.417 | -0.321 | -32.143 | 99.1   | AA             | Open Sea  | Intergenic |
| chr1  | 193,244,486 | 6.03E-03 | 8.20E-03 | 0.750 | 75.000 | 0.429 | 42.857 | 0.378 | 37.781 | 7.556  | 0.221 | 22.085 | 4.417 | -0.321 | -32.143 | 99.1   | AA             | Open Sea  | Intergenic |
| chr1  | 193,244,504 | 0.38E-02 | 8.20E-03 | 0.680 | 68.000 | 0.680 | 68.000 | 0.385 | 38.500 | 32.104 | 0.338 | 33.794 | 6.759 | 0.295  | 29.538  | 99.1   | Check manually | Open Sea  | Intergenic |
| chr1  | 193,244,504 | 4.02E-02 | 8.20E-03 | 0.385 | 38.462 | 0.680 | 68.000 | 0.121 | 12.106 | 2.421  | 0.338 | 33.794 | 6.759 | 0.295  | 29.538  | 99.1   | Check manually | Open Sea  | Intergenic |
| chr10 | 4,778,184   | 1.19E-02 | 1.05E-01 | 0.667 | 66.667 | 0.333 | 33.333 | 0.184 | 18.394 | 3.679  | 0.333 | 33.341 | 6.668 | -0.333 | -33.333 | 100.10 | TA             | Open Sea  | Intergenic |
| chr10 | 4,778,443   | 1.77E-02 | 1.05E-01 | 0.667 | 66.667 | 0.333 | 33.333 | 0.184 | 18.394 | 3.679  | 0.333 | 33.341 | 6.668 | -0.333 | -33.333 | 100.10 | TA             | Open Sea  | Intergenic |
| chr10 | 7,912,801   | 2.73E-02 | 1.43E-01 | 0.212 | 21.212 | 0.481 | 48.148 | 0.130 | 13.047 | 2.609  | 0.168 | 16.802 | 3.360 | 0.269  | 26.936  | 101.10 | Check manually | Open Sea  | Intergenic |
| chr10 | 7,912,801   | 2.73E-02 | 1.43E-01 | 0.212 | 21.212 | 0.481 | 48.148 | 0.130 | 13.047 | 2.609  | 0.168 | 16.802 | 3.360 | 0.269  | 26.936  | 101.10 | Check manually | Open Sea  | Intergenic |
| chr10 | 7,912,810   | 1.15E-02 | 1.43E-01 | 0.344 | 34.375 | 0.679 | 67.857 | 0.171 | 17.124 | 3.425  | 0.247 | 24.721 | 4.944 | 0.335  | 33.482  | 101.10 | CT             | Open Sea  | Intergenic |
| chr10 | 7,912,810   | 1.15E-02 | 1.43E-01 | 0.344 | 34.375 | 0.679 | 67.857 | 0.171 | 17.124 | 3.425  | 0.247 | 24.721 | 4.944 | 0.335  | 33.482  | 101.10 | CT             | Open Sea  | Intergenic |
| chr10 | 10,603,885  | 3.02E-02 | 3.87E-04 | 0.500 | 50.000 | 0.756 | 75.610 | 0.299 | 29.916 | 5.983  | 0.143 | 14.251 | 2.850 | 0.256  | 25.610  | 102.10 | TA             | Open Sea  | Intergenic |
| chr10 | 10,603,888  | 1.23E-02 | 3.87E-04 | 0.382 | 38.235 | 0.683 | 68.293 | 0.205 | 20.523 | 4.105  | 0.343 | 34.297 | 6.859 | 0.301  | 30.057  | 102.10 | Check manually | Open Sea  | Intergenic |
| chr10 | 10,603,897  | 2.72E-02 | 1.04E-02 | 0.552 | 55.172 | 0.795 | 79.545 | 0.312 | 31.160 | 6.232  | 0.032 | 3.205  | 0.641 | 0.244  | 24.373  | 102.10 | --             | Open Sea  | Intergenic |
| chr10 | 10,654,609  | 1.03E-02 | 3.65E-02 | 0.679 | 67.929 | 0.334 | 33.346 | 0.106 | 10.595 | 1.08   | 0.295 | 2.95   | 0.236 | 0.139  | 13.295  | 103.10 | Check manually | Open Sea  | Intergenic |
| chr10 | 10,654,703  | 1.03E-02 | 3.65E-02 | 0.290 | 29.000 | 0.479 | 47.899 | 0.333 | 33.340 | 6.668  | 0.130 | 12.962 | 2.592 | 0.189  | 18.899  | 103.10 | ta             | Open Sea  | Intergenic |
| chr10 | 11,037,137  | 3.04E-03 | 1.16E-01 | 0.500 | 50.000 | 0.833 | 83.333 | 0.159 | 15.882 | 3.176  | 0.088 | 9.769  | 1.954 | 0.333  | 33.333  | 104.10 | --             | Open Sea  | Intergenic |
| chr10 | 11,037,505  | 1.32E-02 | 1.29E-01 | 0.900 | 90.000 | 0.686 | 68.571 | 0.059 | 8.539  | 1.708  | 0.204 | 20.435 | 4.087 | -0.214 | -21.429 | 104.10 | AG             | Open Sea  | Intergenic |
| chr10 | 11,953,622  | 3.45E-02 | 3.86E-02 | 0.668 | 66.824 | 0.668 | 66.824 | 0.102 | 10.102 | 8.361  | 0.290 | 29.001 | 6.361 | 0.361  | 36.061  | 105.10 | --             | Open Sea  | Intergenic |
| chr10 | 11,953,684  | 3.66E-02 | 3.50E-02 | 0.854 | 85.366 | 0.634 | 63.415 | 0.184 | 18.353 | 3.671  | 0.376 | 37.564 | 7.513 | -0.220 | -21.951 | 105.10 | --             | Open Sea  | Intergenic |
| chr10 | 14,816,708  | 1.75E-02 | 5.92E-04 | 0.744 | 74.419 | 0.471 | 47.059 | 0.390 | 38.954 | 7.791  | 0.136 | 13.608 | 2.722 | -0.274 | -27.360 | 106.10 | --             | Open Sea  | Intergenic |
| chr10 | 14,816,840  | 6.24E-03 | 5.92E-04 | 0.213 | 21.333 | 0.418 | 41.772 | 0.098 | 9.827  | 1.965  | 0.136 | 13.622 | 2.724 | 0.204  | 20.439  | 106.10 | AA             | Open Sea  | Intergenic |
| chr10 | 16,647,737  | 4.49E-02 | 1.89E-01 | 0.617 | 61.667 | 0.417 | 41.667 | 0.204 | 20.371 | 3.980  | 0.075 | 3.604  | 0.273 | -0.299 | -29.299 | 107.10 | --             | Open Sea  | Intergenic |
| chr10 | 16,648,544  | 3.37E-02 | 4.83E-03 | 0.731 | 73.077 | 0.595 | 59.483 | 0.165 | 16.507 | 3.301  | 0.097 | 9.746  | 1.949 | -0.139 | -13.594 | 107.10 | --             | Open Sea  | Intergenic |
| chr10 | 18,917,498  | 2.29E-02 | 4.45E-04 | 0.422 | 42.188 | 0.232 | 23.188 | 0.217 | 21.717 | 4.343  | 0.152 | 15.181 | 3.036 | -0.190 | -18.999 | 108.10 | C-             | Open Sea  | Intergenic |
| chr10 | 18,917,502  | 2.19E-02 | 4.45E-04 | 0.547 | 54.688 | 0.323 | 32.308 | 0.321 | 32.130 | 6.426  | 0.058 | 5.832  | 1.166 | -0.224 | -22.380 | 108.10 | CA             | Open Sea  | Intergenic |
| chr10 | 20,296,828  | 5.23E-02 | 5.27E-04 | 0.127 | 12.741 | 0.457 | 45.714 | 0.126 | 12.636 | 4.147  | 0.147 | 14.672 | 2.934 | 0.295  | 29.473  | 109.10 | --             | Open Sea  | Intergenic |
| chr10 | 20,296,860  | 3.78E-02 | 2.05E-02 | 0.160 | 16.000 | 0.528 | 52.778 | 0.273 | 27.274 | 5.455  | 0.192 | 19.185 | 3.837 | 0.368  | 36.778  | 109.10 | --             | Open Sea  | Intergenic |
| chr10 | 22,639,216  | 2.36E-02 | 9.48E-02 | 0.677 | 67.742 | 0.889 | 88.889 | 0.184 | 18.426 | 3.685  | 0.138 | 13.766 | 2.753 | 0.211  | 21.147  | 110.10 | --             | Open Sea  | Intergenic |
| chr10 | 22,639,585  | 3.10E-02 | 8.31E-02 | 0.756 | 75.556 | 0.897 | 89.665 | 0.143 | 14.280 | 2.856  | 0.032 | 3.153  | 0.631 | 0.141  | 14.100  | 110.10 | --             | Open Sea  | Intergenic |
| chr10 | 26,664,702  | 1.02E-02 | 1.42E-03 | 0.665 | 66.512 | 0.771 | 77.143 | 0.263 | 26.151 | 4.183  | 0.263 | 26.151 | 4.183 | 0.263  | 26.151  | 111.10 | --             | Open Sea  | Intergenic |
| chr10 | 26,664,714  | 1.96E-02 | 1.42E-03 | 0.419 | 41.860 | 0.694 | 69.444 | 0.195 | 19.532 | 3.906  | 0.241 | 24.114 | 4.823 | 0.276  | 27.584  | 111.10 | --             | Open Sea  | Intergenic |
| chr10 | 28,703,958  | 2.92E-02 | 3.08E-01 | 0.618 | 61.765 | 0.837 | 83.721 | 0.176 | 17.589 | 3.518  | 0.140 | 14.000 | 2.800 | 0.220  | 21.956  | 112.10 | Check manually | Open Sea  | Intergenic |
| chr10 | 28,704,369  | 2.71E-02 | 1.96E-01 | 0.629 | 62.857 | 0.857 | 85.714 | 0.211 | 21.136 | 4.227  | 0.193 | 19.334 | 3.867 | 0.229  | 22.857  | 112.10 | tg             | Open Sea  | Intergenic |
| chr10 | 33,300,870  | 3.30E-02 | 3.62E-01 | 0.625 | 62.500 | 0.833 | 83.333 | 0.145 | 14.534 | 2.907  | 0.163 | 16.334 | 2.907 | 0.200  | 22.729  | 113.10 | CA             | Open Sea  | Intergenic |
| chr10 | 33,301,312  | 4.86E-02 | 4.74E-01 | 0.161 | 16.129 | 0.420 | 42.000 | 0.149 | 14.879 | 2.976  | 0.266 | 26.562 | 5.312 | 0.259  | 25.871  | 113.10 | GC             | Open Sea  | Intergenic |
| chr10 | 33,350,768  | 1.98E-02 | 3.35E-03 | 0.444 |        |       |        |       |        |        |       |        |       |        |         |        |                |           |            |



|       |             |          |          |       |        |       |        |       |        |       |       |        |        |        |         |        |                |          |              |
|-------|-------------|----------|----------|-------|--------|-------|--------|-------|--------|-------|-------|--------|--------|--------|---------|--------|----------------|----------|--------------|
| dhrt0 | 90,737,668  | 2.53E-02 | 3.57E-02 | 0.167 | 16.667 | 0.365 | 36.538 | 0.137 | 13.670 | 2.734 | 0.180 | 17.956 | 3.591  | -0.199 | 19.872  | 136.10 | --             | Open Sea | Intergenic   |
| dhrt0 | 90,738,653  | 8.58E-03 | 4.25E-01 | 0.146 | 14.583 | 0.312 | 31.183 | 0.109 | 10.864 | 2.173 | 0.081 | 8.137  | 1.627  | 0.166  | 16.599  | 136.10 | --             | Open Sea | Intergenic   |
| dhrt0 | 92,240,079  | 2.13E-01 | 2.14E-01 | 0.460 | 33.028 | 0.245 | 47.421 | 0.123 | 12.244 | 2.440 | 0.123 | 12.244 | 2.440  | 0.123  | 12.244  | 137.10 | CG             | Open Sea | Intergenic   |
| dhrt0 | 92,240,213  | 4.61E-02 | 4.81E-02 | 0.438 | 6.970  | 0.698 | 68.876 | 0.346 | 34.826 | 6.925 | 0.155 | 15.500 | 3.100  | 0.260  | 26.017  | 137.10 | CG             | Open Sea | Intergenic   |
| dhrt0 | 94,822,102  | 3.98E-02 | 1.92E-04 | 0.375 | 37.500 | 0.647 | 64.706 | 0.250 | 24.972 | 4.994 | 0.195 | 19.453 | 3.891  | 0.272  | 27.206  | 138.10 | CG nearby      | Open Sea | Intron 21/30 |
| dhrt0 | 94,822,140  | 3.17E-02 | 1.82E-04 | 0.375 | 37.500 | 0.667 | 66.667 | 0.208 | 20.815 | 4.163 | 0.310 | 30.998 | 6.200  | 0.292  | 29.167  | 138.10 | CG             | Open Sea | Intron 21/30 |
| dhrt0 | 94,822,163  | 2.78E-02 | 2.00E-01 | 0.400 | 40.000 | 0.207 | 20.707 | 0.233 | 23.333 | 0.195 | 0.233 | 23.333 | 0.195  | 0.233  | 23.333  | 138.10 | CG             | Open Sea | Intron 21/30 |
| dhrt0 | 94,871,725  | 1.60E-02 | 3.30E-02 | 0.455 | 45.455 | 0.662 | 66.176 | 0.137 | 13.712 | 2.742 | 0.102 | 10.203 | 2.041  | 0.207  | 20.722  | 139.10 | tg             | Open Sea | Intron 5/30  |
| dhrt0 | 94,871,729  | 8.18E-03 | 3.30E-02 | 0.494 | 49.451 | 0.723 | 72.308 | 0.155 | 15.505 | 3.101 | 0.056 | 5.622  | 1.124  | 0.230  | 22.957  | 139.10 | tg             | Open Sea | Intron 5/30  |
| dhrt0 | 98,135,919  | 8.76E-03 | 1.37E-02 | 0.503 | 50.314 | 0.656 | 65.574 | 0.136 | 13.649 | 2.730 | 0.079 | 7.901  | 1.580  | 0.153  | 15.259  | 140.10 | --             | Open Sea | Intergenic   |
| dhrt0 | 98,136,108  | 1.79E-02 | 1.94E-02 | 0.420 | 42.000 | 0.684 | 68.400 | 0.102 | 10.203 | 2.045 | 0.127 | 12.706 | 2.644  | 0.244  | 24.444  | 140.10 | CG             | Open Sea | Intergenic   |
| dhrt0 | 99,247,071  | 2.69E-02 | 1.42E-02 | 0.594 | 59.375 | 0.633 | 63.375 | 0.102 | 10.225 | 2.045 | 0.120 | 12.043 | 2.409  | 0.240  | 23.958  | 141.10 | CG nearby      | Open Sea | Intergenic   |
| dhrt0 | 99,247,111  | 4.29E-02 | 2.86E-02 | 0.700 | 70.000 | 0.884 | 88.372 | 0.182 | 18.222 | 3.644 | 0.112 | 11.180 | 2.236  | 0.184  | 18.372  | 141.10 | CT             | Open Sea | Intergenic   |
| dhrt0 | 99,247,961  | 4.16E-02 | 3.85E-02 | 0.647 | 64.706 | 0.875 | 87.500 | 0.244 | 24.370 | 4.874 | 0.098 | 9.782  | 1.856  | 0.228  | 22.794  | 141.10 | --             | Open Sea | Intergenic   |
| dhrt0 | 99,849,407  | 2.89E-02 | 1.28E-01 | 0.635 | 63.500 | 0.700 | 70.000 | 0.114 | 11.409 | 2.263 | 0.156 | 15.613 | 3.123  | 0.245  | 24.507  | 142.10 | Check manually | Open Sea | Intergenic   |
| dhrt0 | 99,850,380  | 2.27E-02 | 1.45E-01 | 0.582 | 58.209 | 0.779 | 77.895 | 0.300 | 30.300 | 6.006 | 0.139 | 13.898 | 2.780  | 0.197  | 19.686  | 142.10 | Check manually | Open Sea | Intergenic   |
| dhrt0 | 101,762,073 | 4.93E-02 | 3.67E-03 | 0.578 | 57.831 | 0.410 | 41.000 | 0.210 | 21.012 | 4.202 | 0.108 | 10.817 | 2.163  | -0.168 | -16.831 | 143.10 | --             | Open Sea | Intergenic   |
| dhrt0 | 101,762,202 | 4.35E-02 | 3.67E-03 | 0.681 | 68.116 | 0.431 | 83.077 | 0.164 | 16.357 | 3.271 | 0.083 | 8.332  | 1.666  | 0.150  | 14.961  | 143.10 | ag             | Open Sea | Intergenic   |
| dhrt0 | 102,677,505 | 3.81E-02 | 1.79E-01 | 0.460 | 46.043 | 0.582 | 58.170 | 0.333 | 33.333 | 1.467 | 0.088 | 8.752  | 1.750  | 0.121  | 12.127  | 144.10 | --             | Open Sea | Intergenic   |
| dhrt0 | 102,678,184 | 2.28E-02 | 8.49E-01 | 0.600 | 60.000 | 0.875 | 87.500 | 0.224 | 22.223 | 4.445 | 0.207 | 20.750 | 4.150  | 0.275  | 27.500  | 144.10 | CA             | Open Sea | Intergenic   |
| dhrt0 | 103,731,390 | 1.78E-02 | 6.64E-05 | 0.186 | 18.644 | 0.372 | 37.179 | 0.125 | 12.513 | 2.503 | 0.155 | 15.457 | 3.091  | 0.185  | 18.535  | 145.10 | CA             | Open Sea | Intergenic   |
| dhrt0 | 103,731,427 | 3.43E-04 | 6.64E-05 | 0.179 | 17.933 | 0.434 | 43.373 | 0.084 | 8.367  | 1.673 | 0.116 | 11.561 | 2.312  | 0.305  | 30.470  | 145.10 | CG nearby      | Open Sea | Intergenic   |
| dhrt0 | 104,011,999 | 1.18E-02 | 1.45E-01 | 0.667 | 66.667 | 0.763 | 76.316 | 0.283 | 28.300 | 5.660 | 0.125 | 12.506 | 2.501  | 0.296  | 29.649  | 146.10 | --             | Open Sea | Intergenic   |
| dhrt0 | 104,012,376 | 5.00E-02 | 3.56E-01 | 0.855 | 85.455 | 0.702 | 70.175 | 0.105 | 10.509 | 2.102 | 0.158 | 15.831 | 3.166  | -0.153 | -15.279 | 146.10 | --             | Open Sea | Intergenic   |
| dhrt0 | 106,368,956 | 3.05E-02 | 1.70E-01 | 0.862 | 86.207 | 0.692 | 69.231 | 0.069 | 6.944  | 1.389 | 0.170 | 17.050 | 3.410  | -0.170 | -16.976 | 147.10 | --             | Open Sea | Intergenic   |
| dhrt0 | 106,369,999 | 2.85E-02 | 1.70E-01 | 0.769 | 76.923 | 0.558 | 55.814 | 0.128 | 12.845 | 2.569 | 0.159 | 15.912 | 3.162  | -0.214 | -21.109 | 147.10 | --             | Open Sea | Intergenic   |
| dhrt0 | 106,497,444 | 1.85E-02 | 9.47E-03 | 0.791 | 79.070 | 0.514 | 51.429 | 0.791 | 79.070 | 6.600 | 0.320 | 31.86  | 18.614 | -0.276 | -27.641 | 148.10 | --             | Open Sea | Intergenic   |
| dhrt0 | 106,497,764 | 1.39E-02 | 3.04E-01 | 0.721 | 72.093 | 0.856 | 85.616 | 0.112 | 11.159 | 2.232 | 0.134 | 13.445 | 2.689  | 0.135  | 13.523  | 148.10 | --             | Open Sea | Intergenic   |
| dhrt0 | 107,128,148 | 2.88E-02 | 3.03E-01 | 0.903 | 90.323 | 0.667 | 66.667 | 0.088 | 8.768  | 1.754 | 0.264 | 26.406 | 5.281  | -0.237 | -23.656 | 149.10 | CA             | Open Sea | Intergenic   |
| dhrt0 | 107,128,594 | 1.30E-02 | 1.35E-02 | 0.852 | 85.185 | 0.907 | 90.700 | 0.055 | 5.555  | 0.392 | 0.055 | 5.555  | 0.392  | 0.055  | 5.555   | 149.10 | --             | Open Sea | Intergenic   |
| dhrt0 | 108,232,194 | 4.61E-02 | 1.16E-01 | 0.667 | 66.667 | 0.868 | 86.842 | 0.168 | 16.754 | 3.351 | 0.100 | 10.000 | 2.000  | 0.202  | 20.175  | 150.10 | TT             | Open Sea | Intron 4/25  |
| dhrt0 | 108,232,178 | 4.61E-02 | 1.16E-01 | 0.667 | 66.667 | 0.868 | 86.842 | 0.168 | 16.754 | 3.351 | 0.100 | 10.000 | 2.000  | 0.202  | 20.175  | 150.10 | TT             | Open Sea | Intron 4/24  |
| dhrt0 | 108,232,231 | 3.60E-02 | 1.11E-01 | 0.765 | 76.471 | 0.917 | 91.667 | 0.132 | 13.233 | 2.647 | 0.104 | 10.393 | 2.079  | 0.152  | 15.196  | 150.10 | AG             | Open Sea | Intron 4/25  |
| dhrt0 | 108,232,231 | 3.60E-02 | 1.11E-01 | 0.765 | 76.471 | 0.917 | 91.667 | 0.132 | 13.233 | 2.647 | 0.104 | 10.393 | 2.079  | 0.152  | 15.196  | 150.10 | AG             | Open Sea | Intron 4/25  |
| dhrt0 | 108,903,046 | 1.06E-02 | 1.17E-01 | 0.579 | 57.895 | 0.870 | 87.857 | 0.239 | 23.898 | 4.780 | 0.126 | 12.638 | 2.528  | 0.291  | 29.065  | 151.10 | tc             | Open Sea | Intron 1/10  |
| dhrt0 | 108,903,248 | 4.99E-02 | 2.98E-01 | 0.500 | 50.000 | 0.759 | 75.882 | 0.240 | 24.024 | 4.805 | 0.223 | 22.342 | 4.468  | 0.259  | 25.862  | 151.10 | Check manually | Open Sea | Intron 1/10  |
| dhrt0 | 109,092,253 | 1.98E-02 | 1.98E-02 | 0.900 | 90.000 | 0.730 | 73.016 | 0.079 | 7.903  | 1.581 | 0.119 | 11.944 | 2.389  | -0.170 | -16.984 | 152.10 | -a             | Open Sea | Intergenic   |
| dhrt0 | 109,092,473 | 2.09E-02 | 2.72E-04 | 0.903 | 90.323 | 0.667 | 66.667 | 0.208 | 20.815 | 4.163 | 0.310 | 30.998 | 6.200  | 0.292  | 29.167  | 152.10 | ag             | Open Sea | Intergenic   |
| dhrt0 | 109,115,906 | 2.63E-02 | 3.39E-03 | 0.653 | 65.306 | 0.847 | 84.746 | 0.179 | 17.902 | 3.580 | 0.129 | 12.940 | 2.588  | 0.298  | 29.847  | 153.10 | --             | Open Sea | Intergenic   |
| dhrt0 | 109,115,965 | 2.63E-02 | 3.39E-03 | 0.473 | 47.273 | 0.741 | 74.138 | 0.295 | 29.529 | 5.906 | 0.121 | 12.132 | 2.426  | 0.269  | 26.865  | 153.10 | --             | Open Sea | Intergenic   |
| dhrt0 | 111,763,172 | 4.49E-02 | 7.98E-06 | 0.696 | 69.565 | 0.863 | 86.275 | 0.202 | 20.191 | 4.038 | 0.104 | 10.377 | 2.075  | 0.167  | 16.709  | 154.10 | --             | Open Sea | Intergenic   |
| dhrt0 | 111,763,292 | 1.84E-02 | 1.84E-06 | 0.696 | 69.565 | 0.863 | 86.275 | 0.202 | 20.191 | 4.038 | 0.104 | 10.377 | 2.075  | 0.167  | 16.709  | 154.10 | --             | Open Sea | Intergenic   |
| dhrt0 | 111,763,295 | 1.11E-02 | 1.46E-07 | 0.192 | 19.231 | 0.414 | 41.379 | 0.099 | 9.900  | 1.980 | 0.127 | 12.694 | 2.539  | 0.221  | 22.149  | 154.10 | --             | Open Sea | Intergenic   |
| dhrt0 | 111,763,324 | 7.92E-03 | 1.46E-07 | 0.196 | 19.565 | 0.444 | 44.444 | 0.116 | 11.643 | 2.329 | 0.147 | 14.724 | 2.945  | 0.249  | 24.879  | 154.10 | --             | Open Sea | Intergenic   |
| dhrt0 | 111,763,340 | 2.07E-02 | 1.46E-07 | 0.357 | 35.714 | 0.647 | 64.706 | 0.221 | 22.080 | 4.416 | 0.264 | 26.369 | 5.274  | 0.290  | 28.992  | 154.10 | --             | Open Sea | Intergenic   |
| dhrt0 | 112,527,819 | 3.02E-02 | 3.02E-02 | 0.777 | 67.742 | 0.407 | 40.741 | 0.221 | 22.180 | 4.496 | 0.099 | 9.900  | 2.075  | -0.200 | -20.000 | 157.10 | --             | Open Sea | Intergenic   |
| dhrt0 | 112,528,226 | 3.66E-02 | 3.66E-02 | 0.672 | 67.213 | 0.864 | 86.406 | 0.185 | 18.534 | 3.707 | 0.087 | 8.689  | 1.738  | 0.191  | 19.151  | 155.10 | --             | Open Sea | Intergenic   |
| dhrt0 | 112,703,980 | 4.94E-02 | 3.93E-02 | 0.429 | 42.857 | 0.720 | 72.000 | 0.314 | 31.403 | 6.281 | 0.212 | 21.213 | 4.243  | 0.291  | 29.143  | 156.10 | --             | Open Sea | Intergenic   |
| dhrt0 | 112,704,170 | 1.84E-02 | 3.04E-02 | 0.486 | 48.571 | 0.778 | 77.778 | 0.141 | 14.082 | 2.816 | 0.244 | 24.370 | 4.874  | 0.292  | 29.206  | 156.10 | --             | Open Sea | Intergenic   |
| dhrt0 | 112,731,987 | 1.12E-02 | 1.73E-05 | 0.278 | 27.778 | 0.278 | 27.778 | 0.144 | 14.431 | 2.816 | 0.114 | 11.351 | 2.270  | 0.245  | 24.531  | 157.10 | CG             | Open Sea | Intergenic   |
| dhrt0 | 112,732,018 | 2.32E-04 | 9.92E-06 | 0.105 | 10.526 | 0.462 | 46.154 | 0.183 | 18.326 | 3.665 | 0.043 | 4.260  | 0.852  | 0.356  | 35.628  | 157.10 | CG             | Open Sea | Intergenic   |
| dhrt0 | 112,768,467 | 2.27E-02 | 8.77E-04 | 0.421 | 42.105 | 0.149 | 14.894 | 0.241 | 24.128 | 4.826 | 0.079 | 7.857  | 1.571  | -0.212 | -21.212 | 158.10 | --             | Open Sea | Intergenic   |
| dhrt0 | 112,768,548 | 8.35E-03 | 8.77E-04 | 0.842 | 84.211 | 0.548 | 54.839 | 0.095 | 9.531  | 1.906 | 0.240 | 23.965 | 4.793  | -0.294 | -29.372 | 158.10 | --             | Open Sea | Intergenic   |
| dhrt0 | 112,985,397 | 2.12E-02 | 2.84E-02 | 0.794 | 79.412 | 0.585 | 58.522 | 0.794 | 79.412 | 6.925 | 0.130 | 13.033 | 2.607  | -0.229 | -22.929 | 159.10 | TA             | Open Sea | Intergenic   |
| dhrt0 | 112,985,533 | 3.95E-02 | 2.84E-02 | 0.714 | 71.429 | 0.919 | 91.892 | 0.206 | 20.578 | 4.116 | 0.089 | 8.879  | 1.776  | 0.205  | 20.463  | 159.10 | TC             | Open Sea | Intergenic   |
| dhrt0 | 113,034,217 | 3.83E-02 | 8.89E-04 | 0.185 | 18.519 | 0.543 | 54.286 | 0.388 | 38.763 | 7.753 | 0.249 | 24.929 | 4.986  | 0.358  | 35.767  | 160.10 | --             | Open Sea | Intergenic   |
| dhrt0 | 113,034,242 | 1.11E-02 | 8.89E-04 | 0.179 | 17.949 | 0.457 | 45.714 | 0.123 | 12.338 | 2.468 | 0.227 | 22.749 | 4.550  | 0.278  | 27.766  | 160.10 | ag             | Open Sea | Intergenic   |
| dhrt0 | 113,034,278 | 1.81E-02 | 8.89E-04 | 0.185 | 18.519 | 0.543 | 54.286 | 0.388 | 38.763 | 7.753 | 0.249 | 24.929 | 4.986  | 0.358  | 35.767  | 160.10 | ag             | Open Sea | Intergenic   |
| dhrt0 | 113,322,487 | 1.36E-02 | 2.60E-01 | 0.316 | 31.579 | 0.538 |        |       |        |       |       |        |        |        |         |        |                |          |              |



|       |            |          |          |       |        |       |        |       |        |       |       |        |       |        |         |        |           |                |              |              |      |
|-------|------------|----------|----------|-------|--------|-------|--------|-------|--------|-------|-------|--------|-------|--------|---------|--------|-----------|----------------|--------------|--------------|------|
| dhrt1 | 3,143,632  | 4.46E-02 | 1.23E-01 | 0.463 | 46.324 | 0.663 | 66.279 | 0.155 | 15.457 | 3.091 | 0.128 | 12.770 | 2.554 | 0.200  | 19.956  | 178.11 | -G        | Open Sea       | Intron 19/32 | SH1          |      |
| dhrt1 | 3,143,632  | 4.46E-02 | 1.23E-01 | 0.463 | 46.324 | 0.663 | 66.279 | 0.155 | 15.457 | 3.091 | 0.128 | 12.770 | 2.554 | 0.200  | 19.956  | 178.11 | -G        | Open Sea       | TSS 1500     | SH1          |      |
| dhrt1 | 3,143,632  | 4.46E-02 | 1.23E-01 | 0.463 | 46.324 | 0.663 | 66.279 | 0.155 | 15.457 | 3.091 | 0.128 | 12.770 | 2.554 | 0.200  | 19.956  | 178.11 | -G        | Open Sea       | Exon 18/32   | SH1          |      |
| dhrt1 | 3,144,267  | 1.60E-02 | 1.80E-02 | 0.700 | 70.000 | 0.871 | 87.097 | 0.083 | 8.267  | 1.653 | 0.059 | 5.869  | 1.174 | 0.171  | 17.097  | 178.11 | CG nearby | Open Sea       | Intron 4/16  | Mtmr3        |      |
| dhrt1 | 3,144,267  | 1.60E-02 | 1.80E-02 | 0.700 | 70.000 | 0.871 | 87.097 | 0.083 | 8.267  | 1.653 | 0.059 | 5.869  | 1.174 | 0.171  | 17.097  | 178.11 | CG nearby | Open Sea       | Intron 6/17  | Mtmr3        |      |
| dhrt1 | 3,144,267  | 1.60E-02 | 1.80E-02 | 0.700 | 70.000 | 0.871 | 87.097 | 0.083 | 8.267  | 1.653 | 0.059 | 5.869  | 1.174 | 0.171  | 17.097  | 178.11 | CG nearby | Open Sea       | Intron 6/17  | Mtmr3        |      |
| dhrt1 | 4,513,231  | 2.74E-02 | 1.09E-02 | 0.167 | 16.667 | 0.486 | 48.649 | 0.205 | 20.501 | 4.100 | 0.205 | 20.525 | 4.105 | 0.320  | 31.982  | 179.11 | --        | Open Sea       | Intron 6/17  | Mtmr3        |      |
| dhrt1 | 4,513,231  | 2.74E-02 | 1.09E-02 | 0.167 | 16.667 | 0.486 | 48.649 | 0.205 | 20.501 | 4.100 | 0.205 | 20.525 | 4.105 | 0.320  | 31.982  | 179.11 | --        | Open Sea       | Intron 4/16  | Mtmr3        |      |
| dhrt1 | 4,513,344  | 3.67E-02 | 5.18E-03 | 0.282 | 28.235 | 0.432 | 43.158 | 0.183 | 18.345 | 3.669 | 0.063 | 6.296  | 1.259 | 0.149  | 14.923  | 179.11 | --        | Open Sea       | Intron 6/17  | Mtmr3        |      |
| dhrt1 | 4,513,344  | 3.67E-02 | 5.18E-03 | 0.282 | 28.235 | 0.432 | 43.158 | 0.183 | 18.345 | 3.669 | 0.063 | 6.296  | 1.259 | 0.149  | 14.923  | 179.11 | --        | Open Sea       | Intron 6/17  | Mtmr3        |      |
| dhrt1 | 4,634,843  | 3.14E-02 | 1.34E-02 | 0.654 | 65.354 | 0.779 | 77.876 | 0.127 | 12.729 | 2.546 | 0.113 | 11.262 | 2.252 | 0.122  | 12.522  | 180.11 | --        | N Shelf        | Intergenic   |              |      |
| dhrt1 | 4,634,400  | 2.44E-03 | 1.34E-02 | 0.509 | 50.862 | 0.734 | 73.394 | 0.064 | 6.440  | 1.288 | 0.123 | 12.251 | 2.450 | 0.225  | 22.532  | 180.11 | --        | N Shelf        | Intergenic   |              |      |
| dhrt1 | 6,521,155  | 1.44E-02 | 6.64E-02 | 0.880 | 88.000 | 0.638 | 63.830 | 0.186 | 18.602 | 3.720 | 0.170 | 17.027 | 3.405 | -0.242 | -24.170 | 181.11 | --        | Open Sea       | TSS 200      | Myo1g        |      |
| dhrt1 | 6,521,225  | 3.69E-02 | 2.71E-03 | 0.791 | 79.114 | 0.660 | 66.049 | 0.251 | 25.081 | 5.016 | 0.195 | 19.475 | 3.895 | -0.131 | -13.065 | 181.11 | --        | Open Sea       | TSS 1500     | Myo1g        |      |
| dhrt1 | 7,271,417  | 8.30E-03 | 1.31E-03 | 0.567 | 56.667 | 0.796 | 79.630 | 0.177 | 17.720 | 3.544 | 0.141 | 14.138 | 2.828 | 0.230  | 22.963  | 182.11 | --        | Open Sea       | Intergenic   |              |      |
| dhrt1 | 7,271,726  | 2.58E-02 | 1.60E-01 | 0.148 | 14.754 | 0.333 | 33.333 | 0.101 | 10.133 | 2.027 | 0.196 | 19.558 | 3.912 | 0.186  | 18.579  | 182.11 | --        | Open Sea       | Intergenic   |              |      |
| dhrt1 | 7,730,850  | 1.97E-02 | 9.48E-02 | 0.887 | 88.660 | 0.756 | 75.581 | 0.062 | 6.184  | 1.237 | 0.171 | 17.149 | 3.430 | -0.131 | -13.078 | 183.11 | --        | Open Sea       | Intergenic   |              |      |
| dhrt1 | 7,731,006  | 3.69E-02 | 1.42E-02 | 0.706 | 70.588 | 0.670 | 67.037 | 0.270 | 27.037 | 6.541 | 0.080 | 8.045  | 1.609 | 0.164  | 16.449  | 183.11 | --        | Open Sea       | Intergenic   |              |      |
| dhrt1 | 7,911,679  | 3.18E-02 | 3.80E-02 | 0.638 | 63.830 | 0.857 | 85.714 | 0.215 | 21.548 | 4.310 | 0.108 | 10.817 | 2.163 | 0.219  | 21.884  | 184.11 | GA        | Open Sea       | Intergenic   |              |      |
| dhrt1 | 7,911,779  | 4.06E-02 | 3.80E-02 | 0.655 | 65.517 | 0.885 | 88.462 | 0.200 | 19.951 | 3.990 | 0.093 | 9.283  | 1.857 | 0.229  | 22.944  | 184.11 | --        | CG nearby      | Open Sea     | Intergenic   |      |
| dhrt1 | 14,459,253 | 4.43E-02 | 6.28E-02 | 0.536 | 53.623 | 0.694 | 69.412 | 0.252 | 25.215 | 5.043 | 0.113 | 11.332 | 2.266 | 0.158  | 15.789  | 185.11 | --        | Open Sea       | Intergenic   |              |      |
| dhrt1 | 15,676,254 | 2.55E-02 | 4.40E-01 | 0.806 | 80.556 | 0.614 | 61.446 | 0.114 | 11.368 | 2.274 | 0.102 | 10.166 | 2.033 | -0.191 | -19.110 | 186.11 | --        | Open Sea       | Intergenic   |              |      |
| dhrt1 | 15,676,777 | 3.67E-02 | 9.11E-04 | 0.605 | 60.526 | 0.837 | 83.673 | 0.287 | 28.651 | 5.730 | 0.217 | 21.654 | 4.331 | 0.231  | 23.147  | 186.11 | --        | Open Sea       | Intergenic   |              |      |
| dhrt1 | 15,676,970 | 3.10E-02 | 9.11E-04 | 0.690 | 69.046 | 0.873 | 87.273 | 0.142 | 14.236 | 3.847 | 0.085 | 8.518  | 1.704 | 0.182  | 18.225  | 186.11 | --        | Open Sea       | Intergenic   |              |      |
| dhrt1 | 15,676,977 | 2.67E-02 | 9.11E-04 | 0.614 | 61.351 | 0.773 | 77.778 | 0.273 | 27.462 | 4.402 | 0.236 | 23.587 | 4.717 | 0.264  | 26.422  | 186.11 | --        | Open Sea       | Intergenic   |              |      |
| dhrt1 | 15,773,271 | 4.93E-02 | 3.56E-02 | 0.450 | 45.000 | 0.767 | 76.667 | 0.336 | 33.600 | 2.820 | 0.250 | 25.000 | 5.000 | 0.317  | 31.667  | 187.11 | aa        | Open Sea       | Intergenic   |              |      |
| dhrt1 | 15,773,667 | 3.36E-02 | 3.36E-02 | 0.689 | 68.888 | 0.547 | 54.717 | 0.154 | 15.423 | 3.085 | 0.139 | 13.913 | 2.783 | -0.142 | -14.151 | 187.11 | --        | Open Sea       | Intergenic   |              |      |
| dhrt1 | 21,739,356 | 1.65E-02 | 1.59E-02 | 0.144 | 14.365 | 0.385 | 38.562 | 0.136 | 13.469 | 2.133 | 0.245 | 24.525 | 4.385 | -0.211 | -21.377 | 188.11 | --        | Check manually | Open Sea     | Intergenic   |      |
| dhrt1 | 21,739,365 | 3.06E-02 | 1.59E-03 | 0.130 | 13.043 | 0.283 | 28.333 | 0.100 | 10.023 | 2.005 | 0.193 | 19.255 | 3.851 | -0.153 | -15.290 | 188.11 | --        | Check manually | Open Sea     | Intron 12/17 | Wdcp |
| dhrt1 | 26,308,542 | 4.87E-02 | 6.17E-04 | 0.517 | 51.724 | 0.767 | 76.667 | 0.252 | 25.210 | 5.042 | 0.257 | 25.695 | 5.139 | 0.249  | 24.943  | 189.11 | AC        | Open Sea       | Intergenic   |              |      |
| dhrt1 | 26,308,701 | 2.81E-02 | 6.17E-04 | 0.713 | 71.296 | 0.845 | 84.524 | 0.184 | 18.405 | 3.681 | 0.049 | 4.881  | 0.976 | 0.132  | 13.228  | 189.11 | GA        | Open Sea       | Intergenic   |              |      |
| dhrt1 | 26,308,731 | 1.06E-02 | 6.17E-04 | 0.614 | 61.351 | 0.086 | 8.613  | 0.086 | 8.613  | 1.767 | 0.113 | 11.347 | 2.269 | 0.189  | 18.911  | 189.11 | CT        | Open Sea       | Intergenic   |              |      |
| dhrt1 | 27,075,499 | 1.59E-02 | 1.08E-02 | 0.227 | 22.727 | 0.476 | 47.619 | 0.149 | 14.900 | 2.980 | 0.187 | 18.725 | 3.745 | 0.249  | 24.892  | 190.11 | --        | Check manually | Open Sea     | Intergenic   |      |
| dhrt1 | 27,075,499 | 1.54E-02 | 5.37E-03 | 0.222 | 22.222 | 0.459 | 45.902 | 0.211 | 21.148 | 4.230 | 0.158 | 15.790 | 3.158 | 0.237  | 23.679  | 190.11 | -a        | Open Sea       | Intergenic   |              |      |
| dhrt1 | 34,506,005 | 7.19E-03 | 4.31E-02 | 0.718 | 71.765 | 0.883 | 88.298 | 0.163 | 16.335 | 3.267 | 0.065 | 6.465  | 1.293 | -0.165 | -16.533 | 191.11 | tg        | Open Sea       | Intron 23/51 | Dock2        |      |
| dhrt1 | 34,506,163 | 4.31E-02 | 2.03E-02 | 0.753 | 75.301 | 0.763 | 76.301 | 0.292 | 29.292 | 6.753 | 0.154 | 15.436 | 3.087 | -0.189 | -18.911 | 191.11 | TA        | Open Sea       | Intergenic   |              |      |
| dhrt1 | 36,653,033 | 4.22E-02 | 2.03E-02 | 0.889 | 88.889 | 0.729 | 72.941 | 0.087 | 8.682  | 1.736 | 0.154 | 15.436 | 3.087 | -0.169 | -16.533 | 192.11 | IT        | Open Sea       | Intron 4/30  | Tenn2        |      |
| dhrt1 | 36,653,160 | 1.77E-02 | 4.95E-04 | 0.863 | 86.290 | 0.746 | 74.627 | 0.084 | 8.406  | 1.681 | 0.097 | 9.671  | 1.934 | -0.117 | -11.663 | 192.11 | TG        | Open Sea       | Intergenic   |              |      |
| dhrt1 | 36,880,572 | 2.78E-03 | 2.78E-03 | 0.409 | 40.909 | 0.833 | 83.333 | 0.374 | 37.702 | 6.340 | 0.150 | 14.965 | 2.993 | 0.424  | 42.424  | 193.11 | --        | Open Sea       | Intergenic   |              |      |
| dhrt1 | 38,801,569 | 1.20E-02 | 1.20E-02 | 0.689 | 68.944 | 0.894 | 89.444 | 0.121 | 12.062 | 2.412 | 0.238 | 23.812 | 4.243 | -0.143 | -14.310 | 193.11 | --        | Open Sea       | Intergenic   |              |      |
| dhrt1 | 38,882,767 | 2.09E-02 | 2.87E-03 | 0.836 | 83.562 | 0.674 | 67.442 | 0.121 | 12.073 | 2.415 | 0.269 | 26.863 | 5.773 | -0.161 | -16.120 | 194.11 | --        | Open Sea       | Intergenic   |              |      |
| dhrt1 | 38,882,780 | 1.86E-02 | 2.87E-03 | 0.847 | 84.722 | 0.630 | 62.963 | 0.102 | 10.239 | 2.048 | 0.136 | 13.552 | 2.170 | -0.218 | -21.759 | 194.11 | --        | Open Sea       | Intergenic   |              |      |
| dhrt1 | 39,719,882 | 1.42E-02 | 9.64E-03 | 0.360 | 36.000 | 0.694 | 69.444 | 0.169 | 16.897 | 3.379 | 0.198 | 19.783 | 3.957 | 0.334  | 33.444  | 195.11 | TA        | Open Sea       | Intergenic   |              |      |
| dhrt1 | 39,719,895 | 9.64E-03 | 9.64E-03 | 0.361 | 36.095 | 0.710 | 71.068 | 0.161 | 16.091 | 3.264 | 0.201 | 20.061 | 3.987 | 0.329  | 32.873  | 195.11 | TG        | Open Sea       | Intergenic   |              |      |
| dhrt1 | 42,346,135 | 1.11E-02 | 1.13E-02 | 0.139 | 13.924 | 0.328 | 32.787 | 0.086 | 8.612  | 1.722 | 0.166 | 16.599 | 3.320 | 0.189  | 18.863  | 196.11 | --        | Open Sea       | Intergenic   |              |      |
| dhrt1 | 42,346,283 | 1.66E-02 | 9.31E-04 | 0.200 | 20.000 | 0.367 | 36.709 | 0.100 | 10.004 | 2.001 | 0.182 | 18.182 | 3.636 | 0.167  | 16.709  | 196.11 | --        | Open Sea       | Intergenic   |              |      |
| dhrt1 | 50,370,912 | 2.01E-02 | 7.69E-02 | 0.324 | 32.432 | 0.590 | 59.974 | 0.214 | 21.426 | 4.285 | 0.271 | 27.146 | 5.429 | 0.285  | 26.542  | 197.11 | --        | Open Sea       | Intergenic   |              |      |
| dhrt1 | 50,370,936 | 3.61E-02 | 3.61E-02 | 0.200 | 20.000 | 0.647 | 64.706 | 0.233 | 23.253 | 4.651 | 0.389 | 38.906 | 7.781 | 0.397  | 39.703  | 197.11 | --        | Open Sea       | Intergenic   |              |      |
| dhrt1 | 63,435,222 | 4.80E-02 | 4.80E-02 | 0.902 | 90.217 | 0.800 | 80.000 | 0.111 | 11.121 | 2.224 | 0.033 | 3.344  | 0.669 | -0.102 | -10.217 | 198.11 | --        | Open Sea       | Intergenic   |              |      |
| dhrt1 | 63,435,803 | 3.22E-02 | 3.97E-01 | 0.750 | 75.000 | 0.542 | 54.167 | 0.211 | 21.063 | 4.213 | 0.260 | 26.019 | 5.204 | -0.208 | -20.833 | 198.11 | tt        | Open Sea       | Intergenic   |              |      |
| dhrt1 | 69,121,314 | 3.00E-02 | 5.58E-03 | 0.615 | 61.538 | 0.333 | 33.333 | 0.209 | 20.917 | 4.183 | 0.158 | 15.756 | 3.151 | -0.282 | -28.205 | 199.11 | CG        | N Shore        | Intergenic   |              |      |
| dhrt1 | 69,121,328 | 3.95E-02 | 2.45E-03 | 0.423 | 42.308 | 0.412 | 41.208 | 0.255 | 25.505 | 4.113 | 0.213 | 21.276 | 4.051 | -0.251 | -25.065 | 199.11 | TG        | Open Sea       | Intergenic   |              |      |
| dhrt1 | 73,991,296 | 4.05E-02 | 1.12E-01 | 0.606 | 60.606 | 0.463 | 46.296 | 0.098 | 9.785  | 1.957 | 0.162 | 16.234 | 3.247 | -0.143 | -14.310 | 201.11 | --        | Open Sea       | Intergenic   |              |      |
| dhrt1 | 73,992,116 | 1.68E-02 | 3.75E-02 | 0.483 | 48.276 | 0.756 | 75.556 | 0.286 | 28.614 | 5.723 | 0.176 | 17.614 | 3.523 | 0.273  | 27.280  | 201.11 | --        | Open Sea       | Intergenic   |              |      |
| dhrt1 | 75,067,851 | 1.68E-02 | 2.30E-04 | 0.436 | 43.636 | 0.600 | 60.000 | 0.120 | 11.977 | 2.395 | 0.086 | 8.606  | 1.721 | 0.164  | 16.364  | 201.11 | --        | Open Sea       | Intron 13/18 | Smg6         |      |
| dhrt1 | 75,067,851 | 2.30E-04 | 2.30E-04 | 0.436 | 43.636 | 0.600 | 60.000 | 0.120 | 11.977 | 2.395 | 0.086 | 8.606  | 1.721 | 0.164  | 16.364  | 201.11 | --        | Open Sea       | Intron 4/4   | Smg6         |      |
| dhrt1 | 75,067,857 | 3.06E-03 | 2.30E-04 | 0.374 | 37.383 | 0.579 | 57.944 | 0.138 | 13.809 | 2.762 | 0.083 | 8.269  | 1.654 | 0.206  | 20.561  | 201.11 | --        | Open Sea       | Intron 13/18 | Smg6         |      |
| dhrt1 | 75,067,857 | 3.06E-03 |          |       |        |       |        |       |        |       |       |        |       |        |         |        |           |                |              |              |      |



|        |            |           |           |       |        |       |        |       |        |       |       |        |       |        |         |         |                |          |              |
|--------|------------|-----------|-----------|-------|--------|-------|--------|-------|--------|-------|-------|--------|-------|--------|---------|---------|----------------|----------|--------------|
| chrt12 | 7,969,252  | 1.67E-02  | 7.22E-02  | 0.217 | 21.739 | 0.435 | 43.548 | 0.109 | 10.918 | 2.184 | 0.158 | 15.777 | 3.155 | 0.218  | 21.809  | 222.12  | --             | Open Sea | Intergenic   |
| chrt12 | 7,969,339  | 2.24E-03  | 7.22E-02  | 0.222 | 22,222 | 0.551 | 55.072 | 0.119 | 11.877 | 2.375 | 0.207 | 20.695 | 4.139 | 0.329  | 32.850  | 222.12  | --             | Open Sea | Intergenic   |
| chrt12 | 9,794,520  | 2.879E-02 | 2.879E-02 | 0.656 | 65.628 | 0.656 | 65.628 | 0.203 | 20.340 | 5.067 | 0.203 | 5.067  | 0.466 | 0.340  | 3.461   | -28.125 | 12             | Open Sea | Intergenic   |
| chrt12 | 9,795,187  | 2.88E-02  | 5.54E-02  | 0.823 | 82.270 | 0.714 | 71.429 | 0.054 | 5.377  | 1.075 | 0.042 | 4.192  | 0.838 | -0.108 | -10.841 | 223.12  | --             | Open Sea | Intergenic   |
| chrt12 | 10,086,594 | 4.98E-02  | 1.56E-01  | 0.822 | 82.222 | 0.634 | 63.415 | 0.125 | 12.459 | 2.492 | 0.234 | 23.376 | 4.675 | -0.188 | -18.808 | 224.12  | 12             | Open Sea | Intergenic   |
| chrt12 | 10,087,261 | 1.84E-02  | 1.84E-02  | 0.600 | 60.000 | 0.800 | 80.000 | 0.069 | 6.890  | 1.378 | 0.117 | 11.748 | 2.350 | 0.200  | 20.000  | 224.12  | CA             | Open Sea | Intergenic   |
| chrt12 | 11,010,624 | 4.27E-02  | 1.04E-02  | 0.596 | 59.647 | 0.596 | 59.647 | 0.042 | 4.249  | 0.141 | 0.139 | 1.413  | 1.139 | 0.194  | 19.373  | 225.12  | 12             | Open Sea | Intergenic   |
| chrt12 | 11,010,877 | 3.66E-02  | 1.04E-02  | 0.313 | 31.250 | 0.578 | 57.778 | 0.244 | 24.421 | 4.884 | 0.132 | 13.243 | 2.649 | 0.265  | 26.528  | 225.12  | ag             | Open Sea | Intergenic   |
| chrt12 | 11,313,336 | 2.75E-02  | 9.61E-03  | 0.540 | 54.000 | 0.814 | 81.395 | 0.232 | 23.193 | 4.639 | 0.152 | 15.230 | 3.046 | 0.274  | 27.395  | 226.12  | --             | Open Sea | Intron 24/26 |
| chrt12 | 11,313,336 | 2.75E-02  | 9.61E-03  | 0.540 | 54.000 | 0.814 | 81.395 | 0.232 | 23.193 | 4.639 | 0.152 | 15.230 | 3.046 | 0.274  | 27.395  | 226.12  | --             | Open Sea | Intron 23/25 |
| chrt12 | 11,313,353 | 9.81E-03  | 0.62E-03  | 0.625 | 62.500 | 0.821 | 82.051 | 0.099 | 9.919  | 1.984 | 0.181 | 18.089 | 3.618 | 0.196  | 19.551  | 226.12  | --             | Open Sea | Intron 24/26 |
| chrt12 | 11,313,353 | 4.19E-02  | 9.61E-03  | 0.625 | 62.500 | 0.821 | 82.051 | 0.099 | 9.919  | 1.984 | 0.181 | 18.089 | 3.618 | 0.196  | 19.551  | 226.12  | --             | Open Sea | Intron 23/25 |
| chrt12 | 12,471,157 | 3.92E-02  | 1.60E-03  | 0.500 | 50.000 | 0.781 | 78.125 | 0.236 | 23.623 | 4.725 | 0.149 | 14.879 | 2.976 | 0.281  | 28.125  | 227.12  | --             | Open Sea | Intergenic   |
| chrt12 | 12,471,294 | 4.43E-02  | 1.38E-01  | 0.750 | 75.000 | 0.867 | 86.667 | 0.081 | 8.088  | 1.618 | 0.101 | 10.077 | 2.015 | 0.117  | 11.867  | 227.12  | --             | Open Sea | Intergenic   |
| chrt12 | 14,947,599 | 1.35E-02  | 4.65E-03  | 0.400 | 40.000 | 0.731 | 73.077 | 0.224 | 22.418 | 4.484 | 0.163 | 16.328 | 3.665 | 0.331  | 33.077  | 228.12  | --             | Open Sea | Intergenic   |
| chrt12 | 14,947,617 | 7.31E-03  | 4.65E-03  | 0.576 | 57.576 | 0.889 | 88.889 | 0.279 | 27.866 | 5.573 | 0.206 | 20.558 | 4.112 | 0.313  | 31.313  | 228.12  | --             | Open Sea | Intergenic   |
| chrt12 | 16,965,164 | 2.57E-03  | 6.79E-03  | 0.217 | 21.739 | 0.571 | 57.143 | 0.129 | 12.869 | 2.574 | 0.194 | 19.398 | 3.880 | 0.354  | 35.404  | 229.12  | TG             | Open Sea | Exon 19/33   |
| chrt12 | 16,965,230 | 4.04E-02  | 6.24E-03  | 0.458 | 45.763 | 0.655 | 65.455 | 0.252 | 25.159 | 5.832 | 0.128 | 18.136 | 3.627 | 0.197  | 19.692  | 229.12  | TG             | Open Sea | Intron 19/32 |
| chrt12 | 18,445,403 | 4.83E-02  | 1.68E-01  | 0.643 | 64.286 | 0.875 | 87.500 | 0.207 | 20.696 | 4.139 | 0.108 | 10.830 | 2.166 | 0.232  | 22.214  | 230.12  | --             | Open Sea | Intergenic   |
| chrt12 | 18,445,462 | 3.94E-02  | 1.68E-01  | 0.292 | 29.167 | 0.591 | 59.091 | 0.185 | 18.513 | 3.703 | 0.266 | 26.613 | 5.323 | 0.299  | 29.924  | 230.12  | --             | Open Sea | Intergenic   |
| chrt12 | 24,172,203 | 1.36E-02  | 7.40E-03  | 0.583 | 58.333 | 0.889 | 88.889 | 0.363 | 36.276 | 7.255 | 0.205 | 20.501 | 4.100 | 0.306  | 30.556  | 231.12  | --             | Open Sea | Intergenic   |
| chrt12 | 24,172,235 | 4.20E-02  | 7.10E-03  | 0.643 | 64.286 | 0.370 | 37.037 | 0.368 | 36.819 | 7.364 | 0.364 | 36.376 | 7.275 | -0.272 | -27.249 | 231.12  | --             | Open Sea | Intergenic   |
| chrt12 | 28,413,696 | 2.73E-02  | 3.09E-03  | 0.881 | 88.136 | 0.730 | 72.973 | 0.072 | 7.219  | 1.444 | 0.083 | 8.300  | 1.660 | -0.152 | -15.163 | 232.12  | --             | Open Sea | Intergenic   |
| chrt12 | 28,413,732 | 2.20E-02  | 1.62E-03  | 0.769 | 76.923 | 0.606 | 60.577 | 0.112 | 11.185 | 2.237 | 0.106 | 10.592 | 2.118 | -0.163 | -16.346 | 232.12  | --             | Open Sea | Intergenic   |
| chrt12 | 31,156,087 | 3.96E-02  | 7.37E-03  | 0.683 | 68.333 | 0.857 | 85.714 | 0.183 | 18.331 | 3.666 | 0.122 | 12.220 | 2.444 | 0.174  | 17.381  | 233.12  | AA             | Open Sea | Intergenic   |
| chrt12 | 31,156,122 | 4.60E-02  | 3.80E-02  | 0.366 | 36.585 | 0.615 | 61.538 | 0.233 | 23.283 | 4.657 | 0.238 | 23.796 | 4.757 | 0.243  | 24.363  | 233.12  | CG nearby      | Open Sea | Intergenic   |
| chrt12 | 33,717,175 | 4.59E-02  | 4.68E-02  | 0.593 | 59.259 | 0.593 | 59.259 | 0.285 | 28.552 | 4.170 | 0.181 | 18.089 | 3.618 | 0.196  | 19.551  | 234.12  | AA             | Open Sea | Intergenic   |
| chrt12 | 33,717,687 | 3.33E-02  | 1.92E-01  | 0.333 | 33.333 | 0.655 | 65.517 | 0.267 | 26.715 | 5.343 | 0.180 | 18.014 | 3.603 | 0.322  | 32.184  | 234.12  | CA             | Open Sea | Intergenic   |
| chrt12 | 33,717,717 | 9.13E-03  | 1.92E-01  | 0.182 | 18.182 | 0.625 | 62.500 | 0.207 | 20.736 | 4.147 | 0.298 | 29.814 | 5.963 | 0.443  | 44.318  | 235.12  | CG             | Open Sea | Intergenic   |
| chrt12 | 36,305,146 | 7.15E-03  | 2.23E-03  | 0.451 | 45.100 | 0.791 | 79.100 | 0.295 | 29.545 | 5.905 | 0.131 | 13.095 | 3.131 | 0.206  | 20.606  | 235.12  | CG             | Open Sea | Intergenic   |
| chrt12 | 36,305,146 | 6.20E-03  | 2.23E-03  | 0.229 | 22.917 | 0.483 | 48.333 | 0.382 | 38.179 | 7.636 | 0.044 | 4.391  | 0.878 | 0.255  | 25.417  | 235.12  | 12             | Open Sea | Intergenic   |
| chrt12 | 36,511,031 | 3.84E-02  | 3.54E-03  | 0.364 | 36.364 | 0.667 | 66.667 | 0.242 | 24.250 | 4.850 | 0.183 | 18.273 | 3.655 | 0.303  | 30.303  | 236.12  | TA             | Open Sea | Intron 6/9   |
| chrt12 | 36,511,129 | 2.71E-03  | 6.97E-05  | 0.343 | 34.286 | 0.716 | 71.622 | 0.121 | 12.060 | 2.412 | 0.184 | 18.411 | 3.682 | 0.373  | 37.336  | 236.12  | TA             | Open Sea | Intron 6/9   |
| chrt12 | 37,631,569 | 4.04E-03  | 4.62E-03  | 0.673 | 67.333 | 0.857 | 85.714 | 0.233 | 23.283 | 4.657 | 0.238 | 23.796 | 4.757 | 0.243  | 24.363  | 237.12  | TA             | Open Sea | Intron 2/3   |
| chrt12 | 37,631,600 | 2.86E-02  | 2.93E-03  | 0.818 | 81.818 | 0.630 | 62.963 | 0.153 | 15.323 | 3.065 | 0.150 | 15.006 | 3.001 | -0.169 | -16.855 | 237.12  | GG             | Open Sea | Intergenic   |
| chrt12 | 40,450,015 | 4.66E-02  | 5.32E-02  | 0.851 | 85.106 | 0.735 | 73.469 | 0.180 | 18.026 | 3.605 | 0.043 | 4.275  | 0.855 | -0.101 | -10.167 | 238.12  | --             | Open Sea | S Shelf      |
| chrt12 | 40,450,127 | 4.90E-02  | 9.57E-03  | 0.818 | 81.818 | 0.682 | 68.235 | 0.096 | 9.573  | 1.915 | 0.118 | 11.769 | 2.354 | -0.136 | -13.583 | 238.12  | CA             | Open Sea | Intron 1/52  |
| chrt12 | 42,511,080 | 5.04E-02  | 3.65E-02  | 0.673 | 67.333 | 0.519 | 51.900 | 0.072 | 7.166  | 1.554 | 0.066 | 6.640  | 1.171 | 0.093  | 10.333  | 239.12  | gg             | Open Sea | Intergenic   |
| chrt12 | 42,511,567 | 2.45E-02  | 2.45E-02  | 0.545 | 54.545 | 0.833 | 83.333 | 0.266 | 26.572 | 5.314 | 0.140 | 13.964 | 2.793 | 0.298  | 29.788  | 239.12  | --             | Open Sea | Intergenic   |
| chrt12 | 43,362,169 | 2.59E-02  | 1.93E-01  | 0.771 | 77.108 | 0.900 | 90.000 | 0.128 | 12.755 | 2.551 | 0.131 | 1.345  | 0.269 | 0.129  | 12.892  | 240.12  | --             | Open Sea | Intergenic   |
| chrt12 | 43,362,532 | 2.57E-02  | 5.39E-01  | 0.367 | 36.667 | 0.656 | 65.625 | 0.379 | 37.268 | 7.454 | 0.139 | 13.890 | 2.778 | 0.290  | 28.958  | 240.12  | --             | Open Sea | Intergenic   |
| chrt12 | 46,494,458 | 1.38E-02  | 5.99E-05  | 0.400 | 40.000 | 0.773 | 77.273 | 0.189 | 18.926 | 3.785 | 0.167 | 16.742 | 3.348 | 0.373  | 37.273  | 241.12  | Check manually | Open Sea | Intergenic   |
| chrt12 | 47,308,159 | 2.92E-02  | 2.92E-02  | 0.699 | 69.939 | 0.808 | 80.822 | 0.137 | 13.723 | 2.745 | 0.065 | 6.470  | 1.294 | 0.109  | 10.883  | 242.12  | --             | Open Sea | Intergenic   |
| chrt12 | 47,308,860 | 4.60E-02  | 9.37E-02  | 0.732 | 73.214 | 0.542 | 54.167 | 0.182 | 18.166 | 3.633 | 0.166 | 16.564 | 3.313 | -0.190 | -19.048 | 242.12  | --             | Open Sea | Intergenic   |
| chrt12 | 47,536,632 | 3.43E-02  | 3.43E-02  | 0.474 | 47.403 | 0.634 | 63.472 | 0.099 | 9.972  | 1.869 | 0.106 | 11.063 | 2.472 | 0.238  | 23.814  | 243.12  | CG nearby      | Open Sea | Intergenic   |
| chrt12 | 47,537,449 | 2.11E-02  | 2.11E-02  | 0.821 | 82.143 | 0.522 | 52.174 | 0.119 | 11.857 | 2.371 | 0.289 | 28.918 | 5.784 | -0.300 | -29.969 | 243.12  | --             | Open Sea | Intergenic   |
| chrt12 | 47,689,879 | 2.08E-02  | 2.08E-02  | 0.517 | 51.667 | 0.716 | 71.591 | 0.124 | 12.426 | 2.485 | 0.151 | 15.116 | 3.023 | 0.199  | 19.924  | 244.12  | --             | Open Sea | Intergenic   |
| chrt12 | 47,670,813 | 1.27E-02  | 4.82E-02  | 0.573 | 57.282 | 0.736 | 73.636 | 0.163 | 16.322 | 3.264 | 0.091 | 9.051  | 1.810 | 0.164  | 16.355  | 244.12  | --             | Open Sea | Intergenic   |
| chrt12 | 48,083,412 | 3.07E-02  | 5.11E-03  | 0.571 | 57.143 | 0.333 | 33.333 | 0.219 | 21.924 | 4.385 | 0.134 | 13.260 | 2.472 | -0.238 | -23.814 | 245.12  | AA             | Open Sea | Intergenic   |
| chrt12 | 48,083,487 | 3.70E-02  | 1.54E-03  | 0.705 | 70.455 | 0.900 | 90.000 | 0.172 | 17.165 | 3.433 | 0.088 | 8.768  | 1.754 | 0.195  | 19.545  | 245.12  | CG nearby      | Open Sea | Intergenic   |
| chrt12 | 48,584,740 | 2.70E-02  | 1.28E-02  | 0.595 | 59.459 | 0.829 | 82.857 | 0.191 | 19.089 | 3.818 | 0.142 | 14.216 | 2.843 | 0.234  | 23.398  | 246.12  | TG             | Open Sea | Intergenic   |
| chrt12 | 48,585,052 | 2.51E-02  | 2.51E-02  | 0.651 | 65.116 | 0.875 | 87.500 | 0.336 | 33.619 | 6.724 | 0.130 | 12.990 | 2.598 | 0.224  | 22.384  | 246.12  | CA             | Open Sea | Intergenic   |
| chrt12 | 48,729,418 | 1.58E-02  | 1.53E-02  | 0.353 | 35.294 | 0.650 | 65.000 | 0.195 | 19.538 | 3.058 | 0.135 | 13.538 | 2.708 | 0.307  | 30.667  | 247.12  | --             | Open Sea | Intergenic   |
| chrt12 | 48,730,148 | 1.73E-02  | 7.26E-04  | 0.300 | 30.000 | 0.850 | 85.000 | 0.328 | 32.819 | 6.564 | 0.164 | 16.402 | 3.280 | 0.250  | 25.000  | 247.12  | AT             | Open Sea | Intergenic   |
| chrt12 | 49,659,639 | 7.14E-03  | 9.34E-03  | 0.769 | 76.923 | 0.459 | 45.946 | 0.184 | 18.407 | 3.681 | 0.130 | 12.955 | 2.591 | -0.310 | -30.977 | 248.12  | --             | Open Sea | Intergenic   |
| chrt12 | 49,660,009 | 2.17E-02  | 3.40E-03  | 0.429 | 42.857 | 0.661 | 66.071 | 0.097 | 9.717  | 1.943 | 0.212 | 21.236 | 4.247 | 0.232  | 23.214  | 248.12  | --             | Open Sea | Intergenic   |
| chrt12 | 50,660,091 | 3.40E-02  | 3.40E-02  | 0.320 | 32.000 | 0.650 | 65.000 | 0.162 | 16.245 | 3.162 | 0.162 | 1.640  | 1.625 | 0.199  | 19.852  | 248.12  | --             | Open Sea | Intergenic   |
| chrt12 | 50,666,555 | 3.18E-02  | 1.35E-03  | 0.381 | 38.095 | 0.571 | 57.143 | 0.119 | 11.892 | 2.378 | 0.209 | 20.871 | 4.174 | 0.190  | 19.048  | 249.12  | --             | Open Sea | CG nearby    |
| chrt12 | 50,666,578 | 1.31E-02  | 1.35E-03  | 0.446 | 44.643 | 0.686 | 68.627 | 0.089 | 8.904  | 1.781 | 0.132 | 13     |       |        |         |         |                |          |              |



|        |             |          |          |       |        |       |        |       |        |       |       |        |       |        |         |        |                |          |                  |         |
|--------|-------------|----------|----------|-------|--------|-------|--------|-------|--------|-------|-------|--------|-------|--------|---------|--------|----------------|----------|------------------|---------|
| dhrt12 | 81,113,047  | 2.13E-02 | 5.41E-03 | 0.870 | 86.957 | 0.683 | 68.293 | 0.093 | 9.265  | 1.853 | 0.128 | 12.775 | 2.555 | -0.187 | -18.664 | 270.12 | gg             | Open Sea | Intron 3/12      | Smoc1   |
| dhrt12 | 81,113,461  | 2.42E-02 | 1.33E-01 | 0.159 | 15.909 | 0.509 | 50.943 | 0.398 | 39.794 | 7.959 | 0.233 | 23.276 | 4.655 | -0.350 | -35.034 | 270.12 | --             | Open Sea | Intron 3/12      | Smoc1   |
| dhrt12 | 81,113,461  | 1.33E-01 | 0.159    | 0.159 | 15.909 | 0.509 | 50.943 | 0.398 | 39.794 | 7.959 | 0.233 | 23.276 | 4.655 | -0.350 | -35.034 | 270.12 | --             | Open Sea | Intron 3/12      | Smoc1   |
| dhrt12 | 94,421,285  | 4.49E-03 | 7.06E-01 | 0.720 | 72.000 | 0.296 | 29.630 | 0.178 | 17.823 | 3.565 | 0.381 | 38.091 | 7.618 | -0.424 | -42.370 | 271.12 | AT             | Open Sea | Intergenic       |         |
| dhrt12 | 94,422,162  | 1.98E-02 | 6.19E-01 | 0.548 | 54.800 | 0.789 | 78.947 | 0.318 | 31.822 | 6.364 | 0.100 | 9.973  | 1.995 | 0.242  | 24.185  | 271.12 | AG             | Open Sea | Intergenic       |         |
| dhrt12 | 94,447,572  | 4.16E-03 | 1.13E-04 | 0.192 | 19.231 | 0.600 | 60.000 | 0.151 | 15.074 | 3.015 | 0.216 | 21.807 | 4.361 | 0.408  | 40.769  | 272.12 | --             | Open Sea | Intergenic       |         |
| dhrt12 | 94,447,614  | 3.89E-04 | 1.13E-04 | 0.060 | 6.060  | 0.389 | 38.943 | 0.268 | 26.847 | 7.763 | 0.167 | 16.733 | 3.387 | 0.450  | 45.000  | 272.12 | --             | Open Sea | Intergenic       |         |
| dhrt12 | 94,891,325  | 3.39E-02 | 5.76E-03 | 0.277 | 27.660 | 0.516 | 51.613 | 0.180 | 17.982 | 3.598 | 0.308 | 30.782 | 6.156 | 0.240  | 23.953  | 273.12 | --             | Open Sea | Intergenic       |         |
| dhrt12 | 94,891,338  | 1.98E-02 | 5.76E-03 | 0.275 | 27.451 | 0.528 | 52.778 | 0.181 | 18.066 | 3.613 | 0.203 | 20.320 | 4.064 | 0.253  | 25.327  | 273.12 | --             | Open Sea | Intergenic       |         |
| dhrt12 | 95,853,880  | 1.62E-02 | 3.04E-04 | 0.188 | 18.841 | 0.375 | 37.500 | 0.275 | 27.495 | 5.499 | 0.287 | 28.724 | 5.745 | 0.187  | 18.659  | 274.12 | --             | Open Sea | Intergenic       |         |
| dhrt12 | 95,854,026  | 3.04E-02 | 3.04E-04 | 0.387 | 38.700 | 0.682 | 68.200 | 0.387 | 38.700 | 5.499 | 0.287 | 28.724 | 5.745 | 0.187  | 18.659  | 274.12 | --             | Open Sea | Intergenic       |         |
| dhrt12 | 95,897,621  | 2.37E-02 | 2.37E-02 | 0.742 | 74.194 | 0.875 | 87.736 | 0.242 | 4.208  | 0.842 | 0.136 | 13.641 | 2.728 | 0.135  | 13.542  | 275.12 | --             | Open Sea | Intergenic       |         |
| dhrt12 | 95,898,435  | 2.49E-02 | 8.42E-01 | 0.882 | 88.235 | 0.750 | 75.000 | 0.065 | 6.462  | 1.292 | 0.117 | 11.677 | 2.335 | -0.132 | -13.235 | 275.12 | CA             | Open Sea | Intergenic       |         |
| dhrt12 | 97,197,053  | 3.41E-02 | 3.41E-02 | 0.410 | 41.026 | 0.638 | 63.830 | 0.245 | 24.494 | 4.899 | 0.109 | 10.912 | 2.182 | 0.228  | 22.804  | 276.12 | AG             | Open Sea | Intergenic       |         |
| dhrt12 | 97,197,723  | 3.40E-02 | 3.40E-02 | 0.633 | 63.333 | 0.652 | 65.217 | 0.104 | 10.413 | 2.083 | 0.218 | 21.783 | 4.387 | -0.181 | -18.116 | 276.12 | ca             | Open Sea | Intergenic       |         |
| dhrt12 | 97,506,405  | 4.66E-02 | 3.46E-01 | 0.893 | 89.286 | 0.679 | 67.857 | 0.092 | 9.170  | 1.834 | 0.362 | 36.241 | 7.248 | -0.214 | -21.429 | 277.12 | --             | Open Sea | Intergenic       |         |
| dhrt12 | 97,506,661  | 3.48E-02 | 9.20E-02 | 0.317 | 31.707 | 0.563 | 56.250 | 0.117 | 11.692 | 2.338 | 0.230 | 22.984 | 4.597 | 0.245  | 24.543  | 277.12 | --             | Open Sea | Intergenic       |         |
| dhrt12 | 97,648,598  | 3.62E-03 | 4.15E-05 | 0.245 | 24.490 | 0.531 | 53.125 | 0.147 | 14.382 | 2.876 | 0.144 | 14.382 | 4.688 | 0.296  | 28.635  | 278.12 | --             | Open Sea | Intergenic       |         |
| dhrt12 | 97,648,629  | 3.24E-03 | 4.15E-05 | 0.229 | 22.917 | 0.547 | 54.717 | 0.147 | 14.719 | 2.944 | 0.180 | 17.971 | 3.594 | 0.318  | 31.800  | 278.12 | --             | Open Sea | Intergenic       |         |
| dhrt12 | 102,452,154 | 3.18E-02 | 6.79E-03 | 0.888 | 88.288 | 0.761 | 76.087 | 0.078 | 7.763  | 1.553 | 0.071 | 7.084  | 1.417 | -0.122 | -12.201 | 279.12 | CA             | Open Sea | Intergenic       |         |
| dhrt12 | 102,452,327 | 4.90E-02 | 6.79E-03 | 0.847 | 84.746 | 0.667 | 66.667 | 0.115 | 11.519 | 2.304 | 0.168 | 16.837 | 3.367 | -0.181 | -18.079 | 279.12 | --             | Open Sea | Intergenic       |         |
| dhrt12 | 102,933,166 | 3.84E-03 | 3.82E-05 | 0.306 | 30.556 | 0.632 | 63.219 | 0.345 | 34.508 | 6.902 | 0.119 | 11.894 | 2.379 | 0.327  | 32.663  | 280.12 | Check manually | Open Sea | Intergenic       |         |
| dhrt12 | 102,933,183 | 1.82E-03 | 3.82E-05 | 0.299 | 29.951 | 0.610 | 61.039 | 0.059 | 5.923  | 1.185 | 0.314 | 31.446 | 6.289 | 0.312  | 31.199  | 280.12 | Check manually | Open Sea | Intergenic       |         |
| dhrt12 | 102,933,187 | 1.67E-02 | 3.82E-05 | 0.348 | 34.848 | 0.587 | 58.667 | 0.239 | 23.946 | 4.789 | 0.140 | 13.990 | 2.798 | 0.238  | 23.818  | 280.12 | Check manually | Open Sea | Intergenic       |         |
| dhrt12 | 102,970,966 | 1.57E-02 | 2.45E-02 | 0.776 | 77.632 | 0.500 | 50.000 | 0.249 | 24.859 | 4.972 | 0.088 | 8.759  | 1.752 | -0.276 | -27.632 | 281.12 | --             | Open Sea | Intron 1/48      | Unc79   |
| dhrt12 | 102,970,966 | 2.45E-02 | 2.45E-02 | 0.776 | 77.632 | 0.500 | 50.000 | 0.249 | 24.859 | 4.972 | 0.088 | 8.759  | 1.752 | -0.276 | -27.632 | 281.12 | --             | Open Sea | Intron 1/51      | Unc79   |
| dhrt12 | 102,971,219 | 6.05E-03 | 1.85E-04 | 0.783 | 78.261 | 0.381 | 38.095 | 0.783 | 78.261 | 4.466 | 0.222 | 22.228 | 4.466 | -0.002 | -0.002  | 281.12 | --             | Open Sea | Intron 1/51      | Unc79   |
| dhrt12 | 102,971,219 | 6.05E-03 | 1.85E-04 | 0.783 | 78.261 | 0.381 | 38.095 | 0.783 | 78.261 | 4.466 | 0.222 | 22.228 | 4.466 | -0.002 | -0.002  | 281.12 | --             | Open Sea | Intron 1/51      | Unc79   |
| dhrt12 | 103,572,025 | 1.61E-03 | 3.40E-04 | 0.276 | 27.586 | 0.698 | 69.767 | 0.228 | 22.776 | 4.555 | 0.172 | 17.186 | 3.437 | 0.422  | 42.181  | 282.12 | TG             | Open Sea | Intron 3/24      | Ppp444  |
| dhrt12 | 103,572,025 | 9.07E-04 | 3.40E-04 | 0.276 | 27.586 | 0.698 | 69.767 | 0.228 | 22.776 | 4.555 | 0.172 | 17.186 | 3.437 | 0.422  | 42.181  | 282.12 | --             | Open Sea | Intron 3/24      | Ppp444  |
| dhrt12 | 106,613,322 | 6.89E-03 | 4.12E-01 | 0.811 | 81.081 | 0.409 | 40.909 | 0.363 | 36.297 | 7.259 | 0.288 | 29.770 | 5.954 | -0.375 | -37.469 | 283.12 | CG nearby      | Open Sea | false intergenic | Mrt1188 |
| dhrt12 | 106,613,322 | 6.89E-03 | 4.12E-01 | 0.811 | 81.081 | 0.409 | 40.909 | 0.363 | 36.297 | 7.259 | 0.288 | 29.770 | 5.954 | -0.375 | -37.469 | 283.12 | CG nearby      | Open Sea | Intron 2/4       | Rian    |
| dhrt12 | 106,613,322 | 6.89E-03 | 4.12E-01 | 0.811 | 81.081 | 0.409 | 40.909 | 0.363 | 36.297 | 7.259 | 0.288 | 29.770 | 5.954 | -0.375 | -37.469 | 283.12 | CG nearby      | Open Sea | Intron 2/7       | Rian    |
| dhrt12 | 106,613,335 | 2.24E-02 | 4.12E-01 | 0.811 | 81.081 | 0.520 | 52.000 | 0.193 | 19.342 | 3.868 | 0.122 | 12.210 | 2.442 | -0.291 | -29.081 | 283.12 | TT             | Open Sea | Intron 2/4       | Rian    |
| dhrt12 | 106,613,335 | 2.24E-02 | 4.12E-01 | 0.811 | 81.081 | 0.520 | 52.000 | 0.193 | 19.342 | 3.868 | 0.122 | 12.210 | 2.442 | -0.291 | -29.081 | 283.12 | TT             | Open Sea | Intron 2/7       | Rian    |
| dhrt12 | 106,613,335 | 2.24E-02 | 4.12E-01 | 0.811 | 81.081 | 0.520 | 52.000 | 0.193 | 19.342 | 3.868 | 0.122 | 12.210 | 2.442 | -0.291 | -29.081 | 283.12 | TT             | Open Sea | Intron 2/7       | Rian    |
| dhrt12 | 106,613,335 | 2.24E-02 | 4.12E-01 | 0.811 | 81.081 | 0.520 | 52.000 | 0.193 | 19.342 | 3.868 | 0.122 | 12.210 | 2.442 | -0.291 | -29.081 | 283.12 | TT             | Open Sea | Intron 2/7       | Rian    |
| dhrt12 | 106,613,335 | 2.24E-02 | 4.12E-01 | 0.811 | 81.081 | 0.520 | 52.000 | 0.193 | 19.342 | 3.868 | 0.122 | 12.210 | 2.442 | -0.291 | -29.081 | 283.12 | TT             | Open Sea | Intron 2/7       | Rian    |
| dhrt12 | 106,613,335 | 2.24E-02 | 4.12E-01 | 0.811 | 81.081 | 0.520 | 52.000 | 0.193 | 19.342 | 3.868 | 0.122 | 12.210 | 2.442 | -0.291 | -29.081 | 283.12 | TT             | Open Sea | Intron 2/7       | Rian    |
| dhrt12 | 106,613,335 | 2.24E-02 | 4.12E-01 | 0.811 | 81.081 | 0.520 | 52.000 | 0.193 | 19.342 | 3.868 | 0.122 | 12.210 | 2.442 | -0.291 | -29.081 | 283.12 | TT             | Open Sea | Intron 2/7       | Rian    |
| dhrt12 | 106,613,335 | 2.24E-02 | 4.12E-01 | 0.811 | 81.081 | 0.520 | 52.000 | 0.193 | 19.342 | 3.868 | 0.122 | 12.210 | 2.442 | -0.291 | -29.081 | 283.12 | TT             | Open Sea | Intron 2/7       | Rian    |
| dhrt12 | 106,613,335 | 2.24E-02 | 4.12E-01 | 0.811 | 81.081 | 0.520 | 52.000 | 0.193 | 19.342 | 3.868 | 0.122 | 12.210 | 2.442 | -0.291 | -29.081 | 283.12 | TT             | Open Sea | Intron 2/7       | Rian    |
| dhrt12 | 106,613,335 | 2.24E-02 | 4.12E-01 | 0.811 | 81.081 | 0.520 | 52.000 | 0.193 | 19.342 | 3.868 | 0.122 | 12.210 | 2.442 | -0.291 | -29.081 | 283.12 | TT             | Open Sea | Intron 2/7       | Rian    |
| dhrt12 | 106,613,335 | 2.24E-02 | 4.12E-01 | 0.811 | 81.081 | 0.520 | 52.000 | 0.193 | 19.342 | 3.868 | 0.122 | 12.210 | 2.442 | -0.291 | -29.081 | 283.12 | TT             | Open Sea | Intron 2/7       | Rian    |
| dhrt12 | 106,613,335 | 2.24E-02 | 4.12E-01 | 0.811 | 81.081 | 0.520 | 52.000 | 0.193 | 19.342 | 3.868 | 0.122 | 12.210 | 2.442 | -0.291 | -29.081 | 283.12 | TT             | Open Sea | Intron 2/7       | Rian    |
| dhrt12 | 106,613,335 | 2.24E-02 | 4.12E-01 | 0.811 | 81.081 | 0.520 | 52.000 | 0.193 | 19.342 | 3.868 | 0.122 | 12.210 | 2.442 | -0.291 | -29.081 | 283.12 | TT             | Open Sea | Intron 2/7       | Rian    |
| dhrt12 | 106,613,335 | 2.24E-02 | 4.12E-01 | 0.811 | 81.081 | 0.520 | 52.000 | 0.193 | 19.342 | 3.868 | 0.122 | 12.210 | 2.442 | -0.291 | -29.081 | 283.12 | TT             | Open Sea | Intron 2/7       | Rian    |
| dhrt12 | 106,613,335 | 2.24E-02 | 4.12E-01 | 0.811 | 81.081 | 0.520 | 52.000 | 0.193 | 19.342 | 3.868 | 0.122 | 12.210 | 2.442 | -0.291 | -29.081 | 283.12 | TT             | Open Sea | Intron 2/7       | Rian    |
| dhrt12 | 106,613,335 | 2.24E-02 | 4.12E-01 | 0.811 | 81.081 | 0.520 | 52.000 | 0.193 | 19.342 | 3.868 | 0.122 | 12.210 | 2.442 | -0.291 | -29.081 | 283.12 | TT             | Open Sea | Intron 2/7       | Rian    |
| dhrt12 | 106,613,335 | 2.24E-02 | 4.12E-01 | 0.811 | 81.081 | 0.520 | 52.000 | 0.193 | 19.342 | 3.868 | 0.122 | 12.210 | 2.442 | -0.291 | -29.081 | 283.12 | TT             | Open Sea | Intron 2/7       | Rian    |
| dhrt12 | 106,613,335 | 2.24E-02 | 4.12E-01 | 0.811 | 81.081 | 0.520 | 52.000 | 0.193 | 19.342 | 3.868 | 0.122 | 12.210 | 2.442 | -0.291 | -29.081 | 283.12 | TT             | Open Sea | Intron 2/7       | Rian    |
| dhrt12 | 106,613,335 | 2.24E-02 | 4.12E-01 | 0.811 | 81.081 | 0.520 | 52.000 | 0.193 | 19.342 | 3.868 | 0.122 | 12.210 | 2.442 | -0.291 | -29.081 | 283.12 | TT             | Open Sea | Intron 2/7       | Rian    |
| dhrt12 | 106,613,335 | 2.24E-02 | 4.12E-01 | 0.811 | 81.081 | 0.520 | 52.000 | 0.193 | 19.342 | 3.868 | 0.122 | 12.210 | 2.442 | -0.291 | -29.081 | 283.12 | TT             | Open Sea | Intron 2/7       | Rian    |
| dhrt12 | 106,613,335 | 2.24E-02 | 4.12E-01 | 0.811 | 81.081 | 0.520 | 52.000 | 0.193 | 19.342 | 3.868 | 0.122 | 12.210 | 2.442 | -0.291 | -29.081 | 283.12 | TT             | Open Sea | Intron 2/7       | Rian    |
| dhrt12 | 106,613,335 | 2.24E-02 | 4.12E-01 | 0.811 | 81.081 | 0.520 | 52.000 | 0.193 | 19.342 | 3.868 | 0.122 | 12.210 | 2.442 | -0.291 | -29.081 | 283.12 | TT             | Open Sea | Intron 2/7       | Rian    |
| dhrt12 | 106,613,335 | 2.24E-02 | 4.12E-01 | 0.811 | 81.081 | 0.520 | 52.000 | 0.193 | 19.342 | 3.868 | 0.122 | 12.210 | 2.442 | -0.291 | -29.081 | 283.12 | TT             | Open Sea | Intron 2/7       | Rian    |
| dhrt12 | 106,613,335 | 2.24E-02 | 4.12E-01 | 0.811 | 81.081 | 0.520 | 52.000 | 0.193 | 19.342 | 3.868 | 0.122 | 12     |       |        |         |        |                |          |                  |         |



|       |             |          |          |        |        |       |        |       |        |        |         |        |        |        |         |         |                |                |              |            |
|-------|-------------|----------|----------|--------|--------|-------|--------|-------|--------|--------|---------|--------|--------|--------|---------|---------|----------------|----------------|--------------|------------|
| chr13 | 62,907,805  | 1.04E-02 | 1.11E-02 | 0.111  | 11.111 | 0.383 | 38.298 | 0.207 | 20.730 | 4.146  | 0.130   | 13.004 | 2.601  | 0.272  | 27.187  | 315.13  | CA             | Open Sea       | Intergenic   |            |
| chr13 | 66,270,410  | 1.20E-02 | 5.51E-03 | 0.853  | 65.306 | 0.755 | 75.479 | 0.077 | 7.737  | 1.547  | 0.054   | 5.414  | 1.083  | 0.102  | 10.173  | 316.13  | --             | Open Sea       | Intergenic   |            |
| chr13 | 66,270,547  | 5.03E-02 | 5.61E-01 | 61.111 | 6111.1 | 0.243 | 24.343 | 0.260 | 26.043 | 0.198  | 0.198   | 19.796 | 1.791  | 0.210  | 21.032  | 316.13  | --             | Open Sea       | Intergenic   |            |
| chr13 | 72,010,160  | 2.36E-02 | 2.11E-02 | 0.581  | 58.065 | 0.778 | 77.778 | 0.118 | 11.767 | 2.353  | 0.104   | 10.417 | 2.083  | 0.107  | 19.713  | 317.13  | --             | Open Sea       | Intergenic   |            |
| chr13 | 72,010,785  | 1.58E-02 | 5.44E-02 | 0.697  | 69.718 | 0.852 | 85.217 | 0.150 | 14.959 | 2.992  | 0.102   | 10.169 | 2.034  | 0.155  | 15.499  | 317.13  | --             | Open Sea       | Intergenic   |            |
| chr13 | 74,289,740  | 4.82E-02 | 2.42E-01 | 0.645  | 64.486 | 0.768 | 76.786 | 0.067 | 6.656  | 1.331  | 0.127   | 12.741 | 2.548  | 0.123  | 12.300  | 318.13  | ca             | Open Sea       | Intergenic   |            |
| chr13 | 74,270,058  | 2.04E-02 | 4.45E-01 | 4.181  | 418.1  | 0.632 | 63.263 | 0.260 | 26.043 | 0.126  | 0.126   | 12.590 | 2.518  | 0.181  | 18.181  | 318.13  | Check manually | Open Sea       | Intergenic   |            |
| chr13 | 77,044,925  | 3.49E-02 | 3.49E-02 | 0.575  | 57.500 | 0.776 | 77.586 | 0.185 | 18.536 | 3.707  | 0.074   | 7.446  | 1.489  | 0.201  | 20.086  | 319.13  | TA             | Open Sea       | Intron 20/20 |            |
| chr13 | 77,045,756  | 4.54E-02 | 4.24E-02 | 0.800  | 80.000 | 0.605 | 60.526 | 0.118 | 11.809 | 2.362  | 0.167   | 16.696 | 3.339  | -0.195 | -19.474 | 319.13  | AA             | Open Sea       | Intron 20/20 |            |
| chr13 | 79,333,415  | 3.39E-02 | 5.75E-02 | 0.700  | 70.000 | 0.894 | 89.362 | 0.211 | 21.079 | 4.216  | 0.058   | 5.796  | 1.159  | 0.184  | 18.362  | 320.13  | --             | Open Sea       | Intergenic   |            |
| chr13 | 79,333,576  | 1.83E-02 | 1.83E-02 | 0.661  | 66.100 | 0.789 | 78.929 | 0.176 | 17.622 | 3.256  | 0.126   | 12.657 | 2.847  | 0.137  | 13.000  | 320.13  | --             | Open Sea       | Intergenic   |            |
| chr13 | 79,606,650  | 1.38E-02 | 1.38E-02 | 0.648  | 64.789 | 0.829 | 82.985 | 0.131 | 13.058 | 2.612  | 0.066   | 6.589  | 1.314  | 0.191  | 18.106  | 321.13  | --             | Open Sea       | Intergenic   |            |
| chr13 | 79,607,543  | 3.79E-02 | 3.79E-02 | 0.303  | 30.263 | 0.467 | 46.667 | 0.102 | 10.203 | 2.041  | 0.085   | 8.462  | 1.692  | 0.164  | 16.404  | 321.13  | --             | Open Sea       | Intergenic   |            |
| chr13 | 82,737,496  | 1.72E-02 | 1.99E-03 | 0.702  | 70.213 | 0.886 | 88.571 | 0.162 | 16.111 | 3.222  | 0.077   | 7.738  | 1.548  | 0.184  | 18.359  | 322.13  | --             | Open Sea       | Intergenic   |            |
| chr13 | 82,737,504  | 4.50E-02 | 1.99E-03 | 0.586  | 58.769 | 0.736 | 73.611 | 0.100 | 9.974  | 1.995  | 0.068   | 6.795  | 1.359  | 0.181  | 18.056  | 322.13  | AG             | Open Sea       | Intergenic   |            |
| chr13 | 83,526,587  | 2.84E-02 | 1.02E-02 | 0.419  | 41.935 | 0.143 | 14.286 | 0.231 | 23.075 | 4.615  | 0.110   | 10.963 | 2.193  | -0.276 | -27.650 | 323.13  | TA             | S Shore        | Intron 2/10  |            |
| chr13 | 83,526,587  | 2.84E-02 | 1.02E-02 | 0.419  | 41.935 | 0.143 | 14.286 | 0.231 | 23.075 | 4.615  | 0.110   | 10.963 | 2.193  | -0.276 | -27.650 | 323.13  | TA             | S Shore        | Intron 2/10  |            |
| chr13 | 83,526,794  | 2.22E-02 | 1.83E-02 | 0.800  | 80.000 | 0.533 | 53.333 | 0.120 | 11.960 | 2.392  | 0.232   | 23.209 | 4.642  | -0.267 | -26.667 | 323.13  | AC             | S Shore        | Intron 2/10  |            |
| chr13 | 83,526,794  | 2.22E-02 | 1.83E-02 | 0.800  | 80.000 | 0.533 | 53.333 | 0.120 | 11.960 | 2.392  | 0.232   | 23.209 | 4.642  | -0.267 | -26.667 | 323.13  | AC             | S Shore        | Intron 2/10  |            |
| chr13 | 84,333,092  | 8.39E-03 | 2.30E-02 | 0.540  | 54.286 | 0.841 | 84.333 | 0.092 | 9.273  | 27.341 | 4.968   | 1.185  | 18.489 | 3.688  | 0.298   | 29.805  | 324.13         | GA             | Open Sea     | Intergenic |
| chr13 | 84,333,117  | 1.67E-02 | 6.64E-02 | 0.541  | 54.054 | 0.796 | 79.592 | 0.284 | 28.392 | 5.678  | 0.180   | 18.011 | 3.602  | 0.255  | 25.538  | 324.13  | GA             | Open Sea       | Intergenic   |            |
| chr13 | 84,759,825  | 2.74E-02 | 1.30E-01 | 0.449  | 44.960 | 0.539 | 53.889 | 0.260 | 26.010 | 5.202  | 0.085   | 8.510  | 1.702  | 0.190  | 19.029  | 325.13  | --             | Open Sea       | Intergenic   |            |
| chr13 | 84,760,064  | 4.95E-02 | 1.41E-03 | 0.586  | 58.621 | 0.821 | 82.143 | 0.300 | 30.000 | 6.000  | 0.117   | 11.655 | 2.331  | 0.235  | 23.522  | 325.13  | --             | Open Sea       | Intergenic   |            |
| chr13 | 85,964,635  | 3.55E-02 | 3.55E-02 | 0.596  | 59.596 | 0.786 | 78.571 | 0.146 | 14.649 | 2.930  | 0.130   | 13.027 | 2.605  | 0.190  | 18.975  | 326.13  | --             | Open Sea       | Intergenic   |            |
| chr13 | 85,965,287  | 6.69E-03 | 2.69E-02 | 0.389  | 38.889 | 0.773 | 77.773 | 0.307 | 30.723 | 6.145  | 0.212   | 21.189 | 4.238  | 0.384  | 38.384  | 326.13  | --             | Open Sea       | Intergenic   |            |
| chr13 | 87,438,992  | 1.95E-02 | 7.16E-01 | 0.816  | 81.333 | 0.529 | 52.941 | 0.266 | 26.666 | 0.255  | 0.255   | 25.506 | 5.101  | 0.286  | -28.638 | 327.13  | CA             | Open Sea       | Intergenic   |            |
| chr13 | 87,439,703  | 1.71E-02 | 1.71E-02 | 0.667  | 66.667 | 0.348 | 34.783 | 0.662 | 6.647  | 6.487  | 0.192   | 19.834 | 3.324  | -0.319 | -31.869 | 327.13  | TA             | Open Sea       | Intergenic   |            |
| chr13 | 89,418,990  | 2.24E-02 | 6.80E-03 | 0.821  | 82.090 | 0.300 | 30.293 | 0.110 | 11.043 | 2.209  | 0.168   | 16.173 | 3.235  | -0.191 | -19.127 | 328.13  | ca             | Open Sea       | Intergenic   |            |
| chr13 | 89,419,090  | 4.16E-03 | 4.16E-03 | 0.790  | 79.048 | 0.586 | 58.559 | 0.260 | 26.000 | 16.992 | 0.398   | 1.112  | 11.205 | 2.241  | -0.205  | -20.489 | 328.13         | Check manually | Open Sea     | Intergenic |
| chr13 | 89,483,717  | 3.48E-02 | 3.48E-02 | 0.766  | 76.613 | 0.690 | 69.403 | 0.136 | 13.614 | 3.135  | 0.131   | 13.099 | 3.124  | -0.160 | -16.026 | 329.13  | --             | Open Sea       | Intergenic   |            |
| chr13 | 89,484,088  | 1.75E-02 | 1.75E-02 | 0.766  | 76.613 | 0.890 | 89.000 | 0.116 | 11.606 | 2.321  | 0.086   | 8.560  | 1.712  | 0.124  | 12.387  | 329.13  | --             | Open Sea       | Intergenic   |            |
| chr13 | 89,600,624  | 2.38E-02 | 6.10E-05 | 0.739  | 73.913 | 0.417 | 41.667 | 0.187 | 18.702 | 3.740  | 0.221   | 22.148 | 4.430  | -0.322 | -32.246 | 330.13  | CA             | Open Sea       | Intron 2/4   |            |
| chr13 | 89,600,665  | 4.33E-02 | 6.10E-05 | 0.645  | 64.516 | 0.394 | 39.394 | 0.318 | 31.843 | 6.369  | 0.124   | 12.381 | 2.476  | -0.251 | -25.122 | 330.13  | CG nearby      | Open Sea       | Intron 2/4   |            |
| chr13 | 90,941,497  | 1.15E-02 | 3.42E-01 | 0.229  | 22.900 | 0.120 | 12.039 | 0.191 | 19.200 | 2.429  | 0.100   | 10.000 | 3.820  | 0.307  | 30.714  | 331.13  | TA             | Open Sea       | Intergenic   |            |
| chr13 | 90,941,520  | 5.33E-03 | 1.36E-05 | 0.200  | 20.000 | 0.577 | 57.692 | 0.137 | 13.652 | 2.730  | 0.194   | 19.443 | 3.869  | 0.377  | 37.692  | 331.13  | --             | Open Sea       | Intron 5/7   |            |
| chr13 | 90,941,567  | 3.32E-02 | 3.86E-06 | 0.222  | 22.222 | 0.556 | 55.556 | 0.246 | 24.555 | 4.911  | 0.120   | 12.044 | 2.409  | 0.333  | 33.333  | 331.13  | --             | Open Sea       | Intron 5/7   |            |
| chr13 | 93,014,616  | 1.29E-02 | 1.54E-02 | 0.367  | 36.735 | 0.630 | 63.043 | 0.079 | 7.922  | 1.584  | 0.220   | 22.008 | 4.402  | 0.263  | 26.309  | 332.13  | CA             | Open Sea       | Intergenic   |            |
| chr13 | 93,014,659  | 1.54E-02 | 1.54E-02 | 0.367  | 36.735 | 0.630 | 63.043 | 0.079 | 7.922  | 1.584  | 0.220   | 22.008 | 4.402  | 0.263  | 26.309  | 332.13  | CA             | Open Sea       | Intergenic   |            |
| chr13 | 94,470,933  | 4.83E-02 | 5.12E-01 | 0.267  | 26.667 | 0.521 | 52.083 | 0.377 | 37.882 | 7.536  | 0.273   | 27.307 | 5.461  | 0.293  | 29.307  | 332.13  | GA             | Open Sea       | Intron 15/26 |            |
| chr13 | 94,471,378  | 1.47E-02 | 2.44E-01 | 0.448  | 44.828 | 0.759 | 75.862 | 0.250 | 25.006 | 5.001  | 0.114   | 11.435 | 2.287  | 0.310  | 31.034  | 333.13  | CG             | Open Sea       | Intron 15/26 |            |
| chr13 | 99,167,069  | 1.13E-02 | 1.39E-03 | 0.819  | 81.905 | 0.634 | 63.366 | 0.378 | 37.796 | 7.559  | 0.113   | 11.297 | 2.259  | -0.185 | -18.538 | 334.13  | --             | Open Sea       | Intergenic   |            |
| chr13 | 99,167,077  | 6.98E-02 | 3.85E-03 | 0.643  | 64.343 | 0.634 | 63.366 | 0.378 | 37.796 | 7.559  | 0.113   | 11.297 | 2.259  | -0.185 | -18.538 | 334.13  | --             | Open Sea       | Intergenic   |            |
| chr13 | 100,093,458 | 7.44E-03 | 1.02E-03 | 0.167  | 16.667 | 0.515 | 51.515 | 0.121 | 12.068 | 2.414  | 0.270   | 27.019 | 5.404  | 0.348  | 34.848  | 335.13  | CG             | Open Sea       | Exon 5/39    |            |
| chr13 | 100,093,498 | 6.78E-03 | 1.02E-03 | 0.156  | 15.625 | 0.469 | 46.875 | 0.112 | 11.180 | 2.236  | 0.249   | 24.906 | 4.981  | 0.313  | 31.250  | 335.13  | --             | Open Sea       | Exon 5/39    |            |
| chr13 | 103,917,265 | 4.97E-02 | 3.28E-03 | 0.857  | 85.714 | 0.695 | 69.524 | 0.051 | 5.074  | 1.015  | 0.175   | 17.451 | 3.490  | -0.162 | -16.190 | 336.13  | GT             | N Shelf        | Intron 1/25  |            |
| chr13 | 103,917,265 | 4.97E-02 | 3.28E-03 | 0.857  | 85.714 | 0.695 | 69.524 | 0.051 | 5.074  | 1.015  | 0.175   | 17.451 | 3.490  | -0.162 | -16.190 | 336.13  | GT             | N Shelf        | Intron 1/25  |            |
| chr13 | 103,917,265 | 4.97E-02 | 3.28E-03 | 0.857  | 85.714 | 0.695 | 69.524 | 0.051 | 5.074  | 1.015  | 0.175   | 17.451 | 3.490  | -0.162 | -16.190 | 336.13  | GT             | N Shelf        | Intron 1/25  |            |
| chr13 | 103,917,304 | 1.19E-02 | 3.28E-03 | 0.856  | 85.556 | 0.674 | 67.416 | 0.067 | 6.726  | 1.345  | 0.167   | 16.714 | 3.343  | -0.181 | -18.140 | 336.13  | --             | Open Sea       | Intron 1/25  |            |
| chr13 | 103,917,304 | 1.19E-02 | 3.28E-03 | 0.856  | 85.556 | 0.674 | 67.416 | 0.067 | 6.726  | 1.345  | 0.167   | 16.714 | 3.343  | -0.181 | -18.140 | 336.13  | --             | Open Sea       | Intron 1/25  |            |
| chr13 | 106,547,939 | 3.02E-02 | 1.56E-02 | 0.559  | 55.932 | 0.352 | 35.185 | 0.267 | 26.731 | 5.346  | 0.193   | 19.342 | 3.868  | -0.207 | -20.747 | 337.13  | CA             | Open Sea       | Intergenic   |            |
| chr13 | 106,548,040 | 4.39E-02 | 1.56E-02 | 0.648  | 64.817 | 0.467 | 46.667 | 0.150 | 15.030 | 3.006  | 0.144   | 14.382 | 2.876  | -0.181 | -18.148 | 337.13  | GT             | Open Sea       | Intergenic   |            |
| chr13 | 107,907,343 | 4.60E-02 | 6.08E-01 | 0.571  | 57.143 | 0.850 | 85.000 | 0.077 | 7.674  | 1.535  | 0.205   | 20.467 | 4.093  | 0.279  | 27.857  | 338.13  | --             | Open Sea       | Intergenic   |            |
| chr13 | 107,907,558 | 2.30E-02 | 3.36E-02 | 0.367  | 36.735 | 0.630 | 63.043 | 0.079 | 7.922  | 1.584  | 0.220   | 22.008 | 4.402  | 0.263  | 26.309  | 338.13  | --             | Open Sea       | Intergenic   |            |
| chr13 | 109,007,917 | 3.96E-02 | 5.05E-01 | 0.169  | 16.949 | 0.340 | 34.000 | 0.377 | 37.747 | 7.549  | 0.105   | 10.501 | 2.100  | 0.171  | 17.051  | 339.13  | --             | Open Sea       | Intergenic   |            |
| chr13 | 109,008,254 | 3.98E-02 | 3.98E-02 | 0.350  | 35.000 | 0.588 | 58.824 | 0.199 | 19.925 | 3.985  | 0.255   | 25.477 | 5.095  | 0.238  | 23.824  | 339.13  | --             | Open Sea       | Intergenic   |            |
| chr13 | 110,049,498 | 4.57E-02 | 3.95E-03 | 0.580  | 58.000 | 0.397 | 39.726 | 0.211 | 21.098 | 4.220  | 0.072   | 7.214  | 1.443  | -0.183 | -18.274 | 340.13  | CA             | Open Sea       | Intergenic   |            |
| chr13 | 110,049,362 | 3.82E-02 | 3.82E-03 | 0.611  | 61.111 | 0.423 | 42.333 | 0.143 | 14.330 | 2.163  | 0.140   | 14.063 | 3.107  | 0.197  | 19.658  | 340.13  | AG             | Open Sea       | Intergenic   |            |
| chr13 | 112,304,589 | 3.10E-02 | 4.87E-03 | 0.604  | 60.417 | 0.816 | 81.579 | 0.195 | 19.476 | 3.895  | 0.116   | 11.578 | 2.316  | 0.212  | 21.162  | 341.13  | --             | Open Sea       | Intron 1/10  |            |
| chr13 | 112,304,665 | 1.85E-03 | 9.12E-03 | 0.419  | 41.935 | 0.815 | 81.481 | 0.256 | 25.617 | 5.123  | 0.126</ |        |        |        |         |         |                |                |              |            |



|       |            |          |          |        |        |        |        |       |        |       |       |        |       |         |         |        |                |          |              |
|-------|------------|----------|----------|--------|--------|--------|--------|-------|--------|-------|-------|--------|-------|---------|---------|--------|----------------|----------|--------------|
| chrt4 | 46,527,863 | 4.52E-02 | 7.42E-03 | 0.200  | 20.000 | 0.464  | 46.429 | 0.164 | 16.433 | 3.287 | 0.292 | 29.213 | 5.843 | 0.264   | 26.429  | 364.14 | --             | Open Sea | Intergenic   |
| chrt4 | 48,911,397 | 4.18E-02 | 2.50E-01 | 0.279  | 27.907 | 0.532  | 53.226 | 0.100 | 10.993 | 1.999 | 0.263 | 26.301 | 5.260 | 0.253   | 25.319  | 365.14 | CG nearby      | Open Sea | Intergenic   |
| chrt4 | 49,811,404 | 2.85E-03 | 2.30E-01 | 0.600  | 36.000 | 0.600  | 60.000 | 0.360 | 3.600  | 0.421 | 0.140 | 13.990 | 0.721 | 0.140   | 24.000  | 365.14 | CG nearby      | Open Sea | Intergenic   |
| chrt4 | 49,886,811 | 1.68E-02 | 1.68E-02 | 0.583  | 0.583  | 0.752  | 75.221 | 0.157 | 15.701 | 3.140 | 0.161 | 16.102 | 3.220 | 0.170   | 16.954  | 366.14 | --             | S Shelf  | Intergenic   |
| chrt4 | 49,887,450 | 4.95E-02 | 3.24E-02 | 0.556  | 55.556 | 0.681  | 68.067 | 0.209 | 20.910 | 4.182 | 0.041 | 4.057  | 0.811 | 0.125   | 12.512  | 366.14 | --             | S Shelf  | Intergenic   |
| chrt4 | 51,423,920 | 3.34E-02 | 3.34E-02 | 0.489  | 48.936 | 0.283  | 28.302 | 0.244 | 24.444 | 4.889 | 0.144 | 14.372 | 2.874 | -0.206  | -20.634 | 367.14 | --             | Open Sea | Intergenic   |
| chrt4 | 51,424,784 | 4.56E-02 | 5.33E-01 | 0.833  | 53.333 | 0.421  | 42.069 | 0.316 | 31.647 | 0.316 | 0.412 | 4.099  | 0.395 | -29.467 | -29.467 | 367.14 | --             | Open Sea | Intergenic   |
| chrt4 | 56,486,974 | 1.67E-02 | 3.36E-02 | 0.441  | 44.118 | 0.727  | 72.727 | 0.186 | 18.558 | 3.712 | 0.154 | 15.392 | 3.078 | 0.286   | 28.610  | 368.14 | --             | Open Sea | Intergenic   |
| chrt4 | 56,487,003 | 4.60E-02 | 3.36E-02 | 0.559  | 55.882 | 0.824  | 82.353 | 0.271 | 27.090 | 5.418 | 0.103 | 10.262 | 2.052 | 0.285   | 26.471  | 368.14 | CA             | Open Sea | Intergenic   |
| chrt4 | 61,048,812 | 3.78E-02 | 3.78E-02 | 0.784  | 78.431 | 0.596  | 59.615 | 0.103 | 10.262 | 2.052 | 0.159 | 15.872 | 3.174 | -0.188  | -18.816 | 369.14 | --             | Open Sea | Intergenic   |
| chrt4 | 61,048,759 | 4.03E-01 | 0.700    | 0.700  | 70.000 | 0.148  | 14.801 | 0.159 | 15.889 | 0.173 | 0.173 | 1.731  | 0.171 | 0.171   | 17.271  | 369.14 | --             | Open Sea | Intergenic   |
| chrt4 | 63,693,383 | 3.00E-03 | 2.06E-02 | 0.184  | 18.421 | 0.543  | 54.286 | 0.117 | 11.698 | 2.340 | 0.173 | 17.321 | 3.464 | 0.359   | 35.865  | 370.14 | --             | Open Sea | Intergenic   |
| chrt4 | 63,693,386 | 3.92E-02 | 2.06E-02 | 0.200  | 20.000 | 0.417  | 41.667 | 0.143 | 14.342 | 2.868 | 0.633 | 6.253  | 1.251 | 0.217   | 21.667  | 370.14 | --             | Open Sea | Intergenic   |
| chrt4 | 64,344,285 | 4.88E-02 | 6.62E-04 | 0.279  | 27.907 | 0.583  | 58.333 | 0.259 | 25.871 | 5.174 | 0.276 | 27.615 | 5.523 | 0.304   | 30.426  | 371.14 | TG             | Open Sea | Intron 6/10  |
| chrt4 | 64,344,295 | 4.88E-02 | 6.62E-04 | 0.279  | 27.907 | 0.583  | 58.333 | 0.259 | 25.871 | 5.174 | 0.276 | 27.615 | 5.523 | 0.304   | 30.426  | 371.14 | TG             | Open Sea | Intron 6/10  |
| chrt4 | 64,344,294 | 2.46E-03 | 6.62E-04 | 0.190  | 19.048 | 0.541  | 54.054 | 0.159 | 15.916 | 3.183 | 0.248 | 24.775 | 4.955 | 0.350   | 35.006  | 371.14 | CT             | Open Sea | Intron 6/10  |
| chrt4 | 64,344,294 | 2.46E-03 | 6.62E-04 | 0.190  | 19.048 | 0.541  | 54.054 | 0.159 | 15.916 | 3.183 | 0.248 | 24.775 | 4.955 | 0.350   | 35.006  | 371.14 | CT             | Open Sea | Intron 1/5   |
| chrt4 | 67,273,880 | 1.19E-02 | 5.56E-02 | 0.854  | 85.400 | 0.830  | 83.043 | 0.128 | 12.117 | 2.423 | 0.173 | 17.330 | 3.466 | -0.224  | -22.373 | 372.14 | CG nearby      | Open Sea | Intergenic   |
| chrt4 | 67,274,044 | 2.85E-02 | 1.59E-02 | 0.750  | 75.000 | 0.462  | 46.154 | 0.193 | 19.343 | 3.869 | 0.150 | 14.977 | 2.995 | -28.846 | -28.846 | 372.14 | TT             | Open Sea | TSS 1500     |
| chrt4 | 67,433,896 | 4.82E-04 | 2.92E-04 | 0.237  | 23.077 | 0.710  | 70.988 | 0.128 | 12.753 | 2.551 | 0.159 | 15.851 | 3.170 | 0.479   | 47.891  | 373.14 | --             | Open Sea | Intergenic   |
| chrt4 | 67,434,003 | 4.55E-02 | 2.92E-04 | 0.587  | 58.696 | 0.774  | 77.358 | 0.112 | 11.180 | 2.236 | 0.099 | 9.898  | 1.980 | 0.187   | 18.663  | 373.14 | TT             | Open Sea | Intergenic   |
| chrt4 | 68,120,319 | 1.64E-02 | 1.50E-01 | 0.741  | 74.074 | 0.524  | 52.381 | 0.092 | 22.172 | 1.834 | 0.277 | 27.749 | 5.550 | -22.693 | -22.693 | 374.14 | Check manually | N Shelf  | Exon 3/3     |
| chrt4 | 68,120,713 | 3.58E-02 | 2.47E-02 | 0.835  | 83.544 | 0.697  | 69.663 | 0.097 | 8.691  | 1.938 | 0.087 | 8.702  | 1.740 | -0.139  | -13.881 | 374.14 | CG             | N Shelf  | Exon 3/3     |
| chrt4 | 68,120,791 | 1.50E-02 | 3.71E-04 | 0.690  | 68.966 | 0.505  | 50.549 | 0.113 | 11.322 | 2.264 | 0.058 | 5.820  | 1.164 | -0.144  | -18.416 | 374.14 | AC             | N Shelf  | Exon 3/3     |
| chrt4 | 68,121,073 | 4.17E-02 | 1.82E-01 | 0.875  | 87.500 | 0.762  | 76.190 | 0.079 | 7.935  | 1.587 | 0.110 | 11.003 | 2.201 | -0.183  | -11.310 | 374.14 | CT             | N Shelf  | Exon 3/3     |
| chrt4 | 68,575,652 | 4.03E-02 | 1.15E-01 | 0.741  | 74.136 | 0.897  | 89.736 | 0.109 | 10.865 | 2.173 | 0.194 | 10.415 | 2.063 | 0.146   | 14.594  | 375.14 | --             | Open Sea | Intron 5/13  |
| chrt4 | 68,575,699 | 4.26E-02 | 4.03E-01 | 0.687  | 68.687 | 0.845  | 84.524 | 0.197 | 19.684 | 3.912 | 0.099 | 9.886  | 1.973 | 0.158   | 15.837  | 375.14 | --             | Open Sea | Intron 5/13  |
| chrt4 | 73,504,196 | 1.68E-02 | 5.33E-02 | 0.658  | 65.844 | 0.835  | 83.544 | 0.177 | 19.684 | 3.937 | 0.123 | 12.301 | 2.460 | 0.175   | 17.755  | 376.14 | --             | Open Sea | Intergenic   |
| chrt4 | 73,504,361 | 8.93E-03 | 1.45E-01 | 0.538  | 53.788 | 0.719  | 71.918 | 0.195 | 19.514 | 3.903 | 0.138 | 13.841 | 2.768 | 0.181   | 18.130  | 376.14 | --             | Open Sea | Intergenic   |
| chrt4 | 71,688,548 | 1.74E-02 | 1.40E-04 | 0.138  | 13.841 | 0.584  | 58.421 | 0.161 | 16.126 | 2.461 | 0.161 | 16.126 | 2.461 | 0.161   | 16.126  | 377.14 | CA             | Open Sea | Intron 1/18  |
| chrt4 | 77,668,571 | 1.45E-02 | 2.48E-05 | 0.130  | 13.043 | 0.462  | 46.154 | 0.129 | 42.123 | 8.425 | 0.234 | 23.365 | 4.673 | 0.331   | 33.110  | 377.14 | CA             | Open Sea | Intron 15/18 |
| chrt4 | 77,688,576 | 2.24E-02 | 2.48E-05 | 0.174  | 17.401 | 0.480  | 48.000 | 0.149 | 41.874 | 8.375 | 0.149 | 14.907 | 2.981 | 0.306   | 30.609  | 377.14 | TG             | Open Sea | Intron 15/18 |
| chrt4 | 78,625,963 | 1.77E-02 | 4.77E-03 | 0.453  | 45.283 | 0.698  | 69.811 | 0.156 | 15.569 | 3.114 | 0.180 | 18.017 | 3.603 | 0.245   | 24.528  | 378.14 | --             | Open Sea | Intron 5/28  |
| chrt4 | 78,626,047 | 3.19E-02 | 4.77E-03 | 0.216  | 21.646 | 0.430  | 43.035 | 0.108 | 10.808 | 2.221 | 0.163 | 16.318 | 2.231 | 0.148   | 14.828  | 378.14 | --             | Open Sea | Intron 5/28  |
| chrt4 | 80,238,764 | 2.26E-02 | 2.50E-03 | 0.583  | 58.333 | 0.759  | 75.949 | 0.092 | 8.216  | 1.843 | 0.110 | 10.991 | 2.198 | 0.176   | 17.616  | 379.14 | Check manually | Open Sea | Intergenic   |
| chrt4 | 80,238,817 | 1.19E-02 | 3.55E-03 | 0.767  | 76.667 | 0.940  | 94.000 | 0.187 | 18.749 | 3.750 | 0.073 | 7.256  | 1.451 | 0.173   | 17.333  | 379.14 | --             | Open Sea | Intergenic   |
| chrt4 | 81,782,322 | 4.65E-03 | 3.54E-03 | 0.429  | 42.857 | 0.833  | 83.333 | 0.276 | 27.573 | 5.515 | 0.120 | 11.960 | 2.382 | 0.405   | 40.476  | 380.14 | --             | Open Sea | Intergenic   |
| chrt4 | 91,782,396 | 9.17E-02 | 0.56E-09 | 0.250  | 25.000 | 0.940  | 94.000 | 0.150 | 15.000 | 2.500 | 0.150 | 1.500  | 2.500 | 0.150   | 1.500   | 380.14 | --             | Open Sea | Intergenic   |
| chrt4 | 82,405,220 | 2.14E-01 | 0.698    | 69.767 | 0.893  | 89.286 | 89.286 | 0.127 | 12.706 | 2.541 | 0.125 | 12.500 | 2.500 | 0.195   | 19.518  | 381.14 | --             | Open Sea | Intergenic   |
| chrt4 | 82,405,757 | 1.14E-02 | 1.14E-02 | 0.718  | 71.818 | 0.848  | 84.768 | 0.056 | 5.617  | 1.123 | 0.086 | 8.598  | 1.720 | 0.130   | 12.950  | 381.14 | Check manually | Open Sea | Intergenic   |
| chrt4 | 83,113,826 | 3.20E-02 | 7.79E-02 | 0.833  | 83.333 | 0.693  | 69.307 | 0.129 | 12.909 | 2.582 | 0.100 | 10.046 | 2.009 | -0.140  | -14.026 | 382.14 | --             | Open Sea | Intergenic   |
| chrt4 | 83,114,282 | 1.72E-02 | 1.72E-02 | 0.208  | 20.811 | 0.721  | 72.101 | 0.204 | 20.417 | 3.135 | 0.269 | 2.694  | 0.483 | 0.271   | 2.694   | 382.14 | --             | Open Sea | Intergenic   |
| chrt4 | 86,116,852 | 3.82E-02 | 1.12E-02 | 0.909  | 90.909 | 0.697  | 69.697 | 0.196 | 19.613 | 3.923 | 0.206 | 20.582 | 4.116 | -0.212  | -21.212 | 383.14 | TT             | Open Sea | Intergenic   |
| chrt4 | 86,117,071 | 4.61E-02 | 4.02E-01 | 0.683  | 68.293 | 0.868  | 86.842 | 0.341 | 34.055 | 6.811 | 0.090 | 9.010  | 1.802 | 0.185   | 18.549  | 383.14 | --             | Open Sea | Intergenic   |
| chrt4 | 88,626,313 | 1.37E-02 | 7.25E-02 | 0.833  | 83.333 | 0.634  | 63.380 | 0.106 | 10.565 | 2.113 | 0.143 | 14.326 | 2.865 | -0.200  | -19.953 | 384.14 | --             | Open Sea | Intergenic   |
| chrt4 | 88,627,093 | 1.85E-02 | 0.70E-02 | 0.360  | 36.000 | 0.530  | 53.000 | 0.137 | 13.684 | 3.361 | 0.230 | 2.360  | 3.361 | 0.354   | 3.370   | 384.14 | Check manually | Open Sea | Intergenic   |
| chrt4 | 89,723,126 | 2.36E-02 | 7.04E-03 | 0.343  | 34.286 | 0.544  | 54.386 | 0.170 | 17.050 | 3.410 | 0.084 | 8.436  | 1.687 | 0.201   | 20.100  | 384.14 | CA             | Open Sea | Intergenic   |
| chrt4 | 89,723,145 | 3.05E-02 | 7.04E-03 | 0.243  | 24.286 | 0.446  | 44.643 | 0.148 | 14.790 | 2.958 | 0.106 | 10.603 | 2.121 | 0.204   | 20.357  | 385.14 | AG             | Open Sea | Intergenic   |
| chrt4 | 92,481,233 | 1.27E-02 | 1.44E-02 | 0.769  | 76.923 | 0.893  | 89.256 | 0.053 | 5.275  | 1.055 | 0.059 | 5.895  | 1.179 | 0.123   | 12.333  | 386.14 | --             | Open Sea | Intergenic   |
| chrt4 | 92,482,014 | 3.24E-02 | 3.78E-02 | 0.451  | 45.140 | 0.787  | 78.723 | 0.152 | 15.243 | 3.124 | 0.049 | 4.966  | 2.479 | 0.219   | 21.860  | 386.14 | --             | Open Sea | Intergenic   |
| chrt4 | 93,521,119 | 1.67E-02 | 3.38E-06 | 0.203  | 20.339 | 0.443  | 44.262 | 0.116 | 11.583 | 2.317 | 0.245 | 24.540 | 4.908 | 0.239   | 23.923  | 387.14 | TG             | Open Sea | Intergenic   |
| chrt4 | 93,521,129 | 4.52E-02 | 1.93E-06 | 0.169  | 16.949 | 0.446  | 44.643 | 0.120 | 11.984 | 2.397 | 0.302 | 30.186 | 6.037 | 0.277   | 27.694  | 387.14 | TG             | Open Sea | Intergenic   |
| chrt4 | 93,521,146 | 3.59E-02 | 1.93E-06 | 0.153  | 15.254 | 0.383  | 38.298 | 0.087 | 8.671  | 1.734 | 0.282 | 28.223 | 5.645 | 0.230   | 23.044  | 387.14 | AG             | Open Sea | Intergenic   |
| chrt4 | 93,521,253 | 1.91E-02 | 1.91E-02 | 0.563  | 56.300 | 0.530  | 53.000 | 0.155 | 15.577 | 3.115 | 0.252 | 2.515  | 3.115 | 0.346   | 34.615  | 387.14 | CA             | Open Sea | Intergenic   |
| chrt4 | 94,112,261 | 4.22E-02 | 2.78E-01 | 0.368  | 36.842 | 0.613  | 61.290 | 0.317 | 31.650 | 6.330 | 0.099 | 9.919  | 1.984 | 0.244   | 24.448  | 388.14 | --             | Open Sea | Intergenic   |
| chrt4 | 94,112,484 | 1.05E-02 | 1.70E-01 | 0.657  | 65.741 | 0.827  | 82.727 | 0.101 | 10.067 | 2.013 | 0.111 | 11.132 | 2.226 | 0.170   | 16.987  | 388.14 | --             | Open Sea | Intergenic   |
| chrt4 | 96,898,334 | 4.08E-03 | 5.21E-04 | 0.494  | 49.351 | 0.734  | 73.438 | 0.106 | 10.581 | 2.116 | 0.064 | 6.363  | 1.273 | 0.241   | 24.087  | 389.14 | --             | Open Sea | Intergenic   |
| chrt4 | 96,898,390 | 5.87E-03 | 5.21E-04 | 0.494  | 49.351 | 0.734  | 73.438 | 0.106 | 10.581 | 2.116 | 0.064 | 6.363  | 1.273 | 0.241   | 24.087  | 389.14 | --             | Open Sea | Intergenic   |
| chrt4 | 97,592,972 | 4.56E-03 | 2.52E-03 | 0.328  | 32.759 | 0.635  | 63.462 | 0.109 | 10.908 | 2.182 | 0.144 | 14.367 | 2.873 | 0.307   | 30.703  | 390.14 | AA             |          |              |



|       |            |          |          |       |        |       |        |       |        |       |       |        |       |        |         |        |                |          |             |        |
|-------|------------|----------|----------|-------|--------|-------|--------|-------|--------|-------|-------|--------|-------|--------|---------|--------|----------------|----------|-------------|--------|
| dhrt5 | 7.252,637  | 1.94E-02 | 8.87E-01 | 0.178 | 17.778 | 0.517 | 51.724 | 0.184 | 18.387 | 3.997 | 0.212 | 21.164 | 4.233 | 0.339  | 33.946  | 407.15 | --             | Open Sea | Intron 8/21 | Egflam |
| dhrt5 | 7.252,637  | 1.94E-02 | 8.87E-01 | 0.178 | 17.778 | 0.517 | 51.724 | 0.184 | 18.387 | 3.977 | 0.212 | 21.164 | 4.233 | 0.339  | 33.946  | 407.15 | --             | Open Sea | Intron 8/22 | Egflam |
| dhrt5 | 7.252,991  | 8.76E-01 | 8.87E-01 | 0.262 | 68.152 | 0.897 | 89.744 | 0.262 | 68.152 | 0.897 | 0.262 | 68.152 | 0.897 | 0.262  | 68.152  | 407.15 | --             | Open Sea | Intron 8/21 | Egflam |
| dhrt5 | 7.252,991  | 8.76E-01 | 8.87E-01 | 0.262 | 68.152 | 0.897 | 89.744 | 0.262 | 68.152 | 0.897 | 0.262 | 68.152 | 0.897 | 0.262  | 68.152  | 407.15 | --             | Open Sea | Intron 8/22 | Egflam |
| dhrt5 | 7.338,533  | 7.66E-03 | 6.87E-03 | 0.351 | 35.135 | 0.676 | 67.568 | 0.303 | 30.262 | 6.052 | 0.196 | 19.572 | 3.914 | 0.324  | 32.432  | 408.15 | GC             | Open Sea | Intron 1/21 | Egflam |
| dhrt5 | 7.338,533  | 7.66E-03 | 6.87E-03 | 0.351 | 35.135 | 0.676 | 67.568 | 0.303 | 30.262 | 6.052 | 0.196 | 19.572 | 3.914 | 0.324  | 32.432  | 408.15 | GC             | Open Sea | Intron 1/22 | Egflam |
| dhrt5 | 7.338,590  | 5.15E-03 | 3.49E-02 | 0.436 | 43.590 | 0.758 | 75.758 | 0.436 | 43.590 | 0.758 | 0.436 | 43.590 | 0.758 | 0.436  | 43.590  | 408.15 | GG             | Open Sea | Intron 1/21 | Egflam |
| dhrt5 | 7.338,590  | 5.15E-03 | 3.49E-02 | 0.436 | 43.590 | 0.758 | 75.758 | 0.436 | 43.590 | 0.758 | 0.436 | 43.590 | 0.758 | 0.436  | 43.590  | 408.15 | GG             | Open Sea | Intron 1/22 | Egflam |
| dhrt5 | 8.881,216  | 2.26E-02 | 5.13E-01 | 0.864 | 86.441 | 0.696 | 69.565 | 0.106 | 10.567 | 2.113 | 0.163 | 16.344 | 3.269 | -0.169 | -18.875 | 409.15 | CG nearby      | Open Sea | Intergenic  |        |
| dhrt5 | 8.881,917  | 4.08E-02 | 2.22E-02 | 0.217 | 21.739 | 0.513 | 51.282 | 0.307 | 30.700 | 6.140 | 0.154 | 15.384 | 3.077 | 0.295  | 29.543  | 409.15 | CA             | Open Sea | Intergenic  |        |
| dhrt5 | 13.384,829 | 1.93E-02 | 1.97E-02 | 0.282 | 28.167 | 0.600 | 60.000 | 0.282 | 28.167 | 0.600 | 0.153 | 0.153  | 0.600 | 0.308  | 30.833  | 410.15 | --             | Open Sea | Intergenic  |        |
| dhrt5 | 13.385,438 | 3.55E-02 | 5.57E-02 | 0.528 | 52.778 | 0.756 | 75.611 | 0.247 | 24.745 | 4.949 | 0.081 | 8.088  | 1.618 | 0.228  | 22.832  | 410.15 | CG             | Open Sea | Intergenic  |        |
| dhrt5 | 14.832,438 | 4.91E-02 | 2.00E-03 | 0.522 | 52.174 | 0.826 | 82.609 | 0.294 | 29.359 | 5.872 | 0.157 | 15.713 | 3.143 | 0.304  | 30.435  | 411.15 | --             | Open Sea | Intergenic  |        |
| dhrt5 | 14.832,443 | 2.37E-02 | 2.00E-03 | 0.417 | 41.867 | 0.826 | 82.609 | 0.319 | 31.910 | 6.382 | 0.217 | 21.654 | 4.331 | 0.409  | 40.942  | 411.15 | --             | Open Sea | Intergenic  |        |
| dhrt5 | 15.330,510 | 4.63E-02 | 1.94E-01 | 0.817 | 81.692 | 0.819 | 81.808 | 0.176 | 17.586 | 3.511 | 0.131 | 13.098 | 2.620 | 0.142  | 14.235  | 412.15 | TA             | Open Sea | Intergenic  |        |
| dhrt5 | 15.330,649 | 3.18E-02 | 1.94E-01 | 0.343 | 34.286 | 0.600 | 60.000 | 0.195 | 19.492 | 3.898 | 0.313 | 31.320 | 6.264 | 0.257  | 25.714  | 412.15 | --             | Open Sea | Intergenic  |        |
| dhrt5 | 15.458,384 | 3.23E-02 | 1.06E-01 | 0.848 | 84.848 | 0.600 | 60.000 | 0.190 | 18.952 | 3.790 | 0.226 | 22.550 | 4.510 | -0.248 | -24.848 | 413.15 | --             | Open Sea | Intergenic  |        |
| dhrt5 | 15.459,493 | 3.68E-02 | 1.82E-01 | 0.429 | 42.857 | 0.675 | 67.500 | 0.247 | 24.725 | 4.945 | 0.230 | 23.033 | 4.607 | 0.246  | 24.643  | 413.15 | --             | Open Sea | Intergenic  |        |
| dhrt5 | 15.572,514 | 2.48E-02 | 2.65E-01 | 0.302 | 30.233 | 0.522 | 52.174 | 0.187 | 18.711 | 3.742 | 0.096 | 9.636  | 1.927 | 0.219  | 21.941  | 414.15 | --             | Open Sea | Intergenic  |        |
| dhrt5 | 15.572,836 | 2.54E-02 | 1.01E-01 | 0.537 | 53.704 | 0.746 | 74.603 | 0.271 | 27.141 | 5.428 | 0.154 | 15.431 | 3.086 | 0.209  | 20.899  | 414.15 | --             | Open Sea | Intergenic  |        |
| dhrt5 | 17.448,006 | 1.92E-02 | 1.92E-02 | 0.424 | 42.424 | 0.719 | 71.875 | 0.267 | 26.671 | 5.334 | 0.168 | 16.758 | 3.352 | 0.295  | 29.451  | 415.15 | --             | Open Sea | Intergenic  |        |
| dhrt5 | 17.448,375 | 2.42E-02 | 1.12E-01 | 0.462 | 46.214 | 0.691 | 68.116 | 0.063 | 6.332  | 1.266 | 0.102 | 10.200 | 2.040 | 0.199  | 19.902  | 415.15 | --             | Open Sea | Intergenic  |        |
| dhrt5 | 17.958,038 | 4.89E-02 | 1.93E-02 | 0.792 | 79.245 | 0.919 | 91.935 | 0.129 | 12.859 | 2.572 | 0.051 | 5.123  | 1.025 | 0.127  | 12.690  | 416.15 | --             | Open Sea | Intergenic  |        |
| dhrt5 | 17.958,856 | 4.07E-02 | 3.62E-01 | 0.407 | 40.678 | 0.600 | 60.000 | 0.209 | 20.910 | 4.182 | 0.174 | 17.402 | 3.480 | 0.193  | 19.322  | 416.15 | --             | Open Sea | Intergenic  |        |
| dhrt5 | 20.488,133 | 1.48E-03 | 9.34E-02 | 0.742 | 74.194 | 0.320 | 32.000 | 0.137 | 13.672 | 2.734 | 0.150 | 14.975 | 2.995 | -0.422 | -42.194 | 417.15 | AG             | Open Sea | Intergenic  |        |
| dhrt5 | 20.488,179 | 3.14E-02 | 9.34E-02 | 0.563 | 56.333 | 0.864 | 86.364 | 0.250 | 24.972 | 4.994 | 0.362 | 3.962  | 1.872 | 0.284  | 28.030  | 417.15 | CG             | Open Sea | Intergenic  |        |
| dhrt5 | 21.633,624 | 4.05E-02 | 4.05E-02 | 0.678 | 67.797 | 0.841 | 84.058 | 0.151 | 15.050 | 3.010 | 0.101 | 10.098 | 2.022 | 0.163  | 16.261  | 418.15 | TT             | Open Sea | Intergenic  |        |
| dhrt5 | 21.634,396 | 4.70E-02 | 1.54E-01 | 0.528 | 52.778 | 0.784 | 78.378 | 0.309 | 30.560 | 6.174 | 0.137 | 13.710 | 2.705 | 0.266  | 25.601  | 418.15 | CT             | Open Sea | Intergenic  |        |
| dhrt5 | 22.182,716 | 3.33E-02 | 1.07E-01 | 0.820 | 81.967 | 0.650 | 65.000 | 0.125 | 12.486 | 2.497 | 0.227 | 22.712 | 4.542 | -0.170 | -16.967 | 419.15 | --             | Open Sea | Intergenic  |        |
| dhrt5 | 22.183,615 | 1.21E-03 | 0.33E-03 | 0.243 | 24.333 | 0.455 | 45.455 | 0.127 | 12.678 | 2.990 | 0.232 | 23.719 | 4.545 | 0.279  | 24.719  | 419.15 | --             | Open Sea | Intergenic  |        |
| dhrt5 | 22.856,738 | 8.36E-03 | 4.08E-04 | 0.245 | 24.508 | 0.500 | 50.000 | 0.133 | 13.312 | 2.662 | 0.102 | 10.222 | 2.044 | 0.255  | 25.472  | 420.15 | --             | Open Sea | Intergenic  |        |
| dhrt5 | 22.856,742 | 2.79E-02 | 4.08E-04 | 0.380 | 38.000 | 0.620 | 62.000 | 0.141 | 14.092 | 2.818 | 0.228 | 22.781 | 4.556 | 0.240  | 24.000  | 420.15 | --             | Open Sea | Intergenic  |        |
| dhrt5 | 22.856,814 | 2.65E-02 | 4.08E-04 | 0.378 | 37.838 | 0.659 | 65.909 | 0.164 | 16.375 | 3.275 | 0.172 | 17.239 | 3.448 | 0.281  | 28.071  | 420.15 | --             | Open Sea | Intergenic  |        |
| dhrt5 | 23.017,380 | 9.63E-02 | 3.93E-02 | 0.584 | 58.412 | 0.726 | 72.600 | 0.232 | 23.786 | 4.568 | 0.230 | 23.526 | 2.878 | 0.285  | 28.788  | 421.15 | CG             | Open Sea | Intergenic  |        |
| dhrt5 | 23.017,724 | 3.17E-02 | 1.56E-02 | 0.585 | 58.491 | 0.788 | 78.846 | 0.210 | 21.003 | 4.201 | 0.151 | 15.068 | 3.014 | -0.204 | -20.356 | 421.15 | --             | Open Sea | Intergenic  |        |
| dhrt5 | 23.565,762 | 4.10E-02 | 3.22E-01 | 0.740 | 73.984 | 0.856 | 85.886 | 0.123 | 13.319 | 2.464 | 0.311 | 13.122 | 2.624 | 0.116  | 11.602  | 422.15 | --             | Open Sea | Intergenic  |        |
| dhrt5 | 23.565,974 | 2.13E-02 | 2.55E-01 | 0.487 | 48.718 | 0.237 | 23.684 | 0.246 | 24.638 | 4.928 | 0.125 | 12.511 | 2.502 | -0.250 | -25.034 | 422.15 | --             | Open Sea | Intergenic  |        |
| dhrt5 | 23.682,275 | 3.85E-02 | 0.68E-03 | 0.323 | 32.233 | 0.683 | 68.333 | 0.186 | 18.613 | 2.067 | 0.133 | 13.433 | 3.413 | 0.295  | 29.473  | 423.15 | --             | Open Sea | Intergenic  |        |
| dhrt5 | 23.682,484 | 4.97E-02 | 0.47E-02 | 0.646 | 64.583 | 0.820 | 82.000 | 0.200 | 20.006 | 4.001 | 0.126 | 12.590 | 2.518 | 0.174  | 17.417  | 423.15 | --             | Open Sea | Intergenic  |        |
| dhrt5 | 24.612,297 | 1.38E-02 | 0.82E-02 | 0.829 | 82.857 | 0.559 | 55.882 | 0.121 | 12.109 | 2.422 | 0.104 | 10.416 | 2.083 | -0.270 | -26.975 | 424.15 | --             | Open Sea | Intergenic  |        |
| dhrt5 | 24.612,915 | 3.81E-02 | 3.81E-02 | 0.569 | 56.897 | 0.755 | 75.472 | 0.103 | 10.270 | 2.054 | 0.060 | 5.965  | 1.193 | 0.186  | 18.575  | 424.15 | --             | Open Sea | Intergenic  |        |
| dhrt5 | 26.340,951 | 8.49E-03 | 8.49E-03 | 0.249 | 24.959 | 0.623 | 62.333 | 0.100 | 10.003 | 1.172 | 0.123 | 12.400 | 1.172 | 0.123  | 12.400  | 425.15 | AA             | Open Sea | Intergenic  |        |
| dhrt5 | 26.340,967 | 1.92E-02 | 8.49E-03 | 0.176 | 17.647 | 0.425 | 42.500 | 0.109 | 10.897 | 2.179 | 0.128 | 12.781 | 2.556 | 0.249  | 24.853  | 425.15 | Check manually | Open Sea | Intergenic  |        |
| dhrt5 | 26.715,636 | 4.52E-02 | 6.26E-03 | 0.623 | 62.614 | 0.804 | 80.435 | 0.199 | 19.916 | 3.983 | 0.182 | 18.221 | 3.644 | 0.182  | 18.171  | 426.15 | CA             | Open Sea | Intergenic  |        |
| dhrt5 | 26.715,702 | 4.51E-02 | 1.35E-01 | 0.490 | 48.980 | 0.756 | 75.610 | 0.287 | 28.739 | 5.748 | 0.196 | 19.551 | 3.910 | 0.266  | 26.630  | 426.15 | AG             | Open Sea | Intergenic  |        |
| dhrt5 | 29.564,034 | 4.05E-02 | 4.08E-03 | 0.215 | 21.500 | 0.333 | 33.333 | 0.157 | 15.307 | 1.713 | 0.146 | 14.607 | 2.583 | 0.281  | 25.833  | 427.15 | --             | Open Sea | Intergenic  |        |
| dhrt5 | 29.564,053 | 3.93E-02 | 4.98E-03 | 0.231 | 23.077 | 0.474 | 47.368 | 0.199 | 19.915 | 3.983 | 0.157 | 15.708 | 3.142 | 0.243  | 24.291  | 427.15 | --             | Open Sea | Intergenic  |        |
| dhrt5 | 31.945,846 | 3.16E-02 | 3.58E-02 | 0.881 | 88.095 | 0.592 | 59.184 | 0.094 | 9.362  | 1.872 | 0.262 | 26.239 | 5.248 | -0.289 | -28.912 | 428.15 | --             | Open Sea | Intergenic  |        |
| dhrt5 | 31.945,918 | 1.60E-02 | 3.58E-02 | 0.698 | 69.811 | 0.475 | 47.458 | 0.172 | 17.238 | 3.448 | 0.233 | 23.299 | 4.660 | -0.224 | -22.354 | 428.15 | --             | Open Sea | Intergenic  |        |
| dhrt5 | 40.782,425 | 3.07E-02 | 3.33E-02 | 0.815 | 81.579 | 0.589 | 58.824 | 0.087 | 8.663  | 3.378 | 0.302 | 3.750  | 2.560 | 0.258  | 25.755  | 429.15 | TA             | Open Sea | Intergenic  |        |
| dhrt5 | 40.782,534 | 2.22E-02 | 3.33E-02 | 0.815 | 81.481 | 0.533 | 53.333 | 0.129 | 12.942 | 2.588 | 0.096 | 9.603  | 1.921 | -0.281 | -28.148 | 429.15 | CG             | Open Sea | Intergenic  |        |
| dhrt5 | 40.895,084 | 4.70E-02 | 3.99E-04 | 0.400 | 40.000 | 0.676 | 67.647 | 0.238 | 23.813 | 4.763 | 0.193 | 19.273 | 3.855 | 0.276  | 27.647  | 430.15 | TA             | Open Sea | Intergenic  |        |
| dhrt5 | 40.895,098 | 7.30E-03 | 3.99E-04 | 0.293 | 29.268 | 0.606 | 60.606 | 0.138 | 13.800 | 2.760 | 0.156 | 15.563 | 3.113 | 0.313  | 31.338  | 430.15 | CG             | Open Sea | Intergenic  |        |
| dhrt5 | 40.895,132 | 1.20E-03 | 1.20E-03 | 0.417 | 41.661 | 0.650 | 65.000 | 0.141 | 14.053 | 2.388 | 0.166 | 16.614 | 2.333 | 0.154  | 15.404  | 430.15 | --             | Open Sea | Intergenic  |        |
| dhrt5 | 41.354,988 | 3.55E-02 | 7.86E-02 | 0.402 | 40.157 | 0.541 | 54.054 | 0.056 | 5.593  | 1.119 | 0.159 | 15.888 | 3.178 | 0.239  | 23.887  | 431.15 | ct             | Open Sea | Intergenic  |        |
| dhrt5 | 41.355,521 | 1.69E-02 | 1.69E-02 | 0.406 | 40.625 | 0.720 | 72.000 | 0.231 | 23.125 | 4.625 | 0.184 | 18.409 | 3.682 | 0.314  | 31.375  | 431.15 | CG             | Open Sea | Intergenic  |        |
| dhrt5 | 44.225,143 | 4.85E-02 | 4.85E-02 | 0.187 | 18.692 | 0.301 | 30.088 | 0.370 | 36.967 | 7.393 | 0.096 | 9.619  | 1.924 | 0.114  | 11.397  | 432.15 | --             | Open Sea | Intergenic  |        |
| dhrt5 | 44.225,483 | 7.24E-03 | 7.24E-03 | 0.697 | 69.737 | 0.454 | 45.454 | 0.168 | 16.517 | 2.336 | 0.146 | 14.614 | 2.329 | 0.     |         |        |                |          |             |        |



|       |            |          |          |       |        |       |        |       |        |       |       |        |       |        |         |         |                |                |              |            |  |
|-------|------------|----------|----------|-------|--------|-------|--------|-------|--------|-------|-------|--------|-------|--------|---------|---------|----------------|----------------|--------------|------------|--|
| dhrt5 | 88,145,774 | 3.80E-02 | 5.14E-01 | 0.541 | 54,054 | 0.771 | 77,143 | 0.273 | 27,309 | 5.462 | 0.156 | 15,646 | 3.129 | 0.231  | 23,089  | 456, 15 | --             | Open Sea       | Intergenic   |            |  |
| dhrt5 | 88,146,144 | 3.87E-02 | 2.58E-01 | 0.700 | 70,000 | 0.381 | 38,095 | 0.242 | 24,184 | 4.837 | 0.281 | 28,085 | 5.617 | -0.319 | -31,905 | 456, 15 | --             | Open Sea       | Intergenic   |            |  |
| dhrt5 | 89,516,581 | 1.21E-02 | 1.11E-03 | 0.200 | 20,000 | 0.517 | 51,123 | 0.153 | 15,654 | 3.171 | 0.171 | 17,454 | 5.691 | 0.171  | 17,454  | 457, 15 | --             | Open Sea       | Intergenic   | Shank3     |  |
| dhrt5 | 89,516,581 | 3.21E-02 | 1.11E-03 | 0.200 | 20,000 | 0.517 | 51,124 | 0.159 | 15,857 | 3.171 | 0.275 | 27,454 | 5.491 | 0.317  | 31,724  | 457, 15 | --             | Open Sea       | Intron 7/17  | Shank3     |  |
| dhrt5 | 89,516,581 | 3.21E-02 | 1.11E-03 | 0.200 | 20,000 | 0.517 | 51,124 | 0.159 | 15,857 | 3.171 | 0.275 | 27,454 | 5.491 | 0.317  | 31,724  | 457, 15 | --             | Open Sea       | Intron 9/21  | Shank3     |  |
| dhrt5 | 89,516,600 | 1.83E-02 | 1.11E-03 | 0.357 | 35,714 | 0.688 | 68,750 | 0.145 | 14,518 | 2,904 | 0.230 | 23,006 | 4.601 | 0.330  | 33,036  | 457, 15 | --             | Open Sea       | Intron 9/21  | Shank3     |  |
| dhrt5 | 89,516,600 | 1.83E-02 | 1.11E-03 | 0.357 | 35,714 | 0.688 | 68,750 | 0.145 | 14,518 | 2,904 | 0.230 | 23,006 | 4.601 | 0.330  | 33,036  | 457, 15 | --             | Open Sea       | Intron 9/21  | Shank3     |  |
| dhrt5 | 89,516,600 | 1.83E-02 | 1.11E-03 | 0.357 | 35,714 | 0.688 | 68,750 | 0.145 | 14,518 | 2,904 | 0.230 | 23,006 | 4.601 | 0.330  | 33,036  | 457, 15 | --             | Open Sea       | Intron 9/21  | Shank3     |  |
| dhrt5 | 90,835,843 | 1.93E-02 | 3.42E-04 | 0.231 | 23,077 | 0.533 | 53,333 | 0.159 | 15,882 | 3,176 | 0.354 | 35,355 | 7,071 | 0.303  | 30,256  | 458, 15 | tg             | Open Sea       | Intergenic   |            |  |
| dhrt5 | 90,835,863 | 4.26E-02 | 1.52E-03 | 0.364 | 36,364 | 0.690 | 68,666 | 0.253 | 25,276 | 5,055 | 0.383 | 38,301 | 7,660 | 0.326  | 32,602  | 458, 15 | --             | CG nearby      | Intergenic   |            |  |
| dhrt5 | 93,107,926 | 1.43E-02 | 3.05E-03 | 0.194 | 19,350 | 0.432 | 43,266 | 0.180 | 18,049 | 3,610 | 0.227 | 22,742 | 3,896 | 0.246  | 24,560  | 461, 15 | ct             | Open Sea       | Intergenic   |            |  |
| dhrt5 | 93,107,926 | 4.29E-02 | 1.05E-01 | 0.696 | 69,643 | 0.873 | 87,302 | 0.179 | 17,940 | 3,588 | 0.127 | 12,659 | 2,532 | 0.172  | 17,659  | 459, 15 | --             | Open Sea       | Intergenic   |            |  |
| dhrt5 | 93,108,029 | 4.61E-02 | 2.18E-02 | 0.763 | 76,316 | 0.892 | 89,189 | 0.363 | 36,298 | 7,260 | 0.072 | 7,245  | 1,449 | 0.129  | 12,873  | 459, 15 | --             | Open Sea       | Intergenic   |            |  |
| dhrt5 | 93,108,839 | 3.74E-03 | 6.49E-01 | 0.868 | 86,792 | 0.603 | 60,345 | 0.100 | 9,956  | 1,991 | 0.152 | 15,227 | 3,045 | -0.264 | -28,448 | 459, 15 | --             | Open Sea       | Intergenic   |            |  |
| dhrt5 | 93,879,871 | 2.05E-02 | 1.57E-03 | 0.147 | 14,724 | 0.657 | 67,234 | 0.095 | 9,486  | 1,897 | 0.107 | 10,743 | 2,149 | -0.215 | -21,520 | 460, 15 | CG nearby      | Open Sea       | Intergenic   |            |  |
| dhrt5 | 93,880,005 | 1.20E-02 | 1.57E-03 | 0.778 | 77,778 | 0.533 | 53,333 | 0.156 | 15,564 | 3,113 | 0.173 | 17,331 | 3,466 | -0.244 | -24,444 | 460, 15 | --             | Check manually | Open Sea     | Intergenic |  |
| dhrt5 | 93,880,024 | 1.98E-02 | 1.57E-03 | 0.698 | 69,841 | 0.492 | 49,153 | 0.160 | 15,994 | 3,199 | 0.145 | 14,521 | 2,904 | -0.207 | -20,689 | 460, 15 | AG             | Open Sea       | Intergenic   | Scarf1     |  |
| dhrt5 | 96,457,382 | 3.42E-02 | 9.82E-03 | 0.184 | 18,421 | 0.412 | 41,176 | 0.224 | 22,361 | 4,472 | 0.197 | 19,659 | 3,932 | 0.228  | 22,755  | 461, 15 | ac             | Open Sea       | Intron 1/14  | Scarf1     |  |
| dhrt5 | 96,457,437 | 2.83E-02 | 9.82E-03 | 0.314 | 31,373 | 0.559 | 55,832 | 0.321 | 32,088 | 5,418 | 0.140 | 13,989 | 2,794 | 0.246  | 24,560  | 461, 15 | ct             | Open Sea       | Intergenic   |            |  |
| dhrt5 | 96,676,842 | 4.69E-02 | 2.70E-01 | 0.179 | 17,949 | 0.438 | 43,750 | 0.099 | 9,927  | 1,985 | 0.396 | 39,631 | 7,926 | 0.258  | 25,801  | 462, 15 | ct             | Open Sea       | Intergenic   |            |  |
| dhrt5 | 96,676,844 | 1.61E-02 | 2.70E-01 | 0.179 | 17,949 | 0.441 | 44,118 | 0.128 | 12,824 | 2,565 | 0.164 | 16,404 | 3,281 | 0.262  | 26,169  | 462, 15 | ct             | Open Sea       | Intergenic   |            |  |
| dhrt5 | 3,458,114  | 4.55E-02 | 3.61E-03 | 0.398 | 39,837 | 0.547 | 54,676 | 0.050 | 5,023  | 1,006 | 0.191 | 19,116 | 3,223 | 0.148  | 14,839  | 463, 16 | CG nearby      | Open Sea       | Intergenic   |            |  |
| dhrt5 | 3,468,258  | 1.67E-02 | 3.61E-03 | 0.506 | 50,649 | 0.700 | 70,000 | 0.238 | 23,781 | 4,756 | 0.089 | 9,936  | 1,985 | 0.194  | 19,351  | 463, 16 | --             | Open Sea       | Intergenic   |            |  |
| dhrt5 | 5,503,364  | 1.82E-02 | 1.97E-02 | 0.500 | 50,000 | 0.458 | 45,833 | 0.168 | 16,833 | 3,367 | 0.262 | 26,212 | 5,242 | -0.333 | -33,333 | 464, 16 | CG nearby      | Open Sea       | Intergenic   |            |  |
| dhrt5 | 5,503,388  | 3.17E-02 | 2.11E-03 | 0.619 | 61,905 | 0.308 | 30,769 | 0.376 | 37,593 | 7,519 | 0.162 | 16,178 | 3,236 | -0.311 | -31,136 | 464, 16 | CA             | Open Sea       | Intergenic   |            |  |
| dhrt5 | 7,252,054  | 1.21E-05 | 0.20E-02 | 0.208 | 20,833 | 0.464 | 46,377 | 0.153 | 15,330 | 3,066 | 0.066 | 6,558  | 1,312 | 0.255  | 25,543  | 465, 16 | --             | Open Sea       | Intergenic   |            |  |
| dhrt5 | 7,252,118  | 3.01E-02 | 1.78E-06 | 0.152 | 15,152 | 0.191 | 19,152 | 0.159 | 15,149 | 3,830 | 0.131 | 13,999 | 2,628 | 0.199  | 19,351  | 465, 16 | Check manually | Open Sea       | Intergenic   |            |  |
| dhrt5 | 10,031,725 | 3.30E-03 | 4.67E-03 | 0.233 | 23,256 | 0.622 | 62,162 | 0.180 | 18,049 | 3,610 | 0.227 | 22,742 | 3,896 | 0.246  | 24,560  | 466, 16 | --             | Open Sea       | Intergenic   |            |  |
| dhrt5 | 10,031,757 | 2.81E-02 | 4.67E-03 | 0.429 | 42,857 | 0.710 | 70,988 | 0.268 | 26,750 | 5,350 | 0.167 | 16,741 | 3,348 | 0.281  | 28,111  | 466, 16 | --             | Open Sea       | Intergenic   |            |  |
| dhrt5 | 19,432,054 | 4.12E-02 | 4.09E-01 | 0.617 | 61,644 | 0.873 | 87,302 | 0.179 | 17,940 | 3,588 | 0.127 | 12,659 | 2,532 | 0.172  | 17,659  | 467, 16 | --             | Open Sea       | Intergenic   |            |  |
| dhrt5 | 19,433,339 | 4.08E-02 | 4.09E-01 | 0.617 | 61,644 | 0.873 | 87,302 | 0.179 | 17,940 | 3,588 | 0.127 | 12,659 | 2,532 | 0.172  | 17,659  | 467, 16 | --             | Open Sea       | Intergenic   |            |  |
| dhrt5 | 25,744,522 | 4.58E-02 | 5.82E-03 | 0.500 | 50,000 | 0.783 | 78,261 | 0.357 | 35,714 | 7,143 | 0.209 | 20,917 | 4,183 | 0.283  | 28,261  | 468, 16 | CT             | Open Sea       | Intergenic   |            |  |
| dhrt5 | 25,744,640 | 3.82E-03 | 3.03E-02 | 0.280 | 28,000 | 0.739 | 79,913 | 0.131 | 13,139 | 2,628 | 0.278 | 27,827 | 5,565 | 0.459  | 45,913  | 468, 16 | AG             | Open Sea       | Intergenic   |            |  |
| dhrt5 | 29,878,105 | 4.26E-02 | 4.09E-01 | 0.617 | 61,644 | 0.873 | 87,302 | 0.179 | 17,940 | 3,588 | 0.127 | 12,659 | 2,532 | 0.172  | 17,659  | 469, 16 | --             | Open Sea       | Intergenic   |            |  |
| dhrt5 | 29,878,113 | 1.78E-02 | 2.87E-02 | 0.519 | 51,852 | 0.733 | 73,333 | 0.112 | 11,554 | 2,231 | 0.162 | 16,178 | 3,236 | 0.215  | 21,481  | 469, 16 | --             | Open Sea       | Intergenic   |            |  |
| dhrt5 | 29,878,129 | 4.39E-02 | 6.43E-02 | 0.581 | 58,108 | 0.740 | 74,026 | 0.084 | 8,385  | 1,677 | 0.153 | 15,310 | 3,062 | 0.159  | 15,918  | 469, 16 | --             | Open Sea       | Intergenic   |            |  |
| dhrt5 | 32,736,947 | 1.06E-02 | 8.09E-04 | 0.388 | 38,776 | 0.684 | 68,421 | 0.233 | 23,301 | 4,660 | 0.198 | 19,805 | 3,961 | 0.296  | 29,646  | 470, 16 | CG nearby      | Open Sea       | Intron 1/24  | Muc4       |  |
| dhrt5 | 32,736,954 | 8.09E-04 | 8.09E-04 | 0.388 | 38,776 | 0.684 | 68,421 | 0.233 | 23,301 | 4,660 | 0.198 | 19,805 | 3,961 | 0.296  | 29,646  | 470, 16 | CG nearby      | Open Sea       | Intron 1/24  | Muc4       |  |
| dhrt5 | 32,736,958 | 1.91E-02 | 8.09E-04 | 0.375 | 37,500 | 0.647 | 64,706 | 0.160 | 16,030 | 3,206 | 0.241 | 24,080 | 4,816 | 0.272  | 27,206  | 470, 16 | CG nearby      | Open Sea       | Intron 1/24  | Muc4       |  |
| dhrt5 | 33,629,830 | 2.33E-02 | 3.27E-04 | 0.237 | 23,684 | 0.486 | 48,649 | 0.158 | 15,759 | 3,152 | 0.164 | 16,355 | 3,271 | 0.250  | 24,964  | 471, 16 | --             | Open Sea       | Intron 10/13 | Slc12a8    |  |
| dhrt5 | 33,629,835 | 3.19E-02 | 3.27E-04 | 0.270 | 27,027 | 0.513 | 51,282 | 0.188 | 18,837 | 3,767 | 0.169 | 16,919 | 3,384 | 0.243  | 24,255  | 471, 16 | --             | Open Sea       | Intron 10/13 | Slc12a8    |  |
| dhrt5 | 34,069,182 | 2.67E-02 | 8.37E-02 | 0.713 | 71,269 | 0.733 | 73,333 | 0.112 | 11,554 | 2,231 | 0.162 | 16,178 | 3,236 | 0.215  | 21,481  | 472, 16 | AG             | Open Sea       | Intergenic   |            |  |
| dhrt5 | 34,069,192 | 1.04E-02 | 8.37E-02 | 0.214 | 21,374 | 0.476 | 47,581 | 0.042 | 4,156  | 833   | 0.199 | 19,884 | 3,977 | 0.282  | 26,207  | 472, 16 | --             | Open Sea       | Intergenic   |            |  |
| dhrt5 | 36,804,182 | 2.78E-02 | 7.98E-02 | 0.388 | 38,776 | 0.619 | 61,905 | 0.117 | 11,738 | 2,348 | 0.270 | 26,967 | 5,383 | 0.231  | 23,129  | 473, 16 | Check manually | Open Sea       | Intergenic   |            |  |
| dhrt5 | 36,804,279 | 1.66E-02 | 5.30E-04 | 0.645 | 64,516 | 0.839 | 83,929 | 0.068 | 6,835  | 1,367 | 0.183 | 18,307 | 3,661 | 0.194  | 19,412  | 473, 16 | Check manually | Open Sea       | Intergenic   |            |  |
| dhrt5 | 36,804,472 | 2.87E-02 | 2.99E-02 | 0.489 | 48,855 | 0.685 | 68,666 | 0.089 | 8,855  | 1,773 | 0.103 | 10,743 | 2,149 | 0.129  | 12,855  | 473, 16 | CA             | Open Sea       | Intergenic   |            |  |
| dhrt5 | 37,334,630 | 1.82E-02 | 3.71E-02 | 0.837 | 83,721 | 0.596 | 59,615 | 0.109 | 10,855 | 2,171 | 0.195 | 19,539 | 3,908 | -0.241 | -24,106 | 474, 16 | --             | Open Sea       | Intron 3/26  | Stxbp5l    |  |
| dhrt5 | 37,334,630 | 1.82E-02 | 3.71E-02 | 0.837 | 83,721 | 0.596 | 59,615 | 0.109 | 10,855 | 2,171 | 0.195 | 19,539 | 3,908 | -0.241 | -24,106 | 474, 16 | --             | Open Sea       | Intron 3/27  | Stxbp5l    |  |
| dhrt5 | 37,335,074 | 1.38E-02 | 1.38E-02 | 0.839 | 83,929 | 0.590 | 59,674 | 0.089 | 8,855  | 1,770 | 0.303 | 30,292 | 6,058 | -0.250 | -24,954 | 474, 16 | --             | Open Sea       | Intron 3/26  | Stxbp5l    |  |
| dhrt5 | 37,335,074 | 1.38E-02 | 1.38E-02 | 0.839 | 83,929 | 0.590 | 59,674 | 0.089 | 8,855  | 1,770 | 0.303 | 30,292 | 6,058 | -0.250 | -24,954 | 474, 16 | --             | Open Sea       | Intron 3/27  | Stxbp5l    |  |
| dhrt5 | 38,282,077 | 3.81E-02 | 3.66E-01 | 0.605 | 60,465 | 0.800 | 80,000 | 0.223 | 22,293 | 4,459 | 0.371 | 37,091 | 7,418 | 0.195  | 19,535  | 475, 16 | AG             | Open Sea       | Intergenic   |            |  |
| dhrt5 | 38,282,334 | 2.64E-02 | 6.63E-02 | 0.633 | 63,253 | 0.753 | 75,258 | 0.158 | 15,840 | 3,160 | 0.055 | 5,470  | 1,094 | 0.120  | 12,005  | 475, 16 | --             | Open Sea       | Intergenic   |            |  |
| dhrt5 | 38,488,102 | 3.39E-03 | 9.88E-02 | 0.348 | 34,783 | 0.698 | 69,767 | 0.381 | 38,102 | 7,620 | 0.092 | 9,234  | 1,847 | 0.350  | 34,985  | 476, 16 | CA             | Open Sea       | Intergenic   |            |  |
| dhrt5 | 38,488,161 | 4.51E-02 | 4.61E-01 | 0.824 | 82,416 | 0.873 | 87,302 | 0.179 | 17,940 | 3,588 | 0.127 | 12,659 | 2,532 | 0.172  | 17,659  | 476, 16 | --             | Open Sea       | Intergenic   |            |  |
| dhrt5 | 40,101,720 | 1.29E-02 | 2.03E-03 | 0.500 | 50,000 | 0.219 | 21,875 | 0.250 | 25,006 | 5,001 | 0.217 | 21,731 | 4,346 | -0.281 | -28,125 | 477, 16 | --             | Open Sea       | Intergenic   |            |  |
| dhrt5 | 40,101,847 | 3.17E-02 | 2.03E-03 | 0.617 | 61,702 | 0.864 | 86,364 | 0.338 | 33,821 | 6,764 | 0.311 | 13,087 | 2,617 | 0.247  | 24,662  | 477, 16 | --             | Open Sea       | Intergenic   |            |  |
| dhrt5 | 40,157,161 | 3.78E-02 | 3.78E-02 | 0.738 | 73,810 | 0.500 | 50,000 | 0.333 | 33,361 | 6,652 | 0.307 | 30,744 | 6,149 | -0.238 | -23,810 | 478, 16 | TA             | Open Sea       | Intergenic   |            |  |
| dhrt5 | 40,15      |          |          |       |        |       |        |       |        |       |       |        |       |        |         |         |                |                |              |            |  |



|       |            |          |          |       |        |       |        |       |        |       |       |        |       |        |         |        |                |          |            |
|-------|------------|----------|----------|-------|--------|-------|--------|-------|--------|-------|-------|--------|-------|--------|---------|--------|----------------|----------|------------|
| chr16 | 62,082,765 | 3.37E-02 | 5.16E-03 | 0.635 | 63.462 | 0.814 | 81.356 | 0.110 | 10.977 | 2.195 | 0.100 | 10.012 | 2.002 | 0.179  | 17.894  | 500.16 | --             | Open Sea | Intergenic |
| chr16 | 62,082,821 | 3.01E-02 | 5.16E-03 | 0.475 | 47.500 | 0.700 | 70.000 | 0.248 | 24.783 | 4.957 | 0.132 | 13.211 | 2.642 | 0.225  | 22.500  | 500.16 | --             | Open Sea | Intergenic |
| chr16 | 63,531,835 | 9.33E-04 | 9.40E-04 | 0.407 | 40.634 | 0.407 | 40.634 | 0.407 | 9.732  | 0.211 | 0.940 | 0.091  | 0.940 | 0.211  | 22.702  | 501.16 | --             | Open Sea | Intergenic |
| chr16 | 63,532,039 | 8.24E-03 | 1.47E-02 | 0.695 | 69.492 | 0.899 | 89.855 | 0.214 | 21.411 | 4.282 | 0.071 | 7.081  | 1.416 | 0.204  | 20.364  | 501.16 | --             | Open Sea | Intergenic |
| chr16 | 64,056,451 | 4.64E-02 | 8.03E-01 | 0.581 | 58.065 | 0.795 | 79.545 | 0.227 | 22.703 | 4.541 | 0.157 | 15.738 | 3.148 | 0.215  | 21.481  | 502.16 | --             | Open Sea | Intergenic |
| chr16 | 64,057,335 | 2.96E-02 | 2.61E-01 | 0.559 | 55.882 | 0.818 | 81.818 | 0.248 | 24.795 | 4.959 | 0.138 | 13.842 | 2.768 | 0.259  | 25.936  | 502.16 | CA             | Open Sea | Intergenic |
| chr16 | 64,650,369 | 6.16E-02 | 6.16E-02 | 0.485 | 48.276 | 0.485 | 48.276 | 0.208 | 20.766 | 4.583 | 0.248 | 24.766 | 4.583 | 0.248  | 25.485  | 503.16 | CA             | Open Sea | Intergenic |
| chr16 | 64,650,857 | 3.23E-02 | 3.23E-02 | 0.810 | 80.952 | 0.604 | 60.417 | 0.137 | 13.663 | 2.733 | 0.076 | 7.586  | 1.517 | -0.205 | -20.536 | 503.16 | TT             | Open Sea | Intergenic |
| chr16 | 65,550,860 | 4.34E-02 | 6.91E-06 | 0.483 | 48.276 | 0.762 | 76.190 | 0.244 | 24.424 | 4.885 | 0.234 | 23.395 | 4.679 | 0.279  | 27.915  | 504.16 | CA             | Open Sea | Intron 2/5 |
| chr16 | 65,550,871 | 3.84E-02 | 6.91E-06 | 0.429 | 42.857 | 0.739 | 73.913 | 0.258 | 25.838 | 5.168 | 0.271 | 27.075 | 5.415 | 0.311  | 31.056  | 504.16 | TC             | Open Sea | Intron 2/5 |
| chr16 | 65,691,083 | 1.45E-02 | 5.44E-05 | 0.485 | 48.276 | 0.345 | 34.581 | 0.145 | 14.453 | 2.261 | 0.145 | 14.453 | 2.261 | 0.281  | 28.144  | 505.16 | CA             | Open Sea | Intergenic |
| chr16 | 65,691,203 | 1.71E-02 | 1.21E-01 | 0.160 | 16.000 | 0.481 | 48.148 | 0.131 | 13.060 | 2.612 | 0.145 | 14.487 | 2.897 | 0.321  | 32.148  | 505.16 | TC             | Open Sea | Intergenic |
| chr16 | 66,087,685 | 2.62E-02 | 1.72E-03 | 0.426 | 42.553 | 0.648 | 64.815 | 0.262 | 26.185 | 5.237 | 0.132 | 13.209 | 2.642 | 0.223  | 22.262  | 506.16 | --             | Open Sea | Intergenic |
| chr16 | 66,087,725 | 1.16E-02 | 1.13E-03 | 0.385 | 38.462 | 0.660 | 66.000 | 0.211 | 21.121 | 4.224 | 0.131 | 13.122 | 2.624 | 0.275  | 27.538  | 506.16 | --             | Open Sea | Intergenic |
| chr16 | 66,088,237 | 1.66E-02 | 1.66E-02 | 0.602 | 60.207 | 0.565 | 56.522 | 0.208 | 20.787 | 4.157 | 0.280 | 28.048 | 4.157 | 0.287  | 29.685  | 506.16 | --             | Open Sea | Intergenic |
| chr16 | 67,431,311 | 4.24E-02 | 2.89E-01 | 0.722 | 72.222 | 0.872 | 87.209 | 0.071 | 7.111  | 1.422 | 0.124 | 12.363 | 2.473 | 0.150  | 14.987  | 507.16 | --             | Open Sea | Intergenic |
| chr16 | 67,431,568 | 4.07E-02 | 1.17E-01 | 0.621 | 62.069 | 0.346 | 34.615 | 0.220 | 21.979 | 4.396 | 0.115 | 11.521 | 2.304 | -0.275 | -27.454 | 507.16 | --             | Open Sea | Intergenic |
| chr16 | 67,985,903 | 1.25E-02 | 1.49E-02 | 0.586 | 58.601 | 0.804 | 80.357 | 0.132 | 13.186 | 2.633 | 0.137 | 13.705 | 2.741 | 0.218  | 21.786  | 508.16 | --             | Open Sea | Intergenic |
| chr16 | 67,985,981 | 1.89E-02 | 1.49E-02 | 0.720 | 72.000 | 0.500 | 50.000 | 0.107 | 10.697 | 0.084 | 0.084 | 0.376  | 1.275 | -0.220 | -22.000 | 508.16 | --             | Open Sea | Intergenic |
| chr16 | 68,074,926 | 2.03E-02 | 4.43E-03 | 0.712 | 71.233 | 0.875 | 87.500 | 0.143 | 14.329 | 2.866 | 0.101 | 10.114 | 2.023 | 0.163  | 16.267  | 509.16 | --             | Open Sea | Intergenic |
| chr16 | 68,075,029 | 1.55E-02 | 3.61E-02 | 0.281 | 28.125 | 0.655 | 65.517 | 0.220 | 21.979 | 4.396 | 0.202 | 20.176 | 4.035 | 0.374  | 37.392  | 509.16 | --             | Open Sea | Intergenic |
| chr16 | 68,863,392 | 3.17E-02 | 1.01E-02 | 0.669 | 66.939 | 0.201 | 20.132 | 0.149 | 14.878 | 2.976 | 0.043 | 4.345  | 0.069 | 0.112  | 11.193  | 510.16 | CT             | Open Sea | Intergenic |
| chr16 | 68,863,400 | 3.35E-02 | 1.01E-02 | 0.744 | 74.436 | 0.850 | 84.967 | 0.124 | 12.886 | 2.477 | 0.127 | 12.665 | 2.533 | 0.105  | 10.531  | 510.16 | --             | Open Sea | Intergenic |
| chr16 | 69,238,334 | 4.57E-03 | 8.73E-03 | 0.720 | 72.000 | 0.304 | 30.435 | 0.217 | 21.731 | 4.346 | 0.219 | 21.947 | 4.389 | -0.416 | -41.565 | 511.16 | TG             | Open Sea | Intergenic |
| chr16 | 69,238,431 | 3.28E-02 | 1.19E-03 | 0.800 | 80.000 | 0.522 | 52.174 | 0.146 | 14.617 | 2.923 | 0.297 | 29.725 | 5.945 | -0.278 | -27.826 | 511.16 | --             | Open Sea | Intergenic |
| chr16 | 72,017,042 | 1.21E-02 | 1.39E-01 | 0.300 | 30.000 | 0.667 | 66.667 | 0.247 | 24.746 | 4.829 | 0.122 | 12.247 | 4.349 | 0.367  | 36.667  | 512.16 | --             | Open Sea | Intergenic |
| chr16 | 72,017,493 | 1.91E-02 | 1.91E-02 | 0.818 | 81.818 | 0.564 | 56.410 | 0.122 | 12.212 | 2.442 | 0.062 | 6.173  | 1.235 | -0.254 | -25.408 | 512.16 | --             | Open Sea | Intergenic |
| chr16 | 72,545,989 | 6.13E-03 | 1.38E-03 | 0.352 | 35.185 | 0.652 | 65.217 | 0.214 | 21.364 | 3.273 | 0.364 | 36.352 | 7.270 | 0.300  | 30.032  | 513.16 | TG             | Open Sea | Intergenic |
| chr16 | 72,546,000 | 3.93E-02 | 1.38E-03 | 0.358 | 35.849 | 0.563 | 56.250 | 0.183 | 18.324 | 3.665 | 0.255 | 25.496 | 5.099 | 0.204  | 20.401  | 513.16 | CT             | Open Sea | Intergenic |
| chr16 | 72,546,003 | 1.39E-02 | 1.39E-02 | 0.436 | 43.638 | 0.160 | 16.038 | 0.294 | 29.292 | 3.294 | 0.294 | 29.292 | 3.294 | 0.212  | 21.237  | 513.16 | TC             | Open Sea | Intergenic |
| chr16 | 78,154,896 | 3.01E-02 | 1.86E-01 | 0.615 | 61.538 | 0.862 | 86.207 | 0.209 | 20.855 | 4.171 | 0.089 | 8.832  | 1.966 | 0.247  | 24.668  | 514.16 | TG             | Open Sea | Intergenic |
| chr16 | 78,154,950 | 4.45E-02 | 8.65E-02 | 0.486 | 48.649 | 0.725 | 72.500 | 0.296 | 29.579 | 5.916 | 0.172 | 17.162 | 3.432 | 0.239  | 23.851  | 514.16 | TA             | Open Sea | Intergenic |
| chr16 | 78,522,593 | 2.75E-02 | 7.64E-02 | 0.514 | 51.429 | 0.756 | 75.556 | 0.244 | 24.398 | 4.880 | 0.089 | 8.858  | 1.772 | 0.241  | 24.127  | 515.16 | CC             | Open Sea | Intergenic |
| chr16 | 78,523,145 | 3.74E-02 | 7.98E-02 | 0.726 | 72.603 | 0.514 | 51.429 | 0.126 | 12.688 | 2.337 | 0.177 | 17.702 | 3.640 | -0.173 | -17.298 | 515.16 | --             | Open Sea | Intergenic |
| chr16 | 78,523,149 | 1.86E-02 | 7.98E-02 | 0.814 | 81.429 | 0.641 | 64.130 | 0.187 | 18.687 | 2.337 | 0.177 | 17.702 | 3.640 | -0.173 | -17.298 | 515.16 | --             | Open Sea | Intergenic |
| chr16 | 79,102,763 | 1.43E-02 | 7.44E-02 | 0.608 | 60.811 | 0.823 | 82.258 | 0.186 | 18.596 | 3.719 | 0.115 | 11.484 | 2.297 | 0.212  | 21.447  | 516.16 | --             | Open Sea | Intergenic |
| chr16 | 79,103,626 | 2.23E-02 | 4.35E-02 | 0.382 | 38.235 | 0.667 | 66.667 | 0.153 | 15.348 | 3.070 | 0.178 | 17.753 | 3.551 | 0.284  | 28.431  | 516.16 | TG             | Open Sea | Intergenic |
| chr16 | 79,746,504 | 1.48E-03 | 1.56E-03 | 0.667 | 66.667 | 0.170 | 17.000 | 0.083 | 8.303  | 1.653 | 0.083 | 8.303  | 1.653 | 0.083  | 8.303   | 517.16 | CT             | Open Sea | Intergenic |
| chr16 | 79,747,401 | 2.67E-02 | 1.32E-01 | 0.754 | 75.439 | 0.508 | 50.847 | 0.136 | 13.804 | 2.721 | 0.214 | 21.431 | 4.286 | -0.246 | -24.591 | 517.16 | --             | Open Sea | Intergenic |
| chr16 | 80,055,754 | 3.37E-02 | 7.92E-03 | 0.288 | 28.846 | 0.486 | 48.571 | 0.158 | 15.825 | 3.165 | 0.091 | 9.084  | 1.817 | 0.197  | 19.725  | 518.16 | --             | Open Sea | Intergenic |
| chr16 | 80,056,762 | 1.67E-02 | 7.92E-03 | 0.308 | 30.769 | 0.520 | 52.000 | 0.072 | 7.235  | 1.447 | 0.083 | 8.292  | 1.658 | 0.212  | 21.231  | 518.16 | --             | Open Sea | Intergenic |
| chr16 | 80,300,182 | 9.83E-02 | 9.83E-02 | 0.719 | 71.923 | 0.877 | 87.700 | 0.199 | 19.970 | 4.140 | 0.199 | 19.970 | 4.140 | 0.230  | 23.477  | 519.16 | --             | Open Sea | Intergenic |
| chr16 | 80,300,185 | 1.52E-02 | 9.83E-02 | 0.888 | 88.750 | 0.726 | 72.581 | 0.056 | 5.605  | 1.121 | 0.130 | 12.968 | 2.594 | -0.162 | -16.169 | 519.16 | --             | Open Sea | Intergenic |
| chr16 | 80,415,486 | 4.73E-02 | 2.71E-02 | 0.395 | 39.535 | 0.659 | 65.854 | 0.250 | 25.009 | 5.002 | 0.195 | 19.534 | 3.907 | 0.263  | 26.319  | 520.16 | --             | Open Sea | Intergenic |
| chr16 | 80,415,545 | 6.95E-03 | 2.71E-02 | 0.250 | 25.000 | 0.531 | 53.061 | 0.164 | 16.431 | 3.286 | 0.242 | 24.248 | 4.850 | 0.281  | 28.081  | 520.16 | --             | Open Sea | Intergenic |
| chr16 | 81,476,514 | 9.83E-03 | 9.83E-03 | 0.197 | 19.758 | 0.421 | 42.154 | 0.157 | 15.748 | 3.031 | 0.157 | 15.748 | 3.031 | 0.157  | 15.748  | 521.16 | CC             | Open Sea | Intergenic |
| chr16 | 81,476,522 | 4.08E-02 | 9.83E-03 | 0.532 | 53.226 | 0.704 | 70.423 | 0.238 | 23.817 | 4.763 | 0.148 | 14.848 | 2.970 | 0.171  | 17.197  | 521.16 | cc             | Open Sea | Intergenic |
| chr16 | 81,621,268 | 2.55E-02 | 8.43E-01 | 0.179 | 17.857 | 0.459 | 45.946 | 0.224 | 22.361 | 4.472 | 0.219 | 21.872 | 4.374 | 0.281  | 28.089  | 522.16 | --             | Open Sea | Intergenic |
| chr16 | 81,621,885 | 1.38E-02 | 1.38E-02 | 0.522 | 52.174 | 0.699 | 69.930 | 0.222 | 22.179 | 4.436 | 0.126 | 12.641 | 2.528 | 0.178  | 17.756  | 522.16 | --             | Open Sea | Intergenic |
| chr16 | 81,633,590 | 2.37E-02 | 2.34E-05 | 0.375 | 37.500 | 0.667 | 66.667 | 0.233 | 23.265 | 4.658 | 0.254 | 25.414 | 5.053 | 0.292  | 29.167  | 523.16 | --             | Open Sea | Intergenic |
| chr16 | 81,633,777 | 4.12E-02 | 2.34E-05 | 0.184 | 18.367 | 0.370 | 36.957 | 0.099 | 9.934  | 1.987 | 0.144 | 14.392 | 2.878 | 0.186  | 18.589  | 523.16 | ag             | Open Sea | Intergenic |
| chr16 | 82,709,896 | 4.37E-02 | 8.36E-05 | 0.589 | 58.879 | 0.724 | 72.781 | 0.197 | 19.675 | 3.935 | 0.138 | 13.816 | 2.763 | 0.135  | 13.502  | 524.16 | --             | Open Sea | Intergenic |
| chr16 | 82,710,067 | 4.70E-03 | 1.24E-03 | 0.431 | 43.137 | 0.750 | 75.000 | 0.231 | 23.063 | 4.613 | 0.166 | 16.614 | 3.323 | 0.319  | 31.863  | 524.16 | --             | Open Sea | Intergenic |
| chr16 | 82,710,083 | 1.27E-03 | 1.24E-03 | 0.463 | 46.341 | 0.734 | 73.884 | 0.253 | 25.389 | 4.813 | 0.253 | 25.389 | 4.813 | 0.273  | 27.343  | 524.16 | --             | Open Sea | Intergenic |
| chr16 | 83,383,052 | 3.50E-02 | 8.45E-02 | 0.625 | 62.500 | 0.318 | 31.818 | 0.315 | 31.470 | 6.294 | 0.309 | 30.907 | 6.181 | -0.307 | -30.682 | 525.16 | --             | Open Sea | Intergenic |
| chr16 | 83,383,688 | 4.57E-02 | 4.57E-02 | 0.823 | 82.258 | 0.662 | 66.154 | 0.094 | 9.405  | 1.881 | 0.213 | 21.284 | 4.257 | -0.161 | -16.104 | 525.16 | --             | Open Sea | Intergenic |
| chr16 | 83,586,314 | 4.41E-02 | 4.09E-03 | 0.306 | 30.556 | 0.463 | 46.296 | 0.320 | 31.985 | 6.397 | 0.233 | 23.260 | 4.652 | 0.157  | 15.741  | 526.16 | Check manually | Open Sea | Intergenic |
| chr16 | 83,586,324 | 4.09E-03 | 4.09E-03 | 0.304 | 30.454 | 0.555 | 55.555 | 0.322 | 32.014 | 6.162 | 0.322 | 32.014 | 6.162 | 0.322  | 32.014  | 526.16 | CG nearby      | Open Sea | Intergenic |
| chr16 | 83,574,111 | 1.55E-02 | 2.68E-01 | 0.875 | 87.500 | 0.545 | 54.545 | 0.101 | 10.062 | 2.012 | 0.392 | 39.186 | 7.837 | -0.330 | -32.955 | 527.16 | --             | Open Sea | Intergenic |
| chr16 | 83,574     |          |          |       |        |       |        |       |        |       |       |        |       |        |         |        |                |          |            |



|       |            |          |          |        |        |        |        |        |        |        |        |        |         |         |         |           |                |            |            |        |
|-------|------------|----------|----------|--------|--------|--------|--------|--------|--------|--------|--------|--------|---------|---------|---------|-----------|----------------|------------|------------|--------|
| chr17 | 35,867,129 | 3.02E-04 | 1.70E-03 | 0.705  | 70.492 | 0.352  | 35.227 | 0.110  | 14.000 | 2.800  | 0.199  | 19.914 | 3.983   | -0.353  | -35.265 | 544.17    | TC             | S Shore    | 5UTR       | Pp1r18 |
| chr17 | 35,867,129 | 3.02E-04 | 1.70E-03 | 0.705  | 70.492 | 0.352  | 35.227 | 0.140  | 14.000 | 2.800  | 0.199  | 19.914 | 3.983   | -0.353  | -35.265 | 544.17    | TC             | S Shore    | TSS 1500   | Pp1r18 |
| chr17 | 35,867,239 | 9.55E-02 | 9.48E-02 | 0.463  | 48.276 | 0.207  | 20.690 | 0.363  | 36.345 | 0.330  | 0.963  | 9.586  | 0.276   | -27.586 | 544.17  | CG nearby | S Shore        | Intergenic | Nm         |        |
| chr17 | 35,867,239 | 2.55E-02 | 9.05E-02 | 0.483  | 48.276 | 0.207  | 20.690 | 0.363  | 36.345 | 0.330  | 0.963  | 9.586  | 0.276   | -27.586 | 544.17  | CG nearby | S Shore        | Exon 1/3   | Pp1r18     |        |
| chr17 | 35,867,239 | 2.55E-02 | 9.05E-02 | 0.483  | 48.276 | 0.207  | 20.690 | 0.363  | 36.345 | 0.330  | 0.963  | 9.586  | 0.276   | -27.586 | 544.17  | CG nearby | S Shore        | TSS 1500   | Pp1r18     |        |
| chr17 | 35,946,595 | 4.81E-02 | 7.87E-02 | 0.385  | 38.462 | 0.600  | 60.000 | 0.195  | 19.494 | 3.899  | 0.140  | 14.379 | 2.876   | 0.215   | 21.538  | 545.17    | --             | Open Sea   | Intergenic |        |
| chr17 | 35,946,611 | 4.40E-02 | 7.63E-02 | 0.413  | 41.313 | 0.633  | 63.313 | 0.216  | 21.596 | 4.143  | 0.143  | 14.313 | 2.863   | 0.182   | 18.216  | 545.17    | --             | Open Sea   | Intergenic |        |
| chr17 | 37,629,438 | 2.18E-02 | 4.44E-01 | 0.282  | 28.205 | 0.611  | 61.111 | 0.207  | 20.707 | 4.141  | 0.245  | 24.514 | 4.903   | 0.329   | 32.906  | 546.17    | --             | Open Sea   | Intergenic |        |
| chr17 | 37,629,524 | 2.91E-02 | 2.17E-01 | 0.441  | 44.086 | 0.604  | 60.400 | 0.050  | 5.036  | 1.007  | 0.159  | 15.881 | 3.176   | 0.163   | 16.274  | 546.17    | --             | Open Sea   | Intergenic |        |
| chr17 | 39,643,772 | 3.97E-02 | 1.95E-03 | 0.706  | 70.588 | 0.857  | 85.714 | 0.138  | 13.768 | 2.754  | 0.116  | 11.594 | 2.319   | 0.151   | 15.126  | 547.17    | --             | Open Sea   | Intergenic |        |
| chr17 | 39,643,777 | 2.30E-02 | 1.58E-03 | 0.706  | 70.588 | 0.857  | 85.714 | 0.138  | 13.768 | 2.754  | 0.116  | 11.594 | 2.319   | 0.151   | 15.126  | 547.17    | --             | Open Sea   | Intergenic |        |
| chr17 | 39,827,692 | 2.30E-02 | 3.58E-01 | 0.257  | 25.514 | 0.550  | 55.000 | 0.178  | 17.132 | 3.426  | 0.196  | 19.636 | 3.927   | 0.293   | 29.286  | 548.17    | --             | Open Sea   | Intergenic |        |
| chr17 | 39,828,610 | 1.47E-02 | 7.70E-02 | 0.886  | 88.571 | 0.621  | 62.069 | 0.071  | 7.050  | 1.410  | 0.261  | 26.087 | 5.217   | -0.265  | -26.502 | 548.17    | --             | Open Sea   | Intergenic |        |
| chr17 | 40,886,107 | 3.58E-02 | 5.02E-02 | 0.536  | 53.571 | 0.788  | 78.788 | 0.123  | 12.272 | 2.454  | 0.126  | 12.540 | 2.508   | 0.252   | 25.216  | 549.17    | --             | Open Sea   | Intergenic |        |
| chr17 | 40,887,099 | 1.34E-02 | 9.60E-04 | 0.622  | 62.174 | 0.800  | 80.000 | 0.529  | 52.922 | 5.191  | 0.162  | 16.222 | 3.244   | 0.278   | 27.826  | 549.17    | AC             | Open Sea   | Intergenic |        |
| chr17 | 42,086,041 | 4.13E-02 | 4.13E-02 | 0.774  | 77.419 | 0.531  | 53.125 | 0.084  | 8.399  | 1.680  | 0.224  | 22.361 | 4.472   | -0.243  | -24.294 | 550.17    | --             | Open Sea   | Intergenic |        |
| chr17 | 42,086,245 | 1.37E-02 | 2.96E-02 | 0.296  | 29.630 | 0.652  | 65.217 | 0.224  | 22.361 | 4.472  | 0.301  | 30.085 | 6.017   | 0.356   | 35.588  | 550.17    | --             | Open Sea   | Intergenic |        |
| chr17 | 43,759,051 | 1.79E-02 | 1.98E-02 | 0.778  | 77.778 | 0.500  | 50.000 | 0.126  | 12.600 | 2.520  | 0.200  | 20.736 | 4.147   | -0.278  | -27.778 | 551.17    | --             | Open Sea   | Intergenic |        |
| chr17 | 43,759,098 | 1.90E-02 | 2.14E-03 | 0.769  | 76.923 | 0.520  | 52.000 | 0.222  | 22.181 | 4.436  | 0.203  | 20.308 | 4.062   | -0.249  | -24.923 | 551.17    | --             | Open Sea   | Intergenic |        |
| chr17 | 43,759,109 | 1.53E-02 | 2.14E-03 | 0.721  | 72.131 | 0.481  | 48.148 | 0.195  | 19.526 | 3.905  | 0.213  | 21.339 | 4.268   | -0.240  | -23.983 | 551.17    | --             | Open Sea   | Intergenic |        |
| chr17 | 44,309,899 | 2.37E-02 | 9.02E-02 | 0.870  | 86.957 | 0.594  | 59.375 | 0.110  | 10.963 | 2.193  | 0.310  | 31.002 | 6.200   | -0.276  | -27.582 | 552.17    | CG             | Open Sea   | Intergenic |        |
| chr17 | 44,310,439 | 3.12E-01 | 0.150    | 15.000 | 0.559  | 55.882 | 0.432  | 43.243 | 8.649  | 0.131  | 13.062 | 2.612  | 0.409   | 40.382  | 552.17  | CG nearby | Open Sea       | Intergenic |            |        |
| chr17 | 45,932,831 | 1.62E-02 | 3.15E-01 | 0.226  | 22.581 | 0.577  | 57.692 | 0.201  | 20.113 | 4.023  | 0.234  | 23.370 | 4.674   | 0.351   | 35.112  | 553.17    | Check manually | Open Sea   | Intergenic |        |
| chr17 | 45,932,983 | 2.93E-02 | 2.84E-01 | 0.647  | 64.706 | 0.802  | 80.220 | 0.129  | 12.852 | 2.570  | 0.221  | 22.139 | 4.428   | 0.155   | 15.514  | 553.17    | --             | Open Sea   | Intergenic |        |
| chr17 | 46,465,600 | 1.05E-02 | 2.17E-02 | 0.750  | 75.000 | 0.869  | 86.861 | 0.049  | 4.917  | 0.983  | 0.034  | 3.371  | 0.674   | 0.119   | 11.861  | 554.17    | --             | Open Sea   | Intergenic |        |
| chr17 | 46,465,610 | 4.07E-03 | 1.24E-02 | 0.826  | 82.590 | 0.813  | 81.250 | 0.146  | 11.896 | 0.146  | 0.146  | 14.594 | 0.187   | 0.187   | 18.660  | 554.17    | Check manually | Open Sea   | Intergenic |        |
| chr17 | 46,465,633 | 4.60E-03 | 1.24E-02 | 0.813  | 81.304 | 0.441  | 44.144 | 0.078  | 7.802  | 1.560  | 0.030  | 3.044  | 0.609   | 0.128   | 12.840  | 554.17    | Check manually | Open Sea   | Intergenic |        |
| chr17 | 47,731,400 | 8.82E-03 | 5.21E-01 | 0.462  | 46.154 | 0.162  | 16.216 | 0.266  | 26.612 | 5.322  | 0.105  | 10.542 | 2.108   | -0.299  | -29.938 | 555.17    | --             | Open Sea   | Intron 5/8 | Pgc    |
| chr17 | 47,731,466 | 2.68E-02 | 2.64E-01 | 0.675  | 67.532 | 0.443  | 44.262 | 0.093  | 9.282  | 1.856  | 0.218  | 21.832 | 4.366   | -0.233  | -23.270 | 555.17    | --             | Open Sea   | Intron 5/8 | Pgc    |
| chr17 | 47,732,297 | 3.45E-02 | 0.68E-02 | 0.675  | 67.532 | 0.443  | 44.262 | 0.093  | 9.282  | 1.856  | 0.218  | 21.832 | 4.366   | -0.233  | -23.270 | 555.17    | --             | Open Sea   | Intron 5/8 | Pgc    |
| chr17 | 51,430,282 | 4.56E-02 | 2.12E-02 | 0.675  | 67.500 | 0.867  | 86.667 | 0.112  | 11.205 | 2.241  | 0.162  | 16.213 | 3.243   | 0.193   | 19.167  | 556.17    | CG nearby      | Open Sea   | Intergenic |        |
| chr17 | 52,341,405 | 1.33E-05 | 5.85E-04 | 0.833  | 83.395 | 0.395  | 39.474 | 0.208  | 20.825 | 4.165  | 0.211  | 21.076 | 4.215   | 0.311   | 31.140  | 557.17    | CC             | Open Sea   | Intergenic |        |
| chr17 | 52,341,492 | 3.55E-02 | 2.60E-04 | 0.118  | 11.765 | 0.333  | 33.333 | 0.090  | 8.980  | 1.796  | 0.089  | 8.909  | 1.782   | 0.216   | 21.569  | 557.17    | TC             | Open Sea   | Intergenic |        |
| chr17 | 55,790,963 | 1.36E-02 | 1.36E-02 | 0.692  | 69.206 | 0.710  | 70.968 | 0.060  | 6.042  | 1.154  | 0.062  | 6.042  | 1.154   | 0.062   | 6.042   | 558.17    | --             | Open Sea   | Intergenic |        |
| chr17 | 55,790,975 | 3.74E-02 | 1.36E-02 | 0.627  | 62.687 | 0.794  | 79.365 | 0.307  | 30.696 | 6.139  | 0.409  | 4.916  | 0.983   | 0.167   | 16.679  | 558.17    | --             | Open Sea   | Intergenic |        |
| chr17 | 60,166,089 | 4.85E-02 | 4.86E-02 | 0.520  | 52.000 | 0.294  | 29.074 | 0.581  | 0.219  | 21.925 | 4.385  | -0.280 | -28.000 | -28.000 | -28.000 | 559.17    | --             | Open Sea   | Intergenic |        |
| chr17 | 60,166,102 | 4.11E-02 | 4.86E-02 | 0.467  | 46.667 | 0.214  | 21.429 | 0.275  | 27.479 | 5.496  | 0.147  | 14.710 | 2.942   | -0.252  | -25.238 | 559.17    | --             | Open Sea   | Intergenic |        |
| chr17 | 61,098,982 | 4.89E-02 | 5.53E-02 | 0.692  | 69.206 | 0.808  | 80.808 | 0.187  | 18.704 | 3.741  | 0.150  | 15.000 | 3.000   | 0.308   | 30.769  | 560.17    | CA             | Open Sea   | Intergenic |        |
| chr17 | 61,098,778 | 1.36E-02 | 5.98E-02 | 0.500  | 50.000 | 0.808  | 80.769 | 0.187  | 18.704 | 3.741  | 0.150  | 15.000 | 3.000   | 0.308   | 30.769  | 560.17    | CA             | Open Sea   | Intergenic |        |
| chr17 | 61,146,436 | 2.21E-02 | 2.11E-01 | 0.435  | 43.478 | 0.735  | 73.529 | 0.268  | 26.816 | 5.363  | 0.116  | 11.558 | 2.312   | 0.301   | 30.051  | 561.17    | --             | Open Sea   | Intergenic |        |
| chr17 | 61,146,486 | 3.12E-02 | 9.64E-02 | 0.586  | 58.621 | 0.829  | 82.857 | 0.210  | 20.993 | 4.199  | 0.125  | 12.525 | 2.505   | 0.242   | 24.236  | 561.17    | --             | Open Sea   | Intergenic |        |
| chr17 | 61,400,780 | 1.40E-02 | 1.73E-02 | 0.413  | 41.303 | 0.197  | 19.747 | 0.340  | 34.011 | 7.029  | 0.029  | 2.949  | 0.029   | 0.029   | 18.419  | 562.17    | --             | Open Sea   | Intergenic |        |
| chr17 | 61,401,368 | 2.39E-02 | 2.39E-02 | 0.400  | 40.000 | 0.744  | 74.359 | 0.283  | 28.269 | 5.654  | 0.143  | 14.308 | 2.862   | 0.344   | 34.359  | 562.17    | --             | Open Sea   | Intergenic |        |
| chr17 | 61,927,725 | 1.93E-02 | 4.18E-01 | 0.410  | 40.952 | 0.591  | 59.140 | 0.284  | 28.424 | 5.685  | 0.095  | 9.452  | 1.890   | 0.182   | 18.187  | 563.17    | --             | Open Sea   | Intergenic |        |
| chr17 | 61,928,113 | 4.59E-02 | 4.59E-02 | 0.667  | 66.667 | 0.417  | 41.667 | 0.139  | 13.912 | 2.782  | 0.234  | 23.356 | 4.671   | -0.250  | -25.000 | 563.17    | --             | Open Sea   | Intergenic |        |
| chr17 | 63,016,036 | 3.03E-02 | 3.03E-02 | 0.600  | 60.000 | 0.829  | 82.927 | 0.141  | 14.064 | 2.813  | 0.053  | 5.312  | 1.062   | -0.229  | -22.927 | 564.17    | CG nearby      | Open Sea   | Intergenic |        |
| chr17 | 63,016,132 | 2.09E-02 | 1.33E-01 | 0.600  | 60.000 | 0.829  | 82.927 | 0.141  | 14.064 | 2.813  | 0.053  | 5.312  | 1.062   | -0.229  | -22.927 | 564.17    | CG nearby      | Open Sea   | Intergenic |        |
| chr17 | 63,574,114 | 2.98E-02 | 5.09E-02 | 0.857  | 85.714 | 0.650  | 65.000 | 0.106  | 10.643 | 2.129  | 0.233  | 23.344 | 4.669   | -0.207  | -20.714 | 565.17    | Check manually | Open Sea   | Intergenic |        |
| chr17 | 63,574,165 | 1.54E-02 | 7.89E-02 | 0.403  | 40.323 | 0.619  | 61.905 | 0.303  | 30.143 | 6.029  | 0.055  | 5.524  | 1.105   | 0.216   | 21.582  | 565.17    | Check manually | Open Sea   | Intergenic |        |
| chr17 | 70,963,851 | 1.27E-03 | 1.32E-02 | 0.122  | 12.195 | 0.514  | 51.429 | 0.122  | 12.195 | 13.863 | 0.247  | 24.721 | 4.944   | 0.392   | 39.213  | 566.17    | --             | Open Sea   | Intergenic |        |
| chr17 | 70,963,856 | 7.98E-03 | 1.32E-02 | 0.158  | 15.789 | 0.528  | 52.778 | 0.172  | 17.168 | 3.434  | 0.235  | 23.455 | 4.691   | 0.370   | 36.988  | 566.17    | --             | Open Sea   | Intergenic |        |
| chr17 | 72,995,361 | 6.02E-03 | 6.39E-06 | 0.333  | 33.333 | 0.720  | 72.000 | 0.172  | 17.218 | 3.444  | 0.140  | 13.966 | 2.793   | 0.387   | 38.667  | 567.17    | TC             | Open Sea   | Intergenic |        |
| chr17 | 72,995,378 | 3.66E-03 | 6.39E-06 | 0.115  | 11.538 | 0.480  | 48.000 | 0.094  | 9.362  | 1.872  | 0.266  | 26.588 | 5.318   | 0.385   | 36.462  | 567.17    | CA             | Open Sea   | Intergenic |        |
| chr17 | 76,246,279 | 1.34E-02 | 1.14E-04 | 0.516  | 51.613 | 0.380  | 38.000 | 0.132  | 13.175 | 2.635  | 0.084  | 8.375  | 1.675   | 0.280   | 28.047  | 568.17    | --             | Open Sea   | Intergenic |        |
| chr17 | 76,246,374 | 1.34E-02 | 1.14E-04 | 0.516  | 51.613 | 0.806  | 80.556 | 0.132  | 13.175 | 2.635  | 0.128  | 12.775 | 2.555   | 0.289   | 28.943  | 568.17    | CG             | Open Sea   | Intergenic |        |
| chr17 | 76,246,391 | 1.66E-02 | 1.14E-04 | 0.400  | 40.000 | 0.694  | 69.444 | 0.128  | 12.773 | 3.551  | 0.127  | 12.713 | 2.543   | 0.294   | 29.444  | 568.17    | --             | Open Sea   | Intergenic |        |
| chr17 | 76,562,021 | 3.94E-02 | 1.88E-01 | 0.864  | 86.364 | 0.618  | 61.765 | 0.271  | 27.083 | 4.417  | 0.196  | 19.553 | 3.911   | -0.246  | -24.599 | 569.17    | --             | Open Sea   | Intergenic |        |
| chr17 | 76,562,290 | 1.95E-02 | 1.95E-02 | 0.692  | 69.206 | 0.883  | 88.290 | 0.140  | 13.965 | 2.794  | 0.156  | 15.794 | 3.000   | 0.300   | 30.000  | 569.17    | --             | Open Sea   | Intergenic |        |



|       |            |          |          |       |        |       |        |       |        |       |       |        |         |        |         |        |           |                |              |            |
|-------|------------|----------|----------|-------|--------|-------|--------|-------|--------|-------|-------|--------|---------|--------|---------|--------|-----------|----------------|--------------|------------|
| chr18 | 17,971,040 | 3.82E-02 | 1.21E-03 | 0.693 | 69.291 | 0.805 | 80.451 | 0.155 | 15.491 | 3.098 | 0.158 | 15.814 | 3.163   | 0.112  | 11.160  | 585.18 | --        | Open Sea       | Intergenic   |            |
| chr18 | 18,020,838 | 8.91E-03 | 1.85E-03 | 0.444 | 44.444 | 0.689 | 68.919 | 0.152 | 15.236 | 3.047 | 0.111 | 11.065 | 2.213   | 0.245  | 24.474  | 586.18 | CT        | Open Sea       | Intergenic   |            |
| chr18 | 18,020,658 | 1.85E-02 | 1.85E-03 | 0.444 | 44.444 | 0.689 | 68.919 | 0.152 | 15.236 | 3.047 | 0.111 | 11.065 | 2.213   | 0.245  | 24.474  | 586.18 | CT        | Open Sea       | Intergenic   |            |
| chr18 | 18,021,728 | 3.95E-02 | 3.48E-01 | 0.636 | 63.636 | 0.853 | 85.291 | 0.194 | 19.372 | 3.874 | 0.080 | 7.972  | 1.594   | 0.217  | 21.658  | 587.18 | CG nearby | Open Sea       | Intergenic   |            |
| chr18 | 18,123,582 | 3.70E-02 | 3.70E-02 | 0.813 | 81.250 | 0.671 | 67.059 | 0.371 | 37.076 | 7.415 | 0.184 | 16.357 | 3.271   | -0.142 | -14.191 | 587.18 | --        | Open Sea       | Intergenic   |            |
| chr18 | 19,070,988 | 2.07E-02 | 2.18E-02 | 0.848 | 84.848 | 0.596 | 59.574 | 0.103 | 10.276 | 2.055 | 0.263 | 26.275 | 5.255   | -0.253 | -25.274 | 588.18 | CA        | Open Sea       | Intergenic   |            |
| chr18 | 19,071,887 | 2.03E-02 | 2.23E-01 | 0.630 | 63.030 | 0.591 | 59.074 | 0.103 | 10.276 | 2.055 | 0.263 | 26.275 | 5.255   | -0.253 | -25.274 | 588.18 | CG nearby | Open Sea       | Intergenic   |            |
| chr18 | 19,354,047 | 3.14E-02 | 3.29E-01 | 0.636 | 63.636 | 0.826 | 82.609 | 0.151 | 15.137 | 3.027 | 0.136 | 13.592 | 2.718   | 0.190  | 18.972  | 589.18 | --        | Open Sea       | Intergenic   |            |
| chr18 | 19,354,109 | 1.55E-02 | 3.29E-01 | 0.534 | 53.448 | 0.760 | 76.000 | 0.080 | 8.037  | 1.607 | 0.093 | 9.327  | 1.865   | 0.226  | 22.552  | 589.18 | --        | Open Sea       | Intergenic   |            |
| chr18 | 23,340,554 | 9.12E-03 | 8.42E-03 | 0.650 | 65.000 | 0.379 | 37.931 | 0.097 | 9.675  | 1.935 | 0.184 | 16.400 | 3.280   | -0.271 | -27.069 | 590.18 | ag        | Open Sea       | Intergenic   |            |
| chr18 | 23,340,597 | 8.64E-02 | 8.42E-03 | 0.650 | 65.000 | 0.379 | 37.931 | 0.097 | 9.675  | 1.935 | 0.184 | 16.400 | 3.280   | -0.271 | -27.069 | 590.18 | ag        | Open Sea       | Intergenic   |            |
| chr18 | 24,122,400 | 6.67E-03 | 2.50E-01 | 0.783 | 78.261 | 0.350 | 35.000 | 0.274 | 27.408 | 5.482 | 0.205 | 20.523 | 4.105   | -0.433 | -43.261 | 591.18 | CT        | S Shore        | TSS 1500     |            |
| chr18 | 24,122,462 | 3.90E-02 | 2.50E-01 | 0.242 | 24.242 | 0.486 | 48.571 | 0.156 | 15.587 | 3.117 | 0.207 | 20.673 | 4.135   | 0.243  | 24.329  | 591.18 | ca        | S Shore        | TSS 1500     |            |
| chr18 | 27,780,434 | 3.92E-02 | 8.80E-02 | 0.520 | 52.000 | 0.818 | 81.818 | 0.326 | 32.558 | 6.512 | 0.149 | 14.879 | 2.976   | 0.298  | 29.818  | 592.18 | CA        | Open Sea       | Intergenic   |            |
| chr18 | 27,780,453 | 3.37E-02 | 3.35E-01 | 0.636 | 63.636 | 0.826 | 82.609 | 0.151 | 15.137 | 3.027 | 0.136 | 13.592 | 2.718   | 0.190  | 18.972  | 592.18 | CA        | Open Sea       | Intergenic   |            |
| chr18 | 28,241,849 | 1.20E-02 | 1.48E-01 | 0.655 | 65.517 | 0.851 | 85.075 | 0.135 | 13.455 | 2.691 | 0.080 | 8.012  | 1.602   | 0.196  | 19.557  | 593.18 | --        | Open Sea       | Intergenic   |            |
| chr18 | 28,242,809 | 4.29E-02 | 5.39E-02 | 0.762 | 76.190 | 0.520 | 52.000 | 0.170 | 16.994 | 3.399 | 0.270 | 26.985 | 5.397   | -0.242 | -24.190 | 593.18 | --        | Open Sea       | Intergenic   |            |
| chr18 | 28,346,405 | 8.59E-03 | 8.59E-03 | 0.512 | 51.163 | 0.783 | 78.261 | 0.294 | 29.417 | 5.883 | 0.081 | 8.052  | 1.610   | 0.271  | 27.098  | 594.18 | --        | Check manually | Open Sea     | Intergenic |
| chr18 | 28,346,660 | 4.87E-02 | 4.87E-02 | 0.563 | 56.250 | 0.825 | 82.465 | 0.113 | 11.333 | 1.51  | 0.267 | 0.151  | 3.013   | 0.262  | 26.206  | 594.18 | --        | Open Sea       | Intergenic   |            |
| chr18 | 28,553,882 | 3.34E-03 | 7.61E-02 | 0.778 | 77.778 | 0.400 | 40.000 | 0.169 | 16.913 | 3.383 | 0.212 | 21.224 | 4.245   | -0.378 | -37.778 | 595.18 | --        | Open Sea       | Intergenic   |            |
| chr18 | 28,553,929 | 3.78E-02 | 7.61E-02 | 0.872 | 87.179 | 0.688 | 68.750 | 0.074 | 7.364  | 1.473 | 0.156 | 15.573 | 3.115   | -0.194 | -18.429 | 595.18 | --        | Open Sea       | Intergenic   |            |
| chr18 | 29,423,872 | 3.11E-02 | 3.72E-03 | 0.240 | 24.000 | 0.514 | 51.429 | 0.377 | 37.712 | 7.542 | 0.174 | 17.392 | 3.478   | 0.274  | 27.429  | 596.18 | CA        | Open Sea       | Intergenic   |            |
| chr18 | 29,423,046 | 2.63E-02 | 3.72E-03 | 0.313 | 31.250 | 0.625 | 62.500 | 0.237 | 23.699 | 4.740 | 0.383 | 38.266 | 7.653   | 0.313  | 31.250  | 596.18 | TG        | Open Sea       | Intergenic   |            |
| chr18 | 31,303,790 | 3.02E-02 | 3.48E-02 | 0.464 | 46.429 | 0.783 | 78.261 | 0.278 | 27.760 | 5.552 | 0.206 | 20.554 | 4.111   | 0.318  | 31.832  | 597.18 | TG        | Open Sea       | Intron 1/4   |            |
| chr18 | 31,303,829 | 2.15E-02 | 3.48E-02 | 0.121 | 12.121 | 0.394 | 39.394 | 0.214 | 21.396 | 4.279 | 0.211 | 21.115 | 4.223   | 0.273  | 27.273  | 597.18 | --        | Check manually | Open Sea     | Intron 1/4 |
| chr18 | 33,051,304 | 2.71E-02 | 1.26E-01 | 0.804 | 80.435 | 0.596 | 59.574 | 0.083 | 8.316  | 1.663 | 0.210 | 21.033 | 4.207   | -0.209 | -20.860 | 598.18 | --        | Open Sea       | Intergenic   |            |
| chr18 | 33,051,310 | 1.60E-02 | 1.26E-01 | 0.804 | 80.435 | 0.596 | 59.574 | 0.083 | 8.316  | 1.663 | 0.210 | 21.033 | 4.207   | -0.209 | -20.860 | 598.18 | --        | Open Sea       | Intergenic   |            |
| chr18 | 33,383,458 | 3.73E-03 | 9.85E-02 | 0.607 | 60.714 | 0.842 | 84.211 | 0.125 | 12.550 | 2.510 | 0.128 | 12.792 | 2.558   | 0.239  | 23.496  | 599.18 | --        | N Shore        | Intergenic   |            |
| chr18 | 33,383,687 | 4.97E-02 | 9.51E-02 | 0.545 | 54.545 | 0.808 | 80.769 | 0.139 | 13.944 | 2.789 | 0.208 | 20.572 | 4.114   | 0.262  | 26.224  | 599.18 | CA        | N Shore        | Intergenic   |            |
| chr18 | 34,325,710 | 4.09E-02 | 6.33E-02 | 0.833 | 83.333 | 0.500 | 50.000 | 0.253 | 25.251 | 3.953 | 0.075 | 7.542  | 3.521   | 0.243  | 24.329  | 600.18 | --        | Open Sea       | Intergenic   |            |
| chr18 | 34,326,398 | 4.97E-02 | 4.78E-01 | 0.748 | 74.809 | 0.641 | 64.103 | 0.083 | 8.259  | 1.652 | 0.249 | 4.877  | 0.975   | -0.107 | -10.707 | 600.18 | --        | Open Sea       | Intergenic   |            |
| chr18 | 34,958,854 | 3.20E-02 | 3.05E-02 | 0.617 | 61.667 | 0.447 | 47.388 | 0.178 | 17.763 | 3.553 | 0.149 | 14.944 | 2.989   | -0.143 | -14.298 | 601.18 | --        | S Shelf        | Intergenic   |            |
| chr18 | 34,958,857 | 4.18E-03 | 3.05E-02 | 0.459 | 45.902 | 0.220 | 22.024 | 0.272 | 27.172 | 5.434 | 0.086 | 8.556  | 1.711   | -0.239 | -23.868 | 601.18 | --        | S Shelf        | Intergenic   |            |
| chr18 | 39,017,619 | 4.23E-02 | 4.23E-02 | 0.826 | 82.609 | 0.567 | 56.667 | 0.417 | 41.660 | 8.332 | 0.283 | 28.256 | 5.651   | -0.259 | -25.942 | 602.18 | --        | Open Sea       | Intron 1/22  |            |
| chr18 | 39,017,619 | 4.23E-02 | 4.23E-02 | 0.826 | 82.609 | 0.567 | 56.667 | 0.417 | 41.660 | 8.332 | 0.283 | 28.256 | 5.651   | -0.259 | -25.942 | 602.18 | --        | Open Sea       | Intron 1/22  |            |
| chr18 | 39,017,840 | 3.59E-02 | 9.36E-02 | 0.406 | 40.625 | 0.148 | 14.815 | 0.250 | 24.971 | 4.994 | 0.156 | 15.590 | 3.118   | -0.258 | -25.810 | 602.18 | AC        | Open Sea       | Intron 1/22  |            |
| chr18 | 39,017,840 | 3.59E-02 | 9.36E-02 | 0.406 | 40.625 | 0.148 | 14.815 | 0.250 | 24.971 | 4.994 | 0.156 | 15.590 | 3.118   | -0.258 | -25.810 | 602.18 | AC        | Open Sea       | Intron 1/22  |            |
| chr18 | 39,301,825 | 6.72E-02 | 6.72E-02 | 0.250 | 25.000 | 0.750 | 75.000 | 0.425 | 42.492 | 8.498 | 0.231 | 23.070 | 4.614   | 0.500  | 50.000  | 603.18 | GA        | Open Sea       | Intron 1/22  |            |
| chr18 | 39,301,825 | 6.72E-02 | 6.72E-02 | 0.250 | 25.000 | 0.750 | 75.000 | 0.425 | 42.492 | 8.498 | 0.231 | 23.070 | 4.614   | 0.500  | 50.000  | 603.18 | GA        | Open Sea       | Intron 1/22  |            |
| chr18 | 39,301,828 | 1.48E-02 | 6.72E-05 | 0.250 | 25.000 | 0.750 | 75.000 | 0.425 | 42.492 | 8.498 | 0.231 | 23.070 | 4.614   | 0.500  | 50.000  | 603.18 | GA        | Open Sea       | Intron 1/22  |            |
| chr18 | 39,301,828 | 3.29E-02 | 6.72E-05 | 0.261 | 26.087 | 0.696 | 69.565 | 0.393 | 39.314 | 7.863 | 0.339 | 33.903 | 6.781   | 0.435  | 43.478  | 603.18 | CC        | Open Sea       | Intron 19/22 |            |
| chr18 | 39,301,828 | 3.29E-02 | 6.72E-05 | 0.261 | 26.087 | 0.696 | 69.565 | 0.393 | 39.314 | 7.863 | 0.339 | 33.903 | 6.781   | 0.435  | 43.478  | 603.18 | CC        | Open Sea       | Intron 19/22 |            |
| chr18 | 39,301,828 | 3.29E-02 | 6.72E-05 | 0.261 | 26.087 | 0.696 | 69.565 | 0.393 | 39.314 | 7.863 | 0.339 | 33.903 | 6.781   | 0.435  | 43.478  | 603.18 | CC        | Open Sea       | Intron 19/22 |            |
| chr18 | 39,663,113 | 2.55E-02 | 2.55E-02 | 0.593 | 59.259 | 0.857 | 85.714 | 0.221 | 22.054 | 4.411 | 0.140 | 13.963 | 2.793   | 0.265  | 26.455  | 604.18 | CT        | Open Sea       | Intergenic   |            |
| chr18 | 39,663,389 | 4.62E-02 | 1.11E-01 | 0.746 | 74.648 | 0.592 | 59.211 | 0.120 | 12.009 | 2.402 | 0.157 | 15.725 | 3.145   | -0.154 | -15.437 | 604.18 | AC        | Open Sea       | Intergenic   |            |
| chr18 | 44,542,979 | 7.18E-02 | 7.18E-02 | 0.811 | 81.143 | 0.250 | 25.000 | 0.115 | 11.469 | 2.294 | 0.408 | 40.825 | 4.055   | -0.571 | -57.143 | 605.18 | CA        | Open Sea       | Intergenic   |            |
| chr18 | 44,542,999 | 3.08E-02 | 1.01E-04 | 0.815 | 81.548 | 0.500 | 50.000 | 0.153 | 15.348 | 3.070 | 0.342 | 34.189 | 6.838   | -0.315 | -31.481 | 605.18 | CC        | Open Sea       | Intron 3/18  |            |
| chr18 | 44,543,001 | 2.35E-02 | 1.01E-04 | 0.778 | 77.778 | 0.450 | 45.000 | 0.163 | 16.278 | 3.256 | 0.311 | 31.127 | 6.225   | -0.328 | -32.778 | 605.18 | C-        | Open Sea       | Intron 3/18  |            |
| chr18 | 46,974,490 | 3.79E-02 | 3.63E-01 | 0.534 | 53.409 | 0.686 | 68.627 | 0.106 | 10.596 | 2.119 | 0.071 | 7.135  | 1.427   | 0.152  | 15.218  | 606.18 | --        | Open Sea       | Intergenic   |            |
| chr18 | 46,974,827 | 2.49E-02 | 1.95E-02 | 0.200 | 20.000 | 0.340 | 34.046 | 0.200 | 20.000 | 1.579 | 0.045 | 4.525  | 0.905   | 0.149  | 14.940  | 606.18 | --        | Open Sea       | Intergenic   |            |
| chr18 | 50,733,328 | 2.09E-02 | 3.18E-04 | 0.850 | 85.000 | 0.703 | 70.330 | 0.088 | 8.828  | 1.766 | 0.152 | 15.214 | 3.043   | -0.147 | -14.670 | 607.18 | --        | Open Sea       | Intergenic   |            |
| chr18 | 50,733,450 | 4.06E-02 | 3.90E-03 | 0.670 | 66.990 | 0.798 | 79.817 | 0.179 | 17.886 | 3.577 | 0.036 | 3.619  | 0.724   | 0.128  | 12.826  | 607.18 | --        | Open Sea       | Intergenic   |            |
| chr18 | 51,207,193 | 1.10E-02 | 6.53E-02 | 0.309 | 30.882 | 0.551 | 55.102 | 0.146 | 14.789 | 2.956 | 0.184 | 18.414 | 3.683   | 0.242  | 24.220  | 608.18 | --        | Check manually | Open Sea     | Intergenic |
| chr18 | 51,207,229 | 6.53E-02 | 6.53E-02 | 0.309 | 30.882 | 0.551 | 55.102 | 0.146 | 14.789 | 2.956 | 0.184 | 18.414 | 3.683   | 0.242  | 24.220  | 608.18 | --        | Check manually | Open Sea     | Intergenic |
| chr18 | 51,455,785 | 1.85E-02 | 1.16E-04 | 0.324 | 32.432 | 0.650 | 65.000 | 0.220 | 21.970 | 4.394 | 0.195 | 19.526 | 3.905   | 0.326  | 32.568  | 609.18 | ct        | Open Sea       | Intergenic   |            |
| chr18 | 51,455,889 | 8.18E-04 | 1.16E-04 | 0.167 | 16.667 | 0.500 | 50.000 | 0.122 | 12.165 | 2.433 | 0.126 | 12.580 | 2.516   | 0.333  | 33.333  | 609.18 | tg        | Open Sea       | Intergenic   |            |
| chr18 | 51,637,211 | 4.21E-02 | 2.95E-03 | 0.313 | 31.250 | 0.545 | 54.545 | 0.247 | 24.656 | 4.931 | 0.217 | 21.655 | 4.331   | 0.233  | 23.295  | 610.18 | -G        | Open Sea       | Intergenic   |            |
| chr18 | 52,072,221 | 2.64E-02 | 2.95E-03 | 0.313 | 31.250 | 0.545 | 54.545 | 0.247 | 24.656 | 4.931 | 0.217 | 21.655 | 4.331   | 0.233  | 23.295  | 610.18 | -G        | Open Sea       | Intergenic   |            |
| chr18 | 52,072,599 | 1.20E-02 | 3.62E-04 | 0.500 | 50.000 | 0.733 | 73.333 | 0.269 | 26.856 | 5.371 | 0.335 | 33.471 | 6.694</ |        |         |        |           |                |              |            |



|       |            |          |          |       |        |        |        |        |        |        |        |        |       |        |         |        |                |            |            |            |
|-------|------------|----------|----------|-------|--------|--------|--------|--------|--------|--------|--------|--------|-------|--------|---------|--------|----------------|------------|------------|------------|
| chr1  | 11,614,126 | 5.70E-03 | 9.52E-06 | 0.147 | 14,706 | 0.481  | 48,148 | 0.124  | 12,418 | 2.484  | 0.082  | 8,201  | 1.640 | 0.334  | 33,442  | 628.19 | --             | Open Sea   | Intergenic |            |
| chr1  | 11,614,132 | 1.46E-02 | 9.52E-06 | 0.129 | 12,903 | 0.444  | 44,444 | 0.164  | 16,432 | 3.286  | 0.312  | 31,247 | 6,249 | 0.315  | 31,541  | 628.19 | --             | Open Sea   | Intergenic |            |
| chr19 | 13,183,182 | 1.57E-02 | 1.59E-01 | 0.444 | 44,444 | 76,923 | 0.318  | 31,774 | 6.355  | 0.248  | 24,793 | 4,959  | 0.325 | 32,479 | 629.19  | --     | Open Sea       | Intergenic |            |            |
| chr19 | 13,183,533 | 1.57E-02 | 1.57E-02 | 0.444 | 44,444 | 76,923 | 0.318  | 31,774 | 6.355  | 0.248  | 24,793 | 4,959  | 0.325 | 32,479 | 629.19  | --     | Open Sea       | Intergenic |            |            |
| chr19 | 16,792,989 | 2.65E-02 | 6.65E-02 | 0.110 | 10,989 | 0.269  | 22,609 | 0.071  | 7,139  | 1.139  | 0.091  | 9,110  | 1,021 | 0.116  | 11,520  | 630.19 | CA             | Open Sea   | Intergenic |            |
| chr19 | 16,793,417 | 1.48E-02 | 1.59E-01 | 0.745 | 74,528 | 0.576  | 57,600 | 0.102  | 10,201 | 2.040  | 0.087  | 8,701  | 1,740 | -0.169 | -16,928 | 630.19 | --             | Open Sea   | Intergenic |            |
| chr19 | 17,407,956 | 2.58E-02 | 2.20E-02 | 0.500 | 50,000 | 0.792  | 79,167 | 0.330  | 33,008 | 6.602  | 0.197  | 19,674 | 3,935 | 0.292  | 29,167  | 631.19 | --             | Open Sea   | Intergenic |            |
| chr19 | 17,407,960 | 4.68E-02 | 2.20E-02 | 0.429 | 42,857 | 0.768  | 76,596 | 0.361  | 36,090 | 7.218  | 0.179  | 17,903 | 3,581 | 0.337  | 33,739  | 631.19 | --             | Open Sea   | Intergenic |            |
| chr19 | 17,875,702 | 9.31E-02 | 9.31E-02 | 0.500 | 50,000 | 0.792  | 79,167 | 0.330  | 33,008 | 6.602  | 0.197  | 19,674 | 3,935 | 0.292  | 29,167  | 631.19 | Check manually | Open Sea   | Intergenic |            |
| chr19 | 17,875,736 | 6.88E-03 | 1.02E-01 | 0.143 | 14,286 | 0.533  | 53,333 | 0.125  | 12,516 | 1.216  | 0.079  | 20,917 | 4,183 | 0.390  | 39,048  | 632.19 | gt             | Open Sea   | Intergenic |            |
| chr19 | 19,702,961 | 9.65E-03 | 9.65E-03 | 0.605 | 60,526 | 0.842  | 84,211 | 0.210  | 21,011 | 4.202  | 0.103  | 10,289 | 2,058 | 0.237  | 23,684  | 633.19 | Check manually | Open Sea   | Intergenic |            |
| chr19 | 19,703,911 | 1.14E-01 | 0.75E-02 | 0.440 | 44,000 | 0.750  | 75,000 | 0.140  | 14,000 | 21.781 | 0.217  | 21,731 | 4,346 | 0.310  | 31,000  | 633.19 | CA             | Open Sea   | Intergenic |            |
| chr19 | 19,723,577 | 2.77E-02 | 6.08E-01 | 0.500 | 50,000 | 0.750  | 75,000 | 0.140  | 14,000 | 21.781 | 0.217  | 21,731 | 4,346 | 0.310  | 31,000  | 633.19 | CA             | Open Sea   | Intergenic |            |
| chr19 | 19,723,791 | 0.30E-02 | 2.39E-01 | 0.333 | 33,333 | 0.660  | 60,000 | 0.229  | 22,921 | 4.684  | 0.164  | 16,434 | 3,287 | 0.267  | 26,667  | 634.19 | ca             | Open Sea   | Intergenic |            |
| chr19 | 20,008,907 | 1.65E-02 | 1.81E-01 | 0.381 | 38,095 | 0.759  | 75,862 | 0.322  | 32,160 | 6.432  | 0.225  | 22,511 | 4,502 | 0.378  | 37,767  | 635.19 | AC             | Open Sea   | Intergenic |            |
| chr19 | 20,009,281 | 1.73E-02 | 1.73E-02 | 0.500 | 50,000 | 0.750  | 75,000 | 0.140  | 14,000 | 21.781 | 0.217  | 21,731 | 4,346 | 0.310  | 31,000  | 635.19 | TG             | Open Sea   | Intergenic |            |
| chr19 | 24,474,455 | 1.12E-02 | 2.07E-03 | 0.396 | 39,583 | 0.667  | 66,667 | 0.220  | 22,039 | 4.408  | 0.172  | 17,180 | 3,436 | 0.271  | 27,083  | 636.19 | tg             | N Shelf    | Open Sea   | Intergenic |
| chr19 | 24,474,534 | 3.71E-02 | 2.07E-03 | 0.267 | 26,667 | 0.615  | 61,538 | 0.208  | 20,763 | 4.153  | 0.377  | 37,667 | 7,533 | 0.349  | 34,872  | 636.19 | ca             | N Shelf    | TSS 2000   | Pip5k1b    |
| chr19 | 24,474,534 | 3.71E-02 | 2.07E-03 | 0.267 | 26,667 | 0.615  | 61,538 | 0.208  | 20,763 | 4.153  | 0.377  | 37,667 | 7,533 | 0.349  | 34,872  | 636.19 | ca             | N Shelf    | Open Sea   | Intergenic |
| chr19 | 30,716,348 | 1.94E-02 | 2.32E-02 | 0.906 | 90,586 | 0.722  | 72,222 | 0.189  | 18,906 | 4.153  | 0.377  | 37,667 | 7,533 | 0.349  | 34,872  | 636.19 | ca             | N Shelf    | Open Sea   | Intergenic |
| chr19 | 30,716,348 | 1.94E-02 | 2.32E-02 | 0.906 | 90,586 | 0.722  | 72,222 | 0.189  | 18,906 | 4.153  | 0.377  | 37,667 | 7,533 | 0.349  | 34,872  | 636.19 | ca             | N Shelf    | Open Sea   | Intergenic |
| chr19 | 30,812,532 | 4.49E-02 | 1.96E-01 | 0.875 | 87,500 | 0.884  | 88,888 | 0.190  | 19,000 | 1.980  | 0.066  | 6,642  | 1,328 | 0.101  | 10,145  | 637.19 | CC             | Open Sea   | Intergenic |            |
| chr19 | 30,812,888 | 4.57E-02 | 2.08E-01 | 0.608 | 60,784 | 0.824  | 82,353 | 0.188  | 18,836 | 3.117  | 0.182  | 18,831 | 3,766 | 0.216  | 21,569  | 638.19 | Check manually | Open Sea   | Intergenic |            |
| chr19 | 30,812,888 | 4.57E-02 | 2.08E-01 | 0.608 | 60,784 | 0.824  | 82,353 | 0.188  | 18,836 | 3.117  | 0.182  | 18,831 | 3,766 | 0.216  | 21,569  | 638.19 | Check manually | Open Sea   | Intergenic |            |
| chr19 | 31,159,326 | 2.52E-02 | 2.52E-02 | 0.218 | 21,818 | 0.444  | 44,444 | 0.115  | 11,502 | 2.300  | 0.239  | 23,793 | 4,759 | 0.226  | 22,626  | 639.19 | CO nearby      | Open Sea   | Intergenic |            |
| chr19 | 32,337,601 | 2.28E-02 | 2.67E-03 | 0.705 | 70,455 | 0.475  | 47,458 | 0.220  | 22,048 | 4.410  | 0.118  | 11,932 | 2,386 | -0.230 | -26,997 | 640.19 | --             | Open Sea   | Intron 2/9 | Sgms1      |
| chr19 | 32,337,616 | 4.84E-02 | 2.67E-03 | 0.744 | 74,419 | 0.554  | 55,357 | 0.156  | 15,607 | 3.121  | 0.121  | 12,104 | 2,421 | -0.191 | -19,061 | 640.19 | --             | Open Sea   | Intron 2/9 | Sgms1      |
| chr19 | 34,299,069 | 4.22E-02 | 2.02E-02 | 0.500 | 50,000 | 0.750  | 75,000 | 0.140  | 14,000 | 21.781 | 0.217  | 21,731 | 4,346 | 0.310  | 31,000  | 641.19 | --             | Open Sea   | Intron 2/9 | Fas        |
| chr19 | 34,299,291 | 2.77E-02 | 1.65E-01 | 0.667 | 66,667 | 0.484  | 48,898 | 0.218  | 21,808 | 4.362  | 0.166  | 16,558 | 3,312 | 0.166  | 21,769  | 641.19 | CA             | Open Sea   | Intron 1/8 | Fas        |
| chr19 | 39,162,372 | 4.22E-02 | 4.80E-02 | 0.593 | 59,259 | 0.321  | 32,143 | 0.199  | 19,932 | 3.896  | 0.213  | 21,322 | 4,264 | -0.271 | -27,116 | 642.19 | --             | Open Sea   | Intergenic |            |
| chr19 | 39,162,497 | 3.73E-02 | 2.46E-02 | 0.711 | 71,111 | 0.883  | 88,333 | 0.094  | 9,394  | 1.879  | 0.103  | 10,317 | 2,063 | 0.172  | 17,222  | 642.19 | --             | Open Sea   | Intergenic |            |
| chr19 | 40,525,981 | 5.59E-02 | 4.80E-01 | 0.591 | 59,259 | 0.321  | 32,143 | 0.199  | 19,932 | 3.896  | 0.213  | 21,322 | 4,264 | -0.271 | -27,116 | 642.19 | ca             | Open Sea   | Intergenic |            |
| chr19 | 40,526,026 | 2.35E-02 | 4.43E-02 | 0.690 | 69,866 | 0.357  | 35,714 | 0.171  | 17,135 | 3.427  | 0.289  | 28,860 | 5,772 | -0.333 | -33,251 | 643.19 | CO nearby      | Open Sea   | Intergenic |            |
| chr19 | 41,392,657 | 1.32E-02 | 3.67E-03 | 0.372 | 37,209 | 0.531  | 53,077 | 0.119  | 11,932 | 2.386  | 0.118  | 11,803 | 2,386 | 0.159  | 15,868  | 644.19 | --             | Open Sea   | Intergenic |            |
| chr19 | 41,392,851 | 4.99E-02 | 2.89E-04 | 0.435 | 43,519 | 0.603  | 60,577 | 0.087  | 8,738  | 1.448  | 0.095  | 9,543  | 1,909 | 0.171  | 17,058  | 644.19 | --             | Open Sea   | Intergenic |            |
| chr19 | 41,392,954 | 3.40E-03 | 3.40E-03 | 0.605 | 60,526 | 0.769  | 76,923 | 0.318  | 31,774 | 6.355  | 0.248  | 24,793 | 4,959 | 0.325  | 32,479  | 644.19 | Check manually | Open Sea   | Intergenic |            |
| chr19 | 43,576,320 | 4.00E-02 | 3.78E-02 | 0.567 | 56,731 | 0.706  | 70,720 | 0.078  | 7,553  | 1.553  | 0.101  | 10,074 | 2,015 | 0.135  | 13,540  | 645.19 | --             | Open Sea   | Intergenic |            |
| chr19 | 43,576,509 | 1.58E-02 | 4.26E-01 | 0.426 | 42,647 | 0.667  | 66,667 | 0.141  | 14,129 | 2.826  | 0.340  | 33,960 | 6,792 | 0.240  | 24,020  | 645.19 | --             | Open Sea   | Intergenic |            |
| chr19 | 49,704,521 | 1.40E-02 | 5.85E-02 | 0.734 | 73,438 | 0.518  | 51,786 | 0.140  | 14,008 | 2.801  | 0.107  | 10,748 | 2,149 | -0.217 | -21,652 | 646.19 | --             | Open Sea   | Intergenic |            |
| chr19 | 49,704,625 | 5.85E-02 | 5.85E-02 | 0.500 | 50,000 | 0.750  | 75,000 | 0.140  | 14,000 | 21.781 | 0.217  | 21,731 | 4,346 | 0.310  | 31,000  | 646.19 | --             | Open Sea   | Intergenic |            |
| chr19 | 49,811,945 | 6.88E-03 | 1.79E-03 | 0.682 | 68,888 | 0.631  | 63,128 | 0.093  | 9,278  | 1.477  | 0.056  | 5,561  | 1,122 | 0.149  | 14,881  | 646.19 | --             | Open Sea   | Intergenic |            |
| chr19 | 49,812,036 | 4.59E-02 | 1.79E-03 | 0.509 | 50,909 | 0.392  | 39,241 | 0.117  | 11,697 | 2.339  | 0.081  | 8,142  | 1,618 | -0.117 | -11,689 | 647.19 | --             | Open Sea   | Intergenic |            |
| chr19 | 51,593,935 | 3.66E-02 | 5.61E-01 | 0.720 | 72,043 | 0.849  | 84,884 | 0.139  | 13,901 | 2.780  | 0.081  | 8,123  | 1,625 | 0.128  | 12,841  | 648.19 | --             | Open Sea   | Intergenic |            |
| chr19 | 51,594,243 | 4.30E-02 | 5.61E-01 | 0.720 | 72,043 | 0.849  | 84,884 | 0.139  | 13,901 | 2.780  | 0.081  | 8,123  | 1,625 | 0.128  | 12,841  | 648.19 | --             | Open Sea   | Intergenic |            |
| chr19 | 53,751,221 | 1.48E-02 | 1.76E-01 | 0.794 | 79,426 | 0.881  | 88,075 | 0.031  | 3,145  | 0.269  | 0.089  | 8,885  | 1,777 | -0.114 | -11,351 | 649.19 | --             | Open Sea   | Intergenic |            |
| chr19 | 53,751,441 | 2.67E-02 | 1.62E-02 | 0.500 | 50,000 | 0.750  | 75,000 | 0.140  | 14,000 | 21.781 | 0.217  | 21,731 | 4,346 | 0.310  | 31,000  | 649.19 | --             | Open Sea   | Intergenic |            |
| chr19 | 56,336,632 | 7.68E-03 | 1.90E-03 | 0.319 | 31,915 | 0.623  | 64,286 | 0.337  | 33,703 | 6.421  | 0.126  | 20,460 | 4,082 | -0.324 | -32,371 | 650.19 | Check manually | Open Sea   | Intergenic |            |
| chr19 | 56,336,632 | 7.68E-03 | 1.90E-03 | 0.319 | 31,915 | 0.623  | 64,286 | 0.337  | 33,703 | 6.421  | 0.126  | 20,460 | 4,082 | -0.324 | -32,371 | 650.19 | Check manually | Open Sea   | Intergenic |            |
| chr19 | 59,362,561 | 3.42E-03 | 1.35E-03 | 0.159 | 15,909 | 0.464  | 46,429 | 0.149  | 14,888 | 2.978  | 0.117  | 11,699 | 2,340 | 0.305  | 30,519  | 651.19 | TG             | Open Sea   | Intergenic |            |
| chr19 | 59,362,569 | 3.30E-03 | 1.35E-03 | 0.178 | 17,778 | 0.466  | 46,552 | 0.120  | 12,036 | 2.407  | 0.118  | 11,823 | 2,386 | 0.288  | 28,774  | 651.19 | TA             | Open Sea   | Intergenic |            |
| chr19 | 59,362,609 | 3.08E-03 | 1.35E-03 | 0.279 | 27,869 | 0.535  | 53,521 | 0.146  | 14,611 | 2.922  | 0.103  | 10,313 | 2,063 | 0.257  | 20,565  | 651.19 | --             | Open Sea   | Intergenic |            |
| chr2  | 3,657,009  | 6.87E-02 | 6.87E-02 | 0.841 | 84,111 | 0.513  | 51,347 | 0.289  | 28,896 | 5.772  | 0.289  | 28,896 | 5,772 | -0.333 | -33,251 | 652.19 | --             | Open Sea   | Intergenic |            |
| chr2  | 3,657,043  | 3.31E-02 | 6.87E-02 | 0.872 | 86,207 | 0.591  | 59,091 | 0.121  | 12,079 | 2.916  | 0.361  | 36,150 | 7,203 | -0.271 | -27,116 | 652.19 | --             | Open Sea   | Intergenic |            |
| chr2  | 8,421,482  | 1.64E-02 | 5.08E-01 | 0.775 | 77,193 | 0.561  | 56,140 | 0.126  | 12,466 | 4.093  | 0.096  | 9,605  | 1,921 | -0.211 | -21,053 | 653.19 | ca             | Open Sea   | Intergenic |            |
| chr2  | 8,422,210  | 1.90E-02 | 4.91E-02 | 0.782 | 78,462 | 0.586  | 58,621 | 0.125  | 12,466 | 4.093  | 0.096  | 9,605  | 1,921 | -0.211 | -21,053 | 653.19 | --             | Open Sea   | Intergenic |            |
| chr2  | 10,177,039 | 4.71E-02 | 4.71E-02 | 0.458 | 45,833 | 0.314  | 31,394 | 0.186  | 18,634 | 3.121  | 0.121  | 12,104 | 2,421 | -0.191 | -19,061 | 654.19 | --             | Open Sea   | Intergenic |            |
| chr2  | 9,177,632  | 1.77E-02 | 1.57E-02 | 0.333 | 33,333 | 0.680  | 68,000 | 0.134  | 13,365 | 3.673  | 0.366  | 36,609 | 7,322 | 0.347  | 34,667  | 654.19 | -G             | Open Sea   | Intergenic |            |
| chr2  | 10,812,987 | 4.71E-02 | 4.71E-02 | 0.827 | 82,892 | 0.714  | 71,429 | 0.103  | 10,304 | 2.061  | 0.150  | 15,004 | 3,001 | -0.113 | -11,264 | 655.19 | --             | Open Sea   | Intergenic |            |
| chr2  | 10,813,533 | 2.56E-03 | 1.30E-01 | 0.639 | 63,889 | 0.227  |        |        |        |        |        |        |       |        |         |        |                |            |            |            |



|     |            |          |          |       |        |       |        |       |        |       |       |        |       |        |         |       |                |                |                  |            |
|-----|------------|----------|----------|-------|--------|-------|--------|-------|--------|-------|-------|--------|-------|--------|---------|-------|----------------|----------------|------------------|------------|
| ch2 | 57,212,169 | 1.57E-03 | 1.52E-03 | 0.226 | 22.642 | 0.476 | 47.619 | 0.147 | 14.655 | 2.931 | 0.221 | 22.142 | 4.428 | 0.250  | 24.978  | 675.2 | --             | N Shelf        | Intergenic       |            |
| ch2 | 57,212,185 | 1.52E-02 | 1.52E-03 | 0.164 | 16.393 | 0.380 | 37.975 | 0.138 | 13.827 | 2.765 | 0.186 | 18.590 | 3.718 | 0.216  | 21.581  | 675.2 | --             | N Shelf        | Intergenic       |            |
| ch2 | 58,161,021 | 6.05E-02 | 6.05E-02 | 0.825 | 82.456 | 0.649 | 64.912 | 0.181 | 18.157 | 3.626 | 0.198 | 18.757 | 3.751 | 0.175  | -17.544 | 676.2 | TG             | Open Sea       | Cyp              |            |
| ch2 | 58,161,021 | 3.69E-02 | 6.05E-02 | 0.825 | 82.456 | 0.649 | 64.912 | 0.181 | 18.126 | 3.625 | 0.186 | 18.757 | 3.751 | -0.175 | -17.544 | 676.2 | TG             | Open Sea       | Intron 1/7       |            |
| ch2 | 58,161,021 | 3.69E-02 | 6.05E-02 | 0.825 | 82.456 | 0.649 | 64.912 | 0.181 | 18.126 | 3.625 | 0.186 | 18.757 | 3.751 | -0.175 | -17.544 | 676.2 | TG             | Open Sea       | Intron 1/8       |            |
| ch2 | 58,161,025 | 4.40E-02 | 6.05E-02 | 0.825 | 82.456 | 0.607 | 60.714 | 0.158 | 15.843 | 3.169 | 0.137 | 13.727 | 2.745 | -0.217 | -21.742 | 676.2 | TT             | Open Sea       | TSS 1500         |            |
| ch2 | 58,161,025 | 4.40E-02 | 6.05E-02 | 0.825 | 82.456 | 0.607 | 60.714 | 0.158 | 15.843 | 3.169 | 0.137 | 13.727 | 2.745 | -0.217 | -21.742 | 676.2 | TT             | Open Sea       | TSS 1500         |            |
| ch2 | 58,161,025 | 4.40E-02 | 6.05E-02 | 0.825 | 82.456 | 0.607 | 60.714 | 0.158 | 15.843 | 3.169 | 0.137 | 13.727 | 2.745 | -0.217 | -21.742 | 676.2 | TT             | Open Sea       | TSS 1500         |            |
| ch2 | 58,161,034 | 6.80E-03 | 6.05E-02 | 0.722 | 72.222 | 0.462 | 46.154 | 0.123 | 12.273 | 2.455 | 0.229 | 22.927 | 4.585 | -0.261 | -26.068 | 676.2 | C-             | Open Sea       | Cyp              |            |
| ch2 | 58,161,034 | 6.80E-03 | 6.05E-02 | 0.722 | 72.222 | 0.462 | 46.154 | 0.123 | 12.273 | 2.455 | 0.229 | 22.927 | 4.585 | -0.261 | -26.068 | 676.2 | C-             | Open Sea       | Cyp              |            |
| ch2 | 58,336,779 | 5.47E-03 | 2.17E-05 | 0.085 | 8.475  | 0.286 | 28.571 | 0.065 | 6.471  | 1.294 | 0.092 | 9.185  | 1.837 | 0.201  | 20.097  | 677.2 | Check manually | Open Sea       | Intron 1/8       |            |
| ch2 | 58,336,803 | 2.47E-02 | 2.01E-05 | 0.133 | 13.333 | 0.309 | 30.909 | 0.401 | 40.085 | 8.017 | 0.088 | 9.759  | 1.952 | 0.176  | 17.576  | 677.2 | ct             | Open Sea       | Intron 1/8       |            |
| ch2 | 61,068,603 | 3.79E-03 | 5.93E-03 | 0.281 | 28.070 | 0.594 | 59.375 | 0.143 | 14.291 | 2.858 | 0.187 | 18.699 | 3.740 | 0.313  | 31.305  | 678.2 | --             | Open Sea       | Intergenic       |            |
| ch2 | 61,068,602 | 3.21E-02 | 7.34E-04 | 0.089 | 88.889 | 0.157 | 15.683 | 0.132 | 13.227 | 2.931 | 0.088 | 8.613  | 1.723 | 0.152  | 15.205  | 678.2 | --             | Open Sea       | Intergenic       |            |
| ch2 | 61,111,157 | 2.36E-02 | 1.87E-04 | 0.140 | 13.953 | 0.375 | 37.500 | 0.074 | 7.441  | 1.488 | 0.173 | 17.253 | 3.451 | 0.235  | 23.547  | 679.2 | Check manually | Open Sea       | Intergenic       |            |
| ch2 | 61,111,219 | 3.88E-02 | 5.08E-04 | 0.103 | 10.256 | 0.342 | 34.211 | 0.096 | 9.569  | 1.914 | 0.235 | 23.542 | 4.708 | 0.240  | 23.954  | 679.2 | Check manually | Open Sea       | Intergenic       |            |
| ch2 | 61,111,250 | 6.05E-03 | 5.08E-04 | 0.097 | 9.677  | 0.462 | 46.154 | 0.393 | 20.79  | 2.079 | 0.271 | 27.551 | 5.510 | 0.365  | 36.476  | 679.2 | Check manually | Open Sea       | Intergenic       |            |
| ch2 | 63,737,005 | 2.41E-02 | 2.41E-01 | 0.891 | 89.130 | 0.629 | 62.857 | 0.112 | 11.244 | 2.240 | 0.181 | 18.104 | 3.621 | -0.263 | -26.273 | 680.2 | TT             | Open Sea       | Intergenic       |            |
| ch2 | 63,737,932 | 2.41E-02 | 2.41E-02 | 0.452 | 45.161 | 0.733 | 73.333 | 0.110 | 10.994 | 2.199 | 0.348 | 34.763 | 6.953 | 0.282  | 28.172  | 680.2 | --             | Open Sea       | Intergenic       |            |
| ch2 | 64,118,106 | 4.01E-02 | 1.44E-04 | 0.577 | 57.692 | 0.828 | 82.759 | 0.214 | 21.369 | 4.274 | 0.183 | 18.316 | 3.663 | 0.251  | 25.066  | 681.2 | --             | Check manually | Open Sea         | Intergenic |
| ch2 | 64,118,209 | 3.26E-04 | 1.44E-04 | 0.411 | 41.066 | 0.767 | 76.867 | 0.115 | 11.463 | 2.293 | 0.125 | 12.525 | 2.505 | 0.356  | 35.571  | 681.2 | --             | Open Sea       | Intergenic       |            |
| ch2 | 64,769,828 | 1.21E-02 | 1.21E-01 | 0.442 | 44.186 | 0.637 | 63.725 | 0.123 | 12.270 | 2.454 | 0.056 | 5.554  | 1.111 | 0.195  | 19.539  | 682.2 | ta             | Open Sea       | Intergenic       |            |
| ch2 | 64,769,849 | 3.50E-02 | 1.21E-01 | 0.396 | 39.604 | 0.551 | 55.140 | 0.123 | 12.250 | 2.450 | 0.147 | 14.703 | 2.941 | 0.155  | 15.536  | 682.2 | GA             | Open Sea       | Intergenic       |            |
| ch2 | 66,648,727 | 4.10E-02 | 3.23E-01 | 0.718 | 71.795 | 0.897 | 89.744 | 0.136 | 13.645 | 2.729 | 0.096 | 9.569  | 1.914 | 0.179  | 17.949  | 683.2 | --             | Open Sea       | Intergenic       |            |
| ch2 | 66,648,689 | 1.66E-02 | 2.80E-02 | 0.717 | 71.717 | 0.873 | 87.302 | 0.163 | 16.277 | 3.655 | 0.058 | 5.646  | 1.169 | 0.156  | 15.584  | 683.2 | CC             | Open Sea       | Intergenic       |            |
| ch2 | 68,114,371 | 1.84E-03 | 7.66E-03 | 0.581 | 67.133 | 0.759 | 75.861 | 0.590 | 59.077 | 1.920 | 0.055 | 5.488  | 1.020 | 0.127  | 12.729  | 684.2 | Check manually | Open Sea       | Intergenic       |            |
| ch2 | 68,114,375 | 1.79E-03 | 2.51E-03 | 0.757 | 57.042 | 0.757 | 76.876 | 0.164 | 16.383 | 3.277 | 0.078 | 7.806  | 1.561 | 0.186  | 16.633  | 684.2 | --             | Open Sea       | Intergenic       |            |
| ch2 | 68,243,794 | 2.04E-02 | 1.24E-02 | 0.816 | 81.579 | 0.646 | 64.557 | 0.103 | 10.293 | 2.059 | 0.097 | 9.682  | 1.936 | -0.170 | -17.022 | 685.2 | TG             | Open Sea       | Intron 16/17     |            |
| ch2 | 68,243,951 | 4.27E-02 | 2.15E-01 | 0.718 | 71.795 | 0.897 | 89.744 | 0.136 | 13.645 | 2.729 | 0.096 | 9.569  | 1.914 | 0.179  | 17.949  | 685.2 | CA             | Open Sea       | Intergenic       |            |
| ch2 | 68,317,610 | 2.10E-02 | 2.82E-03 | 0.775 | 77.500 | 0.500 | 50.000 | 0.143 | 14.204 | 2.859 | 0.299 | 25.940 | 5.188 | -0.275 | -27.500 | 686.2 | --             | Open Sea       | Intron 10/17     |            |
| ch2 | 68,317,617 | 2.02E-02 | 2.82E-03 | 0.610 | 60.976 | 0.289 | 28.923 | 0.150 | 15.039 | 3.008 | 0.231 | 23.132 | 4.626 | -0.341 | -34.053 | 686.2 | --             | Open Sea       | Intron 10/17     |            |
| ch2 | 78,255,400 | 3.55E-02 | 2.26E-02 | 0.571 | 57.143 | 0.784 | 78.431 | 0.215 | 21.498 | 4.300 | 0.022 | 2.167  | 0.433 | 0.213  | 21.289  | 687.2 | TT             | Open Sea       | Intergenic       |            |
| ch2 | 78,255,477 | 2.43E-02 | 2.26E-02 | 0.642 | 64.200 | 0.702 | 70.000 | 0.062 | 6.181  | 1.59  | 0.278 | 2.78   | 0.514 | 0.258  | 25.814  | 687.2 | TA             | Open Sea       | Intergenic       |            |
| ch2 | 81,255,147 | 2.80E-02 | 2.80E-02 | 0.593 | 59.259 | 0.833 | 83.333 | 0.172 | 17.206 | 3.441 | 0.175 | 17.501 | 3.500 | 0.241  | 24.074  | 688.2 | --             | Open Sea       | Intergenic       |            |
| ch2 | 81,255,521 | 1.94E-02 | 4.97E-02 | 0.833 | 83.333 | 0.604 | 60.377 | 0.134 | 13.439 | 2.688 | 0.202 | 20.202 | 4.040 | -0.230 | -22.956 | 688.2 | --             | Open Sea       | Intergenic       |            |
| ch2 | 81,709,819 | 3.00E-02 | 3.00E-02 | 0.552 | 55.172 | 0.840 | 84.000 | 0.218 | 21.752 | 4.350 | 0.231 | 23.113 | 4.623 | 0.288  | 28.828  | 689.2 | --             | Open Sea       | Intergenic       |            |
| ch2 | 81,709,694 | 4.26E-02 | 3.00E-02 | 0.552 | 55.172 | 0.840 | 84.000 | 0.218 | 21.752 | 4.350 | 0.231 | 23.113 | 4.623 | 0.288  | 28.828  | 689.2 | --             | Open Sea       | Intergenic       |            |
| ch2 | 82,229,413 | 3.72E-03 | 1.33E-02 | 0.746 | 74.590 | 0.889 | 88.889 | 0.038 | 3.765  | 0.753 | 0.061 | 6.077  | 1.215 | 0.143  | 14.299  | 690.2 | --             | Open Sea       | Intergenic       |            |
| ch2 | 82,229,421 | 1.33E-02 | 1.33E-02 | 0.746 | 74.510 | 0.862 | 86.154 | 0.087 | 8.654  | 1.731 | 0.067 | 6.697  | 1.339 | 0.107  | 10.744  | 690.2 | --             | Open Sea       | Intergenic       |            |
| ch2 | 82,421,175 | 3.72E-02 | 2.89E-03 | 0.684 | 68.354 | 0.481 | 48.148 | 0.207 | 20.716 | 4.143 | 0.047 | 4.706  | 0.941 | -0.202 | -20.206 | 691.2 | --             | Open Sea       | Intergenic       |            |
| ch2 | 82,421,240 | 2.42E-02 | 2.89E-03 | 0.684 | 68.354 | 0.481 | 48.148 | 0.207 | 20.716 | 4.143 | 0.047 | 4.706  | 0.941 | -0.202 | -20.206 | 691.2 | --             | Open Sea       | Intergenic       |            |
| ch2 | 82,832,194 | 2.69E-02 | 9.98E-05 | 0.300 | 30.000 | 0.571 | 57.143 | 0.196 | 19.615 | 3.923 | 0.136 | 13.627 | 2.725 | 0.271  | 27.143  | 692.2 | TG             | Open Sea       | Intergenic       |            |
| ch2 | 82,832,197 | 3.85E-02 | 9.98E-05 | 0.276 | 27.586 | 0.528 | 52.778 | 0.380 | 37.990 | 7.598 | 0.123 | 12.300 | 2.460 | 0.252  | 25.192  | 692.2 | TG             | Open Sea       | Intergenic       |            |
| ch2 | 83,238,802 | 1.68E-02 | 1.09E-02 | 0.625 | 62.500 | 0.848 | 84.783 | 0.205 | 20.468 | 4.094 | 0.101 | 10.113 | 2.023 | 0.223  | 22.283  | 693.2 | --             | Open Sea       | Intergenic       |            |
| ch2 | 83,239,307 | 5.81E-02 | 0.36E-02 | 0.625 | 62.500 | 0.848 | 84.783 | 0.205 | 20.468 | 4.094 | 0.101 | 10.113 | 2.023 | 0.223  | 22.283  | 693.2 | --             | Open Sea       | Intergenic       |            |
| ch2 | 83,740,463 | 4.11E-02 | 2.14E-02 | 0.552 | 55.224 | 0.739 | 73.913 | 0.205 | 20.454 | 4.091 | 0.248 | 24.819 | 4.964 | 0.187  | 16.689  | 694.2 | TG             | Open Sea       | Intron 2/29      |            |
| ch2 | 83,740,463 | 4.11E-02 | 2.14E-02 | 0.552 | 55.224 | 0.739 | 73.913 | 0.205 | 20.454 | 4.091 | 0.248 | 24.819 | 4.964 | 0.187  | 16.689  | 694.2 | TG             | Open Sea       | Intron 2/29      |            |
| ch2 | 83,740,463 | 1.39E-02 | 1.14E-02 | 0.413 | 41.270 | 0.681 | 68.085 | 0.310 | 31.009 | 6.202 | 0.172 | 17.208 | 3.442 | 0.268  | 26.815  | 694.2 | AG             | Open Sea       | Intron 2/29      |            |
| ch2 | 83,740,462 | 1.39E-02 | 1.14E-02 | 0.413 | 41.270 | 0.681 | 68.085 | 0.310 | 31.009 | 6.202 | 0.172 | 17.208 | 3.442 | 0.268  | 26.815  | 694.2 | AG             | Open Sea       | Intron 2/29      |            |
| ch2 | 84,938,995 | 8.96E-03 | 7.18E-04 | 0.734 | 73.418 | 0.500 | 50.000 | 0.142 | 14.152 | 2.830 | 0.180 | 17.983 | 3.597 | -0.234 | -23.418 | 695.2 | --             | Open Sea       | Intron 3/12      |            |
| ch2 | 84,938,995 | 8.96E-03 | 7.18E-04 | 0.734 | 73.418 | 0.500 | 50.000 | 0.142 | 14.152 | 2.830 | 0.180 | 17.983 | 3.597 | -0.234 | -23.418 | 695.2 | --             | Open Sea       | false intergenic |            |
| ch2 | 84,938,995 | 8.96E-03 | 7.18E-04 | 0.734 | 73.418 | 0.500 | 50.000 | 0.142 | 14.152 | 2.830 | 0.180 | 17.983 | 3.597 | -0.234 | -23.418 | 695.2 | --             | Open Sea       | false intergenic |            |
| ch2 | 84,938,995 | 8.96E-03 | 7.18E-04 | 0.734 | 73.418 | 0.500 | 50.000 | 0.142 | 14.152 | 2.830 | 0.180 | 17.983 | 3.597 | -0.234 | -23.418 | 695.2 | --             | Open Sea       | false intergenic |            |
| ch2 | 84,938,028 | 1.33E-02 | 2.07E-03 | 0.778 | 77.778 | 0.589 | 58.879 | 0.108 | 10.833 | 2.167 | 0.139 | 13.946 | 2.789 | -0.189 | -18.899 | 695.2 | --             | Open Sea       | Intron 3/12      |            |
| ch2 | 84,938,028 | 1.33E-02 | 2.07E-03 | 0.778 | 77.778 | 0.589 | 58.879 | 0.108 | 10.833 | 2.167 | 0.139 | 13.946 | 2.789 | -0.189 | -18.899 | 695.2 | --             | Open Sea       | false intergenic |            |
| ch2 | 84,938,028 | 1.33E-02 | 2.07E-03 | 0.778 | 77.778 | 0.589 | 58.879 | 0.108 | 10.833 | 2.167 | 0.139 | 13.946 | 2.789 | -0.189 | -18.899 | 695.2 | --             | Open Sea       | false intergenic |            |
| ch2 | 84,938,028 | 1.33E-02 | 2.07E-03 | 0.778 | 77.778 | 0.589 | 58.879 | 0.108 | 10.833 | 2.167 | 0.139 | 13.946 | 2.789 | -0.189 | -18.899 | 695.2 | --             | Open Sea       | false intergenic |            |
| ch2 | 85,924,564 | 4.42E-02 | 2.04E-02 | 0.545 | 54.545 | 0.726 | 72.581 | 0.223 | 22.301 | 4.460 | 0.357 | 35.744 | 7.149 | 0.180  | 18.035  | 696.2 | --             | Open Sea       | Intergenic       |            |
| ch2 | 85,924,568 | 2.05E-02 | 2.04E-02 | 0.746 | 74.627 | 0.840 | 84.000 | 0.148 | 14.752 | 2.950 | 0.066 | 6.617  | 1.323 | 0.157  | 15.696  | 696.2 | --             | Open Sea       | Intergenic       |            |
| ch2 | 87,113,731 | 4.33E-02 | 2.36E-03 | 0.634 | 63.448 | 0.763 | 76.301 | 0.183 |        |       |       |        |       |        |         |       |                |                |                  |            |



|        |             |          |          |       |        |       |        |       |        |       |       |        |       |        |         |       |    |           |                  |            |
|--------|-------------|----------|----------|-------|--------|-------|--------|-------|--------|-------|-------|--------|-------|--------|---------|-------|----|-----------|------------------|------------|
| chr2   | 163,323,911 | 1.17E-02 | 1.42E-05 | 0.795 | 79.524 | 0.682 | 68.240 | 0.111 | 11.110 | 2.222 | 0.065 | 6.480  | 1.296 | -0.113 | -11.283 | 720.2 | -- | Open Sea  | Intergenic       |            |
| chr2   | 163,324,051 | 7.99E-03 | 1.84E-03 | 0.781 | 78.125 | 0.447 | 44.737 | 0.184 | 18.420 | 3.684 | 0.269 | 26.887 | 5.377 | -0.334 | -33.388 | 720.2 | -- | Open Sea  | Intergenic       |            |
| chr2   | 165,173,727 | 3.65E-02 | 3.39E-01 | 0.886 | 88.552 | 0.927 | 92.723 | 0.082 | 8.673  | 1.643 | 0.167 | 16.473 | 3.355 | -0.168 | -16.825 | 721.2 | -- | Open Sea  | Intergenic       | Chr2       |
| chr2   | 165,174,503 | 3.73E-02 | 1.00E-01 | 0.688 | 68.841 | 0.555 | 55.474 | 0.158 | 15.819 | 3.164 | 0.155 | 15.467 | 3.093 | -0.134 | -13.366 | 721.2 | -- | S Shelf   | Intron 2/11      | Cdr22      |
| chr2   | 169,298,188 | 3.15E-02 | 5.73E-03 | 0.800 | 80.000 | 0.476 | 47.619 | 0.419 | 41.874 | 8.375 | 0.354 | 35.443 | 7.089 | -0.324 | -32.381 | 722.2 | -- | Open Sea  | Intergenic       |            |
| chr2   | 169,298,190 | 9.17E-03 | 5.73E-03 | 0.750 | 75.000 | 0.304 | 30.435 | 0.196 | 19.632 | 3.926 | 0.242 | 22.361 | 4.472 | -0.446 | -44.565 | 722.2 | -- | Open Sea  | Intergenic       |            |
| chr2   | 169,655,943 | 3.40E-02 | 2.29E-01 | 0.370 | 37.037 | 0.643 | 64.286 | 0.242 | 24.164 | 4.833 | 0.272 | 27.174 | 5.435 | -0.272 | -27.249 | 723.2 | -- | Open Sea  | Intergenic       | Gm26883    |
| chr2   | 169,655,943 | 3.40E-02 | 2.29E-01 | 0.370 | 37.037 | 0.643 | 64.286 | 0.242 | 24.164 | 4.833 | 0.272 | 27.174 | 5.435 | -0.272 | -27.249 | 723.2 | -- | Open Sea  | Intergenic       | Tsh2       |
| chr2   | 169,655,890 | 3.60E-02 | 2.07E-02 | 0.571 | 57.143 | 0.772 | 77.193 | 0.205 | 20.467 | 4.093 | 0.126 | 12.577 | 2.515 | -0.201 | -20.050 | 723.2 | -- | Open Sea  | Intron 2/2       | Gm26883    |
| chr2   | 171,806,764 | 3.31E-02 | 2.72E-02 | 0.598 | 59.756 | 0.743 | 74.312 | 0.204 | 20.410 | 4.082 | 0.046 | 4.569  | 0.914 | -0.146 | -14.556 | 724.2 | -- | Open Sea  | Intergenic       | Tsh2       |
| chr2   | 172,293,680 | 3.37E-02 | 3.78E-02 | 0.786 | 78.571 | 0.894 | 89.423 | 0.184 | 18.427 | 3.685 | 0.069 | 6.939  | 1.388 | -0.109 | -10.852 | 725.2 | -- | Open Sea  | Intergenic       |            |
| chr2   | 172,293,624 | 4.74E-02 | 4.99E-02 | 0.900 | 90.000 | 0.750 | 75.000 | 0.743 | 73.45  | 1.469 | 0.143 | 14.339 | 2.868 | -0.150 | -15.000 | 725.2 | -- | Open Sea  | Intergenic       |            |
| chr2   | 172,401,110 | 4.14E-02 | 2.29E-02 | 0.868 | 78.769 | 0.574 | 57.377 | 0.228 | 22.827 | 4.565 | 0.161 | 16.104 | 3.221 | -0.214 | -21.411 | 726.2 | -- | Open Sea  | Intergenic       |            |
| chr2   | 172,401,166 | 2.54E-02 | 2.29E-02 | 0.707 | 70.690 | 0.519 | 51.899 | 0.106 | 10.589 | 2.118 | 0.094 | 9.441  | 1.888 | -0.188 | -18.791 | 726.2 | -- | Open Sea  | Intergenic       |            |
| chr2   | 172,596,550 | 1.89E-02 | 1.07E-01 | 0.861 | 86.111 | 0.577 | 57.692 | 0.125 | 12.453 | 2.491 | 0.298 | 29.814 | 5.963 | -0.284 | -28.419 | 727.2 | -- | Open Sea  | Intergenic       |            |
| chr2   | 172,596,890 | 2.45E-02 | 2.45E-02 | 0.724 | 72.376 | 0.600 | 60.000 | 0.149 | 14.889 | 2.978 | 0.067 | 6.707  | 1.341 | -0.124 | -12.376 | 727.2 | -- | Open Sea  | Intergenic       |            |
| chr2   | 173,164,609 | 1.35E-02 | 2.53E-04 | 0.886 | 88.636 | 0.636 | 63.636 | 0.091 | 9.077  | 1.815 | 0.188 | 18.833 | 3.576 | -0.250 | -25.000 | 728.2 | -- | Open Sea  | Intergenic       |            |
| chr2   | 173,164,633 | 2.34E-03 | 9.29E-04 | 0.815 | 81.481 | 0.381 | 38.095 | 0.155 | 15.454 | 3.091 | 0.127 | 12.728 | 2.546 | -0.434 | -43.386 | 728.2 | -- | Open Sea  | Intergenic       |            |
| chr2   | 173,586,315 | 1.36E-02 | 3.90E-04 | 0.505 | 50.467 | 0.310 | 30.986 | 0.130 | 12.956 | 2.591 | 0.104 | 10.435 | 2.087 | -0.195 | -19.481 | 729.2 | -- | N Shore   | Intron 13/14     | Ppp4r1-ps  |
| chr2   | 173,586,315 | 1.36E-02 | 3.90E-04 | 0.505 | 50.467 | 0.310 | 30.986 | 0.130 | 12.956 | 2.591 | 0.104 | 10.435 | 2.087 | -0.195 | -19.481 | 729.2 | -- | N Shore   | check manually   | Ppp4r1-ps  |
| chr2   | 173,586,315 | 1.36E-02 | 3.90E-04 | 0.505 | 50.467 | 0.310 | 30.986 | 0.130 | 12.956 | 2.591 | 0.104 | 10.435 | 2.087 | -0.195 | -19.481 | 729.2 | -- | N Shore   | false intergenic | Ppp4r1-ps  |
| chr2   | 173,586,337 | 6.24E-03 | 2.95E-03 | 0.612 | 61.224 | 0.394 | 39.394 | 0.075 | 7.490  | 1.498 | 0.108 | 10.836 | 2.167 | -0.218 | -21.831 | 729.2 | -- | N Shore   | Intron 13/14     | Ppp4r1-ps  |
| chr2   | 173,586,337 | 6.24E-03 | 2.95E-03 | 0.612 | 61.224 | 0.394 | 39.394 | 0.075 | 7.490  | 1.498 | 0.108 | 10.836 | 2.167 | -0.218 | -21.831 | 729.2 | -- | N Shore   | Intron 14/15     | Ppp4r1-ps  |
| chr2   | 173,586,337 | 6.24E-03 | 2.95E-03 | 0.612 | 61.224 | 0.394 | 39.394 | 0.075 | 7.490  | 1.498 | 0.108 | 10.836 | 2.167 | -0.218 | -21.831 | 729.2 | -- | N Shore   | check manually   | Ppp4r1-ps  |
| chr2   | 173,586,337 | 6.24E-03 | 2.95E-03 | 0.612 | 61.224 | 0.394 | 39.394 | 0.075 | 7.490  | 1.498 | 0.108 | 10.836 | 2.167 | -0.218 | -21.831 | 729.2 | -- | N Shore   | false intergenic | Ppp4r1-ps  |
| chr2   | 173,586,365 | 3.44E-02 | 1.45E-03 | 0.548 | 54.808 | 0.390 | 39.861 | 0.172 | 17.225 | 3.445 | 0.068 | 6.822  | 1.364 | -0.158 | -15.847 | 729.2 | -- | N Shore   | Intron 13/14     | Ppp4r1-ps  |
| chr2   | 173,586,365 | 3.44E-02 | 1.45E-03 | 0.548 | 54.808 | 0.390 | 39.861 | 0.172 | 17.225 | 3.445 | 0.068 | 6.822  | 1.364 | -0.158 | -15.847 | 729.2 | -- | N Shore   | check manually   | Ppp4r1-ps  |
| chr2   | 173,586,365 | 3.44E-02 | 1.45E-03 | 0.548 | 54.808 | 0.390 | 39.861 | 0.172 | 17.225 | 3.445 | 0.068 | 6.822  | 1.364 | -0.158 | -15.847 | 729.2 | -- | N Shore   | check manually   | Ppp4r1-ps  |
| chr2   | 173,586,365 | 3.44E-02 | 1.45E-03 | 0.548 | 54.808 | 0.390 | 39.861 | 0.172 | 17.225 | 3.445 | 0.068 | 6.822  | 1.364 | -0.158 | -15.847 | 729.2 | -- | N Shore   | false intergenic | Ppp4r1-ps  |
| chr2   | 173,586,375 | 2.11E-02 | 9.23E-04 | 0.605 | 60.526 | 0.420 | 42.045 | 0.291 | 29.144 | 5.829 | 0.076 | 7.620  | 1.524 | -0.185 | -18.481 | 729.2 | -- | N Shore   | Intron 13/14     | Ppp4r1-ps  |
| chr2   | 173,586,375 | 2.11E-02 | 9.23E-04 | 0.605 | 60.526 | 0.420 | 42.045 | 0.291 | 29.144 | 5.829 | 0.076 | 7.620  | 1.524 | -0.185 | -18.481 | 729.2 | -- | N Shore   | check manually   | Ppp4r1-ps  |
| chr2   | 173,586,375 | 2.11E-02 | 9.23E-04 | 0.605 | 60.526 | 0.420 | 42.045 | 0.291 | 29.144 | 5.829 | 0.076 | 7.620  | 1.524 | -0.185 | -18.481 | 729.2 | -- | N Shore   | check manually   | Ppp4r1-ps  |
| chr2   | 173,586,375 | 2.11E-02 | 9.23E-04 | 0.605 | 60.526 | 0.420 | 42.045 | 0.291 | 29.144 | 5.829 | 0.076 | 7.620  | 1.524 | -0.185 | -18.481 | 729.2 | -- | N Shore   | false intergenic | Ppp4r1-ps  |
| chr2   | 176,768,500 | 9.30E-03 | 7.88E-04 | 0.500 | 50.000 | 0.671 | 67.143 | 0.135 | 13.453 | 2.691 | 0.080 | 8.006  | 1.601 | -0.171 | -17.143 | 730.2 | -- | Open Sea  | Intergenic       |            |
| chr3   | 4,363,977   | 4.50E-03 | 1.03E-01 | 0.200 | 20.000 | 0.800 | 80.000 | 0.167 | 16.667 | 3.333 | 0.418 | 41.833 | 8.367 | -0.600 | -60.000 | 731.3 | -- | CG nearby | Open Sea         | Intergenic |
| chr3   | 4,364,472   | 1.17E-02 | 2.74E-01 | 0.214 | 21.429 | 0.398 | 39.773 | 0.208 | 20.776 | 2.155 | 0.140 | 14.017 | 2.803 | -0.183 | -18.344 | 731.3 | -- | Open Sea  | Intergenic       |            |
| chr3   | 5,860,349   | 3.04E-02 | 1.83E-03 | 0.148 | 14.815 | 0.263 | 26.263 | 0.141 | 24.085 | 4.817 | 0.034 | 3.425  | 0.685 | -0.114 | -11.448 | 732.3 | -- | N Shore   | Intergenic       |            |
| chr3   | 5,860,351   | 1.68E-03 | 1.83E-03 | 0.175 | 17.483 | 0.309 | 30.769 | 0.155 | 15.515 | 3.067 | 0.094 | 3.329  | 0.404 | -0.103 | -10.387 | 732.3 | -- | N Shore   | Intergenic       |            |
| chr3   | 7,342,995   | 8.29E-03 | 2.40E-03 | 0.294 | 29.412 | 0.640 | 64.000 | 0.214 | 16.413 | 3.283 | 0.236 | 23.570 | 4.714 | -0.346 | -34.588 | 733.3 | -- | Open Sea  | Intergenic       |            |
| chr3   | 7,343,064   | 2.93E-02 | 2.40E-03 | 0.347 | 34.694 | 0.625 | 62.500 | 0.165 | 15.545 | 4.309 | 0.265 | 26.484 | 5.297 | -0.278 | -27.806 | 733.3 | -- | Open Sea  | Intergenic       |            |
| chr3   | 7,599,133   | 4.68E-02 | 4.68E-02 | 0.556 | 55.556 | 0.800 | 80.000 | 0.274 | 27.396 | 5.477 | 0.205 | 20.466 | 4.093 | -0.244 | -24.444 | 734.3 | -- | Open Sea  | Intergenic       |            |
| chr3   | 7,599,018   | 3.04E-02 | 8.00E-03 | 0.458 | 45.833 | 0.410 | 41.015 | 0.251 | 25.105 | 4.203 | 0.183 | 18.202 | 3.442 | -0.142 | -14.442 | 734.3 | -- | Open Sea  | Intergenic       |            |
| chr3   | 11,361,638  | 1.73E-03 | 1.04E-01 | 0.419 | 41.935 | 0.778 | 77.778 | 0.274 | 27.394 | 5.479 | 0.248 | 24.208 | 4.842 | -0.358 | -35.842 | 735.3 | -- | Open Sea  | Intergenic       |            |
| chr3   | 11,361,653  | 2.73E-02 | 1.04E-01 | 0.618 | 61.765 | 0.862 | 86.207 | 0.232 | 23.202 | 4.640 | 0.123 | 12.258 | 2.452 | -0.244 | -24.442 | 735.3 | -- | Open Sea  | Intergenic       |            |
| chr3   | 11,608,460  | 2.28E-02 | 8.00E-03 | 0.379 | 37.931 | 0.696 | 69.585 | 0.325 | 32.498 | 6.500 | 0.190 | 19.017 | 3.803 | -0.316 | -31.634 | 736.3 | -- | Open Sea  | Intergenic       |            |
| chr3   | 11,608,470  | 1.84E-02 | 8.00E-03 | 0.250 | 25.000 | 0.571 | 57.143 | 0.350 | 35.000 | 3.709 | 0.358 | 35.777 | 7.155 | -0.321 | -32.143 | 736.3 | -- | Open Sea  | Intergenic       |            |
| chr3   | 12,711,037  | 1.74E-02 | 3.11E-01 | 0.647 | 64.706 | 0.828 | 82.813 | 0.168 | 16.762 | 3.352 | 0.159 | 15.914 | 3.183 | -0.181 | -18.107 | 737.3 | -- | Open Sea  | Intergenic       |            |
| chr3   | 12,711,922  | 3.94E-02 | 3.94E-02 | 0.591 | 59.091 | 0.292 | 29.167 | 0.271 | 27.063 | 5.413 | 0.200 | 20.041 | 4.008 | -0.299 | -29.924 | 737.3 | -- | Open Sea  | Intergenic       |            |
| chr3   | 13,021,450  | 2.98E-02 | 1.87E-01 | 0.763 | 76.316 | 0.512 | 51.220 | 0.244 | 24.428 | 4.886 | 0.139 | 13.877 | 2.775 | -0.251 | -25.096 | 738.3 | -- | Open Sea  | Intergenic       |            |
| chr3   | 13,021,601  | 4.13E-02 | 8.19E-03 | 0.386 | 38.583 | 0.609 | 60.870 | 0.133 | 13.294 | 3.218 | 0.078 | 7.874  | 1.660 | -0.213 | -21.285 | 738.3 | -- | Open Sea  | Intergenic       |            |
| chr3   | 13,235,507  | 8.03E-03 | 9.84E-03 | 0.864 | 86.441 | 0.661 | 66.229 | 0.082 | 8.170  | 1.634 | 0.074 | 1.761  | 1.472 | -0.203 | -20.312 | 739.3 | -- | Open Sea  | Intergenic       |            |
| chr3   | 13,235,545  | 3.61E-02 | 9.44E-02 | 0.872 | 87.234 | 0.696 | 69.565 | 0.071 | 7.085  | 1.417 | 0.266 | 26.645 | 5.329 | -0.177 | -17.669 | 739.3 | -- | Open Sea  | Intergenic       |            |
| chr3   | 14,110,666  | 9.07E-03 | 9.07E-03 | 0.405 | 40.541 | 0.711 | 71.053 | 0.277 | 27.743 | 5.549 | 0.125 | 12.462 | 2.492 | -0.305 | -30.512 | 740.3 | -- | Open Sea  | Intergenic       |            |
| chr3   | 14,111,019  | 1.13E-02 | 1.33E-02 | 0.808 | 80.769 | 0.455 | 45.455 | 0.136 | 13.649 | 3.700 | 0.237 | 23.704 | 4.453 | -0.353 | -35.353 | 741.3 | -- | Open Sea  | Intergenic       |            |
| chr3   | 15,409,359  | 2.97E-02 | 5.21E-03 | 0.309 | 30.864 | 0.479 | 47.945 | 0.160 | 15.958 | 3.192 | 0.085 | 8.546  | 1.709 | -0.171 | -17.081 | 741.3 | -- | Open Sea  | Intergenic       |            |
| chr3   | 15,409,418  | 4.50E-02 | 5.21E-03 | 0.424 | 42.391 | 0.577 | 57.732 | 0.209 | 20.878 | 4.176 | 0.276 | 27.584 | 5.517 | -0.153 | -15.341 | 741.3 | -- | Open Sea  | Intergenic       |            |
| chr3   | 15,580,524  | 7.46E-03 | 5.16E-02 | 0.566 | 56.579 | 0.800 | 80.000 | 0.150 | 14.963 | 2.993 | 0.076 | 7.593  | 1.519 | -0.234 | -23.421 | 742.3 | -- | Open Sea  | Intergenic       |            |
| chr3   | 15,581,255  | 4.99E-02 | 1.73E-01 | 0.866 | 86.616 | 0.738 | 73.810 | 0.146 | 14.634 | 2.927 | 0.094 | 9.894  | 1.859 | -0.127 | -12.677 | 742.3 | -- | Open Sea  | Intergenic       |            |
| chr3</ |             |          |          |       |        |       |        |       |        |       |       |        |       |        |         |       |    |           |                  |            |



|      |               |          |          |       |        |       |        |       |        |       |       |        |       |        |         |       |          |            |             |      |  |
|------|---------------|----------|----------|-------|--------|-------|--------|-------|--------|-------|-------|--------|-------|--------|---------|-------|----------|------------|-------------|------|--|
| chr3 | 50,031,405    | 3.15E-02 | 3.15E-02 | 0.724 | 72.414 | 0.375 | 37.500 | 0.385 | 38.471 | 7.694 | 0.261 | 26.087 | 5.217 | -0.349 | -34.914 | 766.3 | --       | Open Sea   | Intergenic  |      |  |
| chr3 | 51,901,694    | 4.39E-02 | 5.36E-03 | 0.286 | 28.571 | 0.607 | 60.714 | 0.271 | 27.083 | 5.417 | 0.305 | 30.450 | 6.090 | 0.321  | 32.143  | 767.3 | CT       | Open Sea   | Intron 1/4  | Mam3 |  |
| chr3 | 51,901,730.45 | 4.39E-02 | 5.36E-03 | 0.286 | 28.571 | 0.607 | 60.714 | 0.271 | 27.083 | 5.417 | 0.305 | 30.450 | 6.090 | 0.321  | 32.143  | 767.3 | CG       | Open Sea   | Intron 1/4  | Mam3 |  |
| chr3 | 52,091,561    | 4.13E-02 | 3.46E-04 | 0.368 | 36.842 | 0.630 | 62.963 | 0.259 | 25.863 | 5.173 | 0.217 | 21.691 | 4.338 | 0.261  | 26.121  | 768.3 | --       | Open Sea   | Intron 1/4  |      |  |
| chr3 | 52,092,026    | 9.75E-03 | 2.69E-04 | 0.115 | 11.538 | 0.450 | 45.000 | 0.093 | 9.283  | 1.857 | 0.271 | 27.065 | 5.413 | 0.335  | 33.462  | 768.3 | --       | Open Sea   | Intron 1/4  |      |  |
| chr3 | 53,650,657    | 1.09E-02 | 4.85E-02 | 0.794 | 79.412 | 0.575 | 57.500 | 0.142 | 14.150 | 2.830 | 0.114 | 11.357 | 2.271 | -0.219 | -21.912 | 769.3 | CA       | Open Sea   | Intergenic  |      |  |
| chr3 | 53,650,665    | 4.33E-02 | 3.33E-01 | 0.825 | 82.579 | 0.652 | 65.179 | 0.252 | 25.173 | 1.68  | 0.122 | 12.249 | 1.128 | -0.175 | -17.466 | 769.3 | CT       | Open Sea   | Intergenic  |      |  |
| chr3 | 54,421,506    | 4.73E-02 | 1.42E-04 | 0.343 | 34.286 | 0.575 | 57.500 | 0.166 | 16.607 | 3.321 | 0.226 | 22.550 | 4.510 | 0.232  | 23.214  | 770.3 | CA       | Open Sea   | Intergenic  |      |  |
| chr3 | 54,421,534    | 8.72E-03 | 1.42E-04 | 0.250 | 25.000 | 0.537 | 53.659 | 0.145 | 14.535 | 2.907 | 0.097 | 9.735  | 1.947 | 0.287  | 28.659  | 770.3 | tg       | Open Sea   | Intergenic  |      |  |
| chr3 | 55,079,502    | 5.17E-03 | 6.18E-01 | 0.400 | 40.000 | 0.771 | 77.143 | 0.274 | 27.424 | 5.485 | 0.080 | 7.992  | 1.598 | 0.371  | 37.143  | 771.3 | TA       | Open Sea   | Intergenic  |      |  |
| chr3 | 55,079,605    | 4.51E-02 | 1.10E-01 | 0.435 | 43.500 | 0.519 | 51.905 | 0.187 | 18.972 | 4.419 | 0.235 | 23.992 | 4.209 | 0.289  | 28.992  | 771.3 | CA       | Open Sea   | Intergenic  |      |  |
| chr3 | 56,037,967    | 2.32E-02 | 3.58E-02 | 0.640 | 64.000 | 0.843 | 84.314 | 0.172 | 17.232 | 3.446 | 0.132 | 13.223 | 2.645 | 0.203  | 20.314  | 772.3 | --       | Open Sea   | Intergenic  |      |  |
| chr3 | 58,038,104    | 3.30E-02 | 1.48E-01 | 0.786 | 78.571 | 0.888 | 88.806 | 0.223 | 22.286 | 4.457 | 0.207 | 2.736  | 0.547 | 0.102  | 10.235  | 772.3 | --       | Open Sea   | Intergenic  |      |  |
| chr3 | 61,488,752    | 4.70E-02 | 2.60E-02 | 0.542 | 54.167 | 0.776 | 77.586 | 0.273 | 27.345 | 5.469 | 0.218 | 21.831 | 4.366 | 0.234  | 23.420  | 773.3 | --       | Open Sea   | Intergenic  |      |  |
| chr3 | 61,488,912    | 4.64E-02 | 4.51E-02 | 0.400 | 40.000 | 0.704 | 70.370 | 0.217 | 21.683 | 4.01  | 0.168 | 16.219 | 4.037 | 0.201  | 20.461  | 773.3 | --       | Open Sea   | Intergenic  |      |  |
| chr3 | 69,723,137    | 4.27E-02 | 9.11E-02 | 0.304 | 30.357 | 0.531 | 53.125 | 0.232 | 23.180 | 4.636 | 0.193 | 19.263 | 3.853 | 0.228  | 22.768  | 774.3 | --       | S Shore    | Intron 2/15 | Nmd3 |  |
| chr3 | 69,723,137    | 4.27E-02 | 9.11E-02 | 0.304 | 30.357 | 0.531 | 53.125 | 0.232 | 23.180 | 4.636 | 0.193 | 19.263 | 3.853 | 0.228  | 22.768  | 774.3 | --       | S Shore    | Intron 2/6  |      |  |
| chr3 | 69,723,137    | 4.27E-02 | 9.11E-02 | 0.304 | 30.357 | 0.531 | 53.125 | 0.232 | 23.180 | 4.636 | 0.193 | 19.263 | 3.853 | 0.228  | 22.768  | 774.3 | --       | S Shore    | Intron 2/5  | Nmd3 |  |
| chr3 | 69,723,137    | 4.27E-02 | 9.11E-02 | 0.304 | 30.357 | 0.531 | 53.125 | 0.232 | 23.180 | 4.636 | 0.193 | 19.263 | 3.853 | 0.228  | 22.768  | 774.3 | --       | S Shore    | Intron 2/2  | Nmd3 |  |
| chr3 | 69,723,137    | 4.27E-02 | 9.11E-02 | 0.304 | 30.357 | 0.531 | 53.125 | 0.232 | 23.180 | 4.636 | 0.193 | 19.263 | 3.853 | 0.228  | 22.768  | 774.3 | --       | S Shore    | TSS 5'00    | Nmd3 |  |
| chr3 | 69,723,257    | 2.19E-02 | 1.08E-01 | 0.317 | 31.707 | 0.608 | 60.784 | 0.267 | 26.697 | 5.339 | 0.207 | 20.684 | 4.137 | 0.291  | 29.077  | 774.3 | --       | S Shore    | Intron 2/15 |      |  |
| chr3 | 69,723,257    | 2.19E-02 | 1.08E-01 | 0.317 | 31.707 | 0.608 | 60.784 | 0.267 | 26.697 | 5.339 | 0.207 | 20.684 | 4.137 | 0.291  | 29.077  | 774.3 | --       | S Shore    | Intron 2/6  | Nmd3 |  |
| chr3 | 69,723,257    | 2.19E-02 | 1.08E-01 | 0.317 | 31.707 | 0.608 | 60.784 | 0.267 | 26.697 | 5.339 | 0.207 | 20.684 | 4.137 | 0.291  | 29.077  | 774.3 | --       | S Shore    | Intron 2/5  | Nmd3 |  |
| chr3 | 69,723,257    | 2.19E-02 | 1.08E-01 | 0.317 | 31.707 | 0.608 | 60.784 | 0.267 | 26.697 | 5.339 | 0.207 | 20.684 | 4.137 | 0.291  | 29.077  | 774.3 | --       | S Shore    | Intron 2/2  | Nmd3 |  |
| chr3 | 69,723,257    | 2.19E-02 | 1.08E-01 | 0.317 | 31.707 | 0.608 | 60.784 | 0.267 | 26.697 | 5.339 | 0.207 | 20.684 | 4.137 | 0.291  | 29.077  | 774.3 | --       | S Shore    | TSS 5'00    | Nmd3 |  |
| chr3 | 70,199,561    | 2.32E-02 | 9.91E-03 | 0.334 | 33.360 | 0.812 | 81.159 | 0.292 | 29.217 | 1.66  | 0.166 | 16.612 | 3.322 | 0.178  | 17.779  | 775.3 | AA       | Open Sea   | Intergenic  |      |  |
| chr3 | 70,199,721    | 9.76E-03 | 1.53E-03 | 0.220 | 21.951 | 0.517 | 51.724 | 0.158 | 15.819 | 3.384 | 0.058 | 5.811  | 1.162 | 0.174  | 11.449  | 775.3 | CT       | Open Sea   | Intergenic  |      |  |
| chr3 | 70,386,241    | 4.71E-02 | 3.22E-02 | 0.371 | 37.097 | 0.545 | 54.545 | 0.122 | 12.155 | 2.431 | 0.058 | 1.162  | 0.174 | 11.449 | 776.3   | --    | Open Sea | Intergenic |             |      |  |
| chr3 | 70,386,294    | 2.73E-02 | 2.90E-03 | 0.796 | 79.592 | 0.592 | 59.184 | 0.109 | 10.861 | 2.172 | 0.132 | 13.190 | 2.638 | -0.204 | -20.408 | 776.3 | --       | Open Sea   | Intergenic  |      |  |
| chr3 | 71,545,003    | 2.38E-03 | 2.38E-03 | 0.796 | 79.592 | 0.592 | 59.184 | 0.109 | 10.861 | 2.172 | 0.132 | 13.190 | 2.638 | -0.204 | -20.408 | 777.3 | --       | Open Sea   | Intergenic  |      |  |
| chr3 | 71,546,383    | 3.71E-02 | 2.65E-01 | 0.468 | 46.809 | 0.690 | 69.000 | 0.117 | 11.659 | 2.338 | 0.156 | 15.647 | 3.129 | 0.222  | 22.239  | 777.3 | --       | Open Sea   | Intergenic  |      |  |
| chr3 | 71,633,834    | 1.00E-02 | 1.00E-02 | 0.551 | 55.072 | 0.773 | 77.273 | 0.119 | 11.879 | 2.376 | 0.069 | 6.942  | 1.388 | 0.222  | 22.200  | 778.3 | --       | Open Sea   | Intergenic  |      |  |
| chr3 | 71,634,202    | 5.60E-03 | 2.49E-02 | 0.259 | 25.926 | 0.633 | 63.333 | 0.180 | 18.008 | 3.602 | 0.112 | 11.243 | 2.249 | 0.374  | 37.407  | 778.3 | --       | Open Sea   | Intergenic  |      |  |
| chr3 | 72,542,444    | 7.46E-03 | 7.46E-03 | 0.634 | 63.360 | 0.996 | 99.600 | 0.096 | 9.627  | 1.926 | 0.193 | 19.263 | 3.853 | 0.228  | 22.768  | 779.3 | --       | Open Sea   | Intergenic  |      |  |
| chr3 | 72,554,437    | 2.78E-02 | 7.46E-03 | 0.654 | 65.395 | 0.881 | 88.095 | 0.371 | 37.069 | 7.414 | 0.072 | 1.445  | 0.227 | 0.111  | 1.111   | 779.3 | --       | Open Sea   | Intergenic  |      |  |
| chr3 | 74,631,973    | 2.64E-02 | 2.64E-02 | 0.821 | 82.143 | 0.582 | 58.172 | 0.149 | 14.907 | 2.981 | 0.230 | 22.987 | 4.587 | -0.270 | -26.970 | 780.3 | --       | Open Sea   | Intergenic  |      |  |
| chr3 | 74,632,367    | 1.63E-02 | 1.63E-02 | 0.389 | 38.889 | 0.627 | 62.745 | 0.130 | 12.987 | 2.597 | 0.104 | 10.359 | 2.072 | 0.239  | 23.856  | 780.3 | --       | Open Sea   | Intergenic  |      |  |
| chr3 | 74,659,713    | 1.88E-03 | 1.88E-03 | 0.514 | 51.404 | 0.673 | 67.273 | 0.179 | 17.917 | 3.591 | 0.117 | 11.749 | 2.697 | 0.291  | 29.156  | 781.3 | --       | Open Sea   | Intergenic  |      |  |
| chr3 | 74,659,786    | 2.12E-02 | 1.88E-04 | 0.535 | 53.488 | 0.257 | 25.714 | 0.266 | 26.849 | 5.330 | 0.147 | 14.696 | 2.939 | -0.278 | -27.774 | 781.3 | --       | Open Sea   | Intergenic  |      |  |
| chr3 | 77,279,428    | 4.87E-02 | 1.65E-01 | 0.697 | 69.697 | 0.831 | 83.146 | 0.143 | 14.289 | 2.858 | 0.057 | 5.732  | 1.146 | 0.134  | 13.449  | 782.3 | cc       | Open Sea   | Intergenic  |      |  |
| chr3 | 77,280,227    | 2.69E-02 | 2.30E-01 | 0.754 | 75.410 | 0.571 | 57.143 | 0.098 | 9.832  | 1.966 | 0.070 | 7.034  | 1.407 | -0.183 | -18.287 | 782.3 | --       | Open Sea   | Intergenic  |      |  |
| chr3 | 77,352,623    | 2.35E-02 | 2.35E-02 | 0.388 | 38.800 | 0.299 | 29.897 | 0.138 | 13.837 | 0.96  | 0.096 | 0.967  | 0.161 | 0.161  | 1.61    | 783.3 | --       | Open Sea   | Intergenic  |      |  |
| chr3 | 77,352,714    | 2.24E-02 | 3.06E-03 | 0.333 | 33.333 | 0.590 | 59.574 | 0.096 | 9.645  | 1.929 | 0.161 | 16.071 | 3.214 | 0.256  | 25.641  | 783.3 | --       | Open Sea   | Intergenic  |      |  |
| chr3 | 77,623,987    | 2.32E-02 | 1.84E-02 | 0.778 | 77.778 | 0.910 | 91.026 | 0.106 | 10.568 | 2.114 | 0.057 | 5.676  | 1.135 | 0.132  | 13.248  | 784.3 | --       | Open Sea   | Intergenic  |      |  |
| chr3 | 77,624,423    | 4.63E-02 | 2.11E-01 | 0.853 | 85.321 | 0.742 | 74.227 | 0.088 | 8.811  | 1.762 | 0.080 | 7.958  | 1.592 | -0.111 | -11.094 | 784.3 | TC       | Open Sea   | Intergenic  |      |  |
| chr3 | 78,727,679    | 5.77E-03 | 5.77E-03 | 0.692 | 69.200 | 0.515 | 51.515 | 0.156 | 15.176 | 1.35  | 0.056 | 1.35   | 0.056 | 1.35   | 1.35    | 785.3 | --       | Open Sea   | Intergenic  |      |  |
| chr3 | 78,628,877    | 1.28E-02 | 1.65E-02 | 0.667 | 66.667 | 0.238 | 23.810 | 0.312 | 31.226 | 6.245 | 0.252 | 25.177 | 5.035 | -0.429 | -42.857 | 785.3 | --       | Open Sea   | Intergenic  |      |  |
| chr3 | 80,050,897    | 1.08E-02 | 2.10E-03 | 0.260 | 26.027 | 0.457 | 45.679 | 0.126 | 12.642 | 2.528 | 0.063 | 6.305  | 1.261 | 0.197  | 19.652  | 786.3 | AC       | Open Sea   | Intergenic  |      |  |
| chr3 | 80,050,897    | 7.93E-03 | 2.85E-02 | 0.429 | 42.857 | 0.600 | 60.000 | 0.070 | 7.019  | 1.404 | 0.051 | 5.144  | 1.029 | 0.171  | 17.143  | 786.3 | --       | Open Sea   | Intergenic  |      |  |
| chr3 | 87,186,367    | 5.50E-03 | 5.50E-03 | 0.711 | 71.143 | 0.783 | 78.333 | 0.196 | 19.605 | 0.994 | 0.171 | 17.143 | 1.971 | 0.107  | 10.708  | 787.3 | --       | Open Sea   | Intergenic  |      |  |
| chr3 | 87,186,637    | 4.43E-02 | 2.03E-01 | 0.458 | 45.833 | 0.676 | 67.568 | 0.121 | 12.051 | 2.410 | 0.149 | 14.926 | 2.985 | 0.217  | 21.734  | 787.3 | --       | Open Sea   | Intergenic  |      |  |
| chr3 | 94,224,372    | 1.75E-02 | 9.36E-03 | 0.458 | 45.833 | 0.778 | 77.778 | 0.241 | 24.084 | 4.817 | 0.213 | 21.331 | 4.266 | 0.319  | 31.944  | 788.3 | --       | Open Sea   | Intergenic  |      |  |
| chr3 | 94,224,492    | 3.41E-02 | 9.36E-03 | 0.621 | 62.069 | 0.846 | 84.615 | 0.193 | 19.257 | 3.651 | 0.087 | 8.654  | 1.731 | 0.225  | 22.546  | 788.3 | --       | Open Sea   | Intergenic  |      |  |
| chr3 | 95,113,933    | 1.75E-02 | 1.72E-01 | 0.621 | 62.069 | 0.846 | 84.615 | 0.193 | 19.257 | 3.651 | 0.087 | 8.654  | 1.731 | 0.225  | 22.546  | 788.3 | --       | Open Sea   | Intergenic  |      |  |
| chr3 | 95,113,933    | 3.37E-02 | 1.72E-01 | 0.621 | 62.069 | 0.846 | 84.615 | 0.193 | 19.257 | 3.651 | 0.087 | 8.654  | 1.731 | 0.225  | 22.546  | 788.3 | --       | Open Sea   | Intergenic  |      |  |
| chr3 | 95,113,933    | 2.57E-02 | 1.72E-01 | 0.621 | 62.069 | 0.846 | 84.615 | 0.193 | 19.257 | 3.651 | 0.087 | 8.654  | 1.731 | 0.225  | 22.546  | 788.3 | --       | Open Sea   | Intergenic  |      |  |
| chr3 | 95,113,933    | 2.57E-02 | 1.72E-01 | 0.621 | 62.069 | 0.846 | 84.615 | 0.193 | 19.257 | 3.651 | 0.087 | 8.654  | 1.731 | 0.225  | 22.546  | 788.3 | --       | Open Sea   | Intergenic  |      |  |
| chr3 | 95,113,933    | 2.57E-02 | 1.72E-01 | 0.621 | 62.069 | 0.846 | 84.615 | 0.193 | 19.257 | 3.651 | 0.087 | 8.654  | 1.731 | 0.225  | 22.546  | 788.3 | --       | Open Sea   | Intergenic  |      |  |
| chr3 | 96,093,780    | 1.63E-02 |          |       |        |       |        |       |        |       |       |        |       |        |         |       |          |            |             |      |  |



|      |             |          |          |       |        |       |        |       |        |       |       |        |       |        |         |       |                |          |            |
|------|-------------|----------|----------|-------|--------|-------|--------|-------|--------|-------|-------|--------|-------|--------|---------|-------|----------------|----------|------------|
| chr3 | 143,243,598 | 4.93E-02 | 1.59E-01 | 0.543 | 54.348 | 0.739 | 73.913 | 0.217 | 21.666 | 4.333 | 0.166 | 16.586 | 3.317 | 0.196  | 19.565  | 812.3 | AG             | Open Sea | Intergenic |
| chr3 | 143,243,609 | 1.70E-02 | 1.89E-01 | 0.556 | 55.556 | 0.787 | 78.723 | 0.219 | 21.902 | 4.380 | 0.134 | 13.404 | 2.681 | 0.232  | 23.168  | 812.3 | CA             | Open Sea | Intergenic |
| chr3 | 147,008,228 | 2.15E-02 | 2.64E-01 | 0.648 | 64.837 | 0.790 | 79.070 | 0.213 | 21.607 | 4.033 | 0.123 | 12.407 | 2.407 | 0.207  | 20.437  | 813.3 | --             | Open Sea | Intergenic |
| chr3 | 147,008,246 | 2.12E-02 | 4.94E-02 | 0.651 | 65.116 | 0.817 | 81.707 | 0.274 | 7.362  | 1.472 | 0.086 | 8.786  | 1.757 | 0.068  | 16.591  | 813.3 | --             | Open Sea | Intergenic |
| chr3 | 148,688,767 | 1.11E-02 | 3.70E-02 | 0.452 | 45.238 | 0.670 | 67.033 | 0.272 | 27.246 | 5.449 | 0.054 | 5.383  | 1.077 | 0.218  | 21.795  | 814.3 | TG             | Open Sea | Intergenic |
| chr3 | 148,688,801 | 1.76E-02 | 3.80E-02 | 0.410 | 40.984 | 0.644 | 64.384 | 0.287 | 28.735 | 5.747 | 0.144 | 14.378 | 2.876 | 0.234  | 23.400  | 814.3 | CT             | Open Sea | Intergenic |
| chr3 | 149,934,964 | 1.56E-02 | 8.13E-02 | 0.550 | 55.023 | 0.724 | 72.469 | 0.141 | 14.149 | 0.384 | 0.040 | 38.370 | 0.407 | 0.430  | 40.714  | 815.3 | TG             | Open Sea | Intergenic |
| chr3 | 149,934,980 | 5.80E-03 | 8.23E-02 | 0.261 | 26.087 | 0.682 | 68.182 | 0.153 | 15.283 | 3.057 | 0.142 | 41.245 | 8.249 | 0.421  | 42.095  | 815.3 | TG             | Open Sea | Intergenic |
| chr3 | 156,811,685 | 1.29E-02 | 3.29E-01 | 0.567 | 56.731 | 0.735 | 73.529 | 0.215 | 21.538 | 4.308 | 0.113 | 11.326 | 2.265 | 0.168  | 16.799  | 816.3 | --             | Open Sea | Intron 1/6 |
| chr3 | 156,811,768 | 3.14E-02 | 2.74E-02 | 0.136 | 13.636 | 0.267 | 26.687 | 0.079 | 7.921  | 1.584 | 0.086 | 6.565  | 1.713 | 0.130  | 13.030  | 816.3 | --             | Open Sea | Intron 1/6 |
| chr4 | 4,487,875   | 4.40T+05 | 4.94E-02 | 0.864 | 86.441 | 0.728 | 72.864 | 0.051 | 5.141  | 0.081 | 0.071 | 1.049  | 0.051 | 0.138  | 13.791  | 817.4 | AG             | Open Sea | Intergenic |
| chr4 | 4,488,560   | 1.33E-02 | 2.20E-01 | 0.869 | 86.869 | 0.736 | 73.554 | 0.069 | 6.912  | 1.382 | 0.114 | 11.397 | 2.279 | -0.133 | -13.315 | 817.4 | --             | Open Sea | Intergenic |
| chr4 | 5,155,747   | 4.75E-02 | 7.37E-04 | 0.871 | 87.143 | 0.716 | 71.642 | 0.097 | 9.657  | 1.931 | 0.149 | 14.919 | 2.984 | -0.155 | -15.501 | 818.4 | --             | Open Sea | Intergenic |
| chr4 | 5,155,826   | 1.88E-02 | 3.55E-03 | 0.680 | 68.000 | 0.852 | 85.246 | 0.173 | 17.283 | 3.457 | 0.072 | 7.211  | 1.442 | 0.172  | 17.246  | 818.4 | --             | Open Sea | Intergenic |
| chr4 | 5,155,834   | 1.41E-02 | 3.55E-03 | 0.712 | 71.233 | 0.895 | 89.474 | 0.144 | 14.435 | 1.02  | 0.125 | 10.205 | 2.041 | 0.182  | 18.241  | 818.4 | --             | Open Sea | Intergenic |
| chr4 | 5,690,865   | 4.77E-02 | 8.23E-03 | 0.293 | 29.310 | 0.543 | 54.286 | 0.383 | 38.255 | 7.651 | 0.219 | 21.866 | 4.373 | 0.250  | 24.975  | 819.4 | --             | Open Sea | Intron 1/2 |
| chr4 | 5,690,885   | 4.77E-02 | 8.23E-03 | 0.293 | 29.310 | 0.543 | 54.286 | 0.383 | 38.255 | 7.651 | 0.219 | 21.866 | 4.373 | 0.250  | 24.975  | 819.4 | --             | Open Sea | Intron 2/3 |
| chr4 | 5,690,885   | 4.77E-02 | 8.23E-03 | 0.293 | 29.310 | 0.543 | 54.286 | 0.383 | 38.255 | 7.651 | 0.219 | 21.866 | 4.373 | 0.250  | 24.975  | 819.4 | --             | Open Sea | Intron 2/3 |
| chr4 | 5,690,939   | 4.82E-02 | 3.15E-02 | 0.475 | 47.500 | 0.698 | 69.767 | 0.309 | 30.879 | 6.176 | 0.123 | 12.293 | 2.459 | 0.223  | 22.267  | 819.4 | --             | Open Sea | Intron 1/2 |
| chr4 | 5,690,939   | 4.82E-02 | 3.15E-02 | 0.475 | 47.500 | 0.698 | 69.767 | 0.309 | 30.879 | 6.176 | 0.123 | 12.293 | 2.459 | 0.223  | 22.267  | 819.4 | --             | Open Sea | Intron 2/3 |
| chr4 | 5,690,939   | 4.82E-02 | 3.15E-02 | 0.475 | 47.500 | 0.698 | 69.767 | 0.309 | 30.879 | 6.176 | 0.123 | 12.293 | 2.459 | 0.223  | 22.267  | 819.4 | --             | Open Sea | Intron 2/3 |
| chr4 | 8,715,342   | 3.76E-02 | 5.15E-03 | 0.759 | 75.926 | 0.880 | 88.000 | 0.129 | 12.866 | 2.573 | 0.066 | 6.609  | 1.322 | 0.121  | 12.074  | 820.4 | --             | Open Sea | Intergenic |
| chr4 | 8,729,149   | 7.73E-03 | 1.93E-01 | 0.808 | 80.769 | 0.544 | 54.386 | 0.131 | 13.122 | 2.624 | 0.178 | 17.806 | 3.561 | -0.264 | -26.383 | 821.4 | --             | S Shore  | Intergenic |
| chr4 | 9,729,156   | 1.02E-02 | 1.93E-01 | 0.783 | 78.261 | 0.532 | 53.191 | 0.119 | 11.899 | 2.380 | 0.189 | 18.920 | 3.784 | -0.251 | -25.069 | 821.4 | --             | S Shore  | Intergenic |
| chr4 | 14,395,407  | 2.71E-02 | 1.15E-02 | 0.483 | 48.276 | 0.769 | 76.923 | 0.257 | 25.693 | 0.250 | 0.500 | 5.000  | 0.250 | 0.500  | 5.000   | 822.4 | CA             | Open Sea | Intergenic |
| chr4 | 14,396,453  | 1.56E-02 | 1.15E-02 | 0.261 | 26.087 | 0.682 | 68.182 | 0.120 | 12.490 | 6.099 | 0.172 | 17.293 | 3.405 | 0.421  | 42.095  | 822.4 | CT             | Open Sea | Intergenic |
| chr4 | 14,885,740  | 3.02E-02 | 2.51E-02 | 0.625 | 62.500 | 0.885 | 88.462 | 0.245 | 24.506 | 6.901 | 0.081 | 8.070  | 1.614 | 0.260  | 25.962  | 823.4 | --             | Open Sea | Intron 1/6 |
| chr4 | 14,885,762  | 2.92E-02 | 2.51E-02 | 0.893 | 89.286 | 0.640 | 64.000 | 0.418 | 41.833 | 8.367 | 0.239 | 23.920 | 4.784 | -0.253 | -25.286 | 823.4 | --             | Open Sea | Intron 1/6 |
| chr4 | 16,638,257  | 4.63E-02 | 4.99E-03 | 0.635 | 63.528 | 0.473 | 47.535 | 0.151 | 15.045 | 2.875 | 0.051 | 5.051  | 1.737 | 0.197  | 19.735  | 824.4 | --             | Open Sea | Intergenic |
| chr4 | 16,638,434  | 4.83E-02 | 4.99E-03 | 0.871 | 87.097 | 0.719 | 71.930 | 0.110 | 11.043 | 2.209 | 0.148 | 14.803 | 2.961 | -0.152 | -15.167 | 824.4 | --             | Open Sea | Intergenic |
| chr4 | 17,702,732  | 3.05E-02 | 5.70E-02 | 0.535 | 53.488 | 0.760 | 76.000 | 0.129 | 12.859 | 2.572 | 0.150 | 15.049 | 3.010 | 0.225  | 22.512  | 825.4 | --             | Open Sea | Intergenic |
| chr4 | 17,703,438  | 1.65E-02 | 1.65E-02 | 0.444 | 44.444 | 0.774 | 77.419 | 0.196 | 19.644 | 3.929 | 0.188 | 18.764 | 3.753 | 0.330  | 32.975  | 825.4 | TG             | Open Sea | Intergenic |
| chr4 | 18,488,034  | 4.59E-02 | 4.59E-02 | 0.662 | 66.154 | 0.543 | 54.585 | 0.363 | 36.532 | 6.862 | 0.130 | 13.043 | 3.563 | 0.262  | 26.199  | 826.4 | --             | Open Sea | Intergenic |
| chr4 | 18,488,757  | 3.62E-02 | 1.54E-01 | 0.537 | 53.659 | 0.800 | 80.000 | 0.268 | 26.818 | 5.364 | 0.144 | 14.436 | 2.887 | 0.263  | 26.341  | 826.4 | --             | Open Sea | Intergenic |
| chr4 | 19,019,293  | 4.52E-02 | 7.67E-01 | 0.706 | 70.588 | 0.487 | 48.718 | 0.176 | 17.614 | 3.523 | 0.216 | 21.604 | 4.321 | -0.219 | -21.870 | 827.4 | TG             | Open Sea | Intergenic |
| chr4 | 19,019,803  | 6.20E-03 | 2.77E-01 | 0.611 | 61.111 | 0.903 | 90.323 | 0.184 | 18.406 | 3.681 | 0.206 | 20.591 | 4.118 | 0.292  | 29.211  | 827.4 | tg             | Open Sea | Intergenic |
| chr4 | 20,098,341  | 1.58E-02 | 3.52E-02 | 0.799 | 79.926 | 0.330 | 33.023 | 0.059 | 5.926  | 2.21  | 0.333 | 3.333  | 0.221 | 0.333  | 3.333   | 827.4 | Check manually | Open Sea | Intergenic |
| chr4 | 20,099,219  | 1.58E-02 | 2.51E-02 | 0.800 | 80.000 | 0.500 | 50.000 | 0.182 | 18.245 | 3.649 | 0.288 | 29.814 | 5.963 | -0.300 | -30.000 | 828.4 | --             | Open Sea | Intergenic |
| chr4 | 23,999,835  | 2.32E-02 | 1.46E-03 | 0.884 | 88.423 | 0.769 | 76.923 | 0.123 | 12.326 | 2.465 | 0.067 | 6.715  | 1.343 | -0.125 | -12.500 | 829.4 | --             | Open Sea | Intergenic |
| chr4 | 24,000,460  | 2.24E-02 | 4.51E-01 | 0.833 | 83.333 | 0.638 | 63.793 | 0.118 | 11.801 | 2.360 | 0.146 | 14.628 | 2.928 | -0.195 | -19.540 | 829.4 | --             | Open Sea | Intergenic |
| chr4 | 24,000,742  | 4.85E-02 | 2.42E-02 | 0.452 | 45.242 | 0.452 | 45.242 | 0.126 | 12.463 | 2.78  | 0.126 | 12.463 | 2.78  | 0.126  | 12.463  | 829.4 | TA             | Open Sea | Intergenic |
| chr4 | 28,535,787  | 1.23E-02 | 1.15E-01 | 0.419 | 41.935 | 0.660 | 66.587 | 0.132 | 13.173 | 2.635 | 0.202 | 20.151 | 4.030 | 0.240  | 24.022  | 830.4 | CC             | Open Sea | Intergenic |
| chr4 | 28,536,177  | 4.63E-02 | 2.53E-01 | 0.381 | 38.095 | 0.682 | 68.182 | 0.377 | 37.676 | 7.535 | 0.161 | 16.090 | 3.218 | 0.301  | 30.087  | 830.4 | AG             | Open Sea | Intergenic |
| chr4 | 29,589,751  | 3.58E-03 | 1.63E-02 | 0.529 | 52.941 | 0.800 | 80.000 | 0.144 | 14.351 | 2.870 | 0.070 | 7.037  | 1.407 | 0.271  | 27.059  | 831.4 | CG nearby      | Open Sea | Intergenic |
| chr4 | 29,589,774  | 1.19E-02 | 1.45E-02 | 0.644 | 64.444 | 0.769 | 76.923 | 0.179 | 17.865 | 3.122 | 0.123 | 12.372 | 2.434 | 0.119  | 11.919  | 831.4 | TA             | Open Sea | Intergenic |
| chr4 | 29,652,558  | 2.37E-03 | 2.38E-04 | 0.439 | 43.902 | 0.813 | 81.250 | 0.174 | 17.429 | 3.486 | 0.135 | 13.455 | 2.691 | 0.371  | 37.348  | 832.4 | --             | Open Sea | Intergenic |
| chr4 | 29,652,653  | 1.57E-02 | 1.00E-02 | 0.408 | 40.845 | 0.613 | 61.233 | 0.214 | 21.368 | 4.274 | 0.142 | 14.242 | 2.848 | 0.205  | 20.488  | 832.4 | --             | Open Sea | Intergenic |
| chr4 | 30,404,647  | 3.69E-02 | 7.75E-02 | 0.676 | 67.647 | 0.424 | 42.424 | 0.199 | 19.913 | 3.983 | 0.084 | 8.425  | 1.685 | -0.252 | -25.223 | 833.4 | --             | Open Sea | Intergenic |
| chr4 | 30,404,691  | 6.43E-03 | 7.75E-02 | 0.743 | 74.286 | 0.432 | 43.243 | 0.136 | 13.286 | 3.459 | 0.162 | 16.250 | 3.99  | -0.142 | -14.259 | 833.4 | --             | Open Sea | Intergenic |
| chr4 | 30,540,593  | 7.49E-03 | 7.49E-03 | 0.800 | 80.000 | 0.261 | 26.087 | 0.105 | 10.504 | 2.101 | 0.362 | 36.202 | 7.240 | -0.539 | -53.913 | 834.4 | CG nearby      | Open Sea | Intergenic |
| chr4 | 30,540,912  | 8.11E-03 | 8.11E-03 | 0.500 | 50.000 | 0.833 | 83.333 | 0.273 | 27.252 | 5.450 | 0.125 | 12.486 | 2.497 | 0.333  | 33.333  | 834.4 | --             | Open Sea | Intergenic |
| chr4 | 30,542,393  | 2.77E-02 | 7.05E-02 | 0.795 | 79.487 | 0.564 | 56.410 | 0.150 | 15.048 | 3.010 | 0.129 | 12.934 | 2.587 | -0.231 | -23.077 | 835.4 | --             | Open Sea | Intergenic |
| chr4 | 32,248,465  | 7.81E-02 | 7.05E-02 | 0.778 | 77.838 | 0.687 | 68.687 | 0.176 | 17.623 | 3.405 | 0.176 | 17.623 | 3.405 | 0.288  | 28.829  | 835.4 | --             | Open Sea | Intergenic |
| chr4 | 32,248,562  | 2.20E-02 | 3.87E-03 | 0.795 | 77.419 | 0.481 | 48.148 | 0.135 | 13.567 | 2.693 | 0.180 | 17.964 | 3.593 | -0.293 | -29.271 | 836.4 | CG nearby      | Open Sea | Intergenic |
| chr4 | 32,248,595  | 4.43E-02 | 3.87E-03 | 0.448 | 44.828 | 0.246 | 24.561 | 0.261 | 26.112 | 5.222 | 0.159 | 15.934 | 3.187 | -0.203 | -20.266 | 836.4 | -A             | Open Sea | Intergenic |
| chr4 | 32,248,606  | 3.68E-02 | 3.87E-03 | 0.493 | 49.315 | 0.324 | 32.432 | 0.230 | 23.023 | 4.605 | 0.084 | 8.405  | 1.681 | -0.169 | -16.883 | 836.4 | TG             | Open Sea | Intergenic |
| chr4 | 35,275,359  | 1.62E-02 | 1.63E-01 | 0.563 | 56.338 | 0.687 | 68.687 | 0.086 | 8.569  | 1.143 | 0.143 | 14.378 | 2.876 | 0.234  | 23.407  | 837.4 | --             | Open Sea | Intergenic |
| chr4 | 35,275,575  | 3.83E-02 | 4.05E-01 | 0.667 | 66.667 | 0.805 | 80.460 | 0.048 | 4.839  | 0.968 | 0.150 | 14.998 | 3.000 | 0.138  | 13.793  | 837.4 | --             | Open Sea | Intergenic |
| chr4 | 36,289,908  | 2.70E-02 | 8.59E-02 | 0.667 | 66.667 | 0.348 | 34.793 | 0.262 | 26.240 | 5.248 | 0.289 | 28.870 | 5.774 | -0.391 | -31.884 | 838.4 | --             | Open Sea | Intergenic |
| chr4 | 36,290,448  | 3.76E-02 | 3.61E-02 | 0.763 | 76.271 | 0.534 | 53.425 | 0.132 | 13.168 | 2.634 | 0.324 |        |       |        |         |       |                |          |            |



|      |             |          |          |       |        |        |        |        |        |       |       |        |        |        |         |        |                |                |            |            |
|------|-------------|----------|----------|-------|--------|--------|--------|--------|--------|-------|-------|--------|--------|--------|---------|--------|----------------|----------------|------------|------------|
| chr4 | 77,614,657  | 3.03E-02 | 3.00E-03 | 0.227 | 22.727 | 0.560  | 56.000 | 0.252  | 25.210 | 0.542 | 0.272 | 27.244 | 5.449  | 0.333  | 33.273  | 860.4  | CT             | Open Sea       | Intergenic |            |
| chr4 | 78,195,767  | 2.62E-02 | 1.37E-01 | 0.658 | 65.789 | 0.875  | 87.500 | 0.185  | 18.546 | 3.709 | 0.089 | 8.884  | 1.777  | 0.217  | 21.711  | 861.4  | --             | Open Sea       | Intergenic |            |
| chr4 | 78,195,831  | 6.15E-02 | 6.61E-03 | 0.615 | 61.538 | 0.830  | 83.000 | 0.139  | 13.925 | 2.073 | 0.079 | 7.926  | 1.460  | 0.214  | 21.440  | 862.4  | --             | Open Sea       | Intergenic |            |
| chr4 | 81,495,734  | 4.86E-02 | 1.89E-02 | 0.882 | 88.235 | 0.725  | 72.549 | 0.096  | 9.575  | 1.915 | 0.221 | 21.625 | 4.325  | -0.157 | -15.686 | 863.4  | --             | Open Sea       | Intergenic |            |
| chr4 | 81,495,867  | 4.10E-02 | 1.58E-02 | 0.667 | 66.667 | 0.796  | 79.630 | 0.046  | 4.615  | 0.923 | 0.087 | 8.683  | 1.737  | 0.130  | 12.963  | 862.4  | --             | Open Sea       | Intergenic |            |
| chr4 | 82,685,170  | 3.94E-02 | 5.75E-02 | 0.850 | 85.000 | 0.745  | 74.545 | 0.072  | 7.180  | 1.436 | 0.087 | 8.654  | 1.731  | -0.105 | -10.455 | 863.4  | --             | Open Sea       | Intergenic |            |
| chr4 | 82,685,198  | 5.70E-02 | 5.85E-02 | 0.866 | 86.617 | 0.852  | 85.617 | 0.052  | 5.250  | 0.999 | 0.084 | 8.507  | 1.700  | 0.221  | 22.107  | 863.4  | AA             | Open Sea       | Intergenic |            |
| chr4 | 89,087,291  | 4.81E-02 | 2.64E-02 | 0.840 | 84.000 | 0.611  | 61.111 | 0.205  | 20.497 | 0.099 | 0.224 | 21.382 | 4.276  | -0.229 | -22.889 | 864.4  | Check manually | Open Sea       | Intergenic |            |
| chr4 | 89,087,349  | 1.95E-02 | 2.51E-02 | 0.478 | 47.826 | 0.789  | 78.947 | 0.262  | 26.169 | 5.234 | 0.205 | 20.514 | 4.103  | 0.311  | 31.121  | 864.4  | --             | Open Sea       | Intergenic |            |
| chr4 | 90,314,942  | 2.01E-02 | 4.84E-02 | 0.692 | 69.231 | 0.900  | 90.000 | 0.170  | 16.979 | 3.396 | 0.085 | 8.526  | 1.705  | 0.208  | 20.769  | 865.4  | --             | Open Sea       | Intergenic |            |
| chr4 | 90,315,208  | 2.69E-02 | 8.35E-03 | 0.533 | 53.300 | 0.830  | 83.000 | 0.153  | 15.286 | 0.251 | 0.087 | 8.611  | 1.697  | 0.201  | 20.667  | 865.4  | --             | Open Sea       | Intergenic |            |
| chr4 | 91,942,301  | 3.94E-02 | 3.99E-03 | 0.889 | 88.889 | 0.754  | 75.362 | 0.120  | 12.004 | 2.401 | 0.057 | 5.743  | 1.149  | -0.135 | -13.527 | 866.4  | Check manually | Open Sea       | Intergenic |            |
| chr4 | 91,942,307  | 1.80E-02 | 3.99E-03 | 0.853 | 85.333 | 0.688  | 68.831 | 0.107  | 10.671 | 2.134 | 0.034 | 3.395  | 0.679  | -0.165 | -16.502 | 866.4  | --             | Open Sea       | Intergenic |            |
| chr4 | 93,945,706  | 2.00E-02 | 1.50E-03 | 0.886 | 88.636 | 0.682  | 68.162 | 0.093  | 9.319  | 1.864 | 0.174 | 17.485 | 3.487  | -0.205 | -20.455 | 867.4  | --             | Open Sea       | Intergenic |            |
| chr4 | 93,945,890  | 2.21E-02 | 2.09E-03 | 0.795 | 79.487 | 0.520  | 50.000 | 0.222  | 22.186 | 1.437 | 0.173 | 17.324 | 3.465  | -0.296 | -29.487 | 867.4  | -G             | Open Sea       | Intergenic |            |
| chr4 | 94,416,331  | 1.90E-02 | 3.30E-02 | 0.321 | 32.143 | 0.667  | 66.667 | 0.392  | 39.164 | 7.833 | 0.236 | 23.617 | 4.723  | 0.345  | 34.524  | 868.4  | TA             | Open Sea       | Intergenic |            |
| chr4 | 94,416,377  | 1.65E-02 | 3.00E-02 | 0.231 | 23.077 | 0.591  | 59.091 | 0.164  | 16.369 | 3.274 | 0.315 | 31.526 | 6.305  | 0.360  | 36.014  | 868.4  | TG             | Open Sea       | Intergenic |            |
| chr4 | 96,558,003  | 2.41E-02 | 7.07E-02 | 0.590 | 59.074 | 0.821  | 82.051 | 0.103  | 10.296 | 2.059 | 0.159 | 15.894 | 3.179  | 0.231  | 23.077  | 869.4  | --             | Open Sea       | Intergenic |            |
| chr4 | 96,558,540  | 4.64E-02 | 4.64E-02 | 0.696 | 69.643 | 0.850  | 85.000 | 0.207  | 20.731 | 1.146 | 0.090 | 8.973  | 1.795  | 0.154  | 15.357  | 869.4  | --             | Open Sea       | Intergenic |            |
| chr4 | 97,050,862  | 2.97E-02 | 2.32E-01 | 0.577 | 57.777 | 0.846  | 84.615 | 0.228  | 22.788 | 4.558 | 0.144 | 14.436 | 2.887  | 0.269  | 26.923  | 870.4  | TA             | Open Sea       | Intergenic |            |
| chr4 | 97,050,931  | 9.67E-03 | 2.32E-01 | 0.400 | 40.000 | 0.800  | 80.000 | 0.232  | 23.185 | 4.637 | 0.273 | 27.274 | 5.455  | 0.400  | 40.000  | 870.4  | AG             | Open Sea       | Intergenic |            |
| chr4 | 98,437,226  | 1.98E-04 | 0.613    | 0.120 | 0.483  | 48.276 | 0.207  | 20.737 | 3.304  | 1.417 | 0.304 | 30.351 | 6.070  | -0.330 | -32.974 | 871.4  | --             | Open Sea       | Intergenic |            |
| chr4 | 98,437,226  | 1.67E-02 | 1.98E-04 | 0.813 | 81.250 | 0.483  | 48.276 | 0.207  | 20.737 | 4.147 | 0.304 | 30.351 | 6.070  | -0.330 | -32.974 | 871.4  | --             | Open Sea       | Intergenic |            |
| chr4 | 98,437,247  | 1.77E-02 | 1.98E-04 | 0.750 | 75.000 | 0.429  | 42.857 | 0.169  | 16.851 | 3.370 | 0.211 | 21.076 | 4.215  | -0.321 | -32.143 | 871.4  | AG             | Open Sea       | Intergenic |            |
| chr4 | 98,437,247  | 1.77E-02 | 1.98E-04 | 0.750 | 75.000 | 0.429  | 42.857 | 0.169  | 16.851 | 3.370 | 0.211 | 21.076 | 4.215  | -0.321 | -32.143 | 871.4  | AG             | Open Sea       | Intergenic |            |
| chr4 | 99,005,158  | 8.01E-03 | 4.06E-04 | 0.340 | 34.000 | 0.628  | 62.791 | 0.167  | 16.715 | 1.84  | 0.343 | 3.434  | 18.401 | 3.680  | 0.288   | 28.791 | 872.4          | Check manually | Open Sea   | Intergenic |
| chr4 | 99,005,158  | 8.01E-03 | 4.06E-04 | 0.340 | 34.000 | 0.628  | 62.791 | 0.167  | 16.715 | 1.84  | 0.343 | 3.434  | 18.401 | 3.680  | 0.288   | 28.791 | 872.4          | Check manually | Open Sea   | Intergenic |
| chr4 | 99,005,158  | 8.01E-03 | 4.06E-04 | 0.340 | 34.000 | 0.628  | 62.791 | 0.167  | 16.715 | 1.84  | 0.343 | 3.434  | 18.401 | 3.680  | 0.288   | 28.791 | 872.4          | Check manually | Open Sea   | Intergenic |
| chr4 | 99,005,158  | 8.01E-03 | 4.06E-04 | 0.340 | 34.000 | 0.628  | 62.791 | 0.167  | 16.715 | 1.84  | 0.343 | 3.434  | 18.401 | 3.680  | 0.288   | 28.791 | 872.4          | Check manually | Open Sea   | Intergenic |
| chr4 | 99,005,194  | 1.33E-02 | 3.13E-04 | 0.290 | 29.032 | 0.519  | 51.923 | 0.200  | 20.005 | 4.001 | 0.032 | 3.169  | 0.634  | 0.229  | 22.891  | 872.4  | CT             | Open Sea       | Intergenic |            |
| chr4 | 99,005,194  | 3.13E-04 | 3.13E-04 | 0.290 | 29.032 | 0.519  | 51.923 | 0.200  | 20.005 | 4.001 | 0.032 | 3.169  | 0.634  | 0.229  | 22.891  | 872.4  | CT             | Open Sea       | Intergenic |            |
| chr4 | 99,005,194  | 1.33E-02 | 3.13E-04 | 0.290 | 29.032 | 0.519  | 51.923 | 0.200  | 20.005 | 4.001 | 0.032 | 3.169  | 0.634  | 0.229  | 22.891  | 872.4  | CT             | Open Sea       | Intergenic |            |
| chr4 | 104,302,715 | 1.62E-02 | 2.88E-03 | 0.551 | 55.102 | 0.782  | 78.182 | 0.138  | 13.824 | 2.765 | 0.189 | 18.898 | 3.780  | 0.231  | 23.080  | 873.4  | --             | Open Sea       | Intergenic |            |
| chr4 | 104,302,767 | 1.87E-02 | 2.88E-03 | 0.511 | 51.064 | 0.727  | 72.727 | 0.088  | 8.831  | 1.766 | 0.147 | 14.678 | 2.936  | 0.217  | 21.663  | 873.4  | --             | Open Sea       | Intergenic |            |
| chr4 | 104,303,051 | 4.29E-02 | 3.39E-02 | 0.615 | 61.533 | 0.821  | 82.103 | 0.229  | 22.945 | 1.116 | 0.239 | 23.945 | 2.329  | 0.160  | 16.040  | 873.4  | --             | Open Sea       | Intergenic |            |
| chr4 | 104,842,508 | 4.01E-02 | 5.56E-02 | 0.872 | 87.179 | 0.683  | 68.293 | 0.107  | 10.714 | 2.143 | 0.130 | 12.966 | 2.593  | -0.189 | -18.887 | 874.4  | Check manually | Open Sea       | Intergenic |            |
| chr4 | 104,842,616 | 1.15E-02 | 8.56E-02 | 0.500 | 50.000 | 0.773  | 77.273 | 0.272  | 27.176 | 5.435 | 0.126 | 12.610 | 2.522  | 0.273  | 27.273  | 874.4  | AA             | Open Sea       | Intergenic |            |
| chr4 | 105,718,115 | 4.79E-02 | 1.08E-01 | 0.320 | 32.000 | 0.609  | 60.870 | 0.336  | 33.564 | 6.713 | 0.311 | 31.060 | 6.212  | 0.289  | 28.870  | 875.4  | TA             | Open Sea       | Intergenic |            |
| chr4 | 105,718,439 | 9.05E-02 | 1.08E-01 | 0.320 | 32.000 | 0.609  | 60.870 | 0.336  | 33.564 | 6.713 | 0.311 | 31.060 | 6.212  | 0.289  | 28.870  | 875.4  | TA             | Open Sea       | Intergenic |            |
| chr4 | 106,289,157 | 4.01E-02 | 8.48E-03 | 0.451 | 45.098 | 0.617  | 61.728 | 0.122  | 12.172 | 2.434 | 0.103 | 10.260 | 2.052  | 0.166  | 16.630  | 876.4  | --             | Open Sea       | Intergenic |            |
| chr4 | 106,289,165 | 3.14E-02 | 8.48E-03 | 0.433 | 43.269 | 0.640  | 64.045 | 0.121  | 12.077 | 2.415 | 0.193 | 19.285 | 3.857  | 0.208  | 20.776  | 876.4  | --             | Open Sea       | Intergenic |            |
| chr4 | 107,586,370 | 1.58E-02 | 6.12E-02 | 0.542 | 54.167 | 0.839  | 83.871 | 0.277  | 27.750 | 5.550 | 0.117 | 11.660 | 2.332  | 0.297  | 29.704  | 877.4  | --             | Open Sea       | Intergenic |            |
| chr4 | 107,586,985 | 4.07E-02 | 4.02E-02 | 0.414 | 41.429 | 0.820  | 82.000 | 0.206  | 20.590 | 4.164 | 0.206 | 20.590 | 4.164  | 0.206  | 20.590  | 877.4  | --             | Open Sea       | Intergenic |            |
| chr4 | 110,284,431 | 9.50E-04 | 2.50E-04 | 0.222 | 22.222 | 0.703  | 70.270 | 0.389  | 38.879 | 7.776 | 0.197 | 19.711 | 3.942  | 0.480  | 48.048  | 878.4  | TG             | Open Sea       | Intergenic |            |
| chr4 | 110,284,431 | 9.50E-04 | 2.50E-04 | 0.222 | 22.222 | 0.703  | 70.270 | 0.389  | 38.879 | 7.776 | 0.197 | 19.711 | 3.942  | 0.480  | 48.048  | 878.4  | TG             | Open Sea       | Intergenic |            |
| chr4 | 110,284,431 | 9.50E-04 | 2.50E-04 | 0.222 | 22.222 | 0.703  | 70.270 | 0.389  | 38.879 | 7.776 | 0.197 | 19.711 | 3.942  | 0.480  | 48.048  | 878.4  | TG             | Open Sea       | Intergenic |            |
| chr4 | 110,284,431 | 9.50E-04 | 2.50E-04 | 0.222 | 22.222 | 0.703  | 70.270 | 0.389  | 38.879 | 7.776 | 0.197 | 19.711 | 3.942  | 0.480  | 48.048  | 878.4  | TG             | Open Sea       | Intergenic |            |
| chr4 | 110,284,431 | 9.50E-04 | 2.50E-04 | 0.222 | 22.222 | 0.703  | 70.270 | 0.389  | 38.879 | 7.776 | 0.197 | 19.711 | 3.942  | 0.480  | 48.048  | 878.4  | TG             | Open Sea       | Intergenic |            |
| chr4 | 110,285,087 | 3.92E-02 | 3.92E-02 | 0.125 | 12.500 | 0.316  | 31.579 | 0.100  | 10.000 | 2.000 | 0.179 | 17.879 | 3.576  | 0.191  | 19.079  | 878.4  | CG nearby      | Open Sea       | Intergenic |            |
| chr4 | 110,285,087 | 3.92E-02 | 3.92E-02 | 0.125 | 12.500 | 0.316  | 31.579 | 0.100  | 10.000 | 2.000 | 0.179 | 17.879 | 3.576  | 0.191  | 19.079  | 878.4  | CG nearby      | Open Sea       | Intergenic |            |
| chr4 | 110,285,087 | 3.92E-02 | 3.92E-02 | 0.125 | 12.500 | 0.316  | 31.579 | 0.100  | 10.000 | 2.000 | 0.179 | 17.879 | 3.576  | 0.191  | 19.079  | 878.4  | CG nearby      | Open Sea       | Intergenic |            |
| chr4 | 110,285,087 | 3.92E-02 | 3.92E-02 | 0.125 | 12.500 | 0.316  | 31.579 | 0.100  | 10.000 | 2.000 | 0.179 | 17.879 | 3.576  | 0.191  | 19.079  | 878.4  | CG nearby      | Open Sea       | Intergenic |            |
| chr4 | 110,285,087 | 3.92E-02 | 3.92E-02 | 0.125 | 12.500 | 0.316  | 31.579 | 0.100  | 10.000 | 2.000 | 0.179 | 17.879 | 3.576  | 0.191  | 19.079  | 878.4  | CG nearby      | Open Sea       | Intergenic |            |
| chr4 | 112,714,080 | 3.36E-02 | 6.67E-02 | 0.825 | 82.456 | 0.648  | 64.815 | 0.123  | 12.321 | 2.464 | 0.175 | 17.545 | 3.509  | -0.176 | -17.641 | 879.4  | --             | Open Sea       | Intergenic |            |
| chr4 | 112,714,482 | 8.46E-03 | 8.46E-03 | 0.740 | 74.000 | 0.429  | 42.857 | 0.189  | 18.890 | 3.778 | 0.172 | 17.233 | 3.447  | -0.311 | -31.143 | 879.4  | --             | Open Sea       | Intergenic |            |
| chr4 | 112,856,230 | 1.32E-02 | 4.67E-02 | 0.483 | 48.276 | 0.840  | 84.000 | 0.299  | 29.884 | 5.977 | 0.206 | 20.563 | 4.113  | 0.357  | 35.724  | 880.4  | --             | Open Sea       | Intergenic |            |
| chr4 | 112,856,589 | 1.25E-02 | 5.66E-02 | 0.588 | 58.757 | 0.820  | 82.000 | 0.299  | 29.884 | 5.977 | 0.206 | 20.563 | 4.113  | 0.357  | 35.724  | 880.4  | --             | Open Sea       | Intergenic |            |
| chr4 | 120,338,973 | 4.39E-04 | 8.56E-05 | 0.169 | 16.883 | 0.446  | 44.615 | 0.081  | 8.068  | 1.614 | 0.083 | 8.349  | 1.670  | 0.277  | 27.732  | 881.4  | --             | Open Sea       | Intergenic |            |
| chr4 | 120,338,978 | 6.28E-03 | 8.56E-05 | 0.167 | 16.667 | 0.393  | 39.344 | 0.111  | 11.145 | 2.229 | 0.107 | 10.730 | 2.146  | 0.227  | 22.678  | 881.4  | --             | Open Sea       | Intergenic |            |
| chr4 | 120,338,980 | 2.21E-02 | 8.56E-05 | 0.304 |        |        |        |        |        |       |       |        |        |        |         |        |                |                |            |            |



|      |            |          |           |       |        |       |        |       |        |        |       |        |        |        |         |        |                |          |            |            |
|------|------------|----------|-----------|-------|--------|-------|--------|-------|--------|--------|-------|--------|--------|--------|---------|--------|----------------|----------|------------|------------|
| chrs | 14,998,275 | 3.27E-02 | 8.63E-01  | 0.764 | 76.364 | 0.500 | 50.000 | 0.103 | 13.274 | 2.655  | 0.355 | 35.521 | 7.104  | -0.264 | -26.364 | 899.5  | --             | Open Sea | Intergenic |            |
| chrs | 14,998,300 | 2.85E-02 | 8.63E-01  | 0.543 | 54.348 | 0.286 | 28.571 | 0.256 | 25.559 | 5.112  | 0.192 | 19.185 | 3.837  | -0.258 | -25.776 | 899.5  | --             | Open Sea | Intergenic |            |
| chrs | 15,043,597 | 2.45E-03 | 8.68E-01  | 0.339 | 68.863 | 0.512 | 68.863 | 0.339 | 68.863 | 0.177  | 0.094 | 1.677  | 8.363  | -0.177 | -17.668 | 900.5  | --             | Open Sea | Intergenic |            |
| chrs | 15,043,938 | 3.74E-03 | 5.01E-01  | 0.521 | 52.083 | 0.704 | 70.370 | 0.267 | 26.744 | 5.349  | 0.118 | 11.841 | 2.368  | 0.118  | 18.287  | 900.5  | --             | Open Sea | Intergenic |            |
| chrs | 15,514,219 | 2.59E-02 | 2.21E-01  | 0.630 | 63.043 | 0.825 | 82.456 | 0.298 | 29.790 | 5.958  | 0.125 | 12.530 | 2.506  | 0.194  | 19.413  | 901.5  | --             | Open Sea | Intergenic |            |
| chrs | 15,514,700 | 1.77E-02 | 2.89E-01  | 0.511 | 51.136 | 0.707 | 70.680 | 0.132 | 13.180 | 2.636  | 0.133 | 13.348 | 2.670  | 0.196  | 19.553  | 901.5  | --             | Open Sea | Intergenic |            |
| chrs | 15,547,766 | 7.80E-02 | 0.69E-01  | 0.684 | 69.657 | 0.684 | 69.657 | 0.123 | 12.305 | 6.764  | 0.068 | 6.764  | 0.123  | 0.173  | 17.312  | 902.5  | --             | Open Sea | Intergenic |            |
| chrs | 15,548,654 | 4.14E-02 | 6.75E-02  | 0.471 | 47.059 | 0.750 | 75.000 | 0.282 | 28.219 | 5.644  | 0.235 | 23.534 | 4.707  | 0.279  | 27.941  | 902.5  | --             | Open Sea | Intergenic |            |
| chrs | 16,782,884 | 1.65E-02 | 1.65E-02  | 0.600 | 60.000 | 0.820 | 82.000 | 0.182 | 18.215 | 3.643  | 0.228 | 22.754 | 4.551  | 0.220  | 22.000  | 903.5  | CA             | Open Sea | Intergenic |            |
| chrs | 16,783,029 | 4.69E-02 | 5.42E-02  | 0.400 | 40.000 | 0.679 | 67.857 | 0.300 | 30.030 | 6.006  | 0.287 | 28.725 | 5.745  | 0.279  | 27.857  | 903.5  | CC             | Open Sea | Intergenic |            |
| chrs | 21,156,758 | 2.17E-02 | 1.00E-03  | 0.114 | 21.146 | 0.214 | 21.146 | 0.100 | 10.032 | 0.302  | 0.130 | 1.302  | 0.302  | 0.334  | 33.410  | 904.5  | --             | Open Sea | Intergenic |            |
| chrs | 21,156,783 | 7.34E-04 | 5.06E-04  | 0.156 | 15.625 | 0.613 | 61.280 | 0.082 | 8.249  | 1.650  | 0.220 | 20.219 | 4.044  | 0.457  | 45.665  | 904.5  | --             | Open Sea | Intergenic |            |
| chrs | 26,971,679 | 8.41E-03 | 7.91E-03  | 0.429 | 42.857 | 0.783 | 78.261 | 0.252 | 25.157 | 5.031  | 0.187 | 18.702 | 3.740  | 0.354  | 35.404  | 905.5  | ta             | Open Sea | Intergenic |            |
| chrs | 26,971,700 | 4.32E-02 | 1.31E-02  | 0.424 | 42.424 | 0.750 | 75.000 | 0.252 | 25.165 | 5.033  | 0.283 | 28.349 | 5.670  | 0.326  | 32.576  | 905.5  | -a             | Open Sea | Intergenic |            |
| chrs | 30,510,419 | 3.80E-02 | 2.13E-01  | 0.179 | 30.511 | 0.681 | 68.085 | 0.204 | 20.440 | 4.088  | 0.126 | 12.679 | 2.916  | -0.191 | -19.084 | 906.5  | --             | Open Sea | Intergenic |            |
| chrs | 30,511,083 | 4.32E-02 | 5.30E-01  | 0.400 | 40.000 | 0.625 | 62.500 | 0.280 | 28.002 | 5.600  | 0.229 | 22.850 | 4.570  | 0.225  | 22.500  | 906.5  | --             | Open Sea | Intergenic |            |
| chrs | 36,694,711 | 4.93E-03 | 2.04E-01  | 0.148 | 14.815 | 0.524 | 52.381 | 0.141 | 14.147 | 2.829  | 0.126 | 12.605 | 2.521  | 0.376  | 37.566  | 907.5  | --             | N Shore  | Intron 1/8 |            |
| chrs | 36,694,711 | 4.93E-03 | 2.04E-01  | 0.148 | 14.815 | 0.524 | 52.381 | 0.141 | 14.147 | 2.829  | 0.126 | 12.605 | 2.521  | 0.376  | 37.566  | 907.5  | --             | N Shore  | Intron 1/1 |            |
| chrs | 36,694,713 | 4.93E-03 | 2.04E-01  | 0.148 | 14.815 | 0.524 | 52.381 | 0.141 | 14.147 | 2.829  | 0.126 | 12.605 | 2.521  | 0.376  | 37.566  | 907.5  | --             | N Shore  | Intron 1/8 |            |
| chrs | 36,694,713 | 3.29E-03 | 2.04E-01  | 0.185 | 18.519 | 0.591 | 59.091 | 0.159 | 15.947 | 3.189  | 0.217 | 21.679 | 4.336  | 0.406  | 40.572  | 907.5  | --             | N Shore  | Intron 1/1 |            |
| chrs | 41,879,730 | 3.35E-02 | 2.74E-04  | 0.500 | 50.000 | 0.778 | 77.778 | 0.258 | 25.821 | 5.164  | 0.212 | 21.189 | 4.238  | 0.278  | 27.778  | 908.5  | --             | Open Sea | Intergenic |            |
| chrs | 41,879,815 | 4.76E-02 | 5.50E-04  | 0.733 | 73.342 | 0.899 | 89.889 | 0.136 | 13.825 | 2.765  | 0.079 | 7.869  | 1.574  | 0.135  | 13.546  | 908.5  | --             | Open Sea | Intergenic |            |
| chrs | 41,879,867 | 2.35E-02 | 6.07E-04  | 0.608 | 60.811 | 0.797 | 79.730 | 0.112 | 11.555 | 2.231  | 0.113 | 11.324 | 2.265  | 0.189  | 18.919  | 908.5  | --             | Open Sea | Intergenic |            |
| chrs | 42,989,559 | 6.16E-03 | 1.70E-03  | 0.207 | 20.690 | 0.739 | 73.913 | 0.178 | 17.799 | 3.560  | 0.274 | 27.386 | 5.477  | 0.532  | 53.223  | 909.5  | ag             | Open Sea | Intergenic |            |
| chrs | 42,989,589 | 1.83E-02 | 7.22E-04  | 0.276 | 27.586 | 0.643 | 64.286 | 0.224 | 22.438 | 4.488  | 0.247 | 24.714 | 4.943  | 0.367  | 36.700  | 909.5  | ca             | Open Sea | Intergenic |            |
| chrs | 47,363,718 | 3.59E-02 | 3.55E-03  | 0.822 | 82.203 | 0.709 | 70.866 | 0.106 | 10.817 | 1.39   | 0.163 | 1.39   | 13.854 | 2.771  | -0.133  | 13.727 | 910.5          | --       | Open Sea   | Intergenic |
| chrs | 47,363,800 | 2.11E-02 | 3.55E-03  | 0.868 | 86.823 | 0.618 | 61.818 | 0.386 | 38.517 | 5.703  | 0.196 | 19.598 | 3.920  | 0.222  | 22.196  | 910.5  | C-             | Open Sea | Intergenic |            |
| chrs | 47,404,804 | 2.70E-02 | 4.55E-03  | 0.667 | 66.667 | 0.846 | 84.615 | 0.030 | 3.048  | 0.610  | 0.158 | 1.576  | 3.151  | 0.179  | 17.949  | 911.5  | --             | Open Sea | Intergenic |            |
| chrs | 47,404,835 | 3.35E-02 | 4.55E-03  | 0.696 | 69.643 | 0.857 | 85.714 | 0.047 | 4.676  | 0.935  | 0.097 | 9.679  | 1.936  | 0.161  | 16.071  | 911.5  | --             | Open Sea | Intergenic |            |
| chrs | 51,899,525 | 1.06E-02 | 5.89E-05  | 0.349 | 51.899 | 0.603 | 60.345 | 0.346 | 34.923 | 2.08   | 0.154 | 1.54   | 19.524 | 0.154  | 19.524  | 912.5  | --             | Open Sea | Intergenic |            |
| chrs | 51,899,530 | 1.65E-02 | 5.89E-01  | 0.323 | 32.258 | 0.638 | 63.793 | 0.083 | 36.295 | 7.659  | 0.307 | 30.747 | 6.149  | 0.315  | 31.535  | 912.5  | CG nearby      | Open Sea | Intergenic |            |
| chrs | 55,586,064 | 1.16E-02 | 9.83E-02  | 0.852 | 85.185 | 0.538 | 53.846 | 0.089 | 8.893  | 1.779  | 0.251 | 25.115 | 5.023  | -0.313 | -31.339 | 913.5  | --             | Open Sea | Intergenic |            |
| chrs | 55,586,855 | 3.64E-02 | 1.32E-01  | 0.491 | 49.091 | 0.696 | 69.585 | 0.248 | 24.842 | 4.968  | 0.098 | 9.755  | 1.951  | 0.205  | 20.474  | 913.5  | --             | Open Sea | Intergenic |            |
| chrs | 56,002,432 | 3.18E-02 | 3.72E-03  | 0.816 | 81.579 | 0.591 | 59.159 | 0.351 | 35.219 | 7.859  | 0.178 | 17.849 | 3.570  | -0.235 | -23.514 | 914.5  | --             | Open Sea | Intergenic |            |
| chrs | 56,002,495 | 2.47E-02 | 3.72E-03  | 0.854 | 82.353 | 0.650 | 65.000 | 0.101 | 10.116 | 2.023  | 0.091 | 9.068  | 1.814  | -0.174 | -17.353 | 914.5  | --             | Open Sea | Intergenic |            |
| chrs | 56,005,575 | 1.16E-02 | 8.10E-03  | 0.867 | 86.667 | 0.634 | 63.415 | 0.115 | 11.467 | 2.293  | 0.118 | 11.825 | 2.365  | -0.233 | -23.252 | 915.5  | TA             | Open Sea | Intergenic |            |
| chrs | 56,005,683 | 1.52E-02 | 8.10E-03  | 0.583 | 58.333 | 0.848 | 84.848 | 0.194 | 19.361 | 3.872  | 0.114 | 11.426 | 2.285  | 0.265  | 26.515  | 915.5  | --             | Open Sea | Intergenic |            |
| chrs | 56,275,387 | 4.61E-02 | 0.12E-02  | 0.768 | 76.848 | 0.136 | 13.648 | 0.169 | 16.492 | 2.366  | 0.141 | 14.161 | 2.366  | 0.141  | 14.161  | 916.5  | TT             | Open Sea | Intergenic |            |
| chrs | 56,275,520 | 2.75E-02 | 33.33E-03 | 0.532 | 53.226 | 0.205 | 20.462 | 0.092 | 9.176  | 17.615 | 0.353 | 19.992 | 3.523  | 0.199  | 19.892  | 916.5  | TG             | Open Sea | Intergenic |            |
| chrs | 57,308,696 | 4.91E-02 | 6.14E-03  | 0.619 | 61.905 | 0.500 | 50.000 | 0.046 | 4.594  | 0.919  | 0.069 | 6.901  | 1.380  | -0.119 | -11.905 | 917.5  | gc             | Open Sea | Intergenic |            |
| chrs | 57,308,850 | 2.83E-02 | 6.14E-03  | 0.650 | 65.027 | 0.757 | 75.681 | 0.073 | 7.349  | 1.470  | 0.069 | 6.868  | 1.374  | 0.106  | 10.634  | 917.5  | --             | Open Sea | Intergenic |            |
| chrs | 59,546,739 | 8.78E-02 | 0.51E-03  | 0.253 | 25.283 | 0.759 | 75.903 | 0.141 | 14.163 | 2.336  | 0.141 | 14.163 | 2.336  | 0.141  | 14.163  | 918.5  | --             | Open Sea | Intergenic |            |
| chrs | 59,547,345 | 1.37E-02 | 1.37E-02  | 0.714 | 71.429 | 0.346 | 34.615 | 0.372 | 37.240 | 7.448  | 0.235 | 23.585 | 4.717  | -0.368 | -36.813 | 918.5  | --             | Open Sea | Intergenic |            |
| chrs | 61,164,091 | 1.88E-02 | 9.70E-03  | 0.357 | 35.714 | 0.647 | 64.706 | 0.176 | 17.587 | 3.517  | 0.263 | 25.326 | 5.065  | 0.290  | 28.992  | 919.5  | Check manually | Open Sea | Intergenic |            |
| chrs | 61,164,223 | 4.29E-02 | 2.66E-02  | 0.273 | 27.273 | 0.527 | 52.727 | 0.355 | 35.485 | 7.097  | 0.315 | 31.543 | 6.309  | 0.255  | 25.455  | 919.5  | Check manually | Open Sea | Intergenic |            |
| chrs | 62,886,997 | 3.18E-02 | 3.18E-02  | 0.462 | 46.154 | 0.462 | 46.154 | 0.199 | 19.911 | 1.19   | 0.122 | 1.19   | 12.229 | 0.122  | 12.229  | 920.5  | --             | Open Sea | Intergenic |            |
| chrs | 62,887,194 | 4.75E-02 | 7.91E-03  | 0.767 | 76.667 | 0.529 | 52.941 | 0.359 | 35.855 | 7.171  | 0.231 | 23.116 | 4.623  | -0.237 | -23.725 | 920.5  | AG             | Open Sea | Intergenic |            |
| chrs | 63,240,861 | 1.73E-03 | 4.16E-02  | 0.838 | 83.803 | 0.650 | 65.041 | 0.078 | 7.777  | 1.555  | 0.076 | 7.607  | 1.521  | -0.188 | -18.762 | 921.5  | --             | Open Sea | Intergenic |            |
| chrs | 63,241,656 | 4.86E-02 | 6.30E-02  | 0.900 | 90.000 | 0.700 | 70.000 | 0.423 | 42.265 | 8.453  | 0.124 | 12.383 | 2.477  | -0.200 | -20.000 | 921.5  | TA             | Open Sea | Intergenic |            |
| chrs | 63,275,767 | 2.37E-02 | 2.01E-01  | 0.365 | 36.500 | 0.452 | 45.151 | 0.395 | 39.922 | 7.084  | 0.193 | 19.326 | 3.865  | 0.265  | 26.500  | 922.5  | --             | Open Sea | Intergenic |            |
| chrs | 63,276,268 | 3.81E-02 | 3.81E-02  | 0.415 | 41.463 | 0.650 | 65.000 | 0.154 | 15.354 | 3.071  | 0.325 | 32.468 | 6.694  | 0.235  | 23.537  | 922.5  | --             | Open Sea | Intergenic |            |
| chrs | 64,959,314 | 2.12E-02 | 5.73E-03  | 0.724 | 72.414 | 0.400 | 40.000 | 0.385 | 38.531 | 7.706  | 0.283 | 28.322 | 5.664  | -0.324 | -32.414 | 923.5  | TA             | Open Sea | Intergenic |            |
| chrs | 64,959,327 | 4.90E-02 | 1.80E-02  | 0.800 | 80.000 | 0.476 | 47.619 | 0.400 | 40.116 | 8.023  | 0.328 | 32.796 | 6.559  | -0.324 | -32.381 | 923.5  | AC             | Open Sea | Intergenic |            |
| chrs | 65,889,613 | 8.03E-03 | 8.03E-03  | 0.750 | 75.000 | 0.452 | 45.151 | 0.395 | 39.922 | 7.084  | 0.193 | 19.326 | 3.865  | 0.265  | 26.500  | 924.5  | TA             | Open Sea | Intergenic |            |
| chrs | 65,889,719 | 4.36E-03 | 1.20E-02  | 0.613 | 61.290 | 0.258 | 25.806 | 0.216 | 21.625 | 4.325  | 0.145 | 14.476 | 2.895  | -0.355 | -35.484 | 924.5  | --             | Open Sea | Intergenic |            |
| chrs | 67,621,851 | 4.80E-02 | 6.78E-02  | 0.884 | 88.372 | 0.703 | 70.270 | 0.084 | 8.367  | 1.673  | 0.217 | 21.731 | 4.346  | -0.181 | -18.102 | 925.5  | CG nearby      | Open Sea | Intergenic |            |
| chrs | 67,621,851 | 4.80E-02 | 6.78E-02  | 0.884 | 88.372 | 0.703 | 70.270 | 0.084 | 8.367  | 1.673  | 0.217 | 21.731 | 4.346  | -0.181 | -18.102 | 925.5  | CG nearby      | Open Sea | Intergenic |            |
| chrs | 67,621,886 | 3.35E-02 | 4.76E-02  | 0.833 | 83.333 | 0.618 | 61.765 | 0.117 | 11.682 | 2.336  | 0.139 | 13.916 | 2.783  | -0.216 | -21.569 | 925.5  | CG nearby      | Open Sea | Intergenic |            |
| chrs | 68,733,439 | 5.16E-03 | 1.18E-05  | 0.179 | 17.857 | 0.439 | 43.860 | 0.083 | 8.315  | 1.663  | 0.148 | 14.848 | 2.970  | 0.260  | 26.003  | 926.5  | TA             | Open Sea | Intergenic |            |
| chrs | 68,733,607 | 1.79E-02 | 2.18E-05  | 0.222 | 22.222 | 0.542 | 54.167 | 0.230 | 16.771 | 3.354  | 0.16  |        |        |        |         |        |                |          |            |            |



|      |             |          |          |       |        |       |        |       |        |        |       |        |       |        |         |       |                |          |             |        |
|------|-------------|----------|----------|-------|--------|-------|--------|-------|--------|--------|-------|--------|-------|--------|---------|-------|----------------|----------|-------------|--------|
| chrs | 105,769,466 | 4.86E-03 | 2.40E-04 | 0.277 | 27.660 | 0.660 | 65.957 | 0.135 | 21.308 | 4.262  | 0.177 | 17.685 | 3.537 | 0.383  | 38.298  | 945.5 | --             | Open Sea | Intron 2/2  | Lnc8d  |
| chrs | 105,769,466 | 4.86E-03 | 2.40E-04 | 0.277 | 27.660 | 0.660 | 65.957 | 0.213 | 21.308 | 4.262  | 0.177 | 17.685 | 3.537 | 0.383  | 38.298  | 945.5 | --             | Open Sea | Intron 2/2  | Lnc8d  |
| chrs | 105,769,466 | 2.40E-03 | 2.40E-04 | 0.277 | 27.660 | 0.660 | 65.957 | 0.213 | 21.308 | 4.262  | 0.177 | 17.685 | 3.537 | 0.383  | 38.298  | 945.5 | --             | Open Sea | Intron 2/2  | Lnc8d  |
| chrs | 109,133,480 | 2.70E-02 | 4.60E-03 | 0.564 | 56.364 | 0.762 | 78.182 | 0.160 | 16.029 | 3.206  | 0.114 | 11.364 | 2.273 | 0.218  | 21.818  | 946.5 | --             | Open Sea | Intergenic  |        |
| chrs | 109,133,555 | 1.71E-02 | 4.60E-03 | 0.522 | 52.174 | 0.828 | 82.759 | 0.239 | 23.939 | 4.788  | 0.128 | 12.790 | 2.558 | 0.306  | 30.585  | 946.5 | --             | Open Sea | Intergenic  |        |
| chrs | 111,058,572 | 6.81E-03 | 3.84E-03 | 0.872 | 87.179 | 0.513 | 51.282 | 0.105 | 10.527 | 2.105  | 0.280 | 27.892 | 5.598 | -0.359 | -38.897 | 947.5 | TG             | Open Sea | Intron 2/22 | Tlc28  |
| chrs | 111,058,579 | 2.72E-02 | 4.76E-03 | 0.865 | 86.496 | 0.650 | 65.950 | 0.267 | 26.600 | 10.364 | 0.104 | 10.364 | 2.811 | -0.077 | -21.486 | 947.5 | --             | Open Sea | Intron 2/22 | Tlc28  |
| chrs | 113,900,330 | 3.27E-02 | 3.13E-02 | 0.900 | 90.000 | 0.771 | 77.143 | 0.079 | 7.897  | 1.579  | 0.087 | 8.746  | 1.749 | -0.129 | -12.857 | 948.5 | --             | Open Sea | Intron 1/10 | Coro1c |
| chrs | 113,900,433 | 3.16E-02 | 4.63E-03 | 0.873 | 87.255 | 0.755 | 75.510 | 0.076 | 7.625  | 1.525  | 0.070 | 7.047  | 1.409 | -0.117 | -11.745 | 948.5 | --             | Open Sea | Intron 1/10 | Coro1c |
| chrs | 116,774,800 | 1.01E-02 | 7.54E-02 | 0.367 | 36.667 | 0.737 | 73.684 | 0.311 | 31.112 | 6.222  | 0.164 | 16.431 | 3.286 | 0.370  | 37.018  | 949.5 | --             | Open Sea | Intergenic  |        |
| chrs | 116,775,722 | 3.42E-02 | 3.42E-02 | 0.636 | 63.729 | 0.636 | 63.729 | 0.202 | 20.240 | 4.048  | 0.163 | 16.306 | 3.261 | 0.215  | 21.470  | 949.5 | --             | Open Sea | Intergenic  |        |
| chrs | 123,461,732 | 4.07E-02 | 5.92E-03 | 0.359 | 35.938 | 0.574 | 57.407 | 0.202 | 20.240 | 4.048  | 0.163 | 16.306 | 3.261 | 0.215  | 21.470  | 950.5 | AC             | Open Sea | Intergenic  |        |
| chrs | 123,461,752 | 1.83E-03 | 5.92E-03 | 0.294 | 29.412 | 0.544 | 54.412 | 0.087 | 8.722  | 1.744  | 0.219 | 21.949 | 4.390 | 0.250  | 25.000  | 950.5 | CG nearby      | Open Sea | Intergenic  |        |
| chrs | 123,461,861 | 3.01E-02 | 6.07E-03 | 0.369 | 36.916 | 0.486 | 48.624 | 0.165 | 16.456 | 3.291  | 0.059 | 5.906  | 1.181 | 0.117  | 11.708  | 950.5 | --             | Open Sea | Intergenic  |        |
| chrs | 127,158,105 | 3.58E-02 | 3.29E-02 | 0.682 | 68.246 | 0.807 | 80.672 | 0.122 | 12.200 | 2.440  | 0.131 | 13.063 | 2.811 | 0.174  | 17.424  | 951.5 | TA             | Open Sea | Intergenic  |        |
| chrs | 127,158,109 | 4.48E-02 | 3.29E-02 | 0.687 | 68.696 | 0.802 | 80.172 | 0.144 | 14.352 | 2.870  | 0.111 | 11.108 | 2.222 | 0.115  | 11.477  | 951.5 | Check manually | Open Sea | Intergenic  |        |
| chrs | 127,741,575 | 2.35E-02 | 1.64E-01 | 0.364 | 36.364 | 0.632 | 63.156 | 0.182 | 18.164 | 3.633  | 0.211 | 21.118 | 4.224 | 0.288  | 28.794  | 952.5 | --             | Open Sea | Intergenic  |        |
| chrs | 127,742,071 | 3.00E-02 | 2.00E-01 | 0.648 | 64.754 | 0.776 | 77.612 | 0.183 | 18.257 | 3.651  | 0.099 | 9.887  | 1.977 | 0.129  | 12.858  | 952.5 | --             | Open Sea | Intergenic  |        |
| chrs | 128,621,291 | 2.30E-02 | 6.98E-07 | 0.172 | 17.241 | 0.386 | 38.750 | 0.093 | 9.253  | 1.851  | 0.184 | 18.445 | 3.689 | 0.215  | 21.509  | 953.5 | --             | Open Sea | Intergenic  |        |
| chrs | 128,621,419 | 1.18E-02 | 5.36E-05 | 0.190 | 19.048 | 0.591 | 59.091 | 0.135 | 13.458 | 2.692  | 0.285 | 28.529 | 5.706 | 0.400  | 40.043  | 953.5 | --             | Open Sea | Intergenic  |        |
| chrs | 132,130,679 | 3.61E-02 | 7.54E-01 | 0.280 | 28.000 | 0.583 | 58.333 | 0.229 | 22.854 | 4.571  | 0.247 | 24.676 | 4.935 | 0.303  | 30.333  | 954.5 | TA             | Open Sea | Intron 2/18 | Aut2s  |
| chrs | 132,130,832 | 2.80E-02 | 4.75E-02 | 0.669 | 66.792 | 0.677 | 67.668 | 0.077 | 7.668  | 1.534  | 0.181 | 18.077 | 3.615 | -0.245 | -24.455 | 954.5 | TA             | Open Sea | Intergenic  | Aut2s  |
| chrs | 133,856,377 | 2.54E-02 | 1.46E-03 | 0.130 | 13.043 | 0.417 | 41.667 | 0.052 | 5.170  | 1.834  | 0.217 | 21.660 | 4.332 | 0.286  | 28.623  | 955.5 | Check manually | Open Sea | Intergenic  |        |
| chrs | 133,856,448 | 1.37E-02 | 5.72E-04 | 0.333 | 33.333 | 0.592 | 59.184 | 0.152 | 15.210 | 3.042  | 0.184 | 18.372 | 3.674 | 0.259  | 25.850  | 955.5 | TG             | S Shelf  | Intergenic  |        |
| chrs | 134,974,581 | 2.44E-03 | 1.88E-01 | 0.194 | 19.355 | 0.600 | 60.000 | 0.190 | 19.965 | 3.793  | 0.261 | 26.087 | 5.217 | 0.406  | 40.645  | 956.5 | --             | Open Sea | Intergenic  |        |
| chrs | 134,975,496 | 4.87E-02 | 5.46E-03 | 0.828 | 82.759 | 0.536 | 53.571 | 0.135 | 13.491 | 2.698  | 0.361 | 36.580 | 7.216 | 0.292  | 29.187  | 956.5 | --             | Open Sea | Intergenic  |        |
| chrs | 135,093,323 | 2.08E-02 | 1.16E-02 | 0.614 | 61.404 | 0.464 | 46.377 | 0.174 | 17.450 | 1.22   | 0.480 | 4.800  | 1.216 | -0.150 | -15.027 | 957.5 | --             | S Shelf  | Intergenic  |        |
| chrs | 135,093,302 | 4.27E-02 | 5.28E-01 | 0.650 | 64.964 | 0.514 | 51.351 | 0.093 | 9.313  | 1.863  | 0.128 | 12.829 | 2.566 | -0.167 | -13.612 | 957.5 | --             | S Shelf  | Intergenic  |        |
| chrs | 145,594,497 | 2.32E-02 | 1.27E-02 | 0.547 | 54.676 | 0.411 | 41.135 | 0.120 | 11.977 | 2.395  | 0.133 | 13.270 | 2.654 | -0.135 | -13.542 | 958.5 | GG             | Open Sea | Intergenic  |        |
| chrs | 145,594,529 | 3.45E-02 | 9.21E-02 | 0.367 | 36.712 | 0.507 | 50.705 | 0.221 | 22.109 | 3.705  | 0.289 | 28.907 | 5.397 | 0.166  | 16.610  | 959.5 | CG             | Open Sea | Intergenic  |        |
| chrs | 147,723,810 | 4.52E-03 | 3.81E-02 | 0.250 | 25.000 | 0.583 | 58.333 | 0.221 | 22.066 | 4.413  | 0.276 | 27.606 | 5.521 | 0.333  | 33.333  | 959.5 | --             | N Shore  | Intron 1/29 | Flt1   |
| chrs | 147,723,810 | 4.52E-03 | 3.81E-02 | 0.250 | 25.000 | 0.583 | 58.333 | 0.221 | 22.066 | 4.413  | 0.276 | 27.606 | 5.521 | 0.333  | 33.333  | 959.5 | --             | N Shore  | Intron 1/12 | Flt1   |
| chrs | 147,723,815 | 3.80E-02 | 3.81E-02 | 0.174 | 17.391 | 0.417 | 41.667 | 0.141 | 14.093 | 2.819  | 0.374 | 37.371 | 7.474 | 0.243  | 24.275  | 959.5 | --             | N Shore  | Intron 1/29 | Flt1   |
| chrs | 147,723,815 | 3.80E-02 | 3.81E-02 | 0.174 | 17.391 | 0.417 | 41.667 | 0.141 | 14.093 | 2.819  | 0.374 | 37.371 | 7.474 | 0.243  | 24.275  | 959.5 | --             | N Shore  | Intron 1/12 | Flt1   |
| chrs | 148,756,583 | 2.13E-02 | 6.71E-02 | 0.708 | 70.769 | 0.873 | 87.324 | 0.207 | 20.668 | 4.134  | 0.072 | 7.237  | 1.447 | 0.166  | 16.555  | 960.5 | --             | Open Sea | Intergenic  |        |
| chrs | 148,755,690 | 5.16E-03 | 1.15E-03 | 0.404 | 40.426 | 0.712 | 71.154 | 0.107 | 10.739 | 2.148  | 0.117 | 11.710 | 2.342 | 0.307  | 30.728  | 960.5 | --             | Open Sea | Intergenic  |        |
| chrs | 149,015,379 | 2.01E-02 | 1.66E-02 | 0.472 | 47.170 | 0.255 | 25.455 | 0.268 | 26.811 | 5.362  | 0.161 | 16.061 | 3.212 | -0.217 | -21.715 | 961.5 | gt             | Open Sea | Intergenic  |        |
| chrs | 149,015,412 | 9.70E-02 | 4.02E-04 | 0.069 | 6.920  | 0.303 | 30.303 | 0.143 | 14.282 | 2.143  | 0.145 | 14.589 | 2.856 | -0.200 | -20.000 | 962.5 | CG             | Open Sea | Intergenic  |        |
| chrs | 4.647,457   | 5.76E-03 | 1.83E-03 | 0.349 | 34.884 | 0.683 | 68.293 | 0.214 | 21.420 | 4.284  | 0.190 | 19.011 | 3.802 | 0.334  | 33.409  | 962.5 | --             | Open Sea | Intergenic  |        |
| chrs | 4.647,854   | 4.45E-02 | 8.36E-02 | 0.564 | 56.364 | 0.692 | 69.231 | 0.087 | 8.682  | 1.736  | 0.046 | 4.576  | 0.915 | 0.129  | 12.867  | 962.6 | --             | Open Sea | Intergenic  |        |
| chrs | 7.596,283   | 4.99E-02 | 2.75E-01 | 0.844 | 84.444 | 0.725 | 72.527 | 0.078 | 7.846  | 1.569  | 0.130 | 13.003 | 2.601 | -0.119 | -11.917 | 962.6 | Check manually | Open Sea | Intergenic  |        |
| chrs | 7.597,276   | 1.09E-02 | 5.01E-01 | 0.515 | 51.509 | 0.569 | 56.923 | 0.153 | 15.309 | 2.463  | 0.153 | 15.309 | 2.463 | 0.153  | 15.309  | 962.6 | AG             | Open Sea | Intergenic  |        |
| chrs | 7.852,504   | 1.36E-02 | 7.04E-03 | 0.380 | 38.028 | 0.603 | 60.317 | 0.082 | 8.177  | 1.635  | 0.214 | 21.402 | 4.280 | 0.223  | 22.289  | 964.6 | ta             | Open Sea | Intron 1/3  | C1ga1t |
| chrs | 7.852,511   | 2.06E-02 | 7.04E-03 | 0.275 | 27.536 | 0.470 | 46.970 | 0.124 | 12.432 | 2.486  | 0.263 | 2.598  | 5.260 | 0.194  | 19.433  | 964.6 | --             | Open Sea | Intron 1/3  | C1ga1t |
| chrs | 9.840,021   | 2.20E-02 | 2.20E-02 | 0.761 | 76.106 | 0.556 | 55.556 | 0.122 | 12.177 | 2.435  | 0.107 | 10.688 | 2.140 | -0.205 | -20.501 | 965.6 | AA             | Open Sea | Intergenic  |        |
| chrs | 9.840,253   | 1.38E-02 | 1.38E-01 | 0.761 | 76.106 | 0.711 | 71.084 | 0.191 | 19.083 | 1.494  | 0.103 | 10.361 | 2.507 | -0.131 | -13.062 | 965.6 | TA             | Open Sea | Intergenic  |        |
| chrs | 9.846,068   | 4.46E-02 | 2.71E-01 | 0.585 | 58.522 | 0.371 | 37.097 | 0.288 | 28.800 | 5.760  | 0.071 | 7.094  | 1.419 | -0.189 | -18.425 | 966.6 | --             | Open Sea | Intergenic  |        |
| chrs | 9.854,340   | 3.12E-02 | 7.01E-02 | 0.761 | 76.106 | 0.875 | 87.500 | 0.117 | 11.654 | 2.331  | 0.086 | 8.563  | 1.713 | 0.114  | 11.394  | 966.6 | --             | Open Sea | Intergenic  |        |
| chrs | 9.929,088   | 4.70E-02 | 4.51E-03 | 0.500 | 50.000 | 0.655 | 65.546 | 0.087 | 8.715  | 1.743  | 0.153 | 15.344 | 3.069 | 0.155  | 15.546  | 967.6 | --             | Open Sea | Intergenic  |        |
| chrs | 9.929,229   | 3.68E-02 | 5.83E-02 | 0.641 | 64.448 | 0.691 | 69.088 | 0.191 | 19.083 | 3.816  | 0.130 | 13.083 | 2.507 | -0.131 | -13.062 | 967.6 | Check manually | Open Sea | Intergenic  |        |
| chrs | 10.883,886  | 4.91E-02 | 5.77E-03 | 0.632 | 63.158 | 0.760 | 75.962 | 0.177 | 17.691 | 3.538  | 0.036 | 3.579  | 0.716 | 0.122  | 12.804  | 968.6 | CA             | Open Sea | Intergenic  |        |
| chrs | 10.884,068  | 1.60E-02 | 3.80E-03 | 0.760 | 76.042 | 0.605 | 60.504 | 0.113 | 11.330 | 2.266  | 0.124 | 12.429 | 2.486 | -0.155 | -15.537 | 968.6 | Check manually | Open Sea | Intergenic  |        |
| chrs | 11.020,991  | 2.19E-02 | 2.47E-02 | 0.840 | 84.000 | 0.563 | 56.250 | 0.130 | 12.996 | 2.599  | 0.105 | 10.468 | 2.094 | -0.278 | -27.750 | 969.6 | --             | Open Sea | Intergenic  |        |
| chrs | 11.021,013  | 3.15E-02 | 0.83E-03 | 0.833 | 83.333 | 0.373 | 37.273 | 0.152 | 15.255 | 2.455  | 0.160 | 16.005 | 2.321 | -0.286 | -28.605 | 969.6 | --             | Open Sea | Intergenic  |        |
| chrs | 11.164,205  | 3.94E-02 | 9.49E-02 | 0.722 | 72.222 | 0.444 | 44.444 | 0.247 | 24.717 | 4.943  | 0.259 | 25.921 | 5.184 | -0.278 | -27.778 | 970.6 | --             | Open Sea | Intergenic  |        |
| chrs | 11.164,282  | 2.23E-01 | 0.51E-02 | 0.516 | 51.613 | 0.757 | 75.676 | 0.245 | 24.465 | 4.893  | 0.185 | 18.485 | 3.697 | 0.241  | 24.063  | 970.6 | --             | Open Sea | Intergenic  |        |
| chrs | 12.390,211  | 2.72E-02 | 1.18E-01 | 0.577 | 57.692 | 0.828 | 82.759 | 0.354 | 33.417 | 6.683  | 0.097 | 9.726  | 1.945 | 0.251  | 25.066  | 971.6 | TC             | Open Sea | Intergenic  |        |
| chrs | 12.390,418  | 1.33E-02 | 0.44E-01 | 0.641 | 64.068 | 0.672 | 67.168 | 0.257 | 25.640 | 5.340  | 0.240 | 24.640 | 4.231 | 0.231  | 23.121  | 971.6 | CA             | Open Sea | Intergenic  |        |



|      |             |          |          |       |        |       |        |       |        |          |       |        |       |        |         |        |    |            |              |                |
|------|-------------|----------|----------|-------|--------|-------|--------|-------|--------|----------|-------|--------|-------|--------|---------|--------|----|------------|--------------|----------------|
| chr6 | 61,653,107  | 4.86E-02 | 2.39E-02 | 0.605 | 60.465 | 0.390 | 39.024 | 0.223 | 22.325 | 4.465    | 0.199 | 19.912 | 3.962 | -0.214 | -21.441 | 992.6  | TA | Open Sea   | Intron 2/4   | Ccser1         |
| chr6 | 64,997,276  | 3.01E-03 | 8.47E-01 | 0.357 | 35.714 | 0.767 | 76.687 | 0.181 | 18.110 | 3.622    | 0.169 | 16.851 | 3.370 | 0.410  | 40.952  | 993.6  | CA | Open Sea   | Intergenic   |                |
| chr6 | 64,997,301  | 8.47E-01 | 8.47E-01 | 0.357 | 35.714 | 0.767 | 76.687 | 0.181 | 18.110 | 3.622    | 0.169 | 16.851 | 3.370 | 0.410  | 40.952  | 993.6  | TT | Open Sea   | Intergenic   |                |
| chr6 | 69,072,361  | 1.86E-02 | 2.67E-02 | 0.704 | 70.730 | 0.385 | 38.462 | 0.157 | 15.658 | 3.132    | 0.202 | 20.194 | 4.039 | -0.019 | -31.909 | 994.6  | TT | Open Sea   | Intergenic   |                |
| chr6 | 69,072,412  | 3.54E-02 | 2.67E-02 | 0.464 | 46.429 | 0.767 | 76.687 | 0.283 | 28.284 | 5.657    | 0.217 | 21.750 | 4.350 | 0.302  | 30.238  | 994.6  | -- | Open Sea   | Intergenic   |                |
| chr6 | 74,366,821  | 2.80E-02 | 4.48E-02 | 0.696 | 69.643 | 0.862 | 86.154 | 0.170 | 17.002 | 3.400    | 0.069 | 6.944  | 1.389 | 0.165  | 16.511  | 995.6  | -- | S Shelf    | Intergenic   |                |
| chr6 | 74,366,897  | 1.58E-02 | 0.93E-02 | 0.379 | 37.943 | 0.667 | 66.667 | 0.137 | 13.791 | 6.713    | 0.281 | 28.085 | 1.343 | 0.281  | 28.736  | 995.6  | -- | Open Sea   | Intergenic   |                |
| chr6 | 74,393,997  | 3.71E-02 | 9.93E-02 | 0.404 | 40.367 | 0.562 | 56.190 | 0.067 | 6.676  | 1.335    | 0.165 | 16.537 | 3.307 | 0.158  | 15.824  | 996.6  | TA | Open Sea   | Intergenic   |                |
| chr6 | 74,394,052  | 3.57E-02 | 6.09E-03 | 0.388 | 38.835 | 0.555 | 55.455 | 0.123 | 12.344 | 2.469    | 0.126 | 12.587 | 2.517 | 0.166  | 16.620  | 996.6  | TA | Open Sea   | Intergenic   |                |
| chr6 | 74,591,597  | 3.53E-02 | 1.29E-04 | 0.114 | 11.429 | 0.333 | 33.333 | 0.164 | 16.413 | 3.293    | 0.280 | 28.003 | 5.601 | 0.219  | 21.905  | 997.6  | -- | Open Sea   | Intergenic   |                |
| chr6 | 74,592,424  | 2.27E-02 | 0.60E-02 | 0.887 | 88.707 | 0.887 | 88.707 | 0.600 | 60.000 | 2.27E-02 | 0.600 | 6.000  | 2.297 | 0.777  | 26.667  | 997.6  | -- | Open Sea   | Intergenic   |                |
| chr6 | 74,714,151  | 3.90E-02 | 2.48E-02 | 0.871 | 87.097 | 0.755 | 75.510 | 0.068 | 6.753  | 1.351    | 0.107 | 10.729 | 2.146 | -0.116 | -11.587 | 998.6  | -- | Open Sea   | Intergenic   |                |
| chr6 | 74,714,357  | 4.19E-02 | 4.19E-02 | 0.843 | 84.314 | 0.678 | 67.797 | 0.109 | 10.937 | 2.187    | 0.060 | 5.974  | 1.195 | -0.165 | -16.517 | 998.6  | -- | Open Sea   | Intergenic   |                |
| chr6 | 75,703,824  | 6.92E-03 | 4.10E-03 | 0.259 | 25.926 | 0.568 | 56.757 | 0.356 | 35.591 | 7.118    | 0.201 | 20.116 | 4.023 | 0.308  | 30.831  | 999.6  | -- | Open Sea   | Intergenic   |                |
| chr6 | 75,704,296  | 2.96E-02 | 2.96E-02 | 0.224 | 22.581 | 0.486 | 48.649 | 0.169 | 16.868 | 3.374    | 0.224 | 22.460 | 4.480 | 0.281  | 28.068  | 999.6  | -- | Open Sea   | Intergenic   |                |
| chr6 | 76,262,243  | 4.28E-02 | 1.58E-02 | 0.333 | 33.333 | 0.571 | 57.143 | 0.146 | 14.554 | 2.911    | 0.217 | 21.731 | 4.346 | 0.238  | 23.810  | 1000.6 | -- | Open Sea   | Intergenic   |                |
| chr6 | 76,262,342  | 3.29E-02 | 1.58E-02 | 0.438 | 43.750 | 0.673 | 67.308 | 0.315 | 31.476 | 6.295    | 0.084 | 6.373  | 1.675 | 0.236  | 23.558  | 1000.6 | -- | Open Sea   | Intergenic   |                |
| chr6 | 76,481,514  | 3.02E-02 | 1.87E-01 | 0.484 | 48.367 | 0.219 | 21.875 | 0.280 | 27.975 | 5.595    | 0.176 | 17.625 | 3.525 | -0.265 | -26.512 | 1001.6 | TT | Open Sea   | Intergenic   |                |
| chr6 | 76,482,561  | 4.81E-02 | 1.74E-01 | 0.625 | 62.500 | 0.806 | 80.645 | 0.071 | 7.097  | 1.419    | 0.185 | 18.509 | 3.002 | 0.181  | 18.145  | 1001.6 | di | Open Sea   | Intergenic   |                |
| chr6 | 81,384,444  | 1.13E-02 | 1.13E-02 | 0.565 | 56.522 | 0.893 | 89.286 | 0.242 | 24.224 | 4.845    | 0.106 | 10.595 | 2.119 | 0.328  | 32.764  | 1002.6 | -- | Open Sea   | Intergenic   |                |
| chr6 | 81,384,809  | 4.04E-02 | 4.04E-02 | 0.850 | 85.000 | 0.577 | 57.692 | 0.423 | 42.265 | 8.453    | 0.055 | 5.477  | 1.095 | -0.273 | -27.308 | 1002.6 | -- | Open Sea   | Intergenic   |                |
| chr6 | 82,993,119  | 2.07E-02 | 6.56E-01 | 0.816 | 81.633 | 0.614 | 61.404 | 0.094 | 9.372  | 1.874    | 0.218 | 21.806 | 4.361 | -0.202 | -20.229 | 1003.6 | -- | Open Sea   | Intergenic   |                |
| chr6 | 92,856,253  | 2.03E-02 | 6.05E-03 | 0.273 | 27.273 | 0.556 | 55.556 | 0.170 | 16.976 | 3.395    | 0.143 | 14.294 | 2.859 | 0.238  | 23.823  | 1004.6 | -- | Open Sea   | Intron 26/39 | Adams9         |
| chr6 | 92,856,450  | 3.61E-02 | 1.43E-04 | 0.581 | 58.065 | 0.818 | 81.818 | 0.273 | 27.309 | 5.462    | 0.189 | 18.944 | 3.789 | 0.283  | 23.754  | 1004.6 | TG | Open Sea   | Intron 26/39 | Adams9         |
| chr6 | 100,467,123 | 2.78E-02 | 6.48E-03 | 0.821 | 82.090 | 0.622 | 62.319 | 0.114 | 11.408 | 1.522    | 0.252 | 15.172 | 3.058 | -0.198 | -19.771 | 1005.6 | -- | CG Island  | Intergenic   |                |
| chr6 | 100,467,157 | 3.06E-02 | 6.48E-03 | 0.874 | 89.744 | 0.703 | 70.270 | 0.053 | 5.325  | 0.189    | 0.359 | 18.929 | 3.786 | 0.281  | 28.054  | 1005.6 | -- | CG Island  | Intergenic   |                |
| chr6 | 102,785,226 | 3.68E-02 | 2.35E-01 | 0.559 | 55.882 | 0.316 | 31.579 | 0.192 | 19.185 | 3.837    | 0.193 | 19.292 | 3.358 | -0.243 | -24.303 | 1006.6 | -- | Open Sea   | Intergenic   |                |
| chr6 | 102,785,298 | 4.23E-02 | 2.35E-01 | 0.600 | 60.000 | 0.344 | 34.375 | 0.206 | 20.585 | 4.117    | 0.094 | 9.380  | 1.876 | -0.256 | -25.625 | 1006.6 | -- | Open Sea   | Intergenic   |                |
| chr6 | 104,125,797 | 3.66E-02 | 3.26E-02 | 0.623 | 62.319 | 0.643 | 64.266 | 0.354 | 35.426 | 7.095    | 0.229 | 22.919 | 4.062 | -0.198 | -19.771 | 1007.6 | -- | Open Sea   | Intergenic   |                |
| chr6 | 104,125,847 | 4.72E-02 | 3.26E-02 | 0.731 | 73.077 | 0.535 | 53.488 | 0.139 | 13.946 | 2.789    | 0.276 | 27.621 | 5.524 | -0.196 | -19.589 | 1007.6 | -- | Open Sea   | Intergenic   |                |
| chr6 | 104,126,378 | 2.69E-02 | 3.04E-01 | 0.318 | 31.818 | 0.446 | 44.578 | 0.316 | 31.617 | 6.323    | 0.146 | 14.620 | 2.924 | 0.328  | 32.760  | 1007.6 | TT | Open Sea   | Intergenic   |                |
| chr6 | 104,342,995 | 4.73E-02 | 4.73E-02 | 0.714 | 71.429 | 0.409 | 40.909 | 0.458 | 45.795 | 9.159    | 0.084 | 8.368  | 1.674 | -0.105 | -10.519 | 1008.6 | CT | Open Sea   | Intergenic   |                |
| chr6 | 104,343,285 | 3.05E-02 | 3.85E-02 | 0.623 | 62.319 | 0.731 | 73.099 | 0.105 | 10.535 | 1.027    | 0.176 | 17.341 | 3.058 | 0.108  | 10.754  | 1008.6 | -- | Open Sea   | Intergenic   |                |
| chr6 | 104,431,718 | 2.24E-02 | 1.19E-01 | 0.345 | 34.483 | 0.650 | 65.000 | 0.221 | 22.212 | 0.244    | 0.220 | 22.016 | 4.403 | 0.305  | 30.517  | 1009.6 | TC | Open Sea   | Intergenic   |                |
| chr6 | 104,431,957 | 3.67E-02 | 8.27E-02 | 0.642 | 64.198 | 0.851 | 82.143 | 0.169 | 16.918 | 3.384    | 0.191 | 19.084 | 3.817 | 0.179  | 17.945  | 1009.6 | at | Open Sea   | Intergenic   |                |
| chr6 | 104,702,927 | 4.90E-02 | 5.92E-02 | 0.716 | 71.622 | 0.861 | 86.111 | 0.066 | 6.599  | 3.320    | 0.078 | 7.789  | 1.558 | 0.145  | 14.489  | 1010.6 | -- | Open Sea   | Intergenic   |                |
| chr6 | 104,703,070 | 3.20E-02 | 0.66E-01 | 0.311 | 31.090 | 0.471 | 47.122 | 0.122 | 12.235 | 2.447    | 0.369 | 36.929 | 7.396 | -0.384 | -38.416 | 1010.6 | -- | Open Sea   | Intergenic   |                |
| chr6 | 109,964,361 | 1.62E-03 | 2.02E-03 | 0.436 | 43.636 | 0.762 | 76.190 | 0.067 | 6.700  | 1.340    | 0.066 | 6.599  | 1.320 | 0.236  | 32.554  | 1011.6 | CC | Open Sea   | Intergenic   |                |
| chr6 | 109,964,361 | 3.05E-02 | 2.02E-03 | 0.716 | 71.642 | 0.517 | 51.724 | 0.198 | 19.789 | 3.958    | 0.107 | 10.678 | 2.136 | -0.199 | -19.918 | 1011.6 | -- | Open Sea   | Intergenic   |                |
| chr6 | 110,731,650 | 2.78E-02 | 2.30E-03 | 0.500 | 50.000 | 0.699 | 69.880 | 0.175 | 17.501 | 3.500    | 0.149 | 14.903 | 2.981 | 0.199  | 19.880  | 1012.6 | -- | Open Sea   | Intergenic   | Check manually |
| chr6 | 110,731,657 | 4.90E-02 | 2.30E-03 | 0.500 | 50.000 | 0.645 | 64.500 | 0.121 | 12.121 | 1.024    | 0.147 | 14.669 | 2.984 | 0.234  | 23.404  | 1012.6 | -- | Open Sea   | Intergenic   | Check manually |
| chr6 | 117,054,133 | 4.86E-02 | 5.40E-02 | 0.772 | 77.174 | 0.926 | 92.632 | 0.128 | 12.836 | 2.567    | 0.132 | 13.247 | 2.649 | 0.155  | 15.458  | 1013.6 | -- | Open Sea   | Intergenic   |                |
| chr6 | 117,054,233 | 3.63E-02 | 5.22E-02 | 0.871 | 87.143 | 0.724 | 72.414 | 0.085 | 8.466  | 1.693    | 0.104 | 10.365 | 2.073 | -0.147 | -14.729 | 1013.6 | -- | Open Sea   | Intergenic   |                |
| chr6 | 118,935,970 | 2.95E-02 | 7.53E-07 | 0.353 | 35.294 | 0.580 | 58.000 | 0.141 | 14.079 | 2.816    | 0.224 | 22.369 | 4.474 | 0.227  | 22.706  | 1014.6 | AG | Open Sea   | Intron 3/46  | Cacna1c        |
| chr6 | 118,935,970 | 2.95E-02 | 7.53E-07 | 0.353 | 35.294 | 0.580 | 58.000 | 0.141 | 14.079 | 2.816    | 0.224 | 22.369 | 4.474 | 0.227  | 22.706  | 1014.6 | AG | Open Sea   | Intron 3/47  | Cacna1c        |
| chr6 | 118,936,149 | 1.90E-02 | 1.90E-02 | 0.159 | 15.909 | 0.381 | 38.095 | 0.403 | 40.326 | 8.065    | 0.101 | 10.095 | 2.019 | 0.222  | 22.186  | 1014.6 | CG | Open Sea   | Intron 3/46  | Cacna1c        |
| chr6 | 118,936,149 | 1.90E-02 | 1.97E-06 | 0.159 | 15.909 | 0.381 | 38.095 | 0.403 | 40.326 | 8.065    | 0.101 | 10.095 | 2.019 | 0.222  | 22.186  | 1014.6 | CG | Open Sea   | Intron 3/47  | Cacna1c        |
| chr6 | 120,121,652 | 3.92E-02 | 2.03E-02 | 0.671 | 67.123 | 0.812 | 81.188 | 0.179 | 17.935 | 3.587    | 0.150 | 14.952 | 2.990 | 0.141  | 14.085  | 1015.6 | -- | Open Sea   | Intergenic   |                |
| chr6 | 120,122,388 | 4.78E-02 | 1.81E-01 | 0.645 | 64.516 | 0.889 | 88.989 | 0.229 | 22.940 | 4.589    | 0.420 | 41.989 | 8.398 | 0.644  | 64.373  | 1015.6 | -- | Open Sea   | Intergenic   |                |
| chr6 | 121,606,264 | 7.82E-03 | 6.97E-04 | 0.370 | 37.037 | 0.731 | 73.077 | 0.245 | 24.498 | 4.900    | 0.193 | 19.334 | 3.867 | 0.380  | 38.040  | 1016.6 | -- | Open Sea   | Intergenic   |                |
| chr6 | 121,606,290 | 1.35E-02 | 6.97E-04 | 0.406 | 40.625 | 0.706 | 70.588 | 0.218 | 21.833 | 4.367    | 0.123 | 12.271 | 2.454 | 0.300  | 29.963  | 1016.6 | -- | Open Sea   | Intergenic   |                |
| chr6 | 122,219,405 | 3.14E-02 | 3.75E-02 | 0.568 | 56.816 | 0.806 | 80.556 | 0.280 | 27.999 | 5.600    | 0.192 | 19.203 | 3.841 | 0.237  | 23.737  | 1017.6 | -- | Open Sea   | Intergenic   |                |
| chr6 | 122,219,436 | 1.22E-03 | 1.01E-01 | 0.585 | 58.505 | 0.805 | 80.505 | 0.225 | 22.495 | 4.500    | 0.148 | 14.815 | 3.841 | 0.221  | 22.109  | 1017.6 | -- | Open Sea   | Intergenic   |                |
| chr6 | 123,386,435 | 1.40E-02 | 6.68E-02 | 0.709 | 70.909 | 0.881 | 88.673 | 0.056 | 5.599  | 1.120    | 0.162 | 16.229 | 3.246 | 0.177  | 17.164  | 1018.6 | -- | Open Sea   | Intergenic   |                |
| chr6 | 123,386,645 | 3.11E-02 | 2.40E-01 | 0.667 | 66.667 | 0.807 | 80.734 | 0.093 | 9.257  | 1.851    | 0.107 | 10.720 | 2.144 | 0.141  | 14.067  | 1018.6 | -- | Open Sea   | Intergenic   |                |
| chr6 | 123,361,500 | 2.51E-02 | 4.69E-04 | 0.651 | 65.116 | 0.394 | 39.394 | 0.096 | 9.555  | 1.911    | 0.176 | 17.638 | 3.528 | -0.257 | -25.722 | 1019.6 | -- | Open Sea   | Intergenic   |                |
| chr6 | 123,361,570 | 4.33E-02 | 4.69E-04 | 0.651 | 65.116 | 0.394 | 39.394 | 0.096 | 9.555  | 1.911    | 0.176 | 17.638 | 3.528 | -0.257 | -25.722 | 1019.6 | -- | Open Sea   | Intergenic   |                |
| chr6 | 124,796,039 | 1.10E-02 | 6.02E-02 | 0.346 | 34.615 | 0.676 | 67.647 | 0.189 | 18.910 | 3.782    | 0.317 | 31.700 | 6.340 | 0.330  | 33.032  | 1020.6 | -- | Open Sea</ |              |                |



|      |            |          |          |        |        |        |        |        |        |       |        |        |       |        |         |        |                |            |            |
|------|------------|----------|----------|--------|--------|--------|--------|--------|--------|-------|--------|--------|-------|--------|---------|--------|----------------|------------|------------|
| chrf | 31,463,623 | 4.98E-02 | 3.19E-01 | 0.622  | 62.162 | 0.852  | 85.185 | 0.383  | 38.259 | 7.652 | 0.208  | 20.787 | 4.157 | 0.230  | 23.023  | 1044_7 | --             | Open Sea   | Intergenic |
| chrf | 31,463,936 | 2.32E-02 | 2.90E-02 | 0.314  | 31.429 | 0.595  | 59.537 | 0.238  | 23.804 | 4.761 | 0.268  | 26.782 | 5.586 | 0.271  | 27.108  | 1044_7 | --             | Open Sea   | Intergenic |
| chrf | 37,199,677 | 5.19E-02 | 5.19E-02 | 0.571  | 57.143 | 0.571  | 57.143 | 0.150  | 15.003 | 8.334 | 0.334  | 33.373 | 6.305 | 0.334  | 33.373  | 42.143 | --             | Open Sea   | Intergenic |
| chrf | 37,199,722 | 2.79E-02 | 3.68E-02 | 0.300  | 30.000 | 0.636  | 63.636 | 0.233  | 23.803 | 6.667 | 0.260  | 25.998 | 5.306 | 0.260  | 25.998  | 1045_7 | Check manually | Open Sea   | Intergenic |
| chrf | 39,422,880 | 3.57E-02 | 2.34E-03 | 0.737  | 73.684 | 0.568  | 56.757 | 0.178  | 17.813 | 3.563 | 0.116  | 11.602 | 2.320 | -0.169 | -16.927 | 1046_7 | --             | Open Sea   | Intergenic |
| chrf | 39,422,880 | 1.28E-02 | 2.88E-02 | 0.681  | 68.142 | 0.822  | 82.203 | 0.088  | 8.806  | 1.761 | 0.076  | 7.508  | 1.502 | 0.141  | 14.062  | 1046_7 | --             | Open Sea   | Intergenic |
| chrf | 40,573,903 | 4.22E-02 | 5.45E-04 | 0.565  | 56.565 | 0.833  | 83.333 | 0.565  | 56.565 | 7.176 | 0.359  | 35.980 | 6.021 | 0.359  | 35.980  | 1047_7 | --             | Open Sea   | Intergenic |
| chrf | 40,573,946 | 2.46E-02 | 5.45E-04 | 0.636  | 63.636 | 0.897  | 89.655 | 0.239  | 23.913 | 4.783 | 0.090  | 8.980  | 1.796 | 0.260  | 26.019  | 1047_7 | --             | Open Sea   | Intergenic |
| chrf | 42,116,984 | 1.19E-02 | 4.23E-02 | 0.306  | 30.556 | 0.667  | 66.667 | 0.151  | 15.090 | 3.018 | 0.189  | 18.659 | 3.372 | 0.361  | 36.111  | 1048_7 | --             | Open Sea   | Intergenic |
| chrf | 42,117,161 | 3.74E-02 | 5.54E-03 | 0.535  | 53.521 | 0.704  | 70.423 | 0.171  | 11.676 | 2.335 | 0.085  | 8.546  | 1.709 | 0.169  | 16.901  | 1048_7 | --             | Open Sea   | Intergenic |
| chrf | 42,387,023 | 1.35E-02 | 1.84E-01 | 0.143  | 14.287 | 0.825  | 82.500 | 0.144  | 14.444 | 0.144 | 0.116  | 11.648 | 2.885 | 0.320  | 30.150  | 1049_7 | --             | Open Sea   | Intergenic |
| chrf | 42,387,292 | 1.75E-02 | 2.25E-01 | 0.571  | 57.143 | 0.825  | 82.500 | 0.096  | 9.589  | 1.918 | 0.166  | 16.586 | 3.317 | 0.254  | 25.357  | 1049_7 | --             | Open Sea   | Intergenic |
| chrf | 42,824,047 | 7.35E-03 | 1.92E-03 | 0.566  | 56.579 | 0.778  | 77.778 | 0.086  | 8.643  | 1.729 | 0.082  | 8.205  | 1.641 | 0.217  | 21.199  | 1050_7 | --             | Open Sea   | Intergenic |
| chrf | 42,824,138 | 4.67E-02 | 1.92E-03 | 0.846  | 84.615 | 0.660  | 66.587 | 0.172  | 17.247 | 3.449 | 0.107  | 10.740 | 2.148 | -0.182 | -18.658 | 1050_7 | --             | Open Sea   | Intergenic |
| chrf | 43,763,854 | 1.89E-02 | 1.03E-02 | 0.769  | 76.923 | 0.556  | 55.556 | 0.132  | 13.250 | 2.650 | 0.227  | 22.698 | 4.540 | -0.214 | -21.368 | 1051_7 | --             | Open Sea   | Intergenic |
| chrf | 43,763,844 | 6.52E-03 | 1.99E-02 | 0.565  | 56.522 | 0.797  | 79.747 | 0.286  | 28.623 | 5.725 | 0.113  | 11.302 | 2.260 | 0.232  | 23.225  | 1051_7 | --             | Open Sea   | Intergenic |
| chrf | 44,363,854 | 3.62E-02 | 1.59E-03 | 0.604  | 60.417 | 0.396  | 39.623 | 0.206  | 20.588 | 4.118 | 0.209  | 20.882 | 4.176 | -0.208 | -20.794 | 1052_7 | --             | S Shelf    | Intergenic |
| chrf | 44,363,898 | 6.83E-02 | 8.32E-04 | 0.820  | 81.967 | 0.584  | 58.442 | 0.127  | 12.714 | 2.543 | 0.248  | 2.428  | 0.486 | -0.235 | -23.526 | 1052_7 | --             | Open Sea   | Intergenic |
| chrf | 47,687,365 | 3.90E-02 | 2.81E-01 | 0.583  | 58.252 | 0.716  | 71.552 | 0.087  | 8.742  | 1.748 | 0.085  | 8.490  | 1.698 | 0.133  | 13.229  | 1053_7 | --             | Open Sea   | Intergenic |
| chrf | 47,688,313 | 4.02E-02 | 1.24E-01 | 0.463  | 46.316 | 0.641  | 64.103 | 0.138  | 13.850 | 2.770 | 0.144  | 14.377 | 2.875 | 0.178  | 17.787  | 1053_7 | TG             | Open Sea   | Intergenic |
| chrf | 51,050,777 | 3.50E-02 | 5.63E-02 | 0.839  | 83.871 | 0.571  | 57.143 | 0.099  | 9.895  | 1.979 | 0.291  | 29.069 | 5.814 | -0.267 | -26.728 | 1054_7 | --             | Open Sea   | Intergenic |
| chrf | 51,050,975 | 3.15E-03 | 0.475    | 47.500 | 0.719  | 71.975 | 0.291  | 29.074 | 5.815  | 0.184 | 18.394 | 3.679  | 0.244 | 24.375 | 1054_7  | --     | Open Sea       | Intergenic |            |
| chrf | 53,524,541 | 1.96E-02 | 9.07E-02 | 0.583  | 58.333 | 0.796  | 79.592 | 0.252  | 25.219 | 5.844 | 0.074  | 7.437  | 1.467 | 0.213  | 21.259  | 1055_7 | --             | Open Sea   | Intergenic |
| chrf | 53,524,925 | 1.10E-02 | 2.63E-01 | 0.360  | 36.000 | 0.724  | 72.414 | 0.367  | 36.670 | 7.334 | 0.184  | 18.409 | 3.682 | 0.364  | 36.414  | 1055_7 | --             | Open Sea   | Intergenic |
| chrf | 54,230,575 | 1.92E-02 | 9.81E-03 | 0.500  | 50.000 | 0.235  | 23.529 | 0.135  | 13.531 | 2.706 | 0.193  | 19.304 | 3.861 | -0.265 | -26.471 | 1056_7 | --             | Open Sea   | Intergenic |
| chrf | 54,230,637 | 2.19E-02 | 9.81E-03 | 0.214  | 21.429 | 0.522  | 52.174 | 0.175  | 17.853 | 0.274 | 0.274  | 27.355 | 5.471 | 0.307  | 30.745  | 1056_7 | --             | Open Sea   | Intergenic |
| chrf | 55,964,502 | 3.96E-02 | 1.51E-02 | 0.879  | 87.879 | 0.633  | 63.333 | 0.059  | 5.919  | 1.984 | 0.228  | 22.793 | 1.984 | -0.245 | -24.545 | 1057_7 | --             | S Shelf    | Intergenic |
| chrf | 55,964,585 | 3.75E-02 | 1.44E-02 | 0.594  | 59.375 | 0.833  | 83.333 | 0.239  | 23.942 | 4.788 | 0.173  | 17.301 | 3.460 | 0.240  | 23.958  | 1057_7 | --             | S Shelf    | Intergenic |
| chrf | 58,933,384 | 3.57E-02 | 5.34E-03 | 0.860  | 86.000 | 0.697  | 69.697 | 0.100  | 9.957  | 1.991 | 0.138  | 13.811 | 2.762 | -0.163 | -16.303 | 1058_7 | --             | Open Sea   | Intergenic |
| chrf | 58,933,384 | 2.50E-03 | 2.89E-03 | 0.757  | 75.744 | 0.545  | 54.545 | 0.757  | 75.744 | 0.860 | 0.102  | 10.242 | 1.913 | -0.259 | -25.943 | 1058_7 | --             | Open Sea   | Intergenic |
| chrf | 59,920,081 | 1.73E-03 | 5.36E-03 | 0.500  | 50.000 | 0.775  | 77.500 | 0.060  | 6.041  | 1.208 | 0.064  | 6.391  | 1.278 | 0.077  | 27.500  | 1059_7 | --             | Open Sea   | Intergenic |
| chrf | 59,920,251 | 1.79E-02 | 1.97E-02 | 0.438  | 43.810 | 0.615  | 61.458 | 0.178  | 17.767 | 3.553 | 0.101  | 10.137 | 2.027 | 0.176  | 17.649  | 1059_7 | --             | Open Sea   | Intergenic |
| chrf | 61,967,555 | 2.45E-02 | 1.20E-01 | 0.278  | 27.778 | 0.552  | 55.172 | 0.135  | 13.482 | 2.696 | 0.300  | 29.951 | 5.990 | 0.274  | 27.395  | 1060_7 | --             | Open Sea   | Intergenic |
| chrf | 61,967,555 | 1.20E-02 | 1.20E-01 | 0.278  | 27.778 | 0.552  | 55.172 | 0.135  | 13.482 | 2.696 | 0.300  | 29.951 | 5.990 | 0.274  | 27.395  | 1060_7 | --             | Open Sea   | Intergenic |
| chrf | 61,967,567 | 2.72E-02 | 1.91E-01 | 0.162  | 16.243 | 0.423  | 42.308 | 0.193  | 19.286 | 3.857 | 0.229  | 22.914 | 4.583 | 0.261  | 26.091  | 1061_7 | --             | Open Sea   | Intergenic |
| chrf | 61,967,567 | 2.72E-02 | 1.91E-01 | 0.162  | 16.216 | 0.423  | 42.308 | 0.193  | 19.286 | 3.857 | 0.229  | 22.914 | 4.583 | 0.261  | 26.091  | 1061_7 | --             | Open Sea   | Intergenic |
| chrf | 65,338,043 | 3.49E-02 | 1.19E-01 | 0.172  | 17.241 | 0.393  | 39.344 | 0.099  | 9.924  | 1.985 | 0.221  | 22.072 | 4.414 | 0.221  | 22.103  | 1061_7 | CT             | Open Sea   | Intergenic |
| chrf | 65,338,043 | 3.49E-02 | 1.19E-01 | 0.172  | 17.241 | 0.393  | 39.344 | 0.099  | 9.924  | 1.985 | 0.221  | 22.072 | 4.414 | 0.221  | 22.103  | 1061_7 | CT             | Open Sea   | Intergenic |
| chrf | 65,338,043 | 3.49E-02 | 1.19E-01 | 0.172  | 17.241 | 0.393  | 39.344 | 0.099  | 9.924  | 1.985 | 0.221  | 22.072 | 4.414 | 0.221  | 22.103  | 1061_7 | CT             | Open Sea   | Intergenic |
| chrf | 65,338,813 | 3.79E-02 | 3.79E-02 | 0.486  | 48.649 | 0.714  | 71.429 | 0.274  | 27.394 | 5.479 | 0.087  | 8.718  | 1.744 | 0.228  | 22.780  | 1061_7 | ag             | Open Sea   | Intergenic |
| chrf | 65,338,813 | 3.79E-02 | 3.79E-02 | 0.486  | 48.649 | 0.714  | 71.429 | 0.274  | 27.394 | 5.479 | 0.087  | 8.718  | 1.744 | 0.228  | 22.780  | 1061_7 | ag             | Open Sea   | Intergenic |
| chrf | 65,338,813 | 3.79E-02 | 3.79E-02 | 0.486  | 48.649 | 0.714  | 71.429 | 0.274  | 27.394 | 5.479 | 0.087  | 8.718  | 1.744 | 0.228  | 22.780  | 1061_7 | ag             | Open Sea   | Intergenic |
| chrf | 65,354,643 | 3.93E-02 | 1.18E-04 | 0.909  | 90.909 | 0.766  | 76.563 | 0.197  | 19.688 | 3.938 | 0.124  | 12.366 | 2.473 | -0.143 | -14.347 | 1062_7 | --             | Open Sea   | Intergenic |
| chrf | 65,354,643 | 3.93E-02 | 1.18E-04 | 0.909  | 90.909 | 0.766  | 76.563 | 0.197  | 19.688 | 3.938 | 0.124  | 12.366 | 2.473 | -0.143 | -14.347 | 1062_7 | --             | Open Sea   | Intergenic |
| chrf | 65,354,643 | 3.93E-02 | 1.18E-04 | 0.909  | 90.909 | 0.766  | 76.563 | 0.197  | 19.688 | 3.938 | 0.124  | 12.366 | 2.473 | -0.143 | -14.347 | 1062_7 | --             | Open Sea   | Intergenic |
| chrf | 65,354,643 | 3.93E-02 | 1.18E-04 | 0.909  | 90.909 | 0.766  | 76.563 | 0.197  | 19.688 | 3.938 | 0.124  | 12.366 | 2.473 | -0.143 | -14.347 | 1062_7 | --             | Open Sea   | Intergenic |
| chrf | 65,354,679 | 1.27E-02 | 1.18E-04 | 0.885  | 88.462 | 0.672  | 67.164 | 0.193  | 19.306 | 3.861 | 0.245  | 24.508 | 4.902 | -0.213 | -21.297 | 1062_7 | AA             | Open Sea   | Intergenic |
| chrf | 65,354,679 | 1.27E-02 | 1.18E-04 | 0.885  | 88.462 | 0.672  | 67.164 | 0.193  | 19.306 | 3.861 | 0.245  | 24.508 | 4.902 | -0.213 | -21.297 | 1062_7 | AA             | Open Sea   | Intergenic |
| chrf | 65,354,679 | 1.27E-02 | 1.18E-04 | 0.885  | 88.462 | 0.672  | 67.164 | 0.193  | 19.306 | 3.861 | 0.245  | 24.508 | 4.902 | -0.213 | -21.297 | 1062_7 | AA             | Open Sea   | Intergenic |
| chrf | 65,354,679 | 1.27E-02 | 1.18E-04 | 0.885  | 88.462 | 0.672  | 67.164 | 0.193  | 19.306 | 3.861 | 0.245  | 24.508 | 4.902 | -0.213 | -21.297 | 1062_7 | AA             | Open Sea   | Intergenic |
| chrf | 69,947,020 | 2.87E-02 | 4.46E-02 | 0.157  | 15.686 | 0.354  | 35.417 | 0.133  | 13.251 | 2.650 | 0.094  | 9.364  | 1.873 | 0.197  | 19.730  | 1063_7 | --             | Open Sea   | Intergenic |
| chrf | 69,947,020 | 1.34E-02 | 4.46E-02 | 0.340  | 34.043 | 0.610  | 60.976 | 0.189  | 18.930 | 3.786 | 0.138  | 13.795 | 2.759 | 0.169  | 26.933  | 1063_7 | --             | Open Sea   | Intergenic |
| chrf | 70,254,334 | 2.72E-02 | 2.70E-03 | 0.446  | 44.643 | 0.646  | 64.615 | 0.311  | 31.126 | 6.225 | 0.074  | 7.440  | 1.488 | 0.200  | 19.973  | 1064_7 | --             | Open Sea   | Intergenic |
| chrf | 72,194,581 | 1.78E-02 | 2.70E-03 | 0.446  | 44.643 | 0.646  | 64.615 | 0.311  | 31.126 | 6.225 | 0.074  | 7.440  | 1.488 | 0.200  | 19.973  | 1064_7 | --             | Open Sea   | Intergenic |
| chrf | 72,194,581 | 4.30E-02 | 7.74E-03 | 0.618  | 61.765 | 0.853  | 85.294 | 0.172  | 17.191 | 3.438 | 0.212  | 21.582 | 4.316 | 0.235  | 23.529  | 1065_7 | --             | Open Sea   | Intergenic |
| chrf | 72,194,647 | 3.73E-02 | 6.79E-03 | 0.364  | 36.364 | 0.700  | 70.000 | 0.415  | 41.500 | 8.300 | 0.221  | 22.119 | 4.424 | 0.336  | 33.636  | 1065_7 | --             | Open Sea   | Intergenic |
| chrf | 72,439,457 | 1.68E-02 | 1.20E-03 | 0.697  | 69.697 | 0.909  | 90.909 | 0.183  | 18.277 | 3.655 | 0.055  | 5.537  | 1.107 | 0.212  | 21.212  | 1066_7 | --             | Open Sea   | Intergenic |
| chrf | 72,439,457 | 1.28E-02 | 1.20E-03 | 0.697  | 69.697 | 0.909  | 90.909 | 0.183  | 18.277 | 3.655 | 0.055  | 5.537  | 1.107 | 0.212  | 21.212  | 1066_7 | --             | Open Sea   | Intergenic |
| chrf | 77,046,827 | 6.29E-03 | 1.72E-04 | 0.419  | 41.905 | 0.647  | 64.706 | 0.271  | 27.140 | 5.428 | 0.093  | 9.349  | 1.870 | 0.228  | 22.801  | 1067_7 | --             | Open Sea   | Intergenic |
| chrf | 77,046,960 | 4.78E-03 | 1.72E-04 | 0.72   |        |        |        |        |        |       |        |        |       |        |         |        |                |            |            |



|      |             |          |          |       |        |       |        |       |        |       |       |        |        |        |         |        |                |          |                  |         |
|------|-------------|----------|----------|-------|--------|-------|--------|-------|--------|-------|-------|--------|--------|--------|---------|--------|----------------|----------|------------------|---------|
| chr7 | 122,356,845 | 3.08E-02 | 4.87E-04 | 0.250 | 25.000 | 0.519 | 51.852 | 0.187 | 18.675 | 3.735 | 0.108 | 10.833 | 2.167  | 0.269  | 26.852  | 1089_7 | Check manually | Open Sea | Intron 2/17      | Pkbc    |
| chr7 | 126,888,022 | 3.72E-02 | 7.37E-05 | 0.273 | 27.273 | 0.538 | 53.846 | 0.206 | 20.647 | 4.129 | 0.112 | 11.180 | 2.236  | 0.286  | 26.573  | 1090_7 | --             | S Shelf  | Intron 5/5       | Tmem219 |
| chr7 | 126,888,022 | 3.72E-02 | 7.37E-05 | 0.273 | 27.273 | 0.538 | 53.846 | 0.206 | 20.647 | 4.129 | 0.112 | 11.180 | 2.236  | 0.286  | 26.573  | 1090_7 | --             | S Shelf  | Intron 5/6       | Tmem219 |
| chr7 | 126,888,022 | 3.72E-02 | 7.37E-05 | 0.273 | 27.273 | 0.538 | 53.846 | 0.206 | 20.647 | 4.129 | 0.112 | 11.180 | 2.236  | 0.286  | 26.573  | 1090_7 | --             | S Shelf  | Intron 4/4       | Tmem219 |
| chr7 | 126,888,022 | 3.72E-02 | 7.37E-05 | 0.273 | 27.273 | 0.538 | 53.846 | 0.206 | 20.647 | 4.129 | 0.112 | 11.180 | 2.236  | 0.286  | 26.573  | 1090_7 | --             | S Shelf  | Intron 5/5       | Tmem219 |
| chr7 | 126,888,022 | 3.72E-02 | 7.37E-05 | 0.273 | 27.273 | 0.538 | 53.846 | 0.206 | 20.647 | 4.129 | 0.112 | 11.180 | 2.236  | 0.286  | 26.573  | 1090_7 | --             | S Shelf  | Intron 1/1       | Tmem219 |
| chr7 | 126,888,022 | 3.72E-02 | 7.37E-05 | 0.273 | 27.273 | 0.538 | 53.846 | 0.206 | 20.647 | 4.129 | 0.112 | 11.180 | 2.236  | 0.286  | 26.573  | 1090_7 | --             | S Shelf  | Intron 2/2       | Tmem219 |
| chr7 | 126,888,074 | 1.70E-02 | 7.37E-05 | 0.143 | 14.286 | 0.550 | 55.000 | 0.107 | 10.715 | 2.143 | 0.362 | 36.179 | 7.236  | 0.407  | 40.714  | 1090_7 | --             | S Shelf  | Intron 5/5       | Tmem219 |
| chr7 | 126,888,074 | 1.70E-02 | 7.37E-05 | 0.143 | 14.286 | 0.550 | 55.000 | 0.107 | 10.715 | 2.143 | 0.362 | 36.179 | 7.236  | 0.407  | 40.714  | 1090_7 | --             | S Shelf  | Intron 6/6       | Tmem219 |
| chr7 | 126,888,074 | 1.70E-02 | 7.37E-05 | 0.143 | 14.286 | 0.550 | 55.000 | 0.107 | 10.715 | 2.143 | 0.362 | 36.179 | 7.236  | 0.407  | 40.714  | 1090_7 | --             | S Shelf  | Intron 4/4       | Tmem219 |
| chr7 | 126,888,074 | 1.70E-02 | 7.37E-05 | 0.143 | 14.286 | 0.550 | 55.000 | 0.107 | 10.715 | 2.143 | 0.362 | 36.179 | 7.236  | 0.407  | 40.714  | 1090_7 | --             | S Shelf  | Intron 5/6       | Tmem219 |
| chr7 | 126,888,074 | 1.70E-02 | 7.37E-05 | 0.143 | 14.286 | 0.550 | 55.000 | 0.107 | 10.715 | 2.143 | 0.362 | 36.179 | 7.236  | 0.407  | 40.714  | 1090_7 | --             | S Shelf  | Intron 1/1       | Tmem219 |
| chr7 | 127,133,210 | 2.61E-02 | 3.57E-01 | 0.473 | 47.297 | 0.667 | 66.667 | 0.112 | 11.223 | 2.245 | 0.091 | 9.137  | 1.827  | 0.194  | 19.369  | 1091_7 | CG             | Open Sea | false intergenic | Spn     |
| chr7 | 127,133,948 | 1.81E-02 | 7.22E-02 | 0.208 | 20.833 | 0.542 | 54.167 | 0.140 | 14.907 | 2.981 | 0.112 | 11.180 | 2.967  | 0.333  | 33.333  | 1091_7 | CG             | Open Sea | TA               | Spn     |
| chr7 | 129,238,216 | 6.09E-03 | 5.46E-02 | 0.765 | 76.471 | 0.450 | 45.000 | 0.177 | 17.740 | 3.548 | 0.233 | 23.292 | 4.658  | -0.315 | -31.471 | 1092_7 | Check manually | Open Sea | Intergenic       |         |
| chr7 | 129,238,442 | 3.72E-02 | 2.63E-01 | 0.471 | 47.059 | 0.226 | 22.581 | 0.282 | 28.194 | 5.639 | 0.135 | 13.532 | 2.708  | -0.245 | -24.478 | 1092_7 | TA             | Open Sea | Intergenic       |         |
| chr7 | 130,593,688 | 2.82E-02 | 2.82E-04 | 0.111 | 11.111 | 0.349 | 34.286 | 0.141 | 14.051 | 2.810 | 0.388 | 38.620 | 7.364  | 0.232  | 23.179  | 1093_7 | CG             | Open Sea | Intron 1/6       | Tacc2   |
| chr7 | 130,593,704 | 2.68E-03 | 2.82E-04 | 0.111 | 11.111 | 0.412 | 41.176 | 0.124 | 12.307 | 2.479 | 0.163 | 16.332 | 3.266  | 0.301  | 30.065  | 1093_7 | CG             | Open Sea | Intron 1/6       | Tacc2   |
| chr7 | 134,585,459 | 3.07E-02 | 1.18E-04 | 0.286 | 28.571 | 0.667 | 66.667 | 0.345 | 34.468 | 6.894 | 0.397 | 39.668 | 7.934  | 0.381  | 38.095  | 1094_7 | CA             | Open Sea | Intergenic       |         |
| chr7 | 134,585,620 | 1.95E-02 | 7.17E-05 | 0.240 | 24.000 | 0.600 | 60.000 | 0.180 | 17.972 | 3.594 | 0.303 | 30.290 | 6.058  | 0.360  | 36.000  | 1094_7 | CG             | Open Sea | Intergenic       |         |
| chr7 | 136,492,178 | 4.96E-03 | 2.11E-02 | 0.132 | 13.158 | 0.464 | 46.429 | 0.184 | 18.397 | 3.679 | 0.271 | 27.121 | 5.424  | 0.333  | 33.271  | 1095_7 | CG             | Open Sea | Intergenic       |         |
| chr7 | 136,492,203 | 3.27E-02 | 2.11E-02 | 0.152 | 15.152 | 0.409 | 40.909 | 0.125 | 12.495 | 2.499 | 0.361 | 36.059 | 7.212  | 0.258  | 25.758  | 1095_7 | CG             | Open Sea | Intergenic       |         |
| chr7 | 139,206,507 | 4.71E-02 | 1.30E-01 | 0.787 | 78.723 | 0.660 | 66.000 | 0.162 | 16.242 | 3.248 | 0.077 | 7.727  | 1.545  | -0.127 | -12.723 | 1096_7 | --             | Open Sea | Intergenic       |         |
| chr7 | 139,206,847 | 2.31E-02 | 1.45E-01 | 0.674 | 67.391 | 0.876 | 87.600 | 0.156 | 15.634 | 3.127 | 0.080 | 8.204  | 1.796  | 0.204  | 20.414  | 1096_7 | --             | Open Sea | Intergenic       |         |
| chr7 | 142,467,527 | 8.80E-03 | 4.80E-02 | 0.422 | 42.208 | 0.642 | 64.198 | 0.115 | 11.481 | 2.266 | 0.138 | 13.800 | 2.781  | 0.220  | 21.990  | 1097_7 | --             | Open Sea | Intron 1/10      | Lap1    |
| chr7 | 142,467,527 | 8.80E-03 | 4.80E-02 | 0.422 | 42.208 | 0.642 | 64.198 | 0.115 | 11.481 | 2.266 | 0.138 | 13.800 | 2.781  | 0.220  | 21.990  | 1097_7 | --             | Open Sea | Intron 1/10      | Lap1    |
| chr7 | 142,467,763 | 2.73E-02 | 7.75E-02 | 0.868 | 86.756 | 0.757 | 75.694 | 0.059 | 5.889  | 1.174 | 0.104 | 10.401 | 2.080  | -0.111 | -11.061 | 1097_7 | --             | Open Sea | Intron 1/10      | Lap1    |
| chr7 | 142,467,763 | 2.73E-02 | 7.75E-02 | 0.868 | 86.756 | 0.757 | 75.694 | 0.059 | 5.889  | 1.174 | 0.104 | 10.401 | 2.080  | -0.111 | -11.061 | 1097_7 | --             | Open Sea | Intron 1/10      | Lap1    |
| chr8 | 5,344,106   | 3.83E-02 | 3.57E-02 | 0.875 | 87.500 | 0.656 | 65.625 | 0.137 | 13.704 | 2.741 | 0.195 | 19.465 | 3.891  | -0.219 | -21.875 | 1098_8 | GA             | Open Sea | Intergenic       |         |
| chr8 | 5,344,834   | 3.21E-02 | 1.56E-02 | 0.406 | 40.625 | 0.677 | 67.742 | 0.211 | 21.095 | 4.219 | 0.169 | 16.871 | 3.374  | 0.271  | 27.117  | 1098_8 | --             | Open Sea | Intergenic       |         |
| chr8 | 7,987,626   | 7.42E-04 | 4.51E-07 | 0.140 | 13.953 | 0.486 | 48.649 | 0.082 | 8.223  | 1.645 | 0.233 | 23.312 | 4.662  | 0.347  | 34.695  | 1099_8 | CG             | Open Sea | Intergenic       |         |
| chr8 | 7,987,686   | 1.98E-03 | 4.51E-07 | 0.191 | 19.118 | 0.343 | 34.286 | 0.078 | 7.817  | 1.615 | 0.233 | 23.315 | 4.798  | 0.347  | 34.798  | 1099_8 | CG             | Open Sea | Intergenic       |         |
| chr8 | 7,987,737   | 1.09E-03 | 1.74E-09 | 0.210 | 20.988 | 0.526 | 52.632 | 0.136 | 13.562 | 2.712 | 0.246 | 24.617 | 4.923  | 0.316  | 31.644  | 1099_8 | CG             | Open Sea | Intergenic       |         |
| chr8 | 7,987,792   | 4.08E-02 | 2.68E-09 | 0.461 | 46.053 | 0.705 | 70.455 | 0.126 | 12.565 | 2.513 | 0.163 | 16.312 | 3.262  | 0.244  | 24.402  | 1099_8 | CC             | Open Sea | Intergenic       |         |
| chr8 | 10,170,794  | 2.67E-02 | 6.31E-03 | 0.754 | 75.362 | 0.577 | 57.746 | 0.127 | 12.657 | 2.531 | 0.192 | 19.172 | 3.834  | -0.176 | -17.616 | 1100_8 | GG             | Open Sea | Intergenic       |         |
| chr8 | 10,170,994  | 3.55E-03 | 3.48E-03 | 0.754 | 75.362 | 0.577 | 57.746 | 0.127 | 12.657 | 2.531 | 0.192 | 19.172 | 3.834  | -0.176 | -17.616 | 1100_8 | GG             | Open Sea | Intergenic       |         |
| chr8 | 10,598,333  | 1.50E-02 | 8.77E-07 | 0.231 | 23.077 | 0.560 | 56.000 | 0.396 | 39.572 | 7.914 | 0.081 | 8.122  | 1.624  | 0.329  | 32.923  | 1101_8 | CG nearby      | Open Sea | Intergenic       |         |
| chr8 | 10,598,415  | 2.59E-03 | 2.43E-07 | 0.150 | 15.000 | 0.577 | 57.692 | 0.120 | 12.042 | 2.408 | 0.105 | 10.543 | 2.109  | 0.427  | 42.692  | 1101_8 | AG             | Open Sea | Intergenic       |         |
| chr8 | 10,598,422  | 1.41E-03 | 2.43E-07 | 0.150 | 15.000 | 0.625 | 62.500 | 0.151 | 15.074 | 3.015 | 0.095 | 9.464  | 1.893  | 0.475  | 47.500  | 1101_8 | AG             | Open Sea | Intergenic       |         |
| chr8 | 32,040,239  | 2.29E-02 | 2.29E-02 | 0.611 | 61.111 | 0.882 | 88.200 | 0.286 | 28.602 | 5.174 | 0.173 | 17.290 | 4.882  | 0.258  | 25.533  | 1102_8 | --             | Open Sea | Intergenic       |         |
| chr8 | 32,040,273  | 2.79E-02 | 2.29E-03 | 0.611 | 61.111 | 0.811 | 81.132 | 0.128 | 12.846 | 2.569 | 0.192 | 19.222 | 3.844  | 0.200  | 20.021  | 1102_8 | ct             | Open Sea | Intergenic       |         |
| chr8 | 32,453,984  | 1.01E-02 | 2.69E-02 | 0.125 | 12.500 | 0.444 | 44.444 | 0.205 | 20.497 | 0.099 | 0.062 | 0.225  | 1.245  | 0.319  | 31.944  | 1103_8 | --             | Open Sea | Intergenic       |         |
| chr8 | 32,454,481  | 1.02E-02 | 2.69E-01 | 0.758 | 75.758 | 0.536 | 53.571 | 0.162 | 16.225 | 3.245 | 0.256 | 25.632 | 5.126  | -0.222 | -22.186 | 1103_8 | --             | Open Sea | Intergenic       |         |
| chr8 | 32,570,582  | 3.09E-02 | 3.09E-02 | 0.833 | 83.333 | 0.632 | 63.158 | 0.195 | 19.494 | 3.899 | 0.297 | 29.715 | 6.378  | -0.202 | -20.175 | 1104_8 | --             | Open Sea | Intergenic       |         |
| chr8 | 32,570,865  | 3.71E-02 | 3.71E-02 | 0.441 | 44.118 | 0.179 | 17.857 | 0.266 | 26.621 | 5.324 | 0.273 | 27.348 | 5.677  | -0.261 | -26.261 | 1104_8 | --             | Open Sea | Intergenic       |         |
| chr8 | 35,370,996  | 2.82E-02 | 3.56E-02 | 0.409 | 40.909 | 0.148 | 14.815 | 0.188 | 18.767 | 3.753 | 0.186 | 18.626 | 3.725  | -0.261 | -26.094 | 1105_8 | --             | Open Sea | Intron 2/3       | Gm45469 |
| chr8 | 35,371,143  | 3.97E-02 | 9.43E-04 | 0.727 | 72.727 | 0.500 | 50.000 | 0.138 | 13.834 | 2.767 | 0.308 | 30.845 | 6.169  | -0.227 | -22.727 | 1105_8 | --             | Open Sea | Intron 2/3       | Gm45469 |
| chr8 | 43,903,465  | 1.23E-02 | 1.23E-02 | 0.606 | 60.606 | 0.857 | 85.714 | 0.260 | 26.062 | 5.196 | 0.266 | 26.606 | 9.816  | 0.251  | 25.106  | 1106_8 | --             | Open Sea | Intergenic       |         |
| chr8 | 43,903,602  | 5.30E-03 | 5.73E-01 | 0.406 | 40.625 | 0.806 | 80.645 | 0.188 | 18.773 | 3.755 | 0.137 | 13.731 | 2.746  | 0.400  | 40.020  | 1106_8 | --             | Open Sea | Intergenic       |         |
| chr8 | 45,507,276  | 4.72E-03 | 4.73E-03 | 0.346 | 34.615 | 0.750 | 75.000 | 0.195 | 19.454 | 3.891 | 0.189 | 18.944 | 3.789  | 0.404  | 40.385  | 1107_8 | TG             | Open Sea | TSS 1500         | Sorbs2  |
| chr8 | 45,507,310  | 1.74E-02 | 8.12E-03 | 0.238 | 23.810 | 0.568 | 56.757 | 0.156 | 15.577 | 3.115 | 0.228 | 22.848 | 5.970  | 0.329  | 32.947  | 1107_8 | GC             | Open Sea | TSS 1500         | Sorbs2  |
| chr8 | 49,105,178  | 2.11E-02 | 0.87E-02 | 0.754 | 75.400 | 0.812 | 81.200 | 0.183 | 18.273 | 3.119 | 0.650 | 65.000 | 11.580 | 0.318  | 31.580  | 1108_8 | TA             | Open Sea | Intergenic       |         |
| chr8 | 49,105,237  | 2.39E-02 | 2.11E-02 | 0.809 | 80.851 | 0.538 | 53.846 | 0.142 | 14.216 | 2.843 | 0.273 | 27.315 | 5.463  | -0.229 | -22.705 | 1108_8 | TT             | Open Sea | Intergenic       |         |
| chr8 | 49,105,954  | 2.78E-02 | 1.56E-02 | 0.843 | 84.286 | 0.683 | 68.293 | 0.137 | 13.693 | 2.739 | 0.172 | 17.157 | 3.431  | -0.160 | -15.993 | 1108_8 | ag             | Open Sea | Intergenic       |         |
| chr8 | 49,363,056  | 4.18E-02 | 3.46E-05 | 0.353 | 35.294 | 0.562 | 56.164 | 0.202 | 20.215 | 4.043 | 0.197 | 19.725 | 3.945  | 0.209  | 20.870  | 1109_8 | TA             | Open Sea | Intergenic       |         |
| chr8 | 49,363,081  | 3.49E-02 | 3.46E-05 | 0.353 | 35.294 | 0.562 | 56.164 | 0.202 | 20.215 | 4.043 | 0.197 | 19.725 | 3.945  | 0.209  | 20.870  | 1109_8 | TA             | Open Sea | Intergenic       |         |
| chr8 | 49,363,088  | 1.62E-02 | 3.46E-05 | 0.462 | 46.154 | 0.746 | 74.627 | 0.291 | 29.113 | 5.823 | 0.159 | 15.950 | 3.190  | 0.285  | 28.473  | 1109_8 | CG             | Open Sea | Intergenic       |         |
| chr8 | 51,867,602  | 1.18E-02 | 5.58E-02 | 0.750 | 75.000 | 0.441 | 44.048 | 0.130 | 12.991 | 2.598 |       |        |        |        |         |        |                |          |                  |         |



|      |             |          |          |       |         |       |        |       |        |       |       |        |       |        |         |        |           |          |             |       |
|------|-------------|----------|----------|-------|---------|-------|--------|-------|--------|-------|-------|--------|-------|--------|---------|--------|-----------|----------|-------------|-------|
| chr8 | 107,906,727 | 3.21E-02 | 1.46E-04 | 0.200 | 20.000  | 0.340 | 33.981 | 0.109 | 10.885 | 2.177 | 0.170 | 16.995 | 3.399 | 0.140  | 13.981  | 1133_8 | --        | Open Sea | Intergenic  |       |
| chr8 | 107,906,846 | 6.87E-03 | 1.88E-05 | 0.217 | 21.678  | 0.406 | 40.625 | 0.215 | 21.485 | 4.297 | 0.097 | 9.722  | 1.944 | 0.189  | 18.947  | 1133_8 | --        | Open Sea | Intergenic  |       |
| chr8 | 107,906,862 | 1.10E-06 | 1.88E-06 | 0.207 | 52.7153 | 0.607 | 60.748 | 0.100 | 10.042 | 0.100 | 0.116 | 11.573 | 0.116 | 0.170  | 17.035  | 1133_8 | --        | Open Sea | Intergenic  |       |
| chr8 | 110,042,492 | 2.17E-02 | 4.94E-02 | 0.321 | 32.143  | 0.640 | 64.000 | 0.316 | 31.576 | 6.315 | 0.284 | 28.442 | 5.688 | 0.318  | 31.857  | 1134_8 | --        | Open Sea | Intergenic  |       |
| chr8 | 110,042,496 | 9.79E-03 | 3.87E-02 | 0.179 | 17.857  | 0.542 | 54.167 | 0.410 | 41.001 | 8.200 | 0.248 | 24.766 | 4.953 | 0.363  | 36.310  | 1134_8 | --        | Open Sea | Intergenic  |       |
| chr8 | 111,185,041 | 2.51E-02 | 2.83E-02 | 0.263 | 26.316  | 0.548 | 54.839 | 0.385 | 38.455 | 7.691 | 0.177 | 17.716 | 3.543 | 0.285  | 28.523  | 1135_8 | GG        | Open Sea | Intron 7/24 | Gig1  |
| chr8 | 111,185,041 | 2.51E-02 | 2.83E-02 | 0.263 | 26.316  | 0.548 | 54.839 | 0.385 | 38.455 | 7.691 | 0.177 | 17.716 | 3.543 | 0.285  | 28.523  | 1135_8 | GG        | Open Sea | Intron 7/24 | Gig1  |
| chr8 | 111,185,041 | 2.51E-02 | 2.83E-02 | 0.263 | 26.316  | 0.548 | 54.839 | 0.385 | 38.455 | 7.691 | 0.177 | 17.716 | 3.543 | 0.285  | 28.523  | 1135_8 | GG        | Open Sea | Intron 7/24 | Gig1  |
| chr8 | 111,185,053 | 3.46E-02 | 2.83E-02 | 0.263 | 26.316  | 0.533 | 53.333 | 0.373 | 37.257 | 7.451 | 0.168 | 16.849 | 3.370 | 0.270  | 27.018  | 1135_8 | CA        | Open Sea | Intron 7/24 | Gig1  |
| chr8 | 111,185,053 | 3.46E-02 | 2.83E-02 | 0.263 | 26.316  | 0.533 | 53.333 | 0.373 | 37.257 | 7.451 | 0.168 | 16.849 | 3.370 | 0.270  | 27.018  | 1135_8 | CA        | Open Sea | Intron 7/24 | Gig1  |
| chr8 | 111,185,128 | 3.82E-02 | 9.80E-04 | 0.192 | 19.231  | 0.480 | 48.000 | 0.206 | 20.616 | 4.123 | 0.275 | 27.550 | 5.510 | 0.288  | 28.769  | 1135_8 | --        | Open Sea | Intron 5/20 | Gig1  |
| chr8 | 111,185,128 | 3.82E-02 | 9.80E-04 | 0.192 | 19.231  | 0.480 | 48.000 | 0.206 | 20.616 | 4.123 | 0.275 | 27.550 | 5.510 | 0.288  | 28.769  | 1135_8 | --        | Open Sea | Intron 5/20 | Gig1  |
| chr8 | 111,185,128 | 3.82E-02 | 9.80E-04 | 0.192 | 19.231  | 0.480 | 48.000 | 0.206 | 20.616 | 4.123 | 0.275 | 27.550 | 5.510 | 0.288  | 28.769  | 1135_8 | --        | Open Sea | Intron 5/20 | Gig1  |
| chr8 | 112,940,636 | 3.98E-02 | 7.09E-02 | 0.193 | 19.296  | 0.394 | 39.394 | 0.114 | 11.391 | 2.275 | 0.217 | 21.653 | 4.331 | 0.201  | 20.096  | 1136_8 | CA        | Open Sea | Intergenic  |       |
| chr8 | 112,940,650 | 7.99E-03 | 7.09E-02 | 0.154 | 15.385  | 0.491 | 49.123 | 0.115 | 11.537 | 2.307 | 0.258 | 25.805 | 5.161 | 0.337  | 33.738  | 1136_8 | AG        | Open Sea | Intergenic  |       |
| chr8 | 116,864,996 | 1.51E-02 | 1.86E-03 | 0.855 | 85.484  | 0.660 | 66.000 | 0.082 | 8.184  | 1.637 | 0.103 | 10.268 | 2.054 | -0.195 | -19.484 | 1137_8 | --        | Open Sea | Intergenic  |       |
| chr8 | 116,865,003 | 2.99E-02 | 1.86E-03 | 0.814 | 81.429  | 0.643 | 64.286 | 0.132 | 13.170 | 2.634 | 0.087 | 8.695  | 1.739 | -0.171 | -17.143 | 1137_8 | --        | Open Sea | Intergenic  |       |
| chr8 | 118,234,445 | 6.81E-03 | 6.81E-03 | 0.153 | 15.333  | 0.455 | 45.455 | 0.117 | 11.741 | 2.346 | 0.277 | 27.652 | 5.345 | 0.348  | 32.121  | 1138_8 | --        | Open Sea | Intergenic  |       |
| chr8 | 118,234,514 | 3.21E-02 | 1.39E-03 | 0.160 | 16.000  | 0.450 | 45.000 | 0.109 | 10.865 | 2.173 | 0.361 | 36.132 | 7.226 | 0.290  | 29.000  | 1138_8 | CG        | Open Sea | Intergenic  |       |
| chr8 | 118,355,483 | 3.61E-02 | 1.30E-01 | 0.795 | 79.545  | 0.571 | 57.143 | 0.112 | 11.250 | 2.250 | 0.190 | 19.867 | 3.793 | -0.224 | -22.403 | 1138_8 | --        | Open Sea | Intron 1/13 | Cdh13 |
| chr8 | 118,355,722 | 4.43E-02 | 2.42E-01 | 0.500 | 50.000  | 0.588 | 68.750 | 0.075 | 7.471  | 1.494 | 0.131 | 13.106 | 2.621 | 0.188  | 18.750  | 1138_8 | --        | Open Sea | Intron 1/13 | Cdh13 |
| chr8 | 122,909,683 | 5.40E-03 | 1.87E-05 | 0.130 | 13.000  | 0.579 | 57.895 | 0.114 | 11.402 | 2.280 | 0.288 | 28.846 | 5.769 | 0.449  | 44.851  | 1140_8 | --        | Open Sea | Intergenic  |       |
| chr8 | 122,909,687 | 1.70E-02 | 1.87E-05 | 0.174 | 17.391  | 0.528 | 52.778 | 0.129 | 12.942 | 2.588 | 0.259 | 25.939 | 5.188 | 0.354  | 35.386  | 1140_8 | --        | Open Sea | Intergenic  |       |
| chr8 | 123,438,734 | 6.17E-03 | 5.13E-05 | 0.116 | 11.628  | 0.500 | 50.000 | 0.078 | 7.768  | 1.554 | 0.243 | 24.338 | 4.868 | 0.384  | 38.372  | 1141_8 | --        | Open Sea | Intergenic  |       |
| chr8 | 123,438,760 | 5.13E-03 | 5.13E-05 | 0.116 | 11.628  | 0.500 | 50.000 | 0.078 | 7.768  | 1.554 | 0.243 | 24.338 | 4.868 | 0.384  | 38.372  | 1141_8 | --        | Open Sea | Intergenic  |       |
| chr8 | 126,759,631 | 1.69E-02 | 1.25E-03 | 0.405 | 40.476  | 0.682 | 68.182 | 0.342 | 34.156 | 6.202 | 0.231 | 23.037 | 4.147 | 0.420  | 41.950  | 1142_8 | --        | Open Sea | Intergenic  |       |
| chr8 | 126,759,671 | 1.54E-02 | 1.25E-03 | 0.393 | 39.286  | 0.625 | 62.290 | 0.292 | 29.180 | 5.836 | 0.117 | 11.677 | 2.335 | 0.220  | 23.009  | 1142_8 | --        | Open Sea | Intergenic  |       |
| chr8 | 5,321,317   | 2.39E-02 | 4.73E-05 | 0.321 | 32.143  | 0.600 | 60.000 | 0.178 | 17.786 | 3.557 | 0.162 | 16.176 | 3.235 | 0.279  | 27.857  | 1143_9 | CT        | Open Sea | Exon 2/9    | Casp4 |
| chr8 | 5,321,387   | 4.36E-02 | 4.79E-05 | 0.321 | 32.143  | 0.600 | 60.000 | 0.178 | 17.786 | 3.557 | 0.162 | 16.176 | 3.235 | 0.279  | 27.857  | 1143_9 | CT        | Open Sea | Exon 2/9    | Casp4 |
| chr8 | 5,321,409   | 2.26E-02 | 4.79E-05 | 0.207 | 20.690  | 0.541 | 54.054 | 0.215 | 21.477 | 4.295 | 0.304 | 30.418 | 6.084 | 0.334  | 33.364  | 1143_9 | CG nearby | Open Sea | Intron 2/9  | Casp4 |
| chr8 | 7,828,839   | 5.46E-03 | 9.29E-05 | 0.806 | 80.645  | 0.467 | 46.667 | 0.213 | 21.328 | 4.266 | 0.227 | 22.703 | 4.541 | -0.340 | -33.978 | 1144_9 | --        | Open Sea | Intron 1/6  | Birc2 |
| chr8 | 7,828,839   | 5.46E-03 | 9.29E-05 | 0.806 | 80.645  | 0.467 | 46.667 | 0.213 | 21.328 | 4.266 | 0.227 | 22.703 | 4.541 | -0.340 | -33.978 | 1144_9 | --        | Open Sea | Intron 1/6  | Birc2 |
| chr8 | 7,828,839   | 5.46E-03 | 9.29E-05 | 0.806 | 80.645  | 0.467 | 46.667 | 0.213 | 21.328 | 4.266 | 0.227 | 22.703 | 4.541 | -0.340 | -33.978 | 1144_9 | --        | Open Sea | Intron 1/6  | Birc2 |
| chr8 | 7,828,839   | 5.46E-03 | 9.29E-05 | 0.806 | 80.645  | 0.467 | 46.667 | 0.213 | 21.328 | 4.266 | 0.227 | 22.703 | 4.541 | -0.340 | -33.978 | 1144_9 | --        | Open Sea | Intron 1/6  | Birc2 |
| chr8 | 9,374,473   | 3.80E-02 | 1.24E-01 | 0.712 | 71.154  | 0.571 | 57.143 | 0.084 | 8.434  | 1.687 | 0.129 | 12.877 | 2.575 | -0.281 | -28.103 | 1144_9 | --        | Open Sea | Intron 2/7  | Birc2 |
| chr8 | 9,374,489   | 3.41E-02 | 1.20E-01 | 0.783 | 78.333  | 0.603 | 60.345 | 0.105 | 10.537 | 2.107 | 0.143 | 14.336 | 2.867 | -0.180 | -17.989 | 1145_9 | TA        | Open Sea | Intron 2/7  | Birc2 |
| chr8 | 9,374,489   | 3.41E-02 | 1.20E-01 | 0.783 | 78.333  | 0.603 | 60.345 | 0.105 | 10.537 | 2.107 | 0.143 | 14.336 | 2.867 | -0.180 | -17.989 | 1145_9 | TA        | Open Sea | Intron 2/7  | Birc2 |
| chr8 | 9,374,489   | 3.41E-02 | 1.20E-01 | 0.783 | 78.333  | 0.603 | 60.345 | 0.105 | 10.537 | 2.107 | 0.143 | 14.336 | 2.867 | -0.180 | -17.989 | 1145_9 | TA        | Open Sea | Intron 2/7  | Birc2 |
| chr8 | 9,374,489   | 3.41E-02 | 1.20E-01 | 0.783 | 78.333  | 0.603 | 60.345 | 0.105 | 10.537 | 2.107 | 0.143 | 14.336 | 2.867 | -0.180 | -17.989 | 1145_9 | TA        | Open Sea | Intron 2/7  | Birc2 |
| chr8 | 9,374,489   | 3.41E-02 | 1.20E-01 | 0.783 | 78.333  | 0.603 | 60.345 | 0.105 | 10.537 | 2.107 | 0.143 | 14.336 | 2.867 | -0.180 | -17.989 | 1145_9 | TA        | Open Sea | Intron 2/7  | Birc2 |
| chr8 | 9,374,489   | 3.41E-02 | 1.20E-01 | 0.783 | 78.333  | 0.603 | 60.345 | 0.105 | 10.537 | 2.107 | 0.143 | 14.336 | 2.867 | -0.180 | -17.989 | 1145_9 | TA        | Open Sea | Intron 2/7  | Birc2 |
| chr8 | 9,374,489   | 3.41E-02 | 1.20E-01 | 0.783 | 78.333  | 0.603 | 60.345 | 0.105 | 10.537 | 2.107 | 0.143 | 14.336 | 2.867 | -0.180 | -17.989 | 1145_9 | TA        | Open Sea | Intron 2/7  | Birc2 |
| chr8 | 9,374,489   | 3.41E-02 | 1.20E-01 | 0.783 | 78.333  | 0.603 | 60.345 | 0.105 | 10.537 | 2.107 | 0.143 | 14.336 | 2.867 | -0.180 | -17.989 | 1145_9 | TA        | Open Sea | Intron 2/7  | Birc2 |
| chr8 | 9,374,489   | 3.41E-02 | 1.20E-01 | 0.783 | 78.333  | 0.603 | 60.345 | 0.105 | 10.537 | 2.107 | 0.143 | 14.336 | 2.867 | -0.180 | -17.989 | 1145_9 | TA        | Open Sea | Intron 2/7  | Birc2 |
| chr8 | 9,374,489   | 3.41E-02 | 1.20E-01 | 0.783 | 78.333  | 0.603 | 60.345 | 0.105 | 10.537 | 2.107 | 0.143 | 14.336 | 2.867 | -0.180 | -17.989 | 1145_9 | TA        | Open Sea | Intron 2/7  | Birc2 |
| chr8 | 9,374,489   | 3.41E-02 | 1.20E-01 | 0.783 | 78.333  | 0.603 | 60.345 | 0.105 | 10.537 | 2.107 | 0.143 | 14.336 | 2.867 | -0.180 | -17.989 | 1145_9 | TA        | Open Sea | Intron 2/7  | Birc2 |
| chr8 | 9,374,489   | 3.41E-02 | 1.20E-01 | 0.783 | 78.333  | 0.603 | 60.345 | 0.105 | 10.537 | 2.107 | 0.143 | 14.336 | 2.867 | -0.180 | -17.989 | 1145_9 | TA        | Open Sea | Intron 2/7  | Birc2 |
| chr8 | 9,374,489   | 3.41E-02 | 1.20E-01 | 0.783 | 78.333  | 0.603 | 60.345 | 0.105 | 10.537 | 2.107 | 0.143 | 14.336 | 2.867 | -0.180 | -17.989 | 1145_9 | TA        | Open Sea | Intron 2/7  | Birc2 |
| chr8 | 9,374,489   | 3.41E-02 | 1.20E-01 | 0.783 | 78.333  | 0.603 | 60.345 | 0.105 | 10.537 | 2.107 | 0.143 | 14.336 | 2.867 | -0.180 | -17.989 | 1145_9 | TA        | Open Sea | Intron 2/7  | Birc2 |
| chr8 | 9,374,489   | 3.41E-02 | 1.20E-01 | 0.783 | 78.333  | 0.603 | 60.345 | 0.105 | 10.537 | 2.107 | 0.143 | 14.336 | 2.867 | -0.180 | -17.989 | 1145_9 | TA        | Open Sea | Intron 2/7  | Birc2 |
| chr8 | 9,374,489   | 3.41E-02 | 1.20E-01 | 0.783 | 78.333  | 0.603 | 60.345 | 0.105 | 10.537 | 2.107 | 0.143 | 14.336 | 2.867 | -0.180 | -17.989 | 1145_9 | TA        | Open Sea | Intron 2/7  | Birc2 |
| chr8 | 9,374,489   | 3.41E-02 | 1.20E-01 | 0.783 | 78.333  | 0.603 | 60.345 | 0.105 | 10.537 | 2.107 | 0.143 | 14.336 | 2.867 | -0.180 | -17.989 | 1145_9 | TA        | Open Sea | Intron 2/7  | Birc2 |
| chr8 | 9,374,489   | 3.41E-02 | 1.20E-01 | 0.783 | 78.333  | 0.603 | 60.345 | 0.105 | 10.537 | 2.107 | 0.143 | 14.336 | 2.867 | -0.180 | -17.989 | 1145_9 | TA        | Open Sea | Intron 2/7  | Birc2 |
| chr8 | 9,374,489   | 3.41E-02 | 1.20E-01 | 0.783 | 78.333  | 0.603 | 60.345 | 0.105 | 10.537 | 2.107 | 0.143 | 14.336 | 2.867 | -0.180 | -17.989 | 1145_9 | TA        | Open Sea | Intron 2/7  | Birc2 |
| chr8 | 9,374,489   | 3.41E-02 | 1.20E-01 | 0.783 | 78.333  | 0.603 | 60.345 | 0.105 | 10.537 | 2.107 | 0.143 | 14.336 | 2.867 | -0.180 | -17.989 | 1145_9 | TA        | Open Sea | Intron 2/7  | Birc2 |
| chr8 | 9,374,489   | 3.41E-02 | 1.20E-01 | 0.783 | 78.333  | 0.603 | 60.345 | 0.105 | 10.537 | 2.107 | 0.143 | 14.336 | 2.867 | -0.180 | -17.989 | 1145_9 | TA        | Open Sea | Intron 2/7  | Birc2 |
| chr8 | 9,374,489   | 3.41E-02 | 1.20E-01 | 0.783 | 78.333  | 0.603 | 60.345 | 0.105 | 10.537 | 2.107 | 0.143 | 14.336 | 2.867 | -0.180 | -17.989 | 1145_9 | TA        | Open Sea | Intron 2/7  | Birc2 |
| chr8 | 9,374,489   | 3.41E-02 | 1.20E-01 | 0     |         |       |        |       |        |       |       |        |       |        |         |        |           |          |             |       |



|      |             |          |          |       |        |       |        |       |        |       |       |        |        |        |         |        |                |          |              |
|------|-------------|----------|----------|-------|--------|-------|--------|-------|--------|-------|-------|--------|--------|--------|---------|--------|----------------|----------|--------------|
| chr9 | 91,093,391  | 3.85E-02 | 2.98E-02 | 0.694 | 69.355 | 0.527 | 52.747 | 0.106 | 10.598 | 2.120 | 0.119 | 11.946 | 2.389  | -0.166 | -16.608 | 1179.9 | CG nearby      | Open Sea | Intergenic   |
| chr9 | 91,093,648  | 1.83E-02 | 9.87E-01 | 0.567 | 56.667 | 0.844 | 84.375 | 0.233 | 23.291 | 4.658 | 0.167 | 16.696 | 3.339  | 0.277  | 27.708  | 1179.9 | TA             | Open Sea | Intergenic   |
| chr9 | 91,114,688  | 1.53E-02 | 1.38E-01 | 0.563 | 55.263 | 0.763 | 76.271 | 0.203 | 20.306 | 4.051 | 0.189 | 18.873 | 3.775  | 0.180  | 18.579  | 1180.9 | TG             | Open Sea | Intergenic   |
| chr9 | 91,185,449  | 4.91E-02 | 4.91E-02 | 0.577 | 57.692 | 0.761 | 76.271 | 0.203 | 20.254 | 4.051 | 0.189 | 18.873 | 3.775  | 0.180  | 18.579  | 1180.9 | --             | Open Sea | Intergenic   |
| chr9 | 91,296,954  | 3.15E-02 | 1.09E-01 | 0.340 | 33.962 | 0.561 | 56.098 | 0.157 | 15.686 | 3.137 | 0.106 | 10.627 | 2.125  | 0.221  | 22.135  | 1181.9 | AG             | Open Sea | Intergenic   |
| chr9 | 91,297,458  | 3.66E-02 | 3.24E-01 | 0.605 | 60.465 | 0.822 | 82.222 | 0.199 | 19.899 | 3.980 | 0.114 | 11.402 | 2.280  | 0.218  | 21.757  | 1181.9 | --             | Open Sea | Intergenic   |
| chr9 | 91,491,061  | 4.83E-02 | 4.04E-01 | 0.462 | 46.214 | 0.462 | 46.214 | 0.462 | 46.214 | 0.462 | 0.202 | 20.248 | 4.051  | 0.185  | 18.452  | 1182.9 | CG             | Open Sea | Intergenic   |
| chr9 | 91,491,620  | 2.69E-02 | 2.69E-02 | 0.732 | 73.171 | 0.489 | 48.889 | 0.194 | 19.370 | 3.874 | 0.219 | 21.883 | 4.377  | -0.243 | -24.282 | 1182.9 | --             | Open Sea | Intergenic   |
| chr9 | 91,754,732  | 2.71E-02 | 2.18E-02 | 0.571 | 57.143 | 0.821 | 82.051 | 0.244 | 24.367 | 4.873 | 0.072 | 7.175  | 1.435  | 0.249  | 24.908  | 1183.9 | Nitr           | Open Sea | Intergenic   |
| chr9 | 91,754,747  | 1.04E-02 | 2.18E-02 | 0.382 | 38.235 | 0.683 | 68.293 | 0.273 | 27.259 | 5.452 | 0.187 | 18.702 | 3.740  | 0.301  | 30.057  | 1183.9 | --             | Open Sea | Intergenic   |
| chr9 | 91,755,520  | 1.06E-02 | 2.75E-02 | 0.407 | 40.655 | 0.683 | 68.293 | 0.273 | 27.259 | 5.452 | 0.187 | 18.702 | 3.740  | 0.301  | 30.057  | 1183.9 | --             | Open Sea | Intergenic   |
| chr9 | 91,991,303  | 3.02E-02 | 3.02E-02 | 0.432 | 43.243 | 0.704 | 70.370 | 0.138 | 13.804 | 2.761 | 0.145 | 14.547 | 2.909  | 0.271  | 27.127  | 1184.9 | --             | Open Sea | Intergenic   |
| chr9 | 91,991,524  | 2.69E-02 | 1.70E-01 | 0.241 | 24.138 | 0.571 | 57.143 | 0.159 | 15.919 | 3.184 | 0.347 | 34.651 | 6.930  | 0.330  | 33.005  | 1184.9 | --             | Open Sea | Intergenic   |
| chr9 | 92,373,326  | 4.75E-02 | 3.23E-03 | 0.593 | 59.259 | 0.759 | 75.862 | 0.137 | 13.740 | 2.748 | 0.118 | 11.848 | 2.370  | 0.166  | 16.803  | 1185.9 | --             | Open Sea | Intergenic   |
| chr9 | 92,373,335  | 3.34E-02 | 3.33E-03 | 0.464 | 46.353 | 0.763 | 76.271 | 0.131 | 13.144 | 2.629 | 0.141 | 14.062 | 2.689  | 0.188  | 18.688  | 1185.9 | --             | Open Sea | Intergenic   |
| chr9 | 93,267,523  | 3.28E-02 | 3.15E-01 | 0.783 | 78.261 | 0.645 | 64.486 | 0.104 | 10.360 | 2.072 | 0.188 | 18.785 | 3.757  | -0.138 | -13.775 | 1186.9 | TA             | Open Sea | Intergenic   |
| chr9 | 93,268,307  | 9.77E-03 | 9.77E-03 | 0.581 | 58.065 | 0.843 | 84.314 | 0.210 | 20.981 | 4.196 | 0.099 | 9.878  | 1.976  | 0.262  | 26.249  | 1186.9 | TT             | Open Sea | Intergenic   |
| chr9 | 96,399,556  | 1.67E-02 | 2.28E-03 | 0.902 | 90.244 | 0.736 | 73.585 | 0.407 | 40.723 | 8.145 | 0.199 | 19.878 | 2.176  | -0.167 | -16.659 | 1187.9 | --             | Open Sea | Intergenic   |
| chr9 | 96,399,558  | 4.93E-02 | 2.28E-03 | 0.856 | 85.600 | 0.738 | 73.532 | 0.391 | 39.070 | 7.814 | 0.068 | 6.557  | 1.811  | -0.118 | -11.768 | 1187.9 | --             | Open Sea | Intergenic   |
| chr9 | 96,399,617  | 4.71E-02 | 2.28E-03 | 0.798 | 79.825 | 0.670 | 67.010 | 0.363 | 36.325 | 7.265 | 0.115 | 11.505 | 2.301  | -0.128 | -12.814 | 1187.9 | --             | Open Sea | Intergenic   |
| chr9 | 98,046,806  | 4.20E-02 | 1.86E-01 | 0.829 | 82.927 | 0.638 | 63.830 | 0.145 | 14.483 | 2.897 | 0.212 | 21.202 | 4.240  | -0.191 | -19.097 | 1188.9 | Check manually | Open Sea | Intergenic   |
| chr9 | 98,046,890  | 9.49E-03 | 3.03E-01 | 0.452 | 45.161 | 0.771 | 77.143 | 0.055 | 5.477  | 1.095 | 0.212 | 21.248 | 4.256  | 0.320  | 31.982  | 1188.9 | --             | Open Sea | Intergenic   |
| chr9 | 101,384,327 | 3.15E-02 | 3.14E-01 | 0.647 | 64.706 | 0.857 | 85.714 | 0.214 | 21.421 | 4.284 | 0.150 | 14.589 | 2.998  | 0.210  | 21.008  | 1189.9 | --             | Open Sea | Intergenic   |
| chr9 | 101,385,067 | 2.89E-02 | 3.48E-02 | 0.758 | 75.806 | 0.903 | 90.323 | 0.145 | 14.524 | 2.905 | 0.065 | 6.504  | 1.301  | 0.145  | 14.516  | 1189.9 | --             | Open Sea | Intergenic   |
| chr9 | 105,759,338 | 1.04E-02 | 1.22E-03 | 0.783 | 78.261 | 0.544 | 54.386 | 0.144 | 14.371 | 2.874 | 0.087 | 8.737  | 1.747  | -0.239 | -23.875 | 1190.9 | --             | Open Sea | Intron 13/36 |
| chr9 | 105,759,479 | 2.30E-02 | 2.98E-03 | 0.833 | 83.333 | 0.538 | 53.946 | 0.129 | 12.942 | 2.588 | 0.121 | 12.962 | 2.416  | -0.226 | -22.467 | 1190.9 | --             | Open Sea | Intron 13/36 |
| chr9 | 109,285,729 | 2.00E-02 | 4.77E-03 | 0.677 | 67.692 | 0.442 | 44.186 | 0.213 | 21.347 | 4.349 | 0.270 | 27.217 | 21.737 | -0.235 | -23.506 | 1191.9 | --             | Open Sea | Intergenic   |
| chr9 | 109,285,923 | 1.16E-02 | 1.17E-03 | 0.385 | 38.462 | 0.708 | 70.833 | 0.186 | 18.558 | 3.712 | 0.194 | 19.398 | 3.880  | 0.232  | 32.372  | 1191.9 | --             | Open Sea | Intergenic   |
| chr9 | 117,120,437 | 2.10E-02 | 3.39E-02 | 0.310 | 30.952 | 0.658 | 65.789 | 0.198 | 19.838 | 3.968 | 0.261 | 26.063 | 5.217  | 0.348  | 34.837  | 1192.9 | AT             | Open Sea | Intron 1/14  |
| chr9 | 117,120,492 | 3.47E-02 | 3.47E-02 | 0.713 | 71.322 | 0.542 | 54.217 | 0.197 | 19.674 | 4.243 | 0.197 | 19.674 | 4.243  | 0.197  | 19.674  | 1192.9 | TA             | Open Sea | Intergenic   |
| chr9 | 120,155,864 | 1.82E-03 | 2.24E-05 | 0.932 | 93.052 | 0.591 | 59.091 | 0.057 | 5.698  | 1.140 | 0.234 | 23.436 | 4.687  | -0.341 | -34.091 | 1193.9 | --             | Open Sea | Intergenic   |
| chr9 | 120,155,923 | 1.22E-02 | 2.17E-03 | 0.795 | 79.545 | 0.552 | 55.172 | 0.131 | 13.090 | 2.618 | 0.135 | 13.483 | 2.697  | -0.244 | -24.373 | 1193.9 | ta             | Open Sea | Intergenic   |
| chr9 | 121,729,749 | 3.08E-02 | 4.23E-03 | 0.595 | 59.459 | 0.857 | 85.714 | 0.191 | 19.096 | 3.819 | 0.204 | 20.440 | 4.088  | 0.263  | 26.255  | 1194.9 | CA             | Open Sea | Intron 5/16  |
| chr9 | 121,729,749 | 3.08E-02 | 4.23E-03 | 0.595 | 59.459 | 0.857 | 85.714 | 0.191 | 19.096 | 3.819 | 0.204 | 20.440 | 4.088  | 0.263  | 26.255  | 1194.9 | CA             | Open Sea | Intron 5/16  |
| chr9 | 121,729,749 | 3.08E-02 | 4.23E-03 | 0.595 | 59.459 | 0.857 | 85.714 | 0.191 | 19.096 | 3.819 | 0.204 | 20.440 | 4.088  | 0.263  | 26.255  | 1194.9 | CA             | Open Sea | Intron 5/16  |
| chr9 | 121,729,749 | 3.08E-02 | 4.23E-03 | 0.595 | 59.459 | 0.857 | 85.714 | 0.191 | 19.096 | 3.819 | 0.204 | 20.440 | 4.088  | 0.263  | 26.255  | 1194.9 | CA             | Open Sea | Intron 5/16  |
| chr9 | 121,729,749 | 3.08E-02 | 4.23E-03 | 0.595 | 59.459 | 0.857 | 85.714 | 0.191 | 19.096 | 3.819 | 0.204 | 20.440 | 4.088  | 0.263  | 26.255  | 1194.9 | CA             | Open Sea | Intron 5/16  |
| chr9 | 121,729,786 | 2.75E-02 | 4.23E-03 | 0.241 | 24.138 | 0.550 | 55.000 | 0.159 | 15.878 | 3.176 | 0.361 | 36.056 | 7.211  | 0.309  | 30.862  | 1194.9 | CT             | Open Sea | Intron 4/10  |
| chr9 | 121,729,786 | 2.75E-02 | 4.23E-03 | 0.241 | 24.138 | 0.550 | 55.000 | 0.159 | 15.878 | 3.176 | 0.361 | 36.056 | 7.211  | 0.309  | 30.862  | 1194.9 | CT             | Open Sea | Intron 4/10  |
| chr9 | 121,729,786 | 2.75E-02 | 4.23E-03 | 0.241 | 24.138 | 0.550 | 55.000 | 0.159 | 15.878 | 3.176 | 0.361 | 36.056 | 7.211  | 0.309  | 30.862  | 1194.9 | CT             | Open Sea | Intron 4/10  |
| chr9 | 121,729,786 | 2.75E-02 | 4.23E-03 | 0.241 | 24.138 | 0.550 | 55.000 | 0.159 | 15.878 | 3.176 | 0.361 | 36.056 | 7.211  | 0.309  | 30.862  | 1194.9 | CT             | Open Sea | Intron 4/10  |
| chr9 | 121,729,786 | 2.75E-02 | 4.23E-03 | 0.241 | 24.138 | 0.550 | 55.000 | 0.159 | 15.878 | 3.176 | 0.361 | 36.056 | 7.211  | 0.309  | 30.862  | 1194.9 | CT             | Open Sea | Intron 4/10  |
| chr9 | 121,729,786 | 2.75E-02 | 4.23E-03 | 0.241 | 24.138 | 0.550 | 55.000 | 0.159 | 15.878 | 3.176 | 0.361 | 36.056 | 7.211  | 0.309  | 30.862  | 1194.9 | CT             | Open Sea | Intron 4/10  |
| chr9 | 121,729,786 | 2.75E-02 | 4.23E-03 | 0.241 | 24.138 | 0.550 | 55.000 | 0.159 | 15.878 | 3.176 | 0.361 | 36.056 | 7.211  | 0.309  | 30.862  | 1194.9 | CT             | Open Sea | Intron 4/10  |
| chr9 | 121,729,786 | 2.75E-02 | 4.23E-03 | 0.241 | 24.138 | 0.550 | 55.000 | 0.159 | 15.878 | 3.176 | 0.361 | 36.056 | 7.211  | 0.309  | 30.862  | 1194.9 | CT             | Open Sea | Intron 4/10  |
| chr9 | 121,729,786 | 2.75E-02 | 4.23E-03 | 0.241 | 24.138 | 0.550 | 55.000 | 0.159 | 15.878 | 3.176 | 0.361 | 36.056 | 7.211  | 0.309  | 30.862  | 1194.9 | CT             | Open Sea | Intron 4/10  |
| chr9 | 121,729,786 | 2.75E-02 | 4.23E-03 | 0.241 | 24.138 | 0.550 | 55.000 | 0.159 | 15.878 | 3.176 | 0.361 | 36.056 | 7.211  | 0.309  | 30.862  | 1194.9 | CT             | Open Sea | Intron 4/10  |
| chr9 | 121,729,786 | 2.75E-02 | 4.23E-03 | 0.241 | 24.138 | 0.550 | 55.000 | 0.159 | 15.878 | 3.176 | 0.361 | 36.056 | 7.211  | 0.309  | 30.862  | 1194.9 | CT             | Open Sea | Intron 4/10  |
| chr9 | 121,729,786 | 2.75E-02 | 4.23E-03 | 0.241 | 24.138 | 0.550 | 55.000 | 0.159 | 15.878 | 3.176 | 0.361 | 36.056 | 7.211  | 0.309  | 30.862  | 1194.9 | CT             | Open Sea | Intron 4/10  |
| chr9 | 121,729,786 | 2.75E-02 | 4.23E-03 | 0.241 | 24.138 | 0.550 | 55.000 | 0.159 | 15.878 | 3.176 | 0.361 | 36.056 | 7.211  | 0.309  | 30.862  | 1194.9 | CT             | Open Sea | Intron 4/10  |
| chr9 | 121,729,786 | 2.75E-02 | 4.23E-03 | 0.241 | 24.138 | 0.550 | 55.000 | 0.159 | 15.878 | 3.176 | 0.361 | 36.056 | 7.211  | 0.309  | 30.862  | 1194.9 | CT             | Open Sea | Intron 4/10  |
| chr9 | 121,729,786 | 2.75E-02 | 4.23E-03 | 0.241 | 24.138 | 0.550 | 55.000 | 0.159 | 15.878 | 3.176 | 0.361 | 36.056 | 7.211  | 0.309  | 30.862  | 1194.9 | CT             | Open Sea | Intron 4/10  |
| chr9 | 121,729,786 | 2.75E-02 | 4.23E-03 | 0.241 | 24.138 | 0.550 | 55.000 | 0.159 | 15.878 | 3.176 | 0.361 | 36.056 | 7.211  | 0.309  | 30.862  | 1194.9 | CT             | Open Sea | Intron 4/10  |
| chr9 | 121,729,786 | 2.75E-02 | 4.23E-03 | 0.241 | 24.138 | 0.550 | 55.000 | 0.159 | 15.878 | 3.176 | 0.361 | 36.056 | 7.211  | 0.309  | 30.862  | 1194.9 | CT             | Open Sea | Intron 4/10  |
| chr9 | 121,729,786 | 2.75E-02 | 4.23E-03 | 0.241 | 24.138 | 0.550 | 55.000 | 0.159 | 15.878 | 3.176 | 0.361 | 36.056 | 7.211  | 0.309  | 30.862  | 1194.9 | CT             | Open Sea | Intron 4/10  |
| chr9 | 121,729,786 | 2.75E-02 | 4.23E-03 | 0.241 | 24.138 | 0.550 | 55.000 | 0.159 | 15.878 | 3.176 | 0.361 | 36.056 | 7.211  | 0.309  | 30.862  | 1194.9 | CT             | Open Sea | Intron 4/10  |
| chr9 | 121,729,786 | 2.75E-02 | 4.23E-03 | 0.241 | 24.138 | 0.550 | 55.000 | 0.159 | 15.878 | 3.176 | 0.361 | 36.056 | 7.211  | 0.309  | 30.862  | 1194.9 | CT             | Open Sea | Intron 4/10  |
| chr9 | 121,729,786 | 2.75E-02 | 4.23E-03 | 0.241 | 24.138 | 0.550 | 55.000 | 0.159 | 15.878 | 3.176 | 0.361 | 36.056 | 7.211  | 0.309  | 30.862  | 1194.9 | CT             | Open Sea | Intron 4/10  |
| chr9 | 121,729,786 | 2.75E-02 | 4.23E-03 | 0.241 | 24.138 | 0.550 | 55.000 | 0.159 | 15.878 | 3.176 | 0.361 |        |        |        |         |        |                |          |              |



|      |            |          |          |        |        |        |        |       |        |       |       |        |       |        |         |        |                |          |            |
|------|------------|----------|----------|--------|--------|--------|--------|-------|--------|-------|-------|--------|-------|--------|---------|--------|----------------|----------|------------|
| chrX | 42,698,187 | 3.39E-02 | 5.29E-03 | 0.701  | 70.093 | 0.824  | 82.407 | 0.115 | 11.488 | 2.298 | 0.083 | 8.298  | 1.660 | 0.123  | 12.314  | 1225_X | CT             | Open Sea | Intergenic |
| chrX | 42,698,235 | 3.25E-02 | 5.29E-03 | 0.647  | 64.706 | 0.785  | 78.485 | 0.093 | 9.342  | 1.868 | 0.068 | 6.779  | 1.356 | 0.138  | 13.789  | 1225_X | Check manually | Open Sea | Intergenic |
| chrX | 44,128,773 | 1.35E-02 | 1.38E-02 | 0.385  | 38.582 | 0.659  | 65.867 | 0.180 | 18.025 | 3.405 | 0.180 | 2.074  | 0.272 | 0.274  | 27.382  | 1226_X | --             | Open Sea | Intergenic |
| chrX | 44,128,831 | 5.48E-03 | 4.06E-02 | 0.531  | 53.061 | 0.781  | 78.125 | 0.052 | 5.195  | 1.039 | 0.084 | 8.398  | 1.680 | 0.251  | 25.064  | 1226_X | --             | Open Sea | Intergenic |
| chrX | 45,064,453 | 4.26E-02 | 4.26E-02 | 0.561  | 56.122 | 0.702  | 70.213 | 0.090 | 8.987  | 1.797 | 0.181 | 16.123 | 3.225 | 0.141  | 14.090  | 1227_X | --             | Open Sea | Intergenic |
| chrX | 45,065,073 | 4.29E-03 | 4.29E-03 | 0.769  | 76.923 | 0.450  | 45.000 | 0.145 | 14.450 | 2.890 | 0.260 | 26.001 | 5.200 | -0.319 | -31.923 | 1227_X | --             | Open Sea | Intergenic |
| chrX | 45,914,423 | 1.30E-02 | 1.64E-01 | 0.643  | 64.367 | 0.867  | 86.687 | 0.281 | 28.112 | 6.624 | 0.112 | 6.624  | 0.234 | 0.234  | 23.286  | 1228_X | --             | Open Sea | Intergenic |
| chrX | 45,915,012 | 4.18E-02 | 2.65E-01 | 0.565  | 56.522 | 0.818  | 81.818 | 0.207 | 20.736 | 4.147 | 0.181 | 18.089 | 3.618 | 0.253  | 25.296  | 1228_X | --             | Open Sea | Intergenic |
| chrX | 46,592,401 | 1.35E-02 | 0.771    | 77.143 | 0.485  | 48.485 | 48.485 | 0.124 | 12.393 | 2.079 | 0.148 | 14.759 | 2.952 | -0.287 | -28.658 | 1229_X | CG             | Open Sea | Intergenic |
| chrX | 46,593,373 | 2.12E-02 | 2.12E-02 | 0.760  | 76.000 | 0.429  | 42.857 | 0.166 | 16.600 | 3.320 | 0.270 | 27.003 | 5.401 | -0.331 | -33.143 | 1229_X | TG             | Open Sea | Intergenic |
| chrX | 46,591,778 | 1.52E-02 | 0.88E-03 | 0.829  | 82.845 | 0.829  | 82.845 | 0.160 | 16.000 | 0.983 | 0.083 | 0.983  | 0.301 | 0.301  | 3.001   | 1230_X | --             | Open Sea | Intergenic |
| chrX | 48,231,836 | 8.77E-03 | 8.84E-03 | 0.556  | 55.556 | 0.829  | 82.857 | 0.243 | 24.325 | 4.865 | 0.108 | 10.846 | 2.169 | 0.279  | 27.339  | 1230_X | --             | Open Sea | Intergenic |
| chrX | 49,336,727 | 4.71E-02 | 3.41E-03 | 0.271  | 27.083 | 0.475  | 47.500 | 0.092 | 9.160  | 1.832 | 0.144 | 14.375 | 2.875 | 0.204  | 20.417  | 1231_X | --             | Open Sea | Intergenic |
| chrX | 49,336,759 | 1.32E-02 | 3.41E-03 | 0.478  | 47.826 | 0.765  | 76.471 | 0.187 | 18.747 | 3.749 | 0.140 | 14.029 | 2.806 | 0.286  | 28.645  | 1231_X | --             | Open Sea | Intergenic |
| chrX | 49,337,237 | 4.84E-02 | 4.84E-02 | 0.515  | 51.515 | 0.200  | 20.000 | 0.314 | 31.414 | 6.263 | 0.352 | 6.263  | 0.210 | -0.315 | -31.515 | 1231_X | --             | Open Sea | Intergenic |
| chrX | 49,738,421 | 3.67E-02 | 2.17E-02 | 0.614  | 61.404 | 0.797  | 79.661 | 0.119 | 11.902 | 2.380 | 0.094 | 9.392  | 1.873 | 0.183  | 18.258  | 1232_X | TG             | Open Sea | Intergenic |
| chrX | 49,738,790 | 3.46E-02 | 3.46E-02 | 0.545  | 54.545 | 0.689  | 68.888 | 0.073 | 7.280  | 1.456 | 0.122 | 12.163 | 2.433 | 0.143  | 14.322  | 1232_X | CG nearby      | Open Sea | Intergenic |
| chrX | 51,857,410 | 2.45E-02 | 2.25E-01 | 0.420  | 42.000 | 0.682  | 68.231 | 0.274 | 27.415 | 5.483 | 0.199 | 19.919 | 3.984 | 0.272  | 27.231  | 1233_X | --             | Open Sea | Intergenic |
| chrX | 51,857,542 | 4.74E-02 | 5.50E-02 | 0.417  | 41.667 | 0.644  | 64.407 | 0.351 | 35.070 | 4.411 | 0.092 | 9.158  | 1.832 | 0.227  | 22.744  | 1233_X | --             | Open Sea | Intergenic |
| chrX | 52,080,521 | 3.51E-02 | 7.72E-03 | 0.604  | 60.377 | 0.889  | 88.889 | 0.291 | 29.140 | 5.828 | 0.194 | 19.374 | 3.875 | 0.285  | 28.512  | 1234_X | GT             | Open Sea | Intron 2/8 |
| chrX | 52,080,606 | 4.96E-02 | 7.72E-03 | 0.333  | 33.333 | 0.630  | 62.963 | 0.209 | 20.913 | 4.183 | 0.317 | 31.658 | 6.332 | 0.296  | 29.630  | 1234_X | CA             | Open Sea | Intron 2/8 |
| chrX | 54,169,199 | 2.31E-02 | 3.59E-01 | 0.304  | 30.435 | 0.708  | 70.833 | 0.161 | 16.054 | 3.614 | 0.387 | 38.744 | 7.749 | 0.404  | 40.399  | 1235_X | --             | Open Sea | Intergenic |
| chrX | 54,170,534 | 3.12E-02 | 3.12E-02 | 0.442  | 44.156 | 0.632  | 63.235 | 0.221 | 22.054 | 4.411 | 0.189 | 18.870 | 3.774 | 0.191  | 19.079  | 1235_X | --             | Open Sea | Intergenic |
| chrX | 55,393,785 | 2.17E-02 | 1.62E-02 | 0.564  | 56.410 | 0.824  | 82.353 | 0.178 | 17.836 | 3.567 | 0.118 | 11.773 | 2.355 | 0.259  | 25.943  | 1236_X | --             | Open Sea | Intergenic |
| chrX | 55,393,925 | 3.97E-02 | 3.91E-02 | 0.535  | 53.488 | 0.304  | 30.435 | 0.273 | 27.271 | 5.454 | 0.166 | 16.650 | 3.330 | -0.231 | -23.054 | 1236_X | --             | Open Sea | Intergenic |
| chrX | 55,657,763 | 2.29E-02 | 7.31E-02 | 0.077  | 7.592  | 0.139  | 13.944 | 0.088 | 2.759  | 0.088 | 0.088 | 1.770  | 0.404 | -0.173 | -17.308 | 1237_X | --             | Open Sea | Intergenic |
| chrX | 55,657,922 | 2.21E-02 | 2.36E-01 | 0.325  | 32.500 | 0.582  | 58.537 | 0.199 | 19.915 | 3.983 | 0.282 | 28.211 | 6.280 | 0.280  | 28.037  | 1237_X | --             | Open Sea | Intergenic |
| chrX | 55,863,726 | 3.65E-03 | 1.33E-04 | 0.393  | 39.344 | 0.672  | 67.213 | 0.142 | 14.172 | 2.834 | 0.156 | 15.568 | 3.114 | 0.279  | 27.869  | 1238_X | --             | Open Sea | Intergenic |
| chrX | 55,863,879 | 6.39E-03 | 3.44E-04 | 0.628  | 62.791 | 0.304  | 30.357 | 0.206 | 20.600 | 4.120 | 0.173 | 17.291 | 3.458 | -0.324 | -32.434 | 1238_X | --             | Open Sea | Intergenic |
| chrX | 59,736,799 | 2.77E-02 | 7.03E-03 | 0.396  | 39.648 | 0.458  | 45.762 | 0.106 | 10.541 | 1.995 | 0.081 | 8.081  | 1.551 | 0.151  | 15.122  | 1239_X | --             | Open Sea | Intergenic |
| chrX | 60,536,816 | 4.60E-02 | 7.93E-03 | 0.351  | 35.135 | 0.511  | 51.111 | 0.306 | 30.565 | 6.113 | 0.205 | 20.496 | 4.099 | 0.160  | 15.976  | 1239_X | --             | Open Sea | Intergenic |
| chrX | 62,152,711 | 2.23E-02 | 0.82E-02 | 0.807  | 80.682 | 0.922  | 92.157 | 0.102 | 10.183 | 2.037 | 0.048 | 4.822  | 0.964 | 0.115  | 11.475  | 1240_X | --             | Open Sea | Intergenic |
| chrX | 62,152,976 | 3.93E-02 | 8.65E-01 | 0.444  | 44.444 | 0.683  | 68.293 | 0.212 | 21.215 | 4.243 | 0.208 | 20.801 | 4.120 | 0.238  | 23.848  | 1240_X | --             | Open Sea | Intergenic |
| chrX | 63,910,769 | 3.79E-03 | 2.74E-02 | 0.385  | 38.463 | 0.196  | 19.614 | 0.385 | 19.579 | 3.816 | 0.199 | 19.919 | 8.051 | 0.281  | 28.055  | 1241_X | --             | Open Sea | Intergenic |
| chrX | 63,910,983 | 1.74E-02 | 4.07E-02 | 0.526  | 52.577 | 0.683  | 68.254 | 0.182 | 18.237 | 1.647 | 0.086 | 6.556  | 1.311 | 0.157  | 15.677  | 1241_X | --             | Open Sea | Intergenic |
| chrX | 64,303,209 | 4.01E-02 | 3.55E-01 | 0.826  | 82.609 | 0.630  | 63.043 | 0.052 | 5.202  | 3.040 | 0.090 | 9.048  | 1.810 | -0.196 | -19.565 | 1242_X | --             | Open Sea | Intergenic |
| chrX | 64,303,959 | 1.75E-02 | 1.75E-02 | 0.686  | 68.571 | 0.917  | 91.667 | 0.190 | 19.860 | 3.792 | 0.068 | 6.790  | 1.358 | 0.231  | 23.095  | 1242_X | --             | Open Sea | Intergenic |
| chrX | 65,687,824 | 2.73E-02 | 0.75E-02 | 0.672  | 67.200 | 0.540  | 54.000 | 0.161 | 16.242 | 0.399 | 0.399 | 0.742  | 0.742 | 0.120  | 12.043  | 1243_X | --             | Open Sea | Intergenic |
| chrX | 65,687,908 | 2.87E-02 | 7.61E-04 | 0.605  | 60.526 | 0.732  | 73.203 | 0.087 | 8.721  | 1.744 | 0.131 | 13.134 | 2.627 | 0.127  | 12.676  | 1243_X | AT             | Open Sea | Intergenic |
| chrX | 65,688,065 | 2.73E-02 | 3.58E-05 | 0.375  | 37.500 | 0.539  | 53.901 | 0.147 | 14.727 | 2.945 | 0.158 | 15.761 | 3.152 | 0.164  | 16.401  | 1243_X | cc             | Open Sea | Intergenic |
| chrX | 65,717,872 | 3.38E-02 | 3.38E-02 | 0.313  | 31.250 | 0.619  | 61.905 | 0.216 | 21.608 | 4.322 | 0.215 | 21.474 | 4.295 | 0.307  | 30.655  | 1244_X | CG nearby      | Open Sea | Intergenic |
| chrX | 65,718,401 | 3.13E-02 | 3.13E-02 | 0.485  | 48.500 | 0.205  | 20.500 | 0.171 | 17.087 | 1.204 | 0.087 | 1.204  | 0.717 | 0.717  | 7.171   | 1244_X | CG nearby      | Open Sea | Intergenic |
| chrX | 66,553,724 | 1.30E-03 | 1.09E-02 | 0.576  | 57.576 | 0.841  | 84.127 | 0.125 | 12.494 | 2.499 | 0.077 | 7.734  | 1.547 | 0.266  | 26.551  | 1245_X | AA             | Open Sea | Intergenic |
| chrX | 66,553,794 | 6.34E-03 | 1.97E-03 | 0.618  | 61.765 | 0.878  | 87.755 | 0.286 | 28.553 | 5.711 | 0.111 | 11.059 | 2.212 | 0.260  | 25.990  | 1245_X | Check manually | Open Sea | Intergenic |
| chrX | 68,166,122 | 2.78E-02 | 1.51E-01 | 0.742  | 74.242 | 0.887  | 88.732 | 0.159 | 15.899 | 3.180 | 0.060 | 6.030  | 1.206 | 0.145  | 14.490  | 1246_X | --             | Open Sea | Intergenic |
| chrX | 68,166,325 | 6.79E-03 | 1.63E-02 | 0.363  | 36.265 | 0.851  | 85.136 | 0.263 | 26.293 | 5.093 | 0.297 | 5.093  | 1.919 | 0.181  | 18.170  | 1246_X | --             | Open Sea | Intergenic |
| chrX | 68,166,496 | 4.29E-02 | 1.61E-03 | 0.863  | 86.275 | 0.685  | 68.519 | 0.079 | 7.891  | 1.578 | 0.223 | 22.334 | 4.467 | 0.178  | 17.756  | 1246_X | --             | Open Sea | Intergenic |
| chrX | 68,193,277 | 3.66E-02 | 7.42E-03 | 0.516  | 51.634 | 0.636  | 63.636 | 0.245 | 24.469 | 4.894 | 0.051 | 5.089  | 1.818 | 0.120  | 12.002  | 1247_X | --             | Open Sea | Intergenic |
| chrX | 68,193,397 | 4.72E-02 | 7.42E-03 | 0.582  | 58.209 | 0.746  | 74.603 | 0.126 | 12.554 | 2.511 | 0.140 | 14.005 | 2.801 | 0.164  | 16.394  | 1247_X | --             | Open Sea | Intergenic |
| chrX | 68,194,218 | 4.29E-02 | 4.29E-02 | 0.261  | 26.081 | 0.275  | 27.515 | 0.275 | 27.515 | 3.862 | 0.165 | 1.652  | 0.305 | 0.305  | 3.053   | 1247_X | --             | Open Sea | Intergenic |
| chrX | 68,301,204 | 2.74E-02 | 2.10E-02 | 0.679  | 67.949 | 0.829  | 82.927 | 0.188 | 18.792 | 3.758 | 0.096 | 9.575  | 1.915 | 0.150  | 14.978  | 1248_X | TT             | Open Sea | Intergenic |
| chrX | 68,301,206 | 2.14E-02 | 2.10E-02 | 0.714  | 71.429 | 0.864  | 86.420 | 0.089 | 8.914  | 1.783 | 0.060 | 6.035  | 1.207 | 0.150  | 14.991  | 1248_X | TT             | Open Sea | Intergenic |
| chrX | 68,862,122 | 2.08E-02 | 2.08E-02 | 0.708  | 70.796 | 0.847  | 84.746 | 0.132 | 13.241 | 2.648 | 0.150 | 15.029 | 3.006 | 0.139  | 13.949  | 1249_X | --             | Open Sea | Intergenic |
| chrX | 68,863,146 | 2.98E-03 | 2.98E-01 | 0.936  | 93.590 | 0.859  | 85.940 | 0.388 | 38.833 | 7.765 | 0.108 | 10.833 | 2.167 | 0.241  | 24.145  | 1249_X | --             | Open Sea | Intergenic |
| chrX | 70,038,146 | 9.54E-03 | 4.32E-01 | 0.857  | 85.714 | 0.614  | 61.364 | 0.125 | 12.537 | 2.507 | 0.115 | 11.492 | 2.298 | -0.244 | -24.351 | 1250_X | --             | Open Sea | Intergenic |
| chrX | 70,038,894 | 3.99E-02 | 3.99E-02 | 0.426  | 42.647 | 0.556  | 55.639 | 0.094 | 9.401  | 1.880 | 0.067 | 6.687  | 1.337 | 0.130  | 12.992  | 1250_X | --             | Open Sea | Intergenic |
| chrX | 71,645,122 | 4.02E-02 | 2.96E-04 | 0.400  | 40.000 | 0.736  | 73.585 | 0.299 | 29.914 | 5.983 | 0.167 | 16.681 | 3.336 | 0.336  | 33.585  | 1251_X | --             | Open Sea | Intergenic |
| chrX | 71,645,197 | 1.25E-02 | 2.96E-04 | 0.800  | 80.000 | 0.500  | 50.000 | 0.107 | 10.702 | 2.140 | 0.337 | 3.337  | 0.300 | -0.300 | -30.000 | 1251_X | --             | Open Sea | Intergenic |
| chrX | 72,565,678 | 1.94E-02 | 1.94E-02 | 0.455  | 45.455 | 0.765  | 76.471 | 0.260 | 26.021 | 5.204 | 0.219 | 21.948 | 4.390 | 0.310  | 31.016  | 1252_X | --             | Open Sea | Intergenic |
| chrX | 72,566,280 | 7.83E-03 | 7.83E-03 | 0.580  | 57.955 | 0.708  | 72.807 | 0.080 | 7.992  | 1.598 | 0.093 | 9.329  | 1.866 | 0.208  |         |        |                |          |            |



|      |             |           |          |       |        |       |        |       |        |       |        |        |        |        |         |        |    |          |            |
|------|-------------|-----------|----------|-------|--------|-------|--------|-------|--------|-------|--------|--------|--------|--------|---------|--------|----|----------|------------|
| chXK | 106,408,175 | 1.75E-02  | 1.96E-02 | 0.464 | 46.377 | 0.667 | 66.667 | 0.133 | 13.287 | 2.657 | 0.126  | 12.633 | 2.527  | 0.203  | 20.290  | 1277_X | -- | Open Sea | Intergenic |
| chXK | 106,408,336 | 1.20E-02  | 1.96E-02 | 0.848 | 84.848 | 0.662 | 66.154 | 0.086 | 8.621  | 1.724 | 0.127  | 12.706 | 2.541  | -0.187 | -18.695 | 1277_X | -- | Open Sea | Intergenic |
| chXK | 106,605,483 | 4.937E-02 | 8.67E-02 | 0.843 | 87.568 | 0.676 | 67.668 | 0.093 | 9.671  | 0.250 | 0.124  | 12.492 | 2.547  | 0.140  | 14.007  | 1278_X | ag | Open Sea | Intergenic |
| chXK | 106,605,990 | 2.95E-02  | 6.03E-01 | 0.721 | 72.093 | 0.475 | 47.500 | 0.181 | 18.143 | 3.629 | 0.261  | 26.090 | 5.218  | -0.246 | -24.593 | 1278_X | -- | Open Sea | Intergenic |
| chXK | 107,555,720 | 4.30E-02  | 2.64E-02 | 0.710 | 70.968 | 0.524 | 52.381 | 0.183 | 18.288 | 3.658 | 0.107  | 10.720 | 2.144  | -0.186 | -18.587 | 1279_X | -- | Open Sea | Intergenic |
| chXK | 107,556,432 | 4.77E-02  | 7.81E-02 | 0.743 | 74.286 | 0.414 | 41.379 | 0.242 | 24.165 | 4.833 | 0.371  | 37.081 | 7.416  | -0.329 | -32.906 | 1279_X | -- | Open Sea | Intergenic |
| chXK | 107,667,200 | 4.49E-02  | 5.89E-02 | 0.656 | 65.659 | 0.686 | 68.000 | 0.082 | 8.905  | 0.137 | 13.682 | 0.127  | 12.686 | 0.234  | 22.375  | 1280_X | TG | Open Sea | Intergenic |
| chXK | 107,667,381 | 1.16E-02  | 2.83E-02 | 0.614 | 61.364 | 0.861 | 86.111 | 0.210 | 21.023 | 4.205 | 0.091  | 9.080  | 1.812  | 0.247  | 24.747  | 1280_X | -- | Open Sea | Intergenic |
| chXK | 108,547,598 | 6.85E-03  | 4.65E-03 | 0.625 | 62.500 | 0.261 | 26.087 | 0.185 | 18.540 | 3.708 | 0.234  | 23.395 | 4.679  | -0.364 | -36.413 | 1281_X | -- | Open Sea | Intergenic |
| chXK | 108,547,612 | 3.70E-02  | 4.65E-03 | 0.704 | 70.370 | 0.400 | 40.000 | 0.378 | 37.829 | 7.568 | 0.267  | 26.677 | 5.335  | -0.304 | -30.370 | 1281_X | -- | Open Sea | Intergenic |
| chXK | 110,367,437 | 4.90E-02  | 4.98E-02 | 0.844 | 84.400 | 0.502 | 50.300 | 0.154 | 15.409 | 3.154 | 0.150  | 15.130 | 4.098  | -0.154 | -15.248 | 1282_X | -- | Open Sea | Intergenic |
| chXK | 110,367,635 | 2.63E-02  | 2.15E-02 | 0.850 | 85.000 | 0.552 | 55.172 | 0.126 | 12.638 | 2.528 | 0.224  | 22.361 | 4.472  | -0.298 | -29.828 | 1282_X | -- | Open Sea | Intergenic |
| chXK | 111,661,723 | 8.45E-03  | 1.70E-02 | 0.582 | 58.182 | 0.800 | 80.000 | 0.104 | 10.358 | 2.072 | 0.090  | 8.987  | 1.797  | 0.218  | 21.818  | 1283_X | -- | Open Sea | Intergenic |
| chXK | 111,662,208 | 1.61E-02  | 1.61E-02 | 0.647 | 64.706 | 0.397 | 39.655 | 0.186 | 18.590 | 3.718 | 0.146  | 14.649 | 2.930  | -0.251 | -25.051 | 1283_X | ag | Open Sea | Intergenic |
| chXK | 111,919,071 | 3.79E-02  | 3.21E-01 | 0.617 | 61.700 | 0.769 | 76.603 | 0.242 | 24.169 | 4.834 | 0.142  | 14.170 | 2.933  | 0.233  | 23.295  | 1284_X | -- | Open Sea | Intergenic |
| chXK | 111,919,078 | 6.88E-03  | 3.21E-01 | 0.462 | 46.154 | 0.791 | 79.070 | 0.261 | 26.077 | 5.215 | 0.158  | 15.752 | 3.150  | 0.329  | 32.916  | 1284_X | -- | Open Sea | Intergenic |
| chXK | 112,103,037 | 2.09E-02  | 2.11E-01 | 0.200 | 20.000 | 0.360 | 36.047 | 0.119 | 11.919 | 2.384 | 0.084  | 8.376  | 1.675  | 0.160  | 16.047  | 1285_X | -- | Open Sea | Intergenic |
| chXK | 112,103,807 | 6.65E-03  | 5.89E-02 | 0.630 | 63.043 | 0.326 | 32.558 | 0.189 | 18.880 | 3.776 | 0.189  | 18.370 | 3.674  | -0.305 | -30.485 | 1285_X | -- | Open Sea | Intergenic |
| chXK | 112,573,723 | 3.27E-03  | 3.45E-04 | 0.603 | 60.274 | 0.778 | 77.778 | 0.191 | 19.108 | 3.822 | 0.112  | 11.152 | 2.232  | 0.175  | 17.504  | 1286_X | -- | Open Sea | Intergenic |
| chXK | 112,573,739 | 1.71E-02  | 3.45E-04 | 0.503 | 50.323 | 0.642 | 64.238 | 0.226 | 22.560 | 4.512 | 0.136  | 13.591 | 2.718  | 0.139  | 13.916  | 1286_X | -- | Open Sea | Intergenic |
| chXK | 113,809,633 | 4.54E-02  | 8.96E-02 | 0.852 | 85.185 | 0.629 | 62.857 | 0.144 | 14.447 | 2.889 | 0.210  | 21.028 | 4.206  | -0.223 | -22.328 | 1287_X | TG | Open Sea | Intergenic |
| chXK | 113,810,072 | 3.71E-02  | 3.71E-02 | 0.451 | 45.116 | 0.840 | 84.000 | 0.169 | 16.895 | 3.377 | 0.099  | 9.939  | 1.968  | 0.189  | 18.804  | 1287_X | CT | Open Sea | Intergenic |
| chXK | 114,316,592 | 1.37E-02  | 1.35E-04 | 0.380 | 38.000 | 0.660 | 66.000 | 0.193 | 19.282 | 3.852 | 0.215  | 21.544 | 4.309  | 0.280  | 28.000  | 1288_X | -- | Open Sea | Intergenic |
| chXK | 114,316,603 | 1.27E-02  | 1.35E-04 | 0.646 | 64.583 | 0.860 | 86.000 | 0.310 | 30.973 | 6.195 | 0.094  | 9.398  | 1.880  | 0.214  | 21.417  | 1288_X | -- | Open Sea | Intergenic |
| chXK | 115,119,338 | 3.89E-02  | 3.41E-01 | 0.407 | 40.741 | 0.714 | 71.429 | 0.153 | 15.278 | 3.056 | 0.378  | 37.815 | 7.563  | 0.307  | 30.688  | 1289_X | -- | Open Sea | Intergenic |
| chXK | 115,119,363 | 4.32E-02  | 5.81E-01 | 0.753 | 75.325 | 0.892 | 88.235 | 0.121 | 12.070 | 2.414 | 0.088  | 8.761  | 1.752  | 0.129  | 12.911  | 1289_X | -- | Open Sea | Intergenic |
| chXK | 115,202,282 | 2.11E-02  | 2.75E-03 | 0.733 | 73.171 | 0.875 | 87.500 | 0.202 | 20.072 | 4.014 | 0.079  | 7.892  | 1.502  | 0.140  | 14.329  | 1290_X | -- | Open Sea | Intergenic |
| chXK | 115,202,352 | 4.18E-03  | 5.18E-03 | 0.446 | 44.663 | 0.724 | 72.414 | 0.062 | 6.222  | 1.244 | 0.098  | 0.793  | 1.959  | 0.278  | 27.771  | 1290_X | -- | Open Sea | Intergenic |
| chXK | 116,755,607 | 4.84E-02  | 4.84E-02 | 0.614 | 61.404 | 0.829 | 82.857 | 0.249 | 24.850 | 4.970 | 0.101  | 10.131 | 2.026  | 0.215  | 21.454  | 1291_X | -- | Open Sea | Intergenic |
| chXK | 120,133,815 | 2.21E-02  | 2.21E-02 | 0.418 | 41.818 | 0.714 | 71.471 | 0.181 | 18.069 | 3.715 | 0.095  | 9.502  | 2.161  | -0.262 | -26.466 | 1291_X | -- | Open Sea | Intergenic |
| chXK | 120,133,885 | 4.50E-02  | 6.73E-03 | 0.424 | 42.373 | 0.638 | 63.768 | 0.214 | 21.422 | 4.284 | 0.194  | 19.449 | 3.890  | 0.214  | 21.395  | 1292_X | -- | Open Sea | Intergenic |
| chXK | 120,133,822 | 1.69E-02  | 6.73E-03 | 0.415 | 41.538 | 0.620 | 61.972 | 0.088 | 8.771  | 1.754 | 0.111  | 11.061 | 2.212  | 0.204  | 20.433  | 1292_X | -- | Open Sea | Intergenic |
| chXK | 120,133,846 | 1.70E-02  | 6.73E-03 | 0.500 | 50.000 | 0.682 | 68.182 | 0.119 | 11.853 | 2.371 | 0.167  | 16.697 | 3.339  | 0.182  | 18.182  | 1292_X | -- | Open Sea | Intergenic |
| chXK | 120,455,294 | 3.87E-03  | 1.57E-04 | 0.600 | 60.000 | 0.317 | 31.667 | 0.040 | 4.000  | 0.149 | 0.097  | 0.184  | 2.962  | -0.383 | -38.333 | 1293_X | CT | Open Sea | Intergenic |
| chXK | 120,455,393 | 4.51E-02  | 1.57E-04 | 0.857 | 85.714 | 0.619 | 61.905 | 0.097 | 9.690  | 1.938 | 0.244  | 24.393 | 4.879  | -0.238 | -23.810 | 1293_X | -- | Open Sea | Intergenic |
| chXK | 120,503,185 | 3.57E-02  | 2.87E-01 | 0.576 | 57.576 | 0.821 | 82.143 | 0.229 | 22.938 | 4.588 | 0.154  | 15.419 | 3.084  | 0.246  | 24.567  | 1294_X | AG | Open Sea | Intergenic |
| chXK | 120,504,082 | 2.40E-02  | 1.29E-01 | 0.704 | 70.408 | 0.838 | 83.838 | 0.141 | 14.060 | 2.810 | 0.075  | 7.530  | 1.506  | 0.134  | 13.430  | 1294_X | -- | Open Sea | Intergenic |
| chXK | 120,598,596 | 2.05E-02  | 2.05E-02 | 0.545 | 54.545 | 0.340 | 34.083 | 0.126 | 12.585 | 2.129 | 0.092  | 9.212  | 2.512  | 0.239  | 23.978  | 1295_X | -- | Open Sea | Intergenic |
| chXK | 120,599,302 | 2.05E-02  | 2.05E-02 | 0.167 | 16.667 | 0.403 | 40.323 | 0.148 | 14.809 | 2.562 | 0.158  | 15.828 | 2.366  | 0.237  | 23.656  | 1295_X | -- | Open Sea | Intergenic |
| chXK | 120,682,355 | 5.35E-03  | 5.35E-03 | 0.711 | 71.111 | 0.333 | 33.333 | 0.350 | 35.018 | 7.004 | 0.070  | 7.014  | 1.403  | -0.378 | -37.778 | 1296_X | TA | Open Sea | Intergenic |
| chXK | 120,683,013 | 2.32E-02  | 2.32E-02 | 0.455 | 45.455 | 0.727 | 72.727 | 0.226 | 22.637 | 4.527 | 0.187  | 18.670 | 3.734  | 0.273  | 27.273  | 1296_X | CT | Open Sea | Intergenic |
| chXK | 121,110,552 | 3.21E-02  | 3.21E-02 | 0.461 | 46.099 | 0.481 | 48.081 | 0.047 | 4.681  | 0.142 | 0.096  | 0.142  | 1.841  | 0.181  | 18.401  | 1297_X | -- | Open Sea | Intergenic |
| chXK | 121,411,048 | 3.05E-02  | 4.56E-02 | 0.563 | 56.250 | 0.742 | 74.242 | 0.053 | 5.294  | 1.059 | 0.161  | 16.137 | 3.227  | 0.180  | 17.992  | 1297_X | -- | Open Sea | Intergenic |
| chXK | 122,335,719 | 3.59E-02  | 1.58E-01 | 0.541 | 54.098 | 0.764 | 76.364 | 0.161 | 16.106 | 3.221 | 0.106  | 10.551 | 2.110  | 0.223  | 22.265  | 1298_X | -- | Open Sea | Intergenic |
| chXK | 122,336,045 | 7.14E-03  | 7.75E-02 | 0.875 | 87.500 | 0.648 | 64.815 | 0.086 | 8.620  | 1.724 | 0.101  | 10.100 | 2.020  | -0.227 | -22.685 | 1298_X | -- | Open Sea | Intergenic |
| chXK | 127,108,036 | 3.09E-03  | 3.09E-03 | 0.767 | 76.723 | 0.396 | 39.600 | 0.086 | 8.620  | 1.724 | 0.101  | 10.100 | 2.020  | -0.227 | -22.685 | 1299_X | -- | Open Sea | Intergenic |
| chXK | 127,109,202 | 4.56E-02  | 4.56E-02 | 0.767 | 76.744 | 0.543 | 54.286 | 0.126 | 12.556 | 2.511 | 0.323  | 32.294 | 6.459  | -0.258 | -25.458 | 1299_X | -- | Open Sea | Intergenic |
| chXK | 127,712,135 | 1.36E-02  | 1.64E-02 | 0.865 | 86.486 | 0.630 | 63.043 | 0.074 | 7.391  | 1.478 | 0.085  | 8.466  | 1.293  | -0.234 | -23.443 | 1300_X | -- | Open Sea | Intergenic |
| chXK | 127,712,867 | 3.53E-02  | 3.53E-02 | 0.543 | 54.348 | 0.759 | 75.926 | 0.295 | 29.487 | 5.897 | 0.179  | 17.336 | 3.587  | 0.216  | 21.578  | 1300_X | -- | Open Sea | Intergenic |
| chXK | 127,736,711 | 4.89E-02  | 4.28E-02 | 0.653 | 65.300 | 0.848 | 84.848 | 0.280 | 27.974 | 5.595 | 0.111  | 11.090 | 2.218  | 0.149  | 13.943  | 1301_X | -- | Open Sea | Intergenic |
| chXK | 127,737,319 | 2.96E-02  | 2.96E-02 | 0.641 | 64.113 | 0.744 | 74.419 | 0.081 | 8.075  | 1.615 | 0.102  | 10.179 | 2.036  | 0.103  | 10.306  | 1301_X | -- | Open Sea | Intergenic |
| chXK | 128,356,526 | 9.13E-03  | 8.09E-04 | 0.677 | 67.742 | 0.892 | 89.231 | 0.172 | 17.222 | 3.444 | 0.198  | 19.808 | 3.962  | 0.215  | 21.489  | 1302_X | -- | Open Sea | Intergenic |
| chXK | 128,356,609 | 1.71E-02  | 7.35E-04 | 0.143 | 14.286 | 0.306 | 30.588 | 0.077 | 7.674  | 1.535 | 0.103  | 10.279 | 2.056  | 0.163  | 16.303  | 1302_X | -- | Open Sea | Intergenic |
| chXK | 128,357,071 | 2.83E-02  | 5.00E-02 | 0.463 | 46.357 | 0.852 | 85.283 | 0.167 | 16.733 | 3.477 | 0.080  | 8.080  | 1.597  | 0.282  | 28.853  | 1303_X | -- | Open Sea | Intergenic |
| chXK | 128,357,631 | 1.06E-02  | 5.00E-02 | 0.686 | 68.651 | 0.375 | 37.500 | 0.157 | 15.727 | 3.145 | 0.078  | 7.817  | 1.563  | 0.189  | 18.929  | 1303_X | -- | Open Sea | Intergenic |
| chXK | 128,498,607 | 3.80E-02  | 1.78E-02 | 0.667 | 66.667 | 0.450 | 45.000 | 0.118 | 11.760 | 2.352 | 0.170  | 17.619 | 3.524  | -0.217 | -21.667 | 1304_X | -- | Open Sea | Intergenic |
| chXK | 128,498,704 | 3.84E-03  | 3.84E-03 | 0.523 | 52.273 | 0.833 | 83.333 | 0.203 | 20.334 | 4.067 | 0.085  | 8.485  | 1.697  | 0.311  | 31.061  | 1304_X | CT | Open Sea | Intergenic |
| chXK | 131,455,183 | 9.32E-02  | 9.32E-02 | 0.714 | 71.429 | 0.886 | 88.608 | 0.152 | 15.233 | 3.053 | 0.083  | 8.376  | 1.675  | 0.160  | 16.047  | 1305_X | ca | Open Sea | Intergenic |
| chXK | 131,455,896 | 1.77E-03  | 1.06E-02 | 0.382 | 38.235 | 0.750 | 75.000 | 0.196 | 19.598 | 3.920 | 0.128  | 12.775 | 2.555  | 0.368  | 36.765  | 1305_X | AG | Open Sea | Intergenic |
| chXK | 137,562,360 | 1.59E-03  | 1.05E    |       |        |       |        |       |        |       |        |        |        |        |         |        |    |          |            |



|      |             |          |          |       |        |       |        |       |        |       |       |        |       |       |        |        |    |          |             |         |
|------|-------------|----------|----------|-------|--------|-------|--------|-------|--------|-------|-------|--------|-------|-------|--------|--------|----|----------|-------------|---------|
| chrX | 169,264,852 | 4.19E-02 | 2.03E-01 | 0.293 | 29.268 | 0.500 | 50.000 | 0.109 | 10.929 | 2.186 | 0.290 | 28.997 | 5.799 | 0.207 | 20.732 | 1328_X | -- | Open Sea | Intron 8/12 | Arhgap6 |
| chrX | 169,264,867 | 3.45E-02 | 2.03E-01 | 0.561 | 56.098 | 0.851 | 85.106 | 0.241 | 24.135 | 4.827 | 0.166 | 16.600 | 3.320 | 0.290 | 29.009 | 1328_X | -- | Open Sea | Intron 8/12 | Arhgap6 |
| chrX | 169,723,040 | 1.30E-02 | 2.06E-02 | 0.474 | 47.368 | 0.766 | 76.571 | 0.281 | 28.123 | 5.625 | 0.138 | 13.773 | 2.755 | 0.312 | 31.203 | 1329_X | -- | Open Sea | Intron 1/9  | Mid1    |
| chrX | 169,723,968 | 4.69E-02 | 4.05E-01 | 0.556 | 55.556 | 0.818 | 81.818 | 0.284 | 28.389 | 5.678 | 0.135 | 13.532 | 2.706 | 0.263 | 26.263 | 1329_X | -- | Open Sea | Intron 1/9  | Mid1    |
| chrY | 90,730,171  | 2.78E-02 | 3.38E-01 | 0.413 | 41.333 | 0.586 | 58.621 | 0.057 | 5.735  | 1.147 | 0.066 | 6.602  | 1.320 | 0.173 | 17.287 | 1330_Y | -- | S Shore  | Intergenic  |         |
| chrY | 90,730,641  | 1.38E-02 | 6.48E-02 | 0.600 | 60.000 | 0.860 | 86.047 | 0.210 | 21.009 | 4.202 | 0.090 | 8.977  | 1.795 | 0.280 | 28.047 | 1330_Y | -- | S Shore  | Intergenic  |         |











[illegible]



[illegible]











[illegible]



[illegible]



**Supplementary Table S7:** Top five KEGG pathways hits of differentially methylated and expressed genes in islets of diabetes-prone compared to diabetes-resistant animals (see Figure 5). Pathways are ranked by fold enrichment analysis.

| Category     | Term                     | Genes                                                | Number of genes | Fold Enrichment | unadjusted p-value |
|--------------|--------------------------|------------------------------------------------------|-----------------|-----------------|--------------------|
| KEGG_PATHWAY | Amphetamine addiction    | <i>Ddc, Adcy5, Grin1, Gria3, Gnas, Ppp3ca, Prka</i>  | 10              | 5.3             | 9.90E-05           |
| KEGG_PATHWAY | Long-term potentiation   | <i>Rps6ka3, Grin1, Crebbp, Rap1a, Rap1b, Ppp3</i>    | 9               | 4.8             | 5.00E-04           |
| KEGG_PATHWAY | Cocaine addiction        | <i>Ddc, Adcy5, Grin1, Gnas, Prkacb, Atf2</i>         | 6               | 4.3             | 1.20E-02           |
| KEGG_PATHWAY | Insulin secretion        | <i>Kcnma1, Gcg, Adcy5, Gnas, Prkacb, Cacna1c,</i>    | 10              | 4.1             | 6.70E-04           |
| KEGG_PATHWAY | ECM-receptor interaction | <i>Lama2, Itga9, Lama4, Tnxb, Col3a1, Itga1, Col</i> | 10              | 4               | 7.90E-04           |
| KEGG_PATHWAY | Renin secretion          | <i>Kcnma1, Adcy5, Gucy1a3, Gnas, Pde3a, Ppp3</i>     | 8               | 4               | 3.70E-03           |



**Supplementary Table S8:** Prospective association between T2D and DNA methylation in blood cells of participants in a nested case-control subcohort from EPIC-Potsdam study. All CpG sites used in the analysis are included in the table. Methylation profiles were assessed by 850K arrays.

| CpG site   | Gene symbol  | Chromosome | Gene region | Odds ratio | 95% Confidence interval | unadjusted p-value |
|------------|--------------|------------|-------------|------------|-------------------------|--------------------|
| cg25381383 | MEIS2        | chr15      | TSS1500     | 0.33       | (0.2; 0.55)             | 1.9E-05            |
| cg11995041 | WWOX         | chr16      | Body        | 2.36       | (1.5; 3.71)             | 2.2E-04            |
| cg19746591 | TAOK3        | chr12      | Body        | 3.18       | (1.7; 5.94)             | 2.9E-04            |
| cg09587151 | ATF7         | chr12      | 5'UTR       | 0.52       | (0.36; 0.74)            | 3.2E-04            |
| cg09587151 | ATF7         | chr12      | TSS200      | 0.52       | (0.36; 0.74)            | 3.2E-04            |
| cg09587151 | ATF7         | chr12      | Body        | 0.52       | (0.36; 0.74)            | 3.2E-04            |
| cg17429772 | PTPRN2       | chr7       | Body        | 2.04       | (1.38; 3.02)            | 3.3E-04            |
| cg17223866 | ERI3         | chr1       | Body        | 0.51       | (0.35; 0.74)            | 3.9E-04            |
| cg00353899 | TNFRSF11A    | chr18      | Body        | 2.69       | (1.55; 4.64)            | 4.0E-04            |
| cg07403233 | PTPRN2       | chr7       | Body        | 2.14       | (1.4; 3.27)             | 4.2E-04            |
| cg11025469 | PTPRN2       | chr7       | Body        | 2.04       | (1.37; 3.05)            | 4.7E-04            |
| cg22695921 | ZBTB20       | chr3       | Body        | 0.44       | (0.27; 0.7)             | 5.3E-04            |
| cg22695921 | ZBTB20       | chr3       | 3'UTR       | 0.44       | (0.27; 0.7)             | 5.3E-04            |
| cg16111244 | AKAP13       | chr15      | Body        | 2.39       | (1.46; 3.92)            | 5.5E-04            |
| cg01703291 | PDE8A        | chr15      | Body        | 2.08       | (1.37; 3.16)            | 6.1E-04            |
| cg22991963 | ERI3         | chr1       | Body        | 0.53       | (0.37; 0.76)            | 7.0E-04            |
| cg09983370 | ATP8A1       | chr4       | Body        | 0.56       | (0.39; 0.78)            | 7.3E-04            |
| cg19055919 | CACNA1C      | chr12      | Body        | 2.09       | (1.36; 3.22)            | 8.1E-04            |
| cg24236085 | CSMD2        | chr1       | TSS200      | 0.56       | (0.39; 0.79)            | 8.8E-04            |
| cg06027691 | CTDSPL       | chr3       | Body        | 0.52       | (0.36; 0.77)            | 8.9E-04            |
| cg02552307 | PTPRU        | chr1       | Body        | 2.34       | (1.41; 3.87)            | 9.3E-04            |
| cg10175632 | WWOX         | chr16      | Body        | 0.54       | (0.37; 0.78)            | 9.5E-04            |
| cg26871576 | NOL4L        | chr20      | Body        | 1.97       | (1.32; 2.95)            | 1.0E-03            |
| cg03507228 | CHD6         | chr20      | TSS200      | 1.99       | (1.31; 3.02)            | 1.2E-03            |
| cg11075883 | CNTNAP2      | chr7       | Body        | 0.3        | (0.15; 0.62)            | 1.2E-03            |
| cg05593618 | LOC100130933 | chr17      | Body        | 1.91       | (1.29; 2.82)            | 1.3E-03            |
| cg05593618 | RECQL5       | chr17      | Body        | 1.91       | (1.29; 2.82)            | 1.3E-03            |
| cg07088328 | DDHD2        | chr8       | 5'UTR       | 0.56       | (0.39; 0.8)             | 1.3E-03            |
| cg07088328 | DDHD2        | chr8       | 1stExon     | 0.56       | (0.39; 0.8)             | 1.3E-03            |
| cg07088328 | DDHD2        | chr8       | TSS1500     | 0.56       | (0.39; 0.8)             | 1.3E-03            |
| cg13762595 | PHACTR1      | chr6       | Body        | 0.54       | (0.38; 0.79)            | 1.3E-03            |
| cg26425766 | PTPRN2       | chr7       | Body        | 0.58       | (0.42; 0.81)            | 1.3E-03            |
| cg06620266 | TXNDC9       | chr2       | 5'UTR       | 0.57       | (0.4; 0.8)              | 1.4E-03            |
| cg02358382 | PTPRN2       | chr7       | Body        | 0.55       | (0.38; 0.8)             | 1.5E-03            |
| cg09234312 | COL5A2       | chr2       | Body        | 1.8        | (1.25; 2.6)             | 1.7E-03            |
| cg04136484 | TNRC6B       | chr22      | Body        | 1.83       | (1.26; 2.67)            | 1.7E-03            |
| cg06471042 | MEIS2        | chr15      | 5'UTR       | 0.42       | (0.25; 0.73)            | 1.8E-03            |
| cg06471042 | MEIS2        | chr15      | TSS200      | 0.42       | (0.25; 0.73)            | 1.8E-03            |
| cg06471042 | MEIS2        | chr15      | TSS1500     | 0.42       | (0.25; 0.73)            | 1.8E-03            |
| cg12159230 | TAOK3        | chr12      | 5'UTR       | 0.54       | (0.37; 0.79)            | 1.8E-03            |
| cg25947619 | AKAP13       | chr15      | Body        | 0.52       | (0.34; 0.79)            | 1.9E-03            |
| cg27536708 | GOLT1B       | chr12      | 5'UTR       | 0.37       | (0.2; 0.69)             | 1.9E-03            |
| cg27536708 | GOLT1B       | chr12      | 1stExon     | 0.37       | (0.2; 0.69)             | 1.9E-03            |
| cg27536708 | RECQL        | chr12      | TSS1500     | 0.37       | (0.2; 0.69)             | 1.9E-03            |
| cg01209914 | PTPRU        | chr1       | Body        | 1.9        | (1.27; 2.86)            | 1.9E-03            |
| cg11541124 | SRSF10       | chr1       | Body        | 1.95       | (1.28; 2.98)            | 2.1E-03            |
| cg11541124 | SRSF10       | chr1       | ExonBnd     | 1.95       | (1.28; 2.98)            | 2.1E-03            |
| cg10631304 | TNFRSF1B     | chr1       | Body        | 1.9        | (1.26; 2.85)            | 2.1E-03            |
| cg25625815 | CUX2         | chr12      | Body        | 1.98       | (1.28; 3.07)            | 2.2E-03            |
| cg08515646 | PTPRN2       | chr7       | Body        | 0.5        | (0.33; 0.78)            | 2.2E-03            |
| cg19744528 | PTPRN2       | chr7       | Body        | 0.6        | (0.44; 0.84)            | 2.3E-03            |
| cg08599635 | WWOX         | chr16      | Body        | 2.04       | (1.29; 3.22)            | 2.3E-03            |
| cg19463796 | PTPRN2       | chr7       | Body        | 1.62       | (1.19; 2.2)             | 2.3E-03            |
| cg00736375 | ZBTB20       | chr3       | Body        | 0.58       | (0.41; 0.82)            | 2.4E-03            |



|            |           |       |         |      |              |         |
|------------|-----------|-------|---------|------|--------------|---------|
| cg00736375 | ZBTB20    | chr3  | 5'UTR   | 0.58 | (0.41; 0.82) | 2.4E-03 |
| cg14276730 | CHD6      | chr20 | Body    | 0.56 | (0.38; 0.81) | 2.4E-03 |
| cg21325941 | AKAP13    | chr15 | TSS1500 | 0.6  | (0.44; 0.84) | 2.5E-03 |
| cg00591353 | CDH13     | chr16 | Body    | 0.34 | (0.17; 0.68) | 2.5E-03 |
| cg18427465 | FBXO34    | chr14 | TSS1500 | 0.57 | (0.39; 0.82) | 2.5E-03 |
| cg01068006 | PEX14     | chr1  | TSS200  | 0.62 | (0.46; 0.85) | 2.5E-03 |
| cg23953684 | TENM2     | chr5  | Body    | 1.93 | (1.26; 2.96) | 2.5E-03 |
| cg18278694 | CEP350    | chr1  | 5'UTR   | 0.16 | (0.05; 0.52) | 2.6E-03 |
| cg14277044 | RTN4RL1   | chr17 | Body    | 0.45 | (0.27; 0.76) | 2.6E-03 |
| cg09707140 | ARID1A    | chr1  | ExonBnd | 0.6  | (0.43; 0.84) | 2.8E-03 |
| cg09707140 | ARID1A    | chr1  | Body    | 0.6  | (0.43; 0.84) | 2.8E-03 |
| cg12111758 | CUX2      | chr12 | Body    | 0.62 | (0.46; 0.85) | 2.8E-03 |
| cg01511557 | ELAVL4    | chr1  | Body    | 1.79 | (1.22; 2.62) | 2.8E-03 |
| cg25735593 | ZBTB20    | chr3  | Body    | 0.48 | (0.3; 0.78)  | 2.8E-03 |
| cg25735593 | ZBTB20    | chr3  | 5'UTR   | 0.48 | (0.3; 0.78)  | 2.8E-03 |
| cg12005819 | CTDSPL    | chr3  | Body    | 2.2  | (1.31; 3.69) | 2.9E-03 |
| cg17748769 | PTPRN2    | chr7  | Body    | 0.55 | (0.37; 0.81) | 2.9E-03 |
| cg22487972 | TNFRSF1B  | chr1  | TSS1500 | 1.98 | (1.26; 3.12) | 2.9E-03 |
| cg25043477 | C11orf67  | chr11 | TSS1500 | 1.7  | (1.2; 2.41)  | 3.0E-03 |
| cg13580196 | PDE8A     | chr15 | Body    | 0.52 | (0.33; 0.8)  | 3.0E-03 |
| cg12526346 | ATF7IP    | chr12 | 5'UTR   | 0.56 | (0.38; 0.82) | 3.1E-03 |
| cg25923062 | TNRC6B    | chr22 | 5'UTR   | 2.2  | (1.3; 3.7)   | 3.1E-03 |
| cg02713721 | CDH13     | chr16 | 5'UTR   | 1.93 | (1.25; 2.97) | 3.2E-03 |
| cg02713721 | CDH13     | chr16 | Body    | 1.93 | (1.25; 2.97) | 3.2E-03 |
| cg00099393 | PTPRN2    | chr7  | Body    | 1.91 | (1.24; 2.94) | 3.2E-03 |
| cg00698295 | RECQL5    | chr17 | Body    | 1.78 | (1.21; 2.6)  | 3.2E-03 |
| cg11005229 | SGIP1     | chr1  | Body    | 0.45 | (0.26; 0.77) | 3.3E-03 |
| cg12999230 | ORC4      | chr2  | TSS1500 | 2    | (1.26; 3.18) | 3.3E-03 |
| cg12999230 | MBD5      | chr2  | 5'UTR   | 2    | (1.26; 3.18) | 3.3E-03 |
| cg05203917 | PDE8A     | chr15 | Body    | 1.78 | (1.21; 2.61) | 3.4E-03 |
| cg06150803 | TNFRSF19  | chr13 | TSS1500 | 0.59 | (0.42; 0.84) | 3.5E-03 |
| cg04212285 | PTPRN2    | chr7  | Body    | 1.72 | (1.19; 2.47) | 3.5E-03 |
| cg02278209 | FBXO38    | chr5  | Body    | 2.07 | (1.27; 3.39) | 3.6E-03 |
| cg05136628 | CDH13     | chr16 | 3'UTR   | 1.92 | (1.24; 2.97) | 3.6E-03 |
| cg17681277 | TNFRSF12A | chr16 | TSS200  | 0.54 | (0.36; 0.82) | 3.6E-03 |
| cg11517132 | PTPRN2    | chr7  | Body    | 1.78 | (1.21; 2.63) | 3.7E-03 |
| cg19297726 | NRXN1     | chr2  | Body    | 0.58 | (0.41; 0.84) | 3.8E-03 |
| cg07676349 | PTPRS     | chr19 | Body    | 1.75 | (1.2; 2.56)  | 3.8E-03 |
| cg25612405 | CREBBP    | chr16 | Body    | 1.8  | (1.21; 2.68) | 3.8E-03 |
| cg02230543 | PTPRN2    | chr7  | Body    | 0.55 | (0.37; 0.82) | 3.9E-03 |
| cg16409367 | MEIS2     | chr15 | TSS1500 | 0.47 | (0.29; 0.79) | 3.9E-03 |
| cg04979551 | CREBBP    | chr16 | Body    | 0.55 | (0.36; 0.82) | 3.9E-03 |
| cg00733324 | EIF2S1    | chr14 | Body    | 0.53 | (0.34; 0.82) | 4.3E-03 |
| cg11293572 | PTPRN2    | chr7  | Body    | 1.85 | (1.21; 2.83) | 4.3E-03 |
| cg17190864 | TNFRSF10B | chr8  | TSS200  | 0.59 | (0.42; 0.85) | 4.4E-03 |
| cg19899563 | SGIP1     | chr1  | TSS1500 | 0.62 | (0.44; 0.86) | 4.4E-03 |
| cg04217753 | DMXL2     | chr15 | Body    | 0.51 | (0.32; 0.81) | 4.4E-03 |
| cg00333583 | PDE8A     | chr15 | Body    | 0.57 | (0.39; 0.84) | 4.4E-03 |
| cg01370437 | PTPRN2    | chr7  | Body    | 1.79 | (1.2; 2.68)  | 4.4E-03 |
| cg27526736 | PDE8A     | chr15 | 5'UTR   | 1.94 | (1.23; 3.06) | 4.4E-03 |
| cg27526736 | PDE8A     | chr15 | Body    | 1.94 | (1.23; 3.06) | 4.4E-03 |
| cg03784829 | TAOK3     | chr12 | 5'UTR   | 0.57 | (0.39; 0.84) | 4.4E-03 |
| cg02641442 | MEX3A     | chr1  | TSS1500 | 1.9  | (1.22; 2.95) | 4.6E-03 |
| cg14953636 | CACNA1C   | chr12 | Body    | 2    | (1.24; 3.24) | 4.8E-03 |
| cg23427362 | CACNA1C   | chr12 | Body    | 1.7  | (1.17; 2.45) | 4.9E-03 |
| cg02001390 | PTPRS     | chr19 | 5'UTR   | 1.85 | (1.2; 2.83)  | 5.0E-03 |
| cg04872075 | FBXO31    | chr16 | Body    | 1.69 | (1.17; 2.45) | 5.0E-03 |
| cg09409457 | PTPRN2    | chr7  | Body    | 0.58 | (0.39; 0.85) | 5.1E-03 |
| cg26699755 | RTN4RL1   | chr17 | Body    | 0.58 | (0.4; 0.85)  | 5.1E-03 |
| cg08549648 | TENM2     | chr5  | Body    | 0.57 | (0.39; 0.85) | 5.1E-03 |
| cg16143506 | CNTNAP2   | chr7  | Body    | 2    | (1.23; 3.25) | 5.1E-03 |



|               |                  |       |         |      |              |         |
|---------------|------------------|-------|---------|------|--------------|---------|
| cg27365342    | <i>PHACTR1</i>   | chr6  | Body    | 1.94 | (1.22; 3.08) | 5.2E-03 |
| cg10705789    | <i>TDRP</i>      | chr8  | Body    | 1.88 | (1.21; 2.92) | 5.3E-03 |
| cg12767196    | <i>TNR</i>       | chr1  | 5'UTR   | 0.57 | (0.39; 0.85) | 5.4E-03 |
| cg20190112    | <i>TNFRSF10D</i> | chr8  | TSS1500 | 0.6  | (0.42; 0.86) | 5.5E-03 |
| cg15688583    | <i>UBE2E2</i>    | chr3  | Body    | 2.77 | (1.35; 5.7)  | 5.5E-03 |
| cg11436846    | <i>PHACTR1</i>   | chr6  | Body    | 1.83 | (1.19; 2.82) | 5.7E-03 |
| cg20723588    | <i>UBE2E2</i>    | chr3  | TSS1500 | 0.59 | (0.4; 0.86)  | 5.7E-03 |
| cg11628355    | <i>PTPRN2</i>    | chr7  | Body    | 1.6  | (1.15; 2.22) | 5.7E-03 |
| cg23344069    | <i>FBXO36</i>    | chr2  | Body    | 1.56 | (1.14; 2.15) | 5.7E-03 |
| cg15921461    | <i>PTPRN2</i>    | chr7  | Body    | 0.62 | (0.45; 0.87) | 5.7E-03 |
| cg23349322    | <i>PEX14</i>     | chr1  | Body    | 1.68 | (1.16; 2.44) | 5.8E-03 |
| cg23887345    | <i>PTPRN2</i>    | chr7  | Body    | 0.59 | (0.41; 0.86) | 5.8E-03 |
| cg08856946    | <i>CDH13</i>     | chr16 | Body    | 0.51 | (0.31; 0.82) | 5.8E-03 |
| cg26229968    | <i>DMXL2</i>     | chr15 | TSS1500 | 0.63 | (0.46; 0.88) | 5.8E-03 |
| cg05553474    | <i>NDUFA9</i>    | chr12 | TSS1500 | 0.62 | (0.44; 0.87) | 5.8E-03 |
| cg03305742    | <i>FBXO31</i>    | chr16 | Body    | 0.6  | (0.42; 0.86) | 5.8E-03 |
| cg03305742    | <i>FBXO31</i>    | chr16 | 5'UTR   | 0.6  | (0.42; 0.86) | 5.8E-03 |
| cg06678608    | <i>WWOX</i>      | chr16 | ExonBnd | 0.58 | (0.39; 0.85) | 5.9E-03 |
| cg06678608    | <i>WWOX</i>      | chr16 | Body    | 0.58 | (0.39; 0.85) | 5.9E-03 |
| cg12843697    | <i>CACNA1C</i>   | chr12 | Body    | 2.75 | (1.33; 5.66) | 6.2E-03 |
| cg26267259    | <i>PTPRN2</i>    | chr7  | Body    | 0.56 | (0.37; 0.85) | 6.3E-03 |
| cg11381171    | <i>NRXN1</i>     | chr2  | Body    | 0.46 | (0.27; 0.81) | 6.5E-03 |
| cg17423711    | <i>POU2F1</i>    | chr1  | 5'UTR   | 0.36 | (0.17; 0.75) | 6.5E-03 |
| cg17423711    | <i>POU2F1</i>    | chr1  | 1stExon | 0.36 | (0.17; 0.75) | 6.5E-03 |
| cg00044488    | <i>PTPRN2</i>    | chr7  | 1stExon | 0.54 | (0.34; 0.84) | 6.5E-03 |
| cg00044488    | <i>PTPRN2</i>    | chr7  | Body    | 0.54 | (0.34; 0.84) | 6.5E-03 |
| cg00044488    | <i>PTPRN2</i>    | chr7  | 5'UTR   | 0.54 | (0.34; 0.84) | 6.5E-03 |
| cg11326510    | <i>PTPRN2</i>    | chr7  | Body    | 1.61 | (1.14; 2.28) | 6.5E-03 |
| cg08444457    | <i>ATF7IP2</i>   | chr16 | 5'UTR   | 0.61 | (0.43; 0.87) | 6.5E-03 |
| cg08444457    | <i>ATF7IP2</i>   | chr16 | Body    | 0.61 | (0.43; 0.87) | 6.5E-03 |
| cg25546888    | <i>PTPRN2</i>    | chr7  | Body    | 0.54 | (0.35; 0.84) | 6.5E-03 |
| cg25744433    | <i>CDH13</i>     | chr16 | Body    | 1.68 | (1.16; 2.44) | 6.6E-03 |
| cg10495402    | <i>CHD6</i>      | chr20 | Body    | 0.59 | (0.4; 0.86)  | 6.6E-03 |
| cg22544571    | <i>SLC16A9</i>   | chr10 | 5'UTR   | 0.55 | (0.36; 0.85) | 6.7E-03 |
| ch.10.736188R | <i>WAC</i>       | chr10 | Body    | 1.66 | (1.15; 2.39) | 6.7E-03 |
| cg06778159    | <i>TNRC18</i>    | chr7  | Body    | 0.61 | (0.43; 0.87) | 6.7E-03 |
| cg10833215    | <i>TAOK3</i>     | chr12 | 5'UTR   | 1.75 | (1.17; 2.64) | 6.7E-03 |
| cg23241628    | <i>RTN4</i>      | chr2  | TSS1500 | 0.58 | (0.39; 0.86) | 6.8E-03 |
| cg10650290    | <i>PTPRN2</i>    | chr7  | Body    | 0.62 | (0.44; 0.88) | 6.9E-03 |
| cg26046877    | <i>PTPRN2</i>    | chr7  | Body    | 0.61 | (0.42; 0.87) | 6.9E-03 |
| cg14823710    | <i>CTDSPL2</i>   | chr15 | 5'UTR   | 0.57 | (0.37; 0.86) | 7.0E-03 |
| cg05579652    | <i>CACNA1C</i>   | chr12 | Body    | 1.6  | (1.14; 2.26) | 7.0E-03 |
| cg14433374    | <i>SCAF8</i>     | chr6  | Body    | 1.95 | (1.2; 3.18)  | 7.1E-03 |
| cg18671729    | <i>DMXL2</i>     | chr15 | Body    | 0.6  | (0.41; 0.87) | 7.2E-03 |
| cg26870074    | <i>ZBTB20</i>    | chr3  | Body    | 0.51 | (0.31; 0.83) | 7.2E-03 |
| cg26870074    | <i>ZBTB20</i>    | chr3  | 5'UTR   | 0.51 | (0.31; 0.83) | 7.2E-03 |
| cg01352634    | <i>FBXO11</i>    | chr2  | TSS1500 | 0.58 | (0.39; 0.86) | 7.2E-03 |
| cg07508787    | <i>TNRC18</i>    | chr7  | Body    | 0.61 | (0.43; 0.88) | 7.3E-03 |
| cg21126680    | <i>TAOK3</i>     | chr12 | Body    | 0.55 | (0.36; 0.85) | 7.3E-03 |
| cg21902949    | <i>CDH13</i>     | chr16 | Body    | 0.56 | (0.37; 0.86) | 7.3E-03 |
| cg14836532    | <i>TNFRSF11A</i> | chr18 | TSS1500 | 0.61 | (0.42; 0.87) | 7.4E-03 |
| cg12713223    | <i>PTPRN2</i>    | chr7  | Body    | 1.71 | (1.15; 2.53) | 7.5E-03 |
| cg05587239    | <i>CUX2</i>      | chr12 | Body    | 1.61 | (1.13; 2.28) | 7.6E-03 |
| cg04933208    | <i>PTPRU</i>     | chr1  | Body    | 0.61 | (0.42; 0.88) | 7.8E-03 |
| cg22091297    | <i>TNFRSF19</i>  | chr13 | 5'UTR   | 1.67 | (1.14; 2.43) | 7.8E-03 |
| cg22091297    | <i>TNFRSF19</i>  | chr13 | TSS200  | 1.67 | (1.14; 2.43) | 7.8E-03 |
| cg01093285    | <i>PTPRN2</i>    | chr7  | Body    | 1.57 | (1.13; 2.19) | 7.9E-03 |
| cg18665569    | <i>MBD5</i>      | chr2  | 5'UTR   | 0.59 | (0.4; 0.87)  | 8.0E-03 |
| cg06149863    | <i>DMXL2</i>     | chr15 | TSS1500 | 0.27 | (0.1; 0.71)  | 8.2E-03 |
| cg02872418    | <i>PTPRN2</i>    | chr7  | Body    | 1.62 | (1.13; 2.32) | 8.3E-03 |
| cg05723953    | <i>HMGB4</i>     | chr1  | 5'UTR   | 0.65 | (0.47; 0.89) | 8.3E-03 |



|            |                  |       |         |      |              |         |
|------------|------------------|-------|---------|------|--------------|---------|
| cg05723953 | <i>HMGB4</i>     | chr1  | TSS1500 | 0.65 | (0.47; 0.89) | 8.3E-03 |
| cg05723953 | <i>CSMD2</i>     | chr1  | Body    | 0.65 | (0.47; 0.89) | 8.3E-03 |
| cg10288307 | <i>PTPRN2</i>    | chr7  | Body    | 0.58 | (0.39; 0.87) | 8.3E-03 |
| cg05847519 | <i>CDH13</i>     | chr16 | 3'UTR   | 1.75 | (1.15; 2.65) | 8.3E-03 |
| cg02100997 | <i>PTPRU</i>     | chr1  | Body    | 0.54 | (0.35; 0.86) | 8.4E-03 |
| cg15536575 | <i>FBXO38</i>    | chr5  | TSS200  | 0.58 | (0.38; 0.87) | 8.4E-03 |
| cg14952224 | <i>TNFRSF11B</i> | chr8  | TSS200  | 0.57 | (0.38; 0.87) | 8.5E-03 |
| cg24202131 | <i>BRUNOL4</i>   | chr18 | Body    | 1.65 | (1.14; 2.39) | 8.5E-03 |
| cg07989917 | <i>RECQL5</i>    | chr17 | Body    | 1.76 | (1.15; 2.68) | 8.6E-03 |
| cg06316818 | <i>CPEB1</i>     | chr15 | Body    | 0.59 | (0.4; 0.88)  | 8.7E-03 |
| cg06316818 | <i>CPEB1</i>     | chr15 | 5'UTR   | 0.59 | (0.4; 0.88)  | 8.7E-03 |
| cg26934214 | <i>PTPRN2</i>    | chr7  | Body    | 0.67 | (0.49; 0.9)  | 8.9E-03 |
| cg20637014 | <i>PTPRN2</i>    | chr7  | Body    | 1.73 | (1.15; 2.61) | 9.1E-03 |
| cg14476013 | <i>AKAP3</i>     | chr12 | 5'UTR   | 1.56 | (1.12; 2.19) | 9.2E-03 |
| cg14476013 | <i>NDUFA9</i>    | chr12 | TSS1500 | 1.56 | (1.12; 2.19) | 9.2E-03 |
| cg20760085 | <i>BARX2</i>     | chr11 | Body    | 0.57 | (0.37; 0.87) | 9.3E-03 |
| cg11318232 | <i>CSMD2</i>     | chr1  | TSS1500 | 0.62 | (0.43; 0.89) | 9.3E-03 |
| cg11318232 | <i>CSMD2</i>     | chr1  | TSS200  | 0.62 | (0.43; 0.89) | 9.3E-03 |
| cg02394998 | <i>PTPRN2</i>    | chr7  | Body    | 0.65 | (0.47; 0.9)  | 9.3E-03 |
| cg23489038 | <i>CUX2</i>      | chr12 | Body    | 0.44 | (0.24; 0.82) | 9.5E-03 |
| cg14012538 | <i>PTPRN2</i>    | chr7  | Body    | 0.64 | (0.46; 0.9)  | 9.6E-03 |
| cg16513467 | <i>WAC</i>       | chr10 | Body    | 0.6  | (0.41; 0.88) | 9.8E-03 |
| cg16513467 | <i>WAC</i>       | chr10 | 1stExon | 0.6  | (0.41; 0.88) | 9.8E-03 |
| cg16513467 | <i>WAC</i>       | chr10 | 5'UTR   | 0.6  | (0.41; 0.88) | 9.8E-03 |
| cg17904797 | <i>CSMD2</i>     | chr1  | Body    | 1.73 | (1.14; 2.61) | 9.8E-03 |
| cg24829323 | <i>UBE2E2</i>    | chr3  | TSS1500 | 0.66 | (0.48; 0.9)  | 9.9E-03 |
| cg18134437 | <i>PTPRN2</i>    | chr7  | Body    | 1.63 | (1.12; 2.38) | 1.0E-02 |
| cg21798574 | <i>CHD6</i>      | chr20 | Body    | 0.47 | (0.27; 0.84) | 1.0E-02 |
| cg10778298 | <i>PEX14</i>     | chr1  | Body    | 1.54 | (1.11; 2.15) | 1.0E-02 |
| cg06767389 | <i>PTPRN2</i>    | chr7  | Body    | 0.54 | (0.34; 0.87) | 1.0E-02 |
| cg00765518 | <i>CCDC80</i>    | chr3  | Body    | 1.54 | (1.11; 2.14) | 1.1E-02 |
| cg08753951 | <i>RTN4R</i>     | chr22 | Body    | 1.72 | (1.13; 2.6)  | 1.1E-02 |
| cg02899718 | <i>DACH1</i>     | chr13 | TSS200  | 0.64 | (0.46; 0.9)  | 1.1E-02 |
| cg09270225 | <i>CSMD2</i>     | chr1  | TSS1500 | 0.64 | (0.45; 0.9)  | 1.1E-02 |
| cg15063355 | <i>CHFR</i>      | chr12 | TSS1500 | 0.68 | (0.51; 0.92) | 1.1E-02 |
| cg23298862 | <i>PTPRN2</i>    | chr7  | Body    | 0.65 | (0.47; 0.91) | 1.1E-02 |
| cg23874606 | <i>PTPRS</i>     | chr19 | Body    | 1.67 | (1.12; 2.48) | 1.1E-02 |
| cg26025358 | <i>ATP8A1</i>    | chr4  | Body    | 0.53 | (0.33; 0.87) | 1.1E-02 |
| cg04431143 | <i>CTDSPL</i>    | chr3  | Body    | 0.53 | (0.32; 0.86) | 1.1E-02 |
| cg09914263 | <i>TENM2</i>     | chr5  | Body    | 0.62 | (0.43; 0.9)  | 1.1E-02 |
| cg26912640 | <i>RAP1B</i>     | chr12 | 5'UTR   | 1.64 | (1.12; 2.39) | 1.1E-02 |
| cg06223313 | <i>CTNND2</i>    | chr5  | Body    | 0.63 | (0.44; 0.9)  | 1.1E-02 |
| cg06223313 | <i>CTNND2</i>    | chr5  | 5'UTR   | 0.63 | (0.44; 0.9)  | 1.1E-02 |
| cg07157902 | <i>TNRC6A</i>    | chr16 | Body    | 1.62 | (1.11; 2.34) | 1.1E-02 |
| cg12267407 | <i>CEP350</i>    | chr1  | 5'UTR   | 0.64 | (0.45; 0.9)  | 1.1E-02 |
| cg19956836 | <i>RTN4RL2</i>   | chr11 | Body    | 2.28 | (1.2; 4.31)  | 1.1E-02 |
| cg20096382 | <i>CUX2</i>      | chr12 | Body    | 1.59 | (1.11; 2.27) | 1.2E-02 |
| cg20515302 | <i>MEIS2</i>     | chr15 | 5'UTR   | 1.66 | (1.12; 2.47) | 1.2E-02 |
| cg20515302 | <i>MEIS2</i>     | chr15 | 1stExon | 1.66 | (1.12; 2.47) | 1.2E-02 |
| cg20515302 | <i>MEIS2</i>     | chr15 | Body    | 1.66 | (1.12; 2.47) | 1.2E-02 |
| cg20515302 | <i>MEIS2</i>     | chr15 | TSS1500 | 1.66 | (1.12; 2.47) | 1.2E-02 |
| cg09029192 | <i>TNRC6C</i>    | chr17 | 5'UTR   | 1.96 | (1.16; 3.33) | 1.2E-02 |
| cg12559179 | <i>PTPRS</i>     | chr19 | 5'UTR   | 0.68 | (0.5; 0.92)  | 1.2E-02 |
| cg13333383 | <i>CDH13</i>     | chr16 | Body    | 1.54 | (1.1; 2.17)  | 1.2E-02 |
| cg02577881 | <i>FBXO34</i>    | chr14 | 5'UTR   | 0.59 | (0.39; 0.89) | 1.2E-02 |
| cg03685124 | <i>SGIP1</i>     | chr1  | TSS200  | 0.65 | (0.46; 0.91) | 1.2E-02 |
| cg03685124 | <i>SGIP1</i>     | chr1  | TSS1500 | 0.65 | (0.46; 0.91) | 1.2E-02 |
| cg18088578 | <i>PTPRU</i>     | chr1  | ExonBnd | 2.03 | (1.17; 3.52) | 1.2E-02 |
| cg18088578 | <i>PTPRU</i>     | chr1  | Body    | 2.03 | (1.17; 3.52) | 1.2E-02 |
| cg27003456 | <i>CTDSPL</i>    | chr3  | Body    | 1.57 | (1.1; 2.23)  | 1.2E-02 |
| cg03391854 | <i>PTPRN2</i>    | chr7  | Body    | 0.63 | (0.44; 0.9)  | 1.2E-02 |



|            |                  |       |         |      |              |         |
|------------|------------------|-------|---------|------|--------------|---------|
| cg23384615 | <i>PTPRN2</i>    | chr7  | Body    | 1.56 | (1.1; 2.21)  | 1.2E-02 |
| cg10331038 | <i>TNR</i>       | chr1  | 5'UTR   | 0.62 | (0.42; 0.9)  | 1.3E-02 |
| cg05971061 | <i>SGIP1</i>     | chr1  | TSS1500 | 0.6  | (0.4; 0.9)   | 1.3E-02 |
| cg14178173 | <i>PTPRN2</i>    | chr7  | Body    | 0.67 | (0.49; 0.92) | 1.3E-02 |
| cg16435591 | <i>AKAP13</i>    | chr15 | Body    | 0.61 | (0.41; 0.9)  | 1.3E-02 |
| cg16435591 | <i>AKAP13</i>    | chr15 | ExonBnd | 0.61 | (0.41; 0.9)  | 1.3E-02 |
| cg27604944 | <i>DACH1</i>     | chr13 | 1stExon | 0.57 | (0.37; 0.89) | 1.3E-02 |
| cg01454124 | <i>TENM2</i>     | chr5  | Body    | 0.68 | (0.51; 0.92) | 1.3E-02 |
| cg13300744 | <i>CUX2</i>      | chr12 | Body    | 1.68 | (1.12; 2.53) | 1.3E-02 |
| cg00585187 | <i>CTDSPL</i>    | chr3  | Body    | 1.56 | (1.1; 2.22)  | 1.3E-02 |
| cg08113851 | <i>PTPRN2</i>    | chr7  | Body    | 0.66 | (0.47; 0.91) | 1.3E-02 |
| cg17852290 | <i>CDH13</i>     | chr16 | Body    | 1.84 | (1.14; 2.99) | 1.3E-02 |
| cg16381315 | <i>ZBTB20</i>    | chr3  | Body    | 0.64 | (0.45; 0.91) | 1.3E-02 |
| cg16381315 | <i>ZBTB20</i>    | chr3  | 5'UTR   | 0.64 | (0.45; 0.91) | 1.3E-02 |
| cg16232236 | <i>CPEB1</i>     | chr15 | Body    | 0.62 | (0.43; 0.91) | 1.3E-02 |
| cg20114394 | <i>FSTL1</i>     | chr3  | TSS1500 | 1.73 | (1.12; 2.66) | 1.3E-02 |
| cg08698795 | <i>CCDC80</i>    | chr3  | Body    | 1.59 | (1.1; 2.3)   | 1.3E-02 |
| cg21839449 | <i>PTPRN2</i>    | chr7  | Body    | 1.53 | (1.09; 2.15) | 1.3E-02 |
| cg13093457 | <i>CDH13</i>     | chr16 | Body    | 1.64 | (1.11; 2.43) | 1.3E-02 |
| cg04139300 | <i>CHD6</i>      | chr20 | 5'UTR   | 1.64 | (1.11; 2.42) | 1.3E-02 |
| cg04139300 | <i>CHD6</i>      | chr20 | 1stExon | 1.64 | (1.11; 2.42) | 1.3E-02 |
| cg18136028 | <i>TNRC18</i>    | chr7  | Body    | 1.76 | (1.12; 2.75) | 1.4E-02 |
| cg06684201 | <i>PTPRN2</i>    | chr7  | Body    | 1.5  | (1.09; 2.06) | 1.4E-02 |
| cg05166022 | <i>CACNA1C</i>   | chr12 | 3'UTR   | 1.76 | (1.12; 2.76) | 1.4E-02 |
| cg15622556 | <i>TNFRSF1B</i>  | chr1  | Body    | 1.6  | (1.1; 2.33)  | 1.4E-02 |
| cg19708702 | <i>SUGCT</i>     | chr7  | Body    | 0.56 | (0.36; 0.89) | 1.4E-02 |
| cg13965321 | <i>FBXO38</i>    | chr5  | 5'UTR   | 1.47 | (1.08; 2)    | 1.4E-02 |
| cg00404049 | <i>SRSF10</i>    | chr1  | Body    | 0.61 | (0.41; 0.9)  | 1.4E-02 |
| cg09702799 | <i>MTCL1</i>     | chr18 | Body    | 0.58 | (0.38; 0.9)  | 1.4E-02 |
| cg07747177 | <i>DCUN1D4</i>   | chr4  | TSS1500 | 1.52 | (1.09; 2.13) | 1.4E-02 |
| cg17050526 | <i>TENM2</i>     | chr5  | Body    | 0.61 | (0.41; 0.91) | 1.4E-02 |
| cg26242726 | <i>TNFRSF11A</i> | chr18 | Body    | 1.93 | (1.14; 3.27) | 1.4E-02 |
| cg02839565 | <i>CACNA1C</i>   | chr12 | Body    | 1.52 | (1.09; 2.11) | 1.4E-02 |
| cg03173748 | <i>CDH13</i>     | chr16 | Body    | 1.56 | (1.09; 2.22) | 1.4E-02 |
| cg27100547 | <i>CREBBP</i>    | chr16 | Body    | 1.54 | (1.09; 2.18) | 1.4E-02 |
| cg04448648 | <i>RECQL5</i>    | chr17 | Body    | 1.68 | (1.11; 2.53) | 1.4E-02 |
| cg12027899 | <i>ZFP91</i>     | chr11 | 3'UTR   | 1.65 | (1.1; 2.48)  | 1.5E-02 |
| cg25215360 | <i>PEX14</i>     | chr1  | Body    | 1.55 | (1.09; 2.2)  | 1.5E-02 |
| cg18828966 | <i>AKAP13</i>    | chr15 | Body    | 1.56 | (1.09; 2.23) | 1.5E-02 |
| cg02160692 | <i>FBXO11</i>    | chr2  | 5'UTR   | 0.67 | (0.48; 0.93) | 1.5E-02 |
| cg09023979 | <i>EIF2S1</i>    | chr14 | TSS1500 | 1.63 | (1.1; 2.41)  | 1.5E-02 |
| cg23218943 | <i>FBXO36</i>    | chr2  | TSS1500 | 0.6  | (0.39; 0.91) | 1.5E-02 |
| cg17203820 | <i>SUGCT</i>     | chr7  | Body    | 1.54 | (1.08; 2.18) | 1.6E-02 |
| cg21432513 | <i>CHFR</i>      | chr12 | Body    | 0.67 | (0.49; 0.93) | 1.6E-02 |
| cg20663709 | <i>COL1A2</i>    | chr7  | Body    | 0.61 | (0.41; 0.91) | 1.6E-02 |
| cg04083208 | <i>PTPRN2</i>    | chr7  | Body    | 1.6  | (1.09; 2.34) | 1.6E-02 |
| cg27431037 | <i>CACNA1C</i>   | chr12 | Body    | 0.65 | (0.46; 0.92) | 1.6E-02 |
| cg06263372 | <i>BRUNOL4</i>   | chr18 | Body    | 0.68 | (0.49; 0.93) | 1.6E-02 |
| cg11830694 | <i>CACNA1C</i>   | chr12 | Body    | 0.65 | (0.46; 0.92) | 1.6E-02 |
| cg01571169 | <i>FBXO31</i>    | chr16 | Body    | 1.66 | (1.1; 2.5)   | 1.6E-02 |
| cg12001456 | <i>PTPRN2</i>    | chr7  | Body    | 1.51 | (1.08; 2.11) | 1.6E-02 |
| cg15465343 | <i>PEX14</i>     | chr1  | Body    | 1.68 | (1.1; 2.58)  | 1.6E-02 |
| cg09214447 | <i>ARID1A</i>    | chr1  | Body    | 0.62 | (0.42; 0.92) | 1.6E-02 |
| cg20899329 | <i>PTPRN2</i>    | chr7  | Body    | 0.64 | (0.45; 0.92) | 1.6E-02 |
| cg13085404 | <i>BARX2</i>     | chr11 | Body    | 0.65 | (0.46; 0.92) | 1.7E-02 |
| cg09335647 | <i>CNTNAP2</i>   | chr7  | Body    | 0.62 | (0.42; 0.92) | 1.7E-02 |
| cg26407924 | <i>CTNND2</i>    | chr5  | TSS1500 | 1.52 | (1.08; 2.15) | 1.7E-02 |
| cg25598678 | <i>PTPRS</i>     | chr19 | Body    | 1.65 | (1.09; 2.49) | 1.7E-02 |
| cg20338628 | <i>DDHD2</i>     | chr8  | 5'UTR   | 0.67 | (0.49; 0.93) | 1.7E-02 |
| cg20338628 | <i>DDHD2</i>     | chr8  | 1stExon | 0.67 | (0.49; 0.93) | 1.7E-02 |
| cg20338628 | <i>DDHD2</i>     | chr8  | TSS1500 | 0.67 | (0.49; 0.93) | 1.7E-02 |



|            |          |       |         |      |              |         |
|------------|----------|-------|---------|------|--------------|---------|
| cg05040815 | SLC16A9  | chr10 | Body    | 0.57 | (0.35; 0.9)  | 1.7E-02 |
| cg18216587 | CNTNAP2  | chr7  | Body    | 0.58 | (0.37; 0.91) | 1.7E-02 |
| cg15685922 | MEX3A    | chr1  | 3'UTR   | 1.5  | (1.07; 2.08) | 1.7E-02 |
| cg17958768 | CTDSPL2  | chr15 | Body    | 0.58 | (0.38; 0.91) | 1.7E-02 |
| cg07264461 | AKAP13   | chr15 | 5'UTR   | 0.55 | (0.33; 0.9)  | 1.7E-02 |
| cg04193909 | TNRC18   | chr7  | Body    | 0.66 | (0.47; 0.93) | 1.7E-02 |
| cg16468350 | TNRC6B   | chr22 | Body    | 2.02 | (1.13; 3.59) | 1.7E-02 |
| cg06648780 | ALCAM    | chr3  | Body    | 0.67 | (0.48; 0.93) | 1.7E-02 |
| cg26167736 | ATP6V0C  | chr16 | Body    | 1.75 | (1.1; 2.77)  | 1.7E-02 |
| cg00089915 | SGIP1    | chr1  | TSS200  | 1.59 | (1.08; 2.34) | 1.8E-02 |
| cg02860108 | PTPRN2   | chr7  | Body    | 1.52 | (1.08; 2.15) | 1.8E-02 |
| cg05341539 | AKAP13   | chr15 | Body    | 1.48 | (1.07; 2.03) | 1.8E-02 |
| cg10618874 | CHD6     | chr20 | 5'UTR   | 1.56 | (1.08; 2.26) | 1.8E-02 |
| cg00496170 | EIF2S1   | chr14 | TSS200  | 0.64 | (0.45; 0.93) | 1.8E-02 |
| cg19360425 | PTPRS    | chr19 | Body    | 2.01 | (1.13; 3.58) | 1.8E-02 |
| cg24688143 | PTPRN2   | chr7  | Body    | 1.61 | (1.09; 2.4)  | 1.8E-02 |
| cg04076461 | DCUN1D4  | chr4  | Body    | 0.66 | (0.47; 0.93) | 1.8E-02 |
| cg22125926 | TNFRSF19 | chr13 | TSS200  | 0.66 | (0.47; 0.93) | 1.8E-02 |
| cg20749591 | SUGCT    | chr7  | Body    | 0.56 | (0.35; 0.91) | 1.8E-02 |
| cg26896818 | PDE8A    | chr15 | Body    | 0.32 | (0.13; 0.83) | 1.8E-02 |
| cg25656514 | WAC      | chr10 | Body    | 0.65 | (0.46; 0.93) | 1.8E-02 |
| cg01125058 | ZNF704   | chr8  | Body    | 1.55 | (1.08; 2.23) | 1.8E-02 |
| cg19192649 | TXNDC9   | chr2  | TSS200  | 1.51 | (1.07; 2.12) | 1.9E-02 |
| cg24443768 | RTN4     | chr2  | Body    | 0.53 | (0.31; 0.9)  | 1.9E-02 |
| cg08975641 | COL5A2   | chr2  | Body    | 0.64 | (0.44; 0.93) | 1.9E-02 |
| cg17116969 | ZNF704   | chr8  | Body    | 1.61 | (1.08; 2.41) | 1.9E-02 |
| cg23030397 | CHFR     | chr12 | 3'UTR   | 0.64 | (0.45; 0.93) | 1.9E-02 |
| cg08098392 | CACNA1C  | chr12 | Body    | 1.45 | (1.06; 1.99) | 1.9E-02 |
| cg12348202 | PTPRN2   | chr7  | TSS1500 | 0.55 | (0.34; 0.91) | 1.9E-02 |
| cg14610403 | SGIP1    | chr1  | TSS1500 | 0.63 | (0.42; 0.93) | 1.9E-02 |
| cg08930672 | PTPRN2   | chr7  | Body    | 0.67 | (0.47; 0.94) | 1.9E-02 |
| cg01067813 | CNTNAP2  | chr7  | Body    | 0.58 | (0.37; 0.92) | 1.9E-02 |
| cg09313299 | TAOK3    | chr12 | 5'UTR   | 1.55 | (1.07; 2.23) | 1.9E-02 |
| cg01528768 | RTN4RL1  | chr17 | Body    | 0.54 | (0.32; 0.9)  | 1.9E-02 |
| cg09828503 | TNRC18   | chr7  | Body    | 0.64 | (0.44; 0.93) | 2.0E-02 |
| cg21459816 | PTPRN2   | chr7  | Body    | 0.66 | (0.47; 0.94) | 2.0E-02 |
| cg26152597 | ZBTB20   | chr3  | 5'UTR   | 0.72 | (0.54; 0.95) | 2.0E-02 |
| cg04555113 | CTNND2   | chr5  | Body    | 0.67 | (0.48; 0.94) | 2.0E-02 |
| cg04555113 | CTNND2   | chr5  | 5'UTR   | 0.67 | (0.48; 0.94) | 2.0E-02 |
| cg12834378 | PTPRN2   | chr7  | Body    | 1.46 | (1.06; 2)    | 2.0E-02 |
| cg00312762 | CSMD2    | chr1  | Body    | 1.71 | (1.09; 2.68) | 2.0E-02 |
| cg12138780 | PTPRN2   | chr7  | Body    | 0.67 | (0.47; 0.94) | 2.0E-02 |
| cg07315426 | PTPRN2   | chr7  | Body    | 0.65 | (0.45; 0.94) | 2.1E-02 |
| cg21575121 | CHD6     | chr20 | Body    | 1.47 | (1.06; 2.04) | 2.1E-02 |
| cg04774496 | CHFR     | chr12 | TSS1500 | 1.55 | (1.07; 2.24) | 2.1E-02 |
| cg08722541 | CACNA1C  | chr12 | Body    | 1.72 | (1.09; 2.72) | 2.1E-02 |
| cg05983814 | DNAI2    | chr17 | 5'UTR   | 3.18 | (1.19; 8.5)  | 2.1E-02 |
| cg12520664 | CDH13    | chr16 | Body    | 1.69 | (1.08; 2.63) | 2.1E-02 |
| cg20035319 | TNRC6C   | chr17 | 3'UTR   | 1.69 | (1.08; 2.65) | 2.1E-02 |
| cg21508011 | TENM2    | chr5  | Body    | 0.52 | (0.29; 0.91) | 2.1E-02 |
| cg08401938 | PTPRN2   | chr7  | Body    | 1.54 | (1.07; 2.22) | 2.1E-02 |
| cg01312486 | ELAVL4   | chr1  | Body    | 0.58 | (0.36; 0.92) | 2.1E-02 |
| cg10203440 | CREBBP   | chr16 | 3'UTR   | 1.56 | (1.07; 2.29) | 2.2E-02 |
| cg06208270 | MEX3A    | chr1  | 3'UTR   | 1.54 | (1.07; 2.21) | 2.2E-02 |
| cg18725076 | CTNND2   | chr5  | TSS1500 | 0.63 | (0.43; 0.93) | 2.2E-02 |
| cg17174566 | ACVR2A   | chr2  | Body    | 1.59 | (1.07; 2.36) | 2.2E-02 |
| cg20149255 | CEP350   | chr1  | 5'UTR   | 0.62 | (0.41; 0.93) | 2.2E-02 |
| cg00545804 | TSHZ3    | chr19 | TSS1500 | 0.64 | (0.43; 0.94) | 2.2E-02 |
| cg14689490 | PTPRN2   | chr7  | Body    | 1.53 | (1.06; 2.21) | 2.2E-02 |
| cg22188450 | ELAVL4   | chr1  | TSS1500 | 0.57 | (0.35; 0.92) | 2.2E-02 |
| cg22188450 | ELAVL4   | chr1  | Body    | 0.57 | (0.35; 0.92) | 2.2E-02 |



|            |          |       |         |      |              |         |
|------------|----------|-------|---------|------|--------------|---------|
| cg12968518 | ACVR2A   | chr2  | TSS200  | 0.58 | (0.36; 0.93) | 2.2E-02 |
| cg02896073 | NOL4     | chr18 | Body    | 1.49 | (1.06; 2.1)  | 2.3E-02 |
| cg04495299 | TNRC18   | chr7  | Body    | 0.67 | (0.48; 0.95) | 2.3E-02 |
| cg23066936 | CHCHD6   | chr3  | Body    | 0.65 | (0.45; 0.94) | 2.3E-02 |
| cg00624878 | CREBBP   | chr16 | Body    | 0.69 | (0.5; 0.95)  | 2.3E-02 |
| cg19738802 | PTPRN2   | chr7  | Body    | 1.52 | (1.06; 2.19) | 2.3E-02 |
| cg11757808 | CTNND2   | chr5  | Body    | 1.47 | (1.06; 2.05) | 2.3E-02 |
| cg23758354 | PTPRN2   | chr7  | Body    | 1.59 | (1.07; 2.37) | 2.3E-02 |
| cg05209192 | PTPRN2   | chr7  | Body    | 0.62 | (0.41; 0.94) | 2.3E-02 |
| cg08861449 | CSMD2    | chr1  | 3'UTR   | 1.71 | (1.08; 2.73) | 2.3E-02 |
| cg10502354 | PTPRN2   | chr7  | Body    | 0.6  | (0.39; 0.93) | 2.3E-02 |
| cg07736327 | DCUN1D4  | chr4  | Body    | 0.69 | (0.5; 0.95)  | 2.3E-02 |
| cg09533758 | SUSD4    | chr1  | Body    | 1.54 | (1.06; 2.25) | 2.4E-02 |
| cg14310768 | FBXO11   | chr2  | TSS1500 | 0.69 | (0.5; 0.95)  | 2.4E-02 |
| cg18742528 | PHACTR1  | chr6  | Body    | 0.58 | (0.36; 0.93) | 2.4E-02 |
| cg02350295 | CREBBP   | chr16 | Body    | 1.46 | (1.05; 2.03) | 2.4E-02 |
| cg17561365 | PTPRN2   | chr7  | Body    | 0.64 | (0.43; 0.94) | 2.4E-02 |
| cg26138500 | PTPRN2   | chr7  | Body    | 0.63 | (0.42; 0.94) | 2.4E-02 |
| cg05370334 | WWOX     | chr16 | Body    | 0.69 | (0.5; 0.95)  | 2.4E-02 |
| cg05529091 | CUX2     | chr12 | Body    | 0.71 | (0.53; 0.96) | 2.4E-02 |
| cg14357226 | FBXO33   | chr14 | TSS1500 | 0.68 | (0.48; 0.95) | 2.5E-02 |
| cg10055059 | NOL4     | chr18 | Body    | 0.68 | (0.49; 0.95) | 2.5E-02 |
| cg24002522 | ALCAM    | chr3  | Body    | 1.58 | (1.06; 2.35) | 2.5E-02 |
| cg05024901 | AKAP13   | chr15 | 5'UTR   | 1.51 | (1.05; 2.16) | 2.5E-02 |
| cg04545942 | DACH1    | chr13 | Body    | 1.56 | (1.06; 2.29) | 2.5E-02 |
| cg16609021 | PTPRN2   | chr7  | Body    | 1.45 | (1.05; 2)    | 2.5E-02 |
| cg04040672 | CDH13    | chr16 | 5'UTR   | 0.63 | (0.42; 0.94) | 2.5E-02 |
| cg04040672 | CDH13    | chr16 | Body    | 0.63 | (0.42; 0.94) | 2.5E-02 |
| cg18889973 | PTPRN2   | chr7  | Body    | 0.7  | (0.51; 0.96) | 2.5E-02 |
| cg17218498 | TDRP     | chr8  | 5'UTR   | 1.52 | (1.05; 2.19) | 2.5E-02 |
| cg17218498 | TDRP     | chr8  | TSS200  | 1.52 | (1.05; 2.19) | 2.5E-02 |
| cg16387516 | CDH13    | chr16 | Body    | 0.67 | (0.47; 0.95) | 2.5E-02 |
| cg13561598 | PTPRN2   | chr7  | Body    | 0.67 | (0.47; 0.95) | 2.5E-02 |
| cg06041067 | PTPRN2   | chr7  | Body    | 1.46 | (1.05; 2.04) | 2.6E-02 |
| cg19689370 | MEIS2    | chr15 | Body    | 0.69 | (0.5; 0.96)  | 2.6E-02 |
| cg12312863 | ATP6V0C  | chr16 | 3'UTR   | 0.65 | (0.45; 0.95) | 2.6E-02 |
| cg09395552 | CHD6     | chr20 | Body    | 0.59 | (0.37; 0.94) | 2.6E-02 |
| cg06176929 | PTPRN2   | chr7  | Body    | 0.65 | (0.45; 0.95) | 2.6E-02 |
| cg19798199 | DDHD2    | chr8  | 5'UTR   | 0.67 | (0.47; 0.95) | 2.6E-02 |
| cg19798199 | DDHD2    | chr8  | ExonBnd | 0.67 | (0.47; 0.95) | 2.6E-02 |
| cg05522408 | ZBTB20   | chr3  | Body    | 0.66 | (0.46; 0.95) | 2.6E-02 |
| cg05522408 | ZBTB20   | chr3  | 5'UTR   | 0.66 | (0.46; 0.95) | 2.6E-02 |
| cg20136855 | TNFRSF1B | chr1  | Body    | 1.89 | (1.08; 3.32) | 2.6E-02 |
| cg01480833 | ZBTB20   | chr3  | Body    | 0.49 | (0.26; 0.92) | 2.6E-02 |
| cg01480833 | ZBTB20   | chr3  | 5'UTR   | 0.49 | (0.26; 0.92) | 2.6E-02 |
| cg21725496 | TNRC18   | chr7  | Body    | 1.51 | (1.05; 2.17) | 2.6E-02 |
| cg13464117 | PTPRN2   | chr7  | Body    | 0.65 | (0.44; 0.95) | 2.6E-02 |
| cg01689048 | FBXO31   | chr16 | Body    | 1.52 | (1.05; 2.19) | 2.6E-02 |
| cg01689048 | FBXO31   | chr16 | 5'UTR   | 1.52 | (1.05; 2.19) | 2.6E-02 |
| cg00006600 | AKAP13   | chr15 | 5'UTR   | 0.71 | (0.52; 0.96) | 2.6E-02 |
| cg15267623 | NOL4L    | chr20 | Body    | 0.6  | (0.39; 0.94) | 2.7E-02 |
| cg11173773 | TXNDC9   | chr2  | 1stExon | 0.67 | (0.47; 0.95) | 2.7E-02 |
| cg11173773 | TXNDC9   | chr2  | 5'UTR   | 0.67 | (0.47; 0.95) | 2.7E-02 |
| cg05645404 | ALCAM    | chr3  | Body    | 0.68 | (0.48; 0.96) | 2.7E-02 |
| cg06614534 | CREBBP   | chr16 | Body    | 1.5  | (1.05; 2.15) | 2.7E-02 |
| cg10010183 | PTPRU    | chr1  | Body    | 0.65 | (0.44; 0.95) | 2.7E-02 |
| cg09473826 | TNR      | chr1  | 5'UTR   | 0.68 | (0.48; 0.96) | 2.7E-02 |
| cg04110886 | PEX14    | chr1  | Body    | 1.74 | (1.06; 2.83) | 2.7E-02 |
| cg19939572 | ATF7IP   | chr12 | 5'UTR   | 0.68 | (0.48; 0.96) | 2.7E-02 |
| cg19939572 | ATF7IP   | chr12 | Body    | 0.68 | (0.48; 0.96) | 2.7E-02 |
| cg08615694 | PTPRN2   | chr7  | Body    | 1.48 | (1.04; 2.09) | 2.7E-02 |



|            |                 |       |         |      |              |         |
|------------|-----------------|-------|---------|------|--------------|---------|
| cg24350296 | <i>TNFRSF19</i> | chr13 | TSS1500 | 0.69 | (0.5; 0.96)  | 2.8E-02 |
| cg05818685 | <i>CTNND2</i>   | chr5  | Body    | 1.66 | (1.06; 2.59) | 2.8E-02 |
| cg08883197 | <i>TNFRSF19</i> | chr13 | Body    | 1.5  | (1.05; 2.14) | 2.8E-02 |
| cg25329538 | <i>ZBTB20</i>   | chr3  | Body    | 0.61 | (0.39; 0.95) | 2.8E-02 |
| cg25329538 | <i>ZBTB20</i>   | chr3  | 5'UTR   | 0.61 | (0.39; 0.95) | 2.8E-02 |
| cg17186086 | <i>TAOK3</i>    | chr12 | TSS200  | 0.69 | (0.5; 0.96)  | 2.8E-02 |
| cg16640553 | <i>FBXO31</i>   | chr16 | Body    | 0.65 | (0.44; 0.95) | 2.8E-02 |
| cg15204882 | <i>NOL4L</i>    | chr20 | Body    | 0.66 | (0.46; 0.96) | 2.8E-02 |
| cg02637432 | <i>BARX2</i>    | chr11 | Body    | 0.68 | (0.49; 0.96) | 2.8E-02 |
| cg03375339 | <i>FBXO36</i>   | chr2  | Body    | 0.67 | (0.46; 0.96) | 2.8E-02 |
| cg13569053 | <i>PTPRU</i>    | chr1  | Body    | 0.62 | (0.4; 0.95)  | 2.9E-02 |
| cg25363807 | <i>ERI3</i>     | chr1  | Body    | 1.8  | (1.06; 3.04) | 2.9E-02 |
| cg27581190 | <i>PTPRN2</i>   | chr7  | Body    | 1.44 | (1.04; 2)    | 2.9E-02 |
| cg04853218 | <i>FBXO34</i>   | chr14 | 5'UTR   | 1.95 | (1.07; 3.54) | 2.9E-02 |
| cg04159098 | <i>CSMD2</i>    | chr1  | 3'UTR   | 0.66 | (0.45; 0.96) | 2.9E-02 |
| cg13564859 | <i>DCUN1D4</i>  | chr4  | Body    | 0.64 | (0.43; 0.96) | 2.9E-02 |
| cg13564859 | <i>DCUN1D4</i>  | chr4  | 1stExon | 0.64 | (0.43; 0.96) | 2.9E-02 |
| cg13564859 | <i>DCUN1D4</i>  | chr4  | 5'UTR   | 0.64 | (0.43; 0.96) | 2.9E-02 |
| cg12222588 | <i>BRUNOL4</i>  | chr18 | 3'UTR   | 1.64 | (1.05; 2.55) | 2.9E-02 |
| cg23752651 | <i>TNFRSF1A</i> | chr12 | Body    | 0.6  | (0.38; 0.95) | 2.9E-02 |
| cg25513853 | <i>DNAI2</i>    | chr17 | 5'UTR   | 0.66 | (0.46; 0.96) | 2.9E-02 |
| cg24029819 | <i>PTPRN2</i>   | chr7  | Body    | 1.5  | (1.04; 2.17) | 2.9E-02 |
| cg18460884 | <i>CSMD2</i>    | chr1  | Body    | 0.64 | (0.42; 0.96) | 3.0E-02 |
| cg15044674 | <i>TNRC18</i>   | chr7  | Body    | 1.43 | (1.04; 1.98) | 3.0E-02 |
| cg03966010 | <i>PTPRN2</i>   | chr7  | Body    | 0.64 | (0.42; 0.96) | 3.0E-02 |
| cg22337605 | <i>TNFRSF1B</i> | chr1  | Body    | 0.7  | (0.51; 0.97) | 3.0E-02 |
| cg03071124 | <i>PTPRN2</i>   | chr7  | Body    | 0.68 | (0.48; 0.96) | 3.0E-02 |
| cg06059332 | <i>CNTNAP2</i>  | chr7  | Body    | 1.51 | (1.04; 2.2)  | 3.0E-02 |
| cg25216403 | <i>BRUNOL4</i>  | chr18 | TSS1500 | 0.7  | (0.5; 0.97)  | 3.0E-02 |
| cg08201986 | <i>PTPRN2</i>   | chr7  | Body    | 1.55 | (1.04; 2.3)  | 3.0E-02 |
| cg16992960 | <i>PTPRN2</i>   | chr7  | Body    | 0.69 | (0.49; 0.97) | 3.0E-02 |
| cg10316877 | <i>FBXO31</i>   | chr16 | Body    | 0.69 | (0.49; 0.97) | 3.0E-02 |
| cg10316877 | <i>FBXO31</i>   | chr16 | 5'UTR   | 0.69 | (0.49; 0.97) | 3.0E-02 |
| cg07060175 | <i>TENM2</i>    | chr5  | Body    | 1.4  | (1.03; 1.91) | 3.1E-02 |
| cg05180009 | <i>CDH13</i>    | chr16 | Body    | 0.67 | (0.47; 0.96) | 3.1E-02 |
| cg08211967 | <i>AKAP13</i>   | chr15 | TSS200  | 1.45 | (1.03; 2.03) | 3.1E-02 |
| cg18156396 | <i>WWOX</i>     | chr16 | Body    | 0.67 | (0.47; 0.96) | 3.1E-02 |
| cg07584721 | <i>POU2F1</i>   | chr1  | Body    | 0.41 | (0.19; 0.92) | 3.1E-02 |
| cg03330374 | <i>PTPRN2</i>   | chr7  | Body    | 0.73 | (0.55; 0.97) | 3.1E-02 |
| cg20983647 | <i>PTPRN2</i>   | chr7  | Body    | 0.66 | (0.45; 0.96) | 3.1E-02 |
| cg10073916 | <i>NOL4L</i>    | chr20 | Body    | 1.51 | (1.04; 2.19) | 3.1E-02 |
| cg01595298 | <i>TNR</i>      | chr1  | 5'UTR   | 0.67 | (0.46; 0.96) | 3.1E-02 |
| cg21325485 | <i>PTPRN2</i>   | chr7  | Body    | 1.42 | (1.03; 1.96) | 3.1E-02 |
| cg14183712 | <i>PTPRN2</i>   | chr7  | Body    | 1.39 | (1.03; 1.89) | 3.2E-02 |
| cg09077317 | <i>CTDSPL</i>   | chr3  | Body    | 1.58 | (1.04; 2.4)  | 3.2E-02 |
| cg01880569 | <i>CDH13</i>    | chr16 | TSS1500 | 0.68 | (0.48; 0.97) | 3.2E-02 |
| cg02420724 | <i>COL5A2</i>   | chr2  | TSS1500 | 0.67 | (0.47; 0.97) | 3.2E-02 |
| cg04403629 | <i>ZBTB20</i>   | chr3  | TSS1500 | 0.67 | (0.46; 0.97) | 3.2E-02 |
| cg17692125 | <i>BARX2</i>    | chr11 | TSS1500 | 0.67 | (0.47; 0.97) | 3.2E-02 |
| cg00150128 | <i>TNRC6C</i>   | chr17 | TSS1500 | 1.49 | (1.04; 2.14) | 3.2E-02 |
| cg21606115 | <i>PTPRN2</i>   | chr7  | Body    | 0.68 | (0.48; 0.97) | 3.2E-02 |
| cg24093300 | <i>PTPRN2</i>   | chr7  | Body    | 1.48 | (1.03; 2.12) | 3.2E-02 |
| cg14086681 | <i>PTPRN2</i>   | chr7  | Body    | 0.72 | (0.54; 0.97) | 3.2E-02 |
| cg05475712 | <i>CHCHD6</i>   | chr3  | Body    | 1.44 | (1.03; 2.01) | 3.2E-02 |
| cg12076945 | <i>RAP1B</i>    | chr12 | 5'UTR   | 0.71 | (0.52; 0.97) | 3.2E-02 |
| cg04486528 | <i>CNTNAP2</i>  | chr7  | Body    | 0.71 | (0.51; 0.97) | 3.2E-02 |
| cg22302675 | <i>PTPRN2</i>   | chr7  | Body    | 1.39 | (1.03; 1.88) | 3.3E-02 |
| cg16278604 | <i>CTNND2</i>   | chr5  | Body    | 0.64 | (0.43; 0.96) | 3.3E-02 |
| cg07031120 | <i>PHACTR1</i>  | chr6  | TSS1500 | 0.68 | (0.48; 0.97) | 3.3E-02 |
| cg21867714 | <i>TNRC18</i>   | chr7  | Body    | 0.67 | (0.46; 0.97) | 3.3E-02 |
| cg06703980 | <i>CHCHD6</i>   | chr3  | Body    | 1.5  | (1.03; 2.18) | 3.3E-02 |



|            |                  |       |         |      |              |         |
|------------|------------------|-------|---------|------|--------------|---------|
| cg13328862 | <i>ATP8A1</i>    | chr4  | Body    | 0.55 | (0.32; 0.95) | 3.3E-02 |
| cg11900210 | <i>BRUNOL4</i>   | chr18 | Body    | 1.7  | (1.04; 2.77) | 3.3E-02 |
| cg06712763 | <i>TNFRSF12A</i> | chr16 | TSS1500 | 0.62 | (0.4; 0.96)  | 3.3E-02 |
| cg19027985 | <i>PTPRN2</i>    | chr7  | Body    | 1.49 | (1.03; 2.15) | 3.3E-02 |
| cg15439038 | <i>MBD5</i>      | chr2  | 5'UTR   | 0.66 | (0.45; 0.97) | 3.3E-02 |
| cg14724283 | <i>PTPRU</i>     | chr1  | Body    | 1.41 | (1.03; 1.95) | 3.3E-02 |
| cg15334096 | <i>PTPRN2</i>    | chr7  | Body    | 1.45 | (1.03; 2.05) | 3.3E-02 |
| cg06423822 | <i>PTPRN2</i>    | chr7  | Body    | 0.67 | (0.46; 0.97) | 3.3E-02 |
| cg08954025 | <i>PTPRN2</i>    | chr7  | Body    | 0.7  | (0.5; 0.97)  | 3.3E-02 |
| cg12344326 | <i>SGIP1</i>     | chr1  | Body    | 0.7  | (0.5; 0.97)  | 3.3E-02 |
| cg11410032 | <i>CTNND2</i>    | chr5  | 3'UTR   | 1.56 | (1.04; 2.34) | 3.4E-02 |
| cg21626408 | <i>TAOK3</i>     | chr12 | 5'UTR   | 0.71 | (0.51; 0.97) | 3.4E-02 |
| cg25699602 | <i>NRXN1</i>     | chr2  | 5'UTR   | 0.7  | (0.5; 0.97)  | 3.4E-02 |
| cg05529201 | <i>FBXO31</i>    | chr16 | Body    | 1.48 | (1.03; 2.13) | 3.4E-02 |
| cg02024855 | <i>PTPRN2</i>    | chr7  | Body    | 1.45 | (1.03; 2.05) | 3.4E-02 |
| cg20334079 | <i>TNFRSF19</i>  | chr13 | TSS200  | 0.68 | (0.48; 0.97) | 3.4E-02 |
| cg08454053 | <i>RTN4RL1</i>   | chr17 | Body    | 0.61 | (0.39; 0.96) | 3.4E-02 |
| cg16684217 | <i>PHACTR1</i>   | chr6  | Body    | 1.99 | (1.05; 3.78) | 3.4E-02 |
| cg12975130 | <i>RNU5E-1</i>   | chr5  | Body    | 1.46 | (1.03; 2.09) | 3.4E-02 |
| cg20891097 | <i>MEIS2</i>     | chr15 | 5'UTR   | 1.45 | (1.03; 2.04) | 3.5E-02 |
| cg20891097 | <i>MEIS2</i>     | chr15 | 1stExon | 1.45 | (1.03; 2.04) | 3.5E-02 |
| cg20891097 | <i>MEIS2</i>     | chr15 | Body    | 1.45 | (1.03; 2.04) | 3.5E-02 |
| cg20891097 | <i>MEIS2</i>     | chr15 | TSS1500 | 1.45 | (1.03; 2.04) | 3.5E-02 |
| cg15397975 | <i>NRXN1</i>     | chr2  | Body    | 1.82 | (1.04; 3.17) | 3.5E-02 |
| cg07834314 | <i>GNA12</i>     | chr7  | Body    | 0.72 | (0.53; 0.98) | 3.5E-02 |
| cg10459548 | <i>CUX2</i>      | chr12 | Body    | 0.69 | (0.48; 0.97) | 3.5E-02 |
| cg26784211 | <i>TNRC6B</i>    | chr22 | Body    | 0.57 | (0.34; 0.96) | 3.5E-02 |
| cg12804517 | <i>CHD6</i>      | chr20 | 5'UTR   | 0.62 | (0.39; 0.97) | 3.5E-02 |
| cg12181907 | <i>TAOK3</i>     | chr12 | Body    | 0.55 | (0.31; 0.96) | 3.5E-02 |
| cg10567625 | <i>CHCHD6</i>    | chr3  | Body    | 1.47 | (1.03; 2.09) | 3.5E-02 |
| cg17330843 | <i>TNFRSF1A</i>  | chr12 | TSS1500 | 0.71 | (0.51; 0.98) | 3.5E-02 |
| cg06409588 | <i>CSMD2</i>     | chr1  | ExonBnd | 0.64 | (0.42; 0.97) | 3.5E-02 |
| cg06409588 | <i>CSMD2</i>     | chr1  | Body    | 0.64 | (0.42; 0.97) | 3.5E-02 |
| cg10322560 | <i>PTPRN2</i>    | chr7  | Body    | 1.42 | (1.02; 1.98) | 3.5E-02 |
| cg06400095 | <i>SMARCD3</i>   | chr7  | Body    | 2.04 | (1.05; 3.98) | 3.5E-02 |
| cg18332814 | <i>TNFRSF19</i>  | chr13 | 3'UTR   | 0.65 | (0.43; 0.97) | 3.6E-02 |
| cg27555525 | <i>PTPRS</i>     | chr19 | Body    | 1.52 | (1.03; 2.24) | 3.6E-02 |
| cg10856813 | <i>SUSD4</i>     | chr1  | 1stExon | 0.66 | (0.45; 0.97) | 3.6E-02 |
| cg10856813 | <i>SUSD4</i>     | chr1  | 5'UTR   | 0.66 | (0.45; 0.97) | 3.6E-02 |
| cg22630180 | <i>CREBBP</i>    | chr16 | Body    | 1.45 | (1.02; 2.04) | 3.6E-02 |
| cg09170652 | <i>GOLT1B</i>    | chr12 | Body    | 1.54 | (1.03; 2.31) | 3.6E-02 |
| cg09170652 | <i>RECQL</i>     | chr12 | TSS1500 | 1.54 | (1.03; 2.31) | 3.6E-02 |
| cg05144259 | <i>PTPRN2</i>    | chr7  | Body    | 1.42 | (1.02; 1.97) | 3.6E-02 |
| cg00504595 | <i>TNFRSF19</i>  | chr13 | 5'UTR   | 0.68 | (0.47; 0.98) | 3.6E-02 |
| cg00504595 | <i>TNFRSF19</i>  | chr13 | 1stExon | 0.68 | (0.47; 0.98) | 3.6E-02 |
| cg01516459 | <i>PHACTR1</i>   | chr6  | Body    | 1.78 | (1.04; 3.05) | 3.6E-02 |
| cg23631556 | <i>PTPRN2</i>    | chr7  | Body    | 0.71 | (0.51; 0.98) | 3.6E-02 |
| cg11229352 | <i>CHCHD6</i>    | chr3  | Body    | 1.49 | (1.03; 2.16) | 3.6E-02 |
| cg01999622 | <i>PTPRN2</i>    | chr7  | Body    | 0.65 | (0.44; 0.97) | 3.7E-02 |
| cg25246636 | <i>SGIP1</i>     | chr1  | Body    | 0.68 | (0.47; 0.98) | 3.7E-02 |
| cg06524757 | <i>DACH1</i>     | chr13 | TSS200  | 0.65 | (0.43; 0.97) | 3.7E-02 |
| cg06571425 | <i>CUX2</i>      | chr12 | Body    | 1.45 | (1.02; 2.05) | 3.7E-02 |
| cg15517030 | <i>CTNND2</i>    | chr5  | Body    | 0.66 | (0.44; 0.97) | 3.7E-02 |
| cg22406012 | <i>NDUFA9</i>    | chr12 | TSS200  | 1.43 | (1.02; 1.99) | 3.7E-02 |
| cg08789220 | <i>RTN4RL2</i>   | chr11 | TSS200  | 1.4  | (1.02; 1.93) | 3.7E-02 |
| cg00566158 | <i>PTPRN2</i>    | chr7  | Body    | 1.47 | (1.02; 2.1)  | 3.7E-02 |
| cg24996339 | <i>PHACTR1</i>   | chr6  | 3'UTR   | 0.7  | (0.5; 0.98)  | 3.7E-02 |
| cg07689148 | <i>TNRC6A</i>    | chr16 | Body    | 1.57 | (1.03; 2.41) | 3.8E-02 |
| cg05688350 | <i>PHACTR1</i>   | chr6  | ExonBnd | 0.33 | (0.12; 0.94) | 3.8E-02 |
| cg05688350 | <i>PHACTR1</i>   | chr6  | Body    | 0.33 | (0.12; 0.94) | 3.8E-02 |
| cg05085782 | <i>UNC80</i>     | chr2  | TSS1500 | 0.67 | (0.46; 0.98) | 3.8E-02 |



|            |                  |       |         |      |              |         |
|------------|------------------|-------|---------|------|--------------|---------|
| cg08573562 | <i>PTPRN2</i>    | chr7  | Body    | 0.65 | (0.44; 0.98) | 3.8E-02 |
| cg07677545 | <i>ALCAM</i>     | chr3  | Body    | 0.7  | (0.5; 0.98)  | 3.8E-02 |
| cg07313835 | <i>POU2F1</i>    | chr1  | Body    | 0.7  | (0.5; 0.98)  | 3.8E-02 |
| cg01883164 | <i>TENM2</i>     | chr5  | Body    | 0.71 | (0.51; 0.98) | 3.8E-02 |
| cg14556531 | <i>MEIS2</i>     | chr15 | 5'UTR   | 1.49 | (1.02; 2.17) | 3.8E-02 |
| cg14556531 | <i>MEIS2</i>     | chr15 | 1stExon | 1.49 | (1.02; 2.17) | 3.8E-02 |
| cg14556531 | <i>MEIS2</i>     | chr15 | Body    | 1.49 | (1.02; 2.17) | 3.8E-02 |
| cg14556531 | <i>MEIS2</i>     | chr15 | TSS1500 | 1.49 | (1.02; 2.17) | 3.8E-02 |
| cg11008701 | <i>PTPRN2</i>    | chr7  | Body    | 0.68 | (0.48; 0.98) | 3.8E-02 |
| cg21426559 | <i>CUX2</i>      | chr12 | Body    | 0.59 | (0.36; 0.97) | 3.8E-02 |
| cg08008931 | <i>NRXN1</i>     | chr2  | 5'UTR   | 0.68 | (0.48; 0.98) | 3.8E-02 |
| cg08008931 | <i>NRXN1</i>     | chr2  | 1stExon | 0.68 | (0.48; 0.98) | 3.8E-02 |
| cg26735980 | <i>CDH13</i>     | chr16 | Body    | 0.71 | (0.51; 0.98) | 3.9E-02 |
| cg05482502 | <i>PTPRN2</i>    | chr7  | Body    | 0.69 | (0.48; 0.98) | 3.9E-02 |
| cg24673769 | <i>CHCHD6</i>    | chr3  | Body    | 0.67 | (0.45; 0.98) | 3.9E-02 |
| cg20177355 | <i>MEIS2</i>     | chr15 | Body    | 0.63 | (0.41; 0.98) | 3.9E-02 |
| cg01471034 | <i>CHD6</i>      | chr20 | 5'UTR   | 1.43 | (1.02; 2.02) | 3.9E-02 |
| cg12368062 | <i>CHD6</i>      | chr20 | Body    | 0.63 | (0.4; 0.98)  | 3.9E-02 |
| cg06320135 | <i>NOL4L</i>     | chr20 | 1stExon | 0.7  | (0.49; 0.98) | 3.9E-02 |
| cg23819092 | <i>MEX3A</i>     | chr1  | Body    | 1.45 | (1.02; 2.06) | 3.9E-02 |
| cg04338042 | <i>TNFRSF10B</i> | chr8  | TSS200  | 0.72 | (0.52; 0.98) | 3.9E-02 |
| cg14449833 | <i>PTPRS</i>     | chr19 | Body    | 1.57 | (1.02; 2.41) | 3.9E-02 |
| cg21192063 | <i>SMARCD3</i>   | chr7  | Body    | 0.6  | (0.37; 0.97) | 3.9E-02 |
| cg27105304 | <i>PTPRN2</i>    | chr7  | Body    | 0.71 | (0.51; 0.98) | 3.9E-02 |
| cg14717305 | <i>HMGB4</i>     | chr1  | TSS200  | 0.7  | (0.49; 0.98) | 4.0E-02 |
| cg14717305 | <i>CSMD2</i>     | chr1  | Body    | 0.7  | (0.49; 0.98) | 4.0E-02 |
| cg13806256 | <i>PDE8A</i>     | chr15 | 5'UTR   | 1.61 | (1.02; 2.52) | 4.0E-02 |
| cg13806256 | <i>PDE8A</i>     | chr15 | Body    | 1.61 | (1.02; 2.52) | 4.0E-02 |
| cg15083678 | <i>CACNA1C</i>   | chr12 | Body    | 1.42 | (1.02; 1.97) | 4.0E-02 |
| cg00721125 | <i>FBXO31</i>    | chr16 | Body    | 1.4  | (1.02; 1.93) | 4.0E-02 |
| cg00721125 | <i>FBXO31</i>    | chr16 | TSS200  | 1.4  | (1.02; 1.93) | 4.0E-02 |
| cg18766475 | <i>CEP350</i>    | chr1  | TSS1500 | 1.5  | (1.02; 2.2)  | 4.0E-02 |
| cg02546607 | <i>WWOX</i>      | chr16 | Body    | 1.6  | (1.02; 2.52) | 4.0E-02 |
| cg11504793 | <i>NOL4L</i>     | chr20 | Body    | 1.53 | (1.02; 2.31) | 4.0E-02 |
| cg00989220 | <i>TNFRSF1A</i>  | chr12 | Body    | 0.71 | (0.51; 0.98) | 4.0E-02 |
| cg10468535 | <i>PTPRN2</i>    | chr7  | Body    | 0.7  | (0.5; 0.98)  | 4.0E-02 |
| cg20045834 | <i>ELAVL4</i>    | chr1  | Body    | 0.71 | (0.51; 0.99) | 4.0E-02 |
| cg09258020 | <i>NRXN1</i>     | chr2  | Body    | 1.48 | (1.02; 2.15) | 4.1E-02 |
| cg16495675 | <i>RTN4</i>      | chr2  | TSS200  | 1.48 | (1.02; 2.14) | 4.1E-02 |
| cg16495675 | <i>RTN4</i>      | chr2  | Body    | 1.48 | (1.02; 2.14) | 4.1E-02 |
| cg19206986 | <i>ATP8A1</i>    | chr4  | 5'UTR   | 1.49 | (1.02; 2.18) | 4.1E-02 |
| cg19206986 | <i>ATP8A1</i>    | chr4  | 1stExon | 1.49 | (1.02; 2.18) | 4.1E-02 |
| cg18105702 | <i>CUX2</i>      | chr12 | Body    | 1.6  | (1.02; 2.5)  | 4.1E-02 |
| cg00289496 | <i>FBXO31</i>    | chr16 | 5'UTR   | 1.44 | (1.01; 2.03) | 4.1E-02 |
| cg10977989 | <i>CTNND2</i>    | chr5  | Body    | 0.66 | (0.45; 0.98) | 4.1E-02 |
| cg01218565 | <i>NOL4L</i>     | chr20 | Body    | 1.5  | (1.02; 2.22) | 4.1E-02 |
| cg01218565 | <i>NOL4L</i>     | chr20 | TSS1500 | 1.5  | (1.02; 2.22) | 4.1E-02 |
| cg15604008 | <i>SRSF10</i>    | chr1  | TSS200  | 0.74 | (0.55; 0.99) | 4.1E-02 |
| cg08894980 | <i>CUX2</i>      | chr12 | Body    | 0.68 | (0.46; 0.98) | 4.1E-02 |
| cg22560937 | <i>RNU5E-1</i>   | chr5  | Body    | 0.67 | (0.46; 0.98) | 4.1E-02 |
| cg02183851 | <i>TNRC6A</i>    | chr16 | Body    | 0.66 | (0.45; 0.99) | 4.2E-02 |
| cg15531497 | <i>FBXO11</i>    | chr2  | TSS1500 | 0.72 | (0.52; 0.99) | 4.2E-02 |
| cg02518760 | <i>NOL4</i>      | chr18 | Body    | 1.45 | (1.01; 2.08) | 4.2E-02 |
| cg06003986 | <i>BRUNOL4</i>   | chr18 | Body    | 0.65 | (0.43; 0.98) | 4.2E-02 |
| cg23906085 | <i>FBXO36</i>    | chr2  | Body    | 1.38 | (1.01; 1.89) | 4.2E-02 |
| cg12229458 | <i>MTNR1B</i>    | chr11 | Body    | 0.7  | (0.49; 0.99) | 4.2E-02 |
| cg20065718 | <i>CHFR</i>      | chr12 | Body    | 1.53 | (1.01; 2.31) | 4.2E-02 |
| cg21929771 | <i>PTPRU</i>     | chr1  | Body    | 0.71 | (0.51; 0.99) | 4.2E-02 |
| cg09254768 | <i>FBXO38</i>    | chr5  | 5'UTR   | 0.67 | (0.45; 0.99) | 4.3E-02 |
| cg26337914 | <i>PTPRN2</i>    | chr7  | Body    | 1.47 | (1.01; 2.14) | 4.3E-02 |
| cg25630635 | <i>DMXL2</i>     | chr15 | Body    | 0.68 | (0.47; 0.99) | 4.3E-02 |



|            |                  |       |         |      |              |         |
|------------|------------------|-------|---------|------|--------------|---------|
| cg24780101 | <i>CDH13</i>     | chr16 | Body    | 1.42 | (1.01; 1.99) | 4.3E-02 |
| cg07093496 | <i>TNRC6C</i>    | chr17 | 5'UTR   | 0.54 | (0.3; 0.98)  | 4.3E-02 |
| cg20908993 | <i>EIF2S1</i>    | chr14 | TSS1500 | 0.68 | (0.47; 0.99) | 4.3E-02 |
| cg15819410 | <i>PTPRN2</i>    | chr7  | Body    | 0.7  | (0.5; 0.99)  | 4.4E-02 |
| cg07096868 | <i>ACVR2A</i>    | chr2  | 5'UTR   | 1.58 | (1.01; 2.48) | 4.4E-02 |
| cg07096868 | <i>ACVR2A</i>    | chr2  | Body    | 1.58 | (1.01; 2.48) | 4.4E-02 |
| cg06771303 | <i>TNRC18</i>    | chr7  | Body    | 1.58 | (1.01; 2.47) | 4.4E-02 |
| cg08895845 | <i>TNFRSF11A</i> | chr18 | Body    | 0.66 | (0.45; 0.99) | 4.4E-02 |
| cg05166028 | <i>PTPRN2</i>    | chr7  | Body    | 1.44 | (1.01; 2.05) | 4.4E-02 |
| cg07738938 | <i>TNRC18</i>    | chr7  | Body    | 0.71 | (0.51; 0.99) | 4.4E-02 |
| cg16093065 | <i>TNRC6B</i>    | chr22 | 3'UTR   | 0.57 | (0.33; 0.99) | 4.4E-02 |
| cg08493049 | <i>SUGCT</i>     | chr7  | Body    | 0.69 | (0.49; 0.99) | 4.4E-02 |
| cg00771867 | <i>PTPRN2</i>    | chr7  | Body    | 1.42 | (1.01; 2)    | 4.5E-02 |
| cg03473125 | <i>PTPRN2</i>    | chr7  | Body    | 1.39 | (1.01; 1.92) | 4.5E-02 |
| cg10159648 | <i>PTPRN2</i>    | chr7  | Body    | 1.38 | (1.01; 1.9)  | 4.5E-02 |
| cg08668411 | <i>PDE8A</i>     | chr15 | TSS200  | 0.63 | (0.4; 0.99)  | 4.5E-02 |
| cg08668411 | <i>PDE8A</i>     | chr15 | 5'UTR   | 0.63 | (0.4; 0.99)  | 4.5E-02 |
| cg00906088 | <i>CHCHD6</i>    | chr3  | TSS200  | 1.46 | (1.01; 2.13) | 4.5E-02 |
| cg02306526 | <i>CACNA1C</i>   | chr12 | Body    | 0.7  | (0.49; 0.99) | 4.5E-02 |
| cg14853265 | <i>CHFR</i>      | chr12 | Body    | 0.73 | (0.54; 0.99) | 4.5E-02 |
| cg01670430 | <i>GNA12</i>     | chr7  | Body    | 0.62 | (0.38; 0.99) | 4.5E-02 |
| cg08197956 | <i>RTN4RL1</i>   | chr17 | 3'UTR   | 1.49 | (1.01; 2.2)  | 4.5E-02 |
| cg02295261 | <i>NOL4L</i>     | chr20 | Body    | 1.43 | (1.01; 2.03) | 4.5E-02 |
| cg16910830 | <i>CNTNAP2</i>   | chr7  | TSS200  | 1.69 | (1.01; 2.82) | 4.5E-02 |
| cg19218679 | <i>CUX2</i>      | chr12 | Body    | 1.85 | (1.01; 3.37) | 4.5E-02 |
| cg07062711 | <i>MEIS2</i>     | chr15 | 5'UTR   | 1.41 | (1.01; 1.97) | 4.5E-02 |
| cg07062711 | <i>MEIS2</i>     | chr15 | 1stExon | 1.41 | (1.01; 1.97) | 4.5E-02 |
| cg07062711 | <i>MEIS2</i>     | chr15 | TSS1500 | 1.41 | (1.01; 1.97) | 4.5E-02 |
| cg22810156 | <i>AKAP13</i>    | chr15 | Body    | 0.68 | (0.47; 0.99) | 4.5E-02 |
| cg22277103 | <i>PTPRN2</i>    | chr7  | Body    | 1.5  | (1.01; 2.23) | 4.5E-02 |
| cg14898177 | <i>CACNA1C</i>   | chr12 | Body    | 0.64 | (0.41; 0.99) | 4.6E-02 |
| cg27476859 | <i>GNA12</i>     | chr7  | Body    | 0.72 | (0.53; 0.99) | 4.6E-02 |
| cg08571531 | <i>FBXO31</i>    | chr16 | TSS1500 | 0.72 | (0.53; 0.99) | 4.6E-02 |
| cg15704204 | <i>TENM2</i>     | chr5  | Body    | 0.72 | (0.52; 0.99) | 4.6E-02 |
| cg14003853 | <i>AKAP13</i>    | chr15 | Body    | 0.71 | (0.51; 0.99) | 4.6E-02 |
| cg25743622 | <i>SUSD4</i>     | chr1  | Body    | 1.68 | (1.01; 2.8)  | 4.6E-02 |
| cg11783003 | <i>ATF7IP</i>    | chr12 | 5'UTR   | 0.71 | (0.51; 0.99) | 4.6E-02 |
| cg11783003 | <i>ATF7IP</i>    | chr12 | Body    | 0.71 | (0.51; 0.99) | 4.6E-02 |
| cg10762511 | <i>RECQL5</i>    | chr17 | Body    | 1.51 | (1.01; 2.27) | 4.6E-02 |
| cg19985495 | <i>CDH13</i>     | chr16 | 5'UTR   | 0.6  | (0.37; 0.99) | 4.6E-02 |
| cg19985495 | <i>CDH13</i>     | chr16 | Body    | 0.6  | (0.37; 0.99) | 4.6E-02 |
| cg12161045 | <i>TNFRSF1B</i>  | chr1  | Body    | 1.6  | (1.01; 2.54) | 4.6E-02 |
| cg02666246 | <i>PTPRN2</i>    | chr7  | Body    | 1.36 | (1; 1.85)    | 4.7E-02 |
| cg03951877 | <i>PHACTR1</i>   | chr6  | Body    | 1.44 | (1.01; 2.07) | 4.7E-02 |
| cg07600871 | <i>BRUNOL4</i>   | chr18 | TSS1500 | 1.39 | (1; 1.92)    | 4.7E-02 |
| cg18026197 | <i>CHCHD6</i>    | chr3  | TSS1500 | 1.4  | (1; 1.95)    | 4.7E-02 |
| cg04106255 | <i>SGIP1</i>     | chr1  | Body    | 0.7  | (0.5; 1)     | 4.7E-02 |
| cg15197582 | <i>TNFRSF11A</i> | chr18 | Body    | 1.44 | (1; 2.06)    | 4.7E-02 |
| cg12164753 | <i>CTDSPL2</i>   | chr15 | 1stExon | 1.45 | (1; 2.11)    | 4.7E-02 |
| cg12164753 | <i>CTDSPL2</i>   | chr15 | 5'UTR   | 1.45 | (1; 2.11)    | 4.7E-02 |
| cg04237822 | <i>PTPRN2</i>    | chr7  | Body    | 1.4  | (1; 1.96)    | 4.7E-02 |
| cg11534937 | <i>TNRC18</i>    | chr7  | TSS1500 | 0.73 | (0.54; 1)    | 4.7E-02 |
| cg05874111 | <i>CUX2</i>      | chr12 | Body    | 1.45 | (1; 2.1)     | 4.8E-02 |
| cg18369715 | <i>PTPRN2</i>    | chr7  | Body    | 0.66 | (0.43; 1)    | 4.8E-02 |
| cg04215870 | <i>SLC16A9</i>   | chr10 | 5'UTR   | 0.73 | (0.54; 1)    | 4.8E-02 |
| cg17287605 | <i>PTPRN2</i>    | chr7  | Body    | 0.64 | (0.42; 1)    | 4.8E-02 |
| cg04081153 | <i>ARID1A</i>    | chr1  | TSS1500 | 0.65 | (0.43; 1)    | 4.8E-02 |
| cg18537923 | <i>ZBTB20</i>    | chr3  | Body    | 0.67 | (0.45; 1)    | 4.8E-02 |
| cg18537923 | <i>ZBTB20</i>    | chr3  | 5'UTR   | 0.67 | (0.45; 1)    | 4.8E-02 |
| cg01518344 | <i>FBXO34</i>    | chr14 | 5'UTR   | 0.71 | (0.51; 1)    | 4.8E-02 |
| cg16537155 | <i>ERI3</i>      | chr1  | Body    | 0.64 | (0.41; 1)    | 4.8E-02 |



|            |          |       |         |      |              |         |
|------------|----------|-------|---------|------|--------------|---------|
| cg05308829 | GNA12    | chr7  | Body    | 0.72 | (0.52; 1)    | 4.8E-02 |
| cg03894650 | CTNND2   | chr5  | Body    | 0.72 | (0.52; 1)    | 4.8E-02 |
| cg24794412 | EIF2S1   | chr14 | TSS200  | 0.71 | (0.5; 1)     | 4.8E-02 |
| cg05226390 | ELAVL4   | chr1  | TSS1500 | 0.67 | (0.45; 1)    | 4.8E-02 |
| cg05226390 | ELAVL4   | chr1  | Body    | 0.67 | (0.45; 1)    | 4.8E-02 |
| cg17904068 | CHFR     | chr12 | Body    | 0.72 | (0.52; 1)    | 4.8E-02 |
| cg07517487 | TNFRSF19 | chr13 | 5'UTR   | 1.44 | (1; 2.07)    | 4.8E-02 |
| cg07517487 | TNFRSF19 | chr13 | TSS200  | 1.44 | (1; 2.07)    | 4.8E-02 |
| cg19056691 | CUX2     | chr12 | Body    | 0.63 | (0.4; 1)     | 4.9E-02 |
| cg24723255 | TAOK3    | chr12 | Body    | 1.4  | (1; 1.95)    | 4.9E-02 |
| cg13196844 | PHACTR1  | chr6  | Body    | 1.55 | (1; 2.4)     | 4.9E-02 |
| cg17750024 | TNR      | chr1  | 5'UTR   | 0.69 | (0.47; 1)    | 4.9E-02 |
| cg03879109 | CREBBP   | chr16 | 3'UTR   | 0.7  | (0.49; 1)    | 4.9E-02 |
| cg00935267 | PTPRN2   | chr7  | Body    | 0.68 | (0.47; 1)    | 4.9E-02 |
| cg19766638 | NOL4     | chr18 | 5'UTR   | 0.68 | (0.46; 1)    | 4.9E-02 |
| cg19766638 | NOL4     | chr18 | Body    | 0.68 | (0.46; 1)    | 4.9E-02 |
| cg19766638 | NOL4     | chr18 | 1stExon | 0.68 | (0.46; 1)    | 4.9E-02 |
| cg26391891 | TNFRSF1A | chr12 | Body    | 1.55 | (1; 2.39)    | 4.9E-02 |
| cg03352776 | CUX2     | chr12 | TSS1500 | 0.71 | (0.5; 1)     | 4.9E-02 |
| cg12286857 | PTPRN2   | chr7  | Body    | 1.39 | (1; 1.94)    | 4.9E-02 |
| cg23093175 | ZBTB20   | chr3  | TSS1500 | 0.71 | (0.51; 1)    | 4.9E-02 |
| cg23093175 | ZBTB20   | chr3  | Body    | 0.71 | (0.51; 1)    | 4.9E-02 |
| cg23093175 | ZBTB20   | chr3  | 5'UTR   | 0.71 | (0.51; 1)    | 4.9E-02 |
| cg03395724 | SUSD4    | chr1  | Body    | 0.71 | (0.5; 1)     | 4.9E-02 |
| cg13680200 | TNR      | chr1  | Body    | 0.67 | (0.45; 1)    | 5.0E-02 |
| cg12634594 | NRXN1    | chr2  | Body    | 1.48 | (1; 2.17)    | 5.0E-02 |
| cg08317883 | CUX2     | chr12 | Body    | 1.43 | (1; 2.04)    | 5.0E-02 |
| cg24535649 | CACNA1C  | chr12 | Body    | 0.71 | (0.51; 1)    | 5.0E-02 |
| cg10392504 | TNRC18   | chr7  | TSS1500 | 0.73 | (0.53; 1)    | 5.0E-02 |
| cg14942155 | PTPRN2   | chr7  | Body    | 1.59 | (1; 2.52)    | 5.0E-02 |
| cg05991442 | RECQL5   | chr17 | Body    | 0.73 | (0.54; 1)    | 5.0E-02 |
| cg00864064 | SMARCD3  | chr7  | TSS200  | 1.37 | (1; 1.87)    | 5.0E-02 |
| cg00864064 | SMARCD3  | chr7  | TSS1500 | 1.37 | (1; 1.87)    | 5.0E-02 |
| cg14086205 | NOL4     | chr18 | 5'UTR   | 0.71 | (0.5; 1)     | 5.0E-02 |
| cg14086205 | NOL4     | chr18 | Body    | 0.71 | (0.5; 1)     | 5.0E-02 |
| cg19026593 | TNFRSF1A | chr12 | Body    | 0.69 | (0.48; 1)    | 5.0E-02 |
| cg09571420 | CNTNAP2  | chr7  | TSS1500 | 0.69 | (0.48; 1)    | 5.0E-02 |
| cg06286135 | PTPRN2   | chr7  | Body    | 1.41 | (1; 2)       | 5.0E-02 |
| cg06631944 | PTPRN2   | chr7  | Body    | 1.39 | (1; 1.94)    | 5.1E-02 |
| cg02058924 | CHFR     | chr12 | TSS1500 | 1.38 | (1; 1.92)    | 5.1E-02 |
| cg23805664 | UNC80    | chr2  | Body    | 1.43 | (1; 2.04)    | 5.1E-02 |
| cg01093138 | CDH13    | chr16 | Body    | 0.74 | (0.55; 1)    | 5.1E-02 |
| cg04713531 | PTPRN2   | chr7  | Body    | 0.67 | (0.44; 1)    | 5.1E-02 |
| cg26051910 | SUSD4    | chr1  | Body    | 0.63 | (0.39; 1)    | 5.1E-02 |
| cg17334266 | PTPRN2   | chr7  | Body    | 0.75 | (0.56; 1)    | 5.1E-02 |
| cg03150319 | CREBBP   | chr16 | Body    | 1.38 | (1; 1.92)    | 5.1E-02 |
| cg07879612 | PTPRN2   | chr7  | Body    | 1.34 | (1; 1.8)     | 5.1E-02 |
| cg08819065 | ZBTB20   | chr3  | Body    | 1.37 | (1; 1.89)    | 5.1E-02 |
| cg23916626 | SUGCT    | chr7  | Body    | 0.73 | (0.53; 1)    | 5.1E-02 |
| cg18887119 | CREBBP   | chr16 | Body    | 1.39 | (1; 1.94)    | 5.1E-02 |
| cg26302009 | PHACTR1  | chr6  | Body    | 1.46 | (1; 2.15)    | 5.2E-02 |
| cg07040435 | TNFRSF19 | chr13 | 5'UTR   | 1.52 | (1; 2.33)    | 5.2E-02 |
| cg07040435 | TNFRSF19 | chr13 | TSS1500 | 1.52 | (1; 2.33)    | 5.2E-02 |
| cg04950452 | TENM2    | chr5  | Body    | 0.68 | (0.45; 1)    | 5.2E-02 |
| cg05083624 | TNRC6B   | chr22 | 3'UTR   | 0.54 | (0.29; 1.01) | 5.2E-02 |
| cg09656981 | ELAVL4   | chr1  | TSS200  | 1.4  | (1; 1.96)    | 5.2E-02 |
| cg09656981 | ELAVL4   | chr1  | Body    | 1.4  | (1; 1.96)    | 5.2E-02 |
| cg15554126 | PEX14    | chr1  | 3'UTR   | 1.4  | (1; 1.96)    | 5.2E-02 |
| cg10151741 | PTPRS    | chr19 | 1stExon | 0.45 | (0.2; 1.01)  | 5.2E-02 |
| cg10151741 | PTPRS    | chr19 | 5'UTR   | 0.45 | (0.2; 1.01)  | 5.2E-02 |
| cg22721472 | TSHZ3    | chr19 | 3'UTR   | 0.71 | (0.51; 1)    | 5.2E-02 |



|            |                |       |         |      |              |         |
|------------|----------------|-------|---------|------|--------------|---------|
| cg01554539 | <i>PTPRN2</i>  | chr7  | Body    | 0.69 | (0.48; 1)    | 5.2E-02 |
| cg23343389 | <i>PTPRN2</i>  | chr7  | Body    | 0.71 | (0.51; 1)    | 5.2E-02 |
| cg03894975 | <i>PTPRU</i>   | chr1  | Body    | 0.73 | (0.53; 1)    | 5.3E-02 |
| cg27571230 | <i>PEX14</i>   | chr1  | Body    | 1.41 | (1; 1.98)    | 5.3E-02 |
| cg20540557 | <i>BARX2</i>   | chr11 | Body    | 0.67 | (0.45; 1)    | 5.3E-02 |
| cg17527902 | <i>COL1A2</i>  | chr7  | Body    | 1.44 | (1; 2.09)    | 5.3E-02 |
| cg19067989 | <i>NRXN1</i>   | chr2  | 5'UTR   | 1.37 | (1; 1.88)    | 5.3E-02 |
| cg08898492 | <i>AKAP13</i>  | chr15 | Body    | 0.74 | (0.55; 1)    | 5.3E-02 |
| cg08898492 | <i>AKAP13</i>  | chr15 | 5'UTR   | 0.74 | (0.55; 1)    | 5.3E-02 |
| cg02329175 | <i>CTDSP2</i>  | chr12 | 1stExon | 0.68 | (0.45; 1.01) | 5.3E-02 |
| cg02329175 | <i>CTDSP2</i>  | chr12 | 5'UTR   | 0.68 | (0.45; 1.01) | 5.3E-02 |
| cg20931902 | <i>PTPRU</i>   | chr1  | Body    | 0.66 | (0.43; 1.01) | 5.3E-02 |
| cg05475027 | <i>WVOX</i>    | chr16 | Body    | 1.38 | (1; 1.91)    | 5.3E-02 |
| cg01396387 | <i>CDH13</i>   | chr16 | TSS200  | 0.64 | (0.41; 1.01) | 5.4E-02 |
| cg27183602 | <i>DCUN1D4</i> | chr4  | TSS200  | 0.68 | (0.46; 1.01) | 5.4E-02 |
| cg18998543 | <i>GNA12</i>   | chr7  | 3'UTR   | 0.49 | (0.23; 1.01) | 5.4E-02 |
| cg20548013 | <i>PHACTR1</i> | chr6  | Body    | 0.7  | (0.49; 1.01) | 5.4E-02 |
| cg05533447 | <i>WVOX</i>    | chr16 | Body    | 1.41 | (0.99; 1.99) | 5.4E-02 |
| cg22558134 | <i>PTPRN2</i>  | chr7  | Body    | 0.69 | (0.48; 1.01) | 5.4E-02 |
| cg13773631 | <i>BARX1</i>   | chr9  | Body    | 0.7  | (0.49; 1.01) | 5.4E-02 |
| cg13103340 | <i>FBXO31</i>  | chr16 | Body    | 0.75 | (0.55; 1.01) | 5.4E-02 |
| cg13103340 | <i>FBXO31</i>  | chr16 | 5'UTR   | 0.75 | (0.55; 1.01) | 5.4E-02 |
| cg08688512 | <i>MEIS2</i>   | chr15 | TSS1500 | 0.73 | (0.53; 1.01) | 5.4E-02 |
| cg18381465 | <i>FBXO32</i>  | chr8  | 1stExon | 0.73 | (0.53; 1.01) | 5.4E-02 |
| cg18381465 | <i>FBXO32</i>  | chr8  | ExonBnd | 0.73 | (0.53; 1.01) | 5.4E-02 |
| cg18381465 | <i>FBXO32</i>  | chr8  | 5'UTR   | 0.73 | (0.53; 1.01) | 5.4E-02 |
| cg18381465 | <i>FBXO32</i>  | chr8  | Body    | 0.73 | (0.53; 1.01) | 5.4E-02 |
| cg22057372 | <i>PTPRN2</i>  | chr7  | Body    | 1.38 | (0.99; 1.91) | 5.5E-02 |
| cg20602914 | <i>TNRC18</i>  | chr7  | Body    | 0.62 | (0.38; 1.01) | 5.5E-02 |
| cg10069437 | <i>WVOX</i>    | chr16 | Body    | 0.72 | (0.52; 1.01) | 5.5E-02 |
| cg14668986 | <i>ZBTB20</i>  | chr3  | Body    | 1.4  | (0.99; 1.96) | 5.5E-02 |
| cg14668986 | <i>ZBTB20</i>  | chr3  | 1stExon | 1.4  | (0.99; 1.96) | 5.5E-02 |
| cg14668986 | <i>ZBTB20</i>  | chr3  | 5'UTR   | 1.4  | (0.99; 1.96) | 5.5E-02 |
| cg22792862 | <i>EIF2S1</i>  | chr14 | 5'UTR   | 0.66 | (0.43; 1.01) | 5.5E-02 |
| cg22792862 | <i>EIF2S1</i>  | chr14 | 1stExon | 0.66 | (0.43; 1.01) | 5.5E-02 |
| cg16861365 | <i>AKAP13</i>  | chr15 | 5'UTR   | 1.41 | (0.99; 2.01) | 5.5E-02 |
| cg17095257 | <i>PDE8A</i>   | chr15 | Body    | 0.68 | (0.46; 1.01) | 5.5E-02 |
| cg18371428 | <i>PTPRN2</i>  | chr7  | Body    | 1.39 | (0.99; 1.95) | 5.5E-02 |
| cg11556740 | <i>SUGCT</i>   | chr7  | Body    | 0.66 | (0.43; 1.01) | 5.6E-02 |
| cg15207669 | <i>CSMD2</i>   | chr1  | Body    | 0.73 | (0.53; 1.01) | 5.6E-02 |
| cg20540042 | <i>POU2F1</i>  | chr1  | TSS200  | 0.74 | (0.55; 1.01) | 5.6E-02 |
| cg22165310 | <i>WAC</i>     | chr10 | Body    | 1.37 | (0.99; 1.9)  | 5.6E-02 |
| cg00271311 | <i>CNTF</i>    | chr11 | TSS1500 | 1.46 | (0.99; 2.15) | 5.6E-02 |
| cg26886268 | <i>PTPRN2</i>  | chr7  | Body    | 0.72 | (0.52; 1.01) | 5.6E-02 |
| cg01026915 | <i>NOL4L</i>   | chr20 | Body    | 0.31 | (0.09; 1.03) | 5.6E-02 |
| cg02464123 | <i>CTDSP2</i>  | chr12 | 1stExon | 0.69 | (0.47; 1.01) | 5.6E-02 |
| cg02464123 | <i>CTDSP2</i>  | chr12 | 5'UTR   | 0.69 | (0.47; 1.01) | 5.6E-02 |
| cg24364593 | <i>CSMD2</i>   | chr1  | Body    | 0.7  | (0.48; 1.01) | 5.6E-02 |
| cg17725607 | <i>PTPRU</i>   | chr1  | Body    | 1.46 | (0.99; 2.15) | 5.6E-02 |
| cg07263694 | <i>CUX2</i>    | chr12 | Body    | 1.38 | (0.99; 1.93) | 5.6E-02 |
| cg25364469 | <i>ZBTB20</i>  | chr3  | 5'UTR   | 0.7  | (0.48; 1.01) | 5.6E-02 |
| cg25364469 | <i>ZBTB20</i>  | chr3  | Body    | 0.7  | (0.48; 1.01) | 5.6E-02 |
| cg27230472 | <i>WVOX</i>    | chr16 | Body    | 1.45 | (0.99; 2.12) | 5.6E-02 |
| cg16765393 | <i>GNA12</i>   | chr7  | Body    | 0.71 | (0.5; 1.01)  | 5.6E-02 |
| cg26873115 | <i>CREBBP</i>  | chr16 | Body    | 0.72 | (0.52; 1.01) | 5.6E-02 |
| cg09229912 | <i>CUX2</i>    | chr12 | 1stExon | 0.69 | (0.47; 1.01) | 5.7E-02 |
| cg09229912 | <i>CUX2</i>    | chr12 | 5'UTR   | 0.69 | (0.47; 1.01) | 5.7E-02 |
| cg17086900 | <i>PTPRN2</i>  | chr7  | 3'UTR   | 1.38 | (0.99; 1.91) | 5.7E-02 |
| cg08924696 | <i>RTN4RL2</i> | chr11 | Body    | 0.72 | (0.52; 1.01) | 5.7E-02 |
| cg11586220 | <i>CDH13</i>   | chr16 | 5'UTR   | 0.67 | (0.45; 1.01) | 5.7E-02 |
| cg11586220 | <i>CDH13</i>   | chr16 | Body    | 0.67 | (0.45; 1.01) | 5.7E-02 |



|            |                |       |         |      |              |         |
|------------|----------------|-------|---------|------|--------------|---------|
| cg21280014 | <i>PTPRN2</i>  | chr7  | Body    | 1.34 | (0.99; 1.81) | 5.7E-02 |
| cg27585878 | <i>FBXO31</i>  | chr16 | Body    | 1.42 | (0.99; 2.03) | 5.7E-02 |
| cg14301531 | <i>CACNA1C</i> | chr12 | Body    | 0.7  | (0.49; 1.01) | 5.7E-02 |
| cg14286928 | <i>EIF2S1</i>  | chr14 | TSS1500 | 0.68 | (0.45; 1.01) | 5.7E-02 |
| cg12830684 | <i>PEX14</i>   | chr1  | Body    | 0.73 | (0.53; 1.01) | 5.7E-02 |
| cg18222509 | <i>ZNF704</i>  | chr8  | Body    | 1.41 | (0.99; 2.02) | 5.7E-02 |
| cg08628777 | <i>PTPRN2</i>  | chr7  | Body    | 1.31 | (0.99; 1.74) | 5.7E-02 |
| cg04739400 | <i>PTPRN2</i>  | chr7  | Body    | 0.73 | (0.53; 1.01) | 5.7E-02 |
| cg27051715 | <i>ZNF704</i>  | chr8  | Body    | 0.67 | (0.44; 1.01) | 5.7E-02 |
| cg17283542 | <i>PTPRN2</i>  | chr7  | Body    | 0.72 | (0.51; 1.01) | 5.8E-02 |
| cg00556715 | <i>AKAP13</i>  | chr15 | Body    | 1.49 | (0.99; 2.25) | 5.8E-02 |
| cg25107254 | <i>MTNR1A</i>  | chr4  | 1stExon | 0.6  | (0.35; 1.02) | 5.8E-02 |
| cg05406230 | <i>PEX14</i>   | chr1  | TSS1500 | 0.71 | (0.51; 1.01) | 5.8E-02 |
| cg11028633 | <i>PTPRN2</i>  | chr7  | Body    | 1.42 | (0.99; 2.05) | 5.8E-02 |
| cg24935409 | <i>PTPRN2</i>  | chr7  | Body    | 1.34 | (0.99; 1.81) | 5.8E-02 |
| cg01845277 | <i>ZNF704</i>  | chr8  | 3'UTR   | 1.41 | (0.99; 2.01) | 5.8E-02 |
| cg05334416 | <i>MEIS2</i>   | chr15 | Body    | 0.65 | (0.42; 1.01) | 5.8E-02 |
| cg27109989 | <i>PTPRN2</i>  | chr7  | Body    | 0.71 | (0.5; 1.01)  | 5.8E-02 |
| cg11147878 | <i>SUSD4</i>   | chr1  | Body    | 1.53 | (0.99; 2.38) | 5.8E-02 |
| cg11147878 | <i>SUSD4</i>   | chr1  | 3'UTR   | 1.53 | (0.99; 2.38) | 5.8E-02 |
| cg04643858 | <i>DNAI2</i>   | chr17 | Body    | 0.72 | (0.51; 1.01) | 5.8E-02 |
| cg17255108 | <i>PTPRN2</i>  | chr7  | Body    | 1.38 | (0.99; 1.91) | 5.8E-02 |
| cg07571977 | <i>ALCAM</i>   | chr3  | Body    | 0.72 | (0.52; 1.01) | 5.8E-02 |
| cg00368924 | <i>PTPRN2</i>  | chr7  | Body    | 1.36 | (0.99; 1.87) | 5.8E-02 |
| cg11854356 | <i>TAOK3</i>   | chr12 | Body    | 1.48 | (0.99; 2.22) | 5.9E-02 |
| cg14992320 | <i>PTPRN2</i>  | chr7  | Body    | 1.36 | (0.99; 1.88) | 5.9E-02 |
| cg26660036 | <i>PTPRS</i>   | chr19 | Body    | 1.36 | (0.99; 1.87) | 5.9E-02 |
| cg26154568 | <i>AKAP13</i>  | chr15 | Body    | 1.48 | (0.99; 2.22) | 5.9E-02 |
| cg23559222 | <i>ZFP91</i>   | chr11 | TSS1500 | 1.5  | (0.98; 2.27) | 5.9E-02 |
| cg12982767 | <i>SRSF10</i>  | chr1  | Body    | 0.43 | (0.18; 1.03) | 5.9E-02 |
| cg12982767 | <i>SRSF10</i>  | chr1  | 3'UTR   | 0.43 | (0.18; 1.03) | 5.9E-02 |
| cg26999577 | <i>CACNA1C</i> | chr12 | Body    | 0.74 | (0.53; 1.01) | 5.9E-02 |
| cg24453836 | <i>CEP350</i>  | chr1  | 1stExon | 0.74 | (0.55; 1.01) | 5.9E-02 |
| cg24453836 | <i>CEP350</i>  | chr1  | 5'UTR   | 0.74 | (0.55; 1.01) | 5.9E-02 |
| cg23910983 | <i>TDRP</i>    | chr8  | Body    | 0.65 | (0.41; 1.02) | 5.9E-02 |
| cg10958924 | <i>MEIS2</i>   | chr15 | 5'UTR   | 0.65 | (0.42; 1.02) | 5.9E-02 |
| cg10958924 | <i>MEIS2</i>   | chr15 | 1stExon | 0.65 | (0.42; 1.02) | 5.9E-02 |
| cg10958924 | <i>MEIS2</i>   | chr15 | Body    | 0.65 | (0.42; 1.02) | 5.9E-02 |
| cg10958924 | <i>MEIS2</i>   | chr15 | TSS1500 | 0.65 | (0.42; 1.02) | 5.9E-02 |
| cg09314071 | <i>PDE8A</i>   | chr15 | TSS200  | 0.71 | (0.5; 1.01)  | 5.9E-02 |
| cg07289040 | <i>CTNND2</i>  | chr5  | Body    | 0.65 | (0.41; 1.02) | 6.0E-02 |
| cg15268622 | <i>POU2F1</i>  | chr1  | TSS1500 | 1.42 | (0.99; 2.05) | 6.0E-02 |
| cg14250783 | <i>PTPRN2</i>  | chr7  | Body    | 0.72 | (0.51; 1.01) | 6.0E-02 |
| cg05829224 | <i>AKAP3</i>   | chr12 | 3'UTR   | 1.37 | (0.99; 1.91) | 6.0E-02 |
| cg07974531 | <i>RTN4RL1</i> | chr17 | 1stExon | 1.37 | (0.99; 1.91) | 6.0E-02 |
| cg07974531 | <i>RTN4RL1</i> | chr17 | 5'UTR   | 1.37 | (0.99; 1.91) | 6.0E-02 |
| cg16508202 | <i>CNTNAP2</i> | chr7  | Body    | 0.72 | (0.51; 1.01) | 6.0E-02 |
| cg01385312 | <i>TNRC18</i>  | chr7  | Body    | 0.73 | (0.53; 1.01) | 6.0E-02 |
| cg04001311 | <i>CACNA1C</i> | chr12 | Body    | 1.38 | (0.99; 1.94) | 6.0E-02 |
| cg09975316 | <i>AKAP13</i>  | chr15 | TSS200  | 0.76 | (0.57; 1.01) | 6.0E-02 |
| cg14659930 | <i>ZBTB20</i>  | chr3  | 5'UTR   | 0.66 | (0.43; 1.02) | 6.0E-02 |
| cg12227051 | <i>TNRC6B</i>  | chr22 | Body    | 0.74 | (0.54; 1.01) | 6.1E-02 |
| cg15851964 | <i>CTDSP2</i>  | chr12 | Body    | 1.36 | (0.99; 1.88) | 6.1E-02 |
| cg05901503 | <i>TENM2</i>   | chr5  | Body    | 0.7  | (0.48; 1.02) | 6.1E-02 |
| cg14387516 | <i>WWOX</i>    | chr16 | Body    | 1.46 | (0.98; 2.18) | 6.1E-02 |
| cg11568410 | <i>DMXL2</i>   | chr15 | Body    | 0.69 | (0.48; 1.02) | 6.1E-02 |
| cg03738400 | <i>PDE8A</i>   | chr15 | 5'UTR   | 0.68 | (0.46; 1.02) | 6.1E-02 |
| cg03738400 | <i>PDE8A</i>   | chr15 | Body    | 0.68 | (0.46; 1.02) | 6.1E-02 |
| cg09025274 | <i>ALCAM</i>   | chr3  | Body    | 1.43 | (0.98; 2.08) | 6.1E-02 |
| cg03541126 | <i>PTPRN2</i>  | chr7  | Body    | 1.4  | (0.98; 2)    | 6.1E-02 |
| cg10208640 | <i>PHACTR1</i> | chr6  | Body    | 1.4  | (0.98; 1.98) | 6.1E-02 |



|            |              |       |         |      |              |         |
|------------|--------------|-------|---------|------|--------------|---------|
| cg03295251 | WVOX         | chr16 | Body    | 0.72 | (0.51; 1.02) | 6.1E-02 |
| cg26075417 | PTPRN2       | chr7  | Body    | 0.71 | (0.5; 1.02)  | 6.1E-02 |
| cg13030786 | TNRC18       | chr7  | Body    | 1.36 | (0.99; 1.88) | 6.1E-02 |
| cg07054040 | MEIS2        | chr15 | 5'UTR   | 1.47 | (0.98; 2.19) | 6.1E-02 |
| cg07054040 | MEIS2        | chr15 | 1stExon | 1.47 | (0.98; 2.19) | 6.1E-02 |
| cg07054040 | MEIS2        | chr15 | TSS1500 | 1.47 | (0.98; 2.19) | 6.1E-02 |
| cg18045670 | ATP6V0C      | chr16 | 3'UTR   | 1.34 | (0.99; 1.83) | 6.1E-02 |
| cg01681049 | SCAF8        | chr6  | Body    | 0.7  | (0.48; 1.02) | 6.1E-02 |
| cg21484749 | BRUNOL4      | chr18 | TSS200  | 0.63 | (0.39; 1.02) | 6.1E-02 |
| cg23549922 | WVOX         | chr16 | Body    | 1.53 | (0.98; 2.39) | 6.1E-02 |
| cg06742794 | ATF7IP       | chr12 | 5'UTR   | 0.74 | (0.54; 1.01) | 6.1E-02 |
| cg06742794 | ATF7IP       | chr12 | Body    | 0.74 | (0.54; 1.01) | 6.1E-02 |
| cg11593799 | PTPRN2       | chr7  | Body    | 0.7  | (0.48; 1.02) | 6.1E-02 |
| cg01014179 | FBXO36       | chr2  | TSS200  | 1.4  | (0.98; 1.98) | 6.2E-02 |
| cg21991803 | CACNA1C      | chr12 | Body    | 0.71 | (0.49; 1.02) | 6.2E-02 |
| cg02580308 | COL5A2       | chr2  | Body    | 1.46 | (0.98; 2.16) | 6.2E-02 |
| cg04654570 | CTDSPL2      | chr15 | Body    | 1.44 | (0.98; 2.12) | 6.2E-02 |
| cg12600858 | MTNR1B       | chr11 | TSS1500 | 1.37 | (0.98; 1.9)  | 6.2E-02 |
| cg11074968 | CPEB1        | chr15 | Body    | 1.44 | (0.98; 2.12) | 6.2E-02 |
| cg11074968 | CPEB1        | chr15 | TSS1500 | 1.44 | (0.98; 2.12) | 6.2E-02 |
| cg23704413 | PTPRN2       | chr7  | Body    | 1.36 | (0.98; 1.89) | 6.2E-02 |
| cg04078118 | TNRC6B       | chr22 | TSS1500 | 0.7  | (0.48; 1.02) | 6.2E-02 |
| cg21906038 | UNC80        | chr2  | TSS1500 | 0.63 | (0.38; 1.02) | 6.3E-02 |
| cg12323274 | BRUNOL4      | chr18 | Body    | 0.71 | (0.49; 1.02) | 6.3E-02 |
| cg13219509 | TNRC6B       | chr22 | TSS1500 | 0.74 | (0.54; 1.02) | 6.3E-02 |
| cg10940698 | FBXO34       | chr14 | 5'UTR   | 0.73 | (0.53; 1.02) | 6.3E-02 |
| cg06828538 | TNRC18       | chr7  | TSS1500 | 1.5  | (0.98; 2.29) | 6.3E-02 |
| cg21418679 | FBXO36       | chr2  | TSS1500 | 0.71 | (0.5; 1.02)  | 6.3E-02 |
| cg10378898 | FBXO34       | chr14 | TSS1500 | 0.74 | (0.54; 1.02) | 6.3E-02 |
| cg10378898 | FBXO34       | chr14 | 1stExon | 0.74 | (0.54; 1.02) | 6.3E-02 |
| cg10378898 | FBXO34       | chr14 | 5'UTR   | 0.74 | (0.54; 1.02) | 6.3E-02 |
| cg04656576 | TENM2        | chr5  | Body    | 0.7  | (0.48; 1.02) | 6.3E-02 |
| cg17209276 | CTNND2       | chr5  | Body    | 0.76 | (0.56; 1.02) | 6.3E-02 |
| cg00617866 | CTNND2       | chr5  | Body    | 0.68 | (0.45; 1.02) | 6.3E-02 |
| cg09825093 | CDH13        | chr16 | TSS200  | 1.51 | (0.98; 2.34) | 6.3E-02 |
| cg05817517 | CSMD2        | chr1  | Body    | 1.39 | (0.98; 1.96) | 6.3E-02 |
| cg27328297 | ARID1A       | chr1  | Body    | 1.35 | (0.98; 1.87) | 6.3E-02 |
| cg11173615 | PHACTR1      | chr6  | Body    | 0.72 | (0.52; 1.02) | 6.4E-02 |
| cg26724551 | PTPRS        | chr19 | Body    | 1.49 | (0.98; 2.29) | 6.4E-02 |
| cg23375968 | PTPRN2       | chr7  | Body    | 0.72 | (0.51; 1.02) | 6.4E-02 |
| cg23377942 | WVOX         | chr16 | Body    | 1.35 | (0.98; 1.84) | 6.4E-02 |
| cg03196689 | C11orf67     | chr11 | TSS1500 | 1.49 | (0.98; 2.26) | 6.4E-02 |
| cg14749964 | TNFRSF1A     | chr12 | 5'UTR   | 1.43 | (0.98; 2.08) | 6.4E-02 |
| cg14749964 | TNFRSF1A     | chr12 | 1stExon | 1.43 | (0.98; 2.08) | 6.4E-02 |
| cg26120109 | PTPRU        | chr1  | Body    | 1.38 | (0.98; 1.93) | 6.4E-02 |
| cg13917957 | COL5A2       | chr2  | Body    | 0.71 | (0.49; 1.02) | 6.4E-02 |
| cg00612225 | DNAI2        | chr17 | TSS1500 | 0.7  | (0.48; 1.02) | 6.4E-02 |
| cg24852777 | CUX2         | chr12 | Body    | 1.44 | (0.98; 2.13) | 6.4E-02 |
| cg15397817 | LOC101929698 | chr20 | Body    | 0.7  | (0.48; 1.02) | 6.4E-02 |
| cg15397817 | NOL4L        | chr20 | Body    | 0.7  | (0.48; 1.02) | 6.4E-02 |
| cg21204965 | CSMD2        | chr1  | Body    | 0.74 | (0.54; 1.02) | 6.5E-02 |
| cg07575130 | PTPRN2       | chr7  | Body    | 0.74 | (0.54; 1.02) | 6.5E-02 |
| cg24454909 | TENM2        | chr5  | Body    | 0.66 | (0.43; 1.03) | 6.5E-02 |
| cg05072064 | WVOX         | chr16 | Body    | 0.74 | (0.54; 1.02) | 6.5E-02 |
| cg21375294 | BRUNOL4      | chr18 | Body    | 0.65 | (0.41; 1.03) | 6.5E-02 |
| cg07857234 | TAOK3        | chr12 | Body    | 1.41 | (0.98; 2.03) | 6.5E-02 |
| cg23145382 | TNRC6B       | chr22 | 5'UTR   | 0.71 | (0.5; 1.02)  | 6.5E-02 |
| cg14535460 | TENM2        | chr5  | Body    | 1.37 | (0.98; 1.93) | 6.5E-02 |
| cg26224223 | TSHZ3        | chr19 | TSS1500 | 0.7  | (0.48; 1.02) | 6.5E-02 |
| cg19919303 | BARX2        | chr11 | 5'UTR   | 1.48 | (0.98; 2.25) | 6.5E-02 |
| cg19919303 | BARX2        | chr11 | 1stExon | 1.48 | (0.98; 2.25) | 6.5E-02 |



|            |           |       |         |      |              |         |
|------------|-----------|-------|---------|------|--------------|---------|
| cg18327772 | HMGB4     | chr1  | 5'UTR   | 0.72 | (0.5; 1.02)  | 6.5E-02 |
| cg18327772 | HMGB4     | chr1  | TSS1500 | 0.72 | (0.5; 1.02)  | 6.5E-02 |
| cg18327772 | CSMD2     | chr1  | Body    | 0.72 | (0.5; 1.02)  | 6.5E-02 |
| cg26389638 | PTPRN2    | chr7  | Body    | 0.72 | (0.51; 1.02) | 6.5E-02 |
| cg23405198 | FSTL1     | chr3  | Body    | 0.69 | (0.46; 1.02) | 6.5E-02 |
| cg11653336 | CHFR      | chr12 | TSS1500 | 1.45 | (0.98; 2.17) | 6.5E-02 |
| cg11414276 | CACNA1C   | chr12 | Body    | 0.73 | (0.52; 1.02) | 6.5E-02 |
| cg15419330 | TENM2     | chr5  | Body    | 0.71 | (0.49; 1.02) | 6.6E-02 |
| cg06734435 | PTPRN2    | chr7  | Body    | 0.73 | (0.53; 1.02) | 6.6E-02 |
| cg03156546 | TNRC6A    | chr16 | Body    | 0.64 | (0.4; 1.03)  | 6.6E-02 |
| cg24098302 | CTDSPL2   | chr15 | 1stExon | 1.36 | (0.98; 1.88) | 6.6E-02 |
| cg24098302 | CTDSPL2   | chr15 | 5'UTR   | 1.36 | (0.98; 1.88) | 6.6E-02 |
| cg11672159 | C11orf67  | chr11 | TSS1500 | 0.69 | (0.47; 1.02) | 6.6E-02 |
| cg11622516 | FSTL1     | chr3  | Body    | 0.73 | (0.53; 1.02) | 6.6E-02 |
| cg21526469 | ATF7IP2   | chr16 | 5'UTR   | 1.53 | (0.97; 2.4)  | 6.6E-02 |
| cg21526469 | ATF7IP2   | chr16 | Body    | 1.53 | (0.97; 2.4)  | 6.6E-02 |
| cg23204897 | PHACTR1   | chr6  | Body    | 0.7  | (0.48; 1.02) | 6.6E-02 |
| cg14970975 | TNFRSF1A  | chr12 | Body    | 0.67 | (0.43; 1.03) | 6.6E-02 |
| cg19418190 | PTPRN2    | chr7  | Body    | 0.74 | (0.54; 1.02) | 6.6E-02 |
| cg11178017 | TNRC6B    | chr22 | TSS200  | 0.77 | (0.58; 1.02) | 6.6E-02 |
| cg07768777 | TNRC6A    | chr16 | Body    | 0.73 | (0.52; 1.02) | 6.6E-02 |
| cg22222104 | UNC80     | chr2  | Body    | 0.62 | (0.38; 1.03) | 6.6E-02 |
| cg24357619 | MEIS2     | chr15 | Body    | 1.45 | (0.97; 2.17) | 6.6E-02 |
| cg24019478 | TNRC6B    | chr22 | Body    | 1.45 | (0.98; 2.14) | 6.6E-02 |
| cg18327617 | TNFRSF11A | chr18 | Body    | 0.72 | (0.51; 1.02) | 6.7E-02 |
| cg24123860 | TENM2     | chr5  | Body    | 1.44 | (0.98; 2.12) | 6.7E-02 |
| cg05224804 | PTPRN2    | chr7  | Body    | 1.38 | (0.98; 1.94) | 6.7E-02 |
| cg27483791 | PTPRN2    | chr7  | Body    | 0.72 | (0.51; 1.02) | 6.7E-02 |
| cg23524436 | CACNA1C   | chr12 | TSS1500 | 0.68 | (0.45; 1.03) | 6.7E-02 |
| cg18558969 | BRUNOL4   | chr18 | Body    | 1.33 | (0.98; 1.81) | 6.7E-02 |
| cg04414675 | PTPRN2    | chr7  | Body    | 1.34 | (0.98; 1.83) | 6.7E-02 |
| cg16405582 | ZNF704    | chr8  | 5'UTR   | 1.36 | (0.98; 1.9)  | 6.7E-02 |
| cg05949171 | CDH13     | chr16 | 1stExon | 0.69 | (0.46; 1.03) | 6.8E-02 |
| cg05949171 | CDH13     | chr16 | 5'UTR   | 0.69 | (0.46; 1.03) | 6.8E-02 |
| cg09919124 | FBXO11    | chr2  | Body    | 0.71 | (0.49; 1.03) | 6.8E-02 |
| cg08151051 | PTPRN2    | chr7  | Body    | 0.75 | (0.55; 1.02) | 6.8E-02 |
| cg26233218 | PTPRN2    | chr7  | Body    | 0.76 | (0.57; 1.02) | 6.8E-02 |
| cg27550325 | PTPRN2    | chr7  | Body    | 0.73 | (0.52; 1.02) | 6.8E-02 |
| cg08325842 | ZFP91     | chr11 | Body    | 0.71 | (0.49; 1.03) | 6.8E-02 |
| cg01498219 | GNA12     | chr7  | Body    | 0.74 | (0.54; 1.02) | 6.8E-02 |
| cg23266266 | DCUN1D4   | chr4  | TSS1500 | 0.75 | (0.54; 1.02) | 6.8E-02 |
| cg07530460 | TNRC6C    | chr17 | Body    | 1.37 | (0.98; 1.92) | 6.8E-02 |
| cg13999061 | ATF7IP2   | chr16 | TSS1500 | 0.73 | (0.53; 1.02) | 6.8E-02 |
| cg10491652 | MEX3A     | chr1  | TSS1500 | 0.76 | (0.56; 1.02) | 6.8E-02 |
| cg00958342 | MEIS2     | chr15 | Body    | 0.69 | (0.46; 1.03) | 6.8E-02 |
| cg14403705 | PTPRS     | chr19 | 5'UTR   | 0.75 | (0.55; 1.02) | 6.9E-02 |
| cg13854296 | BARX1     | chr9  | Body    | 0.7  | (0.48; 1.03) | 6.9E-02 |
| cg17005864 | TENM2     | chr5  | Body    | 0.73 | (0.52; 1.02) | 6.9E-02 |
| cg18522715 | PTPRN2    | chr7  | Body    | 0.7  | (0.47; 1.03) | 6.9E-02 |
| cg19378798 | PTPRS     | chr19 | 5'UTR   | 1.37 | (0.98; 1.91) | 6.9E-02 |
| cg18627042 | ZBTB20    | chr3  | Body    | 0.72 | (0.5; 1.03)  | 6.9E-02 |
| cg18627042 | ZBTB20    | chr3  | 3'UTR   | 0.72 | (0.5; 1.03)  | 6.9E-02 |
| cg22227034 | TNFRSF1B  | chr1  | Body    | 1.46 | (0.97; 2.21) | 6.9E-02 |
| cg26411814 | CNTF      | chr11 | 1stExon | 1.4  | (0.97; 2)    | 7.0E-02 |
| cg10652780 | RTN4R     | chr22 | Body    | 1.43 | (0.97; 2.11) | 7.0E-02 |
| cg16960396 | PTPRN2    | chr7  | Body    | 0.71 | (0.49; 1.03) | 7.0E-02 |
| cg22202944 | NRXN1     | chr2  | Body    | 0.72 | (0.5; 1.03)  | 7.0E-02 |
| cg21813473 | CHD6      | chr20 | TSS200  | 1.57 | (0.96; 2.56) | 7.0E-02 |
| cg22095604 | NOL4      | chr18 | 5'UTR   | 0.6  | (0.34; 1.04) | 7.0E-02 |
| cg22095604 | NOL4      | chr18 | 1stExon | 0.6  | (0.34; 1.04) | 7.0E-02 |
| cg02136961 | CACNA1C   | chr12 | Body    | 0.67 | (0.43; 1.03) | 7.0E-02 |



|            |                 |       |         |      |              |         |
|------------|-----------------|-------|---------|------|--------------|---------|
| cg03228931 | <i>CTDSP2</i>   | chr12 | Body    | 0.71 | (0.49; 1.03) | 7.0E-02 |
| cg17102042 | <i>PTPRN2</i>   | chr7  | Body    | 1.3  | (0.98; 1.71) | 7.0E-02 |
| cg06352807 | <i>PTPRN2</i>   | chr7  | Body    | 1.66 | (0.96; 2.87) | 7.0E-02 |
| cg04508233 | <i>TNRC6A</i>   | chr16 | TSS200  | 1.37 | (0.97; 1.92) | 7.0E-02 |
| cg26695909 | <i>ZNF704</i>   | chr8  | Body    | 1.45 | (0.97; 2.16) | 7.1E-02 |
| cg22760256 | <i>SUGCT</i>    | chr7  | Body    | 0.71 | (0.49; 1.03) | 7.1E-02 |
| cg13617074 | <i>MEIS2</i>    | chr15 | Body    | 1.47 | (0.97; 2.24) | 7.1E-02 |
| cg21904701 | <i>UBE2E2</i>   | chr3  | Body    | 0.63 | (0.39; 1.04) | 7.1E-02 |
| cg20808693 | <i>SMARCD3</i>  | chr7  | Body    | 1.49 | (0.97; 2.3)  | 7.1E-02 |
| cg06805498 | <i>ALCAM</i>    | chr3  | TSS1500 | 1.55 | (0.96; 2.49) | 7.1E-02 |
| cg13353015 | <i>CSMD2</i>    | chr1  | Body    | 1.46 | (0.97; 2.2)  | 7.1E-02 |
| cg09043214 | <i>TNFRSF1A</i> | chr12 | Body    | 0.73 | (0.52; 1.03) | 7.1E-02 |
| cg24018963 | <i>CPEB1</i>    | chr15 | Body    | 1.49 | (0.97; 2.31) | 7.1E-02 |
| cg24018963 | <i>CPEB1</i>    | chr15 | 5'UTR   | 1.49 | (0.97; 2.31) | 7.1E-02 |
| cg07879269 | <i>FSTL1</i>    | chr3  | Body    | 0.73 | (0.53; 1.03) | 7.1E-02 |
| cg17402889 | <i>CACNA1C</i>  | chr12 | Body    | 0.7  | (0.48; 1.03) | 7.1E-02 |
| cg05955332 | <i>CHCHD6</i>   | chr3  | Body    | 1.35 | (0.97; 1.87) | 7.1E-02 |
| cg12944311 | <i>PEX14</i>    | chr1  | Body    | 1.37 | (0.97; 1.94) | 7.1E-02 |
| cg04268643 | <i>TNRC6C</i>   | chr17 | 5'UTR   | 1.39 | (0.97; 1.98) | 7.2E-02 |
| cg06933370 | <i>MEIS2</i>    | chr15 | Body    | 0.65 | (0.41; 1.04) | 7.2E-02 |
| cg18214796 | <i>FBXO33</i>   | chr14 | TSS1500 | 1.34 | (0.97; 1.85) | 7.2E-02 |
| cg18862920 | <i>WWOX</i>     | chr16 | Body    | 1.4  | (0.97; 2.02) | 7.2E-02 |
| cg26624576 | <i>CDH11</i>    | chr16 | TSS1500 | 0.73 | (0.52; 1.03) | 7.2E-02 |
| cg08458170 | <i>TSHZ3</i>    | chr19 | Body    | 1.36 | (0.97; 1.91) | 7.2E-02 |
| cg13455291 | <i>ZBTB20</i>   | chr3  | Body    | 1.37 | (0.97; 1.94) | 7.2E-02 |
| cg13455291 | <i>ZBTB20</i>   | chr3  | 5'UTR   | 1.37 | (0.97; 1.94) | 7.2E-02 |
| cg01611626 | <i>ATP6V0C</i>  | chr16 | Body    | 0.57 | (0.31; 1.05) | 7.2E-02 |
| cg03129172 | <i>TNFRSF1B</i> | chr1  | Body    | 1.46 | (0.97; 2.2)  | 7.3E-02 |
| cg05123139 | <i>AKAP13</i>   | chr15 | TSS1500 | 0.66 | (0.42; 1.04) | 7.3E-02 |
| cg04828658 | <i>NRXN1</i>    | chr2  | Body    | 1.38 | (0.97; 1.97) | 7.3E-02 |
| cg07022959 | <i>WWOX</i>     | chr16 | Body    | 0.7  | (0.47; 1.03) | 7.3E-02 |
| cg10866847 | <i>CTDSPL</i>   | chr3  | Body    | 0.73 | (0.51; 1.03) | 7.3E-02 |
| cg03753995 | <i>CEP350</i>   | chr1  | Body    | 1.34 | (0.97; 1.84) | 7.3E-02 |
| cg03576422 | <i>WAC</i>      | chr10 | Body    | 0.74 | (0.54; 1.03) | 7.3E-02 |
| cg03480698 | <i>PTPRN2</i>   | chr7  | Body    | 1.41 | (0.97; 2.04) | 7.3E-02 |
| cg19803298 | <i>PHACTR1</i>  | chr6  | Body    | 0.75 | (0.54; 1.03) | 7.3E-02 |
| cg05328339 | <i>PTPRN2</i>   | chr7  | Body    | 1.39 | (0.97; 2)    | 7.4E-02 |
| cg06483517 | <i>WWOX</i>     | chr16 | Body    | 1.36 | (0.97; 1.9)  | 7.4E-02 |
| cg19789919 | <i>ATF7IP</i>   | chr12 | TSS200  | 0.73 | (0.52; 1.03) | 7.4E-02 |
| cg04894644 | <i>CACNA1C</i>  | chr12 | Body    | 0.65 | (0.41; 1.04) | 7.4E-02 |
| cg10502136 | <i>PHACTR1</i>  | chr6  | Body    | 0.71 | (0.48; 1.03) | 7.4E-02 |
| cg16593910 | <i>CSMD2</i>    | chr1  | Body    | 0.74 | (0.53; 1.03) | 7.4E-02 |
| cg15105081 | <i>C11orf67</i> | chr11 | 5'UTR   | 0.74 | (0.52; 1.03) | 7.5E-02 |
| cg15105081 | <i>C11orf67</i> | chr11 | 1stExon | 0.74 | (0.52; 1.03) | 7.5E-02 |
| cg07208691 | <i>CUX2</i>     | chr12 | Body    | 0.66 | (0.42; 1.04) | 7.5E-02 |
| cg15091879 | <i>ZBTB20</i>   | chr3  | TSS200  | 0.75 | (0.55; 1.03) | 7.5E-02 |
| cg16370537 | <i>PTPRN2</i>   | chr7  | Body    | 0.73 | (0.51; 1.03) | 7.5E-02 |
| cg04170451 | <i>WAC</i>      | chr10 | TSS1500 | 1.35 | (0.97; 1.89) | 7.5E-02 |
| cg04170451 | <i>WAC</i>      | chr10 | 5'UTR   | 1.35 | (0.97; 1.89) | 7.5E-02 |
| cg03325403 | <i>CSMD2</i>    | chr1  | Body    | 1.42 | (0.96; 2.1)  | 7.5E-02 |
| cg02351971 | <i>FSTL1</i>    | chr3  | Body    | 1.42 | (0.97; 2.09) | 7.5E-02 |
| cg02351971 | <i>FSTL1</i>    | chr3  | ExonBnd | 1.42 | (0.97; 2.09) | 7.5E-02 |
| cg03899558 | <i>DCUN1D4</i>  | chr4  | Body    | 0.73 | (0.51; 1.03) | 7.5E-02 |
| cg21643314 | <i>MEIS2</i>    | chr15 | TSS200  | 0.74 | (0.53; 1.03) | 7.5E-02 |
| cg21643314 | <i>MEIS2</i>    | chr15 | Body    | 0.74 | (0.53; 1.03) | 7.5E-02 |
| cg21643314 | <i>MEIS2</i>    | chr15 | 5'UTR   | 0.74 | (0.53; 1.03) | 7.5E-02 |
| cg10595396 | <i>CDH13</i>    | chr16 | Body    | 0.73 | (0.52; 1.03) | 7.5E-02 |
| cg04576058 | <i>ERI3</i>     | chr1  | Body    | 0.75 | (0.54; 1.03) | 7.6E-02 |
| cg04576058 | <i>ERI3</i>     | chr1  | 5'UTR   | 0.75 | (0.54; 1.03) | 7.6E-02 |
| cg22903773 | <i>CHD6</i>     | chr20 | TSS1500 | 1.48 | (0.96; 2.27) | 7.6E-02 |
| cg04393532 | <i>DNAI2</i>    | chr17 | Body    | 0.76 | (0.56; 1.03) | 7.6E-02 |



|            |                     |       |         |      |              |         |
|------------|---------------------|-------|---------|------|--------------|---------|
| cg05902801 | <i>CUX2</i>         | chr12 | Body    | 0.75 | (0.54; 1.03) | 7.6E-02 |
| cg24995915 | <i>ATP8A1</i>       | chr4  | TSS1500 | 1.34 | (0.97; 1.84) | 7.6E-02 |
| cg04328166 | <i>CACNA1C</i>      | chr12 | Body    | 1.45 | (0.96; 2.19) | 7.6E-02 |
| cg24444035 | <i>TENM2</i>        | chr5  | Body    | 0.75 | (0.55; 1.03) | 7.6E-02 |
| cg24444035 | <i>CTB-178M22.2</i> | chr5  | TSS1500 | 0.75 | (0.55; 1.03) | 7.6E-02 |
| cg13031545 | <i>PHACTR1</i>      | chr6  | Body    | 0.76 | (0.56; 1.03) | 7.6E-02 |
| cg12771255 | <i>MTCL1</i>        | chr18 | Body    | 0.73 | (0.52; 1.03) | 7.6E-02 |
| cg00369194 | <i>PTPRN2</i>       | chr7  | Body    | 1.32 | (0.97; 1.8)  | 7.6E-02 |
| cg10736303 | <i>PTPRN2</i>       | chr7  | Body    | 0.75 | (0.54; 1.03) | 7.7E-02 |
| cg06470298 | <i>CHCHD6</i>       | chr3  | Body    | 0.72 | (0.5; 1.04)  | 7.7E-02 |
| cg20521805 | <i>ZBTB20</i>       | chr3  | Body    | 1.41 | (0.96; 2.07) | 7.7E-02 |
| cg20521805 | <i>ZBTB20</i>       | chr3  | 5'UTR   | 1.41 | (0.96; 2.07) | 7.7E-02 |
| cg14711108 | <i>ERI3</i>         | chr1  | Body    | 0.72 | (0.5; 1.04)  | 7.7E-02 |
| cg25519930 | <i>CACNA1C</i>      | chr12 | TSS1500 | 0.69 | (0.46; 1.04) | 7.7E-02 |
| cg01630032 | <i>WVOX</i>         | chr16 | Body    | 0.76 | (0.56; 1.03) | 7.7E-02 |
| cg10231400 | <i>AKAP13</i>       | chr15 | Body    | 0.68 | (0.44; 1.04) | 7.7E-02 |
| cg14627974 | <i>CNTNAP2</i>      | chr7  | Body    | 0.7  | (0.47; 1.04) | 7.7E-02 |
| cg00507497 | <i>BRUNOL4</i>      | chr18 | Body    | 0.75 | (0.54; 1.03) | 7.7E-02 |
| cg03879823 | <i>PHACTR1</i>      | chr6  | Body    | 0.7  | (0.48; 1.04) | 7.7E-02 |
| cg06310022 | <i>ZBTB20</i>       | chr3  | 5'UTR   | 0.48 | (0.21; 1.08) | 7.7E-02 |
| cg06310022 | <i>ZBTB20</i>       | chr3  | Body    | 0.48 | (0.21; 1.08) | 7.7E-02 |
| cg11387591 | <i>PTPRU</i>        | chr1  | Body    | 0.7  | (0.47; 1.04) | 7.7E-02 |
| cg17261469 | <i>FBXO31</i>       | chr16 | 5'UTR   | 1.35 | (0.97; 1.89) | 7.8E-02 |
| cg16280215 | <i>PTPRN2</i>       | chr7  | Body    | 0.74 | (0.53; 1.03) | 7.8E-02 |
| cg06402602 | <i>FBXO31</i>       | chr16 | Body    | 1.39 | (0.96; 2)    | 7.8E-02 |
| cg06402602 | <i>FBXO31</i>       | chr16 | 1stExon | 1.39 | (0.96; 2)    | 7.8E-02 |
| cg00977640 | <i>ERI3</i>         | chr1  | Body    | 1.35 | (0.97; 1.88) | 7.8E-02 |
| cg00977640 | <i>ERI3</i>         | chr1  | 5'UTR   | 1.35 | (0.97; 1.88) | 7.8E-02 |
| cg26900406 | <i>CHCHD6</i>       | chr3  | Body    | 1.66 | (0.94; 2.92) | 7.8E-02 |
| cg22566312 | <i>SUGCT</i>        | chr7  | Body    | 1.58 | (0.95; 2.64) | 7.8E-02 |
| cg06158347 | <i>CDH11</i>        | chr16 | 5'UTR   | 0.62 | (0.37; 1.05) | 7.8E-02 |
| cg06158347 | <i>CDH11</i>        | chr16 | 1stExon | 0.62 | (0.37; 1.05) | 7.8E-02 |
| cg15578140 | <i>CNTNAP2</i>      | chr7  | Body    | 1.4  | (0.96; 2.04) | 7.8E-02 |
| cg03526582 | <i>NDUFA9</i>       | chr12 | ExonBnd | 0.69 | (0.45; 1.04) | 7.8E-02 |
| cg03526582 | <i>NDUFA9</i>       | chr12 | Body    | 0.69 | (0.45; 1.04) | 7.8E-02 |
| cg14475362 | <i>TNR</i>          | chr1  | 5'UTR   | 0.76 | (0.56; 1.03) | 7.8E-02 |
| cg01633442 | <i>PTPRN2</i>       | chr7  | Body    | 1.36 | (0.97; 1.93) | 7.8E-02 |
| cg09025856 | <i>CTNND2</i>       | chr5  | Body    | 1.39 | (0.96; 2)    | 7.8E-02 |
| cg04415672 | <i>CTDSP2</i>       | chr12 | Body    | 0.7  | (0.47; 1.04) | 7.9E-02 |
| cg23239817 | <i>PTPRS</i>        | chr19 | 5'UTR   | 0.74 | (0.52; 1.04) | 7.9E-02 |
| cg17349753 | <i>RTN4RL2</i>      | chr11 | TSS1500 | 1.34 | (0.97; 1.87) | 7.9E-02 |
| cg03637781 | <i>CTDSPL</i>       | chr3  | TSS1500 | 0.71 | (0.49; 1.04) | 7.9E-02 |
| cg23523780 | <i>TNFRSF10C</i>    | chr8  | Body    | 0.75 | (0.54; 1.03) | 7.9E-02 |
| cg26173773 | <i>PTPRN2</i>       | chr7  | Body    | 1.47 | (0.96; 2.24) | 7.9E-02 |
| cg21818126 | <i>SUSD4</i>        | chr1  | Body    | 2.02 | (0.92; 4.43) | 7.9E-02 |
| cg26413827 | <i>DACH1</i>        | chr13 | 5'UTR   | 0.69 | (0.46; 1.04) | 7.9E-02 |
| cg26413827 | <i>DACH1</i>        | chr13 | 1stExon | 0.69 | (0.46; 1.04) | 7.9E-02 |
| cg26297866 | <i>MEX3A</i>        | chr1  | TSS1500 | 1.4  | (0.96; 2.05) | 7.9E-02 |
| cg13669769 | <i>CHFR</i>         | chr12 | Body    | 1.34 | (0.97; 1.86) | 8.0E-02 |
| cg09354263 | <i>RECQL5</i>       | chr17 | Body    | 0.72 | (0.5; 1.04)  | 8.0E-02 |
| cg16977570 | <i>TNFRSF19</i>     | chr13 | 5'UTR   | 0.74 | (0.52; 1.04) | 8.0E-02 |
| cg16977570 | <i>TNFRSF19</i>     | chr13 | TSS1500 | 0.74 | (0.52; 1.04) | 8.0E-02 |
| cg09798033 | <i>CUX2</i>         | chr12 | Body    | 0.67 | (0.42; 1.05) | 8.0E-02 |
| cg12058544 | <i>PTPRU</i>        | chr1  | Body    | 1.39 | (0.96; 2)    | 8.0E-02 |
| cg00860742 | <i>PTPRN2</i>       | chr7  | Body    | 0.75 | (0.54; 1.04) | 8.0E-02 |
| cg22228488 | <i>RECQL</i>        | chr12 | 1stExon | 0.67 | (0.42; 1.05) | 8.0E-02 |
| cg22228488 | <i>GOLT1B</i>       | chr12 | TSS200  | 0.67 | (0.42; 1.05) | 8.0E-02 |
| cg22228488 | <i>RECQL</i>        | chr12 | 5'UTR   | 0.67 | (0.42; 1.05) | 8.0E-02 |
| cg17291423 | <i>PTPRN2</i>       | chr7  | Body    | 0.7  | (0.47; 1.04) | 8.0E-02 |
| cg11443327 | <i>TNRC6B</i>       | chr22 | Body    | 0.75 | (0.54; 1.04) | 8.0E-02 |
| cg00108938 | <i>PTPRN2</i>       | chr7  | Body    | 0.72 | (0.51; 1.04) | 8.0E-02 |



|            |           |       |         |      |              |         |
|------------|-----------|-------|---------|------|--------------|---------|
| cg17131176 | WWOX      | chr16 | Body    | 1.89 | (0.93; 3.86) | 8.0E-02 |
| cg11871991 | CPEB1     | chr15 | 1stExon | 1.49 | (0.95; 2.33) | 8.0E-02 |
| cg11871991 | CPEB1     | chr15 | Body    | 1.49 | (0.95; 2.33) | 8.0E-02 |
| cg16560455 | ZBTB20    | chr3  | Body    | 0.67 | (0.42; 1.05) | 8.0E-02 |
| cg16560455 | ZBTB20    | chr3  | 5'UTR   | 0.67 | (0.42; 1.05) | 8.0E-02 |
| cg09162514 | SUGCT     | chr7  | Body    | 1.98 | (0.92; 4.27) | 8.0E-02 |
| cg19813207 | DNAI2     | chr17 | Body    | 1.33 | (0.97; 1.84) | 8.0E-02 |
| cg16763576 | MBD5      | chr2  | 5'UTR   | 1.31 | (0.97; 1.78) | 8.0E-02 |
| cg09722236 | CTNND2    | chr5  | Body    | 0.71 | (0.48; 1.04) | 8.1E-02 |
| cg08519233 | ALCAM     | chr3  | TSS200  | 0.77 | (0.57; 1.03) | 8.1E-02 |
| cg15555961 | CACNA1C   | chr12 | Body    | 0.67 | (0.42; 1.05) | 8.1E-02 |
| cg26225767 | CUX2      | chr12 | Body    | 1.46 | (0.95; 2.24) | 8.1E-02 |
| cg22695318 | ZBTB20    | chr3  | Body    | 2.11 | (0.91; 4.9)  | 8.1E-02 |
| cg22695318 | ZBTB20    | chr3  | 5'UTR   | 2.11 | (0.91; 4.9)  | 8.1E-02 |
| cg14702865 | CTDSPL    | chr3  | Body    | 1.36 | (0.96; 1.93) | 8.1E-02 |
| cg08161922 | CACNA1C   | chr12 | Body    | 1.36 | (0.96; 1.92) | 8.1E-02 |
| cg23063047 | FBXO32    | chr8  | 5'UTR   | 0.74 | (0.53; 1.04) | 8.1E-02 |
| cg23063047 | FBXO32    | chr8  | Body    | 0.74 | (0.53; 1.04) | 8.1E-02 |
| cg09452483 | PTPRN2    | chr7  | Body    | 1.35 | (0.96; 1.9)  | 8.1E-02 |
| cg13254809 | FBXO33    | chr14 | 3'UTR   | 0.74 | (0.52; 1.04) | 8.1E-02 |
| cg09910067 | PTPRN2    | chr7  | Body    | 1.35 | (0.96; 1.88) | 8.1E-02 |
| cg02925076 | PTPRN2    | chr7  | Body    | 0.73 | (0.51; 1.04) | 8.1E-02 |
| cg19689077 | TNFRSF11A | chr18 | Body    | 0.69 | (0.45; 1.05) | 8.1E-02 |
| cg09650018 | CACNA1C   | chr12 | Body    | 1.36 | (0.96; 1.91) | 8.1E-02 |
| cg10211530 | TNRC18    | chr7  | Body    | 1.73 | (0.93; 3.22) | 8.1E-02 |
| cg19685491 | CACNA1C   | chr12 | Body    | 0.74 | (0.53; 1.04) | 8.1E-02 |
| cg14354631 | PTPRN2    | chr7  | Body    | 0.69 | (0.46; 1.05) | 8.2E-02 |
| cg26069067 | CPEB1     | chr15 | Body    | 0.76 | (0.55; 1.04) | 8.2E-02 |
| cg26069067 | CPEB1     | chr15 | 5'UTR   | 0.76 | (0.55; 1.04) | 8.2E-02 |
| cg20957095 | ZFP91     | chr11 | TSS1500 | 0.7  | (0.47; 1.05) | 8.2E-02 |
| cg03601011 | ACVR2A    | chr2  | 3'UTR   | 0.73 | (0.51; 1.04) | 8.2E-02 |
| cg14430408 | PTPRN2    | chr7  | Body    | 1.4  | (0.96; 2.03) | 8.2E-02 |
| cg04564000 | ZBTB20    | chr3  | 5'UTR   | 0.71 | (0.48; 1.04) | 8.2E-02 |
| cg04564000 | ZBTB20    | chr3  | TSS200  | 0.71 | (0.48; 1.04) | 8.2E-02 |
| cg00472027 | TNRC6C    | chr17 | 5'UTR   | 1.33 | (0.96; 1.83) | 8.2E-02 |
| cg26182922 | PTPRN2    | chr7  | Body    | 0.74 | (0.53; 1.04) | 8.2E-02 |
| cg03531247 | NRXN1     | chr2  | Body    | 0.66 | (0.42; 1.05) | 8.2E-02 |
| cg04937416 | PTPRN2    | chr7  | Body    | 0.76 | (0.56; 1.04) | 8.2E-02 |
| cg09103617 | CACNA1C   | chr12 | Body    | 0.56 | (0.29; 1.08) | 8.2E-02 |
| cg05912020 | CHD6      | chr20 | Body    | 1.38 | (0.96; 2)    | 8.2E-02 |
| cg13517305 | CHCHD6    | chr3  | Body    | 0.74 | (0.53; 1.04) | 8.3E-02 |
| cg01874337 | GNA12     | chr7  | Body    | 0.72 | (0.5; 1.04)  | 8.3E-02 |
| cg17685731 | POU2F1    | chr1  | Body    | 1.85 | (0.92; 3.72) | 8.3E-02 |
| cg17685731 | POU2F1    | chr1  | TSS200  | 1.85 | (0.92; 3.72) | 8.3E-02 |
| cg21120540 | CHCHD6    | chr3  | Body    | 1.44 | (0.95; 2.17) | 8.3E-02 |
| cg15100599 | SUSD4     | chr1  | TSS1500 | 0.69 | (0.45; 1.05) | 8.3E-02 |
| cg13263323 | AKAP13    | chr15 | Body    | 0.76 | (0.55; 1.04) | 8.3E-02 |
| cg19399302 | PTPRN2    | chr7  | Body    | 0.76 | (0.55; 1.04) | 8.4E-02 |
| cg01291336 | SMARCD3   | chr7  | Body    | 1.48 | (0.95; 2.31) | 8.4E-02 |
| cg21040759 | TNFRSF19  | chr13 | 5'UTR   | 1.33 | (0.96; 1.84) | 8.4E-02 |
| cg21040759 | TNFRSF19  | chr13 | TSS200  | 1.33 | (0.96; 1.84) | 8.4E-02 |
| cg11158641 | TNRC6C    | chr17 | 5'UTR   | 0.71 | (0.49; 1.05) | 8.4E-02 |
| cg04276099 | PTPRN2    | chr7  | Body    | 1.37 | (0.96; 1.95) | 8.4E-02 |
| cg11367790 | CACNA1C   | chr12 | 3'UTR   | 1.5  | (0.95; 2.39) | 8.4E-02 |
| cg09556492 | PHACTR1   | chr6  | Body    | 0.74 | (0.52; 1.04) | 8.4E-02 |
| cg04324126 | RTN4      | chr2  | TSS1500 | 1.38 | (0.96; 1.98) | 8.5E-02 |
| cg04324126 | RTN4      | chr2  | 1stExon | 1.38 | (0.96; 1.98) | 8.5E-02 |
| cg04324126 | RTN4      | chr2  | 5'UTR   | 1.38 | (0.96; 1.98) | 8.5E-02 |
| cg05869732 | PTPRN2    | chr7  | Body    | 1.37 | (0.96; 1.95) | 8.5E-02 |
| cg23738173 | CDH13     | chr16 | 5'UTR   | 0.72 | (0.49; 1.05) | 8.5E-02 |
| cg23738173 | CDH13     | chr16 | Body    | 0.72 | (0.49; 1.05) | 8.5E-02 |



|            |                     |       |         |      |              |         |
|------------|---------------------|-------|---------|------|--------------|---------|
| cg00382632 | <i>TNRC6A</i>       | chr16 | Body    | 0.73 | (0.5; 1.05)  | 8.6E-02 |
| cg09434085 | <i>PTPRN2</i>       | chr7  | Body    | 0.75 | (0.54; 1.04) | 8.6E-02 |
| cg09847626 | <i>FBXO34</i>       | chr14 | 5'UTR   | 0.75 | (0.54; 1.04) | 8.6E-02 |
| cg03852267 | <i>TNR</i>          | chr1  | 5'UTR   | 1.38 | (0.96; 2)    | 8.6E-02 |
| cg06016751 | <i>TNFRSF1A</i>     | chr12 | ExonBnd | 0.67 | (0.42; 1.06) | 8.6E-02 |
| cg06016751 | <i>TNFRSF1A</i>     | chr12 | Body    | 0.67 | (0.42; 1.06) | 8.6E-02 |
| cg10430932 | <i>CACNA1C</i>      | chr12 | Body    | 1.57 | (0.94; 2.61) | 8.6E-02 |
| cg01431992 | <i>TAOK3</i>        | chr12 | 5'UTR   | 0.76 | (0.56; 1.04) | 8.6E-02 |
| cg25720067 | <i>SMARCD3</i>      | chr7  | Body    | 1.48 | (0.94; 2.33) | 8.7E-02 |
| cg15160057 | <i>TNFRSF11B</i>    | chr8  | TSS1500 | 1.32 | (0.96; 1.8)  | 8.7E-02 |
| cg00672192 | <i>TNRC6C</i>       | chr17 | Body    | 0.73 | (0.5; 1.05)  | 8.7E-02 |
| cg24254317 | <i>PTPRN2</i>       | chr7  | Body    | 0.73 | (0.51; 1.05) | 8.7E-02 |
| cg09981220 | <i>POU2F1</i>       | chr1  | Body    | 0.34 | (0.1; 1.17)  | 8.7E-02 |
| cg06897306 | <i>PTPRN2</i>       | chr7  | Body    | 1.34 | (0.96; 1.89) | 8.7E-02 |
| cg14659340 | <i>POU2F1</i>       | chr1  | Body    | 0.76 | (0.56; 1.04) | 8.7E-02 |
| cg17310653 | <i>SGIP1</i>        | chr1  | Body    | 1.56 | (0.94; 2.61) | 8.7E-02 |
| cg07083896 | <i>TNFRSF11B</i>    | chr8  | TSS200  | 0.73 | (0.51; 1.05) | 8.7E-02 |
| cg10009056 | <i>MTNR1A</i>       | chr4  | Body    | 1.34 | (0.96; 1.87) | 8.7E-02 |
| cg22202031 | <i>CHFR</i>         | chr12 | TSS1500 | 1.46 | (0.95; 2.27) | 8.7E-02 |
| cg08489892 | <i>ALCAM</i>        | chr3  | Body    | 0.72 | (0.49; 1.05) | 8.7E-02 |
| cg15895820 | <i>CACNA1C</i>      | chr12 | Body    | 1.45 | (0.95; 2.22) | 8.7E-02 |
| cg06747863 | <i>TAOK3</i>        | chr12 | TSS200  | 1.33 | (0.96; 1.83) | 8.7E-02 |
| cg09165170 | <i>PEX14</i>        | chr1  | Body    | 1.29 | (0.96; 1.72) | 8.7E-02 |
| cg17038626 | <i>CACNA1C</i>      | chr12 | Body    | 0.71 | (0.48; 1.05) | 8.7E-02 |
| cg04571059 | <i>FBXO31</i>       | chr16 | Body    | 0.72 | (0.49; 1.05) | 8.7E-02 |
| cg03541742 | <i>CACNA1C</i>      | chr12 | Body    | 0.74 | (0.52; 1.05) | 8.8E-02 |
| cg09350411 | <i>PTPRN2</i>       | chr7  | Body    | 1.31 | (0.96; 1.78) | 8.8E-02 |
| cg08490529 | <i>PTPRN2</i>       | chr7  | Body    | 0.77 | (0.57; 1.04) | 8.8E-02 |
| cg03120102 | <i>WWOX</i>         | chr16 | Body    | 0.74 | (0.53; 1.05) | 8.8E-02 |
| cg15990800 | <i>FBXO34</i>       | chr14 | TSS200  | 1.3  | (0.96; 1.75) | 8.8E-02 |
| cg15990800 | <i>FBXO34</i>       | chr14 | 5'UTR   | 1.3  | (0.96; 1.75) | 8.8E-02 |
| cg06197043 | <i>RTN4R</i>        | chr22 | Body    | 1.33 | (0.96; 1.85) | 8.8E-02 |
| cg17716457 | <i>CSMD2</i>        | chr1  | Body    | 1.43 | (0.95; 2.16) | 8.8E-02 |
| cg11706165 | <i>WWOX</i>         | chr16 | Body    | 1.39 | (0.95; 2.03) | 8.8E-02 |
| cg18601426 | <i>PTPRN2</i>       | chr7  | TSS1500 | 0.71 | (0.49; 1.05) | 8.9E-02 |
| cg06858773 | <i>DACH1</i>        | chr13 | Body    | 0.65 | (0.4; 1.07)  | 8.9E-02 |
| cg26022159 | <i>UBE2E2</i>       | chr3  | Body    | 1.39 | (0.95; 2.03) | 8.9E-02 |
| cg01146238 | <i>RTN4</i>         | chr2  | Body    | 0.74 | (0.53; 1.05) | 8.9E-02 |
| cg13855408 | <i>AKAP13</i>       | chr15 | TSS1500 | 0.78 | (0.58; 1.04) | 8.9E-02 |
| cg13796158 | <i>TNRC18</i>       | chr7  | Body    | 0.77 | (0.56; 1.04) | 8.9E-02 |
| cg25104186 | <i>CSMD2</i>        | chr1  | Body    | 0.76 | (0.55; 1.04) | 8.9E-02 |
| cg20302111 | <i>CHCHD6</i>       | chr3  | TSS1500 | 1.35 | (0.96; 1.91) | 8.9E-02 |
| cg09897881 | <i>AKAP13</i>       | chr15 | Body    | 0.71 | (0.47; 1.05) | 8.9E-02 |
| cg00614413 | <i>PTPRS</i>        | chr19 | 5'UTR   | 1.62 | (0.93; 2.82) | 8.9E-02 |
| cg08576172 | <i>AKAP13</i>       | chr15 | Body    | 0.74 | (0.53; 1.05) | 8.9E-02 |
| cg08576172 | <i>AKAP13</i>       | chr15 | TSS1500 | 0.74 | (0.53; 1.05) | 8.9E-02 |
| cg09636406 | <i>RECQL5</i>       | chr17 | 1stExon | 1.36 | (0.95; 1.93) | 8.9E-02 |
| cg09636406 | <i>RECQL5</i>       | chr17 | 5'UTR   | 1.36 | (0.95; 1.93) | 8.9E-02 |
| cg02117294 | <i>CHD6</i>         | chr20 | 5'UTR   | 0.75 | (0.53; 1.05) | 9.0E-02 |
| cg06542282 | <i>PEX14</i>        | chr1  | Body    | 1.28 | (0.96; 1.7)  | 9.0E-02 |
| cg11717597 | <i>MEX3A</i>        | chr1  | Body    | 1.41 | (0.95; 2.09) | 9.0E-02 |
| cg07382588 | <i>CTDSPL2</i>      | chr15 | 5'UTR   | 0.7  | (0.47; 1.06) | 9.0E-02 |
| cg06395490 | <i>ZFP91</i>        | chr11 | Body    | 0.75 | (0.54; 1.05) | 9.0E-02 |
| cg10090141 | <i>CDH13</i>        | chr16 | Body    | 0.71 | (0.48; 1.05) | 9.0E-02 |
| cg23009067 | <i>GNA12</i>        | chr7  | Body    | 0.7  | (0.47; 1.06) | 9.0E-02 |
| cg21447550 | <i>SUSD4</i>        | chr1  | TSS1500 | 1.33 | (0.96; 1.84) | 9.0E-02 |
| cg03147750 | <i>PTPRN2</i>       | chr7  | TSS1500 | 0.76 | (0.55; 1.04) | 9.0E-02 |
| cg26816432 | <i>PTPRN2</i>       | chr7  | Body    | 0.72 | (0.49; 1.05) | 9.0E-02 |
| cg20093718 | <i>LOC100130933</i> | chr17 | 3'UTR   | 1.35 | (0.95; 1.9)  | 9.0E-02 |
| cg20093718 | <i>RECQL5</i>       | chr17 | Body    | 1.35 | (0.95; 1.9)  | 9.0E-02 |
| cg17137122 | <i>CTNND2</i>       | chr5  | Body    | 1.32 | (0.96; 1.81) | 9.0E-02 |



|            |           |       |         |      |              |         |
|------------|-----------|-------|---------|------|--------------|---------|
| cg17137122 | CTNND2    | chr5  | 5'UTR   | 1.32 | (0.96; 1.81) | 9.0E-02 |
| cg17137122 | CTNND2    | chr5  | TSS1500 | 1.32 | (0.96; 1.81) | 9.0E-02 |
| cg25384488 | COL1A2    | chr7  | Body    | 0.7  | (0.46; 1.06) | 9.0E-02 |
| cg21833144 | TDRP      | chr8  | TSS1500 | 1.44 | (0.94; 2.18) | 9.0E-02 |
| cg21833144 | TDRP      | chr8  | TSS200  | 1.44 | (0.94; 2.18) | 9.0E-02 |
| cg27099759 | ZFP91     | chr11 | Body    | 0.69 | (0.45; 1.06) | 9.0E-02 |
| cg01290565 | CUX2      | chr12 | Body    | 0.76 | (0.55; 1.04) | 9.1E-02 |
| cg21240214 | WAC       | chr10 | TSS200  | 0.69 | (0.45; 1.06) | 9.1E-02 |
| cg21240214 | WAC       | chr10 | 5'UTR   | 0.69 | (0.45; 1.06) | 9.1E-02 |
| cg07183450 | PTPRN2    | chr7  | Body    | 0.76 | (0.55; 1.05) | 9.1E-02 |
| cg20934445 | PTPRN2    | chr7  | Body    | 0.77 | (0.57; 1.04) | 9.1E-02 |
| cg25607592 | CHCHD6    | chr3  | Body    | 1.32 | (0.96; 1.82) | 9.1E-02 |
| cg16549043 | MEX3A     | chr1  | Body    | 0.74 | (0.52; 1.05) | 9.1E-02 |
| cg17050275 | TNRC18    | chr7  | Body    | 0.75 | (0.54; 1.05) | 9.1E-02 |
| cg09566021 | CREBBP    | chr16 | Body    | 1.45 | (0.94; 2.23) | 9.2E-02 |
| cg21435676 | SUSD4     | chr1  | Body    | 0.72 | (0.49; 1.05) | 9.2E-02 |
| cg12538880 | TNRC18    | chr7  | 5'UTR   | 1.3  | (0.96; 1.75) | 9.2E-02 |
| cg07710734 | TNRC6A    | chr16 | Body    | 0.74 | (0.52; 1.05) | 9.2E-02 |
| cg17606120 | CHD6      | chr20 | TSS1500 | 0.73 | (0.51; 1.05) | 9.2E-02 |
| cg25565504 | NRXN1     | chr2  | Body    | 0.74 | (0.52; 1.05) | 9.2E-02 |
| cg11913695 | PTPRN2    | chr7  | Body    | 0.75 | (0.54; 1.05) | 9.3E-02 |
| cg27638035 | BRUNOL4   | chr18 | Body    | 1.4  | (0.95; 2.09) | 9.3E-02 |
| cg03695236 | PTPRN2    | chr7  | Body    | 1.35 | (0.95; 1.91) | 9.3E-02 |
| cg01032359 | CUX2      | chr12 | Body    | 0.72 | (0.5; 1.06)  | 9.3E-02 |
| cg17701146 | PTPRN2    | chr7  | Body    | 0.68 | (0.44; 1.07) | 9.3E-02 |
| cg18114671 | NOL4      | chr18 | TSS1500 | 1.36 | (0.95; 1.96) | 9.3E-02 |
| cg10063179 | MTNR1A    | chr4  | Body    | 0.71 | (0.47; 1.06) | 9.3E-02 |
| cg03005767 | CTNND2    | chr5  | Body    | 1.32 | (0.95; 1.83) | 9.3E-02 |
| cg03005767 | CTNND2    | chr5  | 5'UTR   | 1.32 | (0.95; 1.83) | 9.3E-02 |
| cg23799720 | WWOX      | chr16 | 5'UTR   | 1.4  | (0.94; 2.08) | 9.3E-02 |
| cg23799720 | WWOX      | chr16 | Body    | 1.4  | (0.94; 2.08) | 9.3E-02 |
| cg23799720 | WWOX      | chr16 | 1stExon | 1.4  | (0.94; 2.08) | 9.3E-02 |
| cg00353353 | PTPRN2    | chr7  | Body    | 0.71 | (0.48; 1.06) | 9.4E-02 |
| cg14761242 | PTPRN2    | chr7  | Body    | 0.75 | (0.54; 1.05) | 9.4E-02 |
| cg17627898 | TAOK3     | chr12 | 5'UTR   | 0.49 | (0.22; 1.13) | 9.4E-02 |
| cg24784868 | ARID1A    | chr1  | Body    | 1.33 | (0.95; 1.84) | 9.4E-02 |
| cg21270083 | ZBTB20    | chr3  | Body    | 0.68 | (0.43; 1.07) | 9.4E-02 |
| cg21270083 | ZBTB20    | chr3  | 5'UTR   | 0.68 | (0.43; 1.07) | 9.4E-02 |
| cg12534371 | CDH13     | chr16 | Body    | 0.72 | (0.49; 1.06) | 9.4E-02 |
| cg27035480 | CREBBP    | chr16 | Body    | 1.62 | (0.92; 2.87) | 9.4E-02 |
| cg18067337 | PTPRS     | chr19 | Body    | 0.74 | (0.52; 1.05) | 9.4E-02 |
| cg08597719 | PTPRN2    | chr7  | Body    | 0.76 | (0.55; 1.05) | 9.4E-02 |
| cg17354303 | BARX1     | chr9  | Body    | 0.68 | (0.43; 1.07) | 9.5E-02 |
| cg04976245 | PTPRN2    | chr7  | Body    | 0.76 | (0.55; 1.05) | 9.5E-02 |
| cg11905658 | NRXN1     | chr2  | 5'UTR   | 0.7  | (0.47; 1.06) | 9.5E-02 |
| cg11905658 | NRXN1     | chr2  | 1stExon | 0.7  | (0.47; 1.06) | 9.5E-02 |
| cg07062857 | FBXO11    | chr2  | TSS1500 | 0.76 | (0.55; 1.05) | 9.5E-02 |
| cg22520850 | CUX2      | chr12 | Body    | 1.32 | (0.95; 1.83) | 9.5E-02 |
| cg04922684 | UNC80     | chr2  | Body    | 0.73 | (0.5; 1.06)  | 9.5E-02 |
| cg17253835 | DACH1     | chr13 | Body    | 1.32 | (0.95; 1.84) | 9.5E-02 |
| cg01582616 | PTPRN2    | chr7  | Body    | 0.69 | (0.45; 1.07) | 9.5E-02 |
| cg25911087 | SUGCT     | chr7  | Body    | 0.7  | (0.46; 1.06) | 9.5E-02 |
| cg27275781 | TNRC18    | chr7  | TSS1500 | 1.3  | (0.96; 1.76) | 9.5E-02 |
| cg01933718 | PTPRN2    | chr7  | Body    | 0.76 | (0.54; 1.05) | 9.5E-02 |
| cg17499241 | MEX3A     | chr1  | 1stExon | 0.75 | (0.54; 1.05) | 9.5E-02 |
| cg10724702 | DMXL2     | chr15 | TSS1500 | 0.62 | (0.35; 1.09) | 9.5E-02 |
| cg09279037 | PTPRN2    | chr7  | Body    | 0.75 | (0.54; 1.05) | 9.5E-02 |
| cg17003970 | CHFR      | chr12 | Body    | 1.28 | (0.96; 1.7)  | 9.6E-02 |
| cg00236302 | RAP1B     | chr12 | 5'UTR   | 0.63 | (0.37; 1.08) | 9.6E-02 |
| cg22187292 | TNFRSF11A | chr18 | Body    | 1.42 | (0.94; 2.14) | 9.6E-02 |
| cg21077902 | AKAP13    | chr15 | 5'UTR   | 0.75 | (0.53; 1.05) | 9.6E-02 |



|            |                |       |         |      |              |         |
|------------|----------------|-------|---------|------|--------------|---------|
| cg20011562 | <i>PHACTR1</i> | chr6  | Body    | 0.68 | (0.43; 1.07) | 9.6E-02 |
| cg01191920 | <i>PTPRN2</i>  | chr7  | Body    | 0.77 | (0.57; 1.05) | 9.6E-02 |
| cg14724213 | <i>MTCL1</i>   | chr18 | Body    | 0.75 | (0.53; 1.05) | 9.6E-02 |
| cg02505956 | <i>PTPRN2</i>  | chr7  | Body    | 1.29 | (0.96; 1.74) | 9.6E-02 |
| cg01849851 | <i>PEX14</i>   | chr1  | Body    | 0.71 | (0.48; 1.06) | 9.6E-02 |
| cg13474208 | <i>DMXL2</i>   | chr15 | Body    | 1.32 | (0.95; 1.83) | 9.7E-02 |
| cg04277631 | <i>TNR</i>     | chr1  | 5'UTR   | 0.77 | (0.56; 1.05) | 9.7E-02 |
| cg24107395 | <i>CHD6</i>    | chr20 | Body    | 1.37 | (0.94; 1.98) | 9.7E-02 |
| cg17169243 | <i>CTDSP2</i>  | chr12 | Body    | 1.48 | (0.93; 2.37) | 9.7E-02 |
| cg02157894 | <i>ATF7</i>    | chr12 | TSS1500 | 1.56 | (0.92; 2.64) | 9.7E-02 |
| cg02157894 | <i>ATF7</i>    | chr12 | 5'UTR   | 1.56 | (0.92; 2.64) | 9.7E-02 |
| cg01630177 | <i>PHACTR1</i> | chr6  | Body    | 0.72 | (0.49; 1.06) | 9.7E-02 |
| cg02794451 | <i>CACNA1C</i> | chr12 | 3'UTR   | 1.3  | (0.95; 1.76) | 9.7E-02 |
| cg02576975 | <i>PTPRS</i>   | chr19 | 5'UTR   | 0.59 | (0.32; 1.1)  | 9.8E-02 |
| cg09069435 | <i>RNU5E-1</i> | chr5  | Body    | 1.53 | (0.93; 2.53) | 9.8E-02 |
| cg16477262 | <i>CTDSPL</i>  | chr3  | Body    | 1.37 | (0.94; 2)    | 9.8E-02 |
| cg08200878 | <i>TAOK3</i>   | chr12 | Body    | 0.73 | (0.5; 1.06)  | 9.8E-02 |
| cg05012972 | <i>PTPRN2</i>  | chr7  | Body    | 1.32 | (0.95; 1.82) | 9.8E-02 |
| cg20380649 | <i>CTNND2</i>  | chr5  | Body    | 0.77 | (0.56; 1.05) | 9.8E-02 |
| cg02110656 | <i>TAOK3</i>   | chr12 | Body    | 0.75 | (0.53; 1.06) | 9.8E-02 |
| cg03679716 | <i>FBXO31</i>  | chr16 | Body    | 0.69 | (0.45; 1.07) | 9.8E-02 |
| cg14585296 | <i>PTPRN2</i>  | chr7  | Body    | 1.31 | (0.95; 1.8)  | 9.8E-02 |
| cg09992350 | <i>PTPRN2</i>  | chr7  | Body    | 0.77 | (0.56; 1.05) | 9.8E-02 |
| cg21726913 | <i>PDE8A</i>   | chr15 | TSS1500 | 0.76 | (0.55; 1.05) | 9.9E-02 |
| cg16151354 | <i>DACH1</i>   | chr13 | Body    | 1.3  | (0.95; 1.79) | 9.9E-02 |
| cg02161503 | <i>PTPRN2</i>  | chr7  | Body    | 0.75 | (0.54; 1.05) | 9.9E-02 |
| cg23434264 | <i>AKAP13</i>  | chr15 | Body    | 0.72 | (0.49; 1.06) | 9.9E-02 |
| cg00547139 | <i>PTPRN2</i>  | chr7  | Body    | 1.39 | (0.94; 2.06) | 9.9E-02 |
| cg10403292 | <i>PTPRN2</i>  | chr7  | Body    | 1.37 | (0.94; 1.99) | 9.9E-02 |
| cg00694512 | <i>CHCHD6</i>  | chr3  | TSS200  | 1.29 | (0.95; 1.76) | 9.9E-02 |
| cg23260731 | <i>ATP6V0C</i> | chr16 | 1stExon | 0.76 | (0.55; 1.05) | 9.9E-02 |
| cg23260731 | <i>ATP6V0C</i> | chr16 | 5'UTR   | 0.76 | (0.55; 1.05) | 9.9E-02 |
| cg12897164 | <i>FBXO32</i>  | chr8  | 5'UTR   | 1.77 | (0.9; 3.47)  | 9.9E-02 |
| cg12897164 | <i>FBXO32</i>  | chr8  | Body    | 1.77 | (0.9; 3.47)  | 9.9E-02 |
| cg13985767 | <i>GNA12</i>   | chr7  | Body    | 0.73 | (0.51; 1.06) | 9.9E-02 |
| cg12661624 | <i>PTPRN2</i>  | chr7  | Body    | 0.76 | (0.55; 1.05) | 9.9E-02 |
| cg20450337 | <i>PTPRS</i>   | chr19 | Body    | 1.33 | (0.95; 1.85) | 1.0E-01 |
| cg06413087 | <i>PTPRN2</i>  | chr7  | Body    | 0.76 | (0.55; 1.05) | 1.0E-01 |
| cg09510202 | <i>PHACTR1</i> | chr6  | Body    | 0.72 | (0.49; 1.06) | 1.0E-01 |
| cg06804581 | <i>ACVR2A</i>  | chr2  | 5'UTR   | 0.61 | (0.34; 1.1)  | 1.0E-01 |
| cg06804581 | <i>ACVR2A</i>  | chr2  | TSS200  | 0.61 | (0.34; 1.1)  | 1.0E-01 |
| cg17946266 | <i>PHACTR1</i> | chr6  | Body    | 0.69 | (0.45; 1.07) | 1.0E-01 |
| cg22692013 | <i>CACNA1C</i> | chr12 | Body    | 1.32 | (0.95; 1.84) | 1.0E-01 |
| cg05082805 | <i>CNTNAP2</i> | chr7  | Body    | 1.6  | (0.91; 2.82) | 1.0E-01 |
| cg25045630 | <i>PTPRN2</i>  | chr7  | Body    | 0.76 | (0.54; 1.05) | 1.0E-01 |
| cg12866112 | <i>PTPRN2</i>  | chr7  | Body    | 0.72 | (0.48; 1.07) | 1.0E-01 |
| cg05224015 | <i>PTPRN2</i>  | chr7  | Body    | 1.37 | (0.94; 2)    | 1.0E-01 |
| cg06191815 | <i>ERI3</i>    | chr1  | Body    | 1.33 | (0.95; 1.87) | 1.0E-01 |
| cg23415810 | <i>ATF7</i>    | chr12 | Body    | 1.39 | (0.94; 2.06) | 1.0E-01 |
| cg06017659 | <i>PTPRN2</i>  | chr7  | Body    | 0.74 | (0.52; 1.06) | 1.0E-01 |
| cg20518511 | <i>TNRC18</i>  | chr7  | Body    | 0.64 | (0.37; 1.09) | 1.0E-01 |
| cg09373730 | <i>NRXN1</i>   | chr2  | Body    | 1.33 | (0.95; 1.86) | 1.0E-01 |
| cg11531198 | <i>ALCAM</i>   | chr3  | TSS1500 | 1.48 | (0.93; 2.35) | 1.0E-01 |
| cg25581124 | <i>DMXL2</i>   | chr15 | Body    | 0.7  | (0.45; 1.07) | 1.0E-01 |
| cg04631584 | <i>PHACTR1</i> | chr6  | Body    | 0.73 | (0.5; 1.06)  | 1.0E-01 |
| cg06252160 | <i>WWOX</i>    | chr16 | Body    | 0.76 | (0.54; 1.06) | 1.0E-01 |
| cg09889256 | <i>TNRC6A</i>  | chr16 | Body    | 0.76 | (0.54; 1.06) | 1.0E-01 |
| cg25665603 | <i>ALCAM</i>   | chr3  | TSS200  | 0.77 | (0.56; 1.05) | 1.0E-01 |
| cg26875655 | <i>CUX2</i>    | chr12 | Body    | 0.72 | (0.49; 1.07) | 1.0E-01 |
| cg20739510 | <i>PEX14</i>   | chr1  | TSS200  | 0.76 | (0.54; 1.06) | 1.0E-01 |
| cg26949467 | <i>FBXO11</i>  | chr2  | 1stExon | 0.74 | (0.52; 1.06) | 1.0E-01 |



|            |                |       |         |      |              |         |
|------------|----------------|-------|---------|------|--------------|---------|
| cg02829656 | <i>CPEB1</i>   | chr15 | Body    | 1.44 | (0.93; 2.22) | 1.0E-01 |
| cg02829656 | <i>CPEB1</i>   | chr15 | 5'UTR   | 1.44 | (0.93; 2.22) | 1.0E-01 |
| cg06356698 | <i>CPEB1</i>   | chr15 | Body    | 0.75 | (0.53; 1.06) | 1.0E-01 |
| cg06356698 | <i>CPEB1</i>   | chr15 | 5'UTR   | 0.75 | (0.53; 1.06) | 1.0E-01 |
| cg06874640 | <i>PHACTR1</i> | chr6  | TSS1500 | 0.73 | (0.5; 1.06)  | 1.0E-01 |
| cg21597685 | <i>PTPRN2</i>  | chr7  | Body    | 1.37 | (0.94; 2.01) | 1.0E-01 |
| cg04272757 | <i>AKAP13</i>  | chr15 | Body    | 0.78 | (0.58; 1.05) | 1.0E-01 |
| cg23172590 | <i>CTDSP2</i>  | chr12 | 1stExon | 0.74 | (0.52; 1.06) | 1.0E-01 |
| cg23172590 | <i>CTDSP2</i>  | chr12 | 5'UTR   | 0.74 | (0.52; 1.06) | 1.0E-01 |
| cg17646855 | <i>PTPRN2</i>  | chr7  | Body    | 1.34 | (0.94; 1.89) | 1.0E-01 |
| cg15974196 | <i>CTNND2</i>  | chr5  | Body    | 1.95 | (0.88; 4.34) | 1.0E-01 |
| cg00880674 | <i>BARX2</i>   | chr11 | Body    | 0.75 | (0.53; 1.06) | 1.0E-01 |
| cg16796151 | <i>PTPRN2</i>  | chr7  | Body    | 1.33 | (0.94; 1.87) | 1.0E-01 |
| cg14799696 | <i>PTPRN2</i>  | chr7  | Body    | 1.33 | (0.94; 1.87) | 1.0E-01 |
| cg00955290 | <i>WAC</i>     | chr10 | TSS200  | 0.75 | (0.53; 1.06) | 1.0E-01 |
| cg00955290 | <i>WAC</i>     | chr10 | Body    | 0.75 | (0.53; 1.06) | 1.0E-01 |
| cg12161122 | <i>BRUNOL4</i> | chr18 | TSS200  | 0.7  | (0.46; 1.07) | 1.0E-01 |
| cg20349753 | <i>ELAVL4</i>  | chr1  | Body    | 0.73 | (0.49; 1.07) | 1.0E-01 |
| cg24544309 | <i>ARID1A</i>  | chr1  | Body    | 1.36 | (0.94; 1.97) | 1.0E-01 |
| cg12381873 | <i>DNAI2</i>   | chr17 | TSS1500 | 0.76 | (0.55; 1.06) | 1.0E-01 |
| cg01155916 | <i>FBXO38</i>  | chr5  | TSS1500 | 0.75 | (0.54; 1.06) | 1.0E-01 |
| cg10578110 | <i>CUX2</i>    | chr12 | Body    | 0.76 | (0.55; 1.06) | 1.0E-01 |
| cg06894149 | <i>CHD6</i>    | chr20 | Body    | 0.78 | (0.57; 1.05) | 1.0E-01 |
| cg23110415 | <i>SMARCD3</i> | chr7  | TSS1500 | 0.67 | (0.42; 1.08) | 1.0E-01 |
| cg11730685 | <i>PTPRN2</i>  | chr7  | Body    | 0.78 | (0.58; 1.05) | 1.0E-01 |
| cg05396320 | <i>CACNA1C</i> | chr12 | ExonBnd | 0.63 | (0.36; 1.1)  | 1.0E-01 |
| cg05396320 | <i>CACNA1C</i> | chr12 | Body    | 0.63 | (0.36; 1.1)  | 1.0E-01 |
| cg12363722 | <i>MTNR1A</i>  | chr4  | TSS200  | 0.63 | (0.36; 1.1)  | 1.0E-01 |
| cg24402559 | <i>CDH13</i>   | chr16 | 5'UTR   | 1.35 | (0.94; 1.93) | 1.0E-01 |
| cg24402559 | <i>CDH13</i>   | chr16 | Body    | 1.35 | (0.94; 1.93) | 1.0E-01 |
| cg20015729 | <i>UBE2E2</i>  | chr3  | Body    | 1.35 | (0.94; 1.95) | 1.0E-01 |
| cg13636543 | <i>PTPRN2</i>  | chr7  | Body    | 1.33 | (0.94; 1.87) | 1.0E-01 |
| cg11608521 | <i>RNU5E-1</i> | chr5  | Body    | 0.74 | (0.51; 1.07) | 1.0E-01 |
| cg09690040 | <i>CHCHD6</i>  | chr3  | Body    | 0.74 | (0.51; 1.06) | 1.0E-01 |
| cg05708375 | <i>NOL4L</i>   | chr20 | Body    | 0.76 | (0.54; 1.06) | 1.0E-01 |
| cg16982929 | <i>CTNND2</i>  | chr5  | Body    | 1.32 | (0.94; 1.85) | 1.0E-01 |
| cg20227944 | <i>CUX2</i>    | chr12 | Body    | 1.75 | (0.89; 3.43) | 1.0E-01 |
| cg23087020 | <i>POU2F1</i>  | chr1  | 5'UTR   | 0.66 | (0.4; 1.09)  | 1.0E-01 |
| cg00148035 | <i>CUX2</i>    | chr12 | Body    | 1.42 | (0.93; 2.18) | 1.0E-01 |
| cg08267336 | <i>POU2F1</i>  | chr1  | Body    | 0.52 | (0.24; 1.14) | 1.0E-01 |
| cg08267336 | <i>POU2F1</i>  | chr1  | TSS200  | 0.52 | (0.24; 1.14) | 1.0E-01 |
| cg19271753 | <i>TNRC18</i>  | chr7  | Body    | 0.74 | (0.51; 1.06) | 1.0E-01 |
| cg10823320 | <i>CUX2</i>    | chr12 | Body    | 1.41 | (0.93; 2.12) | 1.0E-01 |
| cg04680282 | <i>RECQL5</i>  | chr17 | Body    | 1.45 | (0.93; 2.26) | 1.0E-01 |
| cg22668002 | <i>TNRC18</i>  | chr7  | Body    | 1.31 | (0.95; 1.8)  | 1.0E-01 |
| cg16708047 | <i>TENM2</i>   | chr5  | Body    | 0.74 | (0.52; 1.06) | 1.1E-01 |
| cg01866861 | <i>NRXN1</i>   | chr2  | Body    | 0.7  | (0.45; 1.08) | 1.1E-01 |
| cg14797308 | <i>POU2F1</i>  | chr1  | Body    | 0.52 | (0.24; 1.15) | 1.1E-01 |
| cg14797308 | <i>POU2F1</i>  | chr1  | TSS200  | 0.52 | (0.24; 1.15) | 1.1E-01 |
| cg13752708 | <i>PTPRN2</i>  | chr7  | Body    | 0.76 | (0.55; 1.06) | 1.1E-01 |
| cg19536177 | <i>CUX2</i>    | chr12 | Body    | 1.33 | (0.94; 1.88) | 1.1E-01 |
| cg08051310 | <i>PHACTR1</i> | chr6  | Body    | 0.76 | (0.55; 1.06) | 1.1E-01 |
| cg24938830 | <i>UNC80</i>   | chr2  | TSS200  | 0.69 | (0.44; 1.08) | 1.1E-01 |
| cg05963085 | <i>CCDC80</i>  | chr3  | 5'UTR   | 0.7  | (0.45; 1.08) | 1.1E-01 |
| cg05963085 | <i>CCDC80</i>  | chr3  | 1stExon | 0.7  | (0.45; 1.08) | 1.1E-01 |
| cg03951374 | <i>MEIS2</i>   | chr15 | 5'UTR   | 1.4  | (0.93; 2.12) | 1.1E-01 |
| cg03951374 | <i>MEIS2</i>   | chr15 | 1stExon | 1.4  | (0.93; 2.12) | 1.1E-01 |
| cg03951374 | <i>MEIS2</i>   | chr15 | Body    | 1.4  | (0.93; 2.12) | 1.1E-01 |
| cg07306604 | <i>RTN4R</i>   | chr22 | Body    | 1.38 | (0.93; 2.03) | 1.1E-01 |
| cg05971373 | <i>PTPRN2</i>  | chr7  | Body    | 0.75 | (0.52; 1.06) | 1.1E-01 |
| cg20592656 | <i>TNRC18</i>  | chr7  | Body    | 1.32 | (0.94; 1.86) | 1.1E-01 |



|            |              |       |         |      |              |         |
|------------|--------------|-------|---------|------|--------------|---------|
| cg20850204 | TAOK3        | chr12 | Body    | 1.29 | (0.95; 1.74) | 1.1E-01 |
| cg21827294 | CHFR         | chr12 | Body    | 1.35 | (0.94; 1.95) | 1.1E-01 |
| cg24900931 | COL5A2       | chr2  | Body    | 1.46 | (0.92; 2.31) | 1.1E-01 |
| cg15335334 | LOC100130933 | chr17 | TSS200  | 2.09 | (0.85; 5.1)  | 1.1E-01 |
| cg15335334 | RECQL5       | chr17 | Body    | 2.09 | (0.85; 5.1)  | 1.1E-01 |
| cg13740979 | TNFRSF10B    | chr8  | Body    | 1.41 | (0.93; 2.15) | 1.1E-01 |
| cg19978041 | CACNA1C-AS4  | chr12 | TSS200  | 0.77 | (0.56; 1.06) | 1.1E-01 |
| cg19978041 | CACNA1C      | chr12 | Body    | 0.77 | (0.56; 1.06) | 1.1E-01 |
| cg26462892 | AKAP13       | chr15 | Body    | 0.75 | (0.52; 1.07) | 1.1E-01 |
| cg06124066 | PTPRN2       | chr7  | Body    | 1.31 | (0.94; 1.81) | 1.1E-01 |
| cg09494582 | NRXN1        | chr2  | Body    | 1.29 | (0.95; 1.76) | 1.1E-01 |
| cg14980255 | MEIS2        | chr15 | Body    | 0.76 | (0.55; 1.06) | 1.1E-01 |
| cg12819762 | CDH13        | chr16 | 5'UTR   | 0.71 | (0.46; 1.08) | 1.1E-01 |
| cg12819762 | CDH13        | chr16 | Body    | 0.71 | (0.46; 1.08) | 1.1E-01 |
| cg09844805 | HMGB4        | chr1  | TSS1500 | 0.75 | (0.52; 1.07) | 1.1E-01 |
| cg09844805 | CSMD2        | chr1  | Body    | 0.75 | (0.52; 1.07) | 1.1E-01 |
| cg22950904 | TNFRSF19     | chr13 | Body    | 0.65 | (0.39; 1.1)  | 1.1E-01 |
| cg09847283 | PTPRN2       | chr7  | Body    | 0.75 | (0.53; 1.06) | 1.1E-01 |
| cg10672108 | CNTF         | chr11 | TSS200  | 0.74 | (0.51; 1.07) | 1.1E-01 |
| cg08722213 | PTPRS        | chr19 | 5'UTR   | 1.32 | (0.94; 1.87) | 1.1E-01 |
| cg04254167 | WVOX         | chr16 | Body    | 0.75 | (0.53; 1.06) | 1.1E-01 |
| cg09849688 | ARID1A       | chr1  | Body    | 0.67 | (0.41; 1.09) | 1.1E-01 |
| cg26881899 | NRXN1        | chr2  | Body    | 1.3  | (0.94; 1.79) | 1.1E-01 |
| cg17322774 | PTPRN2       | chr7  | Body    | 1.49 | (0.92; 2.41) | 1.1E-01 |
| cg15633082 | PTPRN2       | chr7  | Body    | 0.66 | (0.39; 1.1)  | 1.1E-01 |
| cg12241599 | MEIS2        | chr15 | Body    | 1.51 | (0.91; 2.5)  | 1.1E-01 |
| cg08004406 | UBE2E2       | chr3  | Body    | 1.33 | (0.94; 1.89) | 1.1E-01 |
| cg14329860 | NRXN1        | chr2  | Body    | 1.73 | (0.89; 3.39) | 1.1E-01 |
| cg27445134 | MTCL1        | chr18 | Body    | 1.41 | (0.93; 2.14) | 1.1E-01 |
| cg12284600 | CTNND2       | chr5  | Body    | 0.7  | (0.45; 1.08) | 1.1E-01 |
| cg12284600 | CTNND2       | chr5  | 5'UTR   | 0.7  | (0.45; 1.08) | 1.1E-01 |
| cg12284600 | CTNND2       | chr5  | TSS1500 | 0.7  | (0.45; 1.08) | 1.1E-01 |
| cg21638374 | FBXO38       | chr5  | TSS200  | 1.51 | (0.91; 2.49) | 1.1E-01 |
| cg26967842 | PTPRN2       | chr7  | Body    | 1.34 | (0.94; 1.93) | 1.1E-01 |
| cg01365766 | WVOX         | chr16 | Body    | 1.38 | (0.93; 2.03) | 1.1E-01 |
| cg07831256 | FBXO31       | chr16 | ExonBnd | 0.6  | (0.32; 1.12) | 1.1E-01 |
| cg07831256 | FBXO31       | chr16 | 5'UTR   | 0.6  | (0.32; 1.12) | 1.1E-01 |
| cg03276353 | TAOK3        | chr12 | 5'UTR   | 0.74 | (0.51; 1.07) | 1.1E-01 |
| cg27299033 | RTN4RL1      | chr17 | Body    | 1.41 | (0.93; 2.13) | 1.1E-01 |
| cg16485976 | NOL4L        | chr20 | Body    | 1.32 | (0.94; 1.84) | 1.1E-01 |
| cg05090717 | CTDSPL       | chr3  | Body    | 0.69 | (0.44; 1.09) | 1.1E-01 |
| cg21525946 | TENM2        | chr5  | Body    | 0.79 | (0.59; 1.05) | 1.1E-01 |
| cg21491235 | RAP1B        | chr12 | 5'UTR   | 0.77 | (0.55; 1.06) | 1.1E-01 |
| cg21991536 | NOL4L        | chr20 | Body    | 1.4  | (0.93; 2.11) | 1.1E-01 |
| cg20905910 | CHCHD6       | chr3  | Body    | 0.39 | (0.13; 1.23) | 1.1E-01 |
| cg09672286 | ZBTB20       | chr3  | Body    | 0.79 | (0.6; 1.05)  | 1.1E-01 |
| cg09672286 | ZBTB20       | chr3  | 5'UTR   | 0.79 | (0.6; 1.05)  | 1.1E-01 |
| cg21148404 | BRUNOL4      | chr18 | 3'UTR   | 0.74 | (0.51; 1.07) | 1.1E-01 |
| cg10576019 | CUX2         | chr12 | Body    | 0.75 | (0.53; 1.07) | 1.1E-01 |
| cg16381530 | TSHZ3        | chr19 | Body    | 0.77 | (0.56; 1.06) | 1.1E-01 |
| cg10978002 | NRXN1        | chr2  | Body    | 1.34 | (0.94; 1.9)  | 1.1E-01 |
| cg16493407 | MTCL1        | chr18 | Body    | 0.72 | (0.49; 1.08) | 1.1E-01 |
| cg24639176 | PHACTR1      | chr6  | Body    | 1.38 | (0.93; 2.06) | 1.1E-01 |
| cg06651119 | CDH13        | chr16 | Body    | 1.31 | (0.94; 1.82) | 1.1E-01 |
| cg14249528 | RTN4RL1      | chr17 | Body    | 0.72 | (0.48; 1.08) | 1.1E-01 |
| cg02917381 | MEIS2        | chr15 | 5'UTR   | 0.77 | (0.55; 1.06) | 1.1E-01 |
| cg02917381 | MEIS2        | chr15 | 1stExon | 0.77 | (0.55; 1.06) | 1.1E-01 |
| cg02917381 | MEIS2        | chr15 | TSS1500 | 0.77 | (0.55; 1.06) | 1.1E-01 |
| cg25520872 | ZNF704       | chr8  | Body    | 1.39 | (0.93; 2.07) | 1.1E-01 |
| cg22377978 | PTPRN2       | chr7  | Body    | 0.76 | (0.55; 1.06) | 1.1E-01 |
| cg17980184 | PTPRN2       | chr7  | Body    | 0.73 | (0.49; 1.08) | 1.1E-01 |



|            |                  |       |         |      |              |         |
|------------|------------------|-------|---------|------|--------------|---------|
| cg01161698 | <i>FBXO38</i>    | chr5  | Body    | 0.76 | (0.55; 1.06) | 1.1E-01 |
| cg11291456 | <i>RAP1B</i>     | chr12 | 5'UTR   | 0.75 | (0.52; 1.07) | 1.1E-01 |
| cg00366722 | <i>MEIS2</i>     | chr15 | TSS200  | 0.7  | (0.45; 1.09) | 1.1E-01 |
| cg00366722 | <i>MEIS2</i>     | chr15 | TSS1500 | 0.7  | (0.45; 1.09) | 1.1E-01 |
| cg02562602 | <i>PTPRN2</i>    | chr7  | Body    | 1.3  | (0.94; 1.79) | 1.1E-01 |
| cg13041975 | <i>TXNDC9</i>    | chr2  | 1stExon | 0.78 | (0.57; 1.06) | 1.1E-01 |
| cg13041975 | <i>TXNDC9</i>    | chr2  | 5'UTR   | 0.78 | (0.57; 1.06) | 1.1E-01 |
| cg01480384 | <i>ATF7</i>      | chr12 | TSS1500 | 0.74 | (0.52; 1.07) | 1.1E-01 |
| cg12107643 | <i>PTPRS</i>     | chr19 | Body    | 1.3  | (0.94; 1.78) | 1.1E-01 |
| cg18445715 | <i>COL5A2</i>    | chr2  | Body    | 1.4  | (0.92; 2.12) | 1.1E-01 |
| cg03998264 | <i>ATF7</i>      | chr12 | Body    | 0.43 | (0.15; 1.22) | 1.1E-01 |
| cg00691586 | <i>AKAP13</i>    | chr15 | Body    | 0.73 | (0.5; 1.08)  | 1.1E-01 |
| cg22529607 | <i>PDE8A</i>     | chr15 | Body    | 1.47 | (0.91; 2.36) | 1.1E-01 |
| cg02392124 | <i>WAC</i>       | chr10 | Body    | 1.57 | (0.9; 2.75)  | 1.1E-01 |
| cg09044981 | <i>CDH13</i>     | chr16 | Body    | 0.79 | (0.59; 1.06) | 1.1E-01 |
| cg20299485 | <i>FBXO38</i>    | chr5  | Body    | 0.75 | (0.53; 1.07) | 1.1E-01 |
| cg05725666 | <i>CACNA1C</i>   | chr12 | Body    | 0.71 | (0.46; 1.08) | 1.1E-01 |
| cg19567168 | <i>TNFRSF1A</i>  | chr12 | Body    | 0.78 | (0.58; 1.06) | 1.1E-01 |
| cg00826640 | <i>PTPRN2</i>    | chr7  | Body    | 1.37 | (0.93; 2.02) | 1.1E-01 |
| cg09599652 | <i>ZNF704</i>    | chr8  | Body    | 0.64 | (0.37; 1.11) | 1.1E-01 |
| cg10066043 | <i>PTPRN2</i>    | chr7  | Body    | 1.26 | (0.95; 1.68) | 1.1E-01 |
| cg01918627 | <i>POU2F1</i>    | chr1  | Body    | 0.75 | (0.52; 1.07) | 1.1E-01 |
| cg13739406 | <i>POU2F1</i>    | chr1  | ExonBnd | 1.39 | (0.93; 2.09) | 1.1E-01 |
| cg13739406 | <i>POU2F1</i>    | chr1  | Body    | 1.39 | (0.93; 2.09) | 1.1E-01 |
| cg18575602 | <i>CHFR</i>      | chr12 | Body    | 0.78 | (0.57; 1.06) | 1.1E-01 |
| cg20368294 | <i>WWOX</i>      | chr16 | Body    | 1.41 | (0.92; 2.15) | 1.1E-01 |
| cg17251643 | <i>WWOX</i>      | chr16 | Body    | 0.75 | (0.52; 1.07) | 1.1E-01 |
| cg25160042 | <i>SUGCT</i>     | chr7  | Body    | 0.74 | (0.51; 1.07) | 1.1E-01 |
| cg21102477 | <i>CSMD2</i>     | chr1  | Body    | 0.75 | (0.52; 1.07) | 1.1E-01 |
| cg01462349 | <i>PTPRN2</i>    | chr7  | Body    | 1.61 | (0.89; 2.89) | 1.1E-01 |
| cg10466626 | <i>WWOX</i>      | chr16 | Body    | 1.3  | (0.94; 1.81) | 1.1E-01 |
| cg26700469 | <i>WWOX</i>      | chr16 | Body    | 1.44 | (0.91; 2.28) | 1.1E-01 |
| cg22761819 | <i>CACNA1C</i>   | chr12 | Body    | 1.38 | (0.92; 2.06) | 1.1E-01 |
| cg25157001 | <i>CTDSP2</i>    | chr12 | TSS1500 | 1.32 | (0.93; 1.86) | 1.2E-01 |
| cg15927566 | <i>ATP8A1</i>    | chr4  | Body    | 1.58 | (0.89; 2.79) | 1.2E-01 |
| cg26689848 | <i>PTPRN2</i>    | chr7  | Body    | 1.29 | (0.94; 1.77) | 1.2E-01 |
| cg11779204 | <i>CTNND2</i>    | chr5  | Body    | 0.74 | (0.5; 1.08)  | 1.2E-01 |
| cg13645221 | <i>PHACTR1</i>   | chr6  | Body    | 0.76 | (0.55; 1.07) | 1.2E-01 |
| cg18970103 | <i>CNTNAP2</i>   | chr7  | Body    | 0.77 | (0.56; 1.07) | 1.2E-01 |
| cg22094953 | <i>TNRC6C</i>    | chr17 | TSS1500 | 0.77 | (0.56; 1.07) | 1.2E-01 |
| cg25934969 | <i>COL5A2</i>    | chr2  | Body    | 1.34 | (0.93; 1.93) | 1.2E-01 |
| cg02283042 | <i>CDH13</i>     | chr16 | Body    | 0.71 | (0.46; 1.09) | 1.2E-01 |
| cg16193245 | <i>PTPRN2</i>    | chr7  | Body    | 0.79 | (0.59; 1.06) | 1.2E-01 |
| cg19547274 | <i>CDH13</i>     | chr16 | Body    | 0.7  | (0.44; 1.09) | 1.2E-01 |
| cg22590522 | <i>RECQL5</i>    | chr17 | Body    | 1.42 | (0.92; 2.19) | 1.2E-01 |
| cg03874476 | <i>WWOX</i>      | chr16 | Body    | 0.74 | (0.51; 1.08) | 1.2E-01 |
| cg17946161 | <i>TNFRSF1B</i>  | chr1  | Body    | 1.55 | (0.9; 2.7)   | 1.2E-01 |
| cg09905811 | <i>NRXN1</i>     | chr2  | 5'UTR   | 1.35 | (0.93; 1.97) | 1.2E-01 |
| cg01935331 | <i>MTCL1</i>     | chr18 | Body    | 0.77 | (0.55; 1.07) | 1.2E-01 |
| cg26529778 | <i>NOL4</i>      | chr18 | Body    | 0.77 | (0.55; 1.07) | 1.2E-01 |
| cg27289137 | <i>UBE2E2</i>    | chr3  | Body    | 0.74 | (0.51; 1.08) | 1.2E-01 |
| cg00219151 | <i>SLC16A9</i>   | chr10 | TSS1500 | 1.37 | (0.93; 2.02) | 1.2E-01 |
| cg27177391 | <i>ATF7</i>      | chr12 | TSS1500 | 1.3  | (0.94; 1.8)  | 1.2E-01 |
| cg10516823 | <i>ERI3</i>      | chr1  | TSS200  | 0.79 | (0.58; 1.06) | 1.2E-01 |
| cg07315745 | <i>BARX2</i>     | chr11 | TSS200  | 0.71 | (0.46; 1.09) | 1.2E-01 |
| cg01407244 | <i>TNFRSF10C</i> | chr8  | Body    | 0.77 | (0.55; 1.07) | 1.2E-01 |
| cg06840100 | <i>RNU5E-1</i>   | chr5  | Body    | 0.73 | (0.49; 1.08) | 1.2E-01 |
| cg07165288 | <i>ZBTB20</i>    | chr3  | 5'UTR   | 1.32 | (0.93; 1.86) | 1.2E-01 |
| cg16207991 | <i>PHACTR1</i>   | chr6  | Body    | 1.34 | (0.93; 1.94) | 1.2E-01 |
| cg05943636 | <i>CACNA1C</i>   | chr12 | Body    | 1.33 | (0.93; 1.9)  | 1.2E-01 |
| cg14842970 | <i>NOL4</i>      | chr18 | Body    | 1.37 | (0.92; 2.04) | 1.2E-01 |



|            |                 |       |         |      |              |         |
|------------|-----------------|-------|---------|------|--------------|---------|
| cg04083678 | <i>ERI3</i>     | chr1  | Body    | 0.76 | (0.54; 1.07) | 1.2E-01 |
| cg04083678 | <i>ERI3</i>     | chr1  | 5'UTR   | 0.76 | (0.54; 1.07) | 1.2E-01 |
| cg08122051 | <i>WVOX</i>     | chr16 | Body    | 1.3  | (0.94; 1.82) | 1.2E-01 |
| cg25302419 | <i>CTNND2</i>   | chr5  | 5'UTR   | 0.74 | (0.51; 1.08) | 1.2E-01 |
| cg25302419 | <i>CTNND2</i>   | chr5  | 1stExon | 0.74 | (0.51; 1.08) | 1.2E-01 |
| cg02703822 | <i>ZNF704</i>   | chr8  | Body    | 0.7  | (0.44; 1.1)  | 1.2E-01 |
| cg01269617 | <i>CUX2</i>     | chr12 | Body    | 0.77 | (0.56; 1.07) | 1.2E-01 |
| cg06146784 | <i>NOL4L</i>    | chr20 | Body    | 1.3  | (0.94; 1.81) | 1.2E-01 |
| cg15162335 | <i>RECQL</i>    | chr12 | 1stExon | 0.75 | (0.52; 1.08) | 1.2E-01 |
| cg15162335 | <i>GOLT1B</i>   | chr12 | TSS200  | 0.75 | (0.52; 1.08) | 1.2E-01 |
| cg15162335 | <i>RECQL</i>    | chr12 | 5'UTR   | 0.75 | (0.52; 1.08) | 1.2E-01 |
| cg04118006 | <i>CTDSP2</i>   | chr12 | Body    | 0.76 | (0.53; 1.07) | 1.2E-01 |
| cg18646784 | <i>ERI3</i>     | chr1  | Body    | 1.98 | (0.84; 4.64) | 1.2E-01 |
| cg18646784 | <i>ERI3</i>     | chr1  | 5'UTR   | 1.98 | (0.84; 4.64) | 1.2E-01 |
| cg24726661 | <i>CACNA1C</i>  | chr12 | Body    | 1.36 | (0.92; 2.02) | 1.2E-01 |
| cg17714807 | <i>PTPRN2</i>   | chr7  | Body    | 0.78 | (0.57; 1.06) | 1.2E-01 |
| cg01568490 | <i>NRXN1</i>    | chr2  | Body    | 0.73 | (0.5; 1.08)  | 1.2E-01 |
| cg01568490 | <i>NRXN1</i>    | chr2  | TSS1500 | 0.73 | (0.5; 1.08)  | 1.2E-01 |
| cg12392429 | <i>BRUNOL4</i>  | chr18 | Body    | 1.28 | (0.94; 1.74) | 1.2E-01 |
| cg08284826 | <i>CREBBP</i>   | chr16 | Body    | 0.77 | (0.55; 1.07) | 1.2E-01 |
| cg13978466 | <i>UNC80</i>    | chr2  | Body    | 1.38 | (0.92; 2.08) | 1.2E-01 |
| cg22497084 | <i>CACNA1C</i>  | chr12 | Body    | 0.77 | (0.56; 1.07) | 1.2E-01 |
| cg11107182 | <i>CSMD2</i>    | chr1  | Body    | 0.8  | (0.6; 1.06)  | 1.2E-01 |
| cg15507730 | <i>MEIS2</i>    | chr15 | 5'UTR   | 0.75 | (0.52; 1.08) | 1.2E-01 |
| cg15507730 | <i>MEIS2</i>    | chr15 | TSS1500 | 0.75 | (0.52; 1.08) | 1.2E-01 |
| cg01276970 | <i>NOL4L</i>    | chr20 | Body    | 1.62 | (0.88; 2.98) | 1.2E-01 |
| cg14922895 | <i>TNRC6B</i>   | chr22 | TSS200  | 1.3  | (0.93; 1.82) | 1.2E-01 |
| cg15557938 | <i>CSMD2</i>    | chr1  | 3'UTR   | 0.74 | (0.51; 1.08) | 1.2E-01 |
| cg24672611 | <i>CTDSP2</i>   | chr12 | Body    | 0.77 | (0.56; 1.07) | 1.2E-01 |
| cg22399511 | <i>ATP6V0C</i>  | chr16 | Body    | 1.28 | (0.94; 1.76) | 1.2E-01 |
| cg11132582 | <i>POU2F1</i>   | chr1  | 5'UTR   | 0.72 | (0.48; 1.09) | 1.2E-01 |
| cg07243230 | <i>RNU5E-1</i>  | chr5  | Body    | 1.69 | (0.87; 3.26) | 1.2E-01 |
| cg26335752 | <i>WAC</i>      | chr10 | Body    | 2.07 | (0.83; 5.17) | 1.2E-01 |
| cg00904407 | <i>PTPRN2</i>   | chr7  | Body    | 0.74 | (0.51; 1.08) | 1.2E-01 |
| cg18416290 | <i>TAOK3</i>    | chr12 | Body    | 0.7  | (0.45; 1.1)  | 1.2E-01 |
| cg09896544 | <i>MEIS2</i>    | chr15 | Body    | 1.3  | (0.93; 1.8)  | 1.2E-01 |
| cg26790395 | <i>EIF2S1</i>   | chr14 | TSS1500 | 1.3  | (0.93; 1.82) | 1.2E-01 |
| cg00537335 | <i>PTPRN2</i>   | chr7  | Body    | 0.75 | (0.53; 1.08) | 1.2E-01 |
| cg10978194 | <i>NOL4</i>     | chr18 | 5'UTR   | 0.78 | (0.57; 1.07) | 1.2E-01 |
| cg10978194 | <i>NOL4</i>     | chr18 | Body    | 0.78 | (0.57; 1.07) | 1.2E-01 |
| cg04802449 | <i>PTPRN2</i>   | chr7  | Body    | 1.31 | (0.93; 1.84) | 1.2E-01 |
| cg09305228 | <i>TNRC6B</i>   | chr22 | Body    | 1.58 | (0.89; 2.79) | 1.2E-01 |
| cg25533997 | <i>BRUNOL4</i>  | chr18 | Body    | 1.29 | (0.94; 1.76) | 1.2E-01 |
| cg20384620 | <i>PTPRN2</i>   | chr7  | Body    | 1.29 | (0.94; 1.79) | 1.2E-01 |
| cg08601018 | <i>NRXN1</i>    | chr2  | Body    | 0.76 | (0.54; 1.07) | 1.2E-01 |
| cg09306986 | <i>CREBBP</i>   | chr16 | Body    | 1.32 | (0.93; 1.87) | 1.2E-01 |
| cg12217560 | <i>TNFRSF19</i> | chr13 | 5'UTR   | 0.63 | (0.36; 1.13) | 1.2E-01 |
| cg12217560 | <i>TNFRSF19</i> | chr13 | 1stExon | 0.63 | (0.36; 1.13) | 1.2E-01 |
| cg08443882 | <i>CTDSPL</i>   | chr3  | Body    | 1.36 | (0.92; 2)    | 1.2E-01 |
| cg02417663 | <i>PTPRN2</i>   | chr7  | TSS200  | 0.79 | (0.59; 1.06) | 1.2E-01 |
| cg19071344 | <i>CACNA1C</i>  | chr12 | Body    | 1.33 | (0.93; 1.9)  | 1.2E-01 |
| cg26692859 | <i>ALCAM</i>    | chr3  | Body    | 0.76 | (0.54; 1.08) | 1.2E-01 |
| cg01238361 | <i>PTPRN2</i>   | chr7  | Body    | 0.74 | (0.51; 1.08) | 1.2E-01 |
| cg22493759 | <i>CREBBP</i>   | chr16 | Body    | 1.38 | (0.92; 2.07) | 1.2E-01 |
| cg25217583 | <i>ELAVL4</i>   | chr1  | TSS1500 | 0.75 | (0.52; 1.08) | 1.2E-01 |
| cg25217583 | <i>ELAVL4</i>   | chr1  | Body    | 0.75 | (0.52; 1.08) | 1.2E-01 |
| cg00846554 | <i>PHACTR1</i>  | chr6  | Body    | 0.71 | (0.46; 1.1)  | 1.2E-01 |
| cg14791799 | <i>TNFRSF19</i> | chr13 | Body    | 1.34 | (0.93; 1.93) | 1.2E-01 |
| cg19800406 | <i>CACNA1C</i>  | chr12 | Body    | 0.77 | (0.55; 1.07) | 1.2E-01 |
| cg19888535 | <i>FBXO32</i>   | chr8  | TSS200  | 1.31 | (0.93; 1.85) | 1.2E-01 |
| cg01397701 | <i>TAOK3</i>    | chr12 | TSS200  | 0.76 | (0.53; 1.08) | 1.2E-01 |



|            |           |       |         |      |              |         |
|------------|-----------|-------|---------|------|--------------|---------|
| cg11142484 | CSMD2     | chr1  | Body    | 0.65 | (0.38; 1.12) | 1.2E-01 |
| cg04264144 | ERI3      | chr1  | Body    | 0.77 | (0.55; 1.07) | 1.2E-01 |
| cg21966729 | NOL4L     | chr20 | TSS1500 | 1.34 | (0.93; 1.94) | 1.2E-01 |
| cg20456528 | TAOK3     | chr12 | Body    | 0.48 | (0.19; 1.22) | 1.2E-01 |
| cg27096172 | PTPRN2    | chr7  | Body    | 0.75 | (0.51; 1.08) | 1.2E-01 |
| cg22953510 | ZBTB20    | chr3  | 5'UTR   | 0.78 | (0.57; 1.07) | 1.2E-01 |
| cg22953510 | ZBTB20    | chr3  | Body    | 0.78 | (0.57; 1.07) | 1.2E-01 |
| cg06148656 | FBXO38    | chr5  | Body    | 1.42 | (0.91; 2.22) | 1.2E-01 |
| cg26577729 | TNRC18    | chr7  | 5'UTR   | 1.3  | (0.93; 1.81) | 1.2E-01 |
| cg18090200 | PTPRN2    | chr7  | Body    | 0.68 | (0.41; 1.11) | 1.2E-01 |
| cg04239715 | PTPRN2    | chr7  | Body    | 0.74 | (0.51; 1.08) | 1.2E-01 |
| cg25300624 | NDUFA9    | chr12 | Body    | 1.3  | (0.93; 1.83) | 1.2E-01 |
| cg15796392 | NOL4L     | chr20 | Body    | 1.38 | (0.92; 2.09) | 1.2E-01 |
| cg20757010 | TAOK3     | chr12 | 5'UTR   | 1.47 | (0.9; 2.38)  | 1.2E-01 |
| cg23594135 | SGIP1     | chr1  | Body    | 1.32 | (0.93; 1.89) | 1.2E-01 |
| cg11288769 | MEIS2     | chr15 | Body    | 0.78 | (0.57; 1.07) | 1.2E-01 |
| cg02729261 | DCUN1D4   | chr4  | Body    | 1.29 | (0.93; 1.78) | 1.2E-01 |
| cg01303998 | SRSF10    | chr1  | Body    | 0.75 | (0.53; 1.08) | 1.2E-01 |
| cg01303998 | SRSF10    | chr1  | 3'UTR   | 0.75 | (0.53; 1.08) | 1.2E-01 |
| cg15820033 | PTPRS     | chr19 | Body    | 0.77 | (0.55; 1.08) | 1.2E-01 |
| cg27456111 | NRXN1     | chr2  | Body    | 0.75 | (0.51; 1.08) | 1.2E-01 |
| cg08079693 | CHD6      | chr20 | 5'UTR   | 1.28 | (0.93; 1.76) | 1.2E-01 |
| cg08079693 | CHD6      | chr20 | 1stExon | 1.28 | (0.93; 1.76) | 1.2E-01 |
| cg03347095 | PTPRN2    | chr7  | Body    | 1.26 | (0.94; 1.7)  | 1.2E-01 |
| cg15983544 | TDRP      | chr8  | 3'UTR   | 0.78 | (0.56; 1.07) | 1.2E-01 |
| cg14947789 | FBXO34    | chr14 | TSS1500 | 0.77 | (0.56; 1.07) | 1.2E-01 |
| cg14947789 | FBXO34    | chr14 | 5'UTR   | 0.77 | (0.56; 1.07) | 1.2E-01 |
| cg22765612 | PTPRS     | chr19 | Body    | 1.41 | (0.91; 2.18) | 1.2E-01 |
| cg21009420 | CNTNAP2   | chr7  | Body    | 1.32 | (0.93; 1.87) | 1.2E-01 |
| cg26758209 | NRXN1     | chr2  | Body    | 0.73 | (0.49; 1.09) | 1.2E-01 |
| cg05665383 | PTPRN2    | chr7  | Body    | 1.32 | (0.93; 1.87) | 1.3E-01 |
| cg27363021 | DACH1     | chr13 | Body    | 1.45 | (0.9; 2.34)  | 1.3E-01 |
| cg05894462 | PTPRN2    | chr7  | Body    | 1.3  | (0.93; 1.81) | 1.3E-01 |
| cg07580615 | FBXO36    | chr2  | Body    | 1.36 | (0.92; 2.01) | 1.3E-01 |
| cg12161625 | TNRC18    | chr7  | Body    | 0.75 | (0.52; 1.08) | 1.3E-01 |
| cg26640919 | ORC4      | chr2  | 5'UTR   | 0.79 | (0.58; 1.07) | 1.3E-01 |
| cg26640919 | MBD5      | chr2  | TSS1500 | 0.79 | (0.58; 1.07) | 1.3E-01 |
| cg07371838 | GOLT1B    | chr12 | Body    | 0.76 | (0.54; 1.08) | 1.3E-01 |
| cg15986307 | GNA12     | chr7  | Body    | 0.76 | (0.53; 1.08) | 1.3E-01 |
| cg27142179 | CPEB1     | chr15 | TSS1500 | 1.4  | (0.91; 2.16) | 1.3E-01 |
| cg02004860 | AKAP13    | chr15 | Body    | 0.68 | (0.41; 1.11) | 1.3E-01 |
| cg09417971 | TNFRSF10D | chr8  | Body    | 0.76 | (0.54; 1.08) | 1.3E-01 |
| cg09417971 | TNFRSF10D | chr8  | ExonBnd | 0.76 | (0.54; 1.08) | 1.3E-01 |
| cg19110349 | NRXN1     | chr2  | Body    | 0.77 | (0.56; 1.07) | 1.3E-01 |
| cg07877559 | CTNND2    | chr5  | Body    | 0.78 | (0.56; 1.07) | 1.3E-01 |
| cg25120425 | PTPRN2    | chr7  | Body    | 0.78 | (0.57; 1.07) | 1.3E-01 |
| cg18123086 | FBXO31    | chr16 | TSS200  | 0.77 | (0.54; 1.08) | 1.3E-01 |
| cg18123086 | FBXO31    | chr16 | 5'UTR   | 0.77 | (0.54; 1.08) | 1.3E-01 |
| cg14157417 | PTPRN2    | chr7  | Body    | 0.76 | (0.54; 1.08) | 1.3E-01 |
| cg25903223 | PTPRN2    | chr7  | Body    | 0.78 | (0.56; 1.07) | 1.3E-01 |
| cg23965061 | TNFRSF10C | chr8  | 5'UTR   | 0.75 | (0.52; 1.08) | 1.3E-01 |
| cg23965061 | TNFRSF10C | chr8  | 1stExon | 0.75 | (0.52; 1.08) | 1.3E-01 |
| cg13077366 | BRUNOL4   | chr18 | Body    | 1.25 | (0.94; 1.68) | 1.3E-01 |
| cg23517301 | TNR       | chr1  | 5'UTR   | 0.69 | (0.43; 1.11) | 1.3E-01 |
| cg13142093 | PTPRN2    | chr7  | Body    | 0.77 | (0.55; 1.08) | 1.3E-01 |
| cg22612330 | ZBTB20    | chr3  | 5'UTR   | 1.29 | (0.93; 1.79) | 1.3E-01 |
| cg00016814 | CNTNAP2   | chr7  | Body    | 1.44 | (0.9; 2.31)  | 1.3E-01 |
| cg11427314 | PTPRN2    | chr7  | Body    | 0.77 | (0.55; 1.08) | 1.3E-01 |
| cg17670650 | PTPRU     | chr1  | Body    | 1.33 | (0.92; 1.93) | 1.3E-01 |
| cg05494565 | CDH13     | chr16 | Body    | 1.4  | (0.91; 2.16) | 1.3E-01 |
| cg27143007 | PTPRN2    | chr7  | Body    | 1.24 | (0.94; 1.65) | 1.3E-01 |



|            |                 |       |         |      |              |         |
|------------|-----------------|-------|---------|------|--------------|---------|
| cg25723910 | <i>DDHD2</i>    | chr8  | Body    | 1.32 | (0.92; 1.9)  | 1.3E-01 |
| cg02556360 | <i>TNRC18</i>   | chr7  | Body    | 0.77 | (0.56; 1.08) | 1.3E-01 |
| cg26489427 | <i>NRXN1</i>    | chr2  | Body    | 0.74 | (0.5; 1.09)  | 1.3E-01 |
| cg13386839 | <i>TNFRSF1B</i> | chr1  | Body    | 0.74 | (0.5; 1.09)  | 1.3E-01 |
| cg08036772 | <i>CTNND2</i>   | chr5  | Body    | 1.33 | (0.92; 1.92) | 1.3E-01 |
| cg02073051 | <i>PTPRN2</i>   | chr7  | Body    | 1.34 | (0.92; 1.94) | 1.3E-01 |
| cg20095674 | <i>UNC80</i>    | chr2  | Body    | 0.75 | (0.52; 1.09) | 1.3E-01 |
| cg14519294 | <i>CHFR</i>     | chr12 | TSS1500 | 1.38 | (0.91; 2.09) | 1.3E-01 |
| cg14941895 | <i>ZBTB20</i>   | chr3  | 5'UTR   | 0.73 | (0.49; 1.09) | 1.3E-01 |
| cg14941895 | <i>ZBTB20</i>   | chr3  | Body    | 0.73 | (0.49; 1.09) | 1.3E-01 |
| cg14069736 | <i>RTN4R</i>    | chr22 | 5'UTR   | 1.3  | (0.93; 1.82) | 1.3E-01 |
| cg14069736 | <i>RTN4R</i>    | chr22 | 1stExon | 1.3  | (0.93; 1.82) | 1.3E-01 |
| cg15202874 | <i>TENM2</i>    | chr5  | Body    | 0.66 | (0.38; 1.13) | 1.3E-01 |
| cg23325999 | <i>PTPRS</i>    | chr19 | Body    | 1.38 | (0.91; 2.1)  | 1.3E-01 |
| cg00841760 | <i>PTPRN2</i>   | chr7  | Body    | 1.28 | (0.93; 1.76) | 1.3E-01 |
| cg09941017 | <i>PTPRN2</i>   | chr7  | Body    | 0.75 | (0.52; 1.09) | 1.3E-01 |
| cg01151821 | <i>FBXO32</i>   | chr8  | TSS1500 | 1.32 | (0.92; 1.88) | 1.3E-01 |
| cg17899806 | <i>RAP1B</i>    | chr12 | 5'UTR   | 0.75 | (0.52; 1.09) | 1.3E-01 |
| cg07073096 | <i>GNA12</i>    | chr7  | Body    | 1.33 | (0.92; 1.93) | 1.3E-01 |
| cg23987244 | <i>PEX14</i>    | chr1  | Body    | 0.75 | (0.51; 1.09) | 1.3E-01 |
| cg03180980 | <i>CPEB1</i>    | chr15 | Body    | 1.34 | (0.92; 1.97) | 1.3E-01 |
| cg03180980 | <i>CPEB1</i>    | chr15 | TSS200  | 1.34 | (0.92; 1.97) | 1.3E-01 |
| cg23548616 | <i>CNTNAP2</i>  | chr7  | Body    | 0.67 | (0.4; 1.12)  | 1.3E-01 |
| cg16189113 | <i>CDH13</i>    | chr16 | Body    | 0.77 | (0.54; 1.08) | 1.3E-01 |
| cg03669936 | <i>FBXO11</i>   | chr2  | ExonBnd | 0.77 | (0.54; 1.08) | 1.3E-01 |
| cg03669936 | <i>FBXO11</i>   | chr2  | Body    | 0.77 | (0.54; 1.08) | 1.3E-01 |
| cg10427027 | <i>PTPRN2</i>   | chr7  | Body    | 0.72 | (0.47; 1.1)  | 1.3E-01 |
| cg17139864 | <i>COL5A2</i>   | chr2  | Body    | 1.32 | (0.92; 1.88) | 1.3E-01 |
| cg16671446 | <i>CSMD2</i>    | chr1  | ExonBnd | 1.31 | (0.92; 1.86) | 1.3E-01 |
| cg16671446 | <i>CSMD2</i>    | chr1  | Body    | 1.31 | (0.92; 1.86) | 1.3E-01 |
| cg13939602 | <i>CACNA1C</i>  | chr12 | Body    | 0.68 | (0.41; 1.12) | 1.3E-01 |
| cg14178822 | <i>SRSF10</i>   | chr1  | Body    | 1.39 | (0.91; 2.14) | 1.3E-01 |
| cg23539966 | <i>RTN4</i>     | chr2  | TSS1500 | 0.78 | (0.57; 1.08) | 1.3E-01 |
| cg23539966 | <i>RTN4</i>     | chr2  | 1stExon | 0.78 | (0.57; 1.08) | 1.3E-01 |
| cg23539966 | <i>RTN4</i>     | chr2  | 5'UTR   | 0.78 | (0.57; 1.08) | 1.3E-01 |
| cg21043886 | <i>NOL4L</i>    | chr20 | Body    | 0.78 | (0.56; 1.08) | 1.3E-01 |
| cg15792338 | <i>TSHZ3</i>    | chr19 | TSS1500 | 1.65 | (0.86; 3.16) | 1.3E-01 |
| cg25943372 | <i>BRUNOL4</i>  | chr18 | Body    | 0.71 | (0.46; 1.1)  | 1.3E-01 |
| cg24120297 | <i>DACH1</i>    | chr13 | Body    | 0.78 | (0.57; 1.08) | 1.3E-01 |
| cg00414136 | <i>SUGCT</i>    | chr7  | Body    | 1.3  | (0.93; 1.81) | 1.3E-01 |
| cg08141629 | <i>AKAP13</i>   | chr15 | Body    | 0.76 | (0.54; 1.08) | 1.3E-01 |
| cg05160295 | <i>CTDSP2</i>   | chr12 | Body    | 1.35 | (0.91; 1.99) | 1.3E-01 |
| cg02641990 | <i>SGIP1</i>    | chr1  | 5'UTR   | 0.61 | (0.32; 1.16) | 1.3E-01 |
| cg02641990 | <i>SGIP1</i>    | chr1  | 1stExon | 0.61 | (0.32; 1.16) | 1.3E-01 |
| cg05706373 | <i>PDE8A</i>    | chr15 | Body    | 1.3  | (0.92; 1.83) | 1.3E-01 |
| cg23069036 | <i>FBXO33</i>   | chr14 | TSS1500 | 0.78 | (0.57; 1.07) | 1.3E-01 |
| cg26085328 | <i>PTPRN2</i>   | chr7  | Body    | 1.3  | (0.92; 1.83) | 1.3E-01 |
| cg23058673 | <i>TNRC18</i>   | chr7  | Body    | 1.39 | (0.91; 2.14) | 1.3E-01 |
| cg12176612 | <i>TAOK3</i>    | chr12 | 5'UTR   | 1.33 | (0.92; 1.94) | 1.3E-01 |
| cg01273679 | <i>BRUNOL4</i>  | chr18 | TSS1500 | 1.28 | (0.93; 1.77) | 1.3E-01 |
| cg25706530 | <i>NOL4</i>     | chr18 | Body    | 1.54 | (0.88; 2.69) | 1.3E-01 |
| cg25706530 | <i>NOL4</i>     | chr18 | TSS200  | 1.54 | (0.88; 2.69) | 1.3E-01 |
| cg15559898 | <i>MTNR1B</i>   | chr11 | Body    | 1.34 | (0.92; 1.96) | 1.3E-01 |
| cg22071344 | <i>FBXO11</i>   | chr2  | TSS200  | 0.79 | (0.58; 1.07) | 1.3E-01 |
| cg16902746 | <i>PTPRS</i>    | chr19 | 5'UTR   | 1.31 | (0.92; 1.87) | 1.3E-01 |
| cg23604194 | <i>ZBTB20</i>   | chr3  | TSS1500 | 0.78 | (0.56; 1.08) | 1.3E-01 |
| cg23604194 | <i>ZBTB20</i>   | chr3  | Body    | 0.78 | (0.56; 1.08) | 1.3E-01 |
| cg23604194 | <i>ZBTB20</i>   | chr3  | 5'UTR   | 0.78 | (0.56; 1.08) | 1.3E-01 |
| cg04977618 | <i>CDH11</i>    | chr16 | 5'UTR   | 0.75 | (0.51; 1.09) | 1.3E-01 |
| cg25522880 | <i>TDRP</i>     | chr8  | Body    | 0.77 | (0.54; 1.08) | 1.3E-01 |
| cg00626749 | <i>CCDC80</i>   | chr3  | Body    | 1.29 | (0.93; 1.78) | 1.3E-01 |



|            |                  |       |         |      |              |         |
|------------|------------------|-------|---------|------|--------------|---------|
| cg15694520 | <i>ATF7IP</i>    | chr12 | Body    | 0.75 | (0.52; 1.09) | 1.3E-01 |
| cg19686543 | <i>CNTNAP2</i>   | chr7  | Body    | 0.71 | (0.45; 1.11) | 1.3E-01 |
| cg25901559 | <i>PTPRN2</i>    | chr7  | Body    | 1.33 | (0.92; 1.92) | 1.3E-01 |
| cg18239337 | <i>ALCAM</i>     | chr3  | TSS200  | 0.79 | (0.59; 1.07) | 1.3E-01 |
| cg25821143 | <i>PTPRN2</i>    | chr7  | Body    | 0.81 | (0.61; 1.07) | 1.3E-01 |
| cg19767969 | <i>CPEB1</i>     | chr15 | TSS200  | 0.78 | (0.57; 1.08) | 1.3E-01 |
| cg19767969 | <i>CPEB1</i>     | chr15 | TSS1500 | 0.78 | (0.57; 1.08) | 1.3E-01 |
| cg19708124 | <i>NOL4L</i>     | chr20 | Body    | 1.3  | (0.92; 1.82) | 1.3E-01 |
| cg04591012 | <i>UBE2E2</i>    | chr3  | Body    | 0.76 | (0.53; 1.09) | 1.3E-01 |
| cg08538538 | <i>SUGCT</i>     | chr7  | Body    | 0.71 | (0.45; 1.11) | 1.3E-01 |
| cg21534788 | <i>PEX14</i>     | chr1  | Body    | 0.78 | (0.57; 1.08) | 1.3E-01 |
| cg16829834 | <i>CSMD2</i>     | chr1  | Body    | 1.71 | (0.85; 3.46) | 1.3E-01 |
| cg00102711 | <i>CSMD2</i>     | chr1  | Body    | 0.74 | (0.5; 1.1)   | 1.3E-01 |
| cg02007867 | <i>PTPRN2</i>    | chr7  | Body    | 0.78 | (0.57; 1.08) | 1.3E-01 |
| cg13736939 | <i>PTPRN2</i>    | chr7  | Body    | 0.53 | (0.23; 1.21) | 1.3E-01 |
| cg06757951 | <i>WVOX</i>      | chr16 | Body    | 0.78 | (0.56; 1.08) | 1.3E-01 |
| cg08514594 | <i>PTPRN2</i>    | chr7  | Body    | 0.76 | (0.53; 1.09) | 1.3E-01 |
| cg17408686 | <i>CHCHD6</i>    | chr3  | TSS1500 | 1.3  | (0.92; 1.82) | 1.3E-01 |
| cg15436936 | <i>SCAF8</i>     | chr6  | Body    | 1.34 | (0.91; 1.97) | 1.3E-01 |
| cg27188079 | <i>RNU5E-1</i>   | chr5  | Body    | 1.38 | (0.91; 2.1)  | 1.3E-01 |
| cg22005389 | <i>PHACTR1</i>   | chr6  | Body    | 0.79 | (0.57; 1.08) | 1.3E-01 |
| cg01468539 | <i>ATF7</i>      | chr12 | 5'UTR   | 0.78 | (0.57; 1.08) | 1.3E-01 |
| cg01468539 | <i>ATF7</i>      | chr12 | TSS200  | 0.78 | (0.57; 1.08) | 1.3E-01 |
| cg01468539 | <i>ATF7</i>      | chr12 | Body    | 0.78 | (0.57; 1.08) | 1.3E-01 |
| cg21151057 | <i>PTPRN2</i>    | chr7  | Body    | 0.75 | (0.51; 1.09) | 1.3E-01 |
| cg02794920 | <i>UBE2E2</i>    | chr3  | TSS1500 | 0.77 | (0.55; 1.08) | 1.3E-01 |
| cg10563213 | <i>TENM2</i>     | chr5  | Body    | 1.37 | (0.91; 2.07) | 1.3E-01 |
| cg09657673 | <i>TNRC6A</i>    | chr16 | Body    | 1.28 | (0.93; 1.77) | 1.3E-01 |
| cg12105873 | <i>MEIS2</i>     | chr15 | Body    | 1.37 | (0.91; 2.07) | 1.3E-01 |
| cg07888234 | <i>TNFRSF11A</i> | chr18 | TSS1500 | 1.36 | (0.91; 2.04) | 1.3E-01 |
| cg25309588 | <i>ATP8A1</i>    | chr4  | TSS1500 | 0.73 | (0.48; 1.1)  | 1.3E-01 |
| cg08111661 | <i>CACNA1C</i>   | chr12 | Body    | 0.69 | (0.42; 1.12) | 1.3E-01 |
| cg09880724 | <i>FBXO31</i>    | chr16 | Body    | 1.32 | (0.92; 1.91) | 1.3E-01 |
| cg01053405 | <i>TNRC6A</i>    | chr16 | Body    | 1.38 | (0.91; 2.1)  | 1.3E-01 |
| cg24422198 | <i>TNFRSF11A</i> | chr18 | TSS200  | 1.33 | (0.92; 1.93) | 1.4E-01 |
| cg16560077 | <i>CREBBP</i>    | chr16 | Body    | 1.31 | (0.92; 1.87) | 1.4E-01 |
| cg09452312 | <i>WVOX</i>      | chr16 | Body    | 1.47 | (0.89; 2.42) | 1.4E-01 |
| cg17360832 | <i>PTPRN2</i>    | chr7  | Body    | 0.77 | (0.55; 1.08) | 1.4E-01 |
| cg03142258 | <i>CDH13</i>     | chr16 | Body    | 1.34 | (0.91; 1.96) | 1.4E-01 |
| cg10495227 | <i>CDH13</i>     | chr16 | Body    | 0.77 | (0.55; 1.08) | 1.4E-01 |
| cg07545903 | <i>PTPRN2</i>    | chr7  | Body    | 0.79 | (0.58; 1.08) | 1.4E-01 |
| cg05921232 | <i>CNTF</i>      | chr11 | TSS200  | 0.76 | (0.52; 1.09) | 1.4E-01 |
| cg26046284 | <i>TENM2</i>     | chr5  | Body    | 0.81 | (0.61; 1.07) | 1.4E-01 |
| cg15819136 | <i>TAOK3</i>     | chr12 | Body    | 1.29 | (0.92; 1.79) | 1.4E-01 |
| cg00093930 | <i>PTPRU</i>     | chr1  | Body    | 1.31 | (0.92; 1.88) | 1.4E-01 |
| cg25352747 | <i>ATF7</i>      | chr12 | Body    | 1.57 | (0.87; 2.83) | 1.4E-01 |
| cg04933438 | <i>WVOX</i>      | chr16 | Body    | 1.28 | (0.92; 1.77) | 1.4E-01 |
| cg08993957 | <i>TNRC6B</i>    | chr22 | 5'UTR   | 1.29 | (0.92; 1.81) | 1.4E-01 |
| cg20648350 | <i>TNRC6B</i>    | chr22 | 3'UTR   | 1.46 | (0.89; 2.4)  | 1.4E-01 |
| cg10011537 | <i>PTPRN2</i>    | chr7  | Body    | 0.75 | (0.51; 1.1)  | 1.4E-01 |
| cg26107538 | <i>CNTNAP2</i>   | chr7  | Body    | 1.32 | (0.92; 1.9)  | 1.4E-01 |
| cg25207738 | <i>DNAI2</i>     | chr17 | Body    | 0.75 | (0.52; 1.09) | 1.4E-01 |
| cg27090216 | <i>TNFRSF10C</i> | chr8  | 5'UTR   | 0.75 | (0.52; 1.09) | 1.4E-01 |
| cg27090216 | <i>TNFRSF10C</i> | chr8  | 1stExon | 0.75 | (0.52; 1.09) | 1.4E-01 |
| cg14099285 | <i>NRXN1</i>     | chr2  | Body    | 1.32 | (0.92; 1.91) | 1.4E-01 |
| cg08418872 | <i>TNFRSF1A</i>  | chr12 | Body    | 0.67 | (0.39; 1.14) | 1.4E-01 |
| cg23287229 | <i>FBXO32</i>    | chr8  | Body    | 0.78 | (0.56; 1.08) | 1.4E-01 |
| cg25814236 | <i>TENM2</i>     | chr5  | Body    | 1.35 | (0.91; 1.99) | 1.4E-01 |
| cg01014190 | <i>NRXN1</i>     | chr2  | Body    | 0.7  | (0.44; 1.12) | 1.4E-01 |
| cg14708628 | <i>TNR</i>       | chr1  | TSS1500 | 0.77 | (0.55; 1.09) | 1.4E-01 |
| cg14508021 | <i>AKAP13</i>    | chr15 | 5'UTR   | 1.47 | (0.89; 2.43) | 1.4E-01 |



|            |                  |       |         |      |              |         |
|------------|------------------|-------|---------|------|--------------|---------|
| cg02972093 | <i>PTPRU</i>     | chr1  | Body    | 0.77 | (0.55; 1.09) | 1.4E-01 |
| cg11201273 | <i>DDHD2</i>     | chr8  | TSS1500 | 1.29 | (0.92; 1.81) | 1.4E-01 |
| cg11201273 | <i>DDHD2</i>     | chr8  | TSS200  | 1.29 | (0.92; 1.81) | 1.4E-01 |
| cg00512563 | <i>FBXO31</i>    | chr16 | Body    | 1.28 | (0.92; 1.78) | 1.4E-01 |
| cg23914388 | <i>RTN4RL1</i>   | chr17 | TSS1500 | 1.57 | (0.87; 2.83) | 1.4E-01 |
| cg04299135 | <i>BARX2</i>     | chr11 | TSS1500 | 0.78 | (0.56; 1.08) | 1.4E-01 |
| cg27649764 | <i>CTDSPL2</i>   | chr15 | TSS1500 | 1.3  | (0.92; 1.84) | 1.4E-01 |
| cg03097745 | <i>TDRP</i>      | chr8  | Body    | 1.29 | (0.92; 1.8)  | 1.4E-01 |
| cg12247403 | <i>PTPRS</i>     | chr19 | 5'UTR   | 1.26 | (0.93; 1.72) | 1.4E-01 |
| cg20505332 | <i>UBE2E2</i>    | chr3  | Body    | 0.77 | (0.54; 1.09) | 1.4E-01 |
| cg01372107 | <i>PTPRN2</i>    | chr7  | Body    | 0.78 | (0.55; 1.09) | 1.4E-01 |
| cg00541104 | <i>PTPRN2</i>    | chr7  | Body    | 1.28 | (0.92; 1.77) | 1.4E-01 |
| cg02724025 | <i>CDH11</i>     | chr16 | Body    | 0.77 | (0.55; 1.09) | 1.4E-01 |
| cg06234781 | <i>CREBBP</i>    | chr16 | Body    | 1.4  | (0.9; 2.18)  | 1.4E-01 |
| cg08763924 | <i>PTPRN2</i>    | chr7  | Body    | 1.27 | (0.93; 1.74) | 1.4E-01 |
| cg15090337 | <i>NOL4L</i>     | chr20 | Body    | 1.32 | (0.91; 1.92) | 1.4E-01 |
| cg26758826 | <i>TENM2</i>     | chr5  | Body    | 1.44 | (0.89; 2.35) | 1.4E-01 |
| cg05791779 | <i>CHCHD6</i>    | chr3  | Body    | 0.75 | (0.51; 1.1)  | 1.4E-01 |
| cg15363349 | <i>TNFRSF11A</i> | chr18 | TSS200  | 1.27 | (0.93; 1.74) | 1.4E-01 |
| cg12072376 | <i>TNRC6C</i>    | chr17 | 5'UTR   | 0.77 | (0.55; 1.09) | 1.4E-01 |
| cg18273464 | <i>TNRC18</i>    | chr7  | Body    | 1.3  | (0.92; 1.85) | 1.4E-01 |
| cg09930565 | <i>CTNND2</i>    | chr5  | Body    | 1.32 | (0.91; 1.91) | 1.4E-01 |
| cg05913555 | <i>PTPRN2</i>    | chr7  | Body    | 0.77 | (0.55; 1.09) | 1.4E-01 |
| cg05554406 | <i>GNA12</i>     | chr7  | Body    | 1.25 | (0.93; 1.67) | 1.4E-01 |
| cg21316960 | <i>ZBTB20</i>    | chr3  | Body    | 1.34 | (0.91; 1.99) | 1.4E-01 |
| cg21316960 | <i>ZBTB20</i>    | chr3  | 5'UTR   | 1.34 | (0.91; 1.99) | 1.4E-01 |
| cg03383553 | <i>TNRC18</i>    | chr7  | Body    | 1.26 | (0.93; 1.71) | 1.4E-01 |
| cg23618588 | <i>PTPRN2</i>    | chr7  | Body    | 0.67 | (0.39; 1.14) | 1.4E-01 |
| cg16971599 | <i>TNFRSF1A</i>  | chr12 | 3'UTR   | 1.27 | (0.92; 1.74) | 1.4E-01 |
| cg18424101 | <i>PTPRN2</i>    | chr7  | Body    | 1.28 | (0.92; 1.78) | 1.4E-01 |
| cg20717798 | <i>PTPRN2</i>    | chr7  | Body    | 0.8  | (0.6; 1.08)  | 1.4E-01 |
| cg24637276 | <i>TNFRSF10B</i> | chr8  | Body    | 1.32 | (0.91; 1.9)  | 1.4E-01 |
| cg26847810 | <i>TNRC18</i>    | chr7  | Body    | 0.68 | (0.41; 1.14) | 1.4E-01 |
| cg08707253 | <i>ATF7</i>      | chr12 | Body    | 1.3  | (0.92; 1.83) | 1.4E-01 |
| cg10364362 | <i>WWOX</i>      | chr16 | Body    | 0.74 | (0.5; 1.1)   | 1.4E-01 |
| cg11900120 | <i>PTPRN2</i>    | chr7  | Body    | 1.35 | (0.91; 2.01) | 1.4E-01 |
| cg17279942 | <i>CUX2</i>      | chr12 | Body    | 1.31 | (0.91; 1.87) | 1.4E-01 |
| cg04303033 | <i>PTPRN2</i>    | chr7  | Body    | 1.36 | (0.9; 2.04)  | 1.4E-01 |
| cg11747820 | <i>PTPRU</i>     | chr1  | Body    | 0.76 | (0.52; 1.1)  | 1.4E-01 |
| cg07077705 | <i>CREBBP</i>    | chr16 | Body    | 0.79 | (0.58; 1.08) | 1.4E-01 |
| cg09416903 | <i>SUSD4</i>     | chr1  | Body    | 1.37 | (0.9; 2.1)   | 1.4E-01 |
| cg01637551 | <i>CACNA1C</i>   | chr12 | TSS1500 | 1.33 | (0.91; 1.95) | 1.4E-01 |
| cg16517753 | <i>TNR</i>       | chr1  | 3'UTR   | 1.41 | (0.89; 2.23) | 1.4E-01 |
| cg27073206 | <i>NOL4L</i>     | chr20 | Body    | 1.26 | (0.93; 1.71) | 1.4E-01 |
| cg03824573 | <i>CACNA1C</i>   | chr12 | Body    | 1.28 | (0.92; 1.78) | 1.4E-01 |
| cg13816552 | <i>PTPRN2</i>    | chr7  | Body    | 1.26 | (0.93; 1.71) | 1.4E-01 |
| cg22750483 | <i>TNFRSF11B</i> | chr8  | 5'UTR   | 0.77 | (0.55; 1.09) | 1.4E-01 |
| cg22750483 | <i>TNFRSF11B</i> | chr8  | 1stExon | 0.77 | (0.55; 1.09) | 1.4E-01 |
| cg23989770 | <i>ATP8A1</i>    | chr4  | Body    | 0.79 | (0.57; 1.09) | 1.4E-01 |
| cg25497530 | <i>PTPRN2</i>    | chr7  | Body    | 0.78 | (0.57; 1.09) | 1.4E-01 |
| cg18753811 | <i>CACNA1C</i>   | chr12 | TSS200  | 0.77 | (0.54; 1.09) | 1.4E-01 |
| cg01405767 | <i>RECQL5</i>    | chr17 | Body    | 1.39 | (0.89; 2.15) | 1.4E-01 |
| cg24776343 | <i>TNFRSF19</i>  | chr13 | Body    | 0.77 | (0.54; 1.09) | 1.4E-01 |
| cg21984889 | <i>PTPRS</i>     | chr19 | 5'UTR   | 1.4  | (0.89; 2.21) | 1.4E-01 |
| cg03247739 | <i>CREBBP</i>    | chr16 | Body    | 1.38 | (0.9; 2.12)  | 1.4E-01 |
| cg15139644 | <i>BRUNOL4</i>   | chr18 | Body    | 0.75 | (0.51; 1.1)  | 1.4E-01 |
| cg07838035 | <i>SUSD4</i>     | chr1  | Body    | 0.6  | (0.3; 1.19)  | 1.4E-01 |
| cg03170878 | <i>PTPRN2</i>    | chr7  | Body    | 0.78 | (0.55; 1.09) | 1.4E-01 |
| cg05088120 | <i>PTPRN2</i>    | chr7  | Body    | 0.77 | (0.54; 1.1)  | 1.4E-01 |
| cg14306578 | <i>TNFRSF10B</i> | chr8  | Body    | 1.31 | (0.91; 1.9)  | 1.4E-01 |
| cg14306578 | <i>TNFRSF10B</i> | chr8  | ExonBnd | 1.31 | (0.91; 1.9)  | 1.4E-01 |



|                |           |       |         |      |              |         |
|----------------|-----------|-------|---------|------|--------------|---------|
| cg08310756     | WWOX      | chr16 | Body    | 1.37 | (0.9; 2.08)  | 1.4E-01 |
| cg11154070     | BRUNOL4   | chr18 | 1stExon | 0.74 | (0.5; 1.11)  | 1.4E-01 |
| cg11154070     | BRUNOL4   | chr18 | 5'UTR   | 0.74 | (0.5; 1.11)  | 1.4E-01 |
| cg16975584     | CNTNAP2   | chr7  | Body    | 0.77 | (0.55; 1.09) | 1.5E-01 |
| cg18257541     | UBE2E2    | chr3  | TSS1500 | 0.65 | (0.37; 1.16) | 1.5E-01 |
| cg22572820     | CHCHD6    | chr3  | Body    | 0.76 | (0.53; 1.1)  | 1.5E-01 |
| cg06508056     | CNTNAP2   | chr7  | Body    | 1.43 | (0.88; 2.33) | 1.5E-01 |
| cg11187662     | TNRC18    | chr7  | Body    | 0.8  | (0.59; 1.08) | 1.5E-01 |
| cg09484322     | ZBTB20    | chr3  | 5'UTR   | 0.76 | (0.52; 1.1)  | 1.5E-01 |
| cg05705615     | TNRC18    | chr7  | Body    | 1.29 | (0.91; 1.82) | 1.5E-01 |
| cg06934974     | PTPRN2    | chr7  | Body    | 1.28 | (0.92; 1.78) | 1.5E-01 |
| cg02838736     | PEX14     | chr1  | Body    | 0.78 | (0.56; 1.09) | 1.5E-01 |
| cg13347071     | UNC80     | chr2  | 5'UTR   | 0.69 | (0.42; 1.14) | 1.5E-01 |
| cg13347071     | UNC80     | chr2  | 1stExon | 0.69 | (0.42; 1.14) | 1.5E-01 |
| cg17293641     | TNFRSF11B | chr8  | 5'UTR   | 0.75 | (0.51; 1.1)  | 1.5E-01 |
| cg17293641     | TNFRSF11B | chr8  | 1stExon | 0.75 | (0.51; 1.1)  | 1.5E-01 |
| cg12350036     | CREBBP    | chr16 | Body    | 1.46 | (0.87; 2.45) | 1.5E-01 |
| cg26394233     | PTPRN2    | chr7  | Body    | 1.25 | (0.92; 1.7)  | 1.5E-01 |
| cg04396360     | PEX14     | chr1  | Body    | 1.25 | (0.93; 1.68) | 1.5E-01 |
| cg01435313     | CSMD2     | chr1  | Body    | 0.79 | (0.57; 1.09) | 1.5E-01 |
| cg24287125     | CACNA1C   | chr12 | Body    | 1.33 | (0.9; 1.96)  | 1.5E-01 |
| cg15784881     | CREBBP    | chr16 | Body    | 0.77 | (0.54; 1.1)  | 1.5E-01 |
| cg23202949     | FBXO32    | chr8  | Body    | 1.4  | (0.89; 2.19) | 1.5E-01 |
| cg20262857     | ZNF704    | chr8  | Body    | 0.58 | (0.27; 1.22) | 1.5E-01 |
| cg08143003     | ALCAM     | chr3  | 5'UTR   | 0.81 | (0.6; 1.08)  | 1.5E-01 |
| cg08143003     | ALCAM     | chr3  | 1stExon | 0.81 | (0.6; 1.08)  | 1.5E-01 |
| cg19446817     | CSMD2     | chr1  | Body    | 1.27 | (0.92; 1.76) | 1.5E-01 |
| cg20702204     | CHFR      | chr12 | Body    | 1.25 | (0.92; 1.69) | 1.5E-01 |
| cg19622597     | ZBTB20    | chr3  | Body    | 0.79 | (0.58; 1.09) | 1.5E-01 |
| cg12600749     | PTPRN2    | chr7  | Body    | 1.34 | (0.9; 2)     | 1.5E-01 |
| cg07783094     | PTPRN2    | chr7  | Body    | 1.27 | (0.92; 1.76) | 1.5E-01 |
| cg08123816     | PDE8A     | chr15 | Body    | 0.68 | (0.4; 1.15)  | 1.5E-01 |
| ch.16.1914550R | CDH13     | chr16 | Body    | 0.77 | (0.55; 1.1)  | 1.5E-01 |
| cg26410484     | CHFR      | chr12 | TSS1500 | 1.31 | (0.91; 1.91) | 1.5E-01 |
| cg16303353     | CACNA1C   | chr12 | Body    | 0.46 | (0.16; 1.33) | 1.5E-01 |
| cg19901889     | RAP1B     | chr12 | 5'UTR   | 0.77 | (0.54; 1.1)  | 1.5E-01 |
| cg19901889     | RAP1B     | chr12 | 1stExon | 0.77 | (0.54; 1.1)  | 1.5E-01 |
| cg23076878     | CACNA1C   | chr12 | Body    | 0.75 | (0.51; 1.11) | 1.5E-01 |
| cg17268775     | CHFR      | chr12 | Body    | 0.8  | (0.59; 1.09) | 1.5E-01 |
| cg14100977     | PTPRN2    | chr7  | Body    | 1.38 | (0.89; 2.13) | 1.5E-01 |
| cg24776427     | MEIS2     | chr15 | Body    | 0.76 | (0.53; 1.1)  | 1.5E-01 |
| cg04471888     | CACNA1C   | chr12 | Body    | 1.35 | (0.9; 2.03)  | 1.5E-01 |
| cg19853833     | BRUNOL4   | chr18 | TSS1500 | 0.74 | (0.49; 1.12) | 1.5E-01 |
| cg19981243     | ZBTB20    | chr3  | 5'UTR   | 1.31 | (0.91; 1.91) | 1.5E-01 |
| cg19981243     | ZBTB20    | chr3  | TSS200  | 1.31 | (0.91; 1.91) | 1.5E-01 |
| cg03945777     | PTPRN2    | chr7  | Body    | 1.29 | (0.91; 1.84) | 1.5E-01 |
| cg23801281     | TDRP      | chr8  | Body    | 1.28 | (0.91; 1.79) | 1.5E-01 |
| cg13686919     | PTPRS     | chr19 | 5'UTR   | 1.32 | (0.9; 1.91)  | 1.5E-01 |
| cg00703798     | DACH1     | chr13 | Body    | 0.73 | (0.48; 1.12) | 1.5E-01 |
| cg20571958     | TNR       | chr1  | 5'UTR   | 0.72 | (0.45; 1.13) | 1.5E-01 |
| cg11308991     | NOL4L     | chr20 | Body    | 0.79 | (0.58; 1.09) | 1.5E-01 |
| cg19731401     | GNA12     | chr7  | Body    | 0.76 | (0.52; 1.11) | 1.5E-01 |
| cg04733367     | WWOX      | chr16 | Body    | 1.26 | (0.92; 1.73) | 1.5E-01 |
| cg03317987     | SUSD4     | chr1  | Body    | 1.3  | (0.91; 1.86) | 1.5E-01 |
| cg11226403     | PTPRS     | chr19 | Body    | 1.32 | (0.9; 1.95)  | 1.5E-01 |
| cg07901851     | SMARCD3   | chr7  | TSS200  | 1.34 | (0.9; 2.02)  | 1.5E-01 |
| cg07901851     | SMARCD3   | chr7  | TSS1500 | 1.34 | (0.9; 2.02)  | 1.5E-01 |
| cg22232120     | WAC       | chr10 | TSS1500 | 0.76 | (0.52; 1.11) | 1.5E-01 |
| cg22232120     | WAC       | chr10 | 5'UTR   | 0.76 | (0.52; 1.11) | 1.5E-01 |
| cg26084603     | SUGCT     | chr7  | Body    | 0.76 | (0.53; 1.1)  | 1.5E-01 |
| cg09904539     | CPEB1     | chr15 | Body    | 1.42 | (0.88; 2.28) | 1.5E-01 |



|            |                |       |         |      |              |         |
|------------|----------------|-------|---------|------|--------------|---------|
| cg09904539 | <i>CPEB1</i>   | chr15 | 5'UTR   | 1.42 | (0.88; 2.28) | 1.5E-01 |
| cg09466348 | <i>NOL4L</i>   | chr20 | Body    | 0.72 | (0.45; 1.13) | 1.5E-01 |
| cg09466348 | <i>NOL4L</i>   | chr20 | 5'UTR   | 0.72 | (0.45; 1.13) | 1.5E-01 |
| cg27147846 | <i>WVOX</i>    | chr16 | Body    | 0.78 | (0.55; 1.1)  | 1.5E-01 |
| cg13982612 | <i>PTPRN2</i>  | chr7  | Body    | 0.78 | (0.55; 1.1)  | 1.5E-01 |
| cg02512806 | <i>CREBBP</i>  | chr16 | 3'UTR   | 1.34 | (0.9; 1.99)  | 1.5E-01 |
| cg00635075 | <i>AKAP13</i>  | chr15 | Body    | 1.32 | (0.9; 1.95)  | 1.5E-01 |
| cg21926033 | <i>PTPRN2</i>  | chr7  | Body    | 1.35 | (0.9; 2.02)  | 1.5E-01 |
| cg15961780 | <i>AKAP13</i>  | chr15 | Body    | 1.27 | (0.91; 1.77) | 1.5E-01 |
| cg14086078 | <i>ATF7IP</i>  | chr12 | Body    | 1.37 | (0.89; 2.11) | 1.5E-01 |
| cg14863485 | <i>NDUFA9</i>  | chr12 | Body    | 1.33 | (0.9; 1.96)  | 1.5E-01 |
| cg15684231 | <i>PTPRN2</i>  | chr7  | Body    | 0.7  | (0.42; 1.14) | 1.5E-01 |
| cg26238057 | <i>TENM2</i>   | chr5  | Body    | 0.76 | (0.52; 1.11) | 1.5E-01 |
| cg12761046 | <i>AKAP13</i>  | chr15 | Body    | 1.54 | (0.85; 2.77) | 1.5E-01 |
| cg27558095 | <i>SGIP1</i>   | chr1  | TSS1500 | 1.4  | (0.88; 2.23) | 1.5E-01 |
| cg04954894 | <i>DDHD2</i>   | chr8  | 5'UTR   | 0.77 | (0.54; 1.1)  | 1.5E-01 |
| cg18675899 | <i>TENM2</i>   | chr5  | Body    | 1.32 | (0.9; 1.94)  | 1.5E-01 |
| cg17080902 | <i>DMXL2</i>   | chr15 | Body    | 0.71 | (0.44; 1.14) | 1.5E-01 |
| cg12393104 | <i>RTN4R</i>   | chr22 | Body    | 1.36 | (0.89; 2.08) | 1.5E-01 |
| cg13331610 | <i>FSTL1</i>   | chr3  | Body    | 1.53 | (0.85; 2.76) | 1.5E-01 |
| cg03515663 | <i>PTPRN2</i>  | chr7  | Body    | 0.73 | (0.48; 1.12) | 1.5E-01 |
| cg12749729 | <i>ATF7IP</i>  | chr12 | 5'UTR   | 1.34 | (0.9; 2.01)  | 1.5E-01 |
| cg12749729 | <i>ATF7IP</i>  | chr12 | TSS1500 | 1.34 | (0.9; 2.01)  | 1.5E-01 |
| cg06722216 | <i>NOL4</i>    | chr18 | 1stExon | 1.4  | (0.88; 2.23) | 1.5E-01 |
| cg08165078 | <i>CACNA1C</i> | chr12 | Body    | 1.47 | (0.86; 2.51) | 1.5E-01 |
| cg05388548 | <i>PHACTR1</i> | chr6  | Body    | 1.28 | (0.91; 1.8)  | 1.5E-01 |
| cg00872170 | <i>PTPRN2</i>  | chr7  | Body    | 0.8  | (0.6; 1.09)  | 1.5E-01 |
| cg06098639 | <i>NDUFA9</i>  | chr12 | Body    | 1.31 | (0.9; 1.89)  | 1.5E-01 |
| cg10626803 | <i>PTPRN2</i>  | chr7  | Body    | 1.27 | (0.91; 1.78) | 1.5E-01 |
| cg23932711 | <i>PTPRN2</i>  | chr7  | Body    | 0.81 | (0.61; 1.08) | 1.5E-01 |
| cg07256199 | <i>POU2F1</i>  | chr1  | Body    | 1.37 | (0.89; 2.1)  | 1.5E-01 |
| cg00931972 | <i>WVOX</i>    | chr16 | Body    | 0.81 | (0.6; 1.09)  | 1.5E-01 |
| cg07402808 | <i>PTPRN2</i>  | chr7  | Body    | 1.29 | (0.91; 1.84) | 1.6E-01 |
| cg00997976 | <i>FSTL1</i>   | chr3  | 5'UTR   | 0.8  | (0.59; 1.09) | 1.6E-01 |
| cg00997976 | <i>FSTL1</i>   | chr3  | 1stExon | 0.8  | (0.59; 1.09) | 1.6E-01 |
| cg02150961 | <i>TAOK3</i>   | chr12 | Body    | 1.25 | (0.92; 1.71) | 1.6E-01 |
| cg17084390 | <i>ATP8A1</i>  | chr4  | Body    | 1.32 | (0.9; 1.93)  | 1.6E-01 |
| cg16232391 | <i>SUGCT</i>   | chr7  | Body    | 1.29 | (0.91; 1.84) | 1.6E-01 |
| cg27445072 | <i>CDH13</i>   | chr16 | Body    | 0.79 | (0.56; 1.1)  | 1.6E-01 |
| cg01936090 | <i>CEP350</i>  | chr1  | TSS200  | 0.79 | (0.57; 1.09) | 1.6E-01 |
| cg01608683 | <i>NOL4L</i>   | chr20 | Body    | 2.04 | (0.76; 5.48) | 1.6E-01 |
| cg05490423 | <i>WVOX</i>    | chr16 | Body    | 0.8  | (0.58; 1.09) | 1.6E-01 |
| cg00294419 | <i>UBE2E2</i>  | chr3  | TSS200  | 0.75 | (0.5; 1.12)  | 1.6E-01 |
| cg13181950 | <i>CTNND2</i>  | chr5  | Body    | 1.26 | (0.91; 1.75) | 1.6E-01 |
| cg13181950 | <i>CTNND2</i>  | chr5  | 5'UTR   | 1.26 | (0.91; 1.75) | 1.6E-01 |
| cg08893585 | <i>BARX2</i>   | chr11 | TSS1500 | 0.79 | (0.57; 1.09) | 1.6E-01 |
| cg18542613 | <i>DACH1</i>   | chr13 | Body    | 0.73 | (0.47; 1.13) | 1.6E-01 |
| cg12510614 | <i>PTPRN2</i>  | chr7  | Body    | 1.25 | (0.92; 1.69) | 1.6E-01 |
| cg08884588 | <i>CSMD2</i>   | chr1  | Body    | 0.69 | (0.41; 1.16) | 1.6E-01 |
| cg15440158 | <i>CNTNAP2</i> | chr7  | Body    | 1.36 | (0.89; 2.08) | 1.6E-01 |
| cg09943550 | <i>CHFR</i>    | chr12 | Body    | 0.79 | (0.57; 1.09) | 1.6E-01 |
| cg03301404 | <i>PTPRN2</i>  | chr7  | Body    | 0.79 | (0.57; 1.09) | 1.6E-01 |
| cg07803501 | <i>AKAP13</i>  | chr15 | Body    | 0.78 | (0.56; 1.1)  | 1.6E-01 |
| cg07803501 | <i>AKAP13</i>  | chr15 | TSS1500 | 0.78 | (0.56; 1.1)  | 1.6E-01 |
| cg01350636 | <i>PHACTR1</i> | chr6  | Body    | 1.28 | (0.91; 1.79) | 1.6E-01 |
| cg09120938 | <i>CHFR</i>    | chr12 | Body    | 1.39 | (0.88; 2.18) | 1.6E-01 |
| cg11626857 | <i>ZNF704</i>  | chr8  | Body    | 0.74 | (0.49; 1.12) | 1.6E-01 |
| cg26137350 | <i>COL5A2</i>  | chr2  | Body    | 1.28 | (0.91; 1.81) | 1.6E-01 |
| cg19852147 | <i>WVOX</i>    | chr16 | Body    | 0.73 | (0.48; 1.13) | 1.6E-01 |
| cg13442689 | <i>PTPRN2</i>  | chr7  | Body    | 1.26 | (0.92; 1.72) | 1.6E-01 |
| cg12744979 | <i>WVOX</i>    | chr16 | Body    | 0.64 | (0.34; 1.19) | 1.6E-01 |



|            |                |       |         |      |              |         |
|------------|----------------|-------|---------|------|--------------|---------|
| cg24977670 | <i>CTNND2</i>  | chr5  | Body    | 1.34 | (0.89; 2)    | 1.6E-01 |
| cg11199770 | <i>TSHZ3</i>   | chr19 | TSS1500 | 1.32 | (0.9; 1.93)  | 1.6E-01 |
| cg10122553 | <i>RTN4RL2</i> | chr11 | TSS200  | 1.26 | (0.91; 1.75) | 1.6E-01 |
| cg19568022 | <i>AKAP13</i>  | chr15 | Body    | 0.77 | (0.53; 1.11) | 1.6E-01 |
| cg19568022 | <i>AKAP13</i>  | chr15 | TSS200  | 0.77 | (0.53; 1.11) | 1.6E-01 |
| cg16733654 | <i>PTPRS</i>   | chr19 | 5'UTR   | 0.77 | (0.54; 1.1)  | 1.6E-01 |
| cg14962548 | <i>TXNDC9</i>  | chr2  | 1stExon | 1.25 | (0.92; 1.69) | 1.6E-01 |
| cg14962548 | <i>TXNDC9</i>  | chr2  | 5'UTR   | 1.25 | (0.92; 1.69) | 1.6E-01 |
| cg01394138 | <i>RECQL5</i>  | chr17 | TSS1500 | 1.22 | (0.92; 1.62) | 1.6E-01 |
| cg19885224 | <i>FBXO34</i>  | chr14 | 5'UTR   | 1.36 | (0.89; 2.09) | 1.6E-01 |
| cg14251555 | <i>RECQL5</i>  | chr17 | TSS200  | 0.79 | (0.57; 1.1)  | 1.6E-01 |
| cg12430757 | <i>CCDC80</i>  | chr3  | Body    | 1.35 | (0.89; 2.06) | 1.6E-01 |
| cg25277638 | <i>PTPRN2</i>  | chr7  | Body    | 0.78 | (0.54; 1.1)  | 1.6E-01 |
| cg06761921 | <i>BRUNOL4</i> | chr18 | 1stExon | 1.29 | (0.91; 1.83) | 1.6E-01 |
| cg18134619 | <i>ALCAM</i>   | chr3  | Body    | 1.35 | (0.89; 2.05) | 1.6E-01 |
| cg21163617 | <i>PTPRN2</i>  | chr7  | Body    | 1.29 | (0.91; 1.84) | 1.6E-01 |
| cg16660359 | <i>CREBBP</i>  | chr16 | Body    | 1.28 | (0.91; 1.8)  | 1.6E-01 |
| cg25902202 | <i>CUX2</i>    | chr12 | Body    | 0.77 | (0.54; 1.11) | 1.6E-01 |
| cg21723994 | <i>ELAVL4</i>  | chr1  | Body    | 1.32 | (0.9; 1.93)  | 1.6E-01 |
| cg10175712 | <i>UNC80</i>   | chr2  | Body    | 1.32 | (0.9; 1.94)  | 1.6E-01 |
| cg15959113 | <i>TENM2</i>   | chr5  | Body    | 0.79 | (0.57; 1.1)  | 1.6E-01 |
| cg01115565 | <i>PTPRU</i>   | chr1  | Body    | 0.78 | (0.56; 1.1)  | 1.6E-01 |
| cg12948116 | <i>ATF7IP</i>  | chr12 | 5'UTR   | 0.77 | (0.53; 1.11) | 1.6E-01 |
| cg08799766 | <i>GNA12</i>   | chr7  | Body    | 1.26 | (0.91; 1.73) | 1.6E-01 |
| cg03338924 | <i>PHACTR1</i> | chr6  | Body    | 1.32 | (0.9; 1.94)  | 1.6E-01 |
| cg14905261 | <i>TDRP</i>    | chr8  | TSS1500 | 0.8  | (0.58; 1.09) | 1.6E-01 |
| cg14905261 | <i>TDRP</i>    | chr8  | 5'UTR   | 0.8  | (0.58; 1.09) | 1.6E-01 |
| cg04733649 | <i>ERI3</i>    | chr1  | Body    | 1.25 | (0.92; 1.71) | 1.6E-01 |
| cg17495501 | <i>CHD6</i>    | chr20 | Body    | 0.78 | (0.56; 1.1)  | 1.6E-01 |
| cg22578966 | <i>PTPRN2</i>  | chr7  | Body    | 1.27 | (0.91; 1.77) | 1.6E-01 |
| cg24743283 | <i>GNA12</i>   | chr7  | TSS1500 | 1.27 | (0.91; 1.77) | 1.6E-01 |
| cg17582545 | <i>PTPRN2</i>  | chr7  | Body    | 1.24 | (0.92; 1.67) | 1.6E-01 |
| cg03660162 | <i>WVOX</i>    | chr16 | Body    | 1.23 | (0.92; 1.64) | 1.6E-01 |
| cg21231189 | <i>PTPRN2</i>  | chr7  | Body    | 1.25 | (0.92; 1.71) | 1.6E-01 |
| cg03319337 | <i>CTNND2</i>  | chr5  | Body    | 1.25 | (0.92; 1.71) | 1.6E-01 |
| cg01690390 | <i>NRXN1</i>   | chr2  | Body    | 1.26 | (0.91; 1.75) | 1.6E-01 |
| cg04071758 | <i>CREBBP</i>  | chr16 | 3'UTR   | 0.77 | (0.54; 1.11) | 1.6E-01 |
| cg05119810 | <i>CHFR</i>    | chr12 | Body    | 1.25 | (0.91; 1.72) | 1.6E-01 |
| cg19398794 | <i>MEX3A</i>   | chr1  | 1stExon | 0.81 | (0.6; 1.09)  | 1.6E-01 |
| cg03802982 | <i>CDH11</i>   | chr16 | 5'UTR   | 0.78 | (0.55; 1.1)  | 1.6E-01 |
| cg06017944 | <i>MEIS2</i>   | chr15 | Body    | 0.76 | (0.52; 1.12) | 1.6E-01 |
| cg21755457 | <i>ATF7</i>    | chr12 | TSS200  | 0.8  | (0.58; 1.09) | 1.6E-01 |
| cg02304201 | <i>ATP6V0C</i> | chr16 | Body    | 0.82 | (0.61; 1.08) | 1.6E-01 |
| cg18048949 | <i>CHD6</i>    | chr20 | 5'UTR   | 0.81 | (0.61; 1.09) | 1.6E-01 |
| cg18048949 | <i>CHD6</i>    | chr20 | 1stExon | 0.81 | (0.61; 1.09) | 1.6E-01 |
| cg23419050 | <i>NOL4</i>    | chr18 | Body    | 0.78 | (0.55; 1.1)  | 1.6E-01 |
| cg23419050 | <i>NOL4</i>    | chr18 | TSS200  | 0.78 | (0.55; 1.1)  | 1.6E-01 |
| cg20827128 | <i>PHACTR1</i> | chr6  | Body    | 0.8  | (0.58; 1.09) | 1.6E-01 |
| cg01776825 | <i>CPEB1</i>   | chr15 | Body    | 1.27 | (0.91; 1.79) | 1.6E-01 |
| cg07959864 | <i>PTPRN2</i>  | chr7  | Body    | 0.77 | (0.53; 1.11) | 1.6E-01 |
| cg27124598 | <i>SMARCD3</i> | chr7  | Body    | 1.28 | (0.91; 1.8)  | 1.6E-01 |
| cg04321470 | <i>AKAP13</i>  | chr15 | Body    | 0.8  | (0.58; 1.1)  | 1.6E-01 |
| cg03717942 | <i>ATF7</i>    | chr12 | TSS1500 | 1.36 | (0.88; 2.09) | 1.6E-01 |
| cg03717942 | <i>ATF7</i>    | chr12 | TSS200  | 1.36 | (0.88; 2.09) | 1.6E-01 |
| cg02907102 | <i>CUX2</i>    | chr12 | Body    | 1.42 | (0.87; 2.32) | 1.6E-01 |
| cg06707406 | <i>NRXN1</i>   | chr2  | Body    | 0.76 | (0.52; 1.12) | 1.6E-01 |
| cg12398651 | <i>RNU5E-1</i> | chr5  | Body    | 0.79 | (0.57; 1.1)  | 1.6E-01 |
| cg21611461 | <i>RNU5E-1</i> | chr5  | Body    | 0.8  | (0.58; 1.1)  | 1.6E-01 |
| cg15727524 | <i>PTPRN2</i>  | chr7  | Body    | 0.8  | (0.58; 1.1)  | 1.6E-01 |
| cg13401196 | <i>PTPRN2</i>  | chr7  | Body    | 1.27 | (0.91; 1.77) | 1.6E-01 |
| cg18499250 | <i>CTDSPL</i>  | chr3  | Body    | 0.79 | (0.57; 1.1)  | 1.6E-01 |



|            |                  |       |         |      |              |         |
|------------|------------------|-------|---------|------|--------------|---------|
| cg22087642 | <i>PTPRN2</i>    | chr7  | Body    | 0.62 | (0.31; 1.22) | 1.6E-01 |
| cg05224021 | <i>CSMD2</i>     | chr1  | Body    | 1.29 | (0.9; 1.83)  | 1.6E-01 |
| cg24998459 | <i>PTPRN2</i>    | chr7  | Body    | 0.79 | (0.57; 1.1)  | 1.6E-01 |
| cg26510975 | <i>TNRC18</i>    | chr7  | 3'UTR   | 0.8  | (0.59; 1.09) | 1.6E-01 |
| cg08535112 | <i>SLC16A9</i>   | chr10 | Body    | 0.69 | (0.4; 1.17)  | 1.6E-01 |
| cg21750545 | <i>DCUN1D4</i>   | chr4  | 1stExon | 1.24 | (0.92; 1.67) | 1.6E-01 |
| cg21750545 | <i>DCUN1D4</i>   | chr4  | 5'UTR   | 1.24 | (0.92; 1.67) | 1.6E-01 |
| cg02301622 | <i>WVOX</i>      | chr16 | Body    | 0.77 | (0.53; 1.11) | 1.6E-01 |
| cg06612016 | <i>PTPRN2</i>    | chr7  | Body    | 0.78 | (0.55; 1.11) | 1.6E-01 |
| cg16903025 | <i>FBXO32</i>    | chr8  | Body    | 0.73 | (0.47; 1.14) | 1.6E-01 |
| cg08783300 | <i>TNFRSF10C</i> | chr8  | TSS200  | 1.32 | (0.89; 1.96) | 1.6E-01 |
| cg02132593 | <i>ZBTB20</i>    | chr3  | 5'UTR   | 0.79 | (0.57; 1.1)  | 1.6E-01 |
| cg19406367 | <i>SGIP1</i>     | chr1  | 5'UTR   | 0.79 | (0.56; 1.1)  | 1.6E-01 |
| cg19406367 | <i>SGIP1</i>     | chr1  | 1stExon | 0.79 | (0.56; 1.1)  | 1.6E-01 |
| cg18237446 | <i>PTPRN2</i>    | chr7  | Body    | 0.82 | (0.61; 1.09) | 1.6E-01 |
| cg04214710 | <i>PTPRN2</i>    | chr7  | Body    | 1.26 | (0.91; 1.76) | 1.6E-01 |
| cg19958653 | <i>WVOX</i>      | chr16 | Body    | 1.27 | (0.91; 1.78) | 1.6E-01 |
| cg08068659 | <i>ERI3</i>      | chr1  | Body    | 1.26 | (0.91; 1.74) | 1.6E-01 |
| cg16521917 | <i>CNTNAP2</i>   | chr7  | 5'UTR   | 0.69 | (0.4; 1.17)  | 1.7E-01 |
| cg16521917 | <i>CNTNAP2</i>   | chr7  | 1stExon | 0.69 | (0.4; 1.17)  | 1.7E-01 |
| cg01068714 | <i>FBXO31</i>    | chr16 | Body    | 0.79 | (0.57; 1.1)  | 1.7E-01 |
| cg02194882 | <i>ZBTB20</i>    | chr3  | 5'UTR   | 0.81 | (0.6; 1.09)  | 1.7E-01 |
| cg02194882 | <i>ZBTB20</i>    | chr3  | Body    | 0.81 | (0.6; 1.09)  | 1.7E-01 |
| cg02194882 | <i>ZBTB20</i>    | chr3  | TSS200  | 0.81 | (0.6; 1.09)  | 1.7E-01 |
| cg15408722 | <i>PTPRN2</i>    | chr7  | Body    | 1.31 | (0.89; 1.93) | 1.7E-01 |
| cg15284977 | <i>BARX2</i>     | chr11 | Body    | 1.27 | (0.91; 1.79) | 1.7E-01 |
| cg06750038 | <i>FBXO31</i>    | chr16 | Body    | 0.79 | (0.57; 1.1)  | 1.7E-01 |
| cg22331825 | <i>PTPRN2</i>    | chr7  | Body    | 1.28 | (0.9; 1.8)   | 1.7E-01 |
| cg24855446 | <i>ALCAM</i>     | chr3  | Body    | 0.79 | (0.56; 1.11) | 1.7E-01 |
| cg01879525 | <i>ZBTB20</i>    | chr3  | Body    | 0.7  | (0.43; 1.16) | 1.7E-01 |
| cg01879525 | <i>ZBTB20</i>    | chr3  | 5'UTR   | 0.7  | (0.43; 1.16) | 1.7E-01 |
| cg22464182 | <i>ACVR2A</i>    | chr2  | 5'UTR   | 1.28 | (0.9; 1.8)   | 1.7E-01 |
| cg22464182 | <i>ACVR2A</i>    | chr2  | 1stExon | 1.28 | (0.9; 1.8)   | 1.7E-01 |
| cg00771935 | <i>FBXO31</i>    | chr16 | Body    | 1.28 | (0.9; 1.8)   | 1.7E-01 |
| cg02117685 | <i>RECQL5</i>    | chr17 | Body    | 0.79 | (0.57; 1.1)  | 1.7E-01 |
| cg14779376 | <i>PTPRN2</i>    | chr7  | Body    | 1.23 | (0.92; 1.66) | 1.7E-01 |
| cg26140240 | <i>PTPRN2</i>    | chr7  | Body    | 1.28 | (0.9; 1.81)  | 1.7E-01 |
| cg18504656 | <i>DACH1</i>     | chr13 | Body    | 0.78 | (0.55; 1.11) | 1.7E-01 |
| cg14404064 | <i>DNAI2</i>     | chr17 | 5'UTR   | 0.76 | (0.51; 1.12) | 1.7E-01 |
| cg17540765 | <i>RECQL5</i>    | chr17 | Body    | 0.78 | (0.55; 1.11) | 1.7E-01 |
| cg02854791 | <i>PTPRN2</i>    | chr7  | Body    | 1.25 | (0.91; 1.72) | 1.7E-01 |
| cg18451156 | <i>CHFR</i>      | chr12 | Body    | 0.77 | (0.53; 1.12) | 1.7E-01 |
| cg11645141 | <i>AKAP13</i>    | chr15 | Body    | 1.28 | (0.9; 1.8)   | 1.7E-01 |
| cg05874309 | <i>CPEB1</i>     | chr15 | Body    | 1.23 | (0.92; 1.66) | 1.7E-01 |
| cg15965891 | <i>PTPRN2</i>    | chr7  | Body    | 0.73 | (0.47; 1.14) | 1.7E-01 |
| cg04071872 | <i>FBXO34</i>    | chr14 | TSS1500 | 0.76 | (0.51; 1.12) | 1.7E-01 |
| cg09301410 | <i>PTPRN2</i>    | chr7  | Body    | 1.29 | (0.9; 1.84)  | 1.7E-01 |
| cg09230507 | <i>RTN4RL1</i>   | chr17 | Body    | 0.75 | (0.5; 1.13)  | 1.7E-01 |
| cg09607915 | <i>FBXO11</i>    | chr2  | 5'UTR   | 1.49 | (0.85; 2.61) | 1.7E-01 |
| cg14720477 | <i>TENM2</i>     | chr5  | Body    | 0.72 | (0.46; 1.15) | 1.7E-01 |
| cg21182322 | <i>POU2F1</i>    | chr1  | TSS1500 | 0.8  | (0.59; 1.1)  | 1.7E-01 |
| cg07895284 | <i>TAOK3</i>     | chr12 | 5'UTR   | 1.23 | (0.92; 1.67) | 1.7E-01 |
| cg03561600 | <i>WVOX</i>      | chr16 | Body    | 1.58 | (0.82; 3.03) | 1.7E-01 |
| cg13382322 | <i>BRUNOL4</i>   | chr18 | TSS1500 | 1.33 | (0.89; 1.99) | 1.7E-01 |
| cg07055718 | <i>HMGB4</i>     | chr1  | TSS1500 | 0.73 | (0.47; 1.14) | 1.7E-01 |
| cg07055718 | <i>CSMD2</i>     | chr1  | Body    | 0.73 | (0.47; 1.14) | 1.7E-01 |
| cg21170961 | <i>ZBTB20</i>    | chr3  | Body    | 1.36 | (0.88; 2.12) | 1.7E-01 |
| cg21170961 | <i>ZBTB20</i>    | chr3  | 5'UTR   | 1.36 | (0.88; 2.12) | 1.7E-01 |
| cg27119004 | <i>FBXO31</i>    | chr16 | Body    | 1.27 | (0.9; 1.78)  | 1.7E-01 |
| cg05901462 | <i>PTPRN2</i>    | chr7  | Body    | 0.79 | (0.56; 1.11) | 1.7E-01 |
| cg22556505 | <i>CNTNAP2</i>   | chr7  | Body    | 0.73 | (0.47; 1.14) | 1.7E-01 |



|            |                     |       |         |      |              |         |
|------------|---------------------|-------|---------|------|--------------|---------|
| cg00056624 | <i>CTDSPL</i>       | chr3  | TSS1500 | 0.8  | (0.59; 1.1)  | 1.7E-01 |
| cg08348475 | <i>TNFRSF12A</i>    | chr16 | TSS1500 | 0.79 | (0.56; 1.11) | 1.7E-01 |
| cg12802468 | <i>PTPRN2</i>       | chr7  | Body    | 0.81 | (0.59; 1.1)  | 1.7E-01 |
| cg14597280 | <i>PTPRN2</i>       | chr7  | Body    | 1.27 | (0.9; 1.79)  | 1.7E-01 |
| cg03276831 | <i>ERI3</i>         | chr1  | Body    | 1.28 | (0.9; 1.82)  | 1.7E-01 |
| cg21048050 | <i>DMXL2</i>        | chr15 | Body    | 1.25 | (0.91; 1.7)  | 1.7E-01 |
| cg26539949 | <i>ZBTB20</i>       | chr3  | 5'UTR   | 0.69 | (0.41; 1.17) | 1.7E-01 |
| cg26539949 | <i>ZBTB20</i>       | chr3  | Body    | 0.69 | (0.41; 1.17) | 1.7E-01 |
| cg08229360 | <i>CTDSPL</i>       | chr3  | Body    | 1.91 | (0.76; 4.78) | 1.7E-01 |
| cg21804178 | <i>NOL4L</i>        | chr20 | TSS1500 | 1.28 | (0.9; 1.81)  | 1.7E-01 |
| cg19892140 | <i>ZBTB20</i>       | chr3  | Body    | 0.82 | (0.62; 1.09) | 1.7E-01 |
| cg21211608 | <i>RAP1B</i>        | chr12 | TSS1500 | 1.26 | (0.91; 1.76) | 1.7E-01 |
| cg02301039 | <i>TXNDC9</i>       | chr2  | 5'UTR   | 0.78 | (0.55; 1.11) | 1.7E-01 |
| cg15524111 | <i>FBXO31</i>       | chr16 | Body    | 1.29 | (0.9; 1.87)  | 1.7E-01 |
| cg15524111 | <i>FBXO31</i>       | chr16 | ExonBnd | 1.29 | (0.9; 1.87)  | 1.7E-01 |
| cg00677455 | <i>CTDSP2</i>       | chr12 | TSS1500 | 1.22 | (0.92; 1.63) | 1.7E-01 |
| cg19228118 | <i>CSMD2</i>        | chr1  | Body    | 1.26 | (0.91; 1.75) | 1.7E-01 |
| cg27578811 | <i>CPEB1</i>        | chr15 | Body    | 0.77 | (0.53; 1.12) | 1.7E-01 |
| cg19837298 | <i>TNRC18</i>       | chr7  | Body    | 1.25 | (0.91; 1.7)  | 1.7E-01 |
| cg21312939 | <i>AKAP13</i>       | chr15 | Body    | 0.77 | (0.52; 1.12) | 1.7E-01 |
| cg25099403 | <i>POU2F1</i>       | chr1  | TSS200  | 0.82 | (0.61; 1.09) | 1.7E-01 |
| cg25099403 | <i>POU2F1</i>       | chr1  | TSS1500 | 0.82 | (0.61; 1.09) | 1.7E-01 |
| cg20156450 | <i>SLC16A9</i>      | chr10 | TSS1500 | 0.77 | (0.53; 1.12) | 1.7E-01 |
| cg22242926 | <i>RECQL5</i>       | chr17 | Body    | 0.78 | (0.54; 1.12) | 1.7E-01 |
| cg08920745 | <i>TNFRSF11B</i>    | chr8  | TSS1500 | 0.79 | (0.57; 1.1)  | 1.7E-01 |
| cg27346088 | <i>SLC16A9</i>      | chr10 | TSS200  | 1.31 | (0.89; 1.93) | 1.7E-01 |
| cg05239225 | <i>AKAP13</i>       | chr15 | 5'UTR   | 1.61 | (0.81; 3.21) | 1.7E-01 |
| cg06219351 | <i>PTPRN2</i>       | chr7  | Body    | 1.25 | (0.91; 1.72) | 1.7E-01 |
| cg25993717 | <i>ZBTB20</i>       | chr3  | TSS200  | 0.8  | (0.58; 1.1)  | 1.7E-01 |
| cg15807855 | <i>PTPRN2</i>       | chr7  | Body    | 0.79 | (0.56; 1.11) | 1.7E-01 |
| cg20653662 | <i>DDHD2</i>        | chr8  | Body    | 0.76 | (0.51; 1.13) | 1.7E-01 |
| cg04633846 | <i>PHACTR1</i>      | chr6  | Body    | 1.27 | (0.9; 1.77)  | 1.7E-01 |
| cg23318724 | <i>CTDSPL2</i>      | chr15 | Body    | 1.23 | (0.91; 1.67) | 1.7E-01 |
| cg22383831 | <i>PTPRN2</i>       | chr7  | Body    | 1.23 | (0.91; 1.67) | 1.7E-01 |
| cg00769251 | <i>CDH11</i>        | chr16 | Body    | 0.78 | (0.55; 1.11) | 1.7E-01 |
| cg18525240 | <i>CTNND2</i>       | chr5  | Body    | 0.78 | (0.55; 1.11) | 1.7E-01 |
| cg18748888 | <i>TNRC6C</i>       | chr17 | 3'UTR   | 0.76 | (0.52; 1.13) | 1.7E-01 |
| cg20378837 | <i>TNRC18</i>       | chr7  | Body    | 1.27 | (0.9; 1.78)  | 1.7E-01 |
| cg10218605 | <i>PTPRN2</i>       | chr7  | Body    | 0.81 | (0.6; 1.09)  | 1.7E-01 |
| cg01900212 | <i>TNFRSF11A</i>    | chr18 | Body    | 0.79 | (0.57; 1.11) | 1.7E-01 |
| cg12983997 | <i>PHACTR1</i>      | chr6  | ExonBnd | 1.31 | (0.89; 1.93) | 1.7E-01 |
| cg12983997 | <i>PHACTR1</i>      | chr6  | Body    | 1.31 | (0.89; 1.93) | 1.7E-01 |
| cg11761615 | <i>TNRC18</i>       | chr7  | Body    | 0.79 | (0.56; 1.11) | 1.7E-01 |
| cg09226185 | <i>PTPRN2</i>       | chr7  | Body    | 1.28 | (0.9; 1.81)  | 1.7E-01 |
| cg17196984 | <i>ARID1A</i>       | chr1  | Body    | 1.22 | (0.92; 1.62) | 1.7E-01 |
| cg24311743 | <i>UBE2E2</i>       | chr3  | TSS1500 | 0.73 | (0.46; 1.15) | 1.7E-01 |
| cg04207084 | <i>PTPRN2</i>       | chr7  | Body    | 0.77 | (0.52; 1.12) | 1.7E-01 |
| cg02118559 | <i>CTNND2</i>       | chr5  | 3'UTR   | 1.3  | (0.89; 1.88) | 1.7E-01 |
| cg13117953 | <i>PTPRN2</i>       | chr7  | Body    | 0.79 | (0.56; 1.11) | 1.7E-01 |
| cg20045572 | <i>SMARCD3</i>      | chr7  | TSS1500 | 1.33 | (0.88; 1.99) | 1.7E-01 |
| cg05695384 | <i>CSMD2</i>        | chr1  | Body    | 0.77 | (0.53; 1.12) | 1.7E-01 |
| cg04166874 | <i>ERI3</i>         | chr1  | TSS1500 | 1.26 | (0.9; 1.74)  | 1.7E-01 |
| cg14190846 | <i>ATF7IP</i>       | chr12 | 5'UTR   | 0.81 | (0.59; 1.1)  | 1.7E-01 |
| cg14190846 | <i>ATF7IP</i>       | chr12 | TSS200  | 0.81 | (0.59; 1.1)  | 1.7E-01 |
| cg12634271 | <i>MEIS2</i>        | chr15 | 3'UTR   | 0.61 | (0.29; 1.25) | 1.7E-01 |
| cg12634271 | <i>MEIS2</i>        | chr15 | Body    | 0.61 | (0.29; 1.25) | 1.7E-01 |
| cg08600538 | <i>CTDSPL2</i>      | chr15 | 5'UTR   | 1.26 | (0.9; 1.77)  | 1.7E-01 |
| cg08004934 | <i>LOC101928417</i> | chr16 | Body    | 0.79 | (0.56; 1.11) | 1.7E-01 |
| cg08004934 | <i>CDH13</i>        | chr16 | 5'UTR   | 0.79 | (0.56; 1.11) | 1.7E-01 |
| cg08004934 | <i>CDH13</i>        | chr16 | Body    | 0.79 | (0.56; 1.11) | 1.7E-01 |
| cg11367633 | <i>CHD6</i>         | chr20 | TSS1500 | 0.72 | (0.45; 1.16) | 1.7E-01 |



|            |                  |       |         |      |              |         |
|------------|------------------|-------|---------|------|--------------|---------|
| cg10285392 | <i>POU2F1</i>    | chr1  | Body    | 0.79 | (0.57; 1.11) | 1.7E-01 |
| cg23070153 | <i>CUX2</i>      | chr12 | Body    | 0.79 | (0.56; 1.11) | 1.7E-01 |
| cg12619398 | <i>DDHD2</i>     | chr8  | 5'UTR   | 0.8  | (0.59; 1.1)  | 1.7E-01 |
| cg12619398 | <i>DDHD2</i>     | chr8  | TSS200  | 0.8  | (0.59; 1.1)  | 1.7E-01 |
| cg09970590 | <i>MEIS2</i>     | chr15 | Body    | 1.28 | (0.9; 1.82)  | 1.8E-01 |
| cg02851312 | <i>PTPRN2</i>    | chr7  | Body    | 0.79 | (0.56; 1.11) | 1.8E-01 |
| cg05437294 | <i>PTPRN2</i>    | chr7  | Body    | 1.23 | (0.91; 1.65) | 1.8E-01 |
| cg12419766 | <i>PTPRN2</i>    | chr7  | Body    | 1.31 | (0.89; 1.92) | 1.8E-01 |
| cg08954353 | <i>TNFRSF10B</i> | chr8  | Body    | 1.36 | (0.87; 2.12) | 1.8E-01 |
| cg13462030 | <i>TNFRSF10B</i> | chr8  | TSS1500 | 0.81 | (0.59; 1.1)  | 1.8E-01 |
| cg21872919 | <i>PTPRN2</i>    | chr7  | Body    | 1.25 | (0.91; 1.72) | 1.8E-01 |
| cg17298352 | <i>AKAP13</i>    | chr15 | Body    | 0.76 | (0.51; 1.13) | 1.8E-01 |
| cg10329117 | <i>CSMD2</i>     | chr1  | Body    | 0.78 | (0.55; 1.12) | 1.8E-01 |
| cg16263825 | <i>ZBTB20</i>    | chr3  | TSS1500 | 1.26 | (0.9; 1.75)  | 1.8E-01 |
| cg00499831 | <i>CSMD2</i>     | chr1  | Body    | 1.28 | (0.9; 1.82)  | 1.8E-01 |
| cg12601933 | <i>TNFRSF1B</i>  | chr1  | Body    | 1.25 | (0.91; 1.72) | 1.8E-01 |
| cg04045539 | <i>TNR</i>       | chr1  | Body    | 1.25 | (0.9; 1.73)  | 1.8E-01 |
| cg04514601 | <i>MBD5</i>      | chr2  | Body    | 1.25 | (0.9; 1.74)  | 1.8E-01 |
| cg26356782 | <i>PHACTR1</i>   | chr6  | Body    | 1.28 | (0.89; 1.84) | 1.8E-01 |
| cg02467339 | <i>PTPRN2</i>    | chr7  | Body    | 1.29 | (0.89; 1.88) | 1.8E-01 |
| cg14338114 | <i>ZBTB20</i>    | chr3  | 5'UTR   | 0.75 | (0.49; 1.14) | 1.8E-01 |
| cg20387392 | <i>ZBTB20</i>    | chr3  | 5'UTR   | 0.8  | (0.58; 1.11) | 1.8E-01 |
| cg00296158 | <i>POU2F1</i>    | chr1  | TSS1500 | 0.77 | (0.53; 1.13) | 1.8E-01 |
| cg16595458 | <i>CNTNAP2</i>   | chr7  | Body    | 0.75 | (0.49; 1.14) | 1.8E-01 |
| cg16478012 | <i>FBXO31</i>    | chr16 | TSS200  | 0.81 | (0.6; 1.1)   | 1.8E-01 |
| cg27330193 | <i>ZBTB20</i>    | chr3  | 5'UTR   | 0.77 | (0.52; 1.13) | 1.8E-01 |
| cg16594495 | <i>PHACTR1</i>   | chr6  | Body    | 1.35 | (0.87; 2.07) | 1.8E-01 |
| cg10653465 | <i>AKAP13</i>    | chr15 | Body    | 0.78 | (0.54; 1.12) | 1.8E-01 |
| cg05483509 | <i>ATP6V0C</i>   | chr16 | TSS1500 | 0.78 | (0.55; 1.12) | 1.8E-01 |
| cg14932349 | <i>CREBBP</i>    | chr16 | Body    | 1.25 | (0.9; 1.73)  | 1.8E-01 |
| cg07624226 | <i>PTPRN2</i>    | chr7  | Body    | 0.8  | (0.57; 1.11) | 1.8E-01 |
| cg08996334 | <i>ZBTB20</i>    | chr3  | 5'UTR   | 1.26 | (0.9; 1.76)  | 1.8E-01 |
| cg15307908 | <i>FBXO32</i>    | chr8  | TSS200  | 1.31 | (0.88; 1.94) | 1.8E-01 |
| cg07657658 | <i>CNTNAP2</i>   | chr7  | Body    | 1.27 | (0.9; 1.79)  | 1.8E-01 |
| cg07536341 | <i>NDUFA9</i>    | chr12 | TSS200  | 0.79 | (0.56; 1.11) | 1.8E-01 |
| cg08777703 | <i>DACH1</i>     | chr13 | Body    | 0.7  | (0.42; 1.18) | 1.8E-01 |
| cg19795796 | <i>PTPRN2</i>    | chr7  | Body    | 1.25 | (0.9; 1.73)  | 1.8E-01 |
| cg00476944 | <i>PTPRN2</i>    | chr7  | Body    | 0.75 | (0.49; 1.14) | 1.8E-01 |
| cg04732872 | <i>ELAVL4</i>    | chr1  | TSS200  | 1.29 | (0.89; 1.86) | 1.8E-01 |
| cg04732872 | <i>ELAVL4</i>    | chr1  | Body    | 1.29 | (0.89; 1.86) | 1.8E-01 |
| cg21579197 | <i>MEIS2</i>     | chr15 | Body    | 0.8  | (0.57; 1.11) | 1.8E-01 |
| cg12261762 | <i>MTCL1</i>     | chr18 | Body    | 1.25 | (0.9; 1.72)  | 1.8E-01 |
| cg02492778 | <i>CSMD2</i>     | chr1  | Body    | 0.81 | (0.59; 1.11) | 1.8E-01 |
| cg22282410 | <i>PTPRN2</i>    | chr7  | TSS1500 | 0.76 | (0.51; 1.13) | 1.8E-01 |
| cg26252389 | <i>ERI3</i>      | chr1  | Body    | 1.34 | (0.87; 2.06) | 1.8E-01 |
| cg11424597 | <i>ERI3</i>      | chr1  | 1stExon | 0.77 | (0.52; 1.13) | 1.8E-01 |
| cg11424597 | <i>ERI3</i>      | chr1  | 5'UTR   | 0.77 | (0.52; 1.13) | 1.8E-01 |
| cg16677554 | <i>ATP6V0C</i>   | chr16 | TSS1500 | 1.31 | (0.88; 1.95) | 1.8E-01 |
| cg16677554 | <i>ATP6V0C</i>   | chr16 | TSS200  | 1.31 | (0.88; 1.95) | 1.8E-01 |
| cg02030008 | <i>PTPRN2</i>    | chr7  | Body    | 1.27 | (0.89; 1.81) | 1.8E-01 |
| cg16016583 | <i>PTPRN2</i>    | chr7  | Body    | 0.74 | (0.47; 1.15) | 1.8E-01 |
| cg16728539 | <i>CACNA1C</i>   | chr12 | Body    | 0.47 | (0.16; 1.42) | 1.8E-01 |
| cg11724873 | <i>WAC</i>       | chr10 | Body    | 1.23 | (0.91; 1.65) | 1.8E-01 |
| cg01536803 | <i>PTPRN2</i>    | chr7  | Body    | 1.26 | (0.9; 1.76)  | 1.8E-01 |
| cg21681396 | <i>CSMD2</i>     | chr1  | Body    | 0.81 | (0.59; 1.11) | 1.8E-01 |
| cg21762610 | <i>UNC80</i>     | chr2  | Body    | 1.28 | (0.89; 1.84) | 1.8E-01 |
| cg23653008 | <i>CHFR</i>      | chr12 | TSS1500 | 0.8  | (0.58; 1.11) | 1.8E-01 |
| cg00163546 | <i>BRUNOL4</i>   | chr18 | Body    | 1.3  | (0.88; 1.92) | 1.8E-01 |
| cg16761843 | <i>TENM2</i>     | chr5  | Body    | 0.78 | (0.54; 1.13) | 1.8E-01 |
| cg00847166 | <i>CTNND2</i>    | chr5  | TSS1500 | 1.23 | (0.91; 1.66) | 1.8E-01 |
| cg13900349 | <i>PTPRN2</i>    | chr7  | Body    | 1.31 | (0.88; 1.94) | 1.8E-01 |



|            |                    |       |         |      |              |         |
|------------|--------------------|-------|---------|------|--------------|---------|
| cg05928980 | <i>PTPRU</i>       | chr1  | Body    | 0.79 | (0.56; 1.12) | 1.8E-01 |
| cg01047111 | <i>UBE2E2</i>      | chr3  | Body    | 1.39 | (0.86; 2.27) | 1.8E-01 |
| cg05544095 | <i>ZBTB20</i>      | chr3  | 5'UTR   | 1.43 | (0.84; 2.44) | 1.8E-01 |
| cg22770560 | <i>PTPRN2</i>      | chr7  | Body    | 1.29 | (0.89; 1.87) | 1.8E-01 |
| cg25737169 | <i>AKAP13</i>      | chr15 | Body    | 0.78 | (0.55; 1.12) | 1.8E-01 |
| cg11397606 | <i>SGIP1</i>       | chr1  | Body    | 0.77 | (0.52; 1.13) | 1.8E-01 |
| cg03627409 | <i>PTPRU</i>       | chr1  | Body    | 0.78 | (0.54; 1.12) | 1.8E-01 |
| cg14420245 | <i>ACVR2A</i>      | chr2  | TSS1500 | 1.24 | (0.9; 1.71)  | 1.8E-01 |
| cg26781464 | <i>ZNF704</i>      | chr8  | 3'UTR   | 1.32 | (0.88; 1.97) | 1.8E-01 |
| cg07826767 | <i>PTPRS</i>       | chr19 | Body    | 0.8  | (0.58; 1.11) | 1.8E-01 |
| cg02331784 | <i>ZBTB20</i>      | chr3  | 5'UTR   | 0.51 | (0.19; 1.37) | 1.8E-01 |
| cg02331784 | <i>ZBTB20</i>      | chr3  | Body    | 0.51 | (0.19; 1.37) | 1.8E-01 |
| cg23616097 | <i>TNRC18</i>      | chr7  | TSS200  | 0.75 | (0.5; 1.14)  | 1.8E-01 |
| cg18943258 | <i>NOL4L</i>       | chr20 | Body    | 0.77 | (0.52; 1.13) | 1.8E-01 |
| cg10409449 | <i>AKAP13</i>      | chr15 | Body    | 0.82 | (0.61; 1.1)  | 1.8E-01 |
| cg25436034 | <i>AKAP13</i>      | chr15 | Body    | 0.62 | (0.3; 1.26)  | 1.8E-01 |
| cg09077609 | <i>PTPRN2</i>      | chr7  | Body    | 0.8  | (0.57; 1.11) | 1.8E-01 |
| cg14607496 | <i>ZNF704</i>      | chr8  | Body    | 0.68 | (0.39; 1.2)  | 1.8E-01 |
| cg09247695 | <i>PTPRN2</i>      | chr7  | Body    | 0.81 | (0.6; 1.1)   | 1.8E-01 |
| cg11610558 | <i>CTDSPL2</i>     | chr15 | Body    | 0.8  | (0.58; 1.11) | 1.8E-01 |
| cg24506862 | <i>BRUNOL4</i>     | chr18 | TSS1500 | 0.72 | (0.45; 1.17) | 1.8E-01 |
| cg27402091 | <i>PTPRN2</i>      | chr7  | Body    | 1.25 | (0.9; 1.75)  | 1.8E-01 |
| cg07884070 | <i>RAP1B</i>       | chr12 | 5'UTR   | 1.23 | (0.91; 1.67) | 1.8E-01 |
| cg21685565 | <i>GNA12</i>       | chr7  | 1stExon | 0.81 | (0.6; 1.1)   | 1.8E-01 |
| cg16512311 | <i>CDH13</i>       | chr16 | Body    | 1.25 | (0.9; 1.74)  | 1.8E-01 |
| cg25720625 | <i>CACNA1C</i>     | chr12 | Body    | 0.8  | (0.57; 1.11) | 1.8E-01 |
| cg06677781 | <i>ZFP91</i>       | chr11 | TSS1500 | 1.21 | (0.91; 1.62) | 1.8E-01 |
| cg12625454 | <i>PTPRN2</i>      | chr7  | Body    | 1.23 | (0.9; 1.68)  | 1.9E-01 |
| cg02530350 | <i>CNTNAP2</i>     | chr7  | Body    | 0.73 | (0.46; 1.16) | 1.9E-01 |
| cg13509638 | <i>TNFRSF1B</i>    | chr1  | Body    | 0.43 | (0.12; 1.5)  | 1.9E-01 |
| cg22416051 | <i>PTPRN2</i>      | chr7  | Body    | 1.25 | (0.9; 1.74)  | 1.9E-01 |
| cg22063108 | <i>GNA12</i>       | chr7  | Body    | 1.22 | (0.91; 1.62) | 1.9E-01 |
| cg01833890 | <i>CACNA1C</i>     | chr12 | Body    | 1.45 | (0.84; 2.5)  | 1.9E-01 |
| cg23447239 | <i>PTPRN2</i>      | chr7  | Body    | 1.23 | (0.91; 1.67) | 1.9E-01 |
| cg16218340 | <i>CHCHD6</i>      | chr3  | TSS1500 | 1.22 | (0.91; 1.65) | 1.9E-01 |
| cg17190608 | <i>CUX2</i>        | chr12 | TSS1500 | 1.25 | (0.9; 1.74)  | 1.9E-01 |
| cg20655099 | <i>TNRC18</i>      | chr7  | Body    | 1.36 | (0.86; 2.16) | 1.9E-01 |
| cg22527572 | <i>AKAP3</i>       | chr12 | Body    | 0.78 | (0.55; 1.13) | 1.9E-01 |
| cg04643437 | <i>ATF7IP</i>      | chr12 | 5'UTR   | 0.81 | (0.59; 1.11) | 1.9E-01 |
| cg04643437 | <i>ATF7IP</i>      | chr12 | 1stExon | 0.81 | (0.59; 1.11) | 1.9E-01 |
| cg09356014 | <i>FBXO31</i>      | chr16 | Body    | 1.24 | (0.9; 1.72)  | 1.9E-01 |
| cg12855611 | <i>DNAI2</i>       | chr17 | Body    | 0.81 | (0.59; 1.11) | 1.9E-01 |
| cg22648168 | <i>ZBTB20</i>      | chr3  | TSS1500 | 1.26 | (0.89; 1.77) | 1.9E-01 |
| cg22648168 | <i>ZBTB20</i>      | chr3  | 5'UTR   | 1.26 | (0.89; 1.77) | 1.9E-01 |
| cg24445167 | <i>CACNA1C</i>     | chr12 | Body    | 0.72 | (0.44; 1.18) | 1.9E-01 |
| cg05790989 | <i>POU2F1</i>      | chr1  | 5'UTR   | 1.45 | (0.83; 2.51) | 1.9E-01 |
| cg16341266 | <i>CNTNAP2</i>     | chr7  | Body    | 1.42 | (0.84; 2.38) | 1.9E-01 |
| cg01172234 | <i>PTPRN2</i>      | chr7  | Body    | 0.81 | (0.58; 1.11) | 1.9E-01 |
| cg13562751 | <i>PHACTR1</i>     | chr6  | Body    | 1.27 | (0.89; 1.82) | 1.9E-01 |
| cg08635011 | <i>CUX2</i>        | chr12 | Body    | 0.81 | (0.59; 1.11) | 1.9E-01 |
| cg04344190 | <i>WWOX</i>        | chr16 | Body    | 1.26 | (0.89; 1.79) | 1.9E-01 |
| cg13033090 | <i>BRUNOL4</i>     | chr18 | TSS200  | 0.76 | (0.51; 1.14) | 1.9E-01 |
| cg07267845 | <i>PTPRN2</i>      | chr7  | Body    | 0.72 | (0.43; 1.18) | 1.9E-01 |
| cg04584023 | <i>CACNA1C</i>     | chr12 | Body    | 0.73 | (0.45; 1.17) | 1.9E-01 |
| cg15057818 | <i>PTPRN2</i>      | chr7  | Body    | 0.78 | (0.54; 1.13) | 1.9E-01 |
| cg05861880 | <i>CACNA1C-IT2</i> | chr12 | TSS1500 | 0.76 | (0.51; 1.14) | 1.9E-01 |
| cg09439964 | <i>ORC4</i>        | chr2  | 5'UTR   | 0.76 | (0.5; 1.15)  | 1.9E-01 |
| cg10733196 | <i>RTN4RL1</i>     | chr17 | Body    | 1.26 | (0.89; 1.78) | 1.9E-01 |
| cg16937735 | <i>PTPRN2</i>      | chr7  | Body    | 0.82 | (0.61; 1.1)  | 1.9E-01 |
| cg14566868 | <i>AKAP13</i>      | chr15 | Body    | 0.73 | (0.46; 1.16) | 1.9E-01 |
| cg23364266 | <i>PTPRN2</i>      | chr7  | Body    | 0.8  | (0.58; 1.11) | 1.9E-01 |



|            |          |       |         |      |              |         |
|------------|----------|-------|---------|------|--------------|---------|
| cg15014116 | SMARCD3  | chr7  | Body    | 1.26 | (0.89; 1.77) | 1.9E-01 |
| cg20427538 | DNAI2    | chr17 | Body    | 1.32 | (0.87; 1.99) | 1.9E-01 |
| cg26600653 | PTPRN2   | chr7  | Body    | 1.26 | (0.89; 1.77) | 1.9E-01 |
| cg00589639 | RECQL5   | chr17 | 1stExon | 1.24 | (0.9; 1.71)  | 1.9E-01 |
| cg00589639 | RECQL5   | chr17 | 5'UTR   | 1.24 | (0.9; 1.71)  | 1.9E-01 |
| cg09816107 | TNRC6A   | chr16 | Body    | 1.26 | (0.89; 1.78) | 1.9E-01 |
| cg26837182 | POU2F1   | chr1  | Body    | 0.71 | (0.43; 1.18) | 1.9E-01 |
| cg22950899 | PTPRS    | chr19 | Body    | 1.26 | (0.89; 1.8)  | 1.9E-01 |
| cg16186051 | CHD6     | chr20 | TSS200  | 1.25 | (0.89; 1.76) | 1.9E-01 |
| cg16718902 | TNRC18   | chr7  | Body    | 0.8  | (0.57; 1.12) | 1.9E-01 |
| cg10952495 | TSHZ3    | chr19 | Body    | 0.61 | (0.29; 1.28) | 1.9E-01 |
| cg19405040 | COL5A2   | chr2  | Body    | 0.76 | (0.5; 1.15)  | 1.9E-01 |
| cg08677692 | PTPRN2   | chr7  | Body    | 0.81 | (0.6; 1.11)  | 1.9E-01 |
| cg26861487 | PTPRN2   | chr7  | Body    | 1.26 | (0.89; 1.79) | 1.9E-01 |
| cg06281409 | FBXO38   | chr5  | Body    | 1.34 | (0.86; 2.09) | 1.9E-01 |
| cg10739246 | ERI3     | chr1  | Body    | 1.27 | (0.89; 1.82) | 1.9E-01 |
| cg10739246 | ERI3     | chr1  | 5'UTR   | 1.27 | (0.89; 1.82) | 1.9E-01 |
| cg06949619 | TNRC18   | chr7  | Body    | 0.79 | (0.56; 1.12) | 1.9E-01 |
| cg10802509 | SGIP1    | chr1  | Body    | 1.38 | (0.85; 2.24) | 1.9E-01 |
| cg09559021 | CSMD2    | chr1  | Body    | 1.4  | (0.84; 2.33) | 1.9E-01 |
| cg03017865 | CEP350   | chr1  | Body    | 0.79 | (0.56; 1.12) | 1.9E-01 |
| cg20818337 | RTN4     | chr2  | TSS200  | 0.81 | (0.59; 1.11) | 1.9E-01 |
| cg21921460 | CTNND2   | chr5  | Body    | 0.78 | (0.54; 1.13) | 1.9E-01 |
| cg18185149 | PTPRN2   | chr7  | Body    | 1.25 | (0.89; 1.75) | 1.9E-01 |
| cg19593762 | CTDSP2   | chr12 | TSS200  | 1.23 | (0.9; 1.67)  | 1.9E-01 |
| cg08502322 | TENM2    | chr5  | Body    | 0.76 | (0.5; 1.15)  | 1.9E-01 |
| cg09756125 | PTPRN2   | chr7  | Body    | 0.8  | (0.57; 1.12) | 1.9E-01 |
| cg27470433 | CACNA1C  | chr12 | Body    | 0.79 | (0.56; 1.13) | 1.9E-01 |
| cg18664013 | PTPRN2   | chr7  | Body    | 0.82 | (0.61; 1.1)  | 1.9E-01 |
| cg01363648 | PTPRU    | chr1  | Body    | 1.27 | (0.89; 1.82) | 1.9E-01 |
| cg13908074 | MBD5     | chr2  | Body    | 0.78 | (0.54; 1.13) | 1.9E-01 |
| cg08165083 | PEX14    | chr1  | Body    | 0.81 | (0.6; 1.11)  | 1.9E-01 |
| cg01615815 | CNTNAP2  | chr7  | Body    | 0.8  | (0.57; 1.12) | 1.9E-01 |
| cg16057915 | PEX14    | chr1  | 3'UTR   | 1.25 | (0.89; 1.75) | 1.9E-01 |
| cg25042845 | SRSF10   | chr1  | Body    | 1.24 | (0.9; 1.71)  | 1.9E-01 |
| cg03920574 | UBE2E2   | chr3  | Body    | 0.72 | (0.44; 1.18) | 1.9E-01 |
| cg19090762 | FBXO31   | chr16 | 5'UTR   | 0.79 | (0.56; 1.12) | 1.9E-01 |
| cg13511195 | BRUNOL4  | chr18 | Body    | 0.8  | (0.58; 1.12) | 1.9E-01 |
| cg12592194 | CTDSP2   | chr12 | 1stExon | 1.26 | (0.89; 1.79) | 1.9E-01 |
| cg12592194 | CTDSP2   | chr12 | 5'UTR   | 1.26 | (0.89; 1.79) | 1.9E-01 |
| cg07696310 | FBXO31   | chr16 | TSS1500 | 1.25 | (0.89; 1.75) | 1.9E-01 |
| cg12043230 | CACNA1C  | chr12 | Body    | 0.63 | (0.31; 1.26) | 1.9E-01 |
| cg06297677 | TENM2    | chr5  | Body    | 0.76 | (0.49; 1.15) | 1.9E-01 |
| cg21787390 | PTPRU    | chr1  | Body    | 0.79 | (0.55; 1.13) | 1.9E-01 |
| cg17051124 | PTPRN2   | chr7  | Body    | 0.81 | (0.59; 1.11) | 1.9E-01 |
| cg16546717 | GNA12    | chr7  | Body    | 0.73 | (0.46; 1.17) | 1.9E-01 |
| cg22623223 | PTPRN2   | chr7  | Body    | 0.8  | (0.57; 1.12) | 1.9E-01 |
| cg05803237 | MTNR1B   | chr11 | TSS200  | 1.33 | (0.87; 2.03) | 1.9E-01 |
| cg02258303 | FBXO31   | chr16 | Body    | 0.81 | (0.59; 1.11) | 1.9E-01 |
| cg22741595 | C11orf67 | chr11 | 5'UTR   | 0.82 | (0.61; 1.11) | 1.9E-01 |
| cg10223066 | CHFR     | chr12 | TSS1500 | 0.81 | (0.59; 1.11) | 1.9E-01 |
| cg06379340 | UNC80    | chr2  | 3'UTR   | 0.79 | (0.55; 1.13) | 1.9E-01 |
| cg06717083 | SUSD4    | chr1  | Body    | 0.78 | (0.53; 1.14) | 1.9E-01 |
| cg14549482 | BARX2    | chr11 | Body    | 0.79 | (0.55; 1.13) | 1.9E-01 |
| cg24363180 | NRXN1    | chr2  | Body    | 0.8  | (0.57; 1.12) | 1.9E-01 |
| cg21548071 | ALCAM    | chr3  | Body    | 0.82 | (0.6; 1.11)  | 1.9E-01 |
| cg15612628 | ZBTB20   | chr3  | Body    | 1.23 | (0.9; 1.68)  | 1.9E-01 |
| cg15612628 | ZBTB20   | chr3  | 5'UTR   | 1.23 | (0.9; 1.68)  | 1.9E-01 |
| cg01190876 | EIF2S1   | chr14 | 5'UTR   | 0.81 | (0.59; 1.11) | 1.9E-01 |
| cg04619955 | ATF7     | chr12 | 3'UTR   | 1.25 | (0.89; 1.74) | 1.9E-01 |
| cg04619955 | ATF7     | chr12 | Body    | 1.25 | (0.89; 1.74) | 1.9E-01 |



|            |          |       |         |      |              |         |
|------------|----------|-------|---------|------|--------------|---------|
| cg23677243 | MEIS2    | chr15 | Body    | 0.77 | (0.52; 1.14) | 1.9E-01 |
| cg02783912 | MBD5     | chr2  | 5'UTR   | 1.25 | (0.89; 1.77) | 2.0E-01 |
| cg07149535 | COL5A2   | chr2  | Body    | 1.3  | (0.87; 1.93) | 2.0E-01 |
| cg27501686 | CACNA1C  | chr12 | Body    | 0.78 | (0.54; 1.13) | 2.0E-01 |
| cg13399259 | ZBTB20   | chr3  | Body    | 0.81 | (0.59; 1.12) | 2.0E-01 |
| cg13399259 | ZBTB20   | chr3  | 5'UTR   | 0.81 | (0.59; 1.12) | 2.0E-01 |
| cg08692211 | MEIS2    | chr15 | Body    | 1.31 | (0.87; 1.99) | 2.0E-01 |
| cg18973247 | ARID1A   | chr1  | Body    | 1.25 | (0.89; 1.76) | 2.0E-01 |
| cg02481714 | TNRC6B   | chr22 | TSS1500 | 0.8  | (0.57; 1.12) | 2.0E-01 |
| cg11336887 | PTPRU    | chr1  | Body    | 1.26 | (0.89; 1.78) | 2.0E-01 |
| cg05675621 | PTPRN2   | chr7  | Body    | 0.79 | (0.55; 1.13) | 2.0E-01 |
| cg01722932 | MTNR1B   | chr11 | TSS200  | 1.34 | (0.86; 2.1)  | 2.0E-01 |
| cg27129731 | MEIS2    | chr15 | 5'UTR   | 0.82 | (0.61; 1.11) | 2.0E-01 |
| cg27129731 | MEIS2    | chr15 | TSS1500 | 0.82 | (0.61; 1.11) | 2.0E-01 |
| cg21126403 | ZBTB20   | chr3  | Body    | 0.81 | (0.58; 1.12) | 2.0E-01 |
| cg21126403 | ZBTB20   | chr3  | 5'UTR   | 0.81 | (0.58; 1.12) | 2.0E-01 |
| cg21126403 | ZBTB20   | chr3  | TSS200  | 0.81 | (0.58; 1.12) | 2.0E-01 |
| cg26189827 | SUGCT    | chr7  | Body    | 0.76 | (0.51; 1.15) | 2.0E-01 |
| cg00556515 | TNFRSF1A | chr12 | Body    | 0.81 | (0.59; 1.11) | 2.0E-01 |
| cg15855881 | AKAP13   | chr15 | Body    | 1.28 | (0.88; 1.87) | 2.0E-01 |
| cg00879840 | WWOX     | chr16 | Body    | 0.77 | (0.52; 1.14) | 2.0E-01 |
| cg05878101 | SMARCD3  | chr7  | 3'UTR   | 1.33 | (0.86; 2.05) | 2.0E-01 |
| cg08278167 | ELAVL4   | chr1  | Body    | 1.27 | (0.88; 1.82) | 2.0E-01 |
| cg22505746 | MEX3A    | chr1  | TSS1500 | 1.25 | (0.89; 1.77) | 2.0E-01 |
| cg12583607 | MTCL1    | chr18 | Body    | 0.8  | (0.56; 1.13) | 2.0E-01 |
| cg20726070 | PTPRN2   | chr7  | Body    | 1.31 | (0.87; 1.99) | 2.0E-01 |
| cg16959075 | PDE8A    | chr15 | 5'UTR   | 0.8  | (0.57; 1.12) | 2.0E-01 |
| cg16959075 | PDE8A    | chr15 | Body    | 0.8  | (0.57; 1.12) | 2.0E-01 |
| cg12176856 | PDE8A    | chr15 | Body    | 1.27 | (0.88; 1.84) | 2.0E-01 |
| cg07883956 | PDE8A    | chr15 | TSS1500 | 1.23 | (0.9; 1.68)  | 2.0E-01 |
| cg26363263 | CUX2     | chr12 | Body    | 1.3  | (0.87; 1.92) | 2.0E-01 |
| cg02459107 | SGIP1    | chr1  | Body    | 0.77 | (0.52; 1.14) | 2.0E-01 |
| cg27024992 | FBXO11   | chr2  | 5'UTR   | 0.79 | (0.56; 1.13) | 2.0E-01 |
| cg00235442 | PTPRN2   | chr7  | Body    | 1.3  | (0.87; 1.93) | 2.0E-01 |
| cg16594957 | CREBBP   | chr16 | 3'UTR   | 1.26 | (0.89; 1.78) | 2.0E-01 |
| cg21790991 | FSTL1    | chr3  | Body    | 1.26 | (0.89; 1.79) | 2.0E-01 |
| cg16153170 | CTDSPL   | chr3  | Body    | 0.78 | (0.54; 1.14) | 2.0E-01 |
| cg09136529 | BARX1    | chr9  | Body    | 1.34 | (0.86; 2.08) | 2.0E-01 |
| cg01751992 | DCUN1D4  | chr4  | Body    | 0.79 | (0.56; 1.13) | 2.0E-01 |
| cg11686722 | MEIS2    | chr15 | 5'UTR   | 1.27 | (0.88; 1.83) | 2.0E-01 |
| cg11686722 | MEIS2    | chr15 | 1stExon | 1.27 | (0.88; 1.83) | 2.0E-01 |
| cg11686722 | MEIS2    | chr15 | TSS200  | 1.27 | (0.88; 1.83) | 2.0E-01 |
| cg11686722 | MEIS2    | chr15 | TSS1500 | 1.27 | (0.88; 1.83) | 2.0E-01 |
| cg11649415 | PTPRS    | chr19 | 5'UTR   | 1.24 | (0.89; 1.71) | 2.0E-01 |
| cg24125890 | RECQL    | chr12 | 1stExon | 0.81 | (0.59; 1.12) | 2.0E-01 |
| cg24125890 | GOLT1B   | chr12 | TSS1500 | 0.81 | (0.59; 1.12) | 2.0E-01 |
| cg24125890 | RECQL    | chr12 | 5'UTR   | 0.81 | (0.59; 1.12) | 2.0E-01 |
| cg25717438 | NRXN1    | chr2  | TSS200  | 0.8  | (0.58; 1.12) | 2.0E-01 |
| cg16379698 | MTNR1A   | chr4  | Body    | 0.82 | (0.6; 1.11)  | 2.0E-01 |
| cg11218876 | PHACTR1  | chr6  | ExonBnd | 0.8  | (0.57; 1.12) | 2.0E-01 |
| cg11218876 | PHACTR1  | chr6  | 5'UTR   | 0.8  | (0.57; 1.12) | 2.0E-01 |
| cg26416745 | CSMD2    | chr1  | Body    | 1.62 | (0.77; 3.41) | 2.0E-01 |
| cg04047827 | TNRC6A   | chr16 | TSS200  | 0.82 | (0.61; 1.11) | 2.0E-01 |
| cg12763900 | ZBTB20   | chr3  | TSS200  | 0.79 | (0.56; 1.13) | 2.0E-01 |
| cg12741427 | CACNA1C  | chr12 | Body    | 1.33 | (0.86; 2.05) | 2.0E-01 |
| cg19901515 | CTNND2   | chr5  | Body    | 1.23 | (0.89; 1.7)  | 2.0E-01 |
| cg05951776 | PEX14    | chr1  | Body    | 1.39 | (0.84; 2.28) | 2.0E-01 |
| cg18451131 | TNRC18   | chr7  | Body    | 0.8  | (0.57; 1.12) | 2.0E-01 |
| cg26870936 | RECQL5   | chr17 | Body    | 0.73 | (0.44; 1.18) | 2.0E-01 |
| cg14926149 | ACVR2A   | chr2  | Body    | 0.83 | (0.62; 1.1)  | 2.0E-01 |
| cg13204432 | NRXN1    | chr2  | Body    | 0.79 | (0.56; 1.13) | 2.0E-01 |



|            |                 |       |         |      |              |         |
|------------|-----------------|-------|---------|------|--------------|---------|
| cg12796689 | <i>PTPRN2</i>   | chr7  | Body    | 1.23 | (0.89; 1.7)  | 2.0E-01 |
| cg18835653 | <i>NOL4</i>     | chr18 | Body    | 0.79 | (0.55; 1.13) | 2.0E-01 |
| cg11664313 | <i>DACH1</i>    | chr13 | TSS1500 | 1.3  | (0.87; 1.95) | 2.0E-01 |
| cg16569650 | <i>GNA12</i>    | chr7  | Body    | 0.7  | (0.41; 1.21) | 2.0E-01 |
| cg23376070 | <i>CDH13</i>    | chr16 | 5'UTR   | 0.81 | (0.58; 1.12) | 2.0E-01 |
| cg23376070 | <i>CDH13</i>    | chr16 | Body    | 0.81 | (0.58; 1.12) | 2.0E-01 |
| cg04901174 | <i>WVOX</i>     | chr16 | Body    | 0.81 | (0.58; 1.12) | 2.0E-01 |
| cg04584833 | <i>RTN4RL1</i>  | chr17 | TSS1500 | 0.81 | (0.58; 1.12) | 2.0E-01 |
| cg17134302 | <i>FBXO36</i>   | chr2  | Body    | 1.29 | (0.87; 1.89) | 2.0E-01 |
| cg05175762 | <i>PTPRN2</i>   | chr7  | Body    | 0.75 | (0.48; 1.17) | 2.0E-01 |
| cg24306278 | <i>PTPRN2</i>   | chr7  | Body    | 0.81 | (0.59; 1.12) | 2.0E-01 |
| cg16589617 | <i>CSMD2</i>    | chr1  | Body    | 0.82 | (0.6; 1.11)  | 2.0E-01 |
| cg11417811 | <i>TAOK3</i>    | chr12 | 5'UTR   | 0.79 | (0.54; 1.14) | 2.0E-01 |
| cg01341698 | <i>TAOK3</i>    | chr12 | 5'UTR   | 1.28 | (0.88; 1.87) | 2.0E-01 |
| cg14096207 | <i>SUSD4</i>    | chr1  | Body    | 1.26 | (0.88; 1.79) | 2.0E-01 |
| cg06015275 | <i>CDH13</i>    | chr16 | Body    | 0.82 | (0.6; 1.11)  | 2.0E-01 |
| cg04488837 | <i>FBXO31</i>   | chr16 | Body    | 0.82 | (0.6; 1.11)  | 2.0E-01 |
| cg10934522 | <i>TENM2</i>    | chr5  | Body    | 0.81 | (0.59; 1.12) | 2.0E-01 |
| cg18164357 | <i>C11orf67</i> | chr11 | 5'UTR   | 0.81 | (0.59; 1.12) | 2.0E-01 |
| cg06931515 | <i>SGIP1</i>    | chr1  | Body    | 0.8  | (0.57; 1.13) | 2.0E-01 |
| cg25177851 | <i>CPEB1</i>    | chr15 | Body    | 1.26 | (0.88; 1.79) | 2.0E-01 |
| cg20858308 | <i>ERI3</i>     | chr1  | Body    | 1.24 | (0.89; 1.71) | 2.0E-01 |
| cg20858308 | <i>ERI3</i>     | chr1  | 5'UTR   | 1.24 | (0.89; 1.71) | 2.0E-01 |
| cg07017275 | <i>FBXO34</i>   | chr14 | TSS200  | 0.82 | (0.6; 1.11)  | 2.0E-01 |
| cg07017275 | <i>FBXO34</i>   | chr14 | 5'UTR   | 0.82 | (0.6; 1.11)  | 2.0E-01 |
| cg02552868 | <i>FBXO31</i>   | chr16 | Body    | 1.27 | (0.88; 1.85) | 2.0E-01 |
| cg05977259 | <i>FBXO11</i>   | chr2  | TSS1500 | 0.76 | (0.49; 1.16) | 2.0E-01 |
| cg23054284 | <i>WVOX</i>     | chr16 | Body    | 1.28 | (0.88; 1.86) | 2.0E-01 |
| cg21464353 | <i>SCAF8</i>    | chr6  | Body    | 0.77 | (0.52; 1.15) | 2.0E-01 |
| cg26597305 | <i>PTPRN2</i>   | chr7  | Body    | 1.25 | (0.89; 1.77) | 2.0E-01 |
| cg25362361 | <i>TNRC6C</i>   | chr17 | Body    | 0.78 | (0.53; 1.14) | 2.0E-01 |
| cg04329969 | <i>CTNND2</i>   | chr5  | Body    | 1.25 | (0.89; 1.77) | 2.0E-01 |
| cg00023196 | <i>PTPRN2</i>   | chr7  | Body    | 0.81 | (0.58; 1.12) | 2.0E-01 |
| cg06730364 | <i>CNTNAP2</i>  | chr7  | Body    | 0.82 | (0.61; 1.11) | 2.0E-01 |
| cg02810291 | <i>AKAP13</i>   | chr15 | 5'UTR   | 1.34 | (0.85; 2.1)  | 2.0E-01 |
| cg19804009 | <i>WVOX</i>     | chr16 | Body    | 1.41 | (0.83; 2.41) | 2.0E-01 |
| cg25910285 | <i>SGIP1</i>    | chr1  | Body    | 0.8  | (0.57; 1.13) | 2.0E-01 |
| cg14821713 | <i>RTN4</i>     | chr2  | Body    | 1.29 | (0.87; 1.92) | 2.0E-01 |
| cg09441904 | <i>CDH13</i>    | chr16 | Body    | 0.83 | (0.63; 1.1)  | 2.0E-01 |
| cg06039392 | <i>MTNR1A</i>   | chr4  | TSS1500 | 0.81 | (0.59; 1.12) | 2.0E-01 |
| cg10926303 | <i>TNRC18</i>   | chr7  | Body    | 1.21 | (0.9; 1.63)  | 2.0E-01 |
| cg19059344 | <i>CDH13</i>    | chr16 | Body    | 0.79 | (0.55; 1.14) | 2.0E-01 |
| cg12209024 | <i>DCUN1D4</i>  | chr4  | Body    | 0.81 | (0.58; 1.12) | 2.0E-01 |
| cg01982592 | <i>WVOX</i>     | chr16 | Body    | 0.8  | (0.57; 1.13) | 2.0E-01 |
| cg04738410 | <i>TNRC6B</i>   | chr22 | Body    | 1.29 | (0.87; 1.9)  | 2.0E-01 |
| cg02420582 | <i>NOL4L</i>    | chr20 | Body    | 1.37 | (0.84; 2.23) | 2.0E-01 |
| cg11453792 | <i>ACVR2A</i>   | chr2  | Body    | 1.23 | (0.89; 1.69) | 2.0E-01 |
| cg02452209 | <i>PTPRN2</i>   | chr7  | Body    | 1.34 | (0.85; 2.09) | 2.0E-01 |
| cg00964557 | <i>MBD5</i>     | chr2  | 5'UTR   | 1.32 | (0.86; 2.02) | 2.1E-01 |
| cg02570004 | <i>FBXO11</i>   | chr2  | TSS1500 | 1.2  | (0.9; 1.61)  | 2.1E-01 |
| cg16200207 | <i>NRXN1</i>    | chr2  | Body    | 1.24 | (0.89; 1.75) | 2.1E-01 |
| cg03134083 | <i>TNR</i>      | chr1  | 5'UTR   | 1.23 | (0.89; 1.68) | 2.1E-01 |
| cg08055733 | <i>SUSD4</i>    | chr1  | Body    | 0.65 | (0.33; 1.27) | 2.1E-01 |
| cg17334689 | <i>TAOK3</i>    | chr12 | Body    | 0.69 | (0.39; 1.23) | 2.1E-01 |
| cg12069304 | <i>TNRC6A</i>   | chr16 | Body    | 1.21 | (0.9; 1.62)  | 2.1E-01 |
| cg27382164 | <i>CHFR</i>     | chr12 | TSS1500 | 0.81 | (0.58; 1.13) | 2.1E-01 |
| cg01250490 | <i>TNFRSF1B</i> | chr1  | Body    | 1.26 | (0.88; 1.79) | 2.1E-01 |
| cg10893656 | <i>PTPRN2</i>   | chr7  | Body    | 1.28 | (0.87; 1.87) | 2.1E-01 |
| cg02092785 | <i>PHACTR1</i>  | chr6  | Body    | 1.26 | (0.88; 1.81) | 2.1E-01 |
| cg24132146 | <i>PHACTR1</i>  | chr6  | TSS1500 | 1.28 | (0.87; 1.88) | 2.1E-01 |
| cg18089847 | <i>CUX2</i>     | chr12 | Body    | 0.8  | (0.57; 1.13) | 2.1E-01 |



|            |                  |       |         |      |              |         |
|------------|------------------|-------|---------|------|--------------|---------|
| cg09292030 | <i>PTPRN2</i>    | chr7  | Body    | 1.3  | (0.87; 1.95) | 2.1E-01 |
| cg00510447 | <i>TNFRSF12A</i> | chr16 | Body    | 1.32 | (0.86; 2.02) | 2.1E-01 |
| cg09146982 | <i>TNRC6C</i>    | chr17 | 5'UTR   | 1.23 | (0.89; 1.71) | 2.1E-01 |
| cg20066677 | <i>CHFR</i>      | chr12 | Body    | 0.79 | (0.55; 1.14) | 2.1E-01 |
| cg20199354 | <i>TNFRSF12A</i> | chr16 | TSS200  | 0.78 | (0.54; 1.14) | 2.1E-01 |
| cg12057741 | <i>TNFRSF11B</i> | chr8  | 5'UTR   | 1.26 | (0.88; 1.8)  | 2.1E-01 |
| cg12057741 | <i>TNFRSF11B</i> | chr8  | 1stExon | 1.26 | (0.88; 1.8)  | 2.1E-01 |
| cg10859424 | <i>ALCAM</i>     | chr3  | Body    | 0.47 | (0.14; 1.52) | 2.1E-01 |
| cg13812878 | <i>TNRC18</i>    | chr7  | Body    | 0.77 | (0.52; 1.15) | 2.1E-01 |
| cg10389371 | <i>AKAP13</i>    | chr15 | 5'UTR   | 1.32 | (0.86; 2.02) | 2.1E-01 |
| cg17162576 | <i>SGIP1</i>     | chr1  | TSS1500 | 0.74 | (0.46; 1.18) | 2.1E-01 |
| cg20879086 | <i>UBE2E2</i>    | chr3  | Body    | 1.32 | (0.86; 2.04) | 2.1E-01 |
| cg00574580 | <i>TNFRSF1A</i>  | chr12 | TSS1500 | 0.62 | (0.29; 1.31) | 2.1E-01 |
| cg04482825 | <i>MEIS2</i>     | chr15 | Body    | 0.76 | (0.49; 1.17) | 2.1E-01 |
| cg16558692 | <i>PTPRN2</i>    | chr7  | Body    | 0.81 | (0.58; 1.12) | 2.1E-01 |
| cg24052631 | <i>CDH13</i>     | chr16 | Body    | 0.81 | (0.59; 1.12) | 2.1E-01 |
| cg10956385 | <i>CTDSPL2</i>   | chr15 | TSS1500 | 1.27 | (0.87; 1.85) | 2.1E-01 |
| cg06378494 | <i>TNFRSF19</i>  | chr13 | 5'UTR   | 1.23 | (0.89; 1.69) | 2.1E-01 |
| cg06378494 | <i>TNFRSF19</i>  | chr13 | TSS200  | 1.23 | (0.89; 1.69) | 2.1E-01 |
| cg08514236 | <i>PTPRN2</i>    | chr7  | Body    | 1.23 | (0.89; 1.68) | 2.1E-01 |
| cg14795528 | <i>PTPRN2</i>    | chr7  | Body    | 1.26 | (0.88; 1.82) | 2.1E-01 |
| cg25203113 | <i>WAC</i>       | chr10 | Body    | 0.81 | (0.58; 1.13) | 2.1E-01 |
| cg06755671 | <i>CNTNAP2</i>   | chr7  | Body    | 1.24 | (0.89; 1.72) | 2.1E-01 |
| cg26589485 | <i>RTN4RL1</i>   | chr17 | 3'UTR   | 0.82 | (0.6; 1.12)  | 2.1E-01 |
| cg25932761 | <i>CUX2</i>      | chr12 | Body    | 0.69 | (0.39; 1.23) | 2.1E-01 |
| cg02192117 | <i>TNRC18</i>    | chr7  | Body    | 0.71 | (0.41; 1.22) | 2.1E-01 |
| cg16714616 | <i>CHD6</i>      | chr20 | TSS200  | 0.65 | (0.34; 1.27) | 2.1E-01 |
| cg25924845 | <i>ATF7IP</i>    | chr12 | 5'UTR   | 1.28 | (0.87; 1.9)  | 2.1E-01 |
| cg25924845 | <i>ATF7IP</i>    | chr12 | Body    | 1.28 | (0.87; 1.9)  | 2.1E-01 |
| cg08021602 | <i>DACH1</i>     | chr13 | Body    | 0.76 | (0.49; 1.17) | 2.1E-01 |
| cg15972572 | <i>PTPRN2</i>    | chr7  | Body    | 0.82 | (0.6; 1.12)  | 2.1E-01 |
| cg01303655 | <i>TNRC6C</i>    | chr17 | 3'UTR   | 0.75 | (0.47; 1.18) | 2.1E-01 |
| cg00171942 | <i>CSMD2</i>     | chr1  | Body    | 0.76 | (0.49; 1.17) | 2.1E-01 |
| cg25245192 | <i>DNAI2</i>     | chr17 | 3'UTR   | 1.56 | (0.78; 3.12) | 2.1E-01 |
| cg26208815 | <i>PTPRN2</i>    | chr7  | Body    | 0.79 | (0.55; 1.14) | 2.1E-01 |
| cg02543519 | <i>PTPRN2</i>    | chr7  | Body    | 1.31 | (0.86; 2.01) | 2.1E-01 |
| cg18032191 | <i>TNFRSF1A</i>  | chr12 | Body    | 1.25 | (0.88; 1.76) | 2.1E-01 |
| cg07674304 | <i>WWOX</i>      | chr16 | Body    | 1.29 | (0.86; 1.93) | 2.1E-01 |
| cg00514723 | <i>CHD6</i>      | chr20 | 5'UTR   | 0.61 | (0.28; 1.33) | 2.1E-01 |
| cg20150787 | <i>PTPRN2</i>    | chr7  | Body    | 0.82 | (0.61; 1.12) | 2.1E-01 |
| cg19580219 | <i>GOLT1B</i>    | chr12 | TSS1500 | 0.81 | (0.58; 1.13) | 2.1E-01 |
| cg19580219 | <i>RECQL</i>     | chr12 | 5'UTR   | 0.81 | (0.58; 1.13) | 2.1E-01 |
| cg10154804 | <i>DMXL2</i>     | chr15 | 5'UTR   | 0.8  | (0.57; 1.13) | 2.1E-01 |
| cg10154804 | <i>DMXL2</i>     | chr15 | 1stExon | 0.8  | (0.57; 1.13) | 2.1E-01 |
| cg09765297 | <i>CDH13</i>     | chr16 | Body    | 0.78 | (0.52; 1.16) | 2.1E-01 |
| cg02849124 | <i>ZBTB20</i>    | chr3  | Body    | 0.8  | (0.57; 1.13) | 2.1E-01 |
| cg08012252 | <i>CHCHD6</i>    | chr3  | Body    | 0.83 | (0.62; 1.11) | 2.1E-01 |
| cg04769577 | <i>GNA12</i>     | chr7  | Body    | 0.82 | (0.6; 1.12)  | 2.1E-01 |
| cg04769577 | <i>GNA12</i>     | chr7  | TSS200  | 0.82 | (0.6; 1.12)  | 2.1E-01 |
| cg14485651 | <i>UBE2E2</i>    | chr3  | Body    | 0.78 | (0.52; 1.16) | 2.1E-01 |
| cg10652281 | <i>POU2F1</i>    | chr1  | Body    | 0.82 | (0.6; 1.12)  | 2.1E-01 |
| cg24135583 | <i>PTPRN2</i>    | chr7  | Body    | 0.8  | (0.57; 1.13) | 2.1E-01 |
| cg04854662 | <i>CHCHD6</i>    | chr3  | Body    | 0.8  | (0.57; 1.14) | 2.1E-01 |
| cg22056595 | <i>PTPRN2</i>    | chr7  | Body    | 1.23 | (0.89; 1.69) | 2.1E-01 |
| cg15487748 | <i>CACNA1C</i>   | chr12 | Body    | 0.77 | (0.51; 1.16) | 2.1E-01 |
| cg23812848 | <i>PTPRN2</i>    | chr7  | Body    | 1.24 | (0.88; 1.74) | 2.1E-01 |
| cg00902185 | <i>RTN4R</i>     | chr22 | Body    | 1.33 | (0.85; 2.09) | 2.1E-01 |
| cg08725167 | <i>PTPRN2</i>    | chr7  | Body    | 0.8  | (0.56; 1.14) | 2.1E-01 |
| cg09211521 | <i>FBXO31</i>    | chr16 | TSS1500 | 1.23 | (0.89; 1.7)  | 2.1E-01 |
| cg09597759 | <i>CNTNAP2</i>   | chr7  | Body    | 1.27 | (0.87; 1.85) | 2.1E-01 |
| cg24152818 | <i>DACH1</i>     | chr13 | Body    | 0.78 | (0.52; 1.16) | 2.1E-01 |



|            |                 |       |         |      |              |         |
|------------|-----------------|-------|---------|------|--------------|---------|
| cg02768721 | <i>PTPRN2</i>   | chr7  | Body    | 1.26 | (0.87; 1.81) | 2.1E-01 |
| cg18566911 | <i>PTPRN2</i>   | chr7  | Body    | 1.27 | (0.87; 1.86) | 2.1E-01 |
| cg02538976 | <i>PTPRN2</i>   | chr7  | Body    | 0.82 | (0.6; 1.12)  | 2.2E-01 |
| cg06896316 | <i>SGIP1</i>    | chr1  | Body    | 1.23 | (0.89; 1.71) | 2.2E-01 |
| cg04877240 | <i>SUGCT</i>    | chr7  | Body    | 0.72 | (0.43; 1.21) | 2.2E-01 |
| cg23724557 | <i>ZBTB20</i>   | chr3  | Body    | 0.8  | (0.57; 1.14) | 2.2E-01 |
| cg23724557 | <i>ZBTB20</i>   | chr3  | 5'UTR   | 0.8  | (0.57; 1.14) | 2.2E-01 |
| cg17831934 | <i>CNTNAP2</i>  | chr7  | Body    | 1.23 | (0.89; 1.7)  | 2.2E-01 |
| cg02832162 | <i>AKAP3</i>    | chr12 | Body    | 1.26 | (0.87; 1.83) | 2.2E-01 |
| cg11574072 | <i>ZNF704</i>   | chr8  | 3'UTR   | 0.82 | (0.59; 1.13) | 2.2E-01 |
| cg04799270 | <i>PTPRN2</i>   | chr7  | Body    | 0.82 | (0.6; 1.12)  | 2.2E-01 |
| cg04166393 | <i>GNA12</i>    | chr7  | TSS1500 | 1.22 | (0.89; 1.69) | 2.2E-01 |
| cg10515753 | <i>MEX3A</i>    | chr1  | 1stExon | 0.81 | (0.59; 1.13) | 2.2E-01 |
| cg18482829 | <i>ZNF704</i>   | chr8  | Body    | 0.82 | (0.6; 1.12)  | 2.2E-01 |
| cg22723098 | <i>PEX14</i>    | chr1  | Body    | 1.22 | (0.89; 1.69) | 2.2E-01 |
| cg00758412 | <i>RAP1B</i>    | chr12 | 5'UTR   | 1.56 | (0.77; 3.14) | 2.2E-01 |
| cg04569202 | <i>PTPRN2</i>   | chr7  | Body    | 0.8  | (0.56; 1.14) | 2.2E-01 |
| cg00797602 | <i>FBXO33</i>   | chr14 | TSS200  | 1.22 | (0.89; 1.67) | 2.2E-01 |
| cg18407955 | <i>PTPRN2</i>   | chr7  | Body    | 1.23 | (0.89; 1.71) | 2.2E-01 |
| cg19483307 | <i>TNR</i>      | chr1  | Body    | 0.76 | (0.48; 1.18) | 2.2E-01 |
| cg16748524 | <i>PTPRN2</i>   | chr7  | Body    | 1.23 | (0.89; 1.71) | 2.2E-01 |
| cg23097499 | <i>TNFRSF1B</i> | chr1  | TSS1500 | 1.33 | (0.85; 2.07) | 2.2E-01 |
| cg05687083 | <i>TNRC18</i>   | chr7  | Body    | 0.8  | (0.57; 1.14) | 2.2E-01 |
| cg01444720 | <i>PTPRN2</i>   | chr7  | Body    | 0.79 | (0.53; 1.15) | 2.2E-01 |
| cg10184292 | <i>FBXO34</i>   | chr14 | TSS1500 | 1.24 | (0.88; 1.73) | 2.2E-01 |
| cg10184292 | <i>FBXO34</i>   | chr14 | TSS200  | 1.24 | (0.88; 1.73) | 2.2E-01 |
| cg01731355 | <i>PTPRN2</i>   | chr7  | Body    | 0.81 | (0.58; 1.13) | 2.2E-01 |
| cg01664142 | <i>ATP8A1</i>   | chr4  | Body    | 0.83 | (0.61; 1.12) | 2.2E-01 |
| cg04782618 | <i>TENM2</i>    | chr5  | Body    | 1.33 | (0.85; 2.08) | 2.2E-01 |
| cg13749316 | <i>TSHZ3</i>    | chr19 | Body    | 0.78 | (0.53; 1.15) | 2.2E-01 |
| cg02097398 | <i>ZBTB20</i>   | chr3  | Body    | 0.77 | (0.52; 1.16) | 2.2E-01 |
| cg02097398 | <i>ZBTB20</i>   | chr3  | 5'UTR   | 0.77 | (0.52; 1.16) | 2.2E-01 |
| cg20030024 | <i>PTPRN2</i>   | chr7  | Body    | 0.81 | (0.58; 1.13) | 2.2E-01 |
| cg16068431 | <i>PTPRN2</i>   | chr7  | Body    | 1.23 | (0.88; 1.71) | 2.2E-01 |
| cg02512724 | <i>PTPRN2</i>   | chr7  | Body    | 1.21 | (0.89; 1.63) | 2.2E-01 |
| cg17392950 | <i>PTPRN2</i>   | chr7  | Body    | 0.81 | (0.58; 1.13) | 2.2E-01 |
| cg12074857 | <i>CDH11</i>    | chr16 | 5'UTR   | 0.79 | (0.54; 1.15) | 2.2E-01 |
| cg21082782 | <i>PTPRN2</i>   | chr7  | Body    | 1.2  | (0.9; 1.62)  | 2.2E-01 |
| cg25371487 | <i>RTN4</i>     | chr2  | TSS1500 | 0.82 | (0.59; 1.13) | 2.2E-01 |
| cg20272205 | <i>CCDC80</i>   | chr3  | TSS1500 | 1.22 | (0.89; 1.67) | 2.2E-01 |
| cg16264642 | <i>CTNND2</i>   | chr5  | Body    | 1.23 | (0.89; 1.7)  | 2.2E-01 |
| cg05729577 | <i>BRUNOL4</i>  | chr18 | 3'UTR   | 0.8  | (0.56; 1.14) | 2.2E-01 |
| cg25823996 | <i>PTPRN2</i>   | chr7  | Body    | 1.24 | (0.88; 1.75) | 2.2E-01 |
| cg22236143 | <i>TNR</i>      | chr1  | Body    | 1.24 | (0.88; 1.75) | 2.2E-01 |
| cg08405848 | <i>NRXN1</i>    | chr2  | Body    | 0.77 | (0.51; 1.17) | 2.2E-01 |
| cg23137807 | <i>MEIS2</i>    | chr15 | TSS200  | 0.76 | (0.48; 1.18) | 2.2E-01 |
| cg23137807 | <i>MEIS2</i>    | chr15 | TSS1500 | 0.76 | (0.48; 1.18) | 2.2E-01 |
| cg02578162 | <i>CREBBP</i>   | chr16 | Body    | 1.23 | (0.88; 1.71) | 2.2E-01 |
| cg17856083 | <i>POU2F1</i>   | chr1  | 5'UTR   | 0.81 | (0.58; 1.14) | 2.2E-01 |
| cg04498014 | <i>TNRC6C</i>   | chr17 | 5'UTR   | 1.23 | (0.88; 1.72) | 2.2E-01 |
| cg13137809 | <i>GNA12</i>    | chr7  | 3'UTR   | 1.26 | (0.87; 1.82) | 2.2E-01 |
| cg20326248 | <i>TNFRSF19</i> | chr13 | Body    | 0.81 | (0.58; 1.14) | 2.2E-01 |
| cg20332289 | <i>MBD5</i>     | chr2  | 5'UTR   | 1.23 | (0.88; 1.7)  | 2.2E-01 |
| cg05407582 | <i>PDE8A</i>    | chr15 | Body    | 1.31 | (0.85; 2.02) | 2.2E-01 |
| cg16525066 | <i>CDH11</i>    | chr16 | 5'UTR   | 1.22 | (0.89; 1.68) | 2.2E-01 |
| cg26995992 | <i>FBXO31</i>   | chr16 | Body    | 0.81 | (0.58; 1.13) | 2.2E-01 |
| cg26995992 | <i>FBXO31</i>   | chr16 | TSS1500 | 0.81 | (0.58; 1.13) | 2.2E-01 |
| cg21928707 | <i>FBXO36</i>   | chr2  | Body    | 0.75 | (0.48; 1.19) | 2.2E-01 |
| cg04918002 | <i>FBXO31</i>   | chr16 | Body    | 0.78 | (0.53; 1.16) | 2.2E-01 |
| cg10777461 | <i>PEX14</i>    | chr1  | Body    | 0.74 | (0.46; 1.2)  | 2.2E-01 |
| cg04254119 | <i>AKAP3</i>    | chr12 | 5'UTR   | 0.81 | (0.58; 1.13) | 2.2E-01 |



|              |         |       |         |      |              |         |
|--------------|---------|-------|---------|------|--------------|---------|
| cg04254119   | AKAP3   | chr12 | 1stExon | 0.81 | (0.58; 1.13) | 2.2E-01 |
| cg03105681   | PTPRN2  | chr7  | Body    | 1.22 | (0.89; 1.67) | 2.2E-01 |
| cg03555203   | TSHZ3   | chr19 | Body    | 1.24 | (0.88; 1.74) | 2.2E-01 |
| cg25574965   | DCUN1D4 | chr4  | Body    | 1.19 | (0.9; 1.58)  | 2.2E-01 |
| cg18796520   | NDUFA9  | chr12 | TSS200  | 1.25 | (0.87; 1.79) | 2.2E-01 |
| cg00104353   | PTPRN2  | chr7  | Body    | 0.83 | (0.61; 1.12) | 2.2E-01 |
| cg11742016   | ATP8A1  | chr4  | Body    | 0.8  | (0.56; 1.14) | 2.2E-01 |
| cg12823171   | WVOX    | chr16 | Body    | 0.79 | (0.54; 1.15) | 2.2E-01 |
| cg13409070   | PTPRN2  | chr7  | Body    | 1.24 | (0.88; 1.74) | 2.2E-01 |
| cg24122124   | PTPRS   | chr19 | 5'UTR   | 1.26 | (0.87; 1.83) | 2.2E-01 |
| cg22443839   | CDH13   | chr16 | Body    | 1.22 | (0.88; 1.7)  | 2.2E-01 |
| cg06742159   | AKAP13  | chr15 | TSS1500 | 1.27 | (0.86; 1.87) | 2.2E-01 |
| cg11251200   | PTPRN2  | chr7  | Body    | 1.21 | (0.89; 1.65) | 2.2E-01 |
| ch.1.893623F | ARID1A  | chr1  | Body    | 0.83 | (0.61; 1.12) | 2.2E-01 |
| cg12376168   | PTPRS   | chr19 | Body    | 1.25 | (0.87; 1.8)  | 2.2E-01 |
| cg21534299   | ERI3    | chr1  | TSS1500 | 0.81 | (0.58; 1.14) | 2.2E-01 |
| cg13555063   | PTPRN2  | chr7  | Body    | 1.24 | (0.88; 1.77) | 2.2E-01 |
| cg16514212   | PTPRN2  | chr7  | Body    | 1.26 | (0.87; 1.81) | 2.2E-01 |
| cg24752353   | AKAP13  | chr15 | Body    | 0.78 | (0.52; 1.16) | 2.2E-01 |
| cg09641955   | CACNA1C | chr12 | Body    | 1.21 | (0.89; 1.65) | 2.2E-01 |
| cg03411554   | CDH13   | chr16 | Body    | 1.21 | (0.89; 1.64) | 2.2E-01 |
| cg15507719   | BRUNOL4 | chr18 | Body    | 0.81 | (0.58; 1.13) | 2.2E-01 |
| cg01381829   | TNRC6B  | chr22 | Body    | 1.36 | (0.83; 2.24) | 2.2E-01 |
| cg01381829   | TNRC6B  | chr22 | TSS1500 | 1.36 | (0.83; 2.24) | 2.2E-01 |
| cg15430743   | NOL4    | chr18 | Body    | 0.82 | (0.59; 1.13) | 2.2E-01 |
| cg14001157   | PTPRN2  | chr7  | Body    | 0.8  | (0.57; 1.14) | 2.2E-01 |
| cg13074795   | ATF7    | chr12 | TSS1500 | 1.21 | (0.89; 1.64) | 2.2E-01 |
| cg13074795   | ATF7    | chr12 | 5'UTR   | 1.21 | (0.89; 1.64) | 2.2E-01 |
| cg26919387   | PEX14   | chr1  | Body    | 1.23 | (0.88; 1.72) | 2.2E-01 |
| cg20164016   | TNR     | chr1  | 5'UTR   | 0.82 | (0.59; 1.13) | 2.2E-01 |
| cg05147654   | PTPRN2  | chr7  | Body    | 0.82 | (0.6; 1.13)  | 2.2E-01 |
| cg25330725   | PTPRN2  | chr7  | Body    | 1.2  | (0.89; 1.62) | 2.2E-01 |
| cg26500063   | MEX3A   | chr1  | TSS1500 | 0.8  | (0.57; 1.14) | 2.3E-01 |
| cg18712752   | PTPRN2  | chr7  | Body    | 0.82 | (0.59; 1.13) | 2.3E-01 |
| cg11575295   | PTPRN2  | chr7  | Body    | 0.81 | (0.58; 1.14) | 2.3E-01 |
| cg00293128   | PTPRN2  | chr7  | Body    | 0.8  | (0.56; 1.15) | 2.3E-01 |
| cg24146776   | ZBTB20  | chr3  | 5'UTR   | 0.79 | (0.54; 1.16) | 2.3E-01 |
| cg06481656   | CDH13   | chr16 | 5'UTR   | 0.77 | (0.51; 1.17) | 2.3E-01 |
| cg06481656   | CDH13   | chr16 | Body    | 0.77 | (0.51; 1.17) | 2.3E-01 |
| cg20248758   | TDRP    | chr8  | Body    | 0.74 | (0.46; 1.2)  | 2.3E-01 |
| cg21657631   | CACNA1C | chr12 | Body    | 0.69 | (0.37; 1.26) | 2.3E-01 |
| cg24422530   | CDH13   | chr16 | 5'UTR   | 1.29 | (0.85; 1.97) | 2.3E-01 |
| cg24422530   | CDH13   | chr16 | Body    | 1.29 | (0.85; 1.97) | 2.3E-01 |
| cg23333125   | GNA12   | chr7  | Body    | 0.79 | (0.55; 1.15) | 2.3E-01 |
| cg23333125   | GNA12   | chr7  | TSS1500 | 0.79 | (0.55; 1.15) | 2.3E-01 |
| cg10542336   | PTPRN2  | chr7  | Body    | 0.84 | (0.63; 1.12) | 2.3E-01 |
| cg09882209   | ZBTB20  | chr3  | Body    | 0.81 | (0.57; 1.14) | 2.3E-01 |
| cg12165899   | FBXO31  | chr16 | 5'UTR   | 0.83 | (0.62; 1.12) | 2.3E-01 |
| cg12165899   | FBXO31  | chr16 | TSS1500 | 0.83 | (0.62; 1.12) | 2.3E-01 |
| cg10036016   | CDH13   | chr16 | Body    | 0.79 | (0.55; 1.15) | 2.3E-01 |
| cg00819163   | PTPRS   | chr19 | TSS200  | 0.84 | (0.63; 1.12) | 2.3E-01 |
| cg03359183   | DACH1   | chr13 | Body    | 0.82 | (0.59; 1.13) | 2.3E-01 |
| cg05898629   | CREBBP  | chr16 | Body    | 0.82 | (0.59; 1.13) | 2.3E-01 |
| cg17662584   | TNRC6B  | chr22 | TSS200  | 1.3  | (0.85; 1.98) | 2.3E-01 |
| cg12911428   | NOL4    | chr18 | TSS1500 | 0.79 | (0.53; 1.16) | 2.3E-01 |
| cg16248866   | MBD5    | chr2  | 5'UTR   | 1.23 | (0.88; 1.73) | 2.3E-01 |
| cg15475412   | ACVR2A  | chr2  | 5'UTR   | 0.82 | (0.6; 1.13)  | 2.3E-01 |
| cg15475412   | ACVR2A  | chr2  | TSS1500 | 0.82 | (0.6; 1.13)  | 2.3E-01 |
| cg15475412   | ACVR2A  | chr2  | 1stExon | 0.82 | (0.6; 1.13)  | 2.3E-01 |
| cg18511007   | COL1A2  | chr7  | TSS200  | 0.78 | (0.53; 1.16) | 2.3E-01 |
| cg14069819   | DMXL2   | chr15 | ExonBnd | 0.8  | (0.56; 1.15) | 2.3E-01 |



|            |                 |       |         |      |              |         |
|------------|-----------------|-------|---------|------|--------------|---------|
| cg14069819 | <i>DMXL2</i>    | chr15 | Body    | 0.8  | (0.56; 1.15) | 2.3E-01 |
| cg00730549 | <i>TNRC18</i>   | chr7  | Body    | 0.81 | (0.58; 1.14) | 2.3E-01 |
| cg25856663 | <i>CPEB1</i>    | chr15 | TSS1500 | 0.8  | (0.56; 1.15) | 2.3E-01 |
| cg25906770 | <i>PTPRN2</i>   | chr7  | Body    | 1.2  | (0.89; 1.61) | 2.3E-01 |
| cg25198612 | <i>SUGCT</i>    | chr7  | Body    | 0.65 | (0.33; 1.31) | 2.3E-01 |
| cg02382373 | <i>PTPRS</i>    | chr19 | 5'UTR   | 1.27 | (0.86; 1.88) | 2.3E-01 |
| cg16747052 | <i>PTPRN2</i>   | chr7  | Body    | 0.79 | (0.54; 1.16) | 2.3E-01 |
| cg00572058 | <i>UNC80</i>    | chr2  | Body    | 0.81 | (0.58; 1.14) | 2.3E-01 |
| cg08917023 | <i>CREBBP</i>   | chr16 | Body    | 1.21 | (0.89; 1.65) | 2.3E-01 |
| cg18477928 | <i>CUX2</i>     | chr12 | Body    | 0.8  | (0.56; 1.15) | 2.3E-01 |
| cg05920196 | <i>TAOK3</i>    | chr12 | 5'UTR   | 1.25 | (0.87; 1.78) | 2.3E-01 |
| cg02667335 | <i>CHFR</i>     | chr12 | TSS1500 | 1.23 | (0.88; 1.74) | 2.3E-01 |
| cg25485235 | <i>WVOX</i>     | chr16 | Body    | 1.39 | (0.81; 2.36) | 2.3E-01 |
| cg03899215 | <i>PTPRN2</i>   | chr7  | Body    | 1.2  | (0.89; 1.61) | 2.3E-01 |
| cg20754430 | <i>PTPRN2</i>   | chr7  | Body    | 1.21 | (0.89; 1.66) | 2.3E-01 |
| cg04694534 | <i>PTPRN2</i>   | chr7  | Body    | 0.74 | (0.45; 1.21) | 2.3E-01 |
| cg09737793 | <i>CUX2</i>     | chr12 | Body    | 0.79 | (0.54; 1.16) | 2.3E-01 |
| cg22346702 | <i>NOL4</i>     | chr18 | 5'UTR   | 0.78 | (0.52; 1.17) | 2.3E-01 |
| cg22346702 | <i>NOL4</i>     | chr18 | Body    | 0.78 | (0.52; 1.17) | 2.3E-01 |
| cg02004401 | <i>GNA12</i>    | chr7  | 3'UTR   | 1.21 | (0.88; 1.66) | 2.3E-01 |
| cg01745428 | <i>NOL4L</i>    | chr20 | Body    | 1.24 | (0.87; 1.76) | 2.3E-01 |
| cg14969015 | <i>ERI3</i>     | chr1  | Body    | 1.24 | (0.87; 1.77) | 2.3E-01 |
| cg02839273 | <i>PDE8A</i>    | chr15 | 5'UTR   | 1.24 | (0.87; 1.76) | 2.3E-01 |
| cg02839273 | <i>PDE8A</i>    | chr15 | 1stExon | 1.24 | (0.87; 1.76) | 2.3E-01 |
| cg20825817 | <i>TNR</i>      | chr1  | Body    | 1.22 | (0.88; 1.69) | 2.3E-01 |
| cg13974768 | <i>POU2F1</i>   | chr1  | 5'UTR   | 1.21 | (0.89; 1.64) | 2.3E-01 |
| cg04140663 | <i>CPEB1</i>    | chr15 | Body    | 1.23 | (0.88; 1.73) | 2.3E-01 |
| cg00106757 | <i>ATF7IP2</i>  | chr16 | Body    | 0.81 | (0.58; 1.14) | 2.3E-01 |
| cg26349416 | <i>ERI3</i>     | chr1  | Body    | 0.8  | (0.56; 1.15) | 2.3E-01 |
| cg02031245 | <i>CSMD2</i>    | chr1  | Body    | 0.81 | (0.58; 1.14) | 2.3E-01 |
| cg07489121 | <i>FBXO34</i>   | chr14 | 5'UTR   | 1.23 | (0.88; 1.72) | 2.3E-01 |
| cg04246957 | <i>PTPRN2</i>   | chr7  | Body    | 0.83 | (0.61; 1.13) | 2.3E-01 |
| cg20385686 | <i>ARID1A</i>   | chr1  | Body    | 1.24 | (0.87; 1.77) | 2.3E-01 |
| cg17018649 | <i>FSTL1</i>    | chr3  | TSS1500 | 0.8  | (0.56; 1.15) | 2.3E-01 |
| cg01504567 | <i>CPEB1</i>    | chr15 | Body    | 1.21 | (0.88; 1.66) | 2.3E-01 |
| cg01504567 | <i>CPEB1</i>    | chr15 | 5'UTR   | 1.21 | (0.88; 1.66) | 2.3E-01 |
| cg06213317 | <i>PTPRS</i>    | chr19 | Body    | 0.76 | (0.48; 1.19) | 2.3E-01 |
| cg10024799 | <i>CACNA1C</i>  | chr12 | Body    | 1.2  | (0.89; 1.61) | 2.3E-01 |
| cg14934396 | <i>RECQL5</i>   | chr17 | Body    | 1.39 | (0.81; 2.37) | 2.3E-01 |
| cg12991594 | <i>TENM2</i>    | chr5  | Body    | 1.28 | (0.85; 1.91) | 2.3E-01 |
| cg00983086 | <i>PTPRN2</i>   | chr7  | Body    | 0.8  | (0.55; 1.16) | 2.3E-01 |
| cg01597400 | <i>PTPRN2</i>   | chr7  | Body    | 0.83 | (0.61; 1.13) | 2.3E-01 |
| cg10917619 | <i>NRXN1</i>    | chr2  | 5'UTR   | 1.23 | (0.88; 1.73) | 2.3E-01 |
| cg13357408 | <i>PTPRN2</i>   | chr7  | Body    | 0.83 | (0.62; 1.12) | 2.3E-01 |
| cg16883353 | <i>ATP8A1</i>   | chr4  | Body    | 1.25 | (0.87; 1.8)  | 2.3E-01 |
| cg00590960 | <i>BRUNOL4</i>  | chr18 | TSS1500 | 0.8  | (0.55; 1.16) | 2.3E-01 |
| cg02623400 | <i>ELAVL4</i>   | chr1  | 1stExon | 0.7  | (0.4; 1.25)  | 2.3E-01 |
| cg02623400 | <i>ELAVL4</i>   | chr1  | 5'UTR   | 0.7  | (0.4; 1.25)  | 2.3E-01 |
| cg16885368 | <i>PTPRN2</i>   | chr7  | Body    | 1.4  | (0.8; 2.43)  | 2.3E-01 |
| cg16433587 | <i>PTPRN2</i>   | chr7  | Body    | 1.22 | (0.88; 1.7)  | 2.3E-01 |
| cg01559619 | <i>POU2F1</i>   | chr1  | Body    | 0.8  | (0.56; 1.15) | 2.3E-01 |
| cg09320702 | <i>RECQL5</i>   | chr17 | Body    | 1.23 | (0.87; 1.75) | 2.3E-01 |
| cg16823620 | <i>COL5A2</i>   | chr2  | Body    | 1.29 | (0.85; 1.96) | 2.3E-01 |
| cg14985741 | <i>TNFRSF19</i> | chr13 | 3'UTR   | 0.79 | (0.53; 1.17) | 2.4E-01 |
| cg24504442 | <i>MEIS2</i>    | chr15 | 5'UTR   | 0.8  | (0.56; 1.15) | 2.4E-01 |
| cg24504442 | <i>MEIS2</i>    | chr15 | 1stExon | 0.8  | (0.56; 1.15) | 2.4E-01 |
| cg24504442 | <i>MEIS2</i>    | chr15 | TSS200  | 0.8  | (0.56; 1.15) | 2.4E-01 |
| cg24504442 | <i>MEIS2</i>    | chr15 | TSS1500 | 0.8  | (0.56; 1.15) | 2.4E-01 |
| cg06642158 | <i>CREBBP</i>   | chr16 | Body    | 0.81 | (0.57; 1.15) | 2.4E-01 |
| cg14527439 | <i>PTPRN2</i>   | chr7  | Body    | 0.81 | (0.58; 1.14) | 2.4E-01 |
| cg15937325 | <i>PTPRU</i>    | chr1  | Body    | 1.29 | (0.85; 1.96) | 2.4E-01 |



|            |         |       |         |      |              |         |
|------------|---------|-------|---------|------|--------------|---------|
| cg13685506 | CTNND2  | chr5  | Body    | 1.31 | (0.84; 2.03) | 2.4E-01 |
| cg21052788 | PTPRN2  | chr7  | Body    | 0.68 | (0.36; 1.28) | 2.4E-01 |
| cg11863954 | CUX2    | chr12 | Body    | 0.8  | (0.56; 1.15) | 2.4E-01 |
| cg14296394 | DMXL2   | chr15 | Body    | 0.79 | (0.54; 1.16) | 2.4E-01 |
| cg17620230 | ATF7    | chr12 | ExonBnd | 0.82 | (0.6; 1.14)  | 2.4E-01 |
| cg17620230 | ATF7    | chr12 | Body    | 0.82 | (0.6; 1.14)  | 2.4E-01 |
| cg08361955 | CACNA1C | chr12 | Body    | 0.8  | (0.55; 1.16) | 2.4E-01 |
| cg26820118 | CNTNAP2 | chr7  | Body    | 0.81 | (0.57; 1.15) | 2.4E-01 |
| cg26840849 | CTDSPL2 | chr15 | Body    | 1.25 | (0.87; 1.8)  | 2.4E-01 |
| cg06452248 | PTPRN2  | chr7  | Body    | 1.25 | (0.86; 1.8)  | 2.4E-01 |
| cg19422369 | GNA12   | chr7  | Body    | 1.22 | (0.88; 1.69) | 2.4E-01 |
| cg07942010 | ALCAM   | chr3  | Body    | 0.81 | (0.58; 1.15) | 2.4E-01 |
| cg13709778 | UBE2E2  | chr3  | Body    | 0.82 | (0.59; 1.14) | 2.4E-01 |
| cg25270819 | ZFP91   | chr11 | Body    | 1.45 | (0.78; 2.68) | 2.4E-01 |
| cg02525930 | DNAI2   | chr17 | TSS200  | 0.79 | (0.54; 1.16) | 2.4E-01 |
| cg13492553 | WWOX    | chr16 | Body    | 1.2  | (0.89; 1.62) | 2.4E-01 |
| cg22638268 | FBXO31  | chr16 | Body    | 1.18 | (0.9; 1.55)  | 2.4E-01 |
| cg23285761 | DDHD2   | chr8  | 5'UTR   | 0.82 | (0.59; 1.14) | 2.4E-01 |
| cg23285761 | DDHD2   | chr8  | TSS200  | 0.82 | (0.59; 1.14) | 2.4E-01 |
| cg24578336 | FBXO33  | chr14 | TSS200  | 0.83 | (0.61; 1.13) | 2.4E-01 |
| cg09193751 | PTPRN2  | chr7  | Body    | 0.82 | (0.58; 1.14) | 2.4E-01 |
| cg27562595 | CNTNAP2 | chr7  | Body    | 0.83 | (0.61; 1.13) | 2.4E-01 |
| cg03920522 | COL1A2  | chr7  | Body    | 0.8  | (0.55; 1.16) | 2.4E-01 |
| cg11206084 | PTPRN2  | chr7  | Body    | 0.83 | (0.61; 1.13) | 2.4E-01 |
| cg05214808 | CACNA1C | chr12 | Body    | 0.76 | (0.47; 1.2)  | 2.4E-01 |
| cg12061329 | CDH13   | chr16 | 5'UTR   | 1.24 | (0.87; 1.76) | 2.4E-01 |
| cg12061329 | CDH13   | chr16 | Body    | 1.24 | (0.87; 1.76) | 2.4E-01 |
| cg03080505 | FBXO36  | chr2  | Body    | 1.26 | (0.86; 1.84) | 2.4E-01 |
| cg23068476 | CACNA1C | chr12 | Body    | 0.8  | (0.56; 1.16) | 2.4E-01 |
| cg06179179 | PTPRN2  | chr7  | Body    | 0.83 | (0.61; 1.13) | 2.4E-01 |
| cg15473007 | TNRC6A  | chr16 | Body    | 1.32 | (0.83; 2.08) | 2.4E-01 |
| cg03900492 | PTPRN2  | chr7  | Body    | 0.73 | (0.44; 1.23) | 2.4E-01 |
| cg26171490 | ZBTB20  | chr3  | 5'UTR   | 1.25 | (0.86; 1.8)  | 2.4E-01 |
| cg11284316 | UNC80   | chr2  | TSS1500 | 0.77 | (0.5; 1.19)  | 2.4E-01 |
| cg20984904 | PTPRN2  | chr7  | Body    | 1.27 | (0.85; 1.88) | 2.4E-01 |
| cg16254309 | CNTNAP2 | chr7  | Body    | 0.75 | (0.46; 1.21) | 2.4E-01 |
| cg20924082 | SUGCT   | chr7  | Body    | 1.26 | (0.86; 1.86) | 2.4E-01 |
| cg24701780 | PTPRN2  | chr7  | Body    | 0.8  | (0.56; 1.16) | 2.4E-01 |
| cg09547314 | PTPRS   | chr19 | Body    | 0.83 | (0.61; 1.13) | 2.4E-01 |
| cg04496254 | CUX2    | chr12 | Body    | 0.77 | (0.5; 1.19)  | 2.4E-01 |
| cg11638352 | PDE8A   | chr15 | 5'UTR   | 0.8  | (0.54; 1.17) | 2.4E-01 |
| cg11638352 | PDE8A   | chr15 | Body    | 0.8  | (0.54; 1.17) | 2.4E-01 |
| cg17352023 | CUX2    | chr12 | Body    | 0.64 | (0.3; 1.35)  | 2.4E-01 |
| cg16340117 | PTPRN2  | chr7  | Body    | 0.84 | (0.63; 1.12) | 2.4E-01 |
| cg03280245 | RTN4RL2 | chr11 | Body    | 0.81 | (0.56; 1.15) | 2.4E-01 |
| cg11588907 | NOL4    | chr18 | TSS1500 | 1.24 | (0.87; 1.78) | 2.4E-01 |
| cg11588907 | NOL4    | chr18 | Body    | 1.24 | (0.87; 1.78) | 2.4E-01 |
| cg15815419 | ATP6V0C | chr16 | TSS200  | 1.25 | (0.86; 1.8)  | 2.4E-01 |
| cg11757337 | PTPRN2  | chr7  | Body    | 1.26 | (0.86; 1.84) | 2.4E-01 |
| cg16385733 | TENM2   | chr5  | Body    | 0.8  | (0.55; 1.16) | 2.4E-01 |
| cg00175441 | TNRC6C  | chr17 | Body    | 1.22 | (0.88; 1.69) | 2.4E-01 |
| cg24374900 | PDE8A   | chr15 | TSS1500 | 0.74 | (0.44; 1.23) | 2.4E-01 |
| cg02319036 | WWOX    | chr16 | Body    | 0.82 | (0.59; 1.14) | 2.4E-01 |
| cg20361664 | TAOK3   | chr12 | Body    | 0.77 | (0.5; 1.19)  | 2.4E-01 |
| cg27420590 | PTPRS   | chr19 | 3'UTR   | 1.22 | (0.88; 1.69) | 2.4E-01 |
| cg22287067 | NOL4    | chr18 | TSS200  | 0.78 | (0.52; 1.18) | 2.4E-01 |
| cg23554150 | NDUFA9  | chr12 | Body    | 0.82 | (0.58; 1.15) | 2.4E-01 |
| cg23554150 | AKAP3   | chr12 | TSS1500 | 0.82 | (0.58; 1.15) | 2.4E-01 |
| cg26982161 | CDH13   | chr16 | Body    | 0.84 | (0.63; 1.12) | 2.4E-01 |
| cg24063658 | PTPRN2  | chr7  | Body    | 0.84 | (0.62; 1.13) | 2.4E-01 |
| cg10652646 | MEIS2   | chr15 | TSS1500 | 1.27 | (0.85; 1.88) | 2.4E-01 |



|            |              |       |         |      |              |         |
|------------|--------------|-------|---------|------|--------------|---------|
| cg02391633 | TNRC6A       | chr16 | Body    | 0.81 | (0.56; 1.16) | 2.4E-01 |
| cg15397593 | CACNA1C      | chr12 | Body    | 1.21 | (0.88; 1.68) | 2.4E-01 |
| cg10797798 | PEX14        | chr1  | Body    | 0.79 | (0.53; 1.17) | 2.4E-01 |
| cg08528096 | CHCHD6       | chr3  | Body    | 1.22 | (0.88; 1.7)  | 2.4E-01 |
| cg13716536 | SLC16A9      | chr10 | Body    | 1.34 | (0.82; 2.18) | 2.4E-01 |
| cg03123091 | ARID1A       | chr1  | Body    | 0.81 | (0.57; 1.15) | 2.4E-01 |
| cg02626269 | FBXO31       | chr16 | Body    | 1.27 | (0.85; 1.9)  | 2.4E-01 |
| cg23897941 | CACNA1C      | chr12 | Body    | 1.27 | (0.85; 1.88) | 2.4E-01 |
| cg02478172 | PTPRN2       | chr7  | Body    | 0.81 | (0.57; 1.15) | 2.4E-01 |
| cg00105060 | CNTNAP2      | chr7  | Body    | 0.75 | (0.46; 1.22) | 2.4E-01 |
| cg16943030 | TENM2        | chr5  | Body    | 1.19 | (0.89; 1.6)  | 2.4E-01 |
| cg03236992 | WVOX         | chr16 | TSS1500 | 0.83 | (0.61; 1.14) | 2.4E-01 |
| cg14832998 | PTPRN2       | chr7  | Body    | 1.21 | (0.88; 1.68) | 2.4E-01 |
| cg25366140 | PTPRN2       | chr7  | Body    | 0.84 | (0.63; 1.12) | 2.4E-01 |
| cg25378096 | SRSF10       | chr1  | Body    | 0.79 | (0.54; 1.17) | 2.4E-01 |
| cg25378096 | SRSF10       | chr1  | ExonBnd | 0.79 | (0.54; 1.17) | 2.4E-01 |
| cg01674374 | TAOK3        | chr12 | 5'UTR   | 0.77 | (0.49; 1.2)  | 2.4E-01 |
| cg09890339 | CACNA1C      | chr12 | Body    | 0.74 | (0.44; 1.23) | 2.4E-01 |
| cg12001457 | NRXN1        | chr2  | Body    | 0.81 | (0.57; 1.16) | 2.4E-01 |
| cg17286476 | PTPRN2       | chr7  | Body    | 1.19 | (0.89; 1.59) | 2.4E-01 |
| cg20907124 | SCAF8        | chr6  | Body    | 1.22 | (0.87; 1.71) | 2.4E-01 |
| cg14863265 | GNA12        | chr7  | Body    | 1.23 | (0.87; 1.75) | 2.4E-01 |
| cg01873143 | TNRC18       | chr7  | Body    | 0.84 | (0.62; 1.13) | 2.4E-01 |
| cg16762439 | LOC101928700 | chr7  | TSS1500 | 0.75 | (0.46; 1.22) | 2.4E-01 |
| cg16762439 | CNTNAP2      | chr7  | Body    | 0.75 | (0.46; 1.22) | 2.4E-01 |
| cg13611347 | NOL4         | chr18 | Body    | 0.77 | (0.5; 1.19)  | 2.4E-01 |
| cg15692323 | PTPRN2       | chr7  | Body    | 1.22 | (0.87; 1.7)  | 2.4E-01 |
| cg19265600 | TNRC18       | chr7  | Body    | 1.24 | (0.86; 1.78) | 2.4E-01 |
| cg10424969 | WVOX         | chr16 | Body    | 1.21 | (0.88; 1.68) | 2.4E-01 |
| cg22463563 | TNRC6A       | chr16 | Body    | 0.82 | (0.59; 1.15) | 2.5E-01 |
| cg04511291 | PTPRN2       | chr7  | Body    | 0.83 | (0.61; 1.13) | 2.5E-01 |
| cg07557423 | ATP8A1       | chr4  | Body    | 0.81 | (0.57; 1.16) | 2.5E-01 |
| cg09104245 | SUGCT        | chr7  | Body    | 1.21 | (0.88; 1.68) | 2.5E-01 |
| cg14306734 | BRUNOL4      | chr18 | Body    | 1.26 | (0.86; 1.84) | 2.5E-01 |
| cg17810111 | NRXN1        | chr2  | Body    | 0.81 | (0.56; 1.16) | 2.5E-01 |
| cg20634514 | ERI3         | chr1  | Body    | 0.63 | (0.29; 1.37) | 2.5E-01 |
| cg01682050 | WVOX         | chr16 | Body    | 0.81 | (0.58; 1.15) | 2.5E-01 |
| cg02773779 | PTPRN2       | chr7  | Body    | 1.2  | (0.88; 1.64) | 2.5E-01 |
| cg18231005 | TNFRSF1B     | chr1  | Body    | 1.22 | (0.87; 1.7)  | 2.5E-01 |
| cg02369113 | PTPRN2       | chr7  | Body    | 1.22 | (0.87; 1.7)  | 2.5E-01 |
| cg26536253 | FBXO31       | chr16 | Body    | 1.23 | (0.86; 1.76) | 2.5E-01 |
| cg26536253 | FBXO31       | chr16 | 5'UTR   | 1.23 | (0.86; 1.76) | 2.5E-01 |
| cg06015733 | DDHD2        | chr8  | 5'UTR   | 1.27 | (0.85; 1.9)  | 2.5E-01 |
| cg23390118 | CACNA1C      | chr12 | Body    | 1.28 | (0.84; 1.94) | 2.5E-01 |
| cg10898184 | PTPRN2       | chr7  | Body    | 0.81 | (0.57; 1.16) | 2.5E-01 |
| cg06153985 | RNU5E-1      | chr5  | Body    | 0.82 | (0.6; 1.14)  | 2.5E-01 |
| cg13372513 | PTPRN2       | chr7  | Body    | 1.21 | (0.88; 1.67) | 2.5E-01 |
| cg11060759 | PTPRU        | chr1  | Body    | 0.83 | (0.61; 1.13) | 2.5E-01 |
| cg06124579 | ELAVL4       | chr1  | TSS1500 | 0.82 | (0.59; 1.14) | 2.5E-01 |
| cg23451678 | CCDC80       | chr3  | 3'UTR   | 0.82 | (0.59; 1.15) | 2.5E-01 |
| cg12383142 | ELAVL4       | chr1  | ExonBnd | 1.29 | (0.84; 1.97) | 2.5E-01 |
| cg12383142 | ELAVL4       | chr1  | Body    | 1.29 | (0.84; 1.97) | 2.5E-01 |
| cg08013355 | TENM2        | chr5  | Body    | 0.8  | (0.55; 1.17) | 2.5E-01 |
| cg23545098 | CREBBP       | chr16 | TSS1500 | 1.27 | (0.85; 1.92) | 2.5E-01 |
| cg14654134 | ZBTB20       | chr3  | 5'UTR   | 0.78 | (0.51; 1.19) | 2.5E-01 |
| cg16889627 | MBD5         | chr2  | 5'UTR   | 1.24 | (0.86; 1.78) | 2.5E-01 |
| cg01031400 | TNFRSF10D    | chr8  | 5'UTR   | 0.81 | (0.57; 1.16) | 2.5E-01 |
| cg01031400 | TNFRSF10D    | chr8  | 1stExon | 0.81 | (0.57; 1.16) | 2.5E-01 |
| cg05679795 | ATF7         | chr12 | 1stExon | 1.21 | (0.88; 1.67) | 2.5E-01 |
| cg05679795 | ATF7         | chr12 | 5'UTR   | 1.21 | (0.88; 1.67) | 2.5E-01 |
| cg11770113 | COL5A2       | chr2  | Body    | 1.22 | (0.87; 1.72) | 2.5E-01 |



|            |                  |       |         |      |              |         |
|------------|------------------|-------|---------|------|--------------|---------|
| cg05623531 | <i>PTPRS</i>     | chr19 | Body    | 1.2  | (0.88; 1.65) | 2.5E-01 |
| cg21914526 | <i>PTPRN2</i>    | chr7  | Body    | 0.81 | (0.58; 1.15) | 2.5E-01 |
| cg09601923 | <i>DNAI2</i>     | chr17 | TSS200  | 0.83 | (0.61; 1.14) | 2.5E-01 |
| cg05421555 | <i>AKAP13</i>    | chr15 | 5'UTR   | 1.22 | (0.87; 1.71) | 2.5E-01 |
| cg10053073 | <i>RECQL5</i>    | chr17 | 3'UTR   | 1.28 | (0.84; 1.95) | 2.5E-01 |
| cg20168823 | <i>BRUNOL4</i>   | chr18 | Body    | 0.82 | (0.59; 1.15) | 2.5E-01 |
| cg17019032 | <i>SMARCD3</i>   | chr7  | ExonBnd | 1.26 | (0.85; 1.87) | 2.5E-01 |
| cg17019032 | <i>SMARCD3</i>   | chr7  | Body    | 1.26 | (0.85; 1.87) | 2.5E-01 |
| cg01591591 | <i>CREBBP</i>    | chr16 | Body    | 1.22 | (0.87; 1.73) | 2.5E-01 |
| cg25833403 | <i>DACH1</i>     | chr13 | Body    | 1.28 | (0.84; 1.94) | 2.5E-01 |
| cg22312534 | <i>ZBTB20</i>    | chr3  | Body    | 0.84 | (0.62; 1.13) | 2.5E-01 |
| cg22312534 | <i>ZBTB20</i>    | chr3  | 5'UTR   | 0.84 | (0.62; 1.13) | 2.5E-01 |
| cg11796258 | <i>TNR</i>       | chr1  | Body    | 0.83 | (0.6; 1.14)  | 2.5E-01 |
| cg06646604 | <i>PDE8A</i>     | chr15 | Body    | 0.77 | (0.49; 1.2)  | 2.5E-01 |
| cg19739098 | <i>PTPRN2</i>    | chr7  | Body    | 0.81 | (0.56; 1.16) | 2.5E-01 |
| cg27130769 | <i>TNRC18</i>    | chr7  | Body    | 1.22 | (0.87; 1.71) | 2.5E-01 |
| cg12790758 | <i>MEIS2</i>     | chr15 | Body    | 0.82 | (0.59; 1.15) | 2.5E-01 |
| cg26242818 | <i>RAP1B</i>     | chr12 | 3'UTR   | 1.25 | (0.85; 1.84) | 2.5E-01 |
| cg12413242 | <i>CACNA1C</i>   | chr12 | Body    | 0.84 | (0.62; 1.13) | 2.5E-01 |
| cg12752568 | <i>SUGCT</i>     | chr7  | Body    | 1.23 | (0.87; 1.74) | 2.5E-01 |
| cg24524634 | <i>GNA12</i>     | chr7  | Body    | 0.83 | (0.6; 1.14)  | 2.5E-01 |
| cg00863246 | <i>CACNA1C</i>   | chr12 | Body    | 0.61 | (0.27; 1.41) | 2.5E-01 |
| cg13397314 | <i>RTN4R</i>     | chr22 | TSS1500 | 1.26 | (0.85; 1.88) | 2.5E-01 |
| cg20726664 | <i>AKAP13</i>    | chr15 | Body    | 0.82 | (0.58; 1.15) | 2.5E-01 |
| cg25429984 | <i>UBE2E2</i>    | chr3  | Body    | 0.82 | (0.58; 1.15) | 2.5E-01 |
| cg05977955 | <i>CHCHD6</i>    | chr3  | Body    | 1.27 | (0.85; 1.9)  | 2.5E-01 |
| cg14697583 | <i>DNAI2</i>     | chr17 | TSS1500 | 1.39 | (0.79; 2.42) | 2.5E-01 |
| cg23229652 | <i>CACNA1C</i>   | chr12 | Body    | 1.25 | (0.86; 1.82) | 2.5E-01 |
| cg25483464 | <i>CEP350</i>    | chr1  | Body    | 1.28 | (0.84; 1.96) | 2.5E-01 |
| cg03772219 | <i>CNTNAP2</i>   | chr7  | Body    | 1.22 | (0.87; 1.7)  | 2.5E-01 |
| cg06555227 | <i>PTPRN2</i>    | chr7  | Body    | 0.78 | (0.52; 1.19) | 2.5E-01 |
| cg19099311 | <i>PTPRN2</i>    | chr7  | Body    | 0.83 | (0.61; 1.14) | 2.5E-01 |
| cg07373212 | <i>CHCHD6</i>    | chr3  | Body    | 1.21 | (0.87; 1.69) | 2.5E-01 |
| cg04064735 | <i>PTPRN2</i>    | chr7  | Body    | 0.84 | (0.62; 1.13) | 2.5E-01 |
| cg07383370 | <i>SUGCT</i>     | chr7  | Body    | 1.44 | (0.77; 2.71) | 2.5E-01 |
| cg24082339 | <i>TENM2</i>     | chr5  | Body    | 0.83 | (0.61; 1.14) | 2.5E-01 |
| cg25976504 | <i>SGIP1</i>     | chr1  | TSS200  | 0.82 | (0.58; 1.16) | 2.5E-01 |
| cg25976504 | <i>SGIP1</i>     | chr1  | TSS1500 | 0.82 | (0.58; 1.16) | 2.5E-01 |
| cg02419716 | <i>SMARCD3</i>   | chr7  | Body    | 0.84 | (0.62; 1.13) | 2.5E-01 |
| cg15605804 | <i>TNFRSF10D</i> | chr8  | Body    | 1.19 | (0.88; 1.61) | 2.5E-01 |
| cg26645635 | <i>CTDSP2</i>    | chr12 | TSS200  | 1.21 | (0.87; 1.67) | 2.5E-01 |
| cg22469841 | <i>FSTL1</i>     | chr3  | Body    | 1.27 | (0.84; 1.9)  | 2.5E-01 |
| cg27433661 | <i>PTPRN2</i>    | chr7  | Body    | 1.23 | (0.86; 1.77) | 2.5E-01 |
| cg21511969 | <i>FSTL1</i>     | chr3  | 5'UTR   | 0.83 | (0.6; 1.15)  | 2.5E-01 |
| cg21511969 | <i>FSTL1</i>     | chr3  | 1stExon | 0.83 | (0.6; 1.15)  | 2.5E-01 |
| cg10407177 | <i>BRUNOL4</i>   | chr18 | Body    | 1.28 | (0.84; 1.94) | 2.5E-01 |
| cg17096328 | <i>CNTNAP2</i>   | chr7  | Body    | 0.84 | (0.63; 1.13) | 2.5E-01 |
| cg10770132 | <i>CSMD2</i>     | chr1  | Body    | 1.24 | (0.86; 1.8)  | 2.5E-01 |
| cg02662530 | <i>MBD5</i>      | chr2  | 5'UTR   | 0.75 | (0.46; 1.23) | 2.5E-01 |
| cg22597706 | <i>CTNND2</i>    | chr5  | Body    | 0.81 | (0.57; 1.16) | 2.5E-01 |
| cg07787614 | <i>TNRC6C</i>    | chr17 | 5'UTR   | 1.24 | (0.86; 1.78) | 2.5E-01 |
| cg13972711 | <i>TNRC18</i>    | chr7  | Body    | 0.83 | (0.6; 1.15)  | 2.5E-01 |
| cg18128856 | <i>COL5A2</i>    | chr2  | Body    | 1.19 | (0.88; 1.6)  | 2.5E-01 |
| cg22970003 | <i>PTPRN2</i>    | chr7  | Body    | 1.25 | (0.85; 1.82) | 2.5E-01 |
| cg23694187 | <i>PTPRN2</i>    | chr7  | Body    | 1.2  | (0.88; 1.66) | 2.5E-01 |
| cg06815373 | <i>PTPRN2</i>    | chr7  | Body    | 0.82 | (0.58; 1.16) | 2.5E-01 |
| cg09022230 | <i>TNRC18</i>    | chr7  | Body    | 0.78 | (0.51; 1.2)  | 2.5E-01 |
| cg07019099 | <i>PTPRN2</i>    | chr7  | Body    | 1.18 | (0.89; 1.58) | 2.5E-01 |
| cg07543823 | <i>RTN4R</i>     | chr22 | Body    | 0.82 | (0.58; 1.15) | 2.5E-01 |
| cg12440927 | <i>PTPRN2</i>    | chr7  | Body    | 1.21 | (0.87; 1.68) | 2.5E-01 |
| cg02102278 | <i>TENM2</i>     | chr5  | Body    | 1.24 | (0.86; 1.78) | 2.5E-01 |



|            |                |       |         |      |              |         |
|------------|----------------|-------|---------|------|--------------|---------|
| cg08906363 | <i>PTPRN2</i>  | chr7  | Body    | 1.22 | (0.87; 1.71) | 2.6E-01 |
| cg20792744 | <i>CTDSPL2</i> | chr15 | 5'UTR   | 1.23 | (0.86; 1.77) | 2.6E-01 |
| cg22835523 | <i>PDE8A</i>   | chr15 | Body    | 1.29 | (0.83; 2.01) | 2.6E-01 |
| cg06532176 | <i>WWOX</i>    | chr16 | Body    | 1.2  | (0.88; 1.63) | 2.6E-01 |
| cg06532176 | <i>WWOX</i>    | chr16 | 3'UTR   | 1.2  | (0.88; 1.63) | 2.6E-01 |
| cg06532176 | <i>WWOX</i>    | chr16 | 1stExon | 1.2  | (0.88; 1.63) | 2.6E-01 |
| cg02399044 | <i>CACNA1C</i> | chr12 | Body    | 0.82 | (0.57; 1.16) | 2.6E-01 |
| cg13803067 | <i>TXNDC9</i>  | chr2  | 5'UTR   | 0.79 | (0.53; 1.18) | 2.6E-01 |
| cg02588098 | <i>WWOX</i>    | chr16 | Body    | 0.84 | (0.62; 1.13) | 2.6E-01 |
| cg07978494 | <i>PTPRN2</i>  | chr7  | Body    | 0.81 | (0.57; 1.16) | 2.6E-01 |
| cg02606650 | <i>TENM2</i>   | chr5  | Body    | 0.8  | (0.55; 1.18) | 2.6E-01 |
| cg18088723 | <i>AKAP13</i>  | chr15 | Body    | 1.25 | (0.85; 1.85) | 2.6E-01 |
| cg10810352 | <i>FBXO31</i>  | chr16 | TSS200  | 1.22 | (0.87; 1.72) | 2.6E-01 |
| cg10810352 | <i>FBXO31</i>  | chr16 | 5'UTR   | 1.22 | (0.87; 1.72) | 2.6E-01 |
| cg18397864 | <i>BRUNOL4</i> | chr18 | 1stExon | 1.24 | (0.86; 1.8)  | 2.6E-01 |
| cg12240847 | <i>CSMD2</i>   | chr1  | Body    | 0.82 | (0.58; 1.16) | 2.6E-01 |
| cg05404890 | <i>TNRC6A</i>  | chr16 | Body    | 0.83 | (0.6; 1.14)  | 2.6E-01 |
| cg25356743 | <i>CSMD2</i>   | chr1  | Body    | 1.26 | (0.84; 1.89) | 2.6E-01 |
| cg25258258 | <i>PTPRN2</i>  | chr7  | Body    | 1.22 | (0.87; 1.72) | 2.6E-01 |
| cg05194552 | <i>CREBBP</i>  | chr16 | Body    | 0.82 | (0.59; 1.15) | 2.6E-01 |
| cg19645258 | <i>AKAP13</i>  | chr15 | Body    | 0.82 | (0.58; 1.15) | 2.6E-01 |
| cg22136038 | <i>PTPRN2</i>  | chr7  | Body    | 1.26 | (0.85; 1.87) | 2.6E-01 |
| cg25382025 | <i>PTPRS</i>   | chr19 | Body    | 1.21 | (0.87; 1.68) | 2.6E-01 |
| cg17684850 | <i>CHCHD6</i>  | chr3  | Body    | 1.2  | (0.88; 1.65) | 2.6E-01 |
| cg03168108 | <i>NRXN1</i>   | chr2  | TSS200  | 1.23 | (0.86; 1.76) | 2.6E-01 |
| cg04362902 | <i>FBXO11</i>  | chr2  | Body    | 0.76 | (0.47; 1.22) | 2.6E-01 |
| cg02369188 | <i>PTPRN2</i>  | chr7  | Body    | 1.2  | (0.88; 1.64) | 2.6E-01 |
| cg13057030 | <i>CUX2</i>    | chr12 | Body    | 1.2  | (0.88; 1.64) | 2.6E-01 |
| cg25018884 | <i>CACNA1C</i> | chr12 | Body    | 0.76 | (0.47; 1.23) | 2.6E-01 |
| cg02755131 | <i>CDH13</i>   | chr16 | Body    | 1.2  | (0.88; 1.64) | 2.6E-01 |
| cg05511613 | <i>TNRC18</i>  | chr7  | Body    | 0.83 | (0.59; 1.15) | 2.6E-01 |
| cg14784405 | <i>CDH13</i>   | chr16 | Body    | 0.82 | (0.58; 1.16) | 2.6E-01 |
| cg07964527 | <i>PDE8A</i>   | chr15 | Body    | 1.25 | (0.85; 1.85) | 2.6E-01 |
| cg18041207 | <i>DACH1</i>   | chr13 | TSS200  | 0.81 | (0.57; 1.16) | 2.6E-01 |
| cg03927644 | <i>ZBTB20</i>  | chr3  | Body    | 0.83 | (0.61; 1.14) | 2.6E-01 |
| cg03927644 | <i>ZBTB20</i>  | chr3  | 5'UTR   | 0.83 | (0.61; 1.14) | 2.6E-01 |
| cg02847074 | <i>CUX2</i>    | chr12 | Body    | 0.8  | (0.54; 1.18) | 2.6E-01 |
| cg22635363 | <i>CNTNAP2</i> | chr7  | Body    | 1.29 | (0.83; 2)    | 2.6E-01 |
| cg07975793 | <i>CSMD2</i>   | chr1  | Body    | 1.22 | (0.86; 1.73) | 2.6E-01 |
| cg18625951 | <i>CNTNAP2</i> | chr7  | Body    | 0.83 | (0.59; 1.15) | 2.6E-01 |
| cg20710480 | <i>ATP8A1</i>  | chr4  | Body    | 1.41 | (0.78; 2.58) | 2.6E-01 |
| cg03200052 | <i>SUSD4</i>   | chr1  | TSS1500 | 1.21 | (0.87; 1.67) | 2.6E-01 |
| cg21458849 | <i>CDH11</i>   | chr16 | Body    | 0.83 | (0.6; 1.15)  | 2.6E-01 |
| cg26211126 | <i>PTPRN2</i>  | chr7  | Body    | 0.85 | (0.63; 1.13) | 2.6E-01 |
| cg10479452 | <i>RTN4RL1</i> | chr17 | Body    | 1.24 | (0.85; 1.79) | 2.6E-01 |
| cg01204647 | <i>FBXO38</i>  | chr5  | 5'UTR   | 0.81 | (0.57; 1.17) | 2.6E-01 |
| cg04460007 | <i>DCUN1D4</i> | chr4  | Body    | 1.23 | (0.86; 1.75) | 2.6E-01 |
| cg24969942 | <i>SLC16A9</i> | chr10 | 5'UTR   | 1.27 | (0.84; 1.93) | 2.6E-01 |
| cg25203031 | <i>SGIP1</i>   | chr1  | TSS200  | 0.77 | (0.49; 1.21) | 2.6E-01 |
| cg15163159 | <i>CDH11</i>   | chr16 | 5'UTR   | 1.18 | (0.88; 1.57) | 2.6E-01 |
| cg05982423 | <i>CTNND2</i>  | chr5  | Body    | 0.75 | (0.45; 1.24) | 2.6E-01 |
| cg05982423 | <i>CTNND2</i>  | chr5  | 5'UTR   | 0.75 | (0.45; 1.24) | 2.6E-01 |
| cg27436717 | <i>CDH13</i>   | chr16 | 5'UTR   | 0.85 | (0.64; 1.13) | 2.6E-01 |
| cg27436717 | <i>CDH13</i>   | chr16 | Body    | 0.85 | (0.64; 1.13) | 2.6E-01 |
| cg17705631 | <i>GNA12</i>   | chr7  | Body    | 1.28 | (0.83; 1.99) | 2.6E-01 |
| cg16339550 | <i>ALCAM</i>   | chr3  | Body    | 0.83 | (0.6; 1.15)  | 2.6E-01 |
| cg10769178 | <i>PTPRN2</i>  | chr7  | Body    | 1.25 | (0.85; 1.84) | 2.6E-01 |
| cg04395439 | <i>TENM2</i>   | chr5  | Body    | 0.76 | (0.47; 1.23) | 2.6E-01 |
| cg14462553 | <i>PTPRN2</i>  | chr7  | Body    | 1.19 | (0.88; 1.61) | 2.6E-01 |
| cg22992503 | <i>WWOX</i>    | chr16 | Body    | 1.21 | (0.87; 1.67) | 2.6E-01 |
| cg00435063 | <i>PTPRN2</i>  | chr7  | Body    | 0.82 | (0.58; 1.16) | 2.6E-01 |



|            |                |       |         |      |              |         |
|------------|----------------|-------|---------|------|--------------|---------|
| cg03198275 | <i>CHCHD6</i>  | chr3  | TSS200  | 0.81 | (0.57; 1.16) | 2.6E-01 |
| cg05848484 | <i>CACNA1C</i> | chr12 | Body    | 0.76 | (0.47; 1.23) | 2.6E-01 |
| cg12383147 | <i>CDH13</i>   | chr16 | Body    | 0.79 | (0.52; 1.19) | 2.6E-01 |
| cg01398181 | <i>CACNA1C</i> | chr12 | Body    | 0.82 | (0.59; 1.16) | 2.6E-01 |
| cg11473412 | <i>FBXO32</i>  | chr8  | Body    | 1.29 | (0.83; 2.01) | 2.6E-01 |
| cg10021003 | <i>MTNR1B</i>  | chr11 | TSS1500 | 1.22 | (0.86; 1.74) | 2.6E-01 |
| cg16865135 | <i>RTN4</i>    | chr2  | TSS1500 | 1.24 | (0.85; 1.8)  | 2.6E-01 |
| cg16865135 | <i>RTN4</i>    | chr2  | Body    | 1.24 | (0.85; 1.8)  | 2.6E-01 |
| cg02956699 | <i>PTPRN2</i>  | chr7  | Body    | 1.55 | (0.72; 3.31) | 2.6E-01 |
| cg25891890 | <i>ZNF704</i>  | chr8  | Body    | 0.83 | (0.6; 1.15)  | 2.6E-01 |
| cg12776754 | <i>DACH1</i>   | chr13 | Body    | 0.81 | (0.55; 1.17) | 2.6E-01 |
| cg04601045 | <i>PTPRN2</i>  | chr7  | Body    | 1.2  | (0.87; 1.67) | 2.6E-01 |
| cg22242408 | <i>FBXO11</i>  | chr2  | 5'UTR   | 1.2  | (0.87; 1.65) | 2.6E-01 |
| cg17191367 | <i>ELAVL4</i>  | chr1  | TSS1500 | 0.82 | (0.58; 1.16) | 2.6E-01 |
| cg17191367 | <i>ELAVL4</i>  | chr1  | Body    | 0.82 | (0.58; 1.16) | 2.6E-01 |
| cg20005629 | <i>PTPRN2</i>  | chr7  | Body    | 0.81 | (0.56; 1.17) | 2.6E-01 |
| cg16629450 | <i>AKAP13</i>  | chr15 | 5'UTR   | 1.28 | (0.83; 1.96) | 2.6E-01 |
| cg04571941 | <i>TNRC18</i>  | chr7  | TSS200  | 0.81 | (0.57; 1.17) | 2.6E-01 |
| cg14565408 | <i>CUX2</i>    | chr12 | Body    | 1.27 | (0.84; 1.93) | 2.6E-01 |
| cg24051057 | <i>CCDC80</i>  | chr3  | Body    | 0.82 | (0.57; 1.16) | 2.6E-01 |
| cg00981975 | <i>SMARCD3</i> | chr7  | TSS1500 | 1.28 | (0.83; 1.98) | 2.6E-01 |
| cg06898168 | <i>TNRC18</i>  | chr7  | Body    | 0.62 | (0.26; 1.44) | 2.6E-01 |
| cg14640066 | <i>RTN4</i>    | chr2  | Body    | 1.26 | (0.84; 1.89) | 2.6E-01 |
| cg14640066 | <i>RTN4</i>    | chr2  | 1stExon | 1.26 | (0.84; 1.89) | 2.6E-01 |
| cg14640066 | <i>RTN4</i>    | chr2  | 5'UTR   | 1.26 | (0.84; 1.89) | 2.6E-01 |
| cg06721096 | <i>PTPRN2</i>  | chr7  | Body    | 1.21 | (0.86; 1.7)  | 2.6E-01 |
| cg08242024 | <i>PTPRN2</i>  | chr7  | Body    | 0.84 | (0.63; 1.14) | 2.6E-01 |
| cg09256836 | <i>FBXO11</i>  | chr2  | Body    | 0.79 | (0.51; 1.2)  | 2.6E-01 |
| cg25384018 | <i>CDH13</i>   | chr16 | TSS1500 | 0.81 | (0.56; 1.17) | 2.6E-01 |
| cg11268049 | <i>PTPRN2</i>  | chr7  | Body    | 0.78 | (0.5; 1.21)  | 2.6E-01 |
| cg07037223 | <i>PTPRN2</i>  | chr7  | Body    | 1.21 | (0.87; 1.68) | 2.6E-01 |
| cg21545849 | <i>CHD6</i>    | chr20 | TSS200  | 1.19 | (0.88; 1.6)  | 2.6E-01 |
| cg06780830 | <i>PTPRN2</i>  | chr7  | Body    | 1.2  | (0.87; 1.64) | 2.6E-01 |
| cg19815109 | <i>BARX2</i>   | chr11 | Body    | 0.82 | (0.59; 1.16) | 2.6E-01 |
| cg20449654 | <i>MTCL1</i>   | chr18 | Body    | 1.22 | (0.86; 1.72) | 2.6E-01 |
| cg12859234 | <i>DDHD2</i>   | chr8  | 5'UTR   | 1.19 | (0.88; 1.62) | 2.6E-01 |
| cg12859234 | <i>DDHD2</i>   | chr8  | 1stExon | 1.19 | (0.88; 1.62) | 2.6E-01 |
| cg02849583 | <i>FSTL1</i>   | chr3  | Body    | 1.26 | (0.84; 1.89) | 2.6E-01 |
| cg05024925 | <i>MTCL1</i>   | chr18 | Body    | 1.24 | (0.85; 1.81) | 2.6E-01 |
| cg11191368 | <i>ZNF704</i>  | chr8  | Body    | 0.82 | (0.58; 1.16) | 2.6E-01 |
| cg03943568 | <i>CDH11</i>   | chr16 | 5'UTR   | 0.83 | (0.61; 1.15) | 2.6E-01 |
| cg17267880 | <i>NOL4L</i>   | chr20 | Body    | 1.26 | (0.84; 1.91) | 2.6E-01 |
| cg01898902 | <i>FBXO33</i>  | chr14 | TSS1500 | 1.2  | (0.87; 1.65) | 2.6E-01 |
| cg07875385 | <i>COL5A2</i>  | chr2  | 1stExon | 1.23 | (0.86; 1.76) | 2.6E-01 |
| cg07875385 | <i>COL5A2</i>  | chr2  | 5'UTR   | 1.23 | (0.86; 1.76) | 2.6E-01 |
| cg26706676 | <i>PTPRN2</i>  | chr7  | Body    | 0.84 | (0.62; 1.14) | 2.6E-01 |
| cg04272632 | <i>CSMD2</i>   | chr1  | Body    | 1.3  | (0.82; 2.05) | 2.6E-01 |
| cg19631443 | <i>WAC</i>     | chr10 | TSS200  | 0.82 | (0.58; 1.16) | 2.6E-01 |
| cg19631443 | <i>WAC</i>     | chr10 | TSS1500 | 0.82 | (0.58; 1.16) | 2.6E-01 |
| cg02539798 | <i>PTPRN2</i>  | chr7  | Body    | 0.84 | (0.61; 1.14) | 2.6E-01 |
| cg03556243 | <i>ZBTB20</i>  | chr3  | TSS1500 | 0.83 | (0.59; 1.16) | 2.7E-01 |
| cg03556243 | <i>ZBTB20</i>  | chr3  | 5'UTR   | 0.83 | (0.59; 1.16) | 2.7E-01 |
| cg03556243 | <i>ZBTB20</i>  | chr3  | 1stExon | 0.83 | (0.59; 1.16) | 2.7E-01 |
| cg13360566 | <i>CHCHD6</i>  | chr3  | Body    | 0.84 | (0.62; 1.14) | 2.7E-01 |
| cg03927473 | <i>NOL4L</i>   | chr20 | Body    | 0.8  | (0.55; 1.18) | 2.7E-01 |
| cg18628367 | <i>PTPRN2</i>  | chr7  | Body    | 0.83 | (0.6; 1.15)  | 2.7E-01 |
| cg01623475 | <i>WWOX</i>    | chr16 | Body    | 0.85 | (0.64; 1.13) | 2.7E-01 |
| cg01168404 | <i>CSMD2</i>   | chr1  | Body    | 1.25 | (0.84; 1.84) | 2.7E-01 |
| cg10398297 | <i>CTNND2</i>  | chr5  | Body    | 1.3  | (0.82; 2.06) | 2.7E-01 |
| cg10398297 | <i>CTNND2</i>  | chr5  | ExonBnd | 1.3  | (0.82; 2.06) | 2.7E-01 |
| cg19699973 | <i>TNRC6C</i>  | chr17 | 5'UTR   | 1.22 | (0.86; 1.74) | 2.7E-01 |



|            |                  |       |         |      |              |         |
|------------|------------------|-------|---------|------|--------------|---------|
| cg10801633 | <i>PEX14</i>     | chr1  | Body    | 1.3  | (0.82; 2.05) | 2.7E-01 |
| cg25731074 | <i>CHCHD6</i>    | chr3  | Body    | 0.86 | (0.65; 1.12) | 2.7E-01 |
| cg04110718 | <i>RTN4RL1</i>   | chr17 | Body    | 1.23 | (0.85; 1.77) | 2.7E-01 |
| cg19973668 | <i>TENM2</i>     | chr5  | Body    | 1.22 | (0.86; 1.74) | 2.7E-01 |
| cg05233288 | <i>PEX14</i>     | chr1  | TSS1500 | 0.82 | (0.58; 1.16) | 2.7E-01 |
| cg15948785 | <i>PTPRN2</i>    | chr7  | Body    | 0.85 | (0.64; 1.13) | 2.7E-01 |
| cg09684136 | <i>ALCAM</i>     | chr3  | TSS1500 | 1.21 | (0.86; 1.71) | 2.7E-01 |
| cg08627800 | <i>PTPRN2</i>    | chr7  | Body    | 0.84 | (0.62; 1.14) | 2.7E-01 |
| cg16202091 | <i>PTPRN2</i>    | chr7  | Body    | 1.2  | (0.87; 1.67) | 2.7E-01 |
| cg20633146 | <i>TNR</i>       | chr1  | 5'UTR   | 0.8  | (0.53; 1.19) | 2.7E-01 |
| cg11656752 | <i>RTN4RL1</i>   | chr17 | Body    | 1.23 | (0.85; 1.78) | 2.7E-01 |
| cg07930089 | <i>AKAP13</i>    | chr15 | 5'UTR   | 0.82 | (0.57; 1.17) | 2.7E-01 |
| cg07031665 | <i>C11orf67</i>  | chr11 | TSS200  | 1.22 | (0.86; 1.72) | 2.7E-01 |
| cg07096446 | <i>FBXO11</i>    | chr2  | Body    | 1.2  | (0.87; 1.65) | 2.7E-01 |
| cg05678155 | <i>ZBTB20</i>    | chr3  | TSS1500 | 0.81 | (0.56; 1.17) | 2.7E-01 |
| cg05678155 | <i>ZBTB20</i>    | chr3  | Body    | 0.81 | (0.56; 1.17) | 2.7E-01 |
| cg05678155 | <i>ZBTB20</i>    | chr3  | 5'UTR   | 0.81 | (0.56; 1.17) | 2.7E-01 |
| cg04080180 | <i>TNRC18</i>    | chr7  | 5'UTR   | 1.24 | (0.85; 1.8)  | 2.7E-01 |
| cg02282041 | <i>CDH13</i>     | chr16 | Body    | 0.83 | (0.59; 1.15) | 2.7E-01 |
| cg19261526 | <i>PTPRN2</i>    | chr7  | Body    | 0.83 | (0.61; 1.15) | 2.7E-01 |
| cg14933832 | <i>DNAI2</i>     | chr17 | Body    | 0.83 | (0.59; 1.16) | 2.7E-01 |
| cg23697486 | <i>CUX2</i>      | chr12 | Body    | 0.83 | (0.59; 1.16) | 2.7E-01 |
| cg02134720 | <i>TNFRSF11B</i> | chr8  | Body    | 0.81 | (0.56; 1.17) | 2.7E-01 |
| cg02617428 | <i>PTPRN2</i>    | chr7  | Body    | 0.82 | (0.57; 1.17) | 2.7E-01 |
| cg25153894 | <i>ATF7IP</i>    | chr12 | 5'UTR   | 0.79 | (0.53; 1.2)  | 2.7E-01 |
| cg25153894 | <i>ATF7IP</i>    | chr12 | Body    | 0.79 | (0.53; 1.2)  | 2.7E-01 |
| cg21536815 | <i>FBXO11</i>    | chr2  | 5'UTR   | 1.25 | (0.84; 1.87) | 2.7E-01 |
| cg01807702 | <i>RTN4RL1</i>   | chr17 | Body    | 1.19 | (0.88; 1.61) | 2.7E-01 |
| cg11380223 | <i>PTPRN2</i>    | chr7  | Body    | 0.84 | (0.61; 1.15) | 2.7E-01 |
| cg20375320 | <i>CACNA1C</i>   | chr12 | Body    | 1.24 | (0.85; 1.82) | 2.7E-01 |
| cg17484877 | <i>PTPRN2</i>    | chr7  | Body    | 0.82 | (0.59; 1.16) | 2.7E-01 |
| cg10459100 | <i>CHCHD6</i>    | chr3  | Body    | 0.82 | (0.58; 1.17) | 2.7E-01 |
| cg25772827 | <i>CSMD2</i>     | chr1  | TSS1500 | 0.82 | (0.57; 1.17) | 2.7E-01 |
| cg16874861 | <i>MTCL1</i>     | chr18 | Body    | 0.83 | (0.61; 1.15) | 2.7E-01 |
| cg04196520 | <i>WVOX</i>      | chr16 | Body    | 1.2  | (0.87; 1.65) | 2.7E-01 |
| cg25708755 | <i>PTPRN2</i>    | chr7  | Body    | 1.17 | (0.88; 1.55) | 2.7E-01 |
| cg05996213 | <i>TNR</i>       | chr1  | 1stExon | 1.19 | (0.88; 1.61) | 2.7E-01 |
| cg05996213 | <i>TNR</i>       | chr1  | 5'UTR   | 1.19 | (0.88; 1.61) | 2.7E-01 |
| cg07048094 | <i>PTPRN2</i>    | chr7  | Body    | 0.82 | (0.58; 1.16) | 2.7E-01 |
| cg17875356 | <i>ZBTB20</i>    | chr3  | 5'UTR   | 1.28 | (0.82; 2)    | 2.7E-01 |
| cg23289581 | <i>RTN4RL1</i>   | chr17 | Body    | 0.84 | (0.61; 1.15) | 2.7E-01 |
| cg06481141 | <i>CHD6</i>      | chr20 | Body    | 1.25 | (0.84; 1.85) | 2.7E-01 |
| cg06145175 | <i>FBXO31</i>    | chr16 | TSS1500 | 0.81 | (0.55; 1.18) | 2.7E-01 |
| cg07503211 | <i>TNRC18</i>    | chr7  | Body    | 1.24 | (0.84; 1.83) | 2.7E-01 |
| cg24502224 | <i>PEX14</i>     | chr1  | Body    | 1.2  | (0.86; 1.68) | 2.7E-01 |
| cg24151528 | <i>PTPRS</i>     | chr19 | Body    | 1.21 | (0.86; 1.7)  | 2.7E-01 |
| cg04288257 | <i>PTPRN2</i>    | chr7  | ExonBnd | 0.83 | (0.6; 1.15)  | 2.7E-01 |
| cg04288257 | <i>PTPRN2</i>    | chr7  | Body    | 0.83 | (0.6; 1.15)  | 2.7E-01 |
| cg16351352 | <i>FBXO34</i>    | chr14 | TSS1500 | 1.2  | (0.87; 1.66) | 2.7E-01 |
| cg16351352 | <i>FBXO34</i>    | chr14 | 5'UTR   | 1.2  | (0.87; 1.66) | 2.7E-01 |
| cg22458416 | <i>SUGCT</i>     | chr7  | Body    | 0.84 | (0.61; 1.15) | 2.7E-01 |
| cg16513984 | <i>TNFRSF1B</i>  | chr1  | Body    | 1.27 | (0.83; 1.95) | 2.7E-01 |
| cg22645476 | <i>SUGCT</i>     | chr7  | Body    | 0.84 | (0.62; 1.14) | 2.7E-01 |
| cg11734772 | <i>PTPRN2</i>    | chr7  | Body    | 1.25 | (0.84; 1.86) | 2.7E-01 |
| cg05894754 | <i>UNC80</i>     | chr2  | Body    | 1.18 | (0.88; 1.58) | 2.7E-01 |
| cg10004964 | <i>SGIP1</i>     | chr1  | Body    | 1.26 | (0.83; 1.92) | 2.7E-01 |
| cg20324057 | <i>ZNFX04</i>    | chr8  | TSS1500 | 1.21 | (0.86; 1.7)  | 2.7E-01 |
| cg05939552 | <i>BRUNOL4</i>   | chr18 | Body    | 0.83 | (0.6; 1.15)  | 2.7E-01 |
| cg21315209 | <i>CTNND2</i>    | chr5  | Body    | 0.81 | (0.55; 1.18) | 2.7E-01 |
| cg23993628 | <i>ACVR2A</i>    | chr2  | Body    | 1.22 | (0.86; 1.74) | 2.7E-01 |
| cg15086499 | <i>TNRC18</i>    | chr7  | Body    | 0.78 | (0.5; 1.21)  | 2.7E-01 |



|            |           |       |         |      |              |         |
|------------|-----------|-------|---------|------|--------------|---------|
| cg24792245 | WAC       | chr10 | TSS1500 | 0.83 | (0.6; 1.15)  | 2.7E-01 |
| cg20047612 | SUGCT     | chr7  | Body    | 0.79 | (0.52; 1.21) | 2.7E-01 |
| cg00124640 | ORC4      | chr2  | ExonBnd | 0.81 | (0.55; 1.18) | 2.7E-01 |
| cg00124640 | ORC4      | chr2  | Body    | 0.81 | (0.55; 1.18) | 2.7E-01 |
| cg05134054 | CUX2      | chr12 | Body    | 0.84 | (0.61; 1.15) | 2.7E-01 |
| cg08572454 | PTPRN2    | chr7  | Body    | 0.82 | (0.58; 1.17) | 2.7E-01 |
| cg19518674 | AKAP13    | chr15 | Body    | 0.8  | (0.55; 1.19) | 2.7E-01 |
| cg17319486 | BRUNOL4   | chr18 | TSS1500 | 1.21 | (0.86; 1.69) | 2.7E-01 |
| cg03180489 | CCDC80    | chr3  | TSS1500 | 0.8  | (0.54; 1.19) | 2.7E-01 |
| cg12528597 | RTN4RL2   | chr11 | Body    | 1.23 | (0.85; 1.79) | 2.7E-01 |
| cg11741116 | CTDSPL    | chr3  | Body    | 1.3  | (0.81; 2.07) | 2.7E-01 |
| cg02055816 | SMARCD3   | chr7  | Body    | 1.24 | (0.84; 1.82) | 2.7E-01 |
| cg09219260 | DACH1     | chr13 | Body    | 1.25 | (0.84; 1.86) | 2.7E-01 |
| cg07691061 | CTNND2    | chr5  | Body    | 1.23 | (0.85; 1.78) | 2.7E-01 |
| cg07691061 | CTNND2    | chr5  | 5'UTR   | 1.23 | (0.85; 1.78) | 2.7E-01 |
| cg19786287 | SMARCD3   | chr7  | TSS200  | 0.82 | (0.57; 1.17) | 2.7E-01 |
| cg19786287 | SMARCD3   | chr7  | TSS1500 | 0.82 | (0.57; 1.17) | 2.7E-01 |
| cg07305000 | PTPRN2    | chr7  | Body    | 1.21 | (0.86; 1.71) | 2.7E-01 |
| cg08892600 | SUSD4     | chr1  | TSS1500 | 1.24 | (0.85; 1.8)  | 2.7E-01 |
| cg19243780 | UBE2E2    | chr3  | Body    | 1.28 | (0.82; 2)    | 2.7E-01 |
| cg10789486 | DACH1     | chr13 | Body    | 0.72 | (0.4; 1.3)   | 2.7E-01 |
| cg05135176 | PTPRN2    | chr7  | Body    | 0.8  | (0.54; 1.19) | 2.7E-01 |
| cg03529680 | UNC80     | chr2  | Body    | 0.84 | (0.61; 1.15) | 2.7E-01 |
| cg09052738 | TNRC18    | chr7  | Body    | 0.8  | (0.53; 1.2)  | 2.7E-01 |
| cg11947493 | TNFRSF10D | chr8  | 5'UTR   | 0.83 | (0.6; 1.15)  | 2.7E-01 |
| cg11947493 | TNFRSF10D | chr8  | 1stExon | 0.83 | (0.6; 1.15)  | 2.7E-01 |
| cg18773641 | SUGCT     | chr7  | Body    | 1.2  | (0.87; 1.65) | 2.7E-01 |
| cg18411660 | PTPRN2    | chr7  | Body    | 1.18 | (0.88; 1.6)  | 2.7E-01 |
| cg06235522 | MEIS2     | chr15 | Body    | 1.26 | (0.83; 1.92) | 2.7E-01 |
| cg06390057 | SUGCT     | chr7  | Body    | 0.84 | (0.61; 1.15) | 2.7E-01 |
| cg00310497 | FBXO36    | chr2  | Body    | 0.82 | (0.57; 1.17) | 2.7E-01 |
| cg18773591 | NRXN1     | chr2  | Body    | 0.73 | (0.41; 1.29) | 2.7E-01 |
| cg26247345 | ZBTB20    | chr3  | Body    | 0.71 | (0.38; 1.31) | 2.7E-01 |
| cg26247345 | ZBTB20    | chr3  | 5'UTR   | 0.71 | (0.38; 1.31) | 2.7E-01 |
| cg10668781 | CACNA1C   | chr12 | Body    | 1.21 | (0.86; 1.69) | 2.7E-01 |
| cg08083403 | TNRC6A    | chr16 | TSS1500 | 0.85 | (0.64; 1.13) | 2.7E-01 |
| cg05498379 | WAC       | chr10 | TSS200  | 0.82 | (0.57; 1.17) | 2.7E-01 |
| cg05498379 | WAC       | chr10 | TSS1500 | 0.82 | (0.57; 1.17) | 2.7E-01 |
| cg00156147 | TENM2     | chr5  | Body    | 1.22 | (0.86; 1.73) | 2.7E-01 |
| cg13542466 | SMARCD3   | chr7  | TSS1500 | 1.21 | (0.86; 1.71) | 2.7E-01 |
| cg13542466 | SMARCD3   | chr7  | Body    | 1.21 | (0.86; 1.71) | 2.7E-01 |
| cg01868752 | CNTNAP2   | chr7  | Body    | 1.23 | (0.85; 1.76) | 2.8E-01 |
| cg02317358 | WVOX      | chr16 | Body    | 1.19 | (0.87; 1.64) | 2.8E-01 |
| cg14311088 | TNRC6B    | chr22 | Body    | 0.84 | (0.61; 1.15) | 2.8E-01 |
| cg14311088 | TNRC6B    | chr22 | TSS200  | 0.84 | (0.61; 1.15) | 2.8E-01 |
| cg10702789 | PHACTR1   | chr6  | Body    | 1.25 | (0.84; 1.85) | 2.8E-01 |
| cg15570635 | AKAP13    | chr15 | Body    | 1.21 | (0.86; 1.71) | 2.8E-01 |
| cg10300540 | AKAP13    | chr15 | Body    | 1.28 | (0.82; 2.02) | 2.8E-01 |
| cg12806121 | PEX14     | chr1  | Body    | 1.2  | (0.86; 1.68) | 2.8E-01 |
| cg25534486 | PTPRN2    | chr7  | Body    | 0.85 | (0.63; 1.14) | 2.8E-01 |
| cg13742512 | CUX2      | chr12 | Body    | 0.71 | (0.38; 1.32) | 2.8E-01 |
| cg24844230 | CHFR      | chr12 | Body    | 1.2  | (0.87; 1.65) | 2.8E-01 |
| cg20721322 | CNTNAP2   | chr7  | Body    | 1.19 | (0.87; 1.64) | 2.8E-01 |
| cg03096471 | DCUN1D4   | chr4  | Body    | 0.81 | (0.55; 1.18) | 2.8E-01 |
| cg23240589 | RTN4      | chr2  | Body    | 0.84 | (0.62; 1.15) | 2.8E-01 |
| cg01231125 | UBE2E2    | chr3  | 3'UTR   | 0.8  | (0.53; 1.2)  | 2.8E-01 |
| cg22774472 | COL5A2    | chr2  | TSS200  | 1.23 | (0.85; 1.77) | 2.8E-01 |
| cg04996852 | CREBBP    | chr16 | 1stExon | 0.83 | (0.6; 1.16)  | 2.8E-01 |
| cg04996852 | CREBBP    | chr16 | 5'UTR   | 0.83 | (0.6; 1.16)  | 2.8E-01 |
| cg25950769 | AKAP13    | chr15 | 5'UTR   | 1.21 | (0.86; 1.71) | 2.8E-01 |
| cg02147465 | ZBTB20    | chr3  | Body    | 0.78 | (0.5; 1.22)  | 2.8E-01 |



|            |           |       |         |      |              |         |
|------------|-----------|-------|---------|------|--------------|---------|
| cg24711637 | NOL4      | chr18 | TSS1500 | 0.82 | (0.58; 1.17) | 2.8E-01 |
| cg24711637 | NOL4      | chr18 | Body    | 0.82 | (0.58; 1.17) | 2.8E-01 |
| cg09816096 | PTPRS     | chr19 | Body    | 0.83 | (0.59; 1.16) | 2.8E-01 |
| cg09664186 | FBXO11    | chr2  | 5'UTR   | 1.4  | (0.76; 2.56) | 2.8E-01 |
| cg22636811 | TENM2     | chr5  | Body    | 0.82 | (0.58; 1.17) | 2.8E-01 |
| cg05309328 | TNFRSF11A | chr18 | Body    | 1.19 | (0.87; 1.62) | 2.8E-01 |
| cg03653726 | GNA12     | chr7  | 3'UTR   | 0.83 | (0.59; 1.16) | 2.8E-01 |
| cg06962684 | BRUNOL4   | chr18 | Body    | 1.23 | (0.85; 1.78) | 2.8E-01 |
| cg03661076 | FBXO31    | chr16 | Body    | 1.22 | (0.86; 1.73) | 2.8E-01 |
| cg14426104 | DMXL2     | chr15 | Body    | 1.23 | (0.85; 1.78) | 2.8E-01 |
| cg13136242 | CTDSPL2   | chr15 | TSS200  | 0.83 | (0.6; 1.16)  | 2.8E-01 |
| cg16013015 | ATP6V0C   | chr16 | 1stExon | 0.83 | (0.59; 1.16) | 2.8E-01 |
| cg16013015 | ATP6V0C   | chr16 | 5'UTR   | 0.83 | (0.59; 1.16) | 2.8E-01 |
| cg03908109 | MTNR1A    | chr4  | Body    | 1.18 | (0.87; 1.6)  | 2.8E-01 |
| cg12794620 | RTN4RL1   | chr17 | TSS200  | 1.21 | (0.86; 1.69) | 2.8E-01 |
| cg08882470 | CACNA1C   | chr12 | Body    | 1.35 | (0.78; 2.33) | 2.8E-01 |
| cg20707991 | PTPRN2    | chr7  | Body    | 1.21 | (0.86; 1.69) | 2.8E-01 |
| cg08785396 | ALCAM     | chr3  | Body    | 0.84 | (0.61; 1.15) | 2.8E-01 |
| cg08951403 | PTPRN2    | chr7  | Body    | 1.21 | (0.86; 1.71) | 2.8E-01 |
| cg08953938 | RTN4      | chr2  | Body    | 0.83 | (0.6; 1.16)  | 2.8E-01 |
| cg15833565 | ERI3      | chr1  | Body    | 0.79 | (0.52; 1.21) | 2.8E-01 |
| cg04025761 | CUX2      | chr12 | Body    | 0.84 | (0.61; 1.15) | 2.8E-01 |
| cg11417319 | PTPRN2    | chr7  | Body    | 1.23 | (0.85; 1.77) | 2.8E-01 |
| cg09856200 | CTNND2    | chr5  | Body    | 0.81 | (0.56; 1.18) | 2.8E-01 |
| cg08463614 | TENM2     | chr5  | Body    | 1.21 | (0.86; 1.7)  | 2.8E-01 |
| cg14970796 | RNU5E-1   | chr5  | Body    | 0.84 | (0.62; 1.15) | 2.8E-01 |
| cg02064158 | RTN4RL1   | chr17 | TSS1500 | 1.23 | (0.84; 1.79) | 2.8E-01 |
| cg25059070 | PTPRN2    | chr7  | Body    | 1.2  | (0.86; 1.68) | 2.8E-01 |
| cg13027142 | NRXN1     | chr2  | Body    | 1.19 | (0.87; 1.62) | 2.8E-01 |
| cg11825324 | PTPRN2    | chr7  | Body    | 0.81 | (0.55; 1.19) | 2.8E-01 |
| cg12933719 | POU2F1    | chr1  | Body    | 1.25 | (0.83; 1.88) | 2.8E-01 |
| cg12110036 | SCAF8     | chr6  | Body    | 1.18 | (0.87; 1.61) | 2.8E-01 |
| cg07956346 | SGIP1     | chr1  | Body    | 0.83 | (0.59; 1.16) | 2.8E-01 |
| cg01688293 | CHFR      | chr12 | Body    | 1.21 | (0.86; 1.71) | 2.8E-01 |
| cg05467318 | AKAP13    | chr15 | Body    | 0.8  | (0.54; 1.19) | 2.8E-01 |
| cg26968962 | FBXO31    | chr16 | Body    | 0.85 | (0.63; 1.14) | 2.8E-01 |
| cg26968962 | FBXO31    | chr16 | TSS1500 | 0.85 | (0.63; 1.14) | 2.8E-01 |
| cg26365957 | PTPRS     | chr19 | 5'UTR   | 1.2  | (0.86; 1.67) | 2.8E-01 |
| cg22767408 | FBXO36    | chr2  | Body    | 1.22 | (0.85; 1.74) | 2.8E-01 |
| cg12895407 | TENM2     | chr5  | Body    | 0.81 | (0.55; 1.19) | 2.8E-01 |
| cg15086714 | TENM2     | chr5  | Body    | 0.83 | (0.59; 1.17) | 2.8E-01 |
| cg14750751 | CUX2      | chr12 | Body    | 0.82 | (0.58; 1.17) | 2.8E-01 |
| cg06819373 | PTPRN2    | chr7  | Body    | 0.82 | (0.58; 1.17) | 2.8E-01 |
| cg14859916 | CNTNAP2   | chr7  | Body    | 0.86 | (0.65; 1.14) | 2.8E-01 |
| cg21624337 | CTNND2    | chr5  | Body    | 1.2  | (0.86; 1.68) | 2.8E-01 |
| cg21265989 | FBXO31    | chr16 | TSS1500 | 1.23 | (0.84; 1.8)  | 2.8E-01 |
| cg09956718 | UNC80     | chr2  | Body    | 0.84 | (0.61; 1.15) | 2.8E-01 |
| cg23211119 | CACNA1C   | chr12 | Body    | 1.27 | (0.82; 1.96) | 2.8E-01 |
| cg04920279 | GNA12     | chr7  | Body    | 1.22 | (0.85; 1.75) | 2.8E-01 |
| cg15535798 | CTDSPL2   | chr15 | Body    | 1.19 | (0.87; 1.63) | 2.8E-01 |
| cg15535798 | CTDSPL2   | chr15 | ExonBnd | 1.19 | (0.87; 1.63) | 2.8E-01 |
| cg05793240 | GNA12     | chr7  | Body    | 1.18 | (0.87; 1.61) | 2.8E-01 |
| cg14494018 | PHACTR1   | chr6  | Body    | 0.82 | (0.58; 1.17) | 2.8E-01 |
| cg01239704 | PTPRN2    | chr7  | Body    | 0.84 | (0.61; 1.15) | 2.8E-01 |
| cg09250693 | PTPRN2    | chr7  | Body    | 1.2  | (0.86; 1.68) | 2.8E-01 |
| cg16249010 | PTPRN2    | chr7  | Body    | 1.19 | (0.86; 1.65) | 2.8E-01 |
| cg01787084 | FBXO31    | chr16 | Body    | 0.54 | (0.18; 1.65) | 2.8E-01 |
| cg25481630 | PTPRN2    | chr7  | Body    | 0.8  | (0.53; 1.2)  | 2.8E-01 |
| cg26636474 | PTPRN2    | chr7  | Body    | 0.83 | (0.58; 1.17) | 2.8E-01 |
| cg10322360 | PEX14     | chr1  | Body    | 0.83 | (0.59; 1.17) | 2.8E-01 |
| cg15470745 | DMXL2     | chr15 | Body    | 0.81 | (0.55; 1.19) | 2.8E-01 |



|            |                  |       |         |      |              |         |
|------------|------------------|-------|---------|------|--------------|---------|
| cg05263760 | <i>PHACTR1</i>   | chr6  | Body    | 0.83 | (0.59; 1.17) | 2.8E-01 |
| cg04007350 | <i>PTPRN2</i>    | chr7  | Body    | 0.79 | (0.51; 1.22) | 2.8E-01 |
| cg00848945 | <i>CACNA1C</i>   | chr12 | 3'UTR   | 1.21 | (0.86; 1.69) | 2.8E-01 |
| cg12258607 | <i>PHACTR1</i>   | chr6  | TSS1500 | 0.83 | (0.59; 1.17) | 2.8E-01 |
| cg01780378 | <i>TNRC18</i>    | chr7  | 5'UTR   | 0.84 | (0.62; 1.15) | 2.8E-01 |
| cg08576518 | <i>PTPRN2</i>    | chr7  | Body    | 0.84 | (0.62; 1.15) | 2.8E-01 |
| cg20126874 | <i>WVOX</i>      | chr16 | Body    | 1.22 | (0.85; 1.75) | 2.8E-01 |
| cg00280858 | <i>PTPRN2</i>    | chr7  | Body    | 0.82 | (0.57; 1.18) | 2.8E-01 |
| cg15192120 | <i>PTPRN2</i>    | chr7  | Body    | 0.82 | (0.57; 1.18) | 2.8E-01 |
| cg02116416 | <i>PTPRN2</i>    | chr7  | Body    | 0.84 | (0.61; 1.15) | 2.8E-01 |
| cg15583193 | <i>PTPRN2</i>    | chr7  | Body    | 1.21 | (0.86; 1.7)  | 2.8E-01 |
| cg16104006 | <i>RTN4RL1</i>   | chr17 | Body    | 0.84 | (0.61; 1.15) | 2.8E-01 |
| cg05050757 | <i>ATF7</i>      | chr12 | 5'UTR   | 0.83 | (0.59; 1.16) | 2.8E-01 |
| cg26362368 | <i>PEX14</i>     | chr1  | Body    | 1.36 | (0.78; 2.37) | 2.8E-01 |
| cg09189772 | <i>CDH13</i>     | chr16 | Body    | 0.74 | (0.42; 1.29) | 2.8E-01 |
| cg11698252 | <i>AKAP13</i>    | chr15 | Body    | 0.83 | (0.59; 1.17) | 2.8E-01 |
| cg11698252 | <i>AKAP13</i>    | chr15 | TSS1500 | 0.83 | (0.59; 1.17) | 2.8E-01 |
| cg10658277 | <i>NOL4</i>      | chr18 | 5'UTR   | 1.21 | (0.85; 1.73) | 2.8E-01 |
| cg10658277 | <i>NOL4</i>      | chr18 | Body    | 1.21 | (0.85; 1.73) | 2.8E-01 |
| cg05433557 | <i>PTPRN2</i>    | chr7  | Body    | 1.24 | (0.84; 1.84) | 2.8E-01 |
| cg02637698 | <i>PTPRN2</i>    | chr7  | Body    | 1.19 | (0.87; 1.63) | 2.8E-01 |
| cg05585630 | <i>PTPRN2</i>    | chr7  | Body    | 1.17 | (0.88; 1.56) | 2.8E-01 |
| cg00462004 | <i>RTN4</i>      | chr2  | Body    | 1.31 | (0.8; 2.14)  | 2.8E-01 |
| cg25782293 | <i>PTPRN2</i>    | chr7  | Body    | 1.29 | (0.81; 2.08) | 2.8E-01 |
| cg04826336 | <i>PTPRN2</i>    | chr7  | Body    | 0.83 | (0.59; 1.17) | 2.8E-01 |
| cg18921123 | <i>SRSF10</i>    | chr1  | TSS200  | 0.84 | (0.61; 1.16) | 2.8E-01 |
| cg25049299 | <i>PTPRU</i>     | chr1  | Body    | 0.73 | (0.4; 1.31)  | 2.8E-01 |
| cg23730151 | <i>DDHD2</i>     | chr8  | Body    | 0.84 | (0.61; 1.16) | 2.8E-01 |
| cg17244098 | <i>TNFRSF1B</i>  | chr1  | TSS1500 | 1.19 | (0.86; 1.65) | 2.8E-01 |
| cg04707706 | <i>NRXN1</i>     | chr2  | Body    | 1.16 | (0.88; 1.53) | 2.8E-01 |
| cg04707706 | <i>NRXN1</i>     | chr2  | TSS1500 | 1.16 | (0.88; 1.53) | 2.8E-01 |
| cg23510449 | <i>CDH13</i>     | chr16 | Body    | 1.18 | (0.87; 1.6)  | 2.8E-01 |
| cg00423030 | <i>TNRC6C</i>    | chr17 | 5'UTR   | 1.2  | (0.86; 1.66) | 2.8E-01 |
| cg08530934 | <i>PTPRN2</i>    | chr7  | Body    | 1.19 | (0.87; 1.64) | 2.9E-01 |
| cg20040399 | <i>TNFRSF10D</i> | chr8  | Body    | 1.26 | (0.83; 1.92) | 2.9E-01 |
| cg01937840 | <i>CTNND2</i>    | chr5  | Body    | 0.83 | (0.59; 1.17) | 2.9E-01 |
| cg00355217 | <i>ZNF704</i>    | chr8  | Body    | 0.82 | (0.57; 1.18) | 2.9E-01 |
| cg22199651 | <i>PTPRN2</i>    | chr7  | Body    | 0.82 | (0.57; 1.18) | 2.9E-01 |
| cg06609051 | <i>NRXN1</i>     | chr2  | Body    | 0.83 | (0.59; 1.17) | 2.9E-01 |
| cg11173148 | <i>PTPRN2</i>    | chr7  | Body    | 0.84 | (0.62; 1.15) | 2.9E-01 |
| cg11018991 | <i>UBE2E2</i>    | chr3  | Body    | 1.25 | (0.83; 1.9)  | 2.9E-01 |
| cg12073979 | <i>CACNA1C</i>   | chr12 | Body    | 1.21 | (0.85; 1.71) | 2.9E-01 |
| cg02741158 | <i>CDH11</i>     | chr16 | 5'UTR   | 1.25 | (0.83; 1.9)  | 2.9E-01 |
| cg19458022 | <i>PTPRN2</i>    | chr7  | Body    | 1.19 | (0.87; 1.62) | 2.9E-01 |
| cg15684577 | <i>PTPRN2</i>    | chr7  | 3'UTR   | 1.19 | (0.86; 1.64) | 2.9E-01 |
| cg26874693 | <i>CUX2</i>      | chr12 | Body    | 0.77 | (0.47; 1.25) | 2.9E-01 |
| cg26629022 | <i>SUGCT</i>     | chr7  | TSS200  | 0.83 | (0.58; 1.17) | 2.9E-01 |
| cg23246296 | <i>FBXO38</i>    | chr5  | Body    | 0.82 | (0.56; 1.18) | 2.9E-01 |
| cg27112146 | <i>ACVR2A</i>    | chr2  | Body    | 0.81 | (0.55; 1.19) | 2.9E-01 |
| cg25867268 | <i>TNRC6B</i>    | chr22 | 5'UTR   | 1.2  | (0.85; 1.7)  | 2.9E-01 |
| cg02001606 | <i>SMARCD3</i>   | chr7  | Body    | 0.86 | (0.65; 1.14) | 2.9E-01 |
| cg06387496 | <i>GNA12</i>     | chr7  | Body    | 0.83 | (0.58; 1.17) | 2.9E-01 |
| cg11055991 | <i>PTPRN2</i>    | chr7  | Body    | 0.85 | (0.63; 1.15) | 2.9E-01 |
| cg16434681 | <i>TNRC18</i>    | chr7  | Body    | 0.83 | (0.59; 1.17) | 2.9E-01 |
| cg19080590 | <i>CDH13</i>     | chr16 | Body    | 0.83 | (0.58; 1.18) | 2.9E-01 |
| cg12508214 | <i>FBXO32</i>    | chr8  | TSS200  | 0.82 | (0.58; 1.18) | 2.9E-01 |
| cg07459363 | <i>CTNND2</i>    | chr5  | Body    | 0.8  | (0.53; 1.21) | 2.9E-01 |
| cg02245391 | <i>TENM2</i>     | chr5  | Body    | 0.83 | (0.59; 1.17) | 2.9E-01 |
| cg12307840 | <i>SUSD4</i>     | chr1  | TSS1500 | 1.2  | (0.86; 1.69) | 2.9E-01 |
| cg23904501 | <i>PTPRS</i>     | chr19 | 5'UTR   | 1.23 | (0.84; 1.78) | 2.9E-01 |
| cg04211238 | <i>TENM2</i>     | chr5  | Body    | 0.8  | (0.52; 1.21) | 2.9E-01 |



|            |           |       |         |      |              |         |
|------------|-----------|-------|---------|------|--------------|---------|
| cg25244800 | MEIS2     | chr15 | Body    | 0.84 | (0.6; 1.16)  | 2.9E-01 |
| cg27598407 | ATF7IP    | chr12 | 5'UTR   | 0.81 | (0.55; 1.2)  | 2.9E-01 |
| cg17716500 | TNRC6B    | chr22 | Body    | 1.99 | (0.56; 7.12) | 2.9E-01 |
| cg13799287 | WAC       | chr10 | TSS200  | 1.21 | (0.85; 1.74) | 2.9E-01 |
| cg13799287 | WAC       | chr10 | Body    | 1.21 | (0.85; 1.74) | 2.9E-01 |
| cg25910261 | PTPRN2    | chr7  | Body    | 1.24 | (0.83; 1.83) | 2.9E-01 |
| cg10863702 | CSMD2     | chr1  | Body    | 0.79 | (0.5; 1.23)  | 2.9E-01 |
| cg22865986 | FBXO36    | chr2  | TSS1500 | 1.2  | (0.85; 1.7)  | 2.9E-01 |
| cg02377544 | MEIS2     | chr15 | Body    | 1.19 | (0.86; 1.66) | 2.9E-01 |
| cg14875171 | NRXN1     | chr2  | Body    | 0.73 | (0.4; 1.32)  | 2.9E-01 |
| cg14875171 | NRXN1     | chr2  | 1stExon | 0.73 | (0.4; 1.32)  | 2.9E-01 |
| cg14875171 | NRXN1     | chr2  | 5'UTR   | 0.73 | (0.4; 1.32)  | 2.9E-01 |
| cg06053528 | MEX3A     | chr1  | Body    | 1.18 | (0.87; 1.61) | 2.9E-01 |
| cg06413426 | CUX2      | chr12 | Body    | 1.21 | (0.85; 1.73) | 2.9E-01 |
| cg08561514 | WVOX      | chr16 | Body    | 0.84 | (0.61; 1.16) | 2.9E-01 |
| cg05680541 | CTDSP2    | chr12 | Body    | 1.18 | (0.86; 1.62) | 2.9E-01 |
| cg00185804 | TNFRSF10B | chr8  | Body    | 0.82 | (0.56; 1.19) | 2.9E-01 |
| cg22902266 | BARX1     | chr9  | 3'UTR   | 0.82 | (0.57; 1.19) | 2.9E-01 |
| cg00371107 | ARID1A    | chr1  | 1stExon | 0.83 | (0.58; 1.17) | 2.9E-01 |
| cg23480273 | UBE2E2    | chr3  | Body    | 0.8  | (0.52; 1.22) | 2.9E-01 |
| cg13197200 | DNAI2     | chr17 | 5'UTR   | 1.19 | (0.86; 1.64) | 2.9E-01 |
| cg06826929 | PTPRS     | chr19 | Body    | 1.22 | (0.84; 1.77) | 2.9E-01 |
| cg05330126 | MTCL1     | chr18 | Body    | 0.76 | (0.45; 1.27) | 2.9E-01 |
| cg13709612 | BRUNOL4   | chr18 | Body    | 1.24 | (0.83; 1.84) | 2.9E-01 |
| cg05059605 | BARX2     | chr11 | TSS1500 | 0.82 | (0.56; 1.19) | 2.9E-01 |
| cg20701850 | GOLT1B    | chr12 | Body    | 1.21 | (0.85; 1.71) | 2.9E-01 |
| cg20701850 | RECQL     | chr12 | TSS1500 | 1.21 | (0.85; 1.71) | 2.9E-01 |
| cg22677723 | RTN4R     | chr22 | 3'UTR   | 0.84 | (0.61; 1.16) | 2.9E-01 |
| cg05884711 | ATP6V0C   | chr16 | TSS1500 | 1.25 | (0.82; 1.9)  | 2.9E-01 |
| cg14619203 | PHACTR1   | chr6  | Body    | 0.83 | (0.58; 1.18) | 2.9E-01 |
| cg22791545 | RTN4RL1   | chr17 | Body    | 1.29 | (0.8; 2.05)  | 2.9E-01 |
| cg03002689 | RTN4R     | chr22 | Body    | 1.41 | (0.74; 2.68) | 2.9E-01 |
| cg04580068 | UBE2E2    | chr3  | Body    | 1.17 | (0.87; 1.58) | 2.9E-01 |
| cg10566855 | PTPRN2    | chr7  | Body    | 1.18 | (0.86; 1.62) | 2.9E-01 |
| cg11890278 | NOL4      | chr18 | 5'UTR   | 1.26 | (0.82; 1.93) | 2.9E-01 |
| cg11890278 | NOL4      | chr18 | Body    | 1.26 | (0.82; 1.93) | 2.9E-01 |
| cg18876494 | RAP1B     | chr12 | TSS1500 | 1.19 | (0.86; 1.65) | 2.9E-01 |
| cg18644049 | RNU5E-1   | chr5  | Body    | 1.22 | (0.84; 1.76) | 2.9E-01 |
| cg11301337 | PTPRN2    | chr7  | Body    | 1.18 | (0.86; 1.62) | 2.9E-01 |
| cg21186888 | UNC80     | chr2  | Body    | 0.82 | (0.57; 1.18) | 2.9E-01 |
| cg07501283 | PTPRN2    | chr7  | Body    | 0.83 | (0.59; 1.17) | 2.9E-01 |
| cg21102737 | TSHZ3     | chr19 | Body    | 1.22 | (0.84; 1.78) | 2.9E-01 |
| cg00628091 | WVOX      | chr16 | Body    | 0.84 | (0.61; 1.16) | 2.9E-01 |
| cg12450779 | ATF7IP2   | chr16 | TSS1500 | 1.17 | (0.87; 1.57) | 2.9E-01 |
| cg08222607 | ALCAM     | chr3  | Body    | 0.71 | (0.38; 1.34) | 2.9E-01 |
| cg13808083 | BARX1     | chr9  | Body    | 1.22 | (0.84; 1.78) | 2.9E-01 |
| cg13108609 | ZBTB20    | chr3  | Body    | 1.22 | (0.84; 1.76) | 3.0E-01 |
| cg13108609 | ZBTB20    | chr3  | 5'UTR   | 1.22 | (0.84; 1.76) | 3.0E-01 |
| cg20705893 | PTPRN2    | chr7  | Body    | 0.83 | (0.59; 1.17) | 3.0E-01 |
| cg05601974 | SMARCD3   | chr7  | Body    | 1.2  | (0.86; 1.67) | 3.0E-01 |
| cg00577182 | BARX2     | chr11 | TSS1500 | 0.84 | (0.61; 1.16) | 3.0E-01 |
| cg06880494 | CNTNAP2   | chr7  | Body    | 1.23 | (0.84; 1.8)  | 3.0E-01 |
| cg10985810 | PTPRN2    | chr7  | Body    | 1.24 | (0.83; 1.87) | 3.0E-01 |
| cg02259284 | ALCAM     | chr3  | TSS200  | 0.86 | (0.64; 1.14) | 3.0E-01 |
| cg23453466 | PTPRN2    | chr7  | Body    | 0.84 | (0.61; 1.16) | 3.0E-01 |
| cg13368756 | CTNND2    | chr5  | TSS200  | 0.84 | (0.61; 1.17) | 3.0E-01 |
| cg11884933 | GNA12     | chr7  | Body    | 1.56 | (0.68; 3.57) | 3.0E-01 |
| cg21108811 | CACNA1C   | chr12 | Body    | 1.2  | (0.85; 1.67) | 3.0E-01 |
| cg09458443 | ATF7IP    | chr12 | TSS1500 | 1.17 | (0.87; 1.55) | 3.0E-01 |
| cg23921342 | CSMD2     | chr1  | Body    | 0.81 | (0.54; 1.2)  | 3.0E-01 |
| cg18552839 | ATF7      | chr12 | Body    | 0.84 | (0.6; 1.17)  | 3.0E-01 |



|               |                     |       |         |      |              |         |
|---------------|---------------------|-------|---------|------|--------------|---------|
| cg04923875    | <i>TNR</i>          | chr1  | 5'UTR   | 0.8  | (0.53; 1.22) | 3.0E-01 |
| cg03990984    | <i>ERI3</i>         | chr1  | 1stExon | 1.18 | (0.87; 1.61) | 3.0E-01 |
| cg03990984    | <i>ERI3</i>         | chr1  | 5'UTR   | 1.18 | (0.87; 1.61) | 3.0E-01 |
| cg01507577    | <i>CNTNAP2</i>      | chr7  | Body    | 1.21 | (0.85; 1.73) | 3.0E-01 |
| cg06109876    | <i>FBXO32</i>       | chr8  | TSS1500 | 0.84 | (0.61; 1.17) | 3.0E-01 |
| cg06109876    | <i>FBXO32</i>       | chr8  | Body    | 0.84 | (0.61; 1.17) | 3.0E-01 |
| cg26893445    | <i>AKAP13</i>       | chr15 | 5'UTR   | 1.19 | (0.86; 1.64) | 3.0E-01 |
| cg16269266    | <i>WVOX</i>         | chr16 | Body    | 1.37 | (0.76; 2.47) | 3.0E-01 |
| cg16289485    | <i>CUX2</i>         | chr12 | Body    | 0.84 | (0.61; 1.16) | 3.0E-01 |
| cg02296376    | <i>RTN4R</i>        | chr22 | Body    | 1.26 | (0.82; 1.93) | 3.0E-01 |
| cg19547192    | <i>PTPRN2</i>       | chr7  | Body    | 0.84 | (0.59; 1.17) | 3.0E-01 |
| cg21815508    | <i>PTPRN2</i>       | chr7  | Body    | 1.19 | (0.86; 1.63) | 3.0E-01 |
| cg23070487    | <i>TNFRSF10B</i>    | chr8  | Body    | 0.82 | (0.56; 1.19) | 3.0E-01 |
| cg22813585    | <i>TNRC6B</i>       | chr22 | Body    | 1.19 | (0.86; 1.66) | 3.0E-01 |
| cg23740652    | <i>PTPRN2</i>       | chr7  | Body    | 1.19 | (0.86; 1.64) | 3.0E-01 |
| cg07618675    | <i>CREBBP</i>       | chr16 | Body    | 1.23 | (0.83; 1.81) | 3.0E-01 |
| cg09081517    | <i>TNFRSF1B</i>     | chr1  | TSS1500 | 0.84 | (0.6; 1.17)  | 3.0E-01 |
| cg23808337    | <i>PTPRN2</i>       | chr7  | Body    | 1.21 | (0.85; 1.72) | 3.0E-01 |
| cg01656421    | <i>NOL4</i>         | chr18 | 5'UTR   | 0.81 | (0.55; 1.2)  | 3.0E-01 |
| cg01656421    | <i>NOL4</i>         | chr18 | Body    | 0.81 | (0.55; 1.2)  | 3.0E-01 |
| cg01656421    | <i>NOL4</i>         | chr18 | 1stExon | 0.81 | (0.55; 1.2)  | 3.0E-01 |
| cg04232325    | <i>SUSD4</i>        | chr1  | 5'UTR   | 0.85 | (0.62; 1.16) | 3.0E-01 |
| cg07511284    | <i>CSMD2</i>        | chr1  | ExonBnd | 1.29 | (0.8; 2.07)  | 3.0E-01 |
| cg07511284    | <i>CSMD2</i>        | chr1  | Body    | 1.29 | (0.8; 2.07)  | 3.0E-01 |
| cg02564299    | <i>ZBTB20</i>       | chr3  | 5'UTR   | 0.79 | (0.51; 1.23) | 3.0E-01 |
| cg07992625    | <i>ATF7</i>         | chr12 | TSS1500 | 0.82 | (0.56; 1.2)  | 3.0E-01 |
| cg19975403    | <i>CACNA1C</i>      | chr12 | Body    | 1.32 | (0.78; 2.25) | 3.0E-01 |
| cg16915316    | <i>CTDSP2</i>       | chr12 | Body    | 1.26 | (0.82; 1.94) | 3.0E-01 |
| cg19159466    | <i>FBXO32</i>       | chr8  | 5'UTR   | 0.84 | (0.6; 1.17)  | 3.0E-01 |
| cg19159466    | <i>FBXO32</i>       | chr8  | Body    | 0.84 | (0.6; 1.17)  | 3.0E-01 |
| cg20981107    | <i>PTPRU</i>        | chr1  | Body    | 1.22 | (0.84; 1.79) | 3.0E-01 |
| cg01290963    | <i>PTPRN2</i>       | chr7  | Body    | 0.85 | (0.62; 1.16) | 3.0E-01 |
| cg17164499    | <i>FBXO36</i>       | chr2  | Body    | 0.84 | (0.6; 1.17)  | 3.0E-01 |
| cg17316096    | <i>PTPRN2</i>       | chr7  | Body    | 1.19 | (0.86; 1.65) | 3.0E-01 |
| cg12229081    | <i>TNRC6A</i>       | chr16 | Body    | 1.16 | (0.88; 1.53) | 3.0E-01 |
| cg14286665    | <i>FBXO11</i>       | chr2  | TSS200  | 0.85 | (0.63; 1.15) | 3.0E-01 |
| cg01840508    | <i>LOC101928417</i> | chr16 | Body    | 1.17 | (0.87; 1.58) | 3.0E-01 |
| cg01840508    | <i>CDH13</i>        | chr16 | 5'UTR   | 1.17 | (0.87; 1.58) | 3.0E-01 |
| cg01840508    | <i>CDH13</i>        | chr16 | Body    | 1.17 | (0.87; 1.58) | 3.0E-01 |
| cg27649253    | <i>PTPRS</i>        | chr19 | Body    | 0.82 | (0.56; 1.19) | 3.0E-01 |
| cg03045425    | <i>NOL4</i>         | chr18 | TSS200  | 1.22 | (0.84; 1.79) | 3.0E-01 |
| cg03180552    | <i>PTPRN2</i>       | chr7  | Body    | 0.85 | (0.63; 1.15) | 3.0E-01 |
| cg13398482    | <i>BARX1</i>        | chr9  | Body    | 1.22 | (0.84; 1.77) | 3.0E-01 |
| cg20876466    | <i>PTPRN2</i>       | chr7  | Body    | 1.19 | (0.86; 1.64) | 3.0E-01 |
| cg09855155    | <i>TENM2</i>        | chr5  | Body    | 1.26 | (0.81; 1.96) | 3.0E-01 |
| cg25024676    | <i>TNFRSF19</i>     | chr13 | 5'UTR   | 1.2  | (0.85; 1.7)  | 3.0E-01 |
| cg25024676    | <i>TNFRSF19</i>     | chr13 | TSS200  | 1.2  | (0.85; 1.7)  | 3.0E-01 |
| cg01948671    | <i>ARID1A</i>       | chr1  | Body    | 0.84 | (0.61; 1.17) | 3.0E-01 |
| cg02226934    | <i>MTNR1A</i>       | chr4  | Body    | 0.84 | (0.61; 1.16) | 3.0E-01 |
| cg09108073    | <i>CDH11</i>        | chr16 | 5'UTR   | 0.84 | (0.61; 1.17) | 3.0E-01 |
| cg18712299    | <i>RNU5E-1</i>      | chr5  | Body    | 0.76 | (0.46; 1.28) | 3.0E-01 |
| cg23178546    | <i>PTPRN2</i>       | chr7  | Body    | 1.19 | (0.86; 1.64) | 3.0E-01 |
| cg06377417    | <i>NRXN1</i>        | chr2  | Body    | 0.78 | (0.49; 1.25) | 3.0E-01 |
| cg20194947    | <i>PTPRN2</i>       | chr7  | Body    | 0.85 | (0.62; 1.16) | 3.0E-01 |
| cg18748332    | <i>ATF7</i>         | chr12 | 1stExon | 1.18 | (0.86; 1.62) | 3.0E-01 |
| cg18748332    | <i>ATF7</i>         | chr12 | 5'UTR   | 1.18 | (0.86; 1.62) | 3.0E-01 |
| ch.4.1080479F | <i>DCUN1D4</i>      | chr4  | Body    | 1.2  | (0.85; 1.71) | 3.0E-01 |
| cg23042011    | <i>NRXN1</i>        | chr2  | 5'UTR   | 1.18 | (0.86; 1.62) | 3.0E-01 |
| cg24110408    | <i>MTCL1</i>        | chr18 | Body    | 1.31 | (0.79; 2.16) | 3.0E-01 |
| cg20583615    | <i>PTPRN2</i>       | chr7  | Body    | 1.22 | (0.84; 1.77) | 3.0E-01 |
| ch.1.1103899F | <i>CSMD2</i>        | chr1  | Body    | 0.85 | (0.63; 1.15) | 3.0E-01 |



|            |                  |       |         |      |              |         |
|------------|------------------|-------|---------|------|--------------|---------|
| cg16507511 | <i>FBXO33</i>    | chr14 | TSS1500 | 1.2  | (0.85; 1.72) | 3.0E-01 |
| cg22749535 | <i>TNR</i>       | chr1  | 5'UTR   | 0.84 | (0.61; 1.17) | 3.0E-01 |
| cg01818215 | <i>TNFRSF11A</i> | chr18 | Body    | 1.21 | (0.84; 1.75) | 3.0E-01 |
| cg01877778 | <i>PTPRN2</i>    | chr7  | Body    | 1.24 | (0.82; 1.89) | 3.0E-01 |
| cg00461841 | <i>ATF7IP2</i>   | chr16 | 5'UTR   | 1.2  | (0.85; 1.71) | 3.0E-01 |
| cg25065836 | <i>CACNA1C</i>   | chr12 | Body    | 0.85 | (0.63; 1.15) | 3.0E-01 |
| cg26019549 | <i>TNFRSF11B</i> | chr8  | Body    | 0.82 | (0.57; 1.19) | 3.0E-01 |
| cg17562433 | <i>DNAI2</i>     | chr17 | TSS1500 | 0.84 | (0.61; 1.17) | 3.0E-01 |
| cg00908526 | <i>CTNND2</i>    | chr5  | 5'UTR   | 1.25 | (0.82; 1.91) | 3.0E-01 |
| cg00908526 | <i>CTNND2</i>    | chr5  | 1stExon | 1.25 | (0.82; 1.91) | 3.0E-01 |
| cg24274272 | <i>DNAI2</i>     | chr17 | Body    | 0.84 | (0.6; 1.17)  | 3.0E-01 |
| cg27186436 | <i>TNRC6A</i>    | chr16 | Body    | 0.83 | (0.59; 1.18) | 3.0E-01 |
| cg25301776 | <i>WWOX</i>      | chr16 | Body    | 1.21 | (0.84; 1.73) | 3.0E-01 |
| cg16347412 | <i>PTPRN2</i>    | chr7  | Body    | 0.86 | (0.65; 1.14) | 3.0E-01 |
| cg24481303 | <i>PTPRN2</i>    | chr7  | Body    | 0.86 | (0.64; 1.15) | 3.0E-01 |
| cg03151187 | <i>BRUNOL4</i>   | chr18 | TSS1500 | 1.19 | (0.86; 1.64) | 3.0E-01 |
| cg14053575 | <i>CNTNAP2</i>   | chr7  | Body    | 1.25 | (0.82; 1.92) | 3.0E-01 |
| cg08084502 | <i>CPEB1</i>     | chr15 | Body    | 1.21 | (0.84; 1.72) | 3.0E-01 |
| cg08084502 | <i>CPEB1</i>     | chr15 | TSS200  | 1.21 | (0.84; 1.72) | 3.0E-01 |
| cg02789991 | <i>CDH13</i>     | chr16 | 5'UTR   | 0.83 | (0.59; 1.18) | 3.0E-01 |
| cg02789991 | <i>CDH13</i>     | chr16 | Body    | 0.83 | (0.59; 1.18) | 3.0E-01 |
| cg23186952 | <i>ZFP91</i>     | chr11 | Body    | 1.17 | (0.87; 1.59) | 3.1E-01 |
| cg00091633 | <i>FSTL1</i>     | chr3  | TSS1500 | 1.24 | (0.82; 1.88) | 3.1E-01 |
| cg14619832 | <i>TNRC6A</i>    | chr16 | Body    | 0.85 | (0.63; 1.15) | 3.1E-01 |
| cg02725153 | <i>SUGCT</i>     | chr7  | Body    | 1.18 | (0.86; 1.62) | 3.1E-01 |
| cg06167261 | <i>RTN4RL1</i>   | chr17 | Body    | 1.32 | (0.78; 2.22) | 3.1E-01 |
| cg23321841 | <i>CACNA1C</i>   | chr12 | 5'UTR   | 0.85 | (0.62; 1.16) | 3.1E-01 |
| cg23321841 | <i>CACNA1C</i>   | chr12 | TSS200  | 0.85 | (0.62; 1.16) | 3.1E-01 |
| cg23321841 | <i>CACNA1C</i>   | chr12 | 1stExon | 0.85 | (0.62; 1.16) | 3.1E-01 |
| cg16492510 | <i>PTPRN2</i>    | chr7  | Body    | 1.16 | (0.87; 1.55) | 3.1E-01 |
| cg11067956 | <i>CHCHD6</i>    | chr3  | Body    | 1.2  | (0.85; 1.69) | 3.1E-01 |
| cg24764310 | <i>PTPRN2</i>    | chr7  | Body    | 1.2  | (0.85; 1.68) | 3.1E-01 |
| cg10091135 | <i>CDH13</i>     | chr16 | ExonBnd | 1.17 | (0.87; 1.58) | 3.1E-01 |
| cg10091135 | <i>CDH13</i>     | chr16 | Body    | 1.17 | (0.87; 1.58) | 3.1E-01 |
| cg04456624 | <i>RECQL5</i>    | chr17 | 1stExon | 1.24 | (0.82; 1.86) | 3.1E-01 |
| cg04456624 | <i>RECQL5</i>    | chr17 | 5'UTR   | 1.24 | (0.82; 1.86) | 3.1E-01 |
| cg17638248 | <i>TNR</i>       | chr1  | 5'UTR   | 0.85 | (0.63; 1.16) | 3.1E-01 |
| cg13859468 | <i>CTNND2</i>    | chr5  | Body    | 0.71 | (0.37; 1.37) | 3.1E-01 |
| cg10134076 | <i>TNRC6A</i>    | chr16 | Body    | 0.85 | (0.62; 1.16) | 3.1E-01 |
| cg06905516 | <i>TNFRSF10D</i> | chr8  | TSS1500 | 1.21 | (0.84; 1.73) | 3.1E-01 |
| cg11815662 | <i>DCUN1D4</i>   | chr4  | Body    | 1.18 | (0.86; 1.62) | 3.1E-01 |
| cg11815662 | <i>DCUN1D4</i>   | chr4  | 5'UTR   | 1.18 | (0.86; 1.62) | 3.1E-01 |
| cg17708276 | <i>WWOX</i>      | chr16 | Body    | 0.69 | (0.33; 1.41) | 3.1E-01 |
| cg18751657 | <i>PTPRN2</i>    | chr7  | Body    | 1.23 | (0.83; 1.83) | 3.1E-01 |
| cg14839351 | <i>BRUNOL4</i>   | chr18 | TSS1500 | 0.8  | (0.52; 1.23) | 3.1E-01 |
| cg07357157 | <i>PEX14</i>     | chr1  | 3'UTR   | 1.19 | (0.85; 1.66) | 3.1E-01 |
| cg05673731 | <i>PTPRU</i>     | chr1  | Body    | 1.21 | (0.84; 1.75) | 3.1E-01 |
| cg11409923 | <i>RTN4RL1</i>   | chr17 | Body    | 1.21 | (0.84; 1.73) | 3.1E-01 |
| cg20931755 | <i>PTPRN2</i>    | chr7  | Body    | 0.84 | (0.61; 1.17) | 3.1E-01 |
| cg01451345 | <i>PTPRN2</i>    | chr7  | Body    | 0.83 | (0.59; 1.18) | 3.1E-01 |
| cg08279598 | <i>WAC</i>       | chr10 | Body    | 1.17 | (0.86; 1.6)  | 3.1E-01 |
| cg22779920 | <i>CHCHD6</i>    | chr3  | TSS200  | 1.19 | (0.85; 1.65) | 3.1E-01 |
| cg10767008 | <i>PTPRN2</i>    | chr7  | Body    | 0.86 | (0.64; 1.15) | 3.1E-01 |
| cg01402914 | <i>CACNA1C</i>   | chr12 | Body    | 1.17 | (0.86; 1.59) | 3.1E-01 |
| cg27112565 | <i>NRXN1</i>     | chr2  | 5'UTR   | 0.82 | (0.57; 1.2)  | 3.1E-01 |
| cg27112565 | <i>NRXN1</i>     | chr2  | 1stExon | 0.82 | (0.57; 1.2)  | 3.1E-01 |
| cg14047507 | <i>EIF2S1</i>    | chr14 | 5'UTR   | 1.17 | (0.86; 1.59) | 3.1E-01 |
| cg25109618 | <i>PTPRN2</i>    | chr7  | Body    | 1.18 | (0.85; 1.64) | 3.1E-01 |
| cg20482960 | <i>CNTNAP2</i>   | chr7  | Body    | 1.17 | (0.87; 1.57) | 3.1E-01 |
| cg26480662 | <i>PTPRN2</i>    | chr7  | Body    | 0.84 | (0.6; 1.17)  | 3.1E-01 |
| cg07151628 | <i>CHCHD6</i>    | chr3  | Body    | 0.84 | (0.59; 1.18) | 3.1E-01 |



|            |                  |       |         |      |              |         |
|------------|------------------|-------|---------|------|--------------|---------|
| cg22452170 | <i>PTPRN2</i>    | chr7  | Body    | 0.85 | (0.62; 1.17) | 3.1E-01 |
| cg04108625 | <i>CHCHD6</i>    | chr3  | Body    | 1.18 | (0.86; 1.63) | 3.1E-01 |
| cg20805920 | <i>PEX14</i>     | chr1  | TSS1500 | 0.83 | (0.58; 1.19) | 3.1E-01 |
| cg10635895 | <i>CACNA1C</i>   | chr12 | Body    | 1.23 | (0.83; 1.83) | 3.1E-01 |
| cg20448617 | <i>PTPRN2</i>    | chr7  | Body    | 1.16 | (0.87; 1.55) | 3.1E-01 |
| cg13212407 | <i>ATP8A1</i>    | chr4  | Body    | 0.78 | (0.48; 1.26) | 3.1E-01 |
| cg08735141 | <i>PTPRN2</i>    | chr7  | Body    | 0.85 | (0.62; 1.17) | 3.1E-01 |
| cg12095896 | <i>CACNA1C</i>   | chr12 | Body    | 1.24 | (0.82; 1.88) | 3.1E-01 |
| cg05530566 | <i>SCAF8</i>     | chr6  | Body    | 1.25 | (0.81; 1.92) | 3.1E-01 |
| cg00390450 | <i>CHCHD6</i>    | chr3  | Body    | 1.2  | (0.85; 1.69) | 3.1E-01 |
| cg13218485 | <i>PTPRN2</i>    | chr7  | Body    | 0.84 | (0.61; 1.17) | 3.1E-01 |
| cg04486617 | <i>BARX1</i>     | chr9  | Body    | 0.84 | (0.59; 1.18) | 3.1E-01 |
| cg16500501 | <i>CDH11</i>     | chr16 | 5'UTR   | 1.16 | (0.87; 1.56) | 3.1E-01 |
| cg24527964 | <i>TNRC6A</i>    | chr16 | Body    | 0.85 | (0.63; 1.16) | 3.1E-01 |
| cg19027571 | <i>CHFR</i>      | chr12 | Body    | 0.84 | (0.61; 1.17) | 3.1E-01 |
| cg00422626 | <i>RECQL5</i>    | chr17 | Body    | 1.23 | (0.82; 1.84) | 3.1E-01 |
| cg05824594 | <i>CACNA1C</i>   | chr12 | Body    | 0.73 | (0.39; 1.35) | 3.1E-01 |
| cg24842334 | <i>PTPRN2</i>    | chr7  | Body    | 0.64 | (0.27; 1.52) | 3.1E-01 |
| cg24628628 | <i>SGIP1</i>     | chr1  | Body    | 0.62 | (0.25; 1.56) | 3.1E-01 |
| cg26581964 | <i>WWOX</i>      | chr16 | Body    | 0.82 | (0.55; 1.21) | 3.1E-01 |
| cg03680150 | <i>NDUFA9</i>    | chr12 | TSS200  | 0.86 | (0.65; 1.15) | 3.1E-01 |
| cg12397349 | <i>RECQL5</i>    | chr17 | Body    | 1.18 | (0.86; 1.61) | 3.1E-01 |
| cg12260811 | <i>WWOX</i>      | chr16 | Body    | 1.44 | (0.71; 2.93) | 3.1E-01 |
| cg01878750 | <i>GNA12</i>     | chr7  | Body    | 1.17 | (0.86; 1.6)  | 3.1E-01 |
| cg11376375 | <i>SUSD4</i>     | chr1  | Body    | 1.19 | (0.85; 1.65) | 3.1E-01 |
| cg00364339 | <i>CHCHD6</i>    | chr3  | Body    | 1.2  | (0.84; 1.72) | 3.1E-01 |
| cg27469563 | <i>GNA12</i>     | chr7  | Body    | 1.19 | (0.85; 1.66) | 3.1E-01 |
| cg16934595 | <i>RTN4</i>      | chr2  | Body    | 1.35 | (0.76; 2.39) | 3.1E-01 |
| cg17017617 | <i>PTPRN2</i>    | chr7  | Body    | 0.83 | (0.57; 1.2)  | 3.1E-01 |
| cg13580286 | <i>TNFRSF10B</i> | chr8  | Body    | 0.75 | (0.42; 1.32) | 3.1E-01 |
| cg26708220 | <i>MEIS2</i>     | chr15 | Body    | 1.2  | (0.84; 1.71) | 3.1E-01 |
| cg11554724 | <i>CPEB1</i>     | chr15 | Body    | 1.23 | (0.83; 1.82) | 3.1E-01 |
| cg11554724 | <i>CPEB1</i>     | chr15 | TSS1500 | 1.23 | (0.83; 1.82) | 3.1E-01 |
| cg11554724 | <i>CPEB1</i>     | chr15 | 5'UTR   | 1.23 | (0.83; 1.82) | 3.1E-01 |
| cg23271831 | <i>COL1A2</i>    | chr7  | 5'UTR   | 1.2  | (0.84; 1.71) | 3.1E-01 |
| cg23271831 | <i>COL1A2</i>    | chr7  | 1stExon | 1.2  | (0.84; 1.71) | 3.1E-01 |
| cg00332659 | <i>WWOX</i>      | chr16 | TSS1500 | 0.77 | (0.47; 1.28) | 3.1E-01 |
| cg08500967 | <i>TNRC6A</i>    | chr16 | TSS1500 | 0.85 | (0.61; 1.17) | 3.1E-01 |
| cg00160667 | <i>PTPRU</i>     | chr1  | Body    | 0.85 | (0.62; 1.17) | 3.1E-01 |
| cg23438064 | <i>FBXO32</i>    | chr8  | Body    | 0.85 | (0.62; 1.16) | 3.1E-01 |
| cg00460589 | <i>PHACTR1</i>   | chr6  | Body    | 1.21 | (0.84; 1.74) | 3.1E-01 |
| cg23975251 | <i>PEX14</i>     | chr1  | Body    | 0.8  | (0.52; 1.23) | 3.1E-01 |
| cg23759393 | <i>PTPRN2</i>    | chr7  | Body    | 1.2  | (0.84; 1.69) | 3.1E-01 |
| cg03512750 | <i>PTPRN2</i>    | chr7  | Body    | 1.2  | (0.84; 1.72) | 3.1E-01 |
| cg06466689 | <i>NRXN1</i>     | chr2  | Body    | 0.86 | (0.63; 1.16) | 3.1E-01 |
| cg07806732 | <i>ERI3</i>      | chr1  | TSS1500 | 0.86 | (0.65; 1.15) | 3.1E-01 |
| cg17698922 | <i>CCDC80</i>    | chr3  | Body    | 1.34 | (0.76; 2.36) | 3.2E-01 |
| cg12032821 | <i>RTN4R</i>     | chr22 | TSS1500 | 1.22 | (0.83; 1.78) | 3.2E-01 |
| cg12518166 | <i>CPEB1</i>     | chr15 | TSS200  | 1.22 | (0.83; 1.78) | 3.2E-01 |
| cg12518166 | <i>CPEB1</i>     | chr15 | TSS1500 | 1.22 | (0.83; 1.78) | 3.2E-01 |
| cg01312837 | <i>CREBBP</i>    | chr16 | Body    | 0.8  | (0.53; 1.23) | 3.2E-01 |
| cg10397545 | <i>CTDSPL2</i>   | chr15 | TSS200  | 0.73 | (0.4; 1.35)  | 3.2E-01 |
| cg09003447 | <i>EIF2S1</i>    | chr14 | Body    | 1.21 | (0.83; 1.75) | 3.2E-01 |
| cg20884522 | <i>GNA12</i>     | chr7  | Body    | 1.17 | (0.86; 1.58) | 3.2E-01 |
| cg20884522 | <i>GNA12</i>     | chr7  | TSS200  | 1.17 | (0.86; 1.58) | 3.2E-01 |
| cg09830835 | <i>ELAVL4</i>    | chr1  | TSS1500 | 1.21 | (0.83; 1.76) | 3.2E-01 |
| cg09830835 | <i>ELAVL4</i>    | chr1  | Body    | 1.21 | (0.83; 1.76) | 3.2E-01 |
| cg01200493 | <i>CDH13</i>     | chr16 | 5'UTR   | 0.83 | (0.58; 1.19) | 3.2E-01 |
| cg01200493 | <i>CDH13</i>     | chr16 | Body    | 0.83 | (0.58; 1.19) | 3.2E-01 |
| cg05246498 | <i>CPEB1</i>     | chr15 | Body    | 0.85 | (0.62; 1.17) | 3.2E-01 |
| cg05246498 | <i>CPEB1</i>     | chr15 | 5'UTR   | 0.85 | (0.62; 1.17) | 3.2E-01 |



|            |                  |       |         |      |              |         |
|------------|------------------|-------|---------|------|--------------|---------|
| cg15340709 | <i>PTPRN2</i>    | chr7  | Body    | 0.84 | (0.6; 1.18)  | 3.2E-01 |
| cg01928675 | <i>CACNA1C</i>   | chr12 | Body    | 1.31 | (0.77; 2.23) | 3.2E-01 |
| cg12302985 | <i>TNFRSF10B</i> | chr8  | Body    | 0.84 | (0.59; 1.18) | 3.2E-01 |
| cg20819424 | <i>ALCAM</i>     | chr3  | Body    | 1.31 | (0.77; 2.2)  | 3.2E-01 |
| cg03609787 | <i>CTDSPL2</i>   | chr15 | TSS1500 | 0.85 | (0.62; 1.17) | 3.2E-01 |
| cg08775082 | <i>ATP6V0C</i>   | chr16 | Body    | 0.86 | (0.64; 1.15) | 3.2E-01 |
| cg24521688 | <i>CACNA1C</i>   | chr12 | Body    | 1.18 | (0.85; 1.65) | 3.2E-01 |
| cg05428864 | <i>CCDC80</i>    | chr3  | Body    | 0.74 | (0.42; 1.33) | 3.2E-01 |
| cg26042546 | <i>ZBTB20</i>    | chr3  | Body    | 0.79 | (0.5; 1.25)  | 3.2E-01 |
| cg26042546 | <i>ZBTB20</i>    | chr3  | 5'UTR   | 0.79 | (0.5; 1.25)  | 3.2E-01 |
| cg08546120 | <i>PTPRN2</i>    | chr7  | Body    | 0.85 | (0.61; 1.17) | 3.2E-01 |
| cg22367727 | <i>ZBTB20</i>    | chr3  | 5'UTR   | 0.85 | (0.62; 1.17) | 3.2E-01 |
| cg22367727 | <i>ZBTB20</i>    | chr3  | TSS200  | 0.85 | (0.62; 1.17) | 3.2E-01 |
| cg07007834 | <i>CHFR</i>      | chr12 | Body    | 1.2  | (0.84; 1.72) | 3.2E-01 |
| cg09605497 | <i>DMXL2</i>     | chr15 | Body    | 0.82 | (0.56; 1.21) | 3.2E-01 |
| cg06832862 | <i>NRXN1</i>     | chr2  | Body    | 0.83 | (0.58; 1.2)  | 3.2E-01 |
| cg11404544 | <i>ELAVL4</i>    | chr1  | TSS200  | 0.85 | (0.62; 1.17) | 3.2E-01 |
| cg11404544 | <i>ELAVL4</i>    | chr1  | Body    | 0.85 | (0.62; 1.17) | 3.2E-01 |
| cg08445694 | <i>SMARCD3</i>   | chr7  | 5'UTR   | 1.2  | (0.84; 1.74) | 3.2E-01 |
| cg09711814 | <i>PTPRN2</i>    | chr7  | Body    | 0.85 | (0.61; 1.17) | 3.2E-01 |
| cg14468481 | <i>PTPRN2</i>    | chr7  | Body    | 1.21 | (0.83; 1.77) | 3.2E-01 |
| cg23609219 | <i>TNFRSF11A</i> | chr18 | Body    | 1.28 | (0.78; 2.1)  | 3.2E-01 |
| cg09373298 | <i>CHCHD6</i>    | chr3  | Body    | 0.84 | (0.59; 1.19) | 3.2E-01 |
| cg18691626 | <i>ELAVL4</i>    | chr1  | TSS200  | 0.77 | (0.45; 1.29) | 3.2E-01 |
| cg18691626 | <i>ELAVL4</i>    | chr1  | Body    | 0.77 | (0.45; 1.29) | 3.2E-01 |
| cg25942611 | <i>SGIP1</i>     | chr1  | 5'UTR   | 0.83 | (0.58; 1.19) | 3.2E-01 |
| cg25942611 | <i>SGIP1</i>     | chr1  | 1stExon | 0.83 | (0.58; 1.19) | 3.2E-01 |
| cg25942611 | <i>SGIP1</i>     | chr1  | ExonBnd | 0.83 | (0.58; 1.19) | 3.2E-01 |
| cg06069441 | <i>PTPRN2</i>    | chr7  | Body    | 0.83 | (0.59; 1.19) | 3.2E-01 |
| cg04141008 | <i>CREBBP</i>    | chr16 | Body    | 1.23 | (0.82; 1.85) | 3.2E-01 |
| cg12526797 | <i>CDH13</i>     | chr16 | Body    | 1.18 | (0.85; 1.63) | 3.2E-01 |
| cg13484901 | <i>ATF7IP</i>    | chr12 | Body    | 0.85 | (0.61; 1.18) | 3.2E-01 |
| cg21455160 | <i>NRXN1</i>     | chr2  | Body    | 1.18 | (0.85; 1.65) | 3.2E-01 |
| cg16508857 | <i>WWOX</i>      | chr16 | TSS1500 | 1.17 | (0.86; 1.61) | 3.2E-01 |
| cg23700062 | <i>ORC4</i>      | chr2  | Body    | 0.83 | (0.58; 1.2)  | 3.2E-01 |
| cg03556972 | <i>TNFRSF19</i>  | chr13 | 3'UTR   | 1.3  | (0.77; 2.19) | 3.2E-01 |
| cg06152383 | <i>GNA12</i>     | chr7  | TSS1500 | 0.85 | (0.62; 1.17) | 3.2E-01 |
| cg01316816 | <i>RTN4</i>      | chr2  | TSS200  | 1.15 | (0.87; 1.52) | 3.2E-01 |
| cg01316816 | <i>RTN4</i>      | chr2  | Body    | 1.15 | (0.87; 1.52) | 3.2E-01 |
| cg19190293 | <i>ZBTB20</i>    | chr3  | Body    | 0.85 | (0.61; 1.17) | 3.2E-01 |
| cg19190293 | <i>ZBTB20</i>    | chr3  | 5'UTR   | 0.85 | (0.61; 1.17) | 3.2E-01 |
| cg13527887 | <i>CHCHD6</i>    | chr3  | Body    | 1.26 | (0.8; 1.98)  | 3.2E-01 |
| cg25941682 | <i>PDE8A</i>     | chr15 | Body    | 0.83 | (0.58; 1.2)  | 3.2E-01 |
| cg10161888 | <i>PTPRN2</i>    | chr7  | Body    | 1.15 | (0.87; 1.53) | 3.2E-01 |
| cg23249868 | <i>GNA12</i>     | chr7  | Body    | 1.2  | (0.84; 1.73) | 3.2E-01 |
| cg22589505 | <i>AKAP3</i>     | chr12 | 5'UTR   | 0.81 | (0.53; 1.23) | 3.2E-01 |
| cg22589505 | <i>NDUFA9</i>    | chr12 | TSS200  | 0.81 | (0.53; 1.23) | 3.2E-01 |
| cg22589505 | <i>AKAP3</i>     | chr12 | 1stExon | 0.81 | (0.53; 1.23) | 3.2E-01 |
| cg17690002 | <i>SMARCD3</i>   | chr7  | 5'UTR   | 1.28 | (0.79; 2.08) | 3.2E-01 |
| cg05797732 | <i>WAC</i>       | chr10 | 3'UTR   | 1.28 | (0.79; 2.06) | 3.2E-01 |
| cg05797732 | <i>WAC</i>       | chr10 | Body    | 1.28 | (0.79; 2.06) | 3.2E-01 |
| cg12061285 | <i>PTPRS</i>     | chr19 | Body    | 1.19 | (0.85; 1.67) | 3.2E-01 |
| cg17680773 | <i>ATF7IP2</i>   | chr16 | TSS200  | 1.16 | (0.87; 1.54) | 3.2E-01 |
| cg06378561 | <i>FSTL1</i>     | chr3  | Body    | 0.85 | (0.62; 1.17) | 3.2E-01 |
| cg02376163 | <i>FBXO38</i>    | chr5  | TSS1500 | 0.85 | (0.61; 1.17) | 3.2E-01 |
| cg10919624 | <i>PTPRN2</i>    | chr7  | Body    | 1.15 | (0.87; 1.53) | 3.2E-01 |
| cg02989376 | <i>MBD5</i>      | chr2  | 5'UTR   | 0.82 | (0.56; 1.21) | 3.2E-01 |
| cg19698099 | <i>COL5A2</i>    | chr2  | 3'UTR   | 1.23 | (0.82; 1.84) | 3.2E-01 |
| cg02557661 | <i>TNRC6B</i>    | chr22 | Body    | 1.17 | (0.86; 1.6)  | 3.2E-01 |
| cg23094620 | <i>RTN4RL1</i>   | chr17 | Body    | 1.18 | (0.85; 1.66) | 3.2E-01 |
| cg03047070 | <i>CACNA1C</i>   | chr12 | Body    | 1.19 | (0.84; 1.69) | 3.2E-01 |



|            |              |       |         |      |              |         |
|------------|--------------|-------|---------|------|--------------|---------|
| cg20407496 | AKAP13       | chr15 | Body    | 1.17 | (0.86; 1.59) | 3.2E-01 |
| cg13293287 | PTPRN2       | chr7  | Body    | 1.27 | (0.79; 2.02) | 3.2E-01 |
| cg12687212 | PHACTR1      | chr6  | Body    | 1.18 | (0.85; 1.64) | 3.2E-01 |
| cg08219938 | RTN4RL1      | chr17 | Body    | 1.23 | (0.82; 1.83) | 3.2E-01 |
| cg12382670 | CSMD2        | chr1  | Body    | 0.83 | (0.57; 1.2)  | 3.2E-01 |
| cg09742643 | PTPRN2       | chr7  | Body    | 1.17 | (0.86; 1.6)  | 3.2E-01 |
| cg03647563 | PHACTR1      | chr6  | Body    | 1.21 | (0.83; 1.75) | 3.2E-01 |
| cg00740465 | PTPRN2       | chr7  | Body    | 1.17 | (0.86; 1.58) | 3.2E-01 |
| cg01301138 | CDH13        | chr16 | 1stExon | 0.8  | (0.52; 1.24) | 3.2E-01 |
| cg01301138 | CDH13        | chr16 | 5'UTR   | 0.8  | (0.52; 1.24) | 3.2E-01 |
| cg27245416 | ARID1A       | chr1  | Body    | 0.86 | (0.64; 1.16) | 3.2E-01 |
| cg00784759 | DNAI2        | chr17 | TSS1500 | 1.2  | (0.84; 1.73) | 3.2E-01 |
| cg09215560 | TNR          | chr1  | Body    | 1.29 | (0.78; 2.14) | 3.2E-01 |
| cg09291982 | ZBTB20       | chr3  | Body    | 0.86 | (0.63; 1.16) | 3.2E-01 |
| cg02977575 | MEX3A        | chr1  | Body    | 1.22 | (0.83; 1.79) | 3.2E-01 |
| cg24655135 | BRUNOL4      | chr18 | Body    | 0.8  | (0.52; 1.24) | 3.2E-01 |
| cg23371106 | CNTNAP2      | chr7  | Body    | 1.2  | (0.84; 1.71) | 3.2E-01 |
| cg06138257 | CHFR         | chr12 | 3'UTR   | 1.16 | (0.86; 1.57) | 3.2E-01 |
| cg11447650 | CNTNAP2      | chr7  | Body    | 1.21 | (0.83; 1.76) | 3.2E-01 |
| cg06715755 | PTPRN2       | chr7  | Body    | 0.84 | (0.59; 1.19) | 3.2E-01 |
| cg11283642 | CHD6         | chr20 | Body    | 1.47 | (0.69; 3.14) | 3.2E-01 |
| cg09334240 | ATF7         | chr12 | Body    | 1.2  | (0.84; 1.72) | 3.2E-01 |
| cg01782633 | MTCL1        | chr18 | 1stExon | 1.31 | (0.77; 2.25) | 3.2E-01 |
| cg01782633 | MTCL1        | chr18 | 5'UTR   | 1.31 | (0.77; 2.25) | 3.2E-01 |
| cg14150023 | TNRC6B       | chr22 | 3'UTR   | 0.79 | (0.49; 1.27) | 3.2E-01 |
| cg09166345 | ERI3         | chr1  | TSS200  | 0.85 | (0.61; 1.18) | 3.2E-01 |
| cg11739924 | TNRC6A       | chr16 | Body    | 0.86 | (0.64; 1.16) | 3.2E-01 |
| cg15302296 | TNFRSF10C    | chr8  | TSS200  | 1.25 | (0.8; 1.94)  | 3.2E-01 |
| cg02943303 | TXNDC9       | chr2  | TSS200  | 0.86 | (0.64; 1.16) | 3.2E-01 |
| cg21579828 | ACVR2A       | chr2  | TSS1500 | 1.2  | (0.83; 1.74) | 3.2E-01 |
| cg15109851 | FSTL1        | chr3  | 5'UTR   | 0.86 | (0.63; 1.17) | 3.2E-01 |
| cg15109851 | FSTL1        | chr3  | 1stExon | 0.86 | (0.63; 1.17) | 3.2E-01 |
| cg19459342 | CACNA1C      | chr12 | Body    | 0.66 | (0.29; 1.5)  | 3.2E-01 |
| cg08393822 | UNC80        | chr2  | Body    | 0.85 | (0.62; 1.17) | 3.2E-01 |
| cg23227881 | WWOX         | chr16 | Body    | 1.21 | (0.83; 1.76) | 3.3E-01 |
| cg01795053 | PTPRS        | chr19 | Body    | 1.19 | (0.84; 1.68) | 3.3E-01 |
| cg05358528 | PTPRN2       | chr7  | Body    | 1.2  | (0.83; 1.73) | 3.3E-01 |
| cg07509001 | PTPRS        | chr19 | Body    | 0.85 | (0.62; 1.17) | 3.3E-01 |
| cg02381687 | PHACTR1      | chr6  | Body    | 1.62 | (0.62; 4.27) | 3.3E-01 |
| cg12931148 | RTN4R        | chr22 | Body    | 0.69 | (0.34; 1.44) | 3.3E-01 |
| cg08924230 | PTPRN2       | chr7  | Body    | 1.21 | (0.83; 1.77) | 3.3E-01 |
| cg04188238 | MTNR1A       | chr4  | TSS1500 | 0.87 | (0.65; 1.15) | 3.3E-01 |
| cg22027930 | LOC101928700 | chr7  | TSS200  | 1.19 | (0.84; 1.69) | 3.3E-01 |
| cg22027930 | CNTNAP2      | chr7  | Body    | 1.19 | (0.84; 1.69) | 3.3E-01 |
| cg26403347 | CSMD2        | chr1  | Body    | 1.15 | (0.87; 1.54) | 3.3E-01 |
| cg16126084 | ZBTB20       | chr3  | Body    | 1.2  | (0.83; 1.73) | 3.3E-01 |
| cg16126084 | ZBTB20       | chr3  | 1stExon | 1.2  | (0.83; 1.73) | 3.3E-01 |
| cg16126084 | ZBTB20       | chr3  | 5'UTR   | 1.2  | (0.83; 1.73) | 3.3E-01 |
| cg04532849 | ELAVL4       | chr1  | Body    | 0.85 | (0.61; 1.18) | 3.3E-01 |
| cg06244990 | TNFRSF10B    | chr8  | Body    | 0.77 | (0.46; 1.29) | 3.3E-01 |
| cg21307628 | CCDC80       | chr3  | TSS1500 | 0.83 | (0.58; 1.2)  | 3.3E-01 |
| cg02468320 | CACNA1C      | chr12 | Body    | 0.8  | (0.51; 1.25) | 3.3E-01 |
| cg19642026 | ATP6V0C      | chr16 | Body    | 0.83 | (0.57; 1.2)  | 3.3E-01 |
| cg19642026 | ATP6V0C      | chr16 | 1stExon | 0.83 | (0.57; 1.2)  | 3.3E-01 |
| cg07529930 | PTPRN2       | chr7  | Body    | 1.16 | (0.86; 1.57) | 3.3E-01 |
| cg25312880 | PTPRS        | chr19 | Body    | 0.84 | (0.6; 1.19)  | 3.3E-01 |
| cg26369558 | TNR          | chr1  | 5'UTR   | 0.83 | (0.57; 1.21) | 3.3E-01 |
| cg15751214 | PHACTR1      | chr6  | Body    | 0.85 | (0.61; 1.18) | 3.3E-01 |
| cg09847415 | TNRC6B       | chr22 | Body    | 1.2  | (0.83; 1.74) | 3.3E-01 |
| cg06242102 | PTPRN2       | chr7  | Body    | 1.18 | (0.85; 1.65) | 3.3E-01 |
| cg16198225 | CDH13        | chr16 | 5'UTR   | 0.85 | (0.61; 1.18) | 3.3E-01 |



|            |                    |       |         |      |              |         |
|------------|--------------------|-------|---------|------|--------------|---------|
| cg16198225 | <i>CDH13</i>       | chr16 | Body    | 0.85 | (0.61; 1.18) | 3.3E-01 |
| cg24826512 | <i>SUGCT</i>       | chr7  | Body    | 0.84 | (0.6; 1.19)  | 3.3E-01 |
| cg18846554 | <i>FBXO34</i>      | chr14 | TSS200  | 0.85 | (0.62; 1.17) | 3.3E-01 |
| cg18846554 | <i>FBXO34</i>      | chr14 | 5'UTR   | 0.85 | (0.62; 1.17) | 3.3E-01 |
| cg10041241 | <i>NOL4</i>        | chr18 | 5'UTR   | 0.85 | (0.61; 1.18) | 3.3E-01 |
| cg10041241 | <i>NOL4</i>        | chr18 | Body    | 0.85 | (0.61; 1.18) | 3.3E-01 |
| cg06171022 | <i>CUX2</i>        | chr12 | Body    | 1.19 | (0.84; 1.67) | 3.3E-01 |
| cg08798492 | <i>TNFRSF12A</i>   | chr16 | TSS200  | 0.85 | (0.61; 1.18) | 3.3E-01 |
| cg03482339 | <i>DDHD2</i>       | chr8  | TSS1500 | 0.85 | (0.62; 1.18) | 3.3E-01 |
| cg03482339 | <i>DDHD2</i>       | chr8  | TSS200  | 0.85 | (0.62; 1.18) | 3.3E-01 |
| cg05952630 | <i>TNRC6B</i>      | chr22 | 5'UTR   | 1.17 | (0.85; 1.61) | 3.3E-01 |
| cg07184142 | <i>PTPRN2</i>      | chr7  | Body    | 0.85 | (0.61; 1.18) | 3.3E-01 |
| cg00532455 | <i>ACVR2A</i>      | chr2  | Body    | 0.84 | (0.59; 1.2)  | 3.3E-01 |
| cg11166463 | <i>RNU5E-1</i>     | chr5  | Body    | 1.17 | (0.86; 1.6)  | 3.3E-01 |
| cg07529754 | <i>NRXN1</i>       | chr2  | Body    | 1.22 | (0.82; 1.81) | 3.3E-01 |
| cg07529754 | <i>NRXN1</i>       | chr2  | TSS1500 | 1.22 | (0.82; 1.81) | 3.3E-01 |
| cg11567001 | <i>SMARCD3</i>     | chr7  | Body    | 0.86 | (0.63; 1.17) | 3.3E-01 |
| cg03125463 | <i>PTPRN2</i>      | chr7  | Body    | 0.85 | (0.61; 1.18) | 3.3E-01 |
| cg00280111 | <i>NOL4L</i>       | chr20 | Body    | 0.58 | (0.19; 1.74) | 3.3E-01 |
| cg00280111 | <i>NOL4L</i>       | chr20 | 5'UTR   | 0.58 | (0.19; 1.74) | 3.3E-01 |
| cg27190024 | <i>COL1A2</i>      | chr7  | Body    | 0.84 | (0.58; 1.2)  | 3.3E-01 |
| cg06173857 | <i>GNA12</i>       | chr7  | Body    | 0.84 | (0.6; 1.19)  | 3.3E-01 |
| cg14982665 | <i>CACNA1C</i>     | chr12 | Body    | 0.85 | (0.61; 1.18) | 3.3E-01 |
| cg10994370 | <i>MTCL1</i>       | chr18 | Body    | 0.87 | (0.66; 1.15) | 3.3E-01 |
| cg11658190 | <i>RNU5E-1</i>     | chr5  | Body    | 1.22 | (0.82; 1.83) | 3.3E-01 |
| cg00004175 | <i>CACNA1C-AS4</i> | chr12 | TSS1500 | 0.85 | (0.6; 1.19)  | 3.3E-01 |
| cg00004175 | <i>CACNA1C</i>     | chr12 | Body    | 0.85 | (0.6; 1.19)  | 3.3E-01 |
| cg18804920 | <i>CNTNAP2</i>     | chr7  | Body    | 0.81 | (0.54; 1.23) | 3.3E-01 |
| cg04498153 | <i>PTPRN2</i>      | chr7  | Body    | 1.19 | (0.84; 1.68) | 3.3E-01 |
| cg16924704 | <i>SRSF10</i>      | chr1  | TSS1500 | 0.85 | (0.62; 1.18) | 3.3E-01 |
| cg23234828 | <i>FBXO34</i>      | chr14 | Body    | 1.2  | (0.83; 1.72) | 3.3E-01 |
| cg05530629 | <i>FBXO32</i>      | chr8  | TSS1500 | 1.18 | (0.85; 1.63) | 3.3E-01 |
| cg17360674 | <i>ATP6V0C</i>     | chr16 | 3'UTR   | 0.87 | (0.65; 1.15) | 3.3E-01 |
| cg08863654 | <i>PTPRN2</i>      | chr7  | Body    | 0.84 | (0.6; 1.19)  | 3.3E-01 |
| cg07968535 | <i>TNR</i>         | chr1  | 5'UTR   | 0.84 | (0.59; 1.19) | 3.3E-01 |
| cg12046677 | <i>CACNA1C</i>     | chr12 | Body    | 0.76 | (0.44; 1.32) | 3.3E-01 |
| cg26592247 | <i>MTCL1</i>       | chr18 | Body    | 0.83 | (0.56; 1.21) | 3.3E-01 |
| cg11551879 | <i>CUX2</i>        | chr12 | Body    | 1.23 | (0.81; 1.86) | 3.3E-01 |
| cg00335360 | <i>CACNA1C</i>     | chr12 | Body    | 0.73 | (0.39; 1.37) | 3.3E-01 |
| cg05092387 | <i>MEIS2</i>       | chr15 | Body    | 1.18 | (0.84; 1.65) | 3.3E-01 |
| cg11529567 | <i>FBXO36</i>      | chr2  | Body    | 1.18 | (0.84; 1.65) | 3.3E-01 |
| cg07747924 | <i>WWOX</i>        | chr16 | Body    | 0.86 | (0.63; 1.17) | 3.3E-01 |
| cg14145908 | <i>CACNA1C</i>     | chr12 | 5'UTR   | 0.83 | (0.58; 1.2)  | 3.3E-01 |
| cg14145908 | <i>CACNA1C</i>     | chr12 | 1stExon | 0.83 | (0.58; 1.2)  | 3.3E-01 |
| cg26301690 | <i>ELAVL4</i>      | chr1  | 1stExon | 0.7  | (0.35; 1.43) | 3.3E-01 |
| cg26301690 | <i>ELAVL4</i>      | chr1  | 5'UTR   | 0.7  | (0.35; 1.43) | 3.3E-01 |
| cg26301690 | <i>ELAVL4</i>      | chr1  | Body    | 0.7  | (0.35; 1.43) | 3.3E-01 |
| cg22839114 | <i>RAP1B</i>       | chr12 | 5'UTR   | 1.21 | (0.82; 1.79) | 3.3E-01 |
| cg04423621 | <i>CDH13</i>       | chr16 | Body    | 1.18 | (0.84; 1.65) | 3.3E-01 |
| cg11401957 | <i>CSMD2</i>       | chr1  | Body    | 0.85 | (0.6; 1.19)  | 3.3E-01 |
| cg07909897 | <i>PTPRN2</i>      | chr7  | Body    | 0.86 | (0.62; 1.17) | 3.3E-01 |
| cg04127606 | <i>PTPRN2</i>      | chr7  | Body    | 1.19 | (0.83; 1.71) | 3.3E-01 |
| cg02684143 | <i>PTPRN2</i>      | chr7  | Body    | 1.21 | (0.83; 1.76) | 3.3E-01 |
| cg00973426 | <i>PTPRN2</i>      | chr7  | TSS200  | 1.17 | (0.85; 1.61) | 3.3E-01 |
| cg12711746 | <i>CREBBP</i>      | chr16 | Body    | 1.18 | (0.84; 1.66) | 3.3E-01 |
| cg07112090 | <i>NRXN1</i>       | chr2  | Body    | 0.85 | (0.62; 1.18) | 3.3E-01 |
| cg27222147 | <i>CACNA1C</i>     | chr12 | Body    | 1.34 | (0.74; 2.41) | 3.3E-01 |
| cg05569793 | <i>MEIS2</i>       | chr15 | Body    | 1.18 | (0.84; 1.65) | 3.3E-01 |
| cg02925240 | <i>PTPRN2</i>      | chr7  | Body    | 0.85 | (0.6; 1.19)  | 3.3E-01 |
| cg26691179 | <i>WWOX</i>        | chr16 | Body    | 1.19 | (0.84; 1.7)  | 3.3E-01 |
| cg18099850 | <i>TNFRSF10D</i>   | chr8  | 3'UTR   | 1.19 | (0.84; 1.67) | 3.3E-01 |



|            |             |       |         |      |              |         |
|------------|-------------|-------|---------|------|--------------|---------|
| cg01895549 | CACNA1C     | chr12 | Body    | 0.61 | (0.22; 1.66) | 3.3E-01 |
| cg07001857 | FBXO34      | chr14 | 5'UTR   | 0.84 | (0.58; 1.2)  | 3.3E-01 |
| cg06930902 | FBXO11      | chr2  | Body    | 0.83 | (0.57; 1.21) | 3.3E-01 |
| cg11103255 | MTCL1       | chr18 | Body    | 1.17 | (0.85; 1.59) | 3.3E-01 |
| cg18062778 | PTPRS       | chr19 | Body    | 1.2  | (0.83; 1.75) | 3.3E-01 |
| cg11805946 | PTPRN2      | chr7  | Body    | 0.85 | (0.61; 1.18) | 3.3E-01 |
| cg24301028 | CNTNAP2     | chr7  | Body    | 1.2  | (0.83; 1.72) | 3.3E-01 |
| cg02250900 | DMXL2       | chr15 | TSS1500 | 0.85 | (0.61; 1.18) | 3.3E-01 |
| cg18532105 | ZBTB20      | chr3  | Body    | 0.85 | (0.61; 1.18) | 3.3E-01 |
| cg01445580 | CSMD2       | chr1  | TSS1500 | 0.82 | (0.54; 1.23) | 3.3E-01 |
| cg00423443 | CDH13       | chr16 | TSS1500 | 0.84 | (0.59; 1.2)  | 3.3E-01 |
| cg02024077 | CNTNAP2     | chr7  | TSS1500 | 1.15 | (0.87; 1.53) | 3.3E-01 |
| cg24337193 | ERI3        | chr1  | Body    | 1.2  | (0.83; 1.76) | 3.3E-01 |
| cg11909640 | PTPRN2      | chr7  | Body    | 0.81 | (0.53; 1.24) | 3.4E-01 |
| cg24476529 | CACNA1C-IT2 | chr12 | TSS200  | 0.8  | (0.5; 1.27)  | 3.4E-01 |
| cg19013611 | PTPRN2      | chr7  | Body    | 1.17 | (0.85; 1.61) | 3.4E-01 |
| cg13629270 | CHD6        | chr20 | 5'UTR   | 1.18 | (0.84; 1.64) | 3.4E-01 |
| cg11478896 | GNA12       | chr7  | Body    | 0.85 | (0.6; 1.19)  | 3.4E-01 |
| cg26061357 | SMARCD3     | chr7  | Body    | 0.85 | (0.61; 1.18) | 3.4E-01 |
| cg18004701 | PTPRN2      | chr7  | Body    | 0.84 | (0.6; 1.19)  | 3.4E-01 |
| cg02314835 | DMXL2       | chr15 | Body    | 1.16 | (0.86; 1.57) | 3.4E-01 |
| cg02076254 | MBD5        | chr2  | 5'UTR   | 1.18 | (0.84; 1.65) | 3.4E-01 |
| cg10971127 | CTDSP2      | chr12 | Body    | 0.84 | (0.6; 1.19)  | 3.4E-01 |
| cg11374656 | PTPRN2      | chr7  | Body    | 1.2  | (0.82; 1.76) | 3.4E-01 |
| cg04351698 | CSMD2       | chr1  | Body    | 1.19 | (0.83; 1.7)  | 3.4E-01 |
| cg00534540 | PTPRN2      | chr7  | Body    | 1.2  | (0.83; 1.75) | 3.4E-01 |
| cg20094343 | BRUNOL4     | chr18 | Body    | 1.15 | (0.87; 1.52) | 3.4E-01 |
| cg08710739 | CUX2        | chr12 | TSS1500 | 1.15 | (0.86; 1.55) | 3.4E-01 |
| cg08406486 | CUX2        | chr12 | Body    | 0.78 | (0.47; 1.29) | 3.4E-01 |
| cg17341361 | TNRC18      | chr7  | Body    | 1.23 | (0.81; 1.86) | 3.4E-01 |
| cg19802579 | MTCL1       | chr18 | Body    | 0.79 | (0.49; 1.28) | 3.4E-01 |
| cg14706575 | RTN4        | chr2  | TSS1500 | 0.79 | (0.5; 1.27)  | 3.4E-01 |
| cg14706575 | RTN4        | chr2  | 1stExon | 0.79 | (0.5; 1.27)  | 3.4E-01 |
| cg14706575 | RTN4        | chr2  | 5'UTR   | 0.79 | (0.5; 1.27)  | 3.4E-01 |
| cg10219352 | TAOK3       | chr12 | Body    | 1.23 | (0.8; 1.9)   | 3.4E-01 |
| cg05229655 | NOL4        | chr18 | Body    | 0.82 | (0.54; 1.23) | 3.4E-01 |
| cg13403271 | PTPRN2      | chr7  | Body    | 0.82 | (0.54; 1.24) | 3.4E-01 |
| cg01329098 | RTN4        | chr2  | Body    | 0.85 | (0.61; 1.18) | 3.4E-01 |
| cg26085232 | CACNA1C     | chr12 | Body    | 0.8  | (0.5; 1.27)  | 3.4E-01 |
| cg26693584 | WWOX        | chr16 | Body    | 1.2  | (0.82; 1.76) | 3.4E-01 |
| cg07415354 | SUGCT       | chr7  | Body    | 0.85 | (0.61; 1.19) | 3.4E-01 |
| cg08049838 | CTDSP2      | chr12 | 1stExon | 0.86 | (0.63; 1.17) | 3.4E-01 |
| cg08049838 | CTDSP2      | chr12 | 5'UTR   | 0.86 | (0.63; 1.17) | 3.4E-01 |
| cg17984508 | CHFR        | chr12 | Body    | 0.87 | (0.65; 1.16) | 3.4E-01 |
| cg18311871 | PTPRN2      | chr7  | Body    | 1.17 | (0.85; 1.61) | 3.4E-01 |
| cg06679089 | TNRC6B      | chr22 | 5'UTR   | 0.83 | (0.57; 1.21) | 3.4E-01 |
| cg16386051 | ATP8A1      | chr4  | Body    | 1.17 | (0.84; 1.63) | 3.4E-01 |
| cg09700337 | TAOK3       | chr12 | 5'UTR   | 1.19 | (0.83; 1.7)  | 3.4E-01 |
| cg24500294 | PTPRN2      | chr7  | Body    | 0.83 | (0.56; 1.22) | 3.4E-01 |
| cg15316150 | CTNND2      | chr5  | Body    | 0.84 | (0.59; 1.2)  | 3.4E-01 |
| cg15316150 | CTNND2      | chr5  | 5'UTR   | 0.84 | (0.59; 1.2)  | 3.4E-01 |
| cg12986253 | MTCL1       | chr18 | Body    | 1.2  | (0.83; 1.74) | 3.4E-01 |
| cg01644731 | CTDSP2      | chr12 | Body    | 1.18 | (0.84; 1.66) | 3.4E-01 |
| cg10135034 | TAOK3       | chr12 | Body    | 1.17 | (0.85; 1.6)  | 3.4E-01 |
| cg27656074 | PTPRN2      | chr7  | Body    | 1.16 | (0.85; 1.58) | 3.4E-01 |
| cg21859000 | RNU5E-1     | chr5  | Body    | 1.21 | (0.82; 1.79) | 3.4E-01 |
| cg16733997 | PTPRN2      | chr7  | Body    | 0.83 | (0.56; 1.22) | 3.4E-01 |
| cg05471602 | BARX2       | chr11 | Body    | 1.16 | (0.86; 1.57) | 3.4E-01 |
| cg20116468 | PTPRN2      | chr7  | Body    | 1.16 | (0.85; 1.59) | 3.4E-01 |
| cg09400152 | CPEB1       | chr15 | Body    | 0.85 | (0.61; 1.19) | 3.4E-01 |
| cg09423231 | NRXN1       | chr2  | Body    | 0.72 | (0.37; 1.41) | 3.4E-01 |



|            |                 |       |         |      |              |         |
|------------|-----------------|-------|---------|------|--------------|---------|
| cg20808813 | <i>PTPRN2</i>   | chr7  | Body    | 0.83 | (0.57; 1.22) | 3.4E-01 |
| cg06798451 | <i>CHCHD6</i>   | chr3  | Body    | 0.85 | (0.62; 1.18) | 3.4E-01 |
| cg09896686 | <i>CTNND2</i>   | chr5  | Body    | 0.86 | (0.63; 1.17) | 3.4E-01 |
| cg09604062 | <i>SRSF10</i>   | chr1  | Body    | 0.85 | (0.61; 1.19) | 3.4E-01 |
| cg09604062 | <i>SRSF10</i>   | chr1  | 5'UTR   | 0.85 | (0.61; 1.19) | 3.4E-01 |
| cg09604062 | <i>SRSF10</i>   | chr1  | 1stExon | 0.85 | (0.61; 1.19) | 3.4E-01 |
| cg00501467 | <i>PHACTR1</i>  | chr6  | Body    | 0.85 | (0.61; 1.18) | 3.4E-01 |
| cg10653131 | <i>TNFRSF19</i> | chr13 | 5'UTR   | 1.22 | (0.81; 1.86) | 3.4E-01 |
| cg17256791 | <i>PDE8A</i>    | chr15 | 5'UTR   | 1.18 | (0.84; 1.65) | 3.4E-01 |
| cg17256791 | <i>PDE8A</i>    | chr15 | Body    | 1.18 | (0.84; 1.65) | 3.4E-01 |
| cg10418410 | <i>CACNA1C</i>  | chr12 | Body    | 1.3  | (0.76; 2.22) | 3.4E-01 |
| cg11392780 | <i>PTPRN2</i>   | chr7  | Body    | 0.85 | (0.61; 1.19) | 3.4E-01 |
| cg17109865 | <i>CREBBP</i>   | chr16 | Body    | 1.41 | (0.69; 2.88) | 3.4E-01 |
| cg15627078 | <i>TNFRSF19</i> | chr13 | 5'UTR   | 1.17 | (0.85; 1.61) | 3.4E-01 |
| cg15627078 | <i>TNFRSF19</i> | chr13 | TSS200  | 1.17 | (0.85; 1.61) | 3.4E-01 |
| cg27407707 | <i>TNRC6A</i>   | chr16 | TSS200  | 0.85 | (0.61; 1.19) | 3.4E-01 |
| cg17410174 | <i>CTNND2</i>   | chr5  | Body    | 0.83 | (0.57; 1.22) | 3.4E-01 |
| cg25029446 | <i>PTPRN2</i>   | chr7  | Body    | 0.86 | (0.64; 1.17) | 3.4E-01 |
| cg25106875 | <i>PTPRN2</i>   | chr7  | Body    | 1.21 | (0.82; 1.78) | 3.4E-01 |
| cg06747558 | <i>PHACTR1</i>  | chr6  | Body    | 0.78 | (0.46; 1.31) | 3.4E-01 |
| cg07745710 | <i>CACNA1C</i>  | chr12 | Body    | 1.2  | (0.82; 1.76) | 3.4E-01 |
| cg03092783 | <i>PTPRN2</i>   | chr7  | Body    | 0.86 | (0.63; 1.18) | 3.4E-01 |
| cg02900436 | <i>DCUN1D4</i>  | chr4  | Body    | 0.84 | (0.58; 1.21) | 3.4E-01 |
| cg26516710 | <i>ATP6V0C</i>  | chr16 | 3'UTR   | 1.17 | (0.84; 1.64) | 3.4E-01 |
| cg13419681 | <i>CDH13</i>    | chr16 | 5'UTR   | 1.16 | (0.85; 1.6)  | 3.4E-01 |
| cg13419681 | <i>CDH13</i>    | chr16 | Body    | 1.16 | (0.85; 1.6)  | 3.4E-01 |
| cg12551233 | <i>PTPRN2</i>   | chr7  | Body    | 0.86 | (0.62; 1.18) | 3.4E-01 |
| cg03278556 | <i>MBD5</i>     | chr2  | 5'UTR   | 1.25 | (0.78; 2.01) | 3.4E-01 |
| cg23863608 | <i>PEX14</i>    | chr1  | Body    | 1.19 | (0.83; 1.71) | 3.4E-01 |
| cg08758916 | <i>TNRC6B</i>   | chr22 | TSS200  | 1.17 | (0.85; 1.6)  | 3.4E-01 |
| cg23998048 | <i>TENM2</i>    | chr5  | Body    | 1.16 | (0.86; 1.57) | 3.4E-01 |
| cg20855617 | <i>CNTNAP2</i>  | chr7  | Body    | 1.21 | (0.81; 1.81) | 3.4E-01 |
| cg12568086 | <i>CEP350</i>   | chr1  | Body    | 0.83 | (0.56; 1.22) | 3.4E-01 |
| cg09519954 | <i>CREBBP</i>   | chr16 | Body    | 0.83 | (0.57; 1.22) | 3.4E-01 |
| cg11407942 | <i>PEX14</i>    | chr1  | Body    | 1.16 | (0.85; 1.57) | 3.4E-01 |
| cg08688548 | <i>CPEB1</i>    | chr15 | TSS1500 | 1.23 | (0.8; 1.88)  | 3.4E-01 |
| cg01090433 | <i>CDH13</i>    | chr16 | Body    | 1.16 | (0.85; 1.59) | 3.4E-01 |
| cg15488513 | <i>PTPRN2</i>   | chr7  | Body    | 0.86 | (0.63; 1.17) | 3.4E-01 |
| cg18393040 | <i>MEIS2</i>    | chr15 | 5'UTR   | 1.19 | (0.83; 1.73) | 3.5E-01 |
| cg18393040 | <i>MEIS2</i>    | chr15 | TSS1500 | 1.19 | (0.83; 1.73) | 3.5E-01 |
| cg01100465 | <i>PTPRN2</i>   | chr7  | Body    | 0.86 | (0.63; 1.18) | 3.5E-01 |
| cg25148306 | <i>TNRC18</i>   | chr7  | Body    | 0.86 | (0.62; 1.18) | 3.5E-01 |
| cg07466651 | <i>COL5A2</i>   | chr2  | Body    | 1.18 | (0.84; 1.67) | 3.5E-01 |
| cg02479278 | <i>CSMD2</i>    | chr1  | Body    | 0.85 | (0.61; 1.19) | 3.5E-01 |
| cg15577272 | <i>PTPRN2</i>   | chr7  | Body    | 1.2  | (0.82; 1.74) | 3.5E-01 |
| cg08444060 | <i>C11orf67</i> | chr11 | TSS1500 | 0.87 | (0.64; 1.17) | 3.5E-01 |
| cg18571792 | <i>PTPRN2</i>   | chr7  | Body    | 1.16 | (0.85; 1.59) | 3.5E-01 |
| cg22379697 | <i>CHD6</i>     | chr20 | Body    | 1.18 | (0.84; 1.67) | 3.5E-01 |
| cg22681495 | <i>AKAP13</i>   | chr15 | Body    | 0.86 | (0.63; 1.18) | 3.5E-01 |
| cg15104618 | <i>RAP1B</i>    | chr12 | 5'UTR   | 0.85 | (0.6; 1.2)   | 3.5E-01 |
| cg21603960 | <i>PTPRN2</i>   | chr7  | Body    | 1.21 | (0.82; 1.78) | 3.5E-01 |
| cg16534289 | <i>FSTL1</i>    | chr3  | Body    | 0.85 | (0.6; 1.2)   | 3.5E-01 |
| cg17666825 | <i>DCUN1D4</i>  | chr4  | Body    | 1.16 | (0.85; 1.6)  | 3.5E-01 |
| cg17666825 | <i>DCUN1D4</i>  | chr4  | 5'UTR   | 1.16 | (0.85; 1.6)  | 3.5E-01 |
| cg06071058 | <i>BARX1</i>    | chr9  | Body    | 1.23 | (0.8; 1.87)  | 3.5E-01 |
| cg12824246 | <i>CTDSPL</i>   | chr3  | TSS1500 | 0.84 | (0.59; 1.2)  | 3.5E-01 |
| cg22168386 | <i>TNFRSF19</i> | chr13 | Body    | 1.25 | (0.78; 2)    | 3.5E-01 |
| cg20104707 | <i>TNR</i>      | chr1  | 5'UTR   | 0.76 | (0.44; 1.34) | 3.5E-01 |
| cg07769790 | <i>CPEB1</i>    | chr15 | TSS1500 | 1.22 | (0.81; 1.85) | 3.5E-01 |
| cg17445453 | <i>CHFR</i>     | chr12 | Body    | 1.19 | (0.83; 1.7)  | 3.5E-01 |
| cg19415587 | <i>PTPRU</i>    | chr1  | Body    | 1.28 | (0.77; 2.12) | 3.5E-01 |



|            |             |       |         |      |              |         |
|------------|-------------|-------|---------|------|--------------|---------|
| cg24448870 | CHCHD6      | chr3  | Body    | 1.18 | (0.84; 1.66) | 3.5E-01 |
| cg08875357 | RTN4RL1     | chr17 | 3'UTR   | 0.85 | (0.61; 1.19) | 3.5E-01 |
| cg08051625 | CREBBP      | chr16 | Body    | 0.86 | (0.63; 1.18) | 3.5E-01 |
| cg27325293 | PTPRU       | chr1  | Body    | 0.83 | (0.56; 1.23) | 3.5E-01 |
| cg01359748 | PTPRN2      | chr7  | Body    | 0.87 | (0.64; 1.17) | 3.5E-01 |
| cg02223801 | PTPRN2      | chr7  | Body    | 1.24 | (0.79; 1.95) | 3.5E-01 |
| cg18670236 | CHCHD6      | chr3  | Body    | 0.85 | (0.6; 1.2)   | 3.5E-01 |
| cg03184350 | CNTNAP2     | chr7  | Body    | 1.2  | (0.82; 1.77) | 3.5E-01 |
| cg04446724 | PTPRN2      | chr7  | Body    | 1.15 | (0.86; 1.55) | 3.5E-01 |
| cg01351037 | PDE8A       | chr15 | 5'UTR   | 1.17 | (0.84; 1.65) | 3.5E-01 |
| cg01351037 | PDE8A       | chr15 | 1stExon | 1.17 | (0.84; 1.65) | 3.5E-01 |
| cg12652063 | DACH1       | chr13 | TSS200  | 0.85 | (0.61; 1.19) | 3.5E-01 |
| cg26688665 | SCAF8       | chr6  | Body    | 0.8  | (0.5; 1.27)  | 3.5E-01 |
| cg16732884 | ATP6V0C     | chr16 | Body    | 1.2  | (0.82; 1.75) | 3.5E-01 |
| cg24835473 | CHCHD6      | chr3  | Body    | 1.19 | (0.83; 1.69) | 3.5E-01 |
| cg06568361 | RTN4        | chr2  | Body    | 0.85 | (0.6; 1.2)   | 3.5E-01 |
| cg03008692 | PTPRN2      | chr7  | Body    | 0.86 | (0.64; 1.17) | 3.5E-01 |
| cg09328286 | PTPRN2      | chr7  | Body    | 0.84 | (0.57; 1.22) | 3.5E-01 |
| cg10728746 | DDHD2       | chr8  | Body    | 1.17 | (0.84; 1.62) | 3.5E-01 |
| cg10723629 | TXNDC9      | chr2  | TSS1500 | 0.86 | (0.63; 1.18) | 3.5E-01 |
| cg18633471 | PTPRN2      | chr7  | Body    | 1.2  | (0.82; 1.78) | 3.5E-01 |
| cg19383244 | RNU5E-1     | chr5  | Body    | 1.2  | (0.81; 1.78) | 3.5E-01 |
| cg05244331 | CACNA1C-IT2 | chr12 | TSS1500 | 1.28 | (0.76; 2.16) | 3.5E-01 |
| cg11100028 | RTN4        | chr2  | Body    | 1.23 | (0.8; 1.9)   | 3.5E-01 |
| cg11100028 | RTN4        | chr2  | 5'UTR   | 1.23 | (0.8; 1.9)   | 3.5E-01 |
| cg14853194 | TDRP        | chr8  | TSS1500 | 0.83 | (0.55; 1.23) | 3.5E-01 |
| cg14853194 | TDRP        | chr8  | TSS200  | 0.83 | (0.55; 1.23) | 3.5E-01 |
| cg13430960 | CTDSPL      | chr3  | Body    | 1.19 | (0.82; 1.72) | 3.5E-01 |
| cg12126781 | TNFRSF1B    | chr1  | Body    | 1.24 | (0.79; 1.97) | 3.5E-01 |
| cg19686983 | PHACTR1     | chr6  | Body    | 1.3  | (0.75; 2.24) | 3.5E-01 |
| cg21526438 | FBXO32      | chr8  | Body    | 1.18 | (0.84; 1.65) | 3.5E-01 |
| cg25644224 | PTPRN2      | chr7  | Body    | 1.2  | (0.82; 1.76) | 3.5E-01 |
| cg11645735 | TAOK3       | chr12 | TSS200  | 1.17 | (0.84; 1.64) | 3.5E-01 |
| cg17898375 | TNRC18      | chr7  | Body    | 0.84 | (0.58; 1.21) | 3.5E-01 |
| cg11775579 | NRXN1       | chr2  | Body    | 0.87 | (0.64; 1.17) | 3.5E-01 |
| cg21126583 | CNTNAP2     | chr7  | TSS200  | 0.81 | (0.51; 1.27) | 3.5E-01 |
| cg21862363 | AKAP13      | chr15 | Body    | 0.84 | (0.59; 1.21) | 3.5E-01 |
| cg21862363 | AKAP13      | chr15 | TSS200  | 0.84 | (0.59; 1.21) | 3.5E-01 |
| cg05937546 | ATF7IP2     | chr16 | 5'UTR   | 0.84 | (0.58; 1.21) | 3.5E-01 |
| cg05937546 | ATF7IP2     | chr16 | Body    | 0.84 | (0.58; 1.21) | 3.5E-01 |
| cg17204932 | UBE2E2      | chr3  | Body    | 0.76 | (0.43; 1.35) | 3.5E-01 |
| cg08673532 | FBXO31      | chr16 | Body    | 1.17 | (0.84; 1.65) | 3.5E-01 |
| cg16124834 | TNRC6A      | chr16 | Body    | 0.82 | (0.55; 1.24) | 3.5E-01 |
| cg02789218 | ZBTB20      | chr3  | Body    | 1.22 | (0.8; 1.88)  | 3.5E-01 |
| cg02789218 | ZBTB20      | chr3  | 5'UTR   | 1.22 | (0.8; 1.88)  | 3.5E-01 |
| cg02789218 | ZBTB20      | chr3  | TSS200  | 1.22 | (0.8; 1.88)  | 3.5E-01 |
| cg21294655 | ARID1A      | chr1  | TSS1500 | 0.84 | (0.58; 1.22) | 3.5E-01 |
| cg09586034 | TNR         | chr1  | Body    | 0.86 | (0.62; 1.19) | 3.5E-01 |
| cg07930746 | CACNA1C     | chr12 | Body    | 1.18 | (0.83; 1.68) | 3.5E-01 |
| cg07874329 | SMARCD3     | chr7  | Body    | 0.84 | (0.58; 1.22) | 3.5E-01 |
| cg00706191 | CDH11       | chr16 | Body    | 0.81 | (0.52; 1.26) | 3.5E-01 |
| cg20697251 | PTPRS       | chr19 | 5'UTR   | 0.82 | (0.55; 1.24) | 3.5E-01 |
| cg07675811 | TNRC18      | chr7  | Body    | 0.87 | (0.64; 1.17) | 3.5E-01 |
| cg04029645 | CDH13       | chr16 | Body    | 0.85 | (0.6; 1.2)   | 3.5E-01 |
| cg13169515 | TNFRSF10C   | chr8  | TSS1500 | 1.23 | (0.8; 1.89)  | 3.5E-01 |
| cg08102838 | PTPRN2      | chr7  | Body    | 1.16 | (0.85; 1.59) | 3.5E-01 |
| cg03339618 | WWOX        | chr16 | Body    | 0.86 | (0.63; 1.18) | 3.5E-01 |
| cg22575717 | NOL4L       | chr20 | Body    | 1.64 | (0.57; 4.7)  | 3.5E-01 |
| cg15975890 | CTNND2      | chr5  | Body    | 0.87 | (0.64; 1.18) | 3.5E-01 |
| cg00029031 | TNR         | chr1  | 5'UTR   | 0.8  | (0.5; 1.28)  | 3.5E-01 |
| cg13858310 | ATP8A1      | chr4  | Body    | 0.84 | (0.57; 1.22) | 3.5E-01 |



|            |           |       |         |      |              |         |
|------------|-----------|-------|---------|------|--------------|---------|
| cg10478867 | SMARCD3   | chr7  | Body    | 0.84 | (0.58; 1.21) | 3.5E-01 |
| cg09112723 | SGIP1     | chr1  | Body    | 0.83 | (0.55; 1.24) | 3.5E-01 |
| cg21340024 | SUGCT     | chr7  | Body    | 0.82 | (0.53; 1.26) | 3.5E-01 |
| cg00164538 | CUX2      | chr12 | Body    | 1.21 | (0.8; 1.84)  | 3.5E-01 |
| cg24275501 | CACNA1C   | chr12 | Body    | 0.86 | (0.61; 1.19) | 3.6E-01 |
| cg02472401 | RTN4RL1   | chr17 | Body    | 1.19 | (0.82; 1.74) | 3.6E-01 |
| cg02279913 | MTCL1     | chr18 | 3'UTR   | 1.23 | (0.8; 1.89)  | 3.6E-01 |
| cg18881200 | CHCHD6    | chr3  | Body    | 1.15 | (0.85; 1.57) | 3.6E-01 |
| cg03664994 | RTN4      | chr2  | Body    | 0.67 | (0.29; 1.56) | 3.6E-01 |
| cg12393795 | CACNA1C   | chr12 | Body    | 0.82 | (0.54; 1.25) | 3.6E-01 |
| cg26402356 | WVOX      | chr16 | Body    | 0.82 | (0.55; 1.24) | 3.6E-01 |
| cg16701767 | ARID1A    | chr1  | Body    | 1.15 | (0.85; 1.57) | 3.6E-01 |
| cg20899146 | RTN4RL1   | chr17 | Body    | 1.17 | (0.84; 1.62) | 3.6E-01 |
| cg26353611 | DNAI2     | chr17 | Body    | 0.85 | (0.6; 1.2)   | 3.6E-01 |
| cg16866892 | CACNA1C   | chr12 | Body    | 1.22 | (0.8; 1.86)  | 3.6E-01 |
| cg13915179 | PTPRN2    | chr7  | Body    | 1.16 | (0.84; 1.6)  | 3.6E-01 |
| cg11815914 | TNFRSF11A | chr18 | TSS200  | 0.85 | (0.61; 1.2)  | 3.6E-01 |
| cg16727193 | CHCHD6    | chr3  | Body    | 1.42 | (0.68; 2.97) | 3.6E-01 |
| cg09845489 | PTPRN2    | chr7  | Body    | 1.17 | (0.84; 1.63) | 3.6E-01 |
| cg18522131 | CDH13     | chr16 | 5'UTR   | 1.16 | (0.84; 1.61) | 3.6E-01 |
| cg18522131 | CDH13     | chr16 | Body    | 1.16 | (0.84; 1.61) | 3.6E-01 |
| cg25934673 | PTPRN2    | chr7  | Body    | 1.18 | (0.83; 1.67) | 3.6E-01 |
| cg03200105 | TNFRSF11B | chr8  | TSS200  | 0.86 | (0.62; 1.19) | 3.6E-01 |
| cg13371705 | CACNA1C   | chr12 | Body    | 1.38 | (0.7; 2.72)  | 3.6E-01 |
| cg02785870 | TNRC6A    | chr16 | Body    | 0.86 | (0.63; 1.18) | 3.6E-01 |
| cg05890693 | TNRC6C    | chr17 | Body    | 0.85 | (0.6; 1.2)   | 3.6E-01 |
| cg05280478 | RECQL5    | chr17 | Body    | 0.84 | (0.59; 1.21) | 3.6E-01 |
| cg22786826 | ATP6V0C   | chr16 | Body    | 1.16 | (0.84; 1.61) | 3.6E-01 |
| cg23074601 | PTPRN2    | chr7  | Body    | 1.17 | (0.84; 1.63) | 3.6E-01 |
| cg08106706 | ELAVL4    | chr1  | TSS200  | 1.19 | (0.83; 1.7)  | 3.6E-01 |
| cg08106706 | ELAVL4    | chr1  | Body    | 1.19 | (0.83; 1.7)  | 3.6E-01 |
| cg26472973 | PTPRN2    | chr7  | Body    | 1.17 | (0.83; 1.65) | 3.6E-01 |
| cg00164641 | WVOX      | chr16 | Body    | 1.16 | (0.85; 1.57) | 3.6E-01 |
| cg03229959 | DDHD2     | chr8  | 5'UTR   | 1.15 | (0.85; 1.57) | 3.6E-01 |
| cg03229959 | DDHD2     | chr8  | 1stExon | 1.15 | (0.85; 1.57) | 3.6E-01 |
| cg09351848 | NRXN1     | chr2  | Body    | 1.2  | (0.81; 1.77) | 3.6E-01 |
| cg05833106 | CTNND2    | chr5  | Body    | 0.85 | (0.6; 1.2)   | 3.6E-01 |
| cg05833106 | CTNND2    | chr5  | 5'UTR   | 0.85 | (0.6; 1.2)   | 3.6E-01 |
| cg15098557 | CACNA1C   | chr12 | Body    | 1.22 | (0.8; 1.88)  | 3.6E-01 |
| cg08579902 | PTPRS     | chr19 | Body    | 1.17 | (0.84; 1.63) | 3.6E-01 |
| cg12975061 | WVOX      | chr16 | Body    | 0.85 | (0.59; 1.21) | 3.6E-01 |
| cg23914278 | SGIP1     | chr1  | Body    | 0.86 | (0.62; 1.19) | 3.6E-01 |
| cg02721935 | RNU5E-1   | chr5  | Body    | 0.85 | (0.61; 1.2)  | 3.6E-01 |
| cg04550543 | CACNA1C   | chr12 | Body    | 1.2  | (0.81; 1.79) | 3.6E-01 |
| cg05579077 | NRXN1     | chr2  | 5'UTR   | 1.27 | (0.77; 2.09) | 3.6E-01 |
| cg05579077 | NRXN1     | chr2  | 1stExon | 1.27 | (0.77; 2.09) | 3.6E-01 |
| cg05579077 | NRXN1     | chr2  | Body    | 1.27 | (0.77; 2.09) | 3.6E-01 |
| cg07754747 | CDH13     | chr16 | Body    | 1.17 | (0.84; 1.62) | 3.6E-01 |
| cg14661464 | TXNDC9    | chr2  | TSS1500 | 1.18 | (0.83; 1.67) | 3.6E-01 |
| cg17945626 | FBXO32    | chr8  | TSS1500 | 0.84 | (0.58; 1.22) | 3.6E-01 |
| cg15469966 | CHFR      | chr12 | 3'UTR   | 0.85 | (0.61; 1.2)  | 3.6E-01 |
| cg04992665 | FBXO32    | chr8  | Body    | 0.85 | (0.59; 1.21) | 3.6E-01 |
| cg15061825 | PTPRN2    | chr7  | Body    | 0.87 | (0.65; 1.17) | 3.6E-01 |
| cg27392792 | PTPRN2    | chr7  | TSS1500 | 0.83 | (0.56; 1.24) | 3.6E-01 |
| cg12795560 | TNFRSF11A | chr18 | Body    | 0.73 | (0.37; 1.44) | 3.6E-01 |
| cg24647031 | PTPRN2    | chr7  | Body    | 0.83 | (0.56; 1.23) | 3.6E-01 |
| cg08431749 | PTPRN2    | chr7  | Body    | 0.87 | (0.65; 1.17) | 3.6E-01 |
| cg01803486 | PTPRN2    | chr7  | Body    | 0.87 | (0.64; 1.17) | 3.6E-01 |
| cg27639268 | CUX2      | chr12 | Body    | 1.16 | (0.84; 1.62) | 3.6E-01 |
| cg03895695 | MEIS2     | chr15 | Body    | 0.86 | (0.61; 1.2)  | 3.6E-01 |
| cg08904151 | PTPRN2    | chr7  | Body    | 1.24 | (0.78; 1.96) | 3.6E-01 |



|            |                  |       |         |      |              |         |
|------------|------------------|-------|---------|------|--------------|---------|
| cg14909060 | <i>ERI3</i>      | chr1  | Body    | 0.86 | (0.61; 1.2)  | 3.6E-01 |
| cg04829746 | <i>ZFP91</i>     | chr11 | TSS200  | 1.15 | (0.85; 1.54) | 3.6E-01 |
| cg12033124 | <i>TAOK3</i>     | chr12 | 5'UTR   | 1.28 | (0.75; 2.16) | 3.6E-01 |
| cg00596819 | <i>PTPRN2</i>    | chr7  | Body    | 0.85 | (0.59; 1.21) | 3.6E-01 |
| cg26922019 | <i>ZBTB20</i>    | chr3  | TSS1500 | 1.16 | (0.84; 1.61) | 3.6E-01 |
| cg26922019 | <i>ZBTB20</i>    | chr3  | 5'UTR   | 1.16 | (0.84; 1.61) | 3.6E-01 |
| cg09955450 | <i>CTNND2</i>    | chr5  | Body    | 0.85 | (0.61; 1.2)  | 3.6E-01 |
| cg09955450 | <i>CTNND2</i>    | chr5  | TSS200  | 0.85 | (0.61; 1.2)  | 3.6E-01 |
| cg09955450 | <i>CTNND2</i>    | chr5  | 5'UTR   | 0.85 | (0.61; 1.2)  | 3.6E-01 |
| cg09539543 | <i>PTPRN2</i>    | chr7  | Body    | 1.17 | (0.83; 1.66) | 3.6E-01 |
| cg05509128 | <i>ZNF704</i>    | chr8  | Body    | 1.19 | (0.82; 1.71) | 3.6E-01 |
| cg04607379 | <i>PEX14</i>     | chr1  | Body    | 0.83 | (0.56; 1.23) | 3.6E-01 |
| cg16654432 | <i>ALCAM</i>     | chr3  | Body    | 0.86 | (0.62; 1.19) | 3.6E-01 |
| cg10231192 | <i>TAOK3</i>     | chr12 | 5'UTR   | 1.27 | (0.76; 2.12) | 3.6E-01 |
| cg21640060 | <i>TNR</i>       | chr1  | 5'UTR   | 0.86 | (0.62; 1.19) | 3.6E-01 |
| cg11754652 | <i>PHACTR1</i>   | chr6  | Body    | 1.16 | (0.84; 1.6)  | 3.6E-01 |
| cg19509988 | <i>PTPRN2</i>    | chr7  | Body    | 0.85 | (0.6; 1.2)   | 3.6E-01 |
| cg21767434 | <i>FBXO31</i>    | chr16 | 5'UTR   | 1.16 | (0.85; 1.58) | 3.6E-01 |
| cg06912413 | <i>PTPRN2</i>    | chr7  | Body    | 0.86 | (0.63; 1.18) | 3.6E-01 |
| cg14644166 | <i>ALCAM</i>     | chr3  | TSS200  | 0.87 | (0.64; 1.18) | 3.6E-01 |
| cg18409858 | <i>PEX14</i>     | chr1  | Body    | 1.21 | (0.8; 1.83)  | 3.6E-01 |
| cg03846111 | <i>ATF7IP</i>    | chr12 | 5'UTR   | 0.85 | (0.59; 1.21) | 3.6E-01 |
| cg26229648 | <i>CNTF</i>      | chr11 | Body    | 0.87 | (0.65; 1.17) | 3.6E-01 |
| cg20031197 | <i>ERI3</i>      | chr1  | Body    | 1.24 | (0.78; 1.99) | 3.6E-01 |
| cg27548450 | <i>FBXO31</i>    | chr16 | Body    | 1.18 | (0.83; 1.67) | 3.6E-01 |
| cg08114011 | <i>CUX2</i>      | chr12 | Body    | 1.25 | (0.77; 2.03) | 3.6E-01 |
| cg00039016 | <i>FBXO31</i>    | chr16 | Body    | 0.83 | (0.56; 1.23) | 3.6E-01 |
| cg16569373 | <i>CREBBP</i>    | chr16 | Body    | 1.27 | (0.76; 2.14) | 3.6E-01 |
| cg20806436 | <i>UBE2E2</i>    | chr3  | Body    | 0.8  | (0.5; 1.29)  | 3.6E-01 |
| cg23791941 | <i>AKAP13</i>    | chr15 | Body    | 0.85 | (0.61; 1.2)  | 3.6E-01 |
| cg01439112 | <i>CTDSPL</i>    | chr3  | Body    | 1.36 | (0.7; 2.63)  | 3.6E-01 |
| cg20560185 | <i>FBXO11</i>    | chr2  | 3'UTR   | 0.84 | (0.58; 1.22) | 3.6E-01 |
| cg20560185 | <i>FBXO11</i>    | chr2  | Body    | 0.84 | (0.58; 1.22) | 3.6E-01 |
| cg04277128 | <i>RNU5E-1</i>   | chr5  | Body    | 0.78 | (0.46; 1.33) | 3.6E-01 |
| cg01794596 | <i>AKAP3</i>     | chr12 | 5'UTR   | 0.84 | (0.58; 1.22) | 3.6E-01 |
| cg11967765 | <i>GNA12</i>     | chr7  | Body    | 0.7  | (0.32; 1.52) | 3.6E-01 |
| cg22677556 | <i>TNFRSF1B</i>  | chr1  | Body    | 1.22 | (0.8; 1.86)  | 3.6E-01 |
| cg04348816 | <i>TNRC18</i>    | chr7  | 5'UTR   | 1.16 | (0.84; 1.6)  | 3.6E-01 |
| cg24309040 | <i>CUX2</i>      | chr12 | Body    | 0.85 | (0.6; 1.21)  | 3.7E-01 |
| cg24013909 | <i>PTPRU</i>     | chr1  | Body    | 0.85 | (0.61; 1.2)  | 3.7E-01 |
| cg18735405 | <i>TENM2</i>     | chr5  | Body    | 1.24 | (0.78; 1.99) | 3.7E-01 |
| cg09981964 | <i>CNTNAP2</i>   | chr7  | Body    | 0.83 | (0.55; 1.25) | 3.7E-01 |
| cg04336433 | <i>CREBBP</i>    | chr16 | Body    | 0.84 | (0.57; 1.23) | 3.7E-01 |
| cg00113321 | <i>PTPRN2</i>    | chr7  | Body    | 0.87 | (0.65; 1.17) | 3.7E-01 |
| cg13106484 | <i>PTPRN2</i>    | chr7  | Body    | 0.86 | (0.61; 1.2)  | 3.7E-01 |
| cg08430068 | <i>FBXO34</i>    | chr14 | 1stExon | 0.85 | (0.6; 1.21)  | 3.7E-01 |
| cg08430068 | <i>FBXO34</i>    | chr14 | TSS1500 | 0.85 | (0.6; 1.21)  | 3.7E-01 |
| cg08430068 | <i>FBXO34</i>    | chr14 | 5'UTR   | 0.85 | (0.6; 1.21)  | 3.7E-01 |
| cg09505513 | <i>TNRC18</i>    | chr7  | Body    | 0.84 | (0.58; 1.22) | 3.7E-01 |
| cg20459744 | <i>FBXO33</i>    | chr14 | Body    | 0.85 | (0.61; 1.2)  | 3.7E-01 |
| cg26170014 | <i>PTPRN2</i>    | chr7  | Body    | 1.14 | (0.85; 1.53) | 3.7E-01 |
| cg24527252 | <i>AKAP13</i>    | chr15 | 5'UTR   | 0.87 | (0.63; 1.18) | 3.7E-01 |
| cg00788521 | <i>CACNA1C</i>   | chr12 | Body    | 0.86 | (0.62; 1.2)  | 3.7E-01 |
| cg18106550 | <i>DDHD2</i>     | chr8  | ExonBnd | 1.19 | (0.82; 1.73) | 3.7E-01 |
| cg18106550 | <i>DDHD2</i>     | chr8  | Body    | 1.19 | (0.82; 1.73) | 3.7E-01 |
| cg23051664 | <i>TNFRSF10D</i> | chr8  | Body    | 0.87 | (0.64; 1.18) | 3.7E-01 |
| cg06288684 | <i>BARX1</i>     | chr9  | TSS1500 | 0.87 | (0.64; 1.18) | 3.7E-01 |
| cg27201297 | <i>CTDSPL</i>    | chr3  | TSS1500 | 1.17 | (0.83; 1.66) | 3.7E-01 |
| cg17816173 | <i>PTPRN2</i>    | chr7  | Body    | 0.86 | (0.62; 1.19) | 3.7E-01 |
| cg14698665 | <i>CTNND2</i>    | chr5  | Body    | 0.84 | (0.58; 1.22) | 3.7E-01 |
| cg19046175 | <i>TENM2</i>     | chr5  | Body    | 0.7  | (0.33; 1.51) | 3.7E-01 |



|            |                  |       |         |      |              |         |
|------------|------------------|-------|---------|------|--------------|---------|
| cg27125091 | <i>PTPRN2</i>    | chr7  | Body    | 1.16 | (0.84; 1.6)  | 3.7E-01 |
| cg24689264 | <i>CPEB1</i>     | chr15 | Body    | 0.84 | (0.59; 1.22) | 3.7E-01 |
| cg05708255 | <i>SUSD4</i>     | chr1  | Body    | 1.16 | (0.84; 1.61) | 3.7E-01 |
| cg01078871 | <i>FBXO33</i>    | chr14 | 5'UTR   | 0.82 | (0.53; 1.27) | 3.7E-01 |
| cg01078871 | <i>FBXO33</i>    | chr14 | 1stExon | 0.82 | (0.53; 1.27) | 3.7E-01 |
| cg00470794 | <i>CHFR</i>      | chr12 | TSS1500 | 0.87 | (0.64; 1.18) | 3.7E-01 |
| cg15337646 | <i>CHFR</i>      | chr12 | TSS1500 | 0.85 | (0.59; 1.21) | 3.7E-01 |
| cg13447454 | <i>POU2F1</i>    | chr1  | 5'UTR   | 1.17 | (0.83; 1.63) | 3.7E-01 |
| cg17470549 | <i>CDH13</i>     | chr16 | 5'UTR   | 0.86 | (0.62; 1.19) | 3.7E-01 |
| cg17470549 | <i>CDH13</i>     | chr16 | Body    | 0.86 | (0.62; 1.19) | 3.7E-01 |
| cg01699430 | <i>CUX2</i>      | chr12 | Body    | 0.87 | (0.64; 1.18) | 3.7E-01 |
| cg04536893 | <i>CDH11</i>     | chr16 | 5'UTR   | 0.81 | (0.5; 1.29)  | 3.7E-01 |
| cg07473853 | <i>FBXO32</i>    | chr8  | Body    | 1.31 | (0.73; 2.38) | 3.7E-01 |
| cg05064223 | <i>PTPRN2</i>    | chr7  | Body    | 1.16 | (0.84; 1.58) | 3.7E-01 |
| cg14660076 | <i>TNFRSF1A</i>  | chr12 | Body    | 0.87 | (0.64; 1.18) | 3.7E-01 |
| cg01579531 | <i>WAC</i>       | chr10 | Body    | 0.81 | (0.52; 1.28) | 3.7E-01 |
| cg17525385 | <i>TENM2</i>     | chr5  | Body    | 1.19 | (0.82; 1.73) | 3.7E-01 |
| cg07766942 | <i>UBE2E2</i>    | chr3  | Body    | 1.15 | (0.85; 1.57) | 3.7E-01 |
| cg13534715 | <i>CACNA1C</i>   | chr12 | Body    | 1.17 | (0.83; 1.63) | 3.7E-01 |
| cg09194449 | <i>PTPRN2</i>    | chr7  | Body    | 1.15 | (0.85; 1.57) | 3.7E-01 |
| cg20012879 | <i>CDH13</i>     | chr16 | 5'UTR   | 0.85 | (0.6; 1.21)  | 3.7E-01 |
| cg20012879 | <i>CDH13</i>     | chr16 | Body    | 0.85 | (0.6; 1.21)  | 3.7E-01 |
| cg00513313 | <i>PTPRN2</i>    | chr7  | Body    | 1.14 | (0.85; 1.53) | 3.7E-01 |
| cg27606822 | <i>CTDSP2</i>    | chr12 | Body    | 1.12 | (0.87; 1.43) | 3.7E-01 |
| cg10816863 | <i>EIF2S1</i>    | chr14 | 3'UTR   | 0.87 | (0.63; 1.18) | 3.7E-01 |
| cg16080125 | <i>GNA12</i>     | chr7  | Body    | 0.75 | (0.4; 1.4)   | 3.7E-01 |
| cg15160746 | <i>CACNA1C</i>   | chr12 | Body    | 1.14 | (0.86; 1.52) | 3.7E-01 |
| cg10854029 | <i>TNFRSF10B</i> | chr8  | Body    | 0.88 | (0.65; 1.17) | 3.7E-01 |
| cg10854029 | <i>TNFRSF10B</i> | chr8  | 5'UTR   | 0.88 | (0.65; 1.17) | 3.7E-01 |
| cg10854029 | <i>TNFRSF10B</i> | chr8  | 1stExon | 0.88 | (0.65; 1.17) | 3.7E-01 |
| cg08557686 | <i>RTN4R</i>     | chr22 | TSS1500 | 0.85 | (0.6; 1.21)  | 3.7E-01 |
| cg19637634 | <i>MEIS2</i>     | chr15 | Body    | 0.84 | (0.57; 1.23) | 3.7E-01 |
| cg00699321 | <i>PTPRN2</i>    | chr7  | Body    | 0.87 | (0.64; 1.18) | 3.7E-01 |
| cg19880462 | <i>SLC16A9</i>   | chr10 | 5'UTR   | 0.87 | (0.64; 1.18) | 3.7E-01 |
| cg08605038 | <i>ARID1A</i>    | chr1  | Body    | 1.2  | (0.8; 1.81)  | 3.7E-01 |
| cg04316213 | <i>RTN4RL1</i>   | chr17 | Body    | 0.87 | (0.65; 1.18) | 3.7E-01 |
| cg20264322 | <i>TAOK3</i>     | chr12 | 5'UTR   | 1.19 | (0.82; 1.73) | 3.7E-01 |
| cg07031083 | <i>FBXO31</i>    | chr16 | Body    | 1.16 | (0.83; 1.63) | 3.7E-01 |
| cg17042000 | <i>PTPRN2</i>    | chr7  | Body    | 1.15 | (0.85; 1.54) | 3.7E-01 |
| cg05347872 | <i>PTPRN2</i>    | chr7  | Body    | 0.85 | (0.59; 1.22) | 3.7E-01 |
| cg10331779 | <i>CTNND2</i>    | chr5  | TSS1500 | 0.81 | (0.51; 1.28) | 3.7E-01 |
| cg18196333 | <i>PTPRN2</i>    | chr7  | Body    | 1.16 | (0.84; 1.58) | 3.7E-01 |
| cg13826570 | <i>POU2F1</i>    | chr1  | Body    | 0.84 | (0.57; 1.23) | 3.7E-01 |
| cg01272816 | <i>PTPRN2</i>    | chr7  | Body    | 1.15 | (0.85; 1.55) | 3.7E-01 |
| cg12295431 | <i>UBE2E2</i>    | chr3  | Body    | 1.22 | (0.78; 1.91) | 3.7E-01 |
| cg22321985 | <i>CREBBP</i>    | chr16 | 3'UTR   | 0.86 | (0.63; 1.19) | 3.7E-01 |
| cg15842276 | <i>MTNR1B</i>    | chr11 | TSS200  | 1.19 | (0.81; 1.76) | 3.7E-01 |
| cg10889319 | <i>SUGCT</i>     | chr7  | Body    | 0.84 | (0.57; 1.24) | 3.7E-01 |
| cg07301944 | <i>CDH13</i>     | chr16 | TSS200  | 0.84 | (0.57; 1.24) | 3.7E-01 |
| cg00445142 | <i>FSTL1</i>     | chr3  | Body    | 0.85 | (0.6; 1.21)  | 3.7E-01 |
| cg15548246 | <i>PHACTR1</i>   | chr6  | Body    | 1.17 | (0.83; 1.65) | 3.7E-01 |
| cg18165289 | <i>TENM2</i>     | chr5  | Body    | 1.16 | (0.83; 1.62) | 3.7E-01 |
| cg21197216 | <i>CSMD2</i>     | chr1  | TSS1500 | 0.84 | (0.57; 1.24) | 3.7E-01 |
| cg11702403 | <i>TNFRSF10B</i> | chr8  | Body    | 1.25 | (0.76; 2.06) | 3.7E-01 |
| cg09040942 | <i>PTPRN2</i>    | chr7  | Body    | 1.18 | (0.82; 1.69) | 3.7E-01 |
| cg22750243 | <i>SMARCD3</i>   | chr7  | TSS200  | 0.86 | (0.61; 1.2)  | 3.7E-01 |
| cg22750243 | <i>SMARCD3</i>   | chr7  | TSS1500 | 0.86 | (0.61; 1.2)  | 3.7E-01 |
| cg13678973 | <i>ELAVL4</i>    | chr1  | Body    | 0.84 | (0.57; 1.24) | 3.7E-01 |
| cg13541101 | <i>NOL4L</i>     | chr20 | Body    | 1.18 | (0.82; 1.69) | 3.7E-01 |
| cg19857361 | <i>HMGB4</i>     | chr1  | Body    | 0.88 | (0.65; 1.17) | 3.7E-01 |
| cg19857361 | <i>HMGB4</i>     | chr1  | 5'UTR   | 0.88 | (0.65; 1.17) | 3.7E-01 |



|            |              |       |         |      |              |         |
|------------|--------------|-------|---------|------|--------------|---------|
| cg19857361 | CSMD2        | chr1  | Body    | 0.88 | (0.65; 1.17) | 3.7E-01 |
| cg08287689 | WVOX         | chr16 | Body    | 1.2  | (0.8; 1.79)  | 3.7E-01 |
| cg07015393 | SMARCD3      | chr7  | TSS1500 | 0.79 | (0.46; 1.34) | 3.7E-01 |
| cg07015393 | SMARCD3      | chr7  | Body    | 0.79 | (0.46; 1.34) | 3.7E-01 |
| cg18372367 | TNFRSF1A     | chr12 | TSS200  | 1.2  | (0.81; 1.77) | 3.7E-01 |
| cg18059383 | RTN4RL1      | chr17 | 3'UTR   | 0.83 | (0.55; 1.25) | 3.7E-01 |
| cg10210928 | GNA12        | chr7  | Body    | 0.85 | (0.59; 1.22) | 3.7E-01 |
| cg11572845 | SCAF8        | chr6  | Body    | 1.23 | (0.78; 1.96) | 3.7E-01 |
| cg02911489 | GNA12        | chr7  | Body    | 0.86 | (0.61; 1.21) | 3.7E-01 |
| cg19524723 | TNFRSF11A    | chr18 | Body    | 0.86 | (0.62; 1.19) | 3.7E-01 |
| cg15034683 | PTPRN2       | chr7  | Body    | 0.87 | (0.63; 1.19) | 3.7E-01 |
| cg14803733 | LOC101929698 | chr20 | Body    | 0.83 | (0.54; 1.26) | 3.7E-01 |
| cg14803733 | NOL4L        | chr20 | Body    | 0.83 | (0.54; 1.26) | 3.7E-01 |
| cg17596493 | TNFRSF19     | chr13 | TSS1500 | 0.82 | (0.54; 1.26) | 3.7E-01 |
| cg12096486 | SUGCT        | chr7  | Body    | 0.8  | (0.49; 1.31) | 3.7E-01 |
| cg15952457 | CDH13        | chr16 | 5'UTR   | 1.17 | (0.82; 1.67) | 3.8E-01 |
| cg15952457 | CDH13        | chr16 | Body    | 1.17 | (0.82; 1.67) | 3.8E-01 |
| cg25207456 | RTN4RL1      | chr17 | Body    | 0.86 | (0.62; 1.2)  | 3.8E-01 |
| cg13738611 | RAP1B        | chr12 | TSS200  | 0.86 | (0.62; 1.2)  | 3.8E-01 |
| cg13115534 | TNR          | chr1  | 5'UTR   | 0.85 | (0.59; 1.22) | 3.8E-01 |
| cg01247454 | COL5A2       | chr2  | Body    | 0.85 | (0.6; 1.21)  | 3.8E-01 |
| cg17304276 | CUX2         | chr12 | Body    | 0.84 | (0.57; 1.23) | 3.8E-01 |
| cg06956613 | SMARCD3      | chr7  | TSS200  | 0.87 | (0.63; 1.19) | 3.8E-01 |
| cg06956613 | SMARCD3      | chr7  | Body    | 0.87 | (0.63; 1.19) | 3.8E-01 |
| cg10871214 | MBD5         | chr2  | 5'UTR   | 1.17 | (0.83; 1.64) | 3.8E-01 |
| cg23845211 | CHFR         | chr12 | Body    | 1.15 | (0.84; 1.57) | 3.8E-01 |
| cg20502694 | DNAI2        | chr17 | Body    | 1.16 | (0.84; 1.6)  | 3.8E-01 |
| cg16597537 | RTN4R        | chr22 | Body    | 1.17 | (0.82; 1.66) | 3.8E-01 |
| cg21179654 | ZBTB20       | chr3  | 3'UTR   | 0.78 | (0.45; 1.35) | 3.8E-01 |
| cg01338762 | FBXO11       | chr2  | Body    | 0.83 | (0.54; 1.26) | 3.8E-01 |
| cg01554257 | TNRC18       | chr7  | Body    | 0.85 | (0.59; 1.22) | 3.8E-01 |
| cg10310846 | WAC          | chr10 | TSS200  | 0.86 | (0.62; 1.2)  | 3.8E-01 |
| cg10310846 | WAC          | chr10 | TSS1500 | 0.86 | (0.62; 1.2)  | 3.8E-01 |
| cg05039004 | PTPRU        | chr1  | Body    | 1.18 | (0.82; 1.69) | 3.8E-01 |
| cg19619387 | RTN4RL1      | chr17 | Body    | 1.17 | (0.83; 1.65) | 3.8E-01 |
| cg06273051 | CDH13        | chr16 | Body    | 1.15 | (0.85; 1.55) | 3.8E-01 |
| cg23162598 | PTPRN2       | chr7  | Body    | 0.87 | (0.64; 1.18) | 3.8E-01 |
| cg17658976 | PTPRN2       | chr7  | Body    | 0.86 | (0.63; 1.19) | 3.8E-01 |
| cg04875212 | EIF2S1       | chr14 | 5'UTR   | 0.83 | (0.55; 1.26) | 3.8E-01 |
| cg12309867 | UBE2E2       | chr3  | Body    | 0.84 | (0.56; 1.25) | 3.8E-01 |
| cg04502704 | DDHD2        | chr8  | Body    | 0.86 | (0.62; 1.2)  | 3.8E-01 |
| cg09665332 | SGIP1        | chr1  | Body    | 0.86 | (0.61; 1.21) | 3.8E-01 |
| cg04297922 | MEX3A        | chr1  | 3'UTR   | 0.86 | (0.61; 1.2)  | 3.8E-01 |
| cg00334362 | PHACTR1      | chr6  | Body    | 0.68 | (0.29; 1.6)  | 3.8E-01 |
| cg20673767 | PTPRN2       | chr7  | Body    | 1.16 | (0.83; 1.63) | 3.8E-01 |
| cg06901094 | CSMD2        | chr1  | Body    | 0.85 | (0.6; 1.22)  | 3.8E-01 |
| cg24215175 | TNRC6B       | chr22 | Body    | 0.81 | (0.51; 1.29) | 3.8E-01 |
| cg19704410 | CTDSP2       | chr12 | Body    | 1.21 | (0.79; 1.84) | 3.8E-01 |
| cg06803897 | FBXO38       | chr5  | TSS1500 | 0.87 | (0.64; 1.19) | 3.8E-01 |
| cg05820110 | RTN4RL1      | chr17 | Body    | 1.17 | (0.82; 1.68) | 3.8E-01 |
| cg04775824 | PTPRN2       | chr7  | Body    | 0.85 | (0.59; 1.22) | 3.8E-01 |
| cg12035530 | CACNA1C      | chr12 | Body    | 1.19 | (0.81; 1.74) | 3.8E-01 |
| cg12144852 | PTPRN2       | chr7  | Body    | 1.15 | (0.84; 1.58) | 3.8E-01 |
| cg07768554 | CSMD2        | chr1  | Body    | 0.87 | (0.63; 1.19) | 3.8E-01 |
| cg26159990 | ERI3         | chr1  | Body    | 1.16 | (0.83; 1.62) | 3.8E-01 |
| cg22053929 | MEX3A        | chr1  | TSS1500 | 0.88 | (0.65; 1.18) | 3.8E-01 |
| cg07689260 | PTPRN2       | chr7  | Body    | 1.13 | (0.86; 1.5)  | 3.8E-01 |
| cg01256026 | WVOX         | chr16 | Body    | 1.16 | (0.83; 1.61) | 3.8E-01 |
| cg00283887 | PTPRN2       | chr7  | Body    | 1.16 | (0.83; 1.61) | 3.8E-01 |
| cg17486066 | HMGB4        | chr1  | Body    | 0.84 | (0.56; 1.25) | 3.8E-01 |
| cg17486066 | CSMD2        | chr1  | Body    | 0.84 | (0.56; 1.25) | 3.8E-01 |



|            |           |       |         |      |              |         |
|------------|-----------|-------|---------|------|--------------|---------|
| cg07226612 | CTNND2    | chr5  | Body    | 1.16 | (0.83; 1.62) | 3.8E-01 |
| cg12406992 | MEX3A     | chr1  | Body    | 0.84 | (0.58; 1.23) | 3.8E-01 |
| cg06278181 | ARID1A    | chr1  | Body    | 0.84 | (0.57; 1.24) | 3.8E-01 |
| cg12197142 | RECQL5    | chr17 | Body    | 0.84 | (0.56; 1.25) | 3.8E-01 |
| cg14669511 | RTN4RL1   | chr17 | Body    | 1.16 | (0.83; 1.62) | 3.8E-01 |
| cg19806031 | MEIS2     | chr15 | Body    | 0.85 | (0.58; 1.23) | 3.8E-01 |
| cg23248689 | AKAP13    | chr15 | Body    | 0.85 | (0.59; 1.23) | 3.8E-01 |
| cg26064307 | TENM2     | chr5  | Body    | 0.86 | (0.6; 1.21)  | 3.8E-01 |
| cg21945842 | ALCAM     | chr3  | TSS1500 | 1.17 | (0.82; 1.66) | 3.8E-01 |
| cg18929894 | ATF7IP    | chr12 | 5'UTR   | 1.21 | (0.79; 1.87) | 3.8E-01 |
| cg24191641 | FBXO36    | chr2  | Body    | 1.15 | (0.84; 1.59) | 3.8E-01 |
| cg00847544 | PTPRN2    | chr7  | Body    | 0.86 | (0.62; 1.2)  | 3.8E-01 |
| cg17279410 | TNFRSF11A | chr18 | Body    | 0.86 | (0.62; 1.2)  | 3.8E-01 |
| cg03097785 | UBE2E2    | chr3  | Body    | 0.83 | (0.54; 1.26) | 3.8E-01 |
| cg04939051 | ATP6V0C   | chr16 | Body    | 0.86 | (0.62; 1.2)  | 3.8E-01 |
| cg01039154 | TENM2     | chr5  | Body    | 0.86 | (0.62; 1.2)  | 3.8E-01 |
| cg25793578 | PTPRN2    | chr7  | Body    | 0.87 | (0.65; 1.18) | 3.8E-01 |
| cg06976434 | COL5A2    | chr2  | Body    | 0.86 | (0.62; 1.2)  | 3.8E-01 |
| cg10554264 | PTPRN2    | chr7  | Body    | 0.87 | (0.64; 1.19) | 3.8E-01 |
| cg21232015 | CHFR      | chr12 | Body    | 0.78 | (0.45; 1.36) | 3.8E-01 |
| cg22801866 | TNRC18    | chr7  | Body    | 0.86 | (0.62; 1.2)  | 3.8E-01 |
| cg21282529 | NOL4L     | chr20 | Body    | 0.68 | (0.29; 1.61) | 3.8E-01 |
| cg14054343 | RTN4      | chr2  | TSS200  | 1.14 | (0.85; 1.53) | 3.8E-01 |
| cg14054343 | RTN4      | chr2  | Body    | 1.14 | (0.85; 1.53) | 3.8E-01 |
| cg25169875 | ZFP91     | chr11 | Body    | 1.15 | (0.84; 1.57) | 3.8E-01 |
| cg02945866 | PTPRN2    | chr7  | Body    | 0.86 | (0.62; 1.2)  | 3.8E-01 |
| cg17823892 | PDE8A     | chr15 | TSS200  | 0.87 | (0.64; 1.19) | 3.8E-01 |
| cg19112780 | PTPRU     | chr1  | 1stExon | 0.87 | (0.64; 1.19) | 3.8E-01 |
| cg19112780 | PTPRU     | chr1  | 5'UTR   | 0.87 | (0.64; 1.19) | 3.8E-01 |
| cg13693986 | PEX14     | chr1  | Body    | 0.85 | (0.6; 1.22)  | 3.8E-01 |
| cg02495518 | NRXN1     | chr2  | Body    | 1.13 | (0.85; 1.51) | 3.8E-01 |
| cg02495518 | NRXN1     | chr2  | TSS1500 | 1.13 | (0.85; 1.51) | 3.8E-01 |
| cg20314038 | CSMD2     | chr1  | Body    | 0.85 | (0.58; 1.24) | 3.8E-01 |
| cg10941174 | CNTNAP2   | chr7  | Body    | 1.15 | (0.84; 1.58) | 3.8E-01 |
| cg14754741 | PTPRU     | chr1  | Body    | 1.26 | (0.75; 2.12) | 3.9E-01 |
| cg14769786 | RTN4RL1   | chr17 | Body    | 0.86 | (0.61; 1.21) | 3.9E-01 |
| cg08606573 | CREBBP    | chr16 | Body    | 0.87 | (0.63; 1.2)  | 3.9E-01 |
| cg00222867 | PDE8A     | chr15 | Body    | 1.15 | (0.84; 1.58) | 3.9E-01 |
| cg17460368 | ZBTB20    | chr3  | 5'UTR   | 1.16 | (0.83; 1.63) | 3.9E-01 |
| cg00623698 | CHD6      | chr20 | Body    | 0.78 | (0.44; 1.37) | 3.9E-01 |
| cg07915399 | CSMD2     | chr1  | Body    | 1.21 | (0.79; 1.86) | 3.9E-01 |
| cg21793437 | CACNA1C   | chr12 | Body    | 0.79 | (0.47; 1.34) | 3.9E-01 |
| cg01155522 | TNRC6A    | chr16 | TSS200  | 1.16 | (0.83; 1.62) | 3.9E-01 |
| cg01221746 | TNRC18    | chr7  | Body    | 1.14 | (0.85; 1.54) | 3.9E-01 |
| cg09516231 | PTPRN2    | chr7  | Body    | 0.87 | (0.64; 1.19) | 3.9E-01 |
| cg07891033 | CTNND2    | chr5  | Body    | 0.87 | (0.62; 1.2)  | 3.9E-01 |
| cg07891033 | CTNND2    | chr5  | 5'UTR   | 0.87 | (0.62; 1.2)  | 3.9E-01 |
| cg03929057 | MEX3A     | chr1  | Body    | 0.88 | (0.65; 1.18) | 3.9E-01 |
| cg04985661 | PHACTR1   | chr6  | TSS1500 | 0.87 | (0.63; 1.2)  | 3.9E-01 |
| cg10231116 | PTPRN2    | chr7  | Body    | 0.88 | (0.65; 1.18) | 3.9E-01 |
| cg16761098 | POU2F1    | chr1  | Body    | 1.19 | (0.8; 1.77)  | 3.9E-01 |
| cg16245035 | PEX14     | chr1  | Body    | 1.16 | (0.83; 1.64) | 3.9E-01 |
| cg00570881 | ZBTB20    | chr3  | Body    | 1.22 | (0.77; 1.93) | 3.9E-01 |
| cg00570881 | ZBTB20    | chr3  | 5'UTR   | 1.22 | (0.77; 1.93) | 3.9E-01 |
| cg27308682 | PTPRN2    | chr7  | Body    | 0.85 | (0.58; 1.24) | 3.9E-01 |
| cg04215186 | TNRC6A    | chr16 | Body    | 0.86 | (0.62; 1.2)  | 3.9E-01 |
| cg16028694 | ALCAM     | chr3  | Body    | 0.87 | (0.64; 1.19) | 3.9E-01 |
| cg22823058 | CDH13     | chr16 | Body    | 0.85 | (0.59; 1.23) | 3.9E-01 |
| cg17139690 | PTPRN2    | chr7  | Body    | 0.88 | (0.65; 1.18) | 3.9E-01 |
| cg25816357 | GOLT1B    | chr12 | 3'UTR   | 0.87 | (0.63; 1.19) | 3.9E-01 |
| cg27364578 | PHACTR1   | chr6  | Body    | 1.15 | (0.84; 1.56) | 3.9E-01 |



|            |                     |       |         |      |              |         |
|------------|---------------------|-------|---------|------|--------------|---------|
| cg02551301 | <i>PTPRU</i>        | chr1  | Body    | 1.34 | (0.69; 2.58) | 3.9E-01 |
| cg02168291 | <i>CDH13</i>        | chr16 | Body    | 1.18 | (0.81; 1.7)  | 3.9E-01 |
| cg11835544 | <i>PTPRN2</i>       | chr7  | Body    | 0.86 | (0.61; 1.21) | 3.9E-01 |
| cg25625670 | <i>RTN4RL2</i>      | chr11 | Body    | 1.17 | (0.82; 1.68) | 3.9E-01 |
| cg16622958 | <i>FBXO31</i>       | chr16 | Body    | 1.14 | (0.84; 1.55) | 3.9E-01 |
| cg16622958 | <i>FBXO31</i>       | chr16 | 5'UTR   | 1.14 | (0.84; 1.55) | 3.9E-01 |
| cg16124293 | <i>CDH13</i>        | chr16 | Body    | 0.87 | (0.62; 1.2)  | 3.9E-01 |
| cg16124293 | <i>CDH13</i>        | chr16 | 5'UTR   | 0.87 | (0.62; 1.2)  | 3.9E-01 |
| cg16124293 | <i>CDH13</i>        | chr16 | 3'UTR   | 0.87 | (0.62; 1.2)  | 3.9E-01 |
| cg22236711 | <i>TNFRSF10B</i>    | chr8  | TSS1500 | 0.82 | (0.51; 1.3)  | 3.9E-01 |
| cg20450423 | <i>RTN4RL1</i>      | chr17 | Body    | 0.76 | (0.41; 1.41) | 3.9E-01 |
| cg27639457 | <i>CTNND2</i>       | chr5  | Body    | 0.83 | (0.54; 1.27) | 3.9E-01 |
| cg07524137 | <i>PTPRN2</i>       | chr7  | Body    | 0.86 | (0.61; 1.21) | 3.9E-01 |
| cg09390513 | <i>CACNA1C</i>      | chr12 | Body    | 0.78 | (0.44; 1.38) | 3.9E-01 |
| cg17178777 | <i>AKAP13</i>       | chr15 | 5'UTR   | 1.17 | (0.82; 1.68) | 3.9E-01 |
| cg22787816 | <i>SMARCD3</i>      | chr7  | TSS1500 | 0.87 | (0.63; 1.2)  | 3.9E-01 |
| cg11297016 | <i>TENM2</i>        | chr5  | Body    | 1.15 | (0.84; 1.57) | 3.9E-01 |
| cg17599372 | <i>PTPRN2</i>       | chr7  | Body    | 1.15 | (0.84; 1.58) | 3.9E-01 |
| cg03021296 | <i>PTPRN2</i>       | chr7  | Body    | 0.87 | (0.64; 1.19) | 3.9E-01 |
| cg10989897 | <i>ELAVL4</i>       | chr1  | TSS200  | 1.16 | (0.82; 1.64) | 3.9E-01 |
| cg04471171 | <i>CSMD2</i>        | chr1  | Body    | 1.15 | (0.84; 1.56) | 3.9E-01 |
| cg14851949 | <i>ARID1A</i>       | chr1  | TSS1500 | 0.87 | (0.64; 1.19) | 3.9E-01 |
| cg03660034 | <i>TNRC6C</i>       | chr17 | 5'UTR   | 0.83 | (0.53; 1.28) | 3.9E-01 |
| cg16232702 | <i>DDHD2</i>        | chr8  | 5'UTR   | 1.15 | (0.83; 1.59) | 3.9E-01 |
| cg16232702 | <i>DDHD2</i>        | chr8  | TSS200  | 1.15 | (0.83; 1.59) | 3.9E-01 |
| cg03336706 | <i>TNR</i>          | chr1  | 5'UTR   | 0.85 | (0.59; 1.23) | 3.9E-01 |
| cg20057752 | <i>TENM2</i>        | chr5  | Body    | 0.87 | (0.64; 1.19) | 3.9E-01 |
| cg07085167 | <i>FBXO34</i>       | chr14 | 5'UTR   | 1.15 | (0.84; 1.56) | 3.9E-01 |
| cg13287266 | <i>PTPRS</i>        | chr19 | 3'UTR   | 1.15 | (0.84; 1.56) | 3.9E-01 |
| cg17628100 | <i>WWOX</i>         | chr16 | Body    | 0.81 | (0.49; 1.32) | 3.9E-01 |
| cg02064636 | <i>CACNA1C-IT2</i>  | chr12 | Body    | 0.82 | (0.52; 1.29) | 3.9E-01 |
| cg04195892 | <i>CUX2</i>         | chr12 | Body    | 1.19 | (0.8; 1.77)  | 3.9E-01 |
| cg11904912 | <i>CTNND2</i>       | chr5  | Body    | 0.78 | (0.44; 1.38) | 3.9E-01 |
| cg24410136 | <i>RTN4RL1</i>      | chr17 | Body    | 0.85 | (0.59; 1.23) | 3.9E-01 |
| cg13069413 | <i>CDH13</i>        | chr16 | 5'UTR   | 1.18 | (0.81; 1.71) | 3.9E-01 |
| cg13069413 | <i>CDH13</i>        | chr16 | Body    | 1.18 | (0.81; 1.71) | 3.9E-01 |
| cg25429902 | <i>CNTNAP2</i>      | chr7  | Body    | 0.83 | (0.54; 1.27) | 3.9E-01 |
| cg12448545 | <i>FBXO11</i>       | chr2  | TSS1500 | 1.15 | (0.83; 1.6)  | 3.9E-01 |
| cg04003505 | <i>TNFRSF1B</i>     | chr1  | Body    | 0.88 | (0.66; 1.18) | 3.9E-01 |
| cg25847835 | <i>FBXO38</i>       | chr5  | 5'UTR   | 0.87 | (0.63; 1.2)  | 3.9E-01 |
| cg04249032 | <i>PTPRN2</i>       | chr7  | Body    | 0.87 | (0.64; 1.19) | 3.9E-01 |
| cg00085713 | <i>CTDSPL</i>       | chr3  | Body    | 1.25 | (0.75; 2.08) | 3.9E-01 |
| cg22508930 | <i>RAP1B</i>        | chr12 | 5'UTR   | 0.84 | (0.57; 1.25) | 3.9E-01 |
| cg13658711 | <i>LOC101928417</i> | chr16 | TSS200  | 0.88 | (0.65; 1.18) | 3.9E-01 |
| cg13658711 | <i>CDH13</i>        | chr16 | 5'UTR   | 0.88 | (0.65; 1.18) | 3.9E-01 |
| cg13658711 | <i>CDH13</i>        | chr16 | Body    | 0.88 | (0.65; 1.18) | 3.9E-01 |
| cg02790932 | <i>UBE2E2</i>       | chr3  | Body    | 1.19 | (0.8; 1.77)  | 3.9E-01 |
| cg26482757 | <i>AKAP13</i>       | chr15 | 5'UTR   | 0.87 | (0.64; 1.19) | 3.9E-01 |
| cg16072211 | <i>ATP6V0C</i>      | chr16 | TSS1500 | 1.18 | (0.81; 1.71) | 3.9E-01 |
| cg21148737 | <i>ERI3</i>         | chr1  | Body    | 1.18 | (0.81; 1.72) | 4.0E-01 |
| cg16988976 | <i>TXNDC9</i>       | chr2  | TSS200  | 1.15 | (0.83; 1.59) | 4.0E-01 |
| cg27113326 | <i>PTPRN2</i>       | chr7  | Body    | 0.86 | (0.61; 1.21) | 4.0E-01 |
| cg19260567 | <i>CNTNAP2</i>      | chr7  | Body    | 1.17 | (0.82; 1.67) | 4.0E-01 |
| cg02991464 | <i>CACNA1C</i>      | chr12 | Body    | 1.16 | (0.82; 1.65) | 4.0E-01 |
| cg07213780 | <i>PTPRN2</i>       | chr7  | Body    | 1.15 | (0.84; 1.57) | 4.0E-01 |
| cg12228319 | <i>BRUNOL4</i>      | chr18 | Body    | 1.16 | (0.82; 1.63) | 4.0E-01 |
| cg00533835 | <i>PTPRN2</i>       | chr7  | Body    | 0.86 | (0.61; 1.21) | 4.0E-01 |
| cg27550672 | <i>MTCL1</i>        | chr18 | Body    | 0.86 | (0.61; 1.21) | 4.0E-01 |
| cg04818078 | <i>CREBBP</i>       | chr16 | Body    | 0.83 | (0.53; 1.29) | 4.0E-01 |
| cg05832514 | <i>WWOX</i>         | chr16 | Body    | 0.86 | (0.6; 1.22)  | 4.0E-01 |
| cg08442028 | <i>FBXO31</i>       | chr16 | TSS200  | 0.87 | (0.63; 1.2)  | 4.0E-01 |



|            |              |       |         |      |              |         |
|------------|--------------|-------|---------|------|--------------|---------|
| cg02345961 | BRUNOL4      | chr18 | Body    | 1.17 | (0.82; 1.67) | 4.0E-01 |
| cg23520260 | COL5A2       | chr2  | Body    | 0.86 | (0.61; 1.21) | 4.0E-01 |
| cg14649924 | PEX14        | chr1  | 1stExon | 1.14 | (0.84; 1.55) | 4.0E-01 |
| cg19026976 | BRUNOL4      | chr18 | Body    | 1.14 | (0.84; 1.56) | 4.0E-01 |
| cg16427703 | GNA12        | chr7  | Body    | 1.24 | (0.75; 2.06) | 4.0E-01 |
| cg06309497 | PEX14        | chr1  | TSS1500 | 0.87 | (0.63; 1.2)  | 4.0E-01 |
| cg05389560 | RECQL        | chr12 | TSS200  | 0.84 | (0.55; 1.26) | 4.0E-01 |
| cg05389560 | GOLT1B       | chr12 | TSS200  | 0.84 | (0.55; 1.26) | 4.0E-01 |
| cg08166487 | TNRC18       | chr7  | Body    | 1.17 | (0.82; 1.66) | 4.0E-01 |
| cg22820375 | ERI3         | chr1  | Body    | 0.85 | (0.59; 1.23) | 4.0E-01 |
| cg22820375 | ERI3         | chr1  | 5'UTR   | 0.85 | (0.59; 1.23) | 4.0E-01 |
| cg21040417 | NRXN1        | chr2  | Body    | 1.15 | (0.83; 1.61) | 4.0E-01 |
| cg18732758 | TNRC18       | chr7  | Body    | 0.84 | (0.56; 1.26) | 4.0E-01 |
| cg04405760 | CSMD2        | chr1  | Body    | 0.83 | (0.55; 1.27) | 4.0E-01 |
| cg11398400 | RTN4RL1      | chr17 | Body    | 0.88 | (0.65; 1.19) | 4.0E-01 |
| cg13732622 | CHCHD6       | chr3  | Body    | 0.88 | (0.65; 1.19) | 4.0E-01 |
| cg13447539 | UBE2E2       | chr3  | TSS1500 | 1.2  | (0.78; 1.85) | 4.0E-01 |
| cg18383872 | CDH13        | chr16 | Body    | 0.86 | (0.6; 1.22)  | 4.0E-01 |
| cg18383872 | LOC101928417 | chr16 | TSS1500 | 0.86 | (0.6; 1.22)  | 4.0E-01 |
| cg18383872 | CDH13        | chr16 | 5'UTR   | 0.86 | (0.6; 1.22)  | 4.0E-01 |
| cg12241755 | DACH1        | chr13 | Body    | 1.22 | (0.77; 1.95) | 4.0E-01 |
| cg06045579 | FBXO31       | chr16 | Body    | 1.14 | (0.84; 1.57) | 4.0E-01 |
| cg11791210 | NOL4         | chr18 | TSS1500 | 0.88 | (0.65; 1.19) | 4.0E-01 |
| cg01731811 | PTPRN2       | chr7  | Body    | 1.15 | (0.83; 1.6)  | 4.0E-01 |
| cg07765403 | CSMD2        | chr1  | Body    | 1.18 | (0.8; 1.74)  | 4.0E-01 |
| cg06362743 | CACNA1C      | chr12 | Body    | 1.15 | (0.83; 1.59) | 4.0E-01 |
| cg22019360 | ORC4         | chr2  | TSS1500 | 0.87 | (0.62; 1.21) | 4.0E-01 |
| cg22019360 | MBD5         | chr2  | 5'UTR   | 0.87 | (0.62; 1.21) | 4.0E-01 |
| cg04720886 | CNTNAP2      | chr7  | Body    | 0.88 | (0.65; 1.19) | 4.0E-01 |
| cg06058529 | PTPRN2       | chr7  | Body    | 1.17 | (0.81; 1.7)  | 4.0E-01 |
| cg21819722 | ATP8A1       | chr4  | Body    | 0.86 | (0.61; 1.22) | 4.0E-01 |
| cg11309704 | PTPRN2       | chr7  | Body    | 1.15 | (0.83; 1.61) | 4.0E-01 |
| cg06194010 | CACNA1C      | chr12 | Body    | 0.88 | (0.64; 1.19) | 4.0E-01 |
| cg23774857 | FSTL1        | chr3  | Body    | 0.71 | (0.32; 1.57) | 4.0E-01 |
| cg23250289 | SRSF12       | chr6  | ExonBnd | 0.86 | (0.6; 1.23)  | 4.0E-01 |
| cg23250289 | SRSF12       | chr6  | Body    | 0.86 | (0.6; 1.23)  | 4.0E-01 |
| cg25319656 | PTPRN2       | chr7  | Body    | 0.88 | (0.64; 1.19) | 4.0E-01 |
| cg22051883 | WWOX         | chr16 | 5'UTR   | 0.87 | (0.62; 1.21) | 4.0E-01 |
| cg22051883 | WWOX         | chr16 | Body    | 0.87 | (0.62; 1.21) | 4.0E-01 |
| cg22051883 | WWOX         | chr16 | 1stExon | 0.87 | (0.62; 1.21) | 4.0E-01 |
| cg12903638 | UNC80        | chr2  | TSS1500 | 1.16 | (0.82; 1.64) | 4.0E-01 |
| cg13977618 | CACNA1C-AS4  | chr12 | TSS200  | 0.84 | (0.56; 1.26) | 4.0E-01 |
| cg13977618 | CACNA1C      | chr12 | Body    | 0.84 | (0.56; 1.26) | 4.0E-01 |
| cg02183950 | FBXO32       | chr8  | 5'UTR   | 1.14 | (0.84; 1.55) | 4.0E-01 |
| cg02183950 | FBXO32       | chr8  | Body    | 1.14 | (0.84; 1.55) | 4.0E-01 |
| cg04629753 | ZBTB20       | chr3  | 5'UTR   | 1.29 | (0.71; 2.36) | 4.0E-01 |
| cg04629753 | ZBTB20       | chr3  | TSS200  | 1.29 | (0.71; 2.36) | 4.0E-01 |
| cg03147394 | NOL4         | chr18 | Body    | 1.16 | (0.82; 1.65) | 4.0E-01 |
| cg13316262 | COL5A2       | chr2  | Body    | 0.84 | (0.56; 1.26) | 4.0E-01 |
| cg06081628 | CACNA1C      | chr12 | Body    | 0.87 | (0.63; 1.2)  | 4.0E-01 |
| cg15508169 | PTPRN2       | chr7  | Body    | 0.87 | (0.64; 1.2)  | 4.0E-01 |
| cg19071854 | CUX2         | chr12 | Body    | 0.84 | (0.56; 1.26) | 4.0E-01 |
| cg10589094 | TNFRSF1A     | chr12 | TSS1500 | 1.18 | (0.8; 1.74)  | 4.0E-01 |
| cg17408552 | CPEB1        | chr15 | Body    | 1.16 | (0.82; 1.64) | 4.0E-01 |
| cg17408552 | CPEB1        | chr15 | 5'UTR   | 1.16 | (0.82; 1.64) | 4.0E-01 |
| cg17574877 | CACNA1C      | chr12 | Body    | 0.87 | (0.64; 1.2)  | 4.0E-01 |
| cg09998033 | PTPRN2       | chr7  | Body    | 0.87 | (0.62; 1.21) | 4.0E-01 |
| cg00801394 | ATF7         | chr12 | 3'UTR   | 0.87 | (0.64; 1.2)  | 4.0E-01 |
| cg00801394 | ATF7         | chr12 | Body    | 0.87 | (0.64; 1.2)  | 4.0E-01 |
| cg22544914 | CUX2         | chr12 | Body    | 1.2  | (0.78; 1.85) | 4.0E-01 |
| cg08460153 | TNRC18       | chr7  | 5'UTR   | 0.87 | (0.63; 1.21) | 4.0E-01 |



|            |                  |       |         |      |              |         |
|------------|------------------|-------|---------|------|--------------|---------|
| cg10243459 | <i>PTPRN2</i>    | chr7  | Body    | 1.17 | (0.81; 1.69) | 4.0E-01 |
| cg09183316 | <i>CTDSP2</i>    | chr12 | Body    | 0.78 | (0.43; 1.4)  | 4.0E-01 |
| cg12605080 | <i>CTDSPL</i>    | chr3  | Body    | 0.86 | (0.61; 1.22) | 4.0E-01 |
| cg11642769 | <i>UBE2E2</i>    | chr3  | Body    | 1.18 | (0.8; 1.74)  | 4.0E-01 |
| cg08602500 | <i>PTPRN2</i>    | chr7  | Body    | 0.86 | (0.62; 1.21) | 4.0E-01 |
| cg20654733 | <i>PTPRN2</i>    | chr7  | Body    | 0.87 | (0.63; 1.2)  | 4.0E-01 |
| cg20572374 | <i>TNFRSF1B</i>  | chr1  | Body    | 0.72 | (0.34; 1.55) | 4.0E-01 |
| cg01566906 | <i>ALCAM</i>     | chr3  | Body    | 0.87 | (0.62; 1.21) | 4.0E-01 |
| cg20964024 | <i>CUX2</i>      | chr12 | Body    | 1.15 | (0.83; 1.58) | 4.0E-01 |
| cg01681990 | <i>PTPRN2</i>    | chr7  | Body    | 0.87 | (0.62; 1.22) | 4.0E-01 |
| cg05241596 | <i>UBE2E2</i>    | chr3  | Body    | 0.87 | (0.63; 1.2)  | 4.0E-01 |
| cg00043265 | <i>FBXO34</i>    | chr14 | 1stExon | 1.15 | (0.83; 1.59) | 4.0E-01 |
| cg00043265 | <i>FBXO34</i>    | chr14 | 5'UTR   | 1.15 | (0.83; 1.59) | 4.0E-01 |
| cg15981875 | <i>TNFRSF11A</i> | chr18 | Body    | 1.16 | (0.82; 1.65) | 4.0E-01 |
| cg07388254 | <i>WWOX</i>      | chr16 | Body    | 1.13 | (0.85; 1.51) | 4.0E-01 |
| cg06655494 | <i>TNRC18</i>    | chr7  | Body    | 0.87 | (0.63; 1.21) | 4.0E-01 |
| cg16076783 | <i>RTN4RL1</i>   | chr17 | 1stExon | 1.17 | (0.81; 1.69) | 4.0E-01 |
| cg16076783 | <i>RTN4RL1</i>   | chr17 | 5'UTR   | 1.17 | (0.81; 1.69) | 4.0E-01 |
| cg00039463 | <i>CREBBP</i>    | chr16 | TSS1500 | 1.17 | (0.81; 1.67) | 4.0E-01 |
| cg01973089 | <i>RECQL5</i>    | chr17 | 3'UTR   | 0.86 | (0.61; 1.22) | 4.1E-01 |
| cg01973089 | <i>RECQL5</i>    | chr17 | Body    | 0.86 | (0.61; 1.22) | 4.1E-01 |
| cg24008619 | <i>TNRC6C</i>    | chr17 | 5'UTR   | 0.87 | (0.62; 1.22) | 4.1E-01 |
| cg21580421 | <i>CCDC80</i>    | chr3  | TSS1500 | 1.16 | (0.81; 1.66) | 4.1E-01 |
| cg10965405 | <i>CDH13</i>     | chr16 | 5'UTR   | 1.19 | (0.79; 1.81) | 4.1E-01 |
| cg10965405 | <i>CDH13</i>     | chr16 | Body    | 1.19 | (0.79; 1.81) | 4.1E-01 |
| cg00312767 | <i>TNR</i>       | chr1  | Body    | 0.85 | (0.57; 1.25) | 4.1E-01 |
| cg11221049 | <i>FBXO33</i>    | chr14 | 1stExon | 0.87 | (0.62; 1.21) | 4.1E-01 |
| cg03619683 | <i>ZBTB20</i>    | chr3  | ExonBnd | 0.87 | (0.63; 1.21) | 4.1E-01 |
| cg03619683 | <i>ZBTB20</i>    | chr3  | Body    | 0.87 | (0.63; 1.21) | 4.1E-01 |
| cg03619683 | <i>ZBTB20</i>    | chr3  | 5'UTR   | 0.87 | (0.63; 1.21) | 4.1E-01 |
| cg14219411 | <i>CEP350</i>    | chr1  | Body    | 0.85 | (0.57; 1.26) | 4.1E-01 |
| cg14840163 | <i>TNFRSF10B</i> | chr8  | Body    | 0.87 | (0.64; 1.2)  | 4.1E-01 |
| cg09900102 | <i>WWOX</i>      | chr16 | Body    | 0.87 | (0.62; 1.22) | 4.1E-01 |
| cg06331531 | <i>PTPRN2</i>    | chr7  | Body    | 1.15 | (0.83; 1.59) | 4.1E-01 |
| cg15289882 | <i>PTPRN2</i>    | chr7  | Body    | 0.87 | (0.62; 1.21) | 4.1E-01 |
| cg06228260 | <i>PTPRN2</i>    | chr7  | Body    | 1.15 | (0.83; 1.59) | 4.1E-01 |
| cg17859326 | <i>MTNR1A</i>    | chr4  | Body    | 0.87 | (0.62; 1.21) | 4.1E-01 |
| cg11277907 | <i>CHD6</i>      | chr20 | 5'UTR   | 1.24 | (0.75; 2.06) | 4.1E-01 |
| cg27482690 | <i>TNRC18</i>    | chr7  | Body    | 1.19 | (0.79; 1.8)  | 4.1E-01 |
| cg02521637 | <i>PTPRN2</i>    | chr7  | Body    | 0.86 | (0.6; 1.23)  | 4.1E-01 |
| cg12439903 | <i>MTCL1</i>     | chr18 | 5'UTR   | 1.15 | (0.82; 1.62) | 4.1E-01 |
| cg06479057 | <i>CCDC80</i>    | chr3  | Body    | 0.87 | (0.61; 1.22) | 4.1E-01 |
| cg26784952 | <i>DACH1</i>     | chr13 | TSS1500 | 1.2  | (0.78; 1.83) | 4.1E-01 |
| cg14321334 | <i>UNC80</i>     | chr2  | Body    | 1.2  | (0.78; 1.85) | 4.1E-01 |
| cg08192683 | <i>PTPRN2</i>    | chr7  | Body    | 0.87 | (0.63; 1.21) | 4.1E-01 |
| cg22868346 | <i>EIF2S1</i>    | chr14 | TSS200  | 1.14 | (0.84; 1.56) | 4.1E-01 |
| cg24517400 | <i>EIF2S1</i>    | chr14 | TSS200  | 1.14 | (0.83; 1.57) | 4.1E-01 |
| cg13726218 | <i>DACH1</i>     | chr13 | Body    | 0.83 | (0.53; 1.3)  | 4.1E-01 |
| cg18011899 | <i>PTPRN2</i>    | chr7  | Body    | 0.86 | (0.59; 1.24) | 4.1E-01 |
| cg09567735 | <i>CUX2</i>      | chr12 | Body    | 1.14 | (0.83; 1.56) | 4.1E-01 |
| cg09460267 | <i>MEIS2</i>     | chr15 | Body    | 1.15 | (0.83; 1.6)  | 4.1E-01 |
| cg23304647 | <i>GNA12</i>     | chr7  | Body    | 0.66 | (0.25; 1.76) | 4.1E-01 |
| cg10700964 | <i>TNFRSF10B</i> | chr8  | TSS200  | 1.14 | (0.84; 1.56) | 4.1E-01 |
| cg07902731 | <i>FBXO31</i>    | chr16 | Body    | 1.15 | (0.82; 1.62) | 4.1E-01 |
| cg07131790 | <i>POU2F1</i>    | chr1  | Body    | 1.15 | (0.83; 1.6)  | 4.1E-01 |
| cg17447802 | <i>RTN4RL1</i>   | chr17 | Body    | 1.21 | (0.77; 1.89) | 4.1E-01 |
| cg27259807 | <i>MTCL1</i>     | chr18 | Body    | 1.14 | (0.83; 1.57) | 4.1E-01 |
| cg20222988 | <i>TENM2</i>     | chr5  | Body    | 1.16 | (0.82; 1.64) | 4.1E-01 |
| cg16503683 | <i>ZFP91</i>     | chr11 | TSS1500 | 0.87 | (0.62; 1.21) | 4.1E-01 |
| cg17538556 | <i>FBXO38</i>    | chr5  | Body    | 0.87 | (0.63; 1.21) | 4.1E-01 |
| cg00209424 | <i>RTN4</i>      | chr2  | TSS200  | 1.15 | (0.82; 1.61) | 4.1E-01 |



|            |                     |       |         |      |              |         |
|------------|---------------------|-------|---------|------|--------------|---------|
| cg24736834 | <i>PDE8A</i>        | chr15 | TSS200  | 0.86 | (0.6; 1.24)  | 4.1E-01 |
| cg07951978 | <i>CHFR</i>         | chr12 | TSS1500 | 0.87 | (0.63; 1.2)  | 4.1E-01 |
| cg25977304 | <i>POU2F1</i>       | chr1  | TSS1500 | 1.15 | (0.83; 1.59) | 4.1E-01 |
| cg01679225 | <i>PTPRN2</i>       | chr7  | Body    | 1.15 | (0.83; 1.6)  | 4.1E-01 |
| cg05821571 | <i>PTPRN2</i>       | chr7  | Body    | 0.87 | (0.62; 1.21) | 4.1E-01 |
| cg25143162 | <i>PTPRN2</i>       | chr7  | Body    | 1.15 | (0.82; 1.61) | 4.1E-01 |
| cg16725583 | <i>ZFP91</i>        | chr11 | TSS200  | 1.14 | (0.84; 1.54) | 4.1E-01 |
| cg00224086 | <i>PTPRN2</i>       | chr7  | Body    | 1.14 | (0.84; 1.54) | 4.1E-01 |
| cg22326754 | <i>ATF7IP2</i>      | chr16 | TSS1500 | 1.12 | (0.85; 1.49) | 4.1E-01 |
| cg14581304 | <i>TENM2</i>        | chr5  | Body    | 0.83 | (0.54; 1.29) | 4.1E-01 |
| cg21755737 | <i>PTPRN2</i>       | chr7  | Body    | 1.13 | (0.85; 1.5)  | 4.1E-01 |
| cg03140190 | <i>CREBBP</i>       | chr16 | Body    | 0.84 | (0.55; 1.27) | 4.1E-01 |
| cg14063566 | <i>LOC100130933</i> | chr17 | 1stExon | 0.86 | (0.59; 1.24) | 4.1E-01 |
| cg14063566 | <i>LOC100130933</i> | chr17 | 5'UTR   | 0.86 | (0.59; 1.24) | 4.1E-01 |
| cg14063566 | <i>RECQL5</i>       | chr17 | Body    | 0.86 | (0.59; 1.24) | 4.1E-01 |
| cg17310427 | <i>ELAVL4</i>       | chr1  | Body    | 1.17 | (0.81; 1.69) | 4.1E-01 |
| cg13592941 | <i>CUX2</i>         | chr12 | Body    | 1.22 | (0.76; 1.95) | 4.1E-01 |
| cg15681130 | <i>RTN4RL1</i>      | chr17 | Body    | 1.13 | (0.84; 1.52) | 4.1E-01 |
| cg18801028 | <i>PTPRU</i>        | chr1  | Body    | 1.17 | (0.81; 1.68) | 4.1E-01 |
| cg11551090 | <i>CTNND2</i>       | chr5  | Body    | 0.86 | (0.61; 1.22) | 4.1E-01 |
| cg11551090 | <i>CTNND2</i>       | chr5  | ExonBnd | 0.86 | (0.61; 1.22) | 4.1E-01 |
| cg10452410 | <i>PTPRN2</i>       | chr7  | Body    | 1.22 | (0.76; 1.94) | 4.1E-01 |
| cg02637474 | <i>PTPRN2</i>       | chr7  | Body    | 1.17 | (0.8; 1.72)  | 4.1E-01 |
| cg13210517 | <i>CHCHD6</i>       | chr3  | Body    | 0.88 | (0.64; 1.2)  | 4.1E-01 |
| cg05820157 | <i>FBXO31</i>       | chr16 | Body    | 1.15 | (0.82; 1.62) | 4.1E-01 |
| cg16734845 | <i>CTDSPL2</i>      | chr15 | Body    | 0.85 | (0.59; 1.24) | 4.1E-01 |
| cg09220440 | <i>PTPRN2</i>       | chr7  | Body    | 1.15 | (0.82; 1.63) | 4.1E-01 |
| cg10853728 | <i>CDH11</i>        | chr16 | Body    | 1.16 | (0.82; 1.64) | 4.1E-01 |
| cg02330706 | <i>RECQL5</i>       | chr17 | Body    | 1.16 | (0.81; 1.67) | 4.1E-01 |
| cg04050763 | <i>ZFP91</i>        | chr11 | TSS1500 | 0.85 | (0.57; 1.26) | 4.1E-01 |
| cg21015966 | <i>ZNF704</i>       | chr8  | TSS1500 | 0.85 | (0.58; 1.25) | 4.1E-01 |
| cg01098010 | <i>TAOK3</i>        | chr12 | 5'UTR   | 0.86 | (0.59; 1.24) | 4.1E-01 |
| cg00820422 | <i>PTPRN2</i>       | chr7  | Body    | 0.89 | (0.66; 1.19) | 4.1E-01 |
| cg16973203 | <i>FBXO36</i>       | chr2  | 3'UTR   | 1.27 | (0.72; 2.24) | 4.1E-01 |
| cg17246726 | <i>FBXO31</i>       | chr16 | Body    | 1.14 | (0.83; 1.58) | 4.1E-01 |
| cg17246726 | <i>FBXO31</i>       | chr16 | 5'UTR   | 1.14 | (0.83; 1.58) | 4.1E-01 |
| cg18735473 | <i>BRUNOL4</i>      | chr18 | Body    | 1.16 | (0.81; 1.67) | 4.1E-01 |
| cg04486940 | <i>ERI3</i>         | chr1  | Body    | 1.14 | (0.83; 1.55) | 4.1E-01 |
| cg25588935 | <i>PTPRN2</i>       | chr7  | Body    | 1.15 | (0.82; 1.6)  | 4.1E-01 |
| cg08708194 | <i>CHD6</i>         | chr20 | Body    | 0.77 | (0.41; 1.44) | 4.1E-01 |
| cg21753616 | <i>PTPRN2</i>       | chr7  | Body    | 1.13 | (0.84; 1.51) | 4.1E-01 |
| cg27015761 | <i>ATP8A1</i>       | chr4  | TSS200  | 0.88 | (0.66; 1.19) | 4.1E-01 |
| cg12656227 | <i>PTPRN2</i>       | chr7  | Body    | 1.14 | (0.83; 1.57) | 4.1E-01 |
| cg11760198 | <i>BRUNOL4</i>      | chr18 | Body    | 1.18 | (0.79; 1.76) | 4.1E-01 |
| cg03960595 | <i>PTPRN2</i>       | chr7  | Body    | 0.88 | (0.64; 1.2)  | 4.1E-01 |
| cg03069726 | <i>UBE2E2</i>       | chr3  | Body    | 1.17 | (0.81; 1.69) | 4.1E-01 |
| cg05729908 | <i>TAOK3</i>        | chr12 | TSS1500 | 1.13 | (0.84; 1.54) | 4.1E-01 |
| cg01415857 | <i>PTPRN2</i>       | chr7  | Body    | 1.15 | (0.83; 1.59) | 4.2E-01 |
| cg19237294 | <i>BRUNOL4</i>      | chr18 | Body    | 0.85 | (0.56; 1.27) | 4.2E-01 |
| cg07011179 | <i>PTPRN2</i>       | chr7  | Body    | 0.85 | (0.58; 1.26) | 4.2E-01 |
| cg17387870 | <i>CHFR</i>         | chr12 | Body    | 1.15 | (0.83; 1.59) | 4.2E-01 |
| cg10320201 | <i>CDH13</i>        | chr16 | Body    | 1.13 | (0.84; 1.51) | 4.2E-01 |
| cg20985897 | <i>PTPRN2</i>       | chr7  | Body    | 0.87 | (0.63; 1.21) | 4.2E-01 |
| cg10576516 | <i>RECQL5</i>       | chr17 | TSS200  | 1.14 | (0.83; 1.58) | 4.2E-01 |
| cg21802863 | <i>NRXN1</i>        | chr2  | Body    | 1.14 | (0.83; 1.58) | 4.2E-01 |
| cg05643579 | <i>CTDSPL</i>       | chr3  | Body    | 0.74 | (0.35; 1.54) | 4.2E-01 |
| cg08729730 | <i>PTPRN2</i>       | chr7  | Body    | 1.19 | (0.78; 1.81) | 4.2E-01 |
| cg17345887 | <i>CDH13</i>        | chr16 | 5'UTR   | 0.86 | (0.6; 1.24)  | 4.2E-01 |
| cg17345887 | <i>CDH13</i>        | chr16 | Body    | 0.86 | (0.6; 1.24)  | 4.2E-01 |
| cg06420305 | <i>WWOX</i>         | chr16 | TSS1500 | 0.88 | (0.66; 1.19) | 4.2E-01 |
| cg25333826 | <i>RTN4</i>         | chr2  | Body    | 1.15 | (0.82; 1.62) | 4.2E-01 |



|            |                 |       |         |      |              |         |
|------------|-----------------|-------|---------|------|--------------|---------|
| cg25333826 | <i>RTN4</i>     | chr2  | 5'UTR   | 1.15 | (0.82; 1.62) | 4.2E-01 |
| cg26201240 | <i>CDH13</i>    | chr16 | TSS1500 | 0.88 | (0.65; 1.2)  | 4.2E-01 |
| cg02470440 | <i>PTPRN2</i>   | chr7  | Body    | 0.88 | (0.64; 1.21) | 4.2E-01 |
| cg26377120 | <i>GNA12</i>    | chr7  | Body    | 1.42 | (0.61; 3.28) | 4.2E-01 |
| cg23039316 | <i>TNFRSF1A</i> | chr12 | TSS1500 | 1.15 | (0.82; 1.64) | 4.2E-01 |
| cg13832622 | <i>ORC4</i>     | chr2  | 5'UTR   | 1.13 | (0.84; 1.53) | 4.2E-01 |
| cg13832622 | <i>MBD5</i>     | chr2  | TSS1500 | 1.13 | (0.84; 1.53) | 4.2E-01 |
| cg21323106 | <i>PTPRN2</i>   | chr7  | Body    | 0.88 | (0.63; 1.21) | 4.2E-01 |
| cg15878673 | <i>DMXL2</i>    | chr15 | Body    | 1.2  | (0.77; 1.88) | 4.2E-01 |
| cg22451479 | <i>CTNND2</i>   | chr5  | Body    | 0.85 | (0.58; 1.25) | 4.2E-01 |
| cg22451479 | <i>CTNND2</i>   | chr5  | 5'UTR   | 0.85 | (0.58; 1.25) | 4.2E-01 |
| cg22451479 | <i>CTNND2</i>   | chr5  | TSS1500 | 0.85 | (0.58; 1.25) | 4.2E-01 |
| cg19268477 | <i>PTPRN2</i>   | chr7  | Body    | 1.14 | (0.83; 1.58) | 4.2E-01 |
| cg18161374 | <i>BRUNOL4</i>  | chr18 | TSS200  | 0.86 | (0.59; 1.24) | 4.2E-01 |
| cg14127859 | <i>BARX1</i>    | chr9  | Body    | 0.82 | (0.51; 1.32) | 4.2E-01 |
| cg22791324 | <i>PTPRN2</i>   | chr7  | Body    | 0.88 | (0.65; 1.2)  | 4.2E-01 |
| cg09000502 | <i>CTDSPL</i>   | chr3  | Body    | 0.72 | (0.33; 1.59) | 4.2E-01 |
| cg11688874 | <i>WAC</i>      | chr10 | Body    | 0.88 | (0.64; 1.21) | 4.2E-01 |
| cg11688874 | <i>WAC</i>      | chr10 | 1stExon | 0.88 | (0.64; 1.21) | 4.2E-01 |
| cg11688874 | <i>WAC</i>      | chr10 | 5'UTR   | 0.88 | (0.64; 1.21) | 4.2E-01 |
| cg15669816 | <i>ZNF704</i>   | chr8  | Body    | 0.85 | (0.56; 1.27) | 4.2E-01 |
| cg17613241 | <i>TENM2</i>    | chr5  | Body    | 0.88 | (0.64; 1.2)  | 4.2E-01 |
| cg22994649 | <i>PTPRN2</i>   | chr7  | Body    | 0.87 | (0.61; 1.23) | 4.2E-01 |
| cg15922680 | <i>POU2F1</i>   | chr1  | Body    | 1.15 | (0.82; 1.61) | 4.2E-01 |
| cg19091386 | <i>PTPRN2</i>   | chr7  | Body    | 0.88 | (0.65; 1.2)  | 4.2E-01 |
| cg06183333 | <i>TAOK3</i>    | chr12 | 5'UTR   | 0.86 | (0.6; 1.23)  | 4.2E-01 |
| cg15520292 | <i>ATF7</i>     | chr12 | 5'UTR   | 0.89 | (0.66; 1.19) | 4.2E-01 |
| cg15520292 | <i>ATF7</i>     | chr12 | TSS200  | 0.89 | (0.66; 1.19) | 4.2E-01 |
| cg15520292 | <i>ATF7</i>     | chr12 | Body    | 0.89 | (0.66; 1.19) | 4.2E-01 |
| cg10800941 | <i>WWOX</i>     | chr16 | Body    | 0.88 | (0.63; 1.21) | 4.2E-01 |
| cg26034624 | <i>MEIS2</i>    | chr15 | Body    | 1.17 | (0.8; 1.69)  | 4.2E-01 |
| cg12867150 | <i>PTPRU</i>    | chr1  | Body    | 1.18 | (0.79; 1.78) | 4.2E-01 |
| cg27598576 | <i>ATF7</i>     | chr12 | 5'UTR   | 0.66 | (0.24; 1.82) | 4.2E-01 |
| cg27598576 | <i>ATF7</i>     | chr12 | Body    | 0.66 | (0.24; 1.82) | 4.2E-01 |
| cg00207244 | <i>PTPRN2</i>   | chr7  | Body    | 1.16 | (0.81; 1.64) | 4.2E-01 |
| cg07613284 | <i>CHCHD6</i>   | chr3  | Body    | 0.83 | (0.53; 1.3)  | 4.2E-01 |
| cg04944477 | <i>SCAF8</i>    | chr6  | Body    | 0.87 | (0.63; 1.22) | 4.2E-01 |
| cg23794430 | <i>SGIP1</i>    | chr1  | Body    | 1.17 | (0.8; 1.73)  | 4.2E-01 |
| cg26985080 | <i>BARX2</i>    | chr11 | Body    | 0.83 | (0.53; 1.3)  | 4.2E-01 |
| cg12378726 | <i>CTDSPL</i>   | chr3  | Body    | 0.88 | (0.64; 1.2)  | 4.2E-01 |
| cg14248352 | <i>CNTNAP2</i>  | chr7  | Body    | 0.87 | (0.62; 1.22) | 4.2E-01 |
| cg02046881 | <i>GNA12</i>    | chr7  | Body    | 0.89 | (0.66; 1.19) | 4.2E-01 |
| cg02312706 | <i>FBXO31</i>   | chr16 | Body    | 0.87 | (0.63; 1.21) | 4.2E-01 |
| cg21385978 | <i>MBD5</i>     | chr2  | 5'UTR   | 1.21 | (0.77; 1.9)  | 4.2E-01 |
| cg18124517 | <i>TNFRSF1B</i> | chr1  | Body    | 1.19 | (0.78; 1.83) | 4.2E-01 |
| cg08116366 | <i>SMARCD3</i>  | chr7  | Body    | 1.23 | (0.75; 2.01) | 4.2E-01 |
| cg23287951 | <i>TNRC6B</i>   | chr22 | 5'UTR   | 1.16 | (0.81; 1.65) | 4.2E-01 |
| cg07951193 | <i>TNRC18</i>   | chr7  | Body    | 0.81 | (0.48; 1.36) | 4.2E-01 |
| cg14554371 | <i>PTPRN2</i>   | chr7  | Body    | 0.87 | (0.61; 1.23) | 4.2E-01 |
| cg10066623 | <i>RNU5E-1</i>  | chr5  | Body    | 0.86 | (0.6; 1.24)  | 4.2E-01 |
| cg07438751 | <i>TENM2</i>    | chr5  | Body    | 0.88 | (0.63; 1.21) | 4.2E-01 |
| cg09616189 | <i>CNTNAP2</i>  | chr7  | Body    | 0.87 | (0.63; 1.22) | 4.2E-01 |
| cg10929447 | <i>FBXO31</i>   | chr16 | Body    | 1.14 | (0.82; 1.59) | 4.2E-01 |
| cg10929447 | <i>FBXO31</i>   | chr16 | 5'UTR   | 1.14 | (0.82; 1.59) | 4.2E-01 |
| cg15540496 | <i>PTPRN2</i>   | chr7  | Body    | 0.88 | (0.64; 1.21) | 4.2E-01 |
| cg19852058 | <i>ALCAM</i>    | chr3  | 3'UTR   | 1.16 | (0.8; 1.69)  | 4.2E-01 |
| cg25469698 | <i>TXNDC9</i>   | chr2  | TSS1500 | 0.86 | (0.59; 1.25) | 4.2E-01 |
| cg09882452 | <i>RECQL5</i>   | chr17 | Body    | 1.16 | (0.81; 1.67) | 4.2E-01 |
| cg13013538 | <i>CHCHD6</i>   | chr3  | TSS1500 | 0.89 | (0.66; 1.19) | 4.2E-01 |
| cg11778545 | <i>TNFRSF19</i> | chr13 | Body    | 0.87 | (0.62; 1.22) | 4.2E-01 |
| cg14119861 | <i>CPEB1</i>    | chr15 | Body    | 1.14 | (0.83; 1.58) | 4.2E-01 |



|            |                     |       |         |      |              |         |
|------------|---------------------|-------|---------|------|--------------|---------|
| cg14119861 | <i>CPEB1</i>        | chr15 | 5'UTR   | 1.14 | (0.83; 1.58) | 4.2E-01 |
| cg15986542 | <i>CACNA1C</i>      | chr12 | Body    | 1.15 | (0.82; 1.62) | 4.2E-01 |
| cg00914222 | <i>PTPRU</i>        | chr1  | Body    | 0.88 | (0.65; 1.2)  | 4.2E-01 |
| cg17522601 | <i>CHFR</i>         | chr12 | Body    | 1.14 | (0.82; 1.59) | 4.2E-01 |
| cg09438943 | <i>TNFRSF11A</i>    | chr18 | Body    | 0.82 | (0.51; 1.33) | 4.2E-01 |
| cg19542090 | <i>PDE8A</i>        | chr15 | TSS1500 | 1.17 | (0.8; 1.72)  | 4.2E-01 |
| cg18894198 | <i>PTPRN2</i>       | chr7  | Body    | 1.14 | (0.83; 1.55) | 4.2E-01 |
| cg11697226 | <i>TNFRSF11A</i>    | chr18 | TSS200  | 1.17 | (0.8; 1.71)  | 4.2E-01 |
| cg17510502 | <i>PTPRN2</i>       | chr7  | Body    | 1.13 | (0.84; 1.52) | 4.2E-01 |
| cg25698236 | <i>MTNR1A</i>       | chr4  | Body    | 0.89 | (0.66; 1.19) | 4.2E-01 |
| cg07099481 | <i>AKAP13</i>       | chr15 | Body    | 1.28 | (0.7; 2.32)  | 4.2E-01 |
| cg10982015 | <i>RAP1B</i>        | chr12 | TSS200  | 1.2  | (0.76; 1.9)  | 4.2E-01 |
| cg24682385 | <i>CREBBP</i>       | chr16 | Body    | 0.86 | (0.59; 1.25) | 4.2E-01 |
| cg21628055 | <i>GNA12</i>        | chr7  | Body    | 0.87 | (0.62; 1.22) | 4.2E-01 |
| cg08827144 | <i>PTPRN2</i>       | chr7  | Body    | 1.14 | (0.83; 1.58) | 4.2E-01 |
| cg27004850 | <i>PTPRN2</i>       | chr7  | Body    | 1.17 | (0.79; 1.74) | 4.2E-01 |
| cg06097320 | <i>TNFRSF12A</i>    | chr16 | TSS200  | 1.12 | (0.85; 1.48) | 4.2E-01 |
| cg02818143 | <i>PTPRN2</i>       | chr7  | 3'UTR   | 0.87 | (0.63; 1.22) | 4.2E-01 |
| cg22267941 | <i>PDE8A</i>        | chr15 | TSS1500 | 1.14 | (0.82; 1.6)  | 4.3E-01 |
| cg09576209 | <i>CACNA1C</i>      | chr12 | Body    | 1.17 | (0.8; 1.7)   | 4.3E-01 |
| cg20745134 | <i>C11orf67</i>     | chr11 | 5'UTR   | 0.88 | (0.64; 1.21) | 4.3E-01 |
| cg22015449 | <i>CSMD2</i>        | chr1  | TSS1500 | 1.13 | (0.83; 1.55) | 4.3E-01 |
| cg18307677 | <i>PTPRN2</i>       | chr7  | Body    | 0.89 | (0.66; 1.19) | 4.3E-01 |
| cg12551582 | <i>CHFR</i>         | chr12 | TSS1500 | 0.88 | (0.65; 1.2)  | 4.3E-01 |
| cg18453904 | <i>ALCAM</i>        | chr3  | Body    | 0.88 | (0.65; 1.2)  | 4.3E-01 |
| cg09215952 | <i>TNRC6B</i>       | chr22 | Body    | 0.78 | (0.42; 1.45) | 4.3E-01 |
| cg02220008 | <i>PHACTR1</i>      | chr6  | Body    | 1.17 | (0.79; 1.74) | 4.3E-01 |
| cg05502759 | <i>CSMD2</i>        | chr1  | ExonBnd | 0.88 | (0.63; 1.21) | 4.3E-01 |
| cg05502759 | <i>CSMD2</i>        | chr1  | Body    | 0.88 | (0.63; 1.21) | 4.3E-01 |
| cg11664673 | <i>WAC</i>          | chr10 | Body    | 1.16 | (0.81; 1.67) | 4.3E-01 |
| cg16721194 | <i>CUX2</i>         | chr12 | Body    | 1.26 | (0.71; 2.23) | 4.3E-01 |
| cg11168006 | <i>HMGB4</i>        | chr1  | 5'UTR   | 1.14 | (0.82; 1.59) | 4.3E-01 |
| cg11168006 | <i>CSMD2</i>        | chr1  | Body    | 1.14 | (0.82; 1.59) | 4.3E-01 |
| cg10612850 | <i>TNRC6B</i>       | chr22 | Body    | 0.89 | (0.66; 1.19) | 4.3E-01 |
| cg17372101 | <i>CNTNAP2</i>      | chr7  | Body    | 0.86 | (0.6; 1.24)  | 4.3E-01 |
| cg26394825 | <i>CHFR</i>         | chr12 | TSS1500 | 0.87 | (0.62; 1.23) | 4.3E-01 |
| cg07538293 | <i>PTPRN2</i>       | chr7  | Body    | 0.87 | (0.63; 1.22) | 4.3E-01 |
| cg09892015 | <i>RTN4RL1</i>      | chr17 | Body    | 0.88 | (0.64; 1.21) | 4.3E-01 |
| cg04173714 | <i>AKAP13</i>       | chr15 | Body    | 0.88 | (0.64; 1.21) | 4.3E-01 |
| cg19036372 | <i>PTPRN2</i>       | chr7  | Body    | 0.87 | (0.62; 1.22) | 4.3E-01 |
| cg12406607 | <i>ELAVL4</i>       | chr1  | Body    | 0.88 | (0.64; 1.21) | 4.3E-01 |
| cg16796848 | <i>PTPRN2</i>       | chr7  | Body    | 0.88 | (0.65; 1.2)  | 4.3E-01 |
| cg04094148 | <i>BARX2</i>        | chr11 | TSS1500 | 0.88 | (0.64; 1.21) | 4.3E-01 |
| cg18288907 | <i>SCAF8</i>        | chr6  | Body    | 0.86 | (0.6; 1.24)  | 4.3E-01 |
| cg18122501 | <i>PTPRN2</i>       | chr7  | Body    | 1.14 | (0.83; 1.57) | 4.3E-01 |
| cg01935413 | <i>CDH13</i>        | chr16 | Body    | 1.15 | (0.81; 1.64) | 4.3E-01 |
| cg08518101 | <i>CDH13</i>        | chr16 | Body    | 0.86 | (0.59; 1.25) | 4.3E-01 |
| cg17171407 | <i>TNFRSF11B</i>    | chr8  | Body    | 1.12 | (0.84; 1.49) | 4.3E-01 |
| cg00118719 | <i>FBXO33</i>       | chr14 | 1stExon | 0.85 | (0.58; 1.26) | 4.3E-01 |
| cg06947694 | <i>TNRC18</i>       | chr7  | Body    | 1.15 | (0.82; 1.6)  | 4.3E-01 |
| cg15744368 | <i>TNRC6C</i>       | chr17 | 3'UTR   | 0.86 | (0.59; 1.25) | 4.3E-01 |
| cg03752513 | <i>LOC101929698</i> | chr20 | Body    | 1.21 | (0.76; 1.92) | 4.3E-01 |
| cg03752513 | <i>NOL4L</i>        | chr20 | Body    | 1.21 | (0.76; 1.92) | 4.3E-01 |
| cg10992339 | <i>ATP8A1</i>       | chr4  | Body    | 0.75 | (0.37; 1.52) | 4.3E-01 |
| cg21269738 | <i>CACNA1C</i>      | chr12 | Body    | 1.15 | (0.82; 1.62) | 4.3E-01 |
| cg16561057 | <i>PTPRN2</i>       | chr7  | Body    | 0.87 | (0.62; 1.22) | 4.3E-01 |
| cg23395034 | <i>ARID1A</i>       | chr1  | Body    | 0.87 | (0.61; 1.24) | 4.3E-01 |
| cg10530336 | <i>PTPRN2</i>       | chr7  | Body    | 0.88 | (0.65; 1.2)  | 4.3E-01 |
| cg00214250 | <i>PTPRN2</i>       | chr7  | Body    | 1.15 | (0.81; 1.63) | 4.3E-01 |
| cg14292168 | <i>CCDC80</i>       | chr3  | Body    | 0.87 | (0.61; 1.23) | 4.3E-01 |
| cg20579012 | <i>CACNA1C</i>      | chr12 | 3'UTR   | 1.15 | (0.82; 1.61) | 4.3E-01 |



|            |                  |       |         |      |              |         |
|------------|------------------|-------|---------|------|--------------|---------|
| cg07781364 | <i>NRXN1</i>     | chr2  | Body    | 1.17 | (0.79; 1.73) | 4.3E-01 |
| cg17496602 | <i>CREBBP</i>    | chr16 | Body    | 0.85 | (0.57; 1.27) | 4.3E-01 |
| cg15555217 | <i>CTDSPL</i>    | chr3  | Body    | 1.17 | (0.79; 1.73) | 4.3E-01 |
| cg03648054 | <i>WVOX</i>      | chr16 | Body    | 0.88 | (0.65; 1.2)  | 4.3E-01 |
| cg21279840 | <i>PTPRN2</i>    | chr7  | Body    | 1.16 | (0.81; 1.65) | 4.3E-01 |
| cg13909533 | <i>ELAVL4</i>    | chr1  | TSS1500 | 0.84 | (0.55; 1.29) | 4.3E-01 |
| cg13909533 | <i>ELAVL4</i>    | chr1  | Body    | 0.84 | (0.55; 1.29) | 4.3E-01 |
| cg19375767 | <i>ARID1A</i>    | chr1  | Body    | 0.86 | (0.59; 1.25) | 4.3E-01 |
| cg24576995 | <i>PTPRN2</i>    | chr7  | Body    | 0.87 | (0.62; 1.23) | 4.3E-01 |
| cg14430158 | <i>TENM2</i>     | chr5  | Body    | 1.15 | (0.81; 1.63) | 4.3E-01 |
| cg16722302 | <i>TNRC18</i>    | chr7  | 5'UTR   | 0.88 | (0.63; 1.22) | 4.3E-01 |
| cg16989378 | <i>FBXO36</i>    | chr2  | TSS1500 | 0.87 | (0.62; 1.22) | 4.3E-01 |
| cg02319318 | <i>ZNF704</i>    | chr8  | Body    | 1.14 | (0.82; 1.6)  | 4.3E-01 |
| cg22573528 | <i>NRXN1</i>     | chr2  | Body    | 1.18 | (0.78; 1.79) | 4.3E-01 |
| cg07912922 | <i>PHACTR1</i>   | chr6  | Body    | 0.87 | (0.62; 1.23) | 4.3E-01 |
| cg10374297 | <i>PTPRN2</i>    | chr7  | Body    | 1.15 | (0.81; 1.64) | 4.3E-01 |
| cg26507409 | <i>TNRC6B</i>    | chr22 | Body    | 1.18 | (0.78; 1.78) | 4.3E-01 |
| cg03448007 | <i>TNRC18</i>    | chr7  | Body    | 0.87 | (0.63; 1.22) | 4.3E-01 |
| cg10613546 | <i>PTPRN2</i>    | chr7  | Body    | 0.88 | (0.65; 1.2)  | 4.3E-01 |
| cg01608400 | <i>WVOX</i>      | chr16 | Body    | 1.15 | (0.81; 1.63) | 4.3E-01 |
| cg23352885 | <i>PTPRN2</i>    | chr7  | Body    | 0.88 | (0.64; 1.21) | 4.3E-01 |
| cg08492145 | <i>PTPRN2</i>    | chr7  | Body    | 1.13 | (0.83; 1.53) | 4.3E-01 |
| cg23888154 | <i>ATP8A1</i>    | chr4  | TSS200  | 1.13 | (0.83; 1.55) | 4.3E-01 |
| cg01496696 | <i>PTPRN2</i>    | chr7  | Body    | 1.13 | (0.83; 1.53) | 4.3E-01 |
| cg08840687 | <i>FSTL1</i>     | chr3  | 3'UTR   | 0.87 | (0.62; 1.23) | 4.3E-01 |
| cg12002159 | <i>TNFRSF1B</i>  | chr1  | 5'UTR   | 0.88 | (0.65; 1.21) | 4.3E-01 |
| cg12002159 | <i>TNFRSF1B</i>  | chr1  | 1stExon | 0.88 | (0.65; 1.21) | 4.3E-01 |
| cg10670187 | <i>DACH1</i>     | chr13 | Body    | 1.26 | (0.71; 2.26) | 4.3E-01 |
| cg26049853 | <i>CHCHD6</i>    | chr3  | Body    | 0.88 | (0.64; 1.21) | 4.3E-01 |
| cg00256785 | <i>CHFR</i>      | chr12 | TSS200  | 0.89 | (0.66; 1.2)  | 4.3E-01 |
| cg02324079 | <i>TNRC6A</i>    | chr16 | Body    | 0.78 | (0.42; 1.46) | 4.3E-01 |
| cg01963870 | <i>CREBBP</i>    | chr16 | Body    | 0.89 | (0.66; 1.19) | 4.3E-01 |
| cg17119612 | <i>ZNF704</i>    | chr8  | 5'UTR   | 1.13 | (0.83; 1.54) | 4.3E-01 |
| cg25300386 | <i>COL1A2</i>    | chr7  | 5'UTR   | 1.16 | (0.8; 1.68)  | 4.3E-01 |
| cg25300386 | <i>COL1A2</i>    | chr7  | 1stExon | 1.16 | (0.8; 1.68)  | 4.3E-01 |
| cg01262413 | <i>PTPRN2</i>    | chr7  | Body    | 0.86 | (0.59; 1.25) | 4.3E-01 |
| cg16628676 | <i>TNRC6B</i>    | chr22 | 3'UTR   | 1.31 | (0.66; 2.59) | 4.3E-01 |
| cg07624612 | <i>CPEB1</i>     | chr15 | Body    | 0.86 | (0.59; 1.26) | 4.3E-01 |
| cg17804850 | <i>TNFRSF11A</i> | chr18 | 3'UTR   | 0.89 | (0.66; 1.2)  | 4.3E-01 |
| cg26321153 | <i>PTPRN2</i>    | chr7  | Body    | 0.88 | (0.64; 1.21) | 4.3E-01 |
| cg21007371 | <i>UBE2E2</i>    | chr3  | TSS1500 | 1.22 | (0.74; 2.01) | 4.3E-01 |
| cg13408152 | <i>FSTL1</i>     | chr3  | TSS1500 | 1.19 | (0.77; 1.84) | 4.3E-01 |
| cg13533439 | <i>ZBTB20</i>    | chr3  | 5'UTR   | 1.15 | (0.81; 1.62) | 4.3E-01 |
| cg21399120 | <i>CDH13</i>     | chr16 | 5'UTR   | 1.14 | (0.82; 1.57) | 4.3E-01 |
| cg21399120 | <i>CDH13</i>     | chr16 | Body    | 1.14 | (0.82; 1.57) | 4.3E-01 |
| cg13608961 | <i>NRXN1</i>     | chr2  | Body    | 0.87 | (0.6; 1.24)  | 4.3E-01 |
| cg12143241 | <i>CACNA1C</i>   | chr12 | Body    | 1.14 | (0.82; 1.58) | 4.3E-01 |
| cg13174688 | <i>MTCL1</i>     | chr18 | Body    | 1.14 | (0.82; 1.59) | 4.3E-01 |
| cg25225521 | <i>PTPRN2</i>    | chr7  | Body    | 0.91 | (0.71; 1.16) | 4.3E-01 |
| cg03850711 | <i>HMGB4</i>     | chr1  | 3'UTR   | 1.12 | (0.84; 1.51) | 4.3E-01 |
| cg03850711 | <i>CSMD2</i>     | chr1  | Body    | 1.12 | (0.84; 1.51) | 4.3E-01 |
| cg20413923 | <i>ARID1A</i>    | chr1  | 5'UTR   | 0.86 | (0.58; 1.27) | 4.3E-01 |
| cg20413923 | <i>ARID1A</i>    | chr1  | 1stExon | 0.86 | (0.58; 1.27) | 4.3E-01 |
| cg12227258 | <i>ELAVL4</i>    | chr1  | TSS200  | 1.15 | (0.81; 1.62) | 4.4E-01 |
| cg12227258 | <i>ELAVL4</i>    | chr1  | Body    | 1.15 | (0.81; 1.62) | 4.4E-01 |
| cg00039662 | <i>ZBTB20</i>    | chr3  | 5'UTR   | 1.14 | (0.82; 1.58) | 4.4E-01 |
| cg25495685 | <i>SMARCD3</i>   | chr7  | TSS1500 | 0.86 | (0.59; 1.25) | 4.4E-01 |
| cg25495685 | <i>SMARCD3</i>   | chr7  | Body    | 0.86 | (0.59; 1.25) | 4.4E-01 |
| cg24095303 | <i>BARX2</i>     | chr11 | Body    | 0.88 | (0.65; 1.2)  | 4.4E-01 |
| cg11521318 | <i>TNRC6B</i>    | chr22 | Body    | 0.76 | (0.39; 1.5)  | 4.4E-01 |
| cg11521318 | <i>TNRC6B</i>    | chr22 | TSS1500 | 0.76 | (0.39; 1.5)  | 4.4E-01 |



|            |                  |       |         |      |              |         |
|------------|------------------|-------|---------|------|--------------|---------|
| cg11430766 | <i>NRXN1</i>     | chr2  | Body    | 1.15 | (0.81; 1.63) | 4.4E-01 |
| cg20389760 | <i>ATP8A1</i>    | chr4  | TSS1500 | 0.88 | (0.64; 1.21) | 4.4E-01 |
| cg04585221 | <i>PEX14</i>     | chr1  | Body    | 1.13 | (0.83; 1.54) | 4.4E-01 |
| cg22053687 | <i>WVOX</i>      | chr16 | Body    | 1.16 | (0.79; 1.71) | 4.4E-01 |
| cg21440084 | <i>CSMD2</i>     | chr1  | Body    | 0.89 | (0.67; 1.19) | 4.4E-01 |
| cg10714597 | <i>TNFRSF11A</i> | chr18 | TSS200  | 1.15 | (0.81; 1.62) | 4.4E-01 |
| cg06778662 | <i>PTPRN2</i>    | chr7  | Body    | 0.89 | (0.67; 1.19) | 4.4E-01 |
| cg07161024 | <i>WVOX</i>      | chr16 | Body    | 0.87 | (0.61; 1.24) | 4.4E-01 |
| cg01108637 | <i>PTPRN2</i>    | chr7  | Body    | 0.88 | (0.64; 1.21) | 4.4E-01 |
| cg13546321 | <i>CUX2</i>      | chr12 | Body    | 0.87 | (0.62; 1.23) | 4.4E-01 |
| cg10778837 | <i>CNTNAP2</i>   | chr7  | Body    | 1.13 | (0.83; 1.54) | 4.4E-01 |
| cg05502211 | <i>TNRC18</i>    | chr7  | Body    | 1.17 | (0.78; 1.75) | 4.4E-01 |
| cg20957774 | <i>PTPRN2</i>    | chr7  | Body    | 0.87 | (0.61; 1.24) | 4.4E-01 |
| cg12600265 | <i>TNRC18</i>    | chr7  | Body    | 0.83 | (0.52; 1.32) | 4.4E-01 |
| cg06927522 | <i>CNTNAP2</i>   | chr7  | Body    | 1.15 | (0.81; 1.65) | 4.4E-01 |
| cg11168904 | <i>ATP8A1</i>    | chr4  | Body    | 0.84 | (0.54; 1.3)  | 4.4E-01 |
| cg24804145 | <i>PTPRN2</i>    | chr7  | Body    | 0.88 | (0.64; 1.21) | 4.4E-01 |
| cg02507604 | <i>CHFR</i>      | chr12 | 3'UTR   | 1.14 | (0.82; 1.58) | 4.4E-01 |
| cg22011802 | <i>PTPRN2</i>    | chr7  | Body    | 0.86 | (0.59; 1.26) | 4.4E-01 |
| cg08104132 | <i>AKAP13</i>    | chr15 | Body    | 0.89 | (0.66; 1.19) | 4.4E-01 |
| cg05894355 | <i>ELAVL4</i>    | chr1  | TSS1500 | 0.86 | (0.6; 1.25)  | 4.4E-01 |
| cg05894355 | <i>ELAVL4</i>    | chr1  | Body    | 0.86 | (0.6; 1.25)  | 4.4E-01 |
| cg16064424 | <i>WVOX</i>      | chr16 | Body    | 0.87 | (0.61; 1.24) | 4.4E-01 |
| cg05742721 | <i>ZFP91</i>     | chr11 | Body    | 1.16 | (0.79; 1.7)  | 4.4E-01 |
| cg04792888 | <i>ATF7</i>      | chr12 | Body    | 0.86 | (0.59; 1.26) | 4.4E-01 |
| cg19069029 | <i>PHACTR1</i>   | chr6  | Body    | 0.86 | (0.58; 1.26) | 4.4E-01 |
| cg07159686 | <i>RTN4R</i>     | chr22 | Body    | 1.17 | (0.79; 1.73) | 4.4E-01 |
| cg12398261 | <i>PTPRN2</i>    | chr7  | Body    | 1.17 | (0.78; 1.76) | 4.4E-01 |
| cg11051417 | <i>TAOK3</i>     | chr12 | Body    | 1.13 | (0.83; 1.55) | 4.4E-01 |
| cg26895220 | <i>PDE8A</i>     | chr15 | 5'UTR   | 1.19 | (0.77; 1.85) | 4.4E-01 |
| cg26895220 | <i>PDE8A</i>     | chr15 | Body    | 1.19 | (0.77; 1.85) | 4.4E-01 |
| cg06478943 | <i>PDE8A</i>     | chr15 | Body    | 1.14 | (0.82; 1.57) | 4.4E-01 |
| cg01602001 | <i>CDH11</i>     | chr16 | 5'UTR   | 0.86 | (0.6; 1.25)  | 4.4E-01 |
| cg03527077 | <i>PTPRN2</i>    | chr7  | Body    | 1.13 | (0.83; 1.53) | 4.4E-01 |
| cg11752927 | <i>PTPRN2</i>    | chr7  | Body    | 1.12 | (0.83; 1.52) | 4.4E-01 |
| cg08497530 | <i>CDH13</i>     | chr16 | TSS200  | 0.86 | (0.58; 1.26) | 4.4E-01 |
| cg12163490 | <i>CDH11</i>     | chr16 | 5'UTR   | 1.21 | (0.74; 1.97) | 4.4E-01 |
| cg12163490 | <i>CDH11</i>     | chr16 | 1stExon | 1.21 | (0.74; 1.97) | 4.4E-01 |
| cg04595505 | <i>NRXN1</i>     | chr2  | Body    | 0.89 | (0.66; 1.2)  | 4.4E-01 |
| cg19465011 | <i>PTPRN2</i>    | chr7  | Body    | 0.89 | (0.65; 1.2)  | 4.4E-01 |
| cg16119643 | <i>UBE2E2</i>    | chr3  | Body    | 1.25 | (0.71; 2.2)  | 4.4E-01 |
| cg11725080 | <i>RTN4RL1</i>   | chr17 | Body    | 0.86 | (0.58; 1.26) | 4.4E-01 |
| cg14848482 | <i>CSMD2</i>     | chr1  | ExonBnd | 0.87 | (0.61; 1.24) | 4.4E-01 |
| cg14848482 | <i>CSMD2</i>     | chr1  | Body    | 0.87 | (0.61; 1.24) | 4.4E-01 |
| cg06329447 | <i>ELAVL4</i>    | chr1  | TSS1500 | 0.84 | (0.54; 1.31) | 4.4E-01 |
| cg06329447 | <i>ELAVL4</i>    | chr1  | Body    | 0.84 | (0.54; 1.31) | 4.4E-01 |
| cg08964948 | <i>CREBBP</i>    | chr16 | Body    | 1.15 | (0.8; 1.65)  | 4.4E-01 |
| cg05439204 | <i>PTPRN2</i>    | chr7  | Body    | 1.13 | (0.83; 1.53) | 4.4E-01 |
| cg02795249 | <i>CTDSPL</i>    | chr3  | Body    | 1.12 | (0.84; 1.49) | 4.4E-01 |
| cg05196076 | <i>FBXO31</i>    | chr16 | Body    | 1.13 | (0.83; 1.54) | 4.4E-01 |
| cg05890727 | <i>FBXO34</i>    | chr14 | 5'UTR   | 0.82 | (0.5; 1.36)  | 4.4E-01 |
| cg25949550 | <i>CNTNAP2</i>   | chr7  | Body    | 1.17 | (0.78; 1.75) | 4.4E-01 |
| cg11366233 | <i>AKAP13</i>    | chr15 | 5'UTR   | 0.87 | (0.6; 1.25)  | 4.4E-01 |
| cg22557523 | <i>TNFRSF12A</i> | chr16 | TSS1500 | 1.18 | (0.77; 1.8)  | 4.4E-01 |
| cg12335116 | <i>ZBTB20</i>    | chr3  | 5'UTR   | 0.88 | (0.63; 1.22) | 4.4E-01 |
| cg09263904 | <i>CTDSP2</i>    | chr12 | Body    | 1.16 | (0.79; 1.71) | 4.4E-01 |
| cg24533989 | <i>ATP8A1</i>    | chr4  | TSS1500 | 0.88 | (0.65; 1.21) | 4.4E-01 |
| cg13181164 | <i>MEIS2</i>     | chr15 | Body    | 1.13 | (0.83; 1.54) | 4.4E-01 |
| cg26426403 | <i>CDH13</i>     | chr16 | 5'UTR   | 0.86 | (0.58; 1.27) | 4.4E-01 |
| cg26426403 | <i>CDH13</i>     | chr16 | Body    | 0.86 | (0.58; 1.27) | 4.4E-01 |
| cg15889705 | <i>MTNR1A</i>    | chr4  | Body    | 1.13 | (0.82; 1.56) | 4.4E-01 |



|                |                     |       |         |      |              |         |
|----------------|---------------------|-------|---------|------|--------------|---------|
| cg16715436     | <i>MTCL1</i>        | chr18 | Body    | 0.87 | (0.62; 1.23) | 4.4E-01 |
| cg26401253     | <i>DCUN1D4</i>      | chr4  | Body    | 1.14 | (0.82; 1.58) | 4.4E-01 |
| cg14933881     | <i>AKAP13</i>       | chr15 | Body    | 0.88 | (0.62; 1.23) | 4.4E-01 |
| cg14933881     | <i>AKAP13</i>       | chr15 | 1stExon | 0.88 | (0.62; 1.23) | 4.4E-01 |
| cg16688980     | <i>FBXO31</i>       | chr16 | Body    | 0.88 | (0.65; 1.21) | 4.4E-01 |
| cg21045000     | <i>TAOK3</i>        | chr12 | TSS1500 | 0.89 | (0.66; 1.2)  | 4.4E-01 |
| cg00797346     | <i>MEIS2</i>        | chr15 | 5'UTR   | 0.87 | (0.6; 1.25)  | 4.4E-01 |
| cg00797346     | <i>MEIS2</i>        | chr15 | 1stExon | 0.87 | (0.6; 1.25)  | 4.4E-01 |
| cg00797346     | <i>MEIS2</i>        | chr15 | Body    | 0.87 | (0.6; 1.25)  | 4.4E-01 |
| cg00797346     | <i>MEIS2</i>        | chr15 | TSS1500 | 0.87 | (0.6; 1.25)  | 4.4E-01 |
| cg09833475     | <i>PTPRN2</i>       | chr7  | Body    | 1.14 | (0.81; 1.6)  | 4.4E-01 |
| cg22791535     | <i>ELAVL4</i>       | chr1  | 3'UTR   | 1.16 | (0.79; 1.72) | 4.4E-01 |
| cg26711230     | <i>ATF7IP</i>       | chr12 | TSS1500 | 0.88 | (0.65; 1.21) | 4.4E-01 |
| cg00128883     | <i>ATF7</i>         | chr12 | TSS1500 | 1.25 | (0.71; 2.19) | 4.4E-01 |
| cg00128883     | <i>ATF7</i>         | chr12 | TSS200  | 1.25 | (0.71; 2.19) | 4.4E-01 |
| cg23357811     | <i>DCUN1D4</i>      | chr4  | Body    | 0.87 | (0.62; 1.23) | 4.4E-01 |
| cg19495351     | <i>UNC80</i>        | chr2  | Body    | 1.14 | (0.81; 1.61) | 4.4E-01 |
| cg08936992     | <i>LOC101929698</i> | chr20 | Body    | 0.85 | (0.55; 1.3)  | 4.4E-01 |
| cg08936992     | <i>NOL4L</i>        | chr20 | Body    | 0.85 | (0.55; 1.3)  | 4.4E-01 |
| cg01903241     | <i>PTPRN2</i>       | chr7  | Body    | 0.89 | (0.65; 1.21) | 4.4E-01 |
| cg01145688     | <i>TNR</i>          | chr1  | Body    | 1.24 | (0.71; 2.17) | 4.4E-01 |
| cg15209988     | <i>TNFRSF10D</i>    | chr8  | TSS200  | 1.17 | (0.78; 1.74) | 4.4E-01 |
| cg18339519     | <i>ALCAM</i>        | chr3  | Body    | 1.12 | (0.84; 1.5)  | 4.5E-01 |
| cg11843948     | <i>TNRC18</i>       | chr7  | Body    | 0.87 | (0.62; 1.24) | 4.5E-01 |
| cg00760449     | <i>SUGCT</i>        | chr7  | Body    | 0.87 | (0.61; 1.25) | 4.5E-01 |
| cg03779374     | <i>ZBTB20</i>       | chr3  | TSS1500 | 0.86 | (0.59; 1.26) | 4.5E-01 |
| cg03779374     | <i>ZBTB20</i>       | chr3  | 5'UTR   | 0.86 | (0.59; 1.26) | 4.5E-01 |
| cg03779374     | <i>ZBTB20</i>       | chr3  | TSS200  | 0.86 | (0.59; 1.26) | 4.5E-01 |
| cg20519944     | <i>PTPRN2</i>       | chr7  | Body    | 0.88 | (0.63; 1.23) | 4.5E-01 |
| cg01099094     | <i>CSMD2</i>        | chr1  | Body    | 1.14 | (0.81; 1.6)  | 4.5E-01 |
| cg01139696     | <i>GNA12</i>        | chr7  | Body    | 1.12 | (0.83; 1.52) | 4.5E-01 |
| cg27318635     | <i>CREBBP</i>       | chr16 | Body    | 0.75 | (0.36; 1.56) | 4.5E-01 |
| cg09362918     | <i>CNTNAP2</i>      | chr7  | Body    | 0.88 | (0.64; 1.21) | 4.5E-01 |
| cg26651148     | <i>PTPRN2</i>       | chr7  | Body    | 0.87 | (0.62; 1.24) | 4.5E-01 |
| cg23898214     | <i>PHACTR1</i>      | chr6  | Body    | 1.31 | (0.65; 2.63) | 4.5E-01 |
| cg13443842     | <i>CACNA1C</i>      | chr12 | TSS1500 | 0.88 | (0.63; 1.23) | 4.5E-01 |
| ch.12.1224713F | <i>CTDSP2</i>       | chr12 | 3'UTR   | 0.88 | (0.62; 1.23) | 4.5E-01 |
| cg20195882     | <i>TDRP</i>         | chr8  | TSS1500 | 0.87 | (0.61; 1.25) | 4.5E-01 |
| cg25419384     | <i>TNFRSF1B</i>     | chr1  | Body    | 1.18 | (0.77; 1.83) | 4.5E-01 |
| cg17434510     | <i>TNRC6B</i>       | chr22 | Body    | 1.2  | (0.76; 1.89) | 4.5E-01 |
| cg09211763     | <i>COL5A2</i>       | chr2  | 1stExon | 0.87 | (0.6; 1.26)  | 4.5E-01 |
| cg09211763     | <i>COL5A2</i>       | chr2  | 5'UTR   | 0.87 | (0.6; 1.26)  | 4.5E-01 |
| cg15826644     | <i>FBXO36</i>       | chr2  | Body    | 0.89 | (0.67; 1.2)  | 4.5E-01 |
| cg22932804     | <i>ELAVL4</i>       | chr1  | TSS1500 | 0.89 | (0.66; 1.2)  | 4.5E-01 |
| cg09982294     | <i>MTCL1</i>        | chr18 | Body    | 1.13 | (0.82; 1.55) | 4.5E-01 |
| cg21143896     | <i>GNA12</i>        | chr7  | Body    | 1.13 | (0.82; 1.56) | 4.5E-01 |
| cg26079666     | <i>BRUNOL4</i>      | chr18 | Body    | 1.18 | (0.77; 1.79) | 4.5E-01 |
| cg02855558     | <i>PTPRN2</i>       | chr7  | Body    | 0.88 | (0.63; 1.23) | 4.5E-01 |
| cg02331348     | <i>PTPRN2</i>       | chr7  | Body    | 0.88 | (0.64; 1.22) | 4.5E-01 |
| cg20166534     | <i>TNFRSF10B</i>    | chr8  | Body    | 0.87 | (0.6; 1.25)  | 4.5E-01 |
| cg11148491     | <i>RTN4RL1</i>      | chr17 | Body    | 0.88 | (0.64; 1.22) | 4.5E-01 |
| cg10523996     | <i>CHCHD6</i>       | chr3  | 5'UTR   | 1.14 | (0.81; 1.62) | 4.5E-01 |
| cg10523996     | <i>CHCHD6</i>       | chr3  | 1stExon | 1.14 | (0.81; 1.62) | 4.5E-01 |
| cg12034641     | <i>FBXO34</i>       | chr14 | 5'UTR   | 0.76 | (0.38; 1.54) | 4.5E-01 |
| cg25165908     | <i>CUX2</i>         | chr12 | Body    | 0.86 | (0.59; 1.26) | 4.5E-01 |
| cg01704609     | <i>TNFRSF19</i>     | chr13 | Body    | 1.16 | (0.8; 1.68)  | 4.5E-01 |
| cg22519571     | <i>PTPRN2</i>       | chr7  | Body    | 0.87 | (0.61; 1.25) | 4.5E-01 |
| cg18564665     | <i>PHACTR1</i>      | chr6  | Body    | 0.87 | (0.6; 1.25)  | 4.5E-01 |
| cg06816102     | <i>PHACTR1</i>      | chr6  | Body    | 0.77 | (0.4; 1.5)   | 4.5E-01 |
| cg15252510     | <i>CSMD2</i>        | chr1  | Body    | 0.81 | (0.47; 1.4)  | 4.5E-01 |
| cg14897683     | <i>FBXO34</i>       | chr14 | 5'UTR   | 1.12 | (0.83; 1.51) | 4.5E-01 |



|            |          |       |         |      |              |         |
|------------|----------|-------|---------|------|--------------|---------|
| cg18742521 | TENM2    | chr5  | Body    | 1.15 | (0.8; 1.66)  | 4.5E-01 |
| cg09835801 | FBXO36   | chr2  | TSS1500 | 1.12 | (0.83; 1.52) | 4.5E-01 |
| cg15001936 | PTPRN2   | chr7  | Body    | 0.87 | (0.6; 1.26)  | 4.5E-01 |
| cg02366856 | MEIS2    | chr15 | Body    | 0.87 | (0.62; 1.24) | 4.5E-01 |
| cg07830167 | ACVR2A   | chr2  | Body    | 0.85 | (0.56; 1.29) | 4.5E-01 |
| cg24903589 | PTPRS    | chr19 | Body    | 1.2  | (0.75; 1.91) | 4.5E-01 |
| cg13466456 | PTPRU    | chr1  | Body    | 0.88 | (0.64; 1.22) | 4.5E-01 |
| cg10562732 | ALCAM    | chr3  | Body    | 1.17 | (0.78; 1.73) | 4.5E-01 |
| cg19369556 | CDH13    | chr16 | Body    | 1.15 | (0.8; 1.65)  | 4.5E-01 |
| cg27408456 | CACNA1C  | chr12 | Body    | 0.87 | (0.62; 1.24) | 4.5E-01 |
| cg04072177 | GNA12    | chr7  | Body    | 0.89 | (0.67; 1.2)  | 4.5E-01 |
| cg08844894 | TNFRSF1B | chr1  | TSS200  | 1.12 | (0.83; 1.51) | 4.5E-01 |
| cg14631706 | BRUNOL4  | chr18 | Body    | 1.14 | (0.81; 1.59) | 4.5E-01 |
| cg16291831 | PTPRN2   | chr7  | 3'UTR   | 0.88 | (0.63; 1.23) | 4.5E-01 |
| cg19383680 | PTPRN2   | chr7  | Body    | 0.9  | (0.68; 1.18) | 4.5E-01 |
| cg03339717 | PTPRN2   | chr7  | Body    | 0.89 | (0.65; 1.21) | 4.5E-01 |
| cg01247275 | TNRC6B   | chr22 | Body    | 0.86 | (0.58; 1.28) | 4.5E-01 |
| cg11523910 | ZBTB20   | chr3  | Body    | 1.14 | (0.81; 1.62) | 4.5E-01 |
| cg11523910 | ZBTB20   | chr3  | 5'UTR   | 1.14 | (0.81; 1.62) | 4.5E-01 |
| cg26764094 | TNRC6B   | chr22 | Body    | 1.13 | (0.82; 1.55) | 4.5E-01 |
| cg04807004 | CPEB1    | chr15 | Body    | 1.16 | (0.79; 1.69) | 4.5E-01 |
| cg04807004 | CPEB1    | chr15 | TSS200  | 1.16 | (0.79; 1.69) | 4.5E-01 |
| cg26389570 | RTN4RL1  | chr17 | Body    | 0.84 | (0.53; 1.33) | 4.5E-01 |
| cg26308704 | PTPRN2   | chr7  | Body    | 1.12 | (0.83; 1.52) | 4.5E-01 |
| cg27524602 | ERI3     | chr1  | TSS1500 | 0.88 | (0.64; 1.22) | 4.5E-01 |
| cg11602897 | CUX2     | chr12 | Body    | 0.87 | (0.6; 1.25)  | 4.5E-01 |
| cg27503970 | TXNDC9   | chr2  | TSS1500 | 1.12 | (0.83; 1.5)  | 4.5E-01 |
| cg05652666 | PTPRN2   | chr7  | Body    | 0.89 | (0.65; 1.22) | 4.5E-01 |
| cg16072969 | DDHD2    | chr8  | TSS1500 | 1.12 | (0.83; 1.51) | 4.5E-01 |
| cg26912910 | ZBTB20   | chr3  | Body    | 1.12 | (0.83; 1.53) | 4.5E-01 |
| cg26912910 | ZBTB20   | chr3  | 5'UTR   | 1.12 | (0.83; 1.53) | 4.5E-01 |
| cg22112443 | MEIS2    | chr15 | TSS1500 | 0.87 | (0.61; 1.24) | 4.5E-01 |
| cg26843035 | WAC      | chr10 | TSS200  | 0.89 | (0.65; 1.21) | 4.5E-01 |
| cg26843035 | WAC      | chr10 | TSS1500 | 0.89 | (0.65; 1.21) | 4.5E-01 |
| cg14847818 | ZBTB20   | chr3  | 5'UTR   | 1.13 | (0.82; 1.58) | 4.5E-01 |
| cg00028135 | ZBTB20   | chr3  | TSS1500 | 0.87 | (0.61; 1.25) | 4.5E-01 |
| cg00028135 | ZBTB20   | chr3  | 5'UTR   | 0.87 | (0.61; 1.25) | 4.5E-01 |
| cg00594252 | TNRC18   | chr7  | Body    | 1.16 | (0.78; 1.74) | 4.5E-01 |
| cg16919827 | AKAP13   | chr15 | Body    | 1.16 | (0.79; 1.7)  | 4.5E-01 |
| cg25667844 | WWOX     | chr16 | Body    | 0.89 | (0.65; 1.21) | 4.5E-01 |
| cg07111829 | RTN4RL2  | chr11 | TSS1500 | 0.83 | (0.51; 1.35) | 4.5E-01 |
| cg00317577 | CPEB1    | chr15 | Body    | 1.17 | (0.78; 1.74) | 4.5E-01 |
| cg19627964 | NRXN1    | chr2  | Body    | 0.88 | (0.62; 1.24) | 4.5E-01 |
| cg24197303 | PTPRN2   | chr7  | Body    | 0.87 | (0.61; 1.25) | 4.5E-01 |
| cg24247592 | AKAP13   | chr15 | Body    | 0.87 | (0.61; 1.24) | 4.5E-01 |
| cg07734471 | PTPRN2   | chr7  | Body    | 0.9  | (0.67; 1.19) | 4.5E-01 |
| cg21823080 | CNTNAP2  | chr7  | Body    | 1.12 | (0.84; 1.49) | 4.5E-01 |
| cg24685239 | ALCAM    | chr3  | Body    | 1.18 | (0.76; 1.84) | 4.6E-01 |
| cg10872126 | CTNND2   | chr5  | Body    | 0.88 | (0.63; 1.23) | 4.6E-01 |
| cg20153748 | MTCL1    | chr18 | Body    | 1.28 | (0.67; 2.48) | 4.6E-01 |
| cg05389266 | PTPRN2   | chr7  | Body    | 1.11 | (0.84; 1.48) | 4.6E-01 |
| cg00650953 | CNTNAP2  | chr7  | Body    | 0.87 | (0.62; 1.24) | 4.6E-01 |
| cg12027254 | TNRC6C   | chr17 | Body    | 1.16 | (0.78; 1.72) | 4.6E-01 |
| cg02424630 | TAOK3    | chr12 | 5'UTR   | 1.13 | (0.82; 1.58) | 4.6E-01 |
| cg02424630 | TAOK3    | chr12 | 1stExon | 1.13 | (0.82; 1.58) | 4.6E-01 |
| cg10083178 | ACVR2A   | chr2  | TSS1500 | 0.89 | (0.64; 1.22) | 4.6E-01 |
| cg14582691 | PTPRN2   | chr7  | Body    | 1.14 | (0.81; 1.59) | 4.6E-01 |
| cg27185838 | SMARCD3  | chr7  | 5'UTR   | 1.13 | (0.82; 1.55) | 4.6E-01 |
| cg06505529 | CTDSPL   | chr3  | Body    | 1.28 | (0.67; 2.43) | 4.6E-01 |
| cg07366670 | CUX2     | chr12 | Body    | 1.19 | (0.75; 1.89) | 4.6E-01 |
| cg01427460 | DACH1    | chr13 | Body    | 1.19 | (0.75; 1.9)  | 4.6E-01 |



|            |                     |       |         |      |              |         |
|------------|---------------------|-------|---------|------|--------------|---------|
| cg22158547 | <i>SUSD4</i>        | chr1  | Body    | 1.14 | (0.81; 1.6)  | 4.6E-01 |
| cg10024240 | <i>ZNF704</i>       | chr8  | Body    | 0.88 | (0.62; 1.24) | 4.6E-01 |
| cg02980765 | <i>ATF7</i>         | chr12 | Body    | 1.3  | (0.65; 2.58) | 4.6E-01 |
| cg00493238 | <i>DCUN1D4</i>      | chr4  | Body    | 0.86 | (0.57; 1.29) | 4.6E-01 |
| cg09024808 | <i>TNRC6A</i>       | chr16 | Body    | 1.14 | (0.81; 1.61) | 4.6E-01 |
| cg25816115 | <i>CSMD2</i>        | chr1  | Body    | 1.16 | (0.79; 1.7)  | 4.6E-01 |
| cg17486458 | <i>PTPRN2</i>       | chr7  | Body    | 1.14 | (0.8; 1.62)  | 4.6E-01 |
| cg20108695 | <i>CUX2</i>         | chr12 | Body    | 0.87 | (0.61; 1.25) | 4.6E-01 |
| cg23639257 | <i>RECQL5</i>       | chr17 | TSS200  | 0.87 | (0.61; 1.25) | 4.6E-01 |
| cg00946316 | <i>PTPRN2</i>       | chr7  | Body    | 0.88 | (0.64; 1.22) | 4.6E-01 |
| cg26227005 | <i>ELAVL4</i>       | chr1  | TSS200  | 0.79 | (0.43; 1.47) | 4.6E-01 |
| cg26227005 | <i>ELAVL4</i>       | chr1  | Body    | 0.79 | (0.43; 1.47) | 4.6E-01 |
| cg00384653 | <i>RTN4R</i>        | chr22 | Body    | 1.14 | (0.81; 1.61) | 4.6E-01 |
| cg15836414 | <i>NRXN1</i>        | chr2  | Body    | 0.87 | (0.6; 1.26)  | 4.6E-01 |
| cg05255531 | <i>ELAVL4</i>       | chr1  | ExonBnd | 1.13 | (0.81; 1.58) | 4.6E-01 |
| cg05255531 | <i>ELAVL4</i>       | chr1  | Body    | 1.13 | (0.81; 1.58) | 4.6E-01 |
| cg23364632 | <i>PHACTR1</i>      | chr6  | Body    | 0.88 | (0.62; 1.24) | 4.6E-01 |
| cg09391993 | <i>CTDSP2</i>       | chr12 | ExonBnd | 0.89 | (0.65; 1.21) | 4.6E-01 |
| cg09391993 | <i>CTDSP2</i>       | chr12 | Body    | 0.89 | (0.65; 1.21) | 4.6E-01 |
| cg13182233 | <i>ALCAM</i>        | chr3  | Body    | 1.12 | (0.84; 1.49) | 4.6E-01 |
| cg26388970 | <i>WWOX</i>         | chr16 | Body    | 1.18 | (0.76; 1.82) | 4.6E-01 |
| cg20388206 | <i>NOL4</i>         | chr18 | Body    | 1.13 | (0.81; 1.58) | 4.6E-01 |
| cg20388206 | <i>NOL4</i>         | chr18 | TSS200  | 1.13 | (0.81; 1.58) | 4.6E-01 |
| cg18008037 | <i>PTPRN2</i>       | chr7  | Body    | 0.89 | (0.65; 1.22) | 4.6E-01 |
| cg18778733 | <i>ERI3</i>         | chr1  | Body    | 1.11 | (0.84; 1.47) | 4.6E-01 |
| cg18778733 | <i>ERI3</i>         | chr1  | 5'UTR   | 1.11 | (0.84; 1.47) | 4.6E-01 |
| cg04087039 | <i>PTPRN2</i>       | chr7  | Body    | 1.13 | (0.82; 1.56) | 4.6E-01 |
| cg16536341 | <i>CPEB1</i>        | chr15 | Body    | 1.17 | (0.78; 1.75) | 4.6E-01 |
| cg16536341 | <i>CPEB1</i>        | chr15 | TSS200  | 1.17 | (0.78; 1.75) | 4.6E-01 |
| cg16536341 | <i>CPEB1</i>        | chr15 | 5'UTR   | 1.17 | (0.78; 1.75) | 4.6E-01 |
| cg19550533 | <i>RTN4RL1</i>      | chr17 | Body    | 1.16 | (0.78; 1.72) | 4.6E-01 |
| cg09466887 | <i>MEIS2</i>        | chr15 | Body    | 0.86 | (0.59; 1.27) | 4.6E-01 |
| cg08880833 | <i>ATP6V0C</i>      | chr16 | TSS1500 | 0.9  | (0.67; 1.2)  | 4.6E-01 |
| cg08880833 | <i>ATP6V0C</i>      | chr16 | TSS200  | 0.9  | (0.67; 1.2)  | 4.6E-01 |
| cg23858094 | <i>NOL4</i>         | chr18 | 5'UTR   | 1.14 | (0.8; 1.63)  | 4.6E-01 |
| cg23858094 | <i>NOL4</i>         | chr18 | Body    | 1.14 | (0.8; 1.63)  | 4.6E-01 |
| cg21589431 | <i>PDE8A</i>        | chr15 | Body    | 1.21 | (0.73; 2)    | 4.6E-01 |
| cg19818512 | <i>WAC</i>          | chr10 | Body    | 0.88 | (0.63; 1.24) | 4.6E-01 |
| cg03455225 | <i>UBE2E2</i>       | chr3  | Body    | 0.88 | (0.63; 1.24) | 4.6E-01 |
| cg12902896 | <i>CTDSPL</i>       | chr3  | Body    | 0.87 | (0.59; 1.27) | 4.6E-01 |
| cg09162158 | <i>SMARCD3</i>      | chr7  | TSS200  | 1.11 | (0.84; 1.48) | 4.6E-01 |
| cg09162158 | <i>SMARCD3</i>      | chr7  | Body    | 1.11 | (0.84; 1.48) | 4.6E-01 |
| cg10430883 | <i>WWOX</i>         | chr16 | Body    | 1.15 | (0.79; 1.67) | 4.6E-01 |
| cg06345574 | <i>PTPRN2</i>       | chr7  | Body    | 1.23 | (0.71; 2.11) | 4.6E-01 |
| cg00267078 | <i>PTPRN2</i>       | chr7  | Body    | 0.88 | (0.64; 1.23) | 4.6E-01 |
| cg22163752 | <i>TNRC6B</i>       | chr22 | 5'UTR   | 0.87 | (0.6; 1.26)  | 4.6E-01 |
| cg19589728 | <i>PTPRN2</i>       | chr7  | Body    | 0.88 | (0.64; 1.23) | 4.6E-01 |
| cg00214171 | <i>LOC100130933</i> | chr17 | 5'UTR   | 1.18 | (0.76; 1.82) | 4.6E-01 |
| cg00214171 | <i>RECQL5</i>       | chr17 | Body    | 1.18 | (0.76; 1.82) | 4.6E-01 |
| cg26931601 | <i>SGIP1</i>        | chr1  | Body    | 0.75 | (0.35; 1.61) | 4.6E-01 |
| cg06813122 | <i>CACNA1C</i>      | chr12 | Body    | 1.12 | (0.83; 1.52) | 4.6E-01 |
| cg01973778 | <i>CDH13</i>        | chr16 | Body    | 0.88 | (0.62; 1.24) | 4.6E-01 |
| cg12439789 | <i>WAC</i>          | chr10 | TSS1500 | 0.88 | (0.61; 1.25) | 4.6E-01 |
| cg24558425 | <i>CSMD2</i>        | chr1  | TSS200  | 0.88 | (0.61; 1.25) | 4.6E-01 |
| cg27052402 | <i>DDHD2</i>        | chr8  | TSS1500 | 1.12 | (0.83; 1.51) | 4.6E-01 |
| cg27052402 | <i>DDHD2</i>        | chr8  | TSS200  | 1.12 | (0.83; 1.51) | 4.6E-01 |
| cg21329416 | <i>ARID1A</i>       | chr1  | Body    | 1.15 | (0.79; 1.66) | 4.6E-01 |
| cg13696531 | <i>PTPRN2</i>       | chr7  | Body    | 1.13 | (0.81; 1.58) | 4.6E-01 |
| cg19854301 | <i>CDH13</i>        | chr16 | Body    | 1.14 | (0.81; 1.6)  | 4.6E-01 |
| cg21413557 | <i>RTN4R</i>        | chr22 | TSS200  | 1.15 | (0.79; 1.69) | 4.6E-01 |
| cg17387069 | <i>PTPRN2</i>       | chr7  | Body    | 0.89 | (0.64; 1.22) | 4.6E-01 |



|            |                  |       |         |      |              |         |
|------------|------------------|-------|---------|------|--------------|---------|
| cg11797904 | <i>CTNND2</i>    | chr5  | Body    | 0.88 | (0.62; 1.25) | 4.6E-01 |
| cg11797904 | <i>CTNND2</i>    | chr5  | 5'UTR   | 0.88 | (0.62; 1.25) | 4.6E-01 |
| cg00795125 | <i>TNRC18</i>    | chr7  | Body    | 0.88 | (0.63; 1.23) | 4.6E-01 |
| cg00572487 | <i>TNFRSF12A</i> | chr16 | TSS1500 | 0.85 | (0.54; 1.32) | 4.6E-01 |
| cg17550268 | <i>ALCAM</i>     | chr3  | TSS200  | 0.89 | (0.66; 1.21) | 4.6E-01 |
| cg03362667 | <i>AKAP13</i>    | chr15 | 5'UTR   | 0.88 | (0.63; 1.24) | 4.6E-01 |
| cg08377331 | <i>GNA12</i>     | chr7  | Body    | 0.88 | (0.63; 1.24) | 4.6E-01 |
| cg23113069 | <i>ARID1A</i>    | chr1  | Body    | 0.88 | (0.62; 1.24) | 4.6E-01 |
| cg06150821 | <i>GNA12</i>     | chr7  | Body    | 1.12 | (0.82; 1.54) | 4.6E-01 |
| cg06150821 | <i>GNA12</i>     | chr7  | TSS200  | 1.12 | (0.82; 1.54) | 4.6E-01 |
| cg21178202 | <i>AKAP13</i>    | chr15 | 5'UTR   | 1.14 | (0.8; 1.64)  | 4.6E-01 |
| cg23676269 | <i>TNRC18</i>    | chr7  | Body    | 1.13 | (0.82; 1.55) | 4.6E-01 |
| cg03660606 | <i>PTPRN2</i>    | chr7  | Body    | 0.87 | (0.61; 1.25) | 4.6E-01 |
| cg03511031 | <i>PTPRN2</i>    | chr7  | Body    | 0.89 | (0.65; 1.22) | 4.6E-01 |
| cg07167098 | <i>RECQL</i>     | chr12 | TSS200  | 0.89 | (0.64; 1.22) | 4.6E-01 |
| cg07167098 | <i>GOLT1B</i>    | chr12 | TSS200  | 0.89 | (0.64; 1.22) | 4.6E-01 |
| cg00056280 | <i>GNA12</i>     | chr7  | Body    | 0.9  | (0.68; 1.19) | 4.7E-01 |
| cg00056280 | <i>GNA12</i>     | chr7  | TSS200  | 0.9  | (0.68; 1.19) | 4.7E-01 |
| cg09415485 | <i>CDH13</i>     | chr16 | Body    | 1.12 | (0.82; 1.53) | 4.7E-01 |
| cg08506924 | <i>CREBBP</i>    | chr16 | TSS1500 | 1.18 | (0.76; 1.85) | 4.7E-01 |
| cg04422991 | <i>FBXO33</i>    | chr14 | Body    | 1.14 | (0.81; 1.6)  | 4.7E-01 |
| cg06313349 | <i>PTPRN2</i>    | chr7  | Body    | 0.89 | (0.65; 1.22) | 4.7E-01 |
| cg04311994 | <i>PTPRS</i>     | chr19 | Body    | 1.16 | (0.78; 1.72) | 4.7E-01 |
| cg04891803 | <i>ARID1A</i>    | chr1  | Body    | 0.88 | (0.61; 1.25) | 4.7E-01 |
| cg01558746 | <i>TNRC18</i>    | chr7  | Body    | 1.14 | (0.81; 1.6)  | 4.7E-01 |
| cg25928850 | <i>CSMD2</i>     | chr1  | Body    | 0.88 | (0.64; 1.23) | 4.7E-01 |
| cg24503966 | <i>NOL4</i>      | chr18 | TSS1500 | 0.82 | (0.48; 1.4)  | 4.7E-01 |
| cg24503966 | <i>NOL4</i>      | chr18 | TSS200  | 0.82 | (0.48; 1.4)  | 4.7E-01 |
| cg10528826 | <i>PTPRN2</i>    | chr7  | Body    | 0.91 | (0.71; 1.17) | 4.7E-01 |
| cg23053240 | <i>MTCL1</i>     | chr18 | 3'UTR   | 0.89 | (0.66; 1.21) | 4.7E-01 |
| cg24610790 | <i>GNA12</i>     | chr7  | Body    | 0.87 | (0.6; 1.26)  | 4.7E-01 |
| cg06562578 | <i>MBD5</i>      | chr2  | TSS200  | 0.89 | (0.66; 1.21) | 4.7E-01 |
| cg06562578 | <i>ORC4</i>      | chr2  | TSS200  | 0.89 | (0.66; 1.21) | 4.7E-01 |
| cg06562578 | <i>ORC4</i>      | chr2  | 5'UTR   | 0.89 | (0.66; 1.21) | 4.7E-01 |
| cg03784302 | <i>PTPRN2</i>    | chr7  | Body    | 1.14 | (0.8; 1.64)  | 4.7E-01 |
| cg16520955 | <i>AKAP13</i>    | chr15 | TSS1500 | 0.87 | (0.61; 1.26) | 4.7E-01 |
| cg21571594 | <i>TNRC6C</i>    | chr17 | TSS1500 | 0.89 | (0.65; 1.22) | 4.7E-01 |
| cg16688681 | <i>GNA12</i>     | chr7  | Body    | 0.89 | (0.66; 1.21) | 4.7E-01 |
| cg05983758 | <i>PDE8A</i>     | chr15 | Body    | 0.89 | (0.65; 1.22) | 4.7E-01 |
| cg20888184 | <i>PTPRN2</i>    | chr7  | Body    | 0.88 | (0.63; 1.24) | 4.7E-01 |
| cg16051561 | <i>CTNND2</i>    | chr5  | Body    | 0.88 | (0.62; 1.25) | 4.7E-01 |
| cg16000683 | <i>CSMD2</i>     | chr1  | Body    | 1.19 | (0.74; 1.93) | 4.7E-01 |
| cg03938187 | <i>FBXO11</i>    | chr2  | Body    | 0.89 | (0.66; 1.21) | 4.7E-01 |
| cg03417681 | <i>RTN4RL1</i>   | chr17 | Body    | 1.21 | (0.73; 2.01) | 4.7E-01 |
| cg10454937 | <i>BARX1</i>     | chr9  | Body    | 1.12 | (0.82; 1.54) | 4.7E-01 |
| cg20422160 | <i>PHACTR1</i>   | chr6  | Body    | 1.28 | (0.66; 2.47) | 4.7E-01 |
| cg19450817 | <i>TENM2</i>     | chr5  | Body    | 0.85 | (0.55; 1.31) | 4.7E-01 |
| cg03119442 | <i>WWOX</i>      | chr16 | Body    | 0.89 | (0.65; 1.22) | 4.7E-01 |
| cg07132650 | <i>CDH13</i>     | chr16 | Body    | 1.15 | (0.79; 1.68) | 4.7E-01 |
| cg16784781 | <i>TNR</i>       | chr1  | 5'UTR   | 0.89 | (0.66; 1.21) | 4.7E-01 |
| cg15736062 | <i>PTPRN2</i>    | chr7  | Body    | 1.13 | (0.81; 1.58) | 4.7E-01 |
| cg01750200 | <i>CDH13</i>     | chr16 | Body    | 1.14 | (0.8; 1.64)  | 4.7E-01 |
| cg01072588 | <i>ERI3</i>      | chr1  | Body    | 0.88 | (0.63; 1.23) | 4.7E-01 |
| cg27579805 | <i>TNRC6C</i>    | chr17 | 3'UTR   | 1.16 | (0.77; 1.74) | 4.7E-01 |
| cg12282391 | <i>CACNA1C</i>   | chr12 | 5'UTR   | 1.13 | (0.81; 1.57) | 4.7E-01 |
| cg12282391 | <i>CACNA1C</i>   | chr12 | 1stExon | 1.13 | (0.81; 1.57) | 4.7E-01 |
| cg19542445 | <i>CACNA1C</i>   | chr12 | Body    | 0.86 | (0.57; 1.3)  | 4.7E-01 |
| cg09427131 | <i>AKAP13</i>    | chr15 | Body    | 0.89 | (0.65; 1.22) | 4.7E-01 |
| cg09427131 | <i>AKAP13</i>    | chr15 | TSS1500 | 0.89 | (0.65; 1.22) | 4.7E-01 |
| cg16670736 | <i>PTPRN2</i>    | chr7  | Body    | 1.13 | (0.81; 1.57) | 4.7E-01 |
| cg20181323 | <i>PTPRN2</i>    | chr7  | Body    | 1.13 | (0.82; 1.56) | 4.7E-01 |



|            |           |       |         |      |              |         |
|------------|-----------|-------|---------|------|--------------|---------|
| cg23383111 | DMXL2     | chr15 | Body    | 0.89 | (0.64; 1.23) | 4.7E-01 |
| cg17157422 | CACNA1C   | chr12 | Body    | 0.89 | (0.64; 1.23) | 4.7E-01 |
| cg14189678 | PTPRN2    | chr7  | Body    | 0.89 | (0.64; 1.23) | 4.7E-01 |
| cg15705714 | CSMD2     | chr1  | Body    | 0.89 | (0.64; 1.23) | 4.7E-01 |
| cg15286032 | PTPRN2    | chr7  | Body    | 1.12 | (0.82; 1.52) | 4.7E-01 |
| cg20789821 | CNTNAP2   | chr7  | Body    | 0.86 | (0.58; 1.28) | 4.7E-01 |
| cg02216795 | PHACTR1   | chr6  | Body    | 0.87 | (0.6; 1.27)  | 4.7E-01 |
| cg04826831 | FBXO31    | chr16 | Body    | 1.12 | (0.82; 1.54) | 4.7E-01 |
| cg08352905 | CSMD2     | chr1  | Body    | 1.13 | (0.81; 1.6)  | 4.7E-01 |
| cg16126393 | MEX3A     | chr1  | Body    | 1.15 | (0.78; 1.7)  | 4.7E-01 |
| cg13165174 | FBXO38    | chr5  | Body    | 0.88 | (0.61; 1.26) | 4.7E-01 |
| cg03461725 | PDE8A     | chr15 | TSS200  | 1.12 | (0.82; 1.52) | 4.7E-01 |
| cg13451048 | ERI3      | chr1  | Body    | 0.85 | (0.55; 1.32) | 4.7E-01 |
| cg00644629 | PTPRU     | chr1  | Body    | 1.13 | (0.81; 1.59) | 4.7E-01 |
| cg04290826 | PTPRN2    | chr7  | Body    | 0.89 | (0.64; 1.23) | 4.7E-01 |
| cg09933021 | FBXO11    | chr2  | Body    | 0.86 | (0.56; 1.31) | 4.7E-01 |
| cg01911127 | CACNA1C   | chr12 | Body    | 0.84 | (0.52; 1.36) | 4.7E-01 |
| cg15654121 | CSMD2     | chr1  | Body    | 1.14 | (0.8; 1.62)  | 4.7E-01 |
| cg21177426 | MEIS2     | chr15 | Body    | 0.85 | (0.55; 1.32) | 4.7E-01 |
| cg10845249 | SLC16A9   | chr10 | TSS1500 | 0.87 | (0.59; 1.28) | 4.7E-01 |
| cg16441262 | AKAP13    | chr15 | Body    | 1.2  | (0.73; 1.96) | 4.7E-01 |
| cg05733361 | PDE8A     | chr15 | TSS1500 | 1.17 | (0.76; 1.81) | 4.7E-01 |
| cg01207666 | COL1A2    | chr7  | Body    | 1.18 | (0.75; 1.84) | 4.7E-01 |
| cg03362700 | DCUN1D4   | chr4  | TSS200  | 0.87 | (0.59; 1.27) | 4.7E-01 |
| cg03362700 | DCUN1D4   | chr4  | TSS1500 | 0.87 | (0.59; 1.27) | 4.7E-01 |
| cg05514713 | PHACTR1   | chr6  | Body    | 1.18 | (0.75; 1.88) | 4.7E-01 |
| cg13020533 | ATF7      | chr12 | Body    | 1.13 | (0.81; 1.56) | 4.7E-01 |
| cg26293776 | NOL4L     | chr20 | Body    | 1.15 | (0.79; 1.67) | 4.7E-01 |
| cg02290262 | TNFRSF1B  | chr1  | Body    | 0.87 | (0.59; 1.27) | 4.7E-01 |
| cg09598596 | PTPRN2    | chr7  | Body    | 0.89 | (0.64; 1.23) | 4.7E-01 |
| cg00200563 | FBXO38    | chr5  | 5'UTR   | 1.14 | (0.8; 1.62)  | 4.7E-01 |
| cg03653377 | PTPRN2    | chr7  | Body    | 0.86 | (0.58; 1.29) | 4.7E-01 |
| cg06912420 | ATF7IP    | chr12 | Body    | 1.14 | (0.8; 1.63)  | 4.7E-01 |
| cg18219432 | PTPRN2    | chr7  | Body    | 0.89 | (0.65; 1.22) | 4.7E-01 |
| cg18328837 | TSHZ3     | chr19 | Body    | 1.13 | (0.81; 1.59) | 4.7E-01 |
| cg09109133 | CDH13     | chr16 | Body    | 1.16 | (0.77; 1.74) | 4.7E-01 |
| cg13442567 | PTPRN2    | chr7  | Body    | 1.12 | (0.82; 1.54) | 4.7E-01 |
| cg03320208 | TENM2     | chr5  | Body    | 0.83 | (0.5; 1.37)  | 4.7E-01 |
| cg11237495 | CTDSPL    | chr3  | Body    | 0.89 | (0.64; 1.23) | 4.7E-01 |
| cg21272363 | CNTNAP2   | chr7  | Body    | 1.13 | (0.81; 1.58) | 4.7E-01 |
| cg07152024 | RNU5E-1   | chr5  | Body    | 1.14 | (0.8; 1.62)  | 4.7E-01 |
| cg19577395 | PTPRS     | chr19 | 5'UTR   | 1.13 | (0.81; 1.57) | 4.7E-01 |
| cg16198723 | CCDC80    | chr3  | 5'UTR   | 0.86 | (0.57; 1.3)  | 4.7E-01 |
| cg16198723 | CCDC80    | chr3  | 1stExon | 0.86 | (0.57; 1.3)  | 4.7E-01 |
| cg12205822 | CACNA1C   | chr12 | Body    | 0.92 | (0.74; 1.15) | 4.7E-01 |
| cg14918744 | TNFRSF10D | chr8  | Body    | 0.76 | (0.36; 1.62) | 4.7E-01 |
| cg22954438 | UBE2E2    | chr3  | Body    | 0.9  | (0.66; 1.21) | 4.7E-01 |
| cg20284283 | WWOX      | chr16 | Body    | 0.88 | (0.61; 1.26) | 4.7E-01 |
| cg03211189 | RECQL5    | chr17 | Body    | 0.87 | (0.6; 1.27)  | 4.7E-01 |
| cg18843803 | TSHZ3     | chr19 | Body    | 1.13 | (0.81; 1.56) | 4.7E-01 |
| cg12099677 | ZBTB20    | chr3  | Body    | 1.13 | (0.81; 1.56) | 4.7E-01 |
| cg12099677 | ZBTB20    | chr3  | 5'UTR   | 1.13 | (0.81; 1.56) | 4.7E-01 |
| cg01801491 | NRXN1     | chr2  | Body    | 1.15 | (0.78; 1.71) | 4.7E-01 |
| cg12386061 | CTDSPL    | chr3  | Body    | 0.88 | (0.63; 1.24) | 4.7E-01 |
| cg12815354 | CSMD2     | chr1  | Body    | 1.15 | (0.78; 1.71) | 4.8E-01 |
| cg04404543 | ATF7      | chr12 | 5'UTR   | 1.12 | (0.82; 1.54) | 4.8E-01 |
| cg01329577 | PTPRN2    | chr7  | Body    | 1.16 | (0.78; 1.72) | 4.8E-01 |
| cg15391057 | CTDSPL    | chr3  | ExonBnd | 0.77 | (0.38; 1.57) | 4.8E-01 |
| cg15391057 | CTDSPL    | chr3  | Body    | 0.77 | (0.38; 1.57) | 4.8E-01 |
| cg07132515 | TNFRSF10B | chr8  | Body    | 1.26 | (0.66; 2.41) | 4.8E-01 |
| cg00516639 | SMARCD3   | chr7  | Body    | 0.87 | (0.59; 1.28) | 4.8E-01 |



|            |                     |       |         |      |              |         |
|------------|---------------------|-------|---------|------|--------------|---------|
| cg06591777 | <i>ATF7IP2</i>      | chr16 | Body    | 0.87 | (0.6; 1.27)  | 4.8E-01 |
| cg23542533 | <i>CHCHD6</i>       | chr3  | Body    | 1.15 | (0.79; 1.67) | 4.8E-01 |
| cg01224451 | <i>PTPRN2</i>       | chr7  | Body    | 1.11 | (0.83; 1.49) | 4.8E-01 |
| cg05818532 | <i>TNRC18</i>       | chr7  | Body    | 0.89 | (0.64; 1.23) | 4.8E-01 |
| cg17857260 | <i>AKAP13</i>       | chr15 | 5'UTR   | 0.81 | (0.46; 1.43) | 4.8E-01 |
| cg07631341 | <i>PDE8A</i>        | chr15 | 5'UTR   | 0.89 | (0.66; 1.22) | 4.8E-01 |
| cg07631341 | <i>PDE8A</i>        | chr15 | TSS1500 | 0.89 | (0.66; 1.22) | 4.8E-01 |
| cg05649922 | <i>ARID1A</i>       | chr1  | Body    | 1.19 | (0.74; 1.92) | 4.8E-01 |
| cg00506482 | <i>CACNA1C</i>      | chr12 | Body    | 1.13 | (0.8; 1.6)   | 4.8E-01 |
| cg02123936 | <i>WAC</i>          | chr10 | TSS1500 | 1.13 | (0.8; 1.6)   | 4.8E-01 |
| cg02123936 | <i>WAC</i>          | chr10 | Body    | 1.13 | (0.8; 1.6)   | 4.8E-01 |
| cg02054457 | <i>TNR</i>          | chr1  | 5'UTR   | 1.11 | (0.83; 1.49) | 4.8E-01 |
| cg25683489 | <i>TNFRSF19</i>     | chr13 | Body    | 0.89 | (0.64; 1.24) | 4.8E-01 |
| cg03906697 | <i>TNRC18</i>       | chr7  | Body    | 1.12 | (0.82; 1.54) | 4.8E-01 |
| cg07185854 | <i>CDH11</i>        | chr16 | 5'UTR   | 0.9  | (0.68; 1.2)  | 4.8E-01 |
| cg14517056 | <i>TNRC18</i>       | chr7  | Body    | 0.89 | (0.66; 1.22) | 4.8E-01 |
| cg17141500 | <i>C11orf67</i>     | chr11 | TSS200  | 1.12 | (0.82; 1.54) | 4.8E-01 |
| cg25764217 | <i>GNA12</i>        | chr7  | Body    | 1.13 | (0.81; 1.58) | 4.8E-01 |
| cg13422119 | <i>PDE8A</i>        | chr15 | Body    | 0.89 | (0.64; 1.23) | 4.8E-01 |
| cg01839603 | <i>GNA12</i>        | chr7  | Body    | 1.13 | (0.8; 1.6)   | 4.8E-01 |
| cg04868376 | <i>CDH11</i>        | chr16 | Body    | 1.13 | (0.81; 1.57) | 4.8E-01 |
| cg17522324 | <i>MTCL1</i>        | chr18 | Body    | 1.14 | (0.79; 1.64) | 4.8E-01 |
| cg05066391 | <i>AKAP13</i>       | chr15 | 5'UTR   | 0.87 | (0.59; 1.28) | 4.8E-01 |
| cg10620881 | <i>PTPRN2</i>       | chr7  | Body    | 1.16 | (0.76; 1.78) | 4.8E-01 |
| cg27141514 | <i>RECQL</i>        | chr12 | 1stExon | 1.12 | (0.82; 1.55) | 4.8E-01 |
| cg27141514 | <i>GOLT1B</i>       | chr12 | TSS200  | 1.12 | (0.82; 1.55) | 4.8E-01 |
| cg27141514 | <i>RECQL</i>        | chr12 | 5'UTR   | 1.12 | (0.82; 1.55) | 4.8E-01 |
| cg21979250 | <i>RECQL5</i>       | chr17 | Body    | 0.73 | (0.31; 1.73) | 4.8E-01 |
| cg09041207 | <i>FBXO31</i>       | chr16 | Body    | 1.13 | (0.81; 1.57) | 4.8E-01 |
| cg09041207 | <i>FBXO31</i>       | chr16 | TSS1500 | 1.13 | (0.81; 1.57) | 4.8E-01 |
| cg27104173 | <i>PTPRN2</i>       | chr7  | Body    | 1.12 | (0.81; 1.56) | 4.8E-01 |
| cg22991232 | <i>PTPRN2</i>       | chr7  | Body    | 1.11 | (0.83; 1.49) | 4.8E-01 |
| cg25390412 | <i>PTPRN2</i>       | chr7  | Body    | 0.88 | (0.62; 1.25) | 4.8E-01 |
| cg26029345 | <i>TNFRSF10C</i>    | chr8  | Body    | 0.9  | (0.66; 1.22) | 4.8E-01 |
| cg13656077 | <i>POU2F1</i>       | chr1  | Body    | 1.2  | (0.72; 2.02) | 4.8E-01 |
| cg03690824 | <i>TENM2</i>        | chr5  | Body    | 1.11 | (0.83; 1.5)  | 4.8E-01 |
| cg26533892 | <i>LOC101929698</i> | chr20 | Body    | 1.24 | (0.68; 2.28) | 4.8E-01 |
| cg26533892 | <i>NOL4L</i>        | chr20 | Body    | 1.24 | (0.68; 2.28) | 4.8E-01 |
| cg23972793 | <i>TNRC6C</i>       | chr17 | 5'UTR   | 1.12 | (0.82; 1.52) | 4.8E-01 |
| cg19679210 | <i>TNRC18</i>       | chr7  | Body    | 0.87 | (0.59; 1.28) | 4.8E-01 |
| cg17944326 | <i>PTPRN2</i>       | chr7  | Body    | 0.88 | (0.63; 1.24) | 4.8E-01 |
| cg07874127 | <i>WWOX</i>         | chr16 | 3'UTR   | 1.16 | (0.77; 1.73) | 4.8E-01 |
| cg10258721 | <i>COL1A2</i>       | chr7  | TSS1500 | 1.11 | (0.83; 1.47) | 4.8E-01 |
| cg23123702 | <i>TNFRSF1A</i>     | chr12 | Body    | 0.89 | (0.64; 1.24) | 4.8E-01 |
| cg21611965 | <i>CACNA1C</i>      | chr12 | Body    | 1.13 | (0.8; 1.6)   | 4.8E-01 |
| cg03626208 | <i>CACNA1C</i>      | chr12 | Body    | 0.69 | (0.24; 1.96) | 4.8E-01 |
| cg26794883 | <i>CACNA1C</i>      | chr12 | Body    | 0.87 | (0.59; 1.28) | 4.8E-01 |
| cg08664323 | <i>PTPRS</i>        | chr19 | 5'UTR   | 0.89 | (0.63; 1.24) | 4.8E-01 |
| cg09423037 | <i>TENM2</i>        | chr5  | Body    | 0.87 | (0.59; 1.29) | 4.8E-01 |
| cg10473311 | <i>PTPRN2</i>       | chr7  | Body    | 0.9  | (0.68; 1.2)  | 4.8E-01 |
| cg16337628 | <i>PEX14</i>        | chr1  | Body    | 1.15 | (0.79; 1.67) | 4.8E-01 |
| cg19803194 | <i>PTPRN2</i>       | chr7  | Body    | 0.89 | (0.63; 1.24) | 4.8E-01 |
| cg21341592 | <i>TNFRSF1A</i>     | chr12 | Body    | 1.16 | (0.77; 1.73) | 4.8E-01 |
| cg13135255 | <i>CREBBP</i>       | chr16 | Body    | 0.88 | (0.61; 1.26) | 4.8E-01 |
| cg26160008 | <i>TNFRSF1A</i>     | chr12 | 5'UTR   | 1.15 | (0.78; 1.7)  | 4.8E-01 |
| cg26160008 | <i>TNFRSF1A</i>     | chr12 | 1stExon | 1.15 | (0.78; 1.7)  | 4.8E-01 |
| cg15935227 | <i>PTPRN2</i>       | chr7  | Body    | 1.11 | (0.84; 1.46) | 4.8E-01 |
| cg17420983 | <i>CUX2</i>         | chr12 | TSS1500 | 1.12 | (0.81; 1.55) | 4.8E-01 |
| cg09631415 | <i>CDH11</i>        | chr16 | 5'UTR   | 0.84 | (0.52; 1.36) | 4.8E-01 |
| cg21488876 | <i>PTPRS</i>        | chr19 | Body    | 1.15 | (0.78; 1.71) | 4.8E-01 |
| cg25975382 | <i>PTPRN2</i>       | chr7  | Body    | 1.12 | (0.81; 1.56) | 4.8E-01 |



|            |           |       |         |      |              |         |
|------------|-----------|-------|---------|------|--------------|---------|
| cg23708361 | CNTNAP2   | chr7  | TSS200  | 1.21 | (0.7; 2.09)  | 4.8E-01 |
| cg10065825 | CDH11     | chr16 | TSS1500 | 1.2  | (0.73; 1.97) | 4.8E-01 |
| cg22147968 | CUX2      | chr12 | Body    | 0.9  | (0.66; 1.22) | 4.8E-01 |
| cg17805089 | PTPRN2    | chr7  | Body    | 0.88 | (0.62; 1.25) | 4.8E-01 |
| cg00339232 | ERI3      | chr1  | Body    | 1.13 | (0.8; 1.6)   | 4.8E-01 |
| cg00339232 | ERI3      | chr1  | 5'UTR   | 1.13 | (0.8; 1.6)   | 4.8E-01 |
| cg13333401 | ALCAM     | chr3  | Body    | 0.88 | (0.63; 1.25) | 4.8E-01 |
| cg01623503 | AKAP13    | chr15 | Body    | 1.11 | (0.83; 1.5)  | 4.8E-01 |
| cg24176288 | CACNA1C   | chr12 | Body    | 0.87 | (0.59; 1.28) | 4.8E-01 |
| cg05647867 | PTPRN2    | chr7  | Body    | 0.89 | (0.63; 1.24) | 4.8E-01 |
| cg10209886 | BRUNOL4   | chr18 | 3'UTR   | 0.86 | (0.56; 1.32) | 4.8E-01 |
| cg06722357 | AKAP13    | chr15 | Body    | 0.87 | (0.58; 1.29) | 4.8E-01 |
| cg00336267 | TENM2     | chr5  | Body    | 1.13 | (0.8; 1.58)  | 4.8E-01 |
| cg07892051 | AKAP3     | chr12 | 5'UTR   | 0.88 | (0.61; 1.26) | 4.8E-01 |
| cg16085649 | AKAP13    | chr15 | Body    | 1.13 | (0.8; 1.61)  | 4.8E-01 |
| cg02951552 | MEX3A     | chr1  | 1stExon | 1.2  | (0.72; 1.99) | 4.8E-01 |
| cg14071202 | ZNF704    | chr8  | Body    | 0.86 | (0.57; 1.3)  | 4.8E-01 |
| cg26340657 | TNRC6C    | chr17 | 5'UTR   | 1.14 | (0.78; 1.67) | 4.9E-01 |
| cg01311064 | DACH1     | chr13 | 5'UTR   | 0.89 | (0.64; 1.24) | 4.9E-01 |
| cg01311064 | DACH1     | chr13 | 1stExon | 0.89 | (0.64; 1.24) | 4.9E-01 |
| cg13353646 | GNA12     | chr7  | Body    | 0.88 | (0.62; 1.25) | 4.9E-01 |
| cg13353646 | GNA12     | chr7  | TSS1500 | 0.88 | (0.62; 1.25) | 4.9E-01 |
| cg19683021 | CACNA1C   | chr12 | Body    | 0.83 | (0.49; 1.4)  | 4.9E-01 |
| cg10836779 | RNU5E-1   | chr5  | Body    | 1.17 | (0.75; 1.82) | 4.9E-01 |
| cg03474070 | CDH13     | chr16 | Body    | 1.14 | (0.79; 1.65) | 4.9E-01 |
| cg01474866 | CEP350    | chr1  | Body    | 0.88 | (0.62; 1.26) | 4.9E-01 |
| cg11998002 | TAOK3     | chr12 | 5'UTR   | 0.73 | (0.3; 1.76)  | 4.9E-01 |
| cg12749890 | ATP8A1    | chr4  | Body    | 1.13 | (0.8; 1.6)   | 4.9E-01 |
| cg16518765 | CACNA1C   | chr12 | Body    | 1.14 | (0.78; 1.67) | 4.9E-01 |
| cg24033471 | CACNA1C   | chr12 | Body    | 1.28 | (0.64; 2.53) | 4.9E-01 |
| cg20297825 | CTNND2    | chr5  | Body    | 1.17 | (0.75; 1.83) | 4.9E-01 |
| cg06262098 | TNRC18    | chr7  | Body    | 0.87 | (0.6; 1.27)  | 4.9E-01 |
| cg13184823 | MTNR1A    | chr4  | TSS200  | 0.85 | (0.53; 1.35) | 4.9E-01 |
| cg15722484 | CACNA1C   | chr12 | Body    | 1.15 | (0.77; 1.72) | 4.9E-01 |
| cg12218546 | CACNA1C   | chr12 | Body    | 0.89 | (0.65; 1.23) | 4.9E-01 |
| cg07337611 | TNR       | chr1  | 5'UTR   | 1.11 | (0.82; 1.5)  | 4.9E-01 |
| cg04578258 | CNTNAP2   | chr7  | Body    | 1.14 | (0.79; 1.62) | 4.9E-01 |
| cg09436713 | CACNA1C   | chr12 | Body    | 0.87 | (0.58; 1.3)  | 4.9E-01 |
| cg03911395 | FBXO34    | chr14 | TSS1500 | 1.13 | (0.81; 1.57) | 4.9E-01 |
| cg24601208 | CSMD2     | chr1  | Body    | 1.13 | (0.8; 1.58)  | 4.9E-01 |
| cg18466320 | PTPRN2    | chr7  | Body    | 1.15 | (0.77; 1.72) | 4.9E-01 |
| cg05599723 | TNFRSF1B  | chr1  | Body    | 1.41 | (0.54; 3.71) | 4.9E-01 |
| cg07927098 | PTPRN2    | chr7  | Body    | 1.13 | (0.8; 1.61)  | 4.9E-01 |
| cg05766510 | PTPRN2    | chr7  | Body    | 0.89 | (0.64; 1.24) | 4.9E-01 |
| cg07969095 | ACVR2A    | chr2  | Body    | 1.16 | (0.77; 1.74) | 4.9E-01 |
| cg17086205 | PTPRN2    | chr7  | Body    | 0.88 | (0.62; 1.26) | 4.9E-01 |
| cg09646181 | TNRC6C    | chr17 | Body    | 0.89 | (0.65; 1.23) | 4.9E-01 |
| cg08450080 | PTPRN2    | chr7  | Body    | 0.89 | (0.64; 1.23) | 4.9E-01 |
| cg05080203 | NRXN1     | chr2  | Body    | 0.89 | (0.63; 1.25) | 4.9E-01 |
| cg10364137 | CDH13     | chr16 | 5'UTR   | 0.89 | (0.63; 1.25) | 4.9E-01 |
| cg10364137 | CDH13     | chr16 | Body    | 0.89 | (0.63; 1.25) | 4.9E-01 |
| cg27254392 | RECQL5    | chr17 | TSS200  | 0.88 | (0.62; 1.25) | 4.9E-01 |
| cg06384134 | PTPRN2    | chr7  | Body    | 0.88 | (0.61; 1.27) | 4.9E-01 |
| cg17227156 | BRUNOL4   | chr18 | TSS200  | 1.15 | (0.77; 1.73) | 4.9E-01 |
| cg06716922 | CREBBP    | chr16 | Body    | 1.14 | (0.78; 1.67) | 4.9E-01 |
| cg02140020 | CACNA1C   | chr12 | Body    | 0.88 | (0.62; 1.26) | 4.9E-01 |
| cg24635682 | PTPRU     | chr1  | Body    | 0.87 | (0.59; 1.29) | 4.9E-01 |
| cg21626820 | TNFRSF10C | chr8  | TSS1500 | 0.89 | (0.65; 1.23) | 4.9E-01 |
| cg18806606 | CACNA1C   | chr12 | Body    | 1.14 | (0.79; 1.64) | 4.9E-01 |
| cg13237096 | FBXO32    | chr8  | TSS1500 | 1.13 | (0.8; 1.58)  | 4.9E-01 |
| cg13237096 | FBXO32    | chr8  | Body    | 1.13 | (0.8; 1.58)  | 4.9E-01 |



|            |                  |       |         |      |              |         |
|------------|------------------|-------|---------|------|--------------|---------|
| cg16916578 | <i>PTPRN2</i>    | chr7  | Body    | 0.9  | (0.66; 1.22) | 4.9E-01 |
| cg01317470 | <i>FBXO11</i>    | chr2  | Body    | 0.89 | (0.65; 1.23) | 4.9E-01 |
| cg13470673 | <i>ZBTB20</i>    | chr3  | TSS1500 | 0.91 | (0.69; 1.19) | 4.9E-01 |
| cg13470673 | <i>ZBTB20</i>    | chr3  | 5'UTR   | 0.91 | (0.69; 1.19) | 4.9E-01 |
| cg06638113 | <i>CNTNAP2</i>   | chr7  | Body    | 1.13 | (0.8; 1.59)  | 4.9E-01 |
| cg06315569 | <i>PTPRN2</i>    | chr7  | Body    | 0.89 | (0.63; 1.24) | 4.9E-01 |
| cg15701795 | <i>TENM2</i>     | chr5  | Body    | 1.15 | (0.77; 1.71) | 4.9E-01 |
| cg19209689 | <i>BRUNOL4</i>   | chr18 | Body    | 0.89 | (0.64; 1.24) | 4.9E-01 |
| cg12914511 | <i>PTPRN2</i>    | chr7  | Body    | 1.13 | (0.8; 1.61)  | 4.9E-01 |
| cg25113157 | <i>CUX2</i>      | chr12 | Body    | 1.16 | (0.76; 1.78) | 4.9E-01 |
| cg16048517 | <i>CTNND2</i>    | chr5  | TSS1500 | 1.13 | (0.8; 1.61)  | 4.9E-01 |
| cg00350861 | <i>CDH13</i>     | chr16 | Body    | 0.9  | (0.65; 1.23) | 4.9E-01 |
| cg10238675 | <i>CUX2</i>      | chr12 | Body    | 0.88 | (0.61; 1.27) | 4.9E-01 |
| cg26643724 | <i>RNU5E-1</i>   | chr5  | Body    | 1.11 | (0.82; 1.5)  | 4.9E-01 |
| cg20294763 | <i>TAOK3</i>     | chr12 | Body    | 1.16 | (0.76; 1.78) | 4.9E-01 |
| cg10148614 | <i>CDH13</i>     | chr16 | Body    | 0.89 | (0.63; 1.25) | 4.9E-01 |
| cg06715974 | <i>RAP1B</i>     | chr12 | 5'UTR   | 0.78 | (0.39; 1.57) | 4.9E-01 |
| cg17299156 | <i>TNRC6B</i>    | chr22 | Body    | 0.9  | (0.66; 1.22) | 4.9E-01 |
| cg03884572 | <i>CUX2</i>      | chr12 | Body    | 0.83 | (0.49; 1.41) | 4.9E-01 |
| cg02069674 | <i>CDH13</i>     | chr16 | TSS1500 | 0.9  | (0.66; 1.22) | 4.9E-01 |
| cg15050577 | <i>ARID1A</i>    | chr1  | Body    | 1.12 | (0.82; 1.52) | 4.9E-01 |
| cg02342962 | <i>TENM2</i>     | chr5  | Body    | 0.86 | (0.57; 1.31) | 4.9E-01 |
| cg16915396 | <i>ZNF704</i>    | chr8  | Body    | 1.17 | (0.74; 1.85) | 4.9E-01 |
| cg04379563 | <i>FBXO31</i>    | chr16 | Body    | 0.9  | (0.66; 1.22) | 4.9E-01 |
| cg14550163 | <i>CUX2</i>      | chr12 | Body    | 0.88 | (0.62; 1.26) | 4.9E-01 |
| cg26551569 | <i>FBXO36</i>    | chr2  | Body    | 0.88 | (0.62; 1.26) | 4.9E-01 |
| cg15031003 | <i>TNRC6B</i>    | chr22 | 5'UTR   | 1.14 | (0.79; 1.65) | 4.9E-01 |
| cg08899920 | <i>PTPRN2</i>    | chr7  | Body    | 1.12 | (0.81; 1.56) | 4.9E-01 |
| cg12071044 | <i>PTPRN2</i>    | chr7  | Body    | 1.14 | (0.79; 1.64) | 4.9E-01 |
| cg08285768 | <i>AKAP13</i>    | chr15 | Body    | 1.13 | (0.8; 1.6)   | 4.9E-01 |
| cg25318189 | <i>GNA12</i>     | chr7  | Body    | 1.23 | (0.68; 2.2)  | 4.9E-01 |
| cg02041594 | <i>WWOX</i>      | chr16 | Body    | 0.89 | (0.63; 1.24) | 4.9E-01 |
| cg00501869 | <i>PTPRN2</i>    | chr7  | Body    | 0.89 | (0.63; 1.25) | 4.9E-01 |
| cg07766424 | <i>WWOX</i>      | chr16 | Body    | 1.13 | (0.8; 1.58)  | 4.9E-01 |
| cg06640607 | <i>FBXO31</i>    | chr16 | Body    | 0.89 | (0.62; 1.25) | 4.9E-01 |
| cg02006615 | <i>PTPRN2</i>    | chr7  | Body    | 0.88 | (0.62; 1.26) | 4.9E-01 |
| cg07344315 | <i>RAP1B</i>     | chr12 | 3'UTR   | 0.87 | (0.57; 1.31) | 4.9E-01 |
| cg14410548 | <i>CUX2</i>      | chr12 | Body    | 0.81 | (0.43; 1.49) | 4.9E-01 |
| cg06769918 | <i>PHACTR1</i>   | chr6  | Body    | 0.88 | (0.62; 1.26) | 4.9E-01 |
| cg12466737 | <i>BRUNOL4</i>   | chr18 | TSS1500 | 0.87 | (0.6; 1.28)  | 4.9E-01 |
| cg22205276 | <i>TNFRSF11A</i> | chr18 | 3'UTR   | 0.9  | (0.68; 1.21) | 4.9E-01 |
| cg25783932 | <i>HMGB4</i>     | chr1  | TSS1500 | 1.14 | (0.78; 1.66) | 4.9E-01 |
| cg25783932 | <i>CSMD2</i>     | chr1  | Body    | 1.14 | (0.78; 1.66) | 4.9E-01 |
| cg23105471 | <i>CTDSP2</i>    | chr12 | TSS1500 | 1.12 | (0.8; 1.57)  | 4.9E-01 |
| cg01585418 | <i>FBXO31</i>    | chr16 | 5'UTR   | 1.14 | (0.78; 1.69) | 4.9E-01 |
| cg23168450 | <i>TNFRSF11B</i> | chr8  | Body    | 0.88 | (0.6; 1.28)  | 4.9E-01 |
| cg14136612 | <i>DMXL2</i>     | chr15 | ExonBnd | 1.11 | (0.82; 1.51) | 4.9E-01 |
| cg14136612 | <i>DMXL2</i>     | chr15 | Body    | 1.11 | (0.82; 1.51) | 4.9E-01 |
| cg15423944 | <i>ALCAM</i>     | chr3  | Body    | 0.89 | (0.64; 1.24) | 4.9E-01 |
| cg05749717 | <i>CNTNAP2</i>   | chr7  | TSS200  | 0.89 | (0.65; 1.23) | 4.9E-01 |
| cg03356492 | <i>BRUNOL4</i>   | chr18 | Body    | 1.11 | (0.82; 1.5)  | 4.9E-01 |
| cg00828341 | <i>SUGCT</i>     | chr7  | Body    | 1.11 | (0.82; 1.52) | 4.9E-01 |
| cg04830658 | <i>WAC</i>       | chr10 | Body    | 0.89 | (0.63; 1.25) | 4.9E-01 |
| cg24273728 | <i>ALCAM</i>     | chr3  | Body    | 0.87 | (0.57; 1.31) | 4.9E-01 |
| cg22666828 | <i>BRUNOL4</i>   | chr18 | Body    | 0.86 | (0.55; 1.33) | 5.0E-01 |
| cg02566627 | <i>CTDSP2</i>    | chr12 | Body    | 1.17 | (0.74; 1.85) | 5.0E-01 |
| cg25080630 | <i>COL5A2</i>    | chr2  | Body    | 1.13 | (0.79; 1.61) | 5.0E-01 |
| cg01829623 | <i>CSMD2</i>     | chr1  | Body    | 0.83 | (0.49; 1.41) | 5.0E-01 |
| cg24705093 | <i>CPEB1</i>     | chr15 | Body    | 0.9  | (0.66; 1.22) | 5.0E-01 |
| cg24705093 | <i>CPEB1</i>     | chr15 | 5'UTR   | 0.9  | (0.66; 1.22) | 5.0E-01 |
| cg03970229 | <i>MTNR1B</i>    | chr11 | TSS1500 | 0.87 | (0.59; 1.29) | 5.0E-01 |



|            |                  |       |         |      |              |         |
|------------|------------------|-------|---------|------|--------------|---------|
| cg22200667 | <i>FBXO36</i>    | chr2  | Body    | 1.12 | (0.81; 1.56) | 5.0E-01 |
| cg13217862 | <i>PTPRN2</i>    | chr7  | Body    | 1.12 | (0.81; 1.55) | 5.0E-01 |
| cg18247748 | <i>TNFRSF11A</i> | chr18 | Body    | 0.87 | (0.58; 1.3)  | 5.0E-01 |
| cg02819835 | <i>CSMD2</i>     | chr1  | Body    | 0.89 | (0.63; 1.25) | 5.0E-01 |
| cg15788591 | <i>WAC</i>       | chr10 | Body    | 1.12 | (0.8; 1.57)  | 5.0E-01 |
| cg00035220 | <i>PTPRN2</i>    | chr7  | Body    | 0.9  | (0.65; 1.23) | 5.0E-01 |
| cg26584734 | <i>CACNA1C</i>   | chr12 | Body    | 0.87 | (0.58; 1.31) | 5.0E-01 |
| cg17280671 | <i>ATP8A1</i>    | chr4  | Body    | 1.12 | (0.81; 1.53) | 5.0E-01 |
| cg21266943 | <i>SMARCD3</i>   | chr7  | TSS1500 | 0.85 | (0.54; 1.35) | 5.0E-01 |
| cg21266943 | <i>SMARCD3</i>   | chr7  | Body    | 0.85 | (0.54; 1.35) | 5.0E-01 |
| cg17425144 | <i>PEX14</i>     | chr1  | Body    | 0.9  | (0.67; 1.22) | 5.0E-01 |
| cg06740765 | <i>TENM2</i>     | chr5  | Body    | 1.14 | (0.78; 1.65) | 5.0E-01 |
| cg24887139 | <i>CNTNAP2</i>   | chr7  | 5'UTR   | 1.13 | (0.79; 1.64) | 5.0E-01 |
| cg24887139 | <i>CNTNAP2</i>   | chr7  | 1stExon | 1.13 | (0.79; 1.64) | 5.0E-01 |
| cg02954903 | <i>CCDC80</i>    | chr3  | 5'UTR   | 1.15 | (0.77; 1.7)  | 5.0E-01 |
| cg02954903 | <i>CCDC80</i>    | chr3  | 1stExon | 1.15 | (0.77; 1.7)  | 5.0E-01 |
| cg01878960 | <i>PTPRN2</i>    | chr7  | Body    | 1.14 | (0.79; 1.64) | 5.0E-01 |
| cg04177845 | <i>PTPRN2</i>    | chr7  | Body    | 1.12 | (0.8; 1.56)  | 5.0E-01 |
| cg00264419 | <i>TNFRSF10B</i> | chr8  | Body    | 0.88 | (0.61; 1.28) | 5.0E-01 |
| cg13099374 | <i>POU2F1</i>    | chr1  | Body    | 1.12 | (0.81; 1.56) | 5.0E-01 |
| cg22337375 | <i>PTPRN2</i>    | chr7  | Body    | 0.9  | (0.65; 1.23) | 5.0E-01 |
| cg25326688 | <i>TENM2</i>     | chr5  | Body    | 1.17 | (0.74; 1.84) | 5.0E-01 |
| cg06819775 | <i>RAP1B</i>     | chr12 | TSS1500 | 1.15 | (0.76; 1.75) | 5.0E-01 |
| cg23296792 | <i>FBXO38</i>    | chr5  | Body    | 0.74 | (0.3; 1.79)  | 5.0E-01 |
| cg22557044 | <i>TNFRSF19</i>  | chr13 | Body    | 0.89 | (0.62; 1.26) | 5.0E-01 |
| cg24154853 | <i>PTPRN2</i>    | chr7  | Body    | 0.9  | (0.67; 1.22) | 5.0E-01 |
| cg12811648 | <i>CHFR</i>      | chr12 | Body    | 1.11 | (0.81; 1.52) | 5.0E-01 |
| cg12211161 | <i>PTPRN2</i>    | chr7  | Body    | 0.89 | (0.62; 1.26) | 5.0E-01 |
| cg01172766 | <i>GNA12</i>     | chr7  | Body    | 0.9  | (0.67; 1.22) | 5.0E-01 |
| cg03506452 | <i>CHFR</i>      | chr12 | Body    | 0.87 | (0.58; 1.3)  | 5.0E-01 |
| cg02187889 | <i>CSMD2</i>     | chr1  | Body    | 0.89 | (0.63; 1.25) | 5.0E-01 |
| cg20085311 | <i>PEX14</i>     | chr1  | TSS200  | 1.12 | (0.81; 1.53) | 5.0E-01 |
| cg13878705 | <i>PTPRN2</i>    | chr7  | Body    | 1.13 | (0.8; 1.59)  | 5.0E-01 |
| cg13792714 | <i>ZBTB20</i>    | chr3  | TSS1500 | 0.88 | (0.61; 1.27) | 5.0E-01 |
| cg13792714 | <i>ZBTB20</i>    | chr3  | 5'UTR   | 0.88 | (0.61; 1.27) | 5.0E-01 |
| cg10451116 | <i>MEIS2</i>     | chr15 | Body    | 0.84 | (0.51; 1.39) | 5.0E-01 |
| cg08135950 | <i>FBXO31</i>    | chr16 | Body    | 0.89 | (0.64; 1.24) | 5.0E-01 |
| cg01834541 | <i>PEX14</i>     | chr1  | Body    | 1.12 | (0.81; 1.55) | 5.0E-01 |
| cg02472077 | <i>SUGCT</i>     | chr7  | Body    | 1.15 | (0.77; 1.73) | 5.0E-01 |
| cg12594341 | <i>NRXN1</i>     | chr2  | Body    | 0.89 | (0.63; 1.25) | 5.0E-01 |
| cg04222499 | <i>SUSD4</i>     | chr1  | Body    | 1.12 | (0.8; 1.58)  | 5.0E-01 |
| cg07674974 | <i>ARID1A</i>    | chr1  | Body    | 0.88 | (0.62; 1.27) | 5.0E-01 |
| cg02738205 | <i>CDH13</i>     | chr16 | Body    | 1.13 | (0.79; 1.62) | 5.0E-01 |
| cg04152151 | <i>MBD5</i>      | chr2  | TSS200  | 0.87 | (0.59; 1.3)  | 5.0E-01 |
| cg13819611 | <i>CDH13</i>     | chr16 | Body    | 1.18 | (0.73; 1.88) | 5.0E-01 |
| cg07799043 | <i>CPEB1</i>     | chr15 | TSS200  | 0.87 | (0.57; 1.32) | 5.0E-01 |
| cg07799043 | <i>CPEB1</i>     | chr15 | Body    | 0.87 | (0.57; 1.32) | 5.0E-01 |
| cg21203781 | <i>NRXN1</i>     | chr2  | Body    | 0.89 | (0.64; 1.24) | 5.0E-01 |
| cg16681083 | <i>ERI3</i>      | chr1  | Body    | 1.13 | (0.79; 1.61) | 5.0E-01 |
| cg18251245 | <i>FBXO34</i>    | chr14 | TSS1500 | 0.89 | (0.64; 1.24) | 5.0E-01 |
| cg18251245 | <i>FBXO34</i>    | chr14 | TSS200  | 0.89 | (0.64; 1.24) | 5.0E-01 |
| cg27563529 | <i>ATF7</i>      | chr12 | 3'UTR   | 0.9  | (0.66; 1.22) | 5.0E-01 |
| cg13552669 | <i>TENM2</i>     | chr5  | Body    | 1.2  | (0.71; 2.03) | 5.0E-01 |
| cg03452105 | <i>PTPRN2</i>    | chr7  | Body    | 0.9  | (0.66; 1.22) | 5.0E-01 |
| cg11989218 | <i>CHFR</i>      | chr12 | Body    | 1.13 | (0.79; 1.61) | 5.0E-01 |
| cg02732509 | <i>CTDSP2</i>    | chr12 | TSS1500 | 0.89 | (0.64; 1.25) | 5.0E-01 |
| cg21082130 | <i>PTPRN2</i>    | chr7  | Body    | 0.9  | (0.67; 1.21) | 5.0E-01 |
| cg23998942 | <i>CNTNAP2</i>   | chr7  | Body    | 1.17 | (0.74; 1.84) | 5.0E-01 |
| cg06405602 | <i>WWOX</i>      | chr16 | Body    | 0.88 | (0.6; 1.28)  | 5.0E-01 |
| cg01560476 | <i>TNRC6A</i>    | chr16 | Body    | 0.88 | (0.59; 1.29) | 5.0E-01 |
| cg17755498 | <i>CDH13</i>     | chr16 | 5'UTR   | 1.12 | (0.8; 1.58)  | 5.0E-01 |



|            |                     |       |         |      |              |         |
|------------|---------------------|-------|---------|------|--------------|---------|
| cg17755498 | <i>CDH13</i>        | chr16 | Body    | 1.12 | (0.8; 1.58)  | 5.0E-01 |
| cg15831500 | <i>TNRC6C</i>       | chr17 | 5'UTR   | 0.9  | (0.67; 1.22) | 5.0E-01 |
| cg22859370 | <i>GNA12</i>        | chr7  | Body    | 1.11 | (0.81; 1.52) | 5.0E-01 |
| cg24221919 | <i>PTPRN2</i>       | chr7  | Body    | 0.9  | (0.66; 1.23) | 5.0E-01 |
| cg12144100 | <i>PTPRN2</i>       | chr7  | Body    | 0.89 | (0.63; 1.25) | 5.0E-01 |
| cg16495212 | <i>CPEB1</i>        | chr15 | TSS1500 | 1.16 | (0.75; 1.8)  | 5.0E-01 |
| cg03923850 | <i>CACNA1C</i>      | chr12 | Body    | 0.88 | (0.6; 1.29)  | 5.0E-01 |
| cg01782059 | <i>ERI3</i>         | chr1  | Body    | 0.9  | (0.65; 1.24) | 5.0E-01 |
| cg27181306 | <i>EIF2S1</i>       | chr14 | Body    | 0.86 | (0.55; 1.34) | 5.0E-01 |
| cg20159095 | <i>PTPRN2</i>       | chr7  | Body    | 0.87 | (0.58; 1.31) | 5.0E-01 |
| cg05013250 | <i>ZFP91</i>        | chr11 | TSS1500 | 0.9  | (0.66; 1.23) | 5.0E-01 |
| cg22324780 | <i>NRXN1</i>        | chr2  | Body    | 0.9  | (0.65; 1.23) | 5.0E-01 |
| cg26226356 | <i>CUX2</i>         | chr12 | Body    | 0.88 | (0.59; 1.29) | 5.0E-01 |
| cg06338499 | <i>BRUNOL4</i>      | chr18 | Body    | 1.11 | (0.82; 1.51) | 5.1E-01 |
| cg06410025 | <i>PHACTR1</i>      | chr6  | Body    | 1.12 | (0.81; 1.55) | 5.1E-01 |
| cg04681020 | <i>AKAP13</i>       | chr15 | Body    | 0.89 | (0.63; 1.26) | 5.1E-01 |
| cg15428496 | <i>CTDSPL</i>       | chr3  | Body    | 1.22 | (0.68; 2.22) | 5.1E-01 |
| cg09425164 | <i>PDE8A</i>        | chr15 | Body    | 1.14 | (0.78; 1.65) | 5.1E-01 |
| cg23686623 | <i>ORC4</i>         | chr2  | Body    | 1.13 | (0.78; 1.64) | 5.1E-01 |
| cg23631211 | <i>NRXN1</i>        | chr2  | Body    | 1.13 | (0.79; 1.62) | 5.1E-01 |
| cg06806214 | <i>FBXO31</i>       | chr16 | Body    | 1.12 | (0.81; 1.55) | 5.1E-01 |
| cg09608412 | <i>PTPRN2</i>       | chr7  | Body    | 1.11 | (0.82; 1.51) | 5.1E-01 |
| cg11615758 | <i>PHACTR1</i>      | chr6  | Body    | 1.12 | (0.8; 1.55)  | 5.1E-01 |
| cg23369234 | <i>CACNA1C</i>      | chr12 | Body    | 0.89 | (0.62; 1.26) | 5.1E-01 |
| cg19004608 | <i>PTPRS</i>        | chr19 | 5'UTR   | 0.87 | (0.58; 1.31) | 5.1E-01 |
| cg23127000 | <i>RTN4</i>         | chr2  | Body    | 1.11 | (0.82; 1.5)  | 5.1E-01 |
| cg24902750 | <i>TNRC18</i>       | chr7  | Body    | 1.13 | (0.79; 1.6)  | 5.1E-01 |
| cg23315282 | <i>SUGCT</i>        | chr7  | Body    | 0.87 | (0.59; 1.3)  | 5.1E-01 |
| cg26267333 | <i>CDH13</i>        | chr16 | Body    | 1.15 | (0.76; 1.74) | 5.1E-01 |
| cg10249637 | <i>PTPRN2</i>       | chr7  | Body    | 0.88 | (0.61; 1.28) | 5.1E-01 |
| cg04865442 | <i>FSTL1</i>        | chr3  | Body    | 1.14 | (0.78; 1.65) | 5.1E-01 |
| cg23564028 | <i>CDH11</i>        | chr16 | TSS200  | 1.15 | (0.76; 1.74) | 5.1E-01 |
| cg01084990 | <i>CDH11</i>        | chr16 | 5'UTR   | 1.1  | (0.82; 1.48) | 5.1E-01 |
| cg20924136 | <i>FBXO36</i>       | chr2  | Body    | 1.17 | (0.73; 1.88) | 5.1E-01 |
| cg04597111 | <i>PDE8A</i>        | chr15 | TSS200  | 1.15 | (0.76; 1.73) | 5.1E-01 |
| cg26782884 | <i>MBD5</i>         | chr2  | 5'UTR   | 1.12 | (0.8; 1.58)  | 5.1E-01 |
| cg01954514 | <i>CHFR</i>         | chr12 | Body    | 0.9  | (0.67; 1.22) | 5.1E-01 |
| cg04864538 | <i>PTPRN2</i>       | chr7  | Body    | 1.12 | (0.8; 1.59)  | 5.1E-01 |
| cg12750730 | <i>TAOK3</i>        | chr12 | 5'UTR   | 1.26 | (0.63; 2.52) | 5.1E-01 |
| cg22425438 | <i>PTPRN2</i>       | chr7  | Body    | 1.11 | (0.82; 1.5)  | 5.1E-01 |
| cg17290573 | <i>FBXO34</i>       | chr14 | 5'UTR   | 0.89 | (0.63; 1.26) | 5.1E-01 |
| cg07146799 | <i>MEIS2</i>        | chr15 | Body    | 0.9  | (0.66; 1.23) | 5.1E-01 |
| cg23794377 | <i>RTN4</i>         | chr2  | Body    | 1.13 | (0.79; 1.63) | 5.1E-01 |
| cg08838522 | <i>CHCHD6</i>       | chr3  | Body    | 1.24 | (0.65; 2.37) | 5.1E-01 |
| cg11619216 | <i>LOC100130933</i> | chr17 | TSS1500 | 1.2  | (0.7; 2.08)  | 5.1E-01 |
| cg11619216 | <i>RECQL5</i>       | chr17 | Body    | 1.2  | (0.7; 2.08)  | 5.1E-01 |
| cg18767547 | <i>SCAF8</i>        | chr6  | Body    | 0.9  | (0.65; 1.24) | 5.1E-01 |
| cg20083900 | <i>PTPRN2</i>       | chr7  | Body    | 0.88 | (0.61; 1.27) | 5.1E-01 |
| cg05755118 | <i>TNFRSF19</i>     | chr13 | TSS1500 | 0.89 | (0.63; 1.26) | 5.1E-01 |
| cg04508331 | <i>SLC16A9</i>      | chr10 | 5'UTR   | 0.86 | (0.55; 1.35) | 5.1E-01 |
| cg09271709 | <i>NRXN1</i>        | chr2  | Body    | 1.14 | (0.77; 1.7)  | 5.1E-01 |
| cg15012247 | <i>TNRC6B</i>       | chr22 | Body    | 0.89 | (0.62; 1.27) | 5.1E-01 |
| cg05581460 | <i>PTPRN2</i>       | chr7  | Body    | 0.89 | (0.64; 1.25) | 5.1E-01 |
| cg12773464 | <i>PTPRN2</i>       | chr7  | Body    | 1.13 | (0.79; 1.6)  | 5.1E-01 |
| cg02350414 | <i>CUX2</i>         | chr12 | Body    | 1.17 | (0.73; 1.87) | 5.1E-01 |
| cg25557995 | <i>CACNA1C</i>      | chr12 | Body    | 0.88 | (0.62; 1.27) | 5.1E-01 |
| cg24207009 | <i>TNRC6C</i>       | chr17 | 5'UTR   | 1.18 | (0.73; 1.9)  | 5.1E-01 |
| cg03328711 | <i>PTPRN2</i>       | chr7  | Body    | 0.9  | (0.66; 1.23) | 5.1E-01 |
| cg23521476 | <i>TNRC6B</i>       | chr22 | 3'UTR   | 1.12 | (0.8; 1.56)  | 5.1E-01 |
| cg13671412 | <i>PTPRS</i>        | chr19 | 5'UTR   | 1.1  | (0.83; 1.45) | 5.1E-01 |
| cg21684809 | <i>GNA12</i>        | chr7  | Body    | 0.89 | (0.64; 1.25) | 5.1E-01 |



|            |                |       |         |      |              |         |
|------------|----------------|-------|---------|------|--------------|---------|
| cg21684809 | <i>GNA12</i>   | chr7  | TSS200  | 0.89 | (0.64; 1.25) | 5.1E-01 |
| cg26160492 | <i>CTDSPL</i>  | chr3  | Body    | 0.88 | (0.61; 1.28) | 5.1E-01 |
| cg05510129 | <i>CACNA1C</i> | chr12 | Body    | 1.13 | (0.78; 1.63) | 5.1E-01 |
| cg26392691 | <i>DMXL2</i>   | chr15 | TSS200  | 1.12 | (0.8; 1.57)  | 5.1E-01 |
| cg02536793 | <i>TENM2</i>   | chr5  | Body    | 0.86 | (0.54; 1.36) | 5.1E-01 |
| cg24351649 | <i>TNRC18</i>  | chr7  | TSS1500 | 0.9  | (0.66; 1.23) | 5.1E-01 |
| cg04059568 | <i>PTPRN2</i>  | chr7  | Body    | 0.87 | (0.56; 1.33) | 5.1E-01 |
| cg24866457 | <i>CACNA1C</i> | chr12 | TSS200  | 1.12 | (0.8; 1.55)  | 5.1E-01 |
| cg16395205 | <i>CREBBP</i>  | chr16 | Body    | 1.12 | (0.8; 1.57)  | 5.1E-01 |
| cg27611274 | <i>PTPRN2</i>  | chr7  | Body    | 0.89 | (0.63; 1.26) | 5.1E-01 |
| cg24455950 | <i>TAOK3</i>   | chr12 | Body    | 0.88 | (0.61; 1.28) | 5.1E-01 |
| cg07577569 | <i>CHD6</i>    | chr20 | 5'UTR   | 1.12 | (0.8; 1.57)  | 5.1E-01 |
| cg11977326 | <i>ERI3</i>    | chr1  | TSS200  | 0.9  | (0.66; 1.23) | 5.1E-01 |
| cg06031500 | <i>CTDSP2</i>  | chr12 | Body    | 0.9  | (0.67; 1.22) | 5.1E-01 |
| cg05650416 | <i>CACNA1C</i> | chr12 | Body    | 1.15 | (0.76; 1.75) | 5.1E-01 |
| cg11968625 | <i>FBXO32</i>  | chr8  | 3'UTR   | 0.91 | (0.69; 1.21) | 5.1E-01 |
| cg14178347 | <i>PTPRN2</i>  | chr7  | Body    | 1.12 | (0.8; 1.55)  | 5.1E-01 |
| cg02559817 | <i>WWOX</i>    | chr16 | Body    | 1.13 | (0.78; 1.66) | 5.1E-01 |
| cg06386789 | <i>CDH13</i>   | chr16 | 5'UTR   | 0.89 | (0.64; 1.25) | 5.1E-01 |
| cg06386789 | <i>CDH13</i>   | chr16 | Body    | 0.89 | (0.64; 1.25) | 5.1E-01 |
| cg14791846 | <i>CDH13</i>   | chr16 | Body    | 0.87 | (0.58; 1.31) | 5.1E-01 |
| cg22955774 | <i>CSMD2</i>   | chr1  | Body    | 0.9  | (0.65; 1.24) | 5.1E-01 |
| cg03163469 | <i>CSMD2</i>   | chr1  | Body    | 1.12 | (0.79; 1.6)  | 5.1E-01 |
| cg04363087 | <i>TENM2</i>   | chr5  | Body    | 0.89 | (0.64; 1.25) | 5.1E-01 |
| cg12583927 | <i>SLC16A9</i> | chr10 | TSS200  | 0.89 | (0.62; 1.27) | 5.1E-01 |
| cg03147861 | <i>PTPRN2</i>  | chr7  | Body    | 0.89 | (0.64; 1.25) | 5.1E-01 |
| cg09438147 | <i>UNC80</i>   | chr2  | TSS200  | 1.16 | (0.75; 1.8)  | 5.1E-01 |
| cg06531613 | <i>CDH13</i>   | chr16 | Body    | 0.89 | (0.64; 1.25) | 5.1E-01 |
| cg02680629 | <i>FBXO38</i>  | chr5  | 5'UTR   | 1.12 | (0.8; 1.57)  | 5.1E-01 |
| cg02680629 | <i>FBXO38</i>  | chr5  | 1stExon | 1.12 | (0.8; 1.57)  | 5.1E-01 |
| cg06225294 | <i>ZBTB20</i>  | chr3  | 5'UTR   | 0.91 | (0.68; 1.22) | 5.1E-01 |
| cg06225294 | <i>ZBTB20</i>  | chr3  | 1stExon | 0.91 | (0.68; 1.22) | 5.1E-01 |
| cg21121024 | <i>RTN4RL2</i> | chr11 | TSS1500 | 0.9  | (0.66; 1.23) | 5.1E-01 |
| cg20797106 | <i>PTPRN2</i>  | chr7  | Body    | 0.91 | (0.68; 1.21) | 5.1E-01 |
| cg25513800 | <i>CPEB1</i>   | chr15 | Body    | 0.89 | (0.63; 1.26) | 5.1E-01 |
| cg10753101 | <i>PTPRN2</i>  | chr7  | Body    | 1.11 | (0.81; 1.54) | 5.1E-01 |
| cg07676894 | <i>PTPRS</i>   | chr19 | Body    | 1.2  | (0.69; 2.09) | 5.1E-01 |
| cg23454082 | <i>RTN4</i>    | chr2  | Body    | 0.91 | (0.68; 1.22) | 5.1E-01 |
| cg23454082 | <i>RTN4</i>    | chr2  | 5'UTR   | 0.91 | (0.68; 1.22) | 5.1E-01 |
| cg00369443 | <i>PTPRN2</i>  | chr7  | Body    | 1.11 | (0.81; 1.52) | 5.1E-01 |
| cg06769759 | <i>CTNND2</i>  | chr5  | Body    | 0.9  | (0.65; 1.24) | 5.2E-01 |
| cg06769759 | <i>CTNND2</i>  | chr5  | 5'UTR   | 0.9  | (0.65; 1.24) | 5.2E-01 |
| cg06769759 | <i>CTNND2</i>  | chr5  | TSS1500 | 0.9  | (0.65; 1.24) | 5.2E-01 |
| cg16544621 | <i>PHACTR1</i> | chr6  | Body    | 1.16 | (0.74; 1.8)  | 5.2E-01 |
| cg19212465 | <i>PTPRN2</i>  | chr7  | Body    | 0.84 | (0.5; 1.41)  | 5.2E-01 |
| cg00298331 | <i>ELAVL4</i>  | chr1  | Body    | 1.14 | (0.77; 1.7)  | 5.2E-01 |
| cg22560123 | <i>RTN4RL2</i> | chr11 | TSS1500 | 1.12 | (0.79; 1.59) | 5.2E-01 |
| cg02704570 | <i>PTPRN2</i>  | chr7  | Body    | 1.29 | (0.6; 2.76)  | 5.2E-01 |
| cg17138775 | <i>MTCL1</i>   | chr18 | Body    | 1.11 | (0.8; 1.54)  | 5.2E-01 |
| cg06638529 | <i>ERI3</i>    | chr1  | Body    | 0.77 | (0.34; 1.72) | 5.2E-01 |
| cg18816701 | <i>CACNA1C</i> | chr12 | Body    | 1.13 | (0.78; 1.65) | 5.2E-01 |
| cg09134946 | <i>PTPRN2</i>  | chr7  | Body    | 1.12 | (0.8; 1.57)  | 5.2E-01 |
| cg20852862 | <i>RNU5E-1</i> | chr5  | Body    | 1.09 | (0.83; 1.43) | 5.2E-01 |
| cg26238835 | <i>TSHZ3</i>   | chr19 | Body    | 1.22 | (0.66; 2.26) | 5.2E-01 |
| cg18964988 | <i>CUX2</i>    | chr12 | TSS1500 | 0.9  | (0.66; 1.23) | 5.2E-01 |
| cg21227048 | <i>TNRC18</i>  | chr7  | TSS200  | 0.9  | (0.67; 1.23) | 5.2E-01 |
| cg09315468 | <i>DDHD2</i>   | chr8  | 5'UTR   | 0.91 | (0.69; 1.21) | 5.2E-01 |
| cg09315468 | <i>DDHD2</i>   | chr8  | 1stExon | 0.91 | (0.69; 1.21) | 5.2E-01 |
| cg25950036 | <i>PTPRN2</i>  | chr7  | Body    | 0.89 | (0.64; 1.26) | 5.2E-01 |
| cg08720527 | <i>PTPRU</i>   | chr1  | Body    | 0.87 | (0.57; 1.33) | 5.2E-01 |
| cg26924544 | <i>PHACTR1</i> | chr6  | Body    | 0.87 | (0.58; 1.32) | 5.2E-01 |



|            |                     |       |         |      |              |         |
|------------|---------------------|-------|---------|------|--------------|---------|
| cg14864243 | <i>CDH13</i>        | chr16 | 5'UTR   | 0.89 | (0.63; 1.26) | 5.2E-01 |
| cg14864243 | <i>CDH13</i>        | chr16 | Body    | 0.89 | (0.63; 1.26) | 5.2E-01 |
| cg11282531 | <i>MEIS2</i>        | chr15 | TSS200  | 1.14 | (0.77; 1.69) | 5.2E-01 |
| cg11282531 | <i>MEIS2</i>        | chr15 | TSS1500 | 1.14 | (0.77; 1.69) | 5.2E-01 |
| cg07635106 | <i>CHD6</i>         | chr20 | TSS200  | 0.9  | (0.65; 1.24) | 5.2E-01 |
| cg18479082 | <i>PTPRN2</i>       | chr7  | Body    | 0.9  | (0.64; 1.25) | 5.2E-01 |
| cg06196755 | <i>TSHZ3</i>        | chr19 | Body    | 1.13 | (0.78; 1.62) | 5.2E-01 |
| cg24107979 | <i>BRUNOL4</i>      | chr18 | TSS1500 | 0.89 | (0.63; 1.26) | 5.2E-01 |
| cg16338347 | <i>ALCAM</i>        | chr3  | TSS1500 | 1.11 | (0.81; 1.53) | 5.2E-01 |
| cg16278635 | <i>CDH13</i>        | chr16 | 5'UTR   | 1.13 | (0.78; 1.64) | 5.2E-01 |
| cg16278635 | <i>CDH13</i>        | chr16 | Body    | 1.13 | (0.78; 1.64) | 5.2E-01 |
| cg16640149 | <i>FBXO38</i>       | chr5  | 3'UTR   | 1.12 | (0.8; 1.56)  | 5.2E-01 |
| cg10501306 | <i>ZBTB20</i>       | chr3  | Body    | 0.88 | (0.6; 1.3)   | 5.2E-01 |
| cg10501306 | <i>ZBTB20</i>       | chr3  | 5'UTR   | 0.88 | (0.6; 1.3)   | 5.2E-01 |
| cg15059013 | <i>TNFRSF19</i>     | chr13 | Body    | 1.1  | (0.83; 1.46) | 5.2E-01 |
| cg19128364 | <i>PTPRN2</i>       | chr7  | Body    | 0.91 | (0.68; 1.22) | 5.2E-01 |
| cg22322562 | <i>NRXN1</i>        | chr2  | Body    | 1.12 | (0.79; 1.58) | 5.2E-01 |
| cg11523366 | <i>GNA12</i>        | chr7  | Body    | 1.19 | (0.71; 1.99) | 5.2E-01 |
| cg21080591 | <i>PTPRN2</i>       | chr7  | Body    | 1.27 | (0.61; 2.66) | 5.2E-01 |
| cg06892918 | <i>ATF7</i>         | chr12 | Body    | 1.1  | (0.82; 1.48) | 5.2E-01 |
| cg01565905 | <i>FBXO34</i>       | chr14 | 5'UTR   | 0.91 | (0.67; 1.22) | 5.2E-01 |
| cg20777401 | <i>CACNA1C</i>      | chr12 | Body    | 0.88 | (0.59; 1.3)  | 5.2E-01 |
| cg12582957 | <i>PTPRN2</i>       | chr7  | Body    | 1.11 | (0.8; 1.54)  | 5.2E-01 |
| cg03376719 | <i>ALCAM</i>        | chr3  | Body    | 0.9  | (0.67; 1.23) | 5.2E-01 |
| cg19593401 | <i>CCDC80</i>       | chr3  | TSS1500 | 0.88 | (0.59; 1.3)  | 5.2E-01 |
| cg08524986 | <i>ORC4</i>         | chr2  | Body    | 0.88 | (0.6; 1.3)   | 5.2E-01 |
| cg15463900 | <i>DACH1</i>        | chr13 | Body    | 0.88 | (0.6; 1.3)   | 5.2E-01 |
| cg12057517 | <i>WAC</i>          | chr10 | Body    | 0.89 | (0.61; 1.28) | 5.2E-01 |
| cg04619806 | <i>NOL4L</i>        | chr20 | Body    | 1.19 | (0.7; 2.03)  | 5.2E-01 |
| cg09762932 | <i>NOL4L</i>        | chr20 | Body    | 1.12 | (0.8; 1.56)  | 5.2E-01 |
| cg01286385 | <i>CHD6</i>         | chr20 | Body    | 0.91 | (0.69; 1.21) | 5.2E-01 |
| cg03209809 | <i>CHCHD6</i>       | chr3  | TSS1500 | 1.14 | (0.76; 1.71) | 5.2E-01 |
| cg08414888 | <i>PTPRN2</i>       | chr7  | Body    | 0.9  | (0.65; 1.24) | 5.2E-01 |
| cg01063935 | <i>PEX14</i>        | chr1  | Body    | 0.9  | (0.66; 1.24) | 5.2E-01 |
| cg00957585 | <i>AKAP13</i>       | chr15 | Body    | 1.13 | (0.78; 1.64) | 5.2E-01 |
| cg18035136 | <i>PHACTR1</i>      | chr6  | 1stExon | 1.11 | (0.81; 1.53) | 5.2E-01 |
| cg18035136 | <i>PHACTR1</i>      | chr6  | 5'UTR   | 1.11 | (0.81; 1.53) | 5.2E-01 |
| cg14242405 | <i>PTPRN2</i>       | chr7  | Body    | 0.89 | (0.62; 1.27) | 5.2E-01 |
| cg02952905 | <i>DNAI2</i>        | chr17 | Body    | 1.19 | (0.69; 2.06) | 5.2E-01 |
| cg21501616 | <i>DCUN1D4</i>      | chr4  | TSS1500 | 0.9  | (0.65; 1.25) | 5.2E-01 |
| cg10407598 | <i>RECQL5</i>       | chr17 | Body    | 0.89 | (0.63; 1.26) | 5.2E-01 |
| cg01939872 | <i>TXNDC9</i>       | chr2  | Body    | 0.89 | (0.63; 1.26) | 5.2E-01 |
| cg02172395 | <i>ARID1A</i>       | chr1  | Body    | 1.11 | (0.81; 1.52) | 5.2E-01 |
| cg09838302 | <i>TNRC6B</i>       | chr22 | Body    | 0.88 | (0.61; 1.29) | 5.2E-01 |
| cg10392281 | <i>CNTF</i>         | chr11 | TSS1500 | 1.14 | (0.76; 1.71) | 5.2E-01 |
| cg25981546 | <i>PTPRN2</i>       | chr7  | Body    | 0.9  | (0.65; 1.24) | 5.2E-01 |
| cg09603030 | <i>CSMD2</i>        | chr1  | Body    | 0.89 | (0.62; 1.28) | 5.2E-01 |
| cg10963021 | <i>CREBBP</i>       | chr16 | Body    | 0.89 | (0.63; 1.27) | 5.2E-01 |
| cg19746375 | <i>PTPRN2</i>       | chr7  | Body    | 0.89 | (0.63; 1.26) | 5.2E-01 |
| cg08916844 | <i>CDH13</i>        | chr16 | Body    | 0.91 | (0.67; 1.22) | 5.2E-01 |
| cg05947666 | <i>SGIP1</i>        | chr1  | Body    | 0.9  | (0.65; 1.25) | 5.2E-01 |
| cg02735685 | <i>ATF7</i>         | chr12 | Body    | 1.4  | (0.5; 3.98)  | 5.2E-01 |
| cg01239944 | <i>GNA12</i>        | chr7  | Body    | 0.88 | (0.59; 1.31) | 5.2E-01 |
| cg25030888 | <i>SGIP1</i>        | chr1  | Body    | 1.11 | (0.8; 1.56)  | 5.2E-01 |
| cg05753823 | <i>FBXO38</i>       | chr5  | Body    | 1.12 | (0.79; 1.59) | 5.2E-01 |
| cg27560690 | <i>FBXO11</i>       | chr2  | 5'UTR   | 1.11 | (0.81; 1.51) | 5.2E-01 |
| cg10001715 | <i>WWOX</i>         | chr16 | Body    | 1.2  | (0.69; 2.1)  | 5.2E-01 |
| cg01534527 | <i>CTDSPL</i>       | chr3  | Body    | 0.83 | (0.46; 1.48) | 5.2E-01 |
| cg14691671 | <i>LOC100130933</i> | chr17 | TSS200  | 0.78 | (0.36; 1.69) | 5.2E-01 |
| cg14691671 | <i>RECQL5</i>       | chr17 | Body    | 0.78 | (0.36; 1.69) | 5.2E-01 |
| cg26859186 | <i>PTPRN2</i>       | chr7  | Body    | 0.91 | (0.68; 1.22) | 5.2E-01 |



|            |                 |       |         |      |              |         |
|------------|-----------------|-------|---------|------|--------------|---------|
| cg04373993 | <i>PTPRN2</i>   | chr7  | Body    | 0.9  | (0.66; 1.24) | 5.2E-01 |
| cg23064424 | <i>ZBTB20</i>   | chr3  | ExonBnd | 0.89 | (0.63; 1.27) | 5.2E-01 |
| cg23064424 | <i>ZBTB20</i>   | chr3  | Body    | 0.89 | (0.63; 1.27) | 5.2E-01 |
| cg23064424 | <i>ZBTB20</i>   | chr3  | 5'UTR   | 0.89 | (0.63; 1.27) | 5.2E-01 |
| cg15865069 | <i>PTPRN2</i>   | chr7  | Body    | 1.13 | (0.78; 1.63) | 5.2E-01 |
| cg12350325 | <i>CACNA1C</i>  | chr12 | 3'UTR   | 0.91 | (0.68; 1.22) | 5.2E-01 |
| cg05622865 | <i>NOL4L</i>    | chr20 | TSS1500 | 1.1  | (0.83; 1.45) | 5.2E-01 |
| cg26675336 | <i>AKAP13</i>   | chr15 | Body    | 0.9  | (0.64; 1.26) | 5.2E-01 |
| cg11215154 | <i>NRXN1</i>    | chr2  | Body    | 0.88 | (0.6; 1.29)  | 5.2E-01 |
| cg26856583 | <i>FBXO31</i>   | chr16 | TSS200  | 0.88 | (0.61; 1.29) | 5.2E-01 |
| cg01722003 | <i>CNTNAP2</i>  | chr7  | Body    | 0.91 | (0.68; 1.21) | 5.2E-01 |
| cg13666648 | <i>ZBTB20</i>   | chr3  | 5'UTR   | 0.88 | (0.6; 1.29)  | 5.2E-01 |
| cg24433341 | <i>DNAI2</i>    | chr17 | 5'UTR   | 0.91 | (0.67; 1.23) | 5.3E-01 |
| cg17255756 | <i>DDHD2</i>    | chr8  | Body    | 0.89 | (0.62; 1.28) | 5.3E-01 |
| cg00756092 | <i>CACNA1C</i>  | chr12 | Body    | 0.87 | (0.57; 1.33) | 5.3E-01 |
| cg03375049 | <i>CDH13</i>    | chr16 | Body    | 1.18 | (0.7; 1.99)  | 5.3E-01 |
| cg14419740 | <i>PTPRN2</i>   | chr7  | Body    | 0.9  | (0.64; 1.26) | 5.3E-01 |
| cg26510723 | <i>PTPRN2</i>   | chr7  | Body    | 0.91 | (0.66; 1.23) | 5.3E-01 |
| cg20603821 | <i>PTPRN2</i>   | chr7  | Body    | 1.13 | (0.77; 1.67) | 5.3E-01 |
| cg16909365 | <i>POU2F1</i>   | chr1  | Body    | 1.14 | (0.76; 1.71) | 5.3E-01 |
| cg07208565 | <i>UBE2E2</i>   | chr3  | Body    | 1.11 | (0.8; 1.53)  | 5.3E-01 |
| cg07720188 | <i>TNFRSF19</i> | chr13 | TSS1500 | 0.9  | (0.65; 1.25) | 5.3E-01 |
| cg03767699 | <i>RTN4RL1</i>  | chr17 | Body    | 1.13 | (0.78; 1.63) | 5.3E-01 |
| cg12855461 | <i>TNFRSF19</i> | chr13 | 5'UTR   | 0.9  | (0.64; 1.26) | 5.3E-01 |
| cg03091738 | <i>CTDSP2</i>   | chr12 | Body    | 0.89 | (0.63; 1.27) | 5.3E-01 |
| cg24861859 | <i>TNR</i>      | chr1  | 5'UTR   | 0.9  | (0.64; 1.25) | 5.3E-01 |
| cg05382123 | <i>CSMD2</i>    | chr1  | TSS1500 | 0.88 | (0.6; 1.3)   | 5.3E-01 |
| cg13794881 | <i>FSTL1</i>    | chr3  | Body    | 0.9  | (0.64; 1.26) | 5.3E-01 |
| cg05465821 | <i>NOL4L</i>    | chr20 | Body    | 0.68 | (0.2; 2.26)  | 5.3E-01 |
| cg16792948 | <i>TNRC6A</i>   | chr16 | TSS200  | 0.9  | (0.64; 1.26) | 5.3E-01 |
| cg00940546 | <i>ZNF704</i>   | chr8  | 5'UTR   | 1.19 | (0.69; 2.07) | 5.3E-01 |
| cg05979433 | <i>CUX2</i>     | chr12 | Body    | 1.1  | (0.81; 1.51) | 5.3E-01 |
| cg26100303 | <i>ZBTB20</i>   | chr3  | 5'UTR   | 1.12 | (0.78; 1.62) | 5.3E-01 |
| cg15014137 | <i>ZNF704</i>   | chr8  | Body    | 1.16 | (0.73; 1.83) | 5.3E-01 |
| cg08446633 | <i>TNRC6C</i>   | chr17 | 3'UTR   | 0.9  | (0.65; 1.25) | 5.3E-01 |
| cg23299919 | <i>PTPRN2</i>   | chr7  | Body    | 1.14 | (0.76; 1.68) | 5.3E-01 |
| cg08301254 | <i>CUX2</i>     | chr12 | Body    | 1.13 | (0.78; 1.63) | 5.3E-01 |
| cg14739284 | <i>CNTNAP2</i>  | chr7  | Body    | 0.9  | (0.64; 1.26) | 5.3E-01 |
| cg13399697 | <i>PTPRU</i>    | chr1  | Body    | 0.9  | (0.66; 1.24) | 5.3E-01 |
| cg16004800 | <i>NDUFA9</i>   | chr12 | Body    | 0.9  | (0.66; 1.24) | 5.3E-01 |
| cg12416878 | <i>UBE2E2</i>   | chr3  | Body    | 0.79 | (0.38; 1.64) | 5.3E-01 |
| cg15091264 | <i>CDH13</i>    | chr16 | Body    | 1.1  | (0.81; 1.5)  | 5.3E-01 |
| cg11227987 | <i>PTPRN2</i>   | chr7  | Body    | 0.89 | (0.62; 1.28) | 5.3E-01 |
| cg16832671 | <i>WWOX</i>     | chr16 | Body    | 1.11 | (0.8; 1.54)  | 5.3E-01 |
| cg15489593 | <i>TNRC6C</i>   | chr17 | 5'UTR   | 1.1  | (0.82; 1.48) | 5.3E-01 |
| cg11782594 | <i>UBE2E2</i>   | chr3  | Body    | 1.13 | (0.77; 1.65) | 5.3E-01 |
| cg02463653 | <i>PTPRS</i>    | chr19 | 5'UTR   | 0.87 | (0.56; 1.34) | 5.3E-01 |
| cg09184202 | <i>PTPRN2</i>   | chr7  | Body    | 1.12 | (0.79; 1.57) | 5.3E-01 |
| cg01718785 | <i>PTPRN2</i>   | chr7  | Body    | 1.11 | (0.81; 1.52) | 5.3E-01 |
| cg10471944 | <i>PTPRN2</i>   | chr7  | Body    | 0.9  | (0.64; 1.26) | 5.3E-01 |
| cg24636003 | <i>PTPRU</i>    | chr1  | Body    | 0.89 | (0.63; 1.27) | 5.3E-01 |
| cg11667785 | <i>GNA12</i>    | chr7  | Body    | 0.9  | (0.64; 1.25) | 5.3E-01 |
| cg13928313 | <i>GNA12</i>    | chr7  | Body    | 1.12 | (0.79; 1.59) | 5.3E-01 |
| cg08941759 | <i>CHCHD6</i>   | chr3  | TSS200  | 0.9  | (0.65; 1.25) | 5.3E-01 |
| cg08271366 | <i>CDH13</i>    | chr16 | Body    | 1.11 | (0.81; 1.52) | 5.3E-01 |
| cg03564061 | <i>CACNA1C</i>  | chr12 | Body    | 1.14 | (0.76; 1.71) | 5.3E-01 |
| cg23246939 | <i>WAC</i>      | chr10 | Body    | 0.91 | (0.68; 1.22) | 5.3E-01 |
| cg10765212 | <i>COL5A2</i>   | chr2  | TSS200  | 1.13 | (0.77; 1.67) | 5.3E-01 |
| cg16397629 | <i>CHD6</i>     | chr20 | Body    | 1.14 | (0.76; 1.71) | 5.3E-01 |
| cg27109907 | <i>WWOX</i>     | chr16 | Body    | 0.9  | (0.64; 1.26) | 5.3E-01 |
| cg20567227 | <i>ATP8A1</i>   | chr4  | Body    | 0.9  | (0.66; 1.24) | 5.3E-01 |



|            |             |       |         |      |              |         |
|------------|-------------|-------|---------|------|--------------|---------|
| cg22640847 | SMARCD3     | chr7  | 1stExon | 0.89 | (0.62; 1.28) | 5.3E-01 |
| cg22640847 | SMARCD3     | chr7  | Body    | 0.89 | (0.62; 1.28) | 5.3E-01 |
| cg19458485 | PHACTR1     | chr6  | Body    | 1.1  | (0.81; 1.49) | 5.3E-01 |
| cg24439166 | ALCAM       | chr3  | Body    | 0.88 | (0.6; 1.31)  | 5.3E-01 |
| cg03081478 | GNA12       | chr7  | Body    | 0.79 | (0.37; 1.67) | 5.3E-01 |
| cg00514964 | UNC80       | chr2  | Body    | 0.89 | (0.63; 1.27) | 5.3E-01 |
| cg08195448 | NOL4        | chr18 | TSS1500 | 0.89 | (0.61; 1.29) | 5.3E-01 |
| cg06034014 | CDH13       | chr16 | 5'UTR   | 1.12 | (0.78; 1.6)  | 5.3E-01 |
| cg06034014 | CDH13       | chr16 | Body    | 1.12 | (0.78; 1.6)  | 5.3E-01 |
| cg14824984 | FBXO36      | chr2  | Body    | 1.11 | (0.8; 1.53)  | 5.3E-01 |
| cg26808293 | TNFRSF12A   | chr16 | 3'UTR   | 0.88 | (0.58; 1.33) | 5.3E-01 |
| cg08022244 | PTPRN2      | chr7  | Body    | 0.9  | (0.65; 1.25) | 5.3E-01 |
| cg03084158 | GNA12       | chr7  | Body    | 0.91 | (0.67; 1.23) | 5.3E-01 |
| cg15260349 | MTNR1B      | chr11 | TSS1500 | 0.9  | (0.64; 1.26) | 5.3E-01 |
| cg16694011 | CNTNAP2     | chr7  | Body    | 1.16 | (0.73; 1.84) | 5.3E-01 |
| cg02877029 | AKAP13      | chr15 | Body    | 1.11 | (0.8; 1.53)  | 5.3E-01 |
| cg03475420 | RTN4R       | chr22 | 5'UTR   | 1.12 | (0.79; 1.59) | 5.3E-01 |
| cg03475420 | RTN4R       | chr22 | 1stExon | 1.12 | (0.79; 1.59) | 5.3E-01 |
| cg12813441 | RTN4        | chr2  | Body    | 1.1  | (0.81; 1.5)  | 5.3E-01 |
| cg25097167 | TENM2       | chr5  | Body    | 0.89 | (0.63; 1.27) | 5.3E-01 |
| cg00231927 | PTPRN2      | chr7  | Body    | 1.1  | (0.82; 1.48) | 5.3E-01 |
| cg24005949 | CSMD2       | chr1  | Body    | 0.9  | (0.64; 1.26) | 5.4E-01 |
| cg19551848 | CNTNAP2     | chr7  | Body    | 0.9  | (0.64; 1.26) | 5.4E-01 |
| cg16979355 | NOL4        | chr18 | 5'UTR   | 0.89 | (0.63; 1.27) | 5.4E-01 |
| cg16979355 | NOL4        | chr18 | Body    | 0.89 | (0.63; 1.27) | 5.4E-01 |
| cg10552603 | PTPRN2      | chr7  | Body    | 0.91 | (0.66; 1.24) | 5.4E-01 |
| cg25052941 | CNTNAP2     | chr7  | Body    | 1.11 | (0.79; 1.56) | 5.4E-01 |
| cg02603140 | WAC         | chr10 | Body    | 0.9  | (0.66; 1.25) | 5.4E-01 |
| cg23827695 | CPEB1       | chr15 | 1stExon | 0.91 | (0.66; 1.24) | 5.4E-01 |
| cg23827695 | CPEB1       | chr15 | Body    | 0.91 | (0.66; 1.24) | 5.4E-01 |
| cg23827695 | CPEB1       | chr15 | 5'UTR   | 0.91 | (0.66; 1.24) | 5.4E-01 |
| cg12590902 | ERI3        | chr1  | Body    | 0.89 | (0.62; 1.28) | 5.4E-01 |
| cg04971161 | FBXO34      | chr14 | 5'UTR   | 0.89 | (0.61; 1.29) | 5.4E-01 |
| cg00253171 | WWOX        | chr16 | Body    | 0.89 | (0.63; 1.28) | 5.4E-01 |
| cg13523718 | PTPRN2      | chr7  | Body    | 1.1  | (0.81; 1.51) | 5.4E-01 |
| cg03182745 | COL1A2      | chr7  | Body    | 0.89 | (0.62; 1.29) | 5.4E-01 |
| cg03182745 | COL1A2      | chr7  | ExonBnd | 0.89 | (0.62; 1.29) | 5.4E-01 |
| cg02533819 | ATF7        | chr12 | Body    | 1.2  | (0.68; 2.11) | 5.4E-01 |
| cg06468911 | PHACTR1     | chr6  | Body    | 0.69 | (0.21; 2.24) | 5.4E-01 |
| cg16979981 | FBXO11      | chr2  | 3'UTR   | 0.87 | (0.56; 1.35) | 5.4E-01 |
| cg09044928 | PTPRN2      | chr7  | Body    | 0.9  | (0.64; 1.27) | 5.4E-01 |
| cg05013730 | CNTNAP2     | chr7  | Body    | 1.13 | (0.76; 1.69) | 5.4E-01 |
| cg17364913 | PTPRN2      | chr7  | Body    | 1.1  | (0.82; 1.48) | 5.4E-01 |
| cg13052034 | SGIP1       | chr1  | TSS1500 | 0.91 | (0.67; 1.23) | 5.4E-01 |
| cg11130461 | ZBTB20      | chr3  | 5'UTR   | 1.1  | (0.82; 1.47) | 5.4E-01 |
| cg04177456 | PTPRN2      | chr7  | Body    | 0.9  | (0.65; 1.26) | 5.4E-01 |
| cg13550921 | CACNA1C-IT2 | chr12 | TSS200  | 0.9  | (0.65; 1.25) | 5.4E-01 |
| cg18795320 | ATF7IP      | chr12 | 5'UTR   | 0.89 | (0.63; 1.28) | 5.4E-01 |
| cg18795320 | ATF7IP      | chr12 | Body    | 0.89 | (0.63; 1.28) | 5.4E-01 |
| cg08246366 | PTPRN2      | chr7  | Body    | 1.11 | (0.8; 1.54)  | 5.4E-01 |
| cg05340866 | CNTNAP2     | chr7  | Body    | 0.92 | (0.7; 1.21)  | 5.4E-01 |
| cg07493562 | WWOX        | chr16 | Body    | 1.18 | (0.7; 1.99)  | 5.4E-01 |
| cg16954577 | TNFRSF11A   | chr18 | Body    | 1.1  | (0.81; 1.48) | 5.4E-01 |
| cg01916462 | DCUN1D4     | chr4  | Body    | 1.11 | (0.8; 1.54)  | 5.4E-01 |
| cg00869927 | SGIP1       | chr1  | Body    | 0.86 | (0.54; 1.38) | 5.4E-01 |
| cg26375836 | SMARCD3     | chr7  | TSS1500 | 0.91 | (0.68; 1.22) | 5.4E-01 |
| cg26375836 | SMARCD3     | chr7  | Body    | 0.91 | (0.68; 1.22) | 5.4E-01 |
| cg03860108 | CNTNAP2     | chr7  | Body    | 1.12 | (0.79; 1.58) | 5.4E-01 |
| cg18923228 | CREBBP      | chr16 | Body    | 0.84 | (0.47; 1.48) | 5.4E-01 |
| cg02243437 | SLC16A9     | chr10 | 1stExon | 1.11 | (0.79; 1.56) | 5.4E-01 |
| cg02243437 | SLC16A9     | chr10 | 5'UTR   | 1.11 | (0.79; 1.56) | 5.4E-01 |



|            |                 |       |         |      |              |         |
|------------|-----------------|-------|---------|------|--------------|---------|
| cg26554834 | <i>PTPRN2</i>   | chr7  | Body    | 1.11 | (0.8; 1.55)  | 5.4E-01 |
| cg26902323 | <i>RTN4</i>     | chr2  | TSS1500 | 1.1  | (0.81; 1.49) | 5.4E-01 |
| cg26902323 | <i>RTN4</i>     | chr2  | 1stExon | 1.1  | (0.81; 1.49) | 5.4E-01 |
| cg26902323 | <i>RTN4</i>     | chr2  | 5'UTR   | 1.1  | (0.81; 1.49) | 5.4E-01 |
| cg21530087 | <i>AKAP13</i>   | chr15 | TSS200  | 1.1  | (0.82; 1.48) | 5.4E-01 |
| cg08793976 | <i>TNRC18</i>   | chr7  | Body    | 1.14 | (0.75; 1.75) | 5.4E-01 |
| cg03054309 | <i>CDH13</i>    | chr16 | Body    | 1.11 | (0.79; 1.55) | 5.4E-01 |
| cg27103642 | <i>PTPRN2</i>   | chr7  | Body    | 0.9  | (0.65; 1.26) | 5.4E-01 |
| cg09293985 | <i>WVOX</i>     | chr16 | Body    | 1.12 | (0.78; 1.6)  | 5.4E-01 |
| cg03707604 | <i>CNTNAP2</i>  | chr7  | Body    | 1.16 | (0.73; 1.84) | 5.4E-01 |
| cg24173422 | <i>PTPRN2</i>   | chr7  | Body    | 1.11 | (0.8; 1.52)  | 5.4E-01 |
| cg04706867 | <i>CNTNAP2</i>  | chr7  | TSS1500 | 1.11 | (0.8; 1.53)  | 5.4E-01 |
| cg24507502 | <i>BRUNOL4</i>  | chr18 | 3'UTR   | 1.12 | (0.78; 1.62) | 5.4E-01 |
| cg16043144 | <i>CPEB1</i>    | chr15 | Body    | 1.14 | (0.75; 1.71) | 5.4E-01 |
| cg05736847 | <i>TNRC6C</i>   | chr17 | Body    | 0.9  | (0.64; 1.26) | 5.4E-01 |
| cg16183813 | <i>DACH1</i>    | chr13 | 5'UTR   | 0.89 | (0.62; 1.29) | 5.4E-01 |
| cg16183813 | <i>DACH1</i>    | chr13 | 1stExon | 0.89 | (0.62; 1.29) | 5.4E-01 |
| cg22052291 | <i>TNFRSF19</i> | chr13 | 5'UTR   | 0.88 | (0.59; 1.32) | 5.4E-01 |
| cg22052291 | <i>TNFRSF19</i> | chr13 | TSS1500 | 0.88 | (0.59; 1.32) | 5.4E-01 |
| cg10030458 | <i>SMARCD3</i>  | chr7  | Body    | 1.1  | (0.81; 1.48) | 5.4E-01 |
| cg26045166 | <i>CSMD2</i>    | chr1  | Body    | 1.11 | (0.79; 1.57) | 5.4E-01 |
| cg18779092 | <i>NDUFA9</i>   | chr12 | TSS1500 | 0.9  | (0.64; 1.26) | 5.4E-01 |
| cg18939478 | <i>CACNA1C</i>  | chr12 | Body    | 1.11 | (0.8; 1.54)  | 5.4E-01 |
| cg15661240 | <i>TNRC6C</i>   | chr17 | Body    | 1.1  | (0.8; 1.52)  | 5.4E-01 |
| cg11268190 | <i>TNFRSF1A</i> | chr12 | Body    | 0.9  | (0.64; 1.27) | 5.4E-01 |
| cg08237117 | <i>CHFR</i>     | chr12 | Body    | 1.11 | (0.8; 1.54)  | 5.4E-01 |
| cg20494215 | <i>SUGCT</i>    | chr7  | Body    | 0.91 | (0.67; 1.23) | 5.4E-01 |
| cg06878729 | <i>CSMD2</i>    | chr1  | Body    | 0.91 | (0.66; 1.24) | 5.4E-01 |
| cg17221275 | <i>TNRC6B</i>   | chr22 | Body    | 1.12 | (0.77; 1.63) | 5.4E-01 |
| cg09225840 | <i>TNFRSF1B</i> | chr1  | Body    | 0.88 | (0.59; 1.32) | 5.4E-01 |
| cg24706315 | <i>MTCL1</i>    | chr18 | Body    | 1.11 | (0.79; 1.56) | 5.4E-01 |
| cg02995459 | <i>NOL4</i>     | chr18 | 5'UTR   | 1.12 | (0.78; 1.62) | 5.4E-01 |
| cg02995459 | <i>NOL4</i>     | chr18 | Body    | 1.12 | (0.78; 1.62) | 5.4E-01 |
| cg04023548 | <i>TDRP</i>     | chr8  | TSS1500 | 1.11 | (0.79; 1.57) | 5.4E-01 |
| cg04023548 | <i>TDRP</i>     | chr8  | 5'UTR   | 1.11 | (0.79; 1.57) | 5.4E-01 |
| cg12907305 | <i>ZBTB20</i>   | chr3  | Body    | 1.13 | (0.77; 1.66) | 5.4E-01 |
| cg12907305 | <i>ZBTB20</i>   | chr3  | 5'UTR   | 1.13 | (0.77; 1.66) | 5.4E-01 |
| cg09980118 | <i>GNA12</i>    | chr7  | Body    | 0.91 | (0.67; 1.24) | 5.4E-01 |
| cg09980118 | <i>GNA12</i>    | chr7  | TSS1500 | 0.91 | (0.67; 1.24) | 5.4E-01 |
| cg23418083 | <i>CREBBP</i>   | chr16 | Body    | 0.89 | (0.6; 1.31)  | 5.4E-01 |
| cg10941356 | <i>PTPRS</i>    | chr19 | Body    | 0.88 | (0.58; 1.33) | 5.4E-01 |
| cg02953970 | <i>FBXO11</i>   | chr2  | Body    | 1.14 | (0.74; 1.76) | 5.4E-01 |
| cg26251202 | <i>CEP350</i>   | chr1  | Body    | 1.11 | (0.79; 1.56) | 5.4E-01 |
| cg26639747 | <i>PTPRN2</i>   | chr7  | Body    | 1.2  | (0.67; 2.14) | 5.4E-01 |
| cg12841881 | <i>ATP6V0C</i>  | chr16 | TSS1500 | 1.12 | (0.78; 1.61) | 5.4E-01 |
| cg12841881 | <i>ATP6V0C</i>  | chr16 | TSS200  | 1.12 | (0.78; 1.61) | 5.4E-01 |
| cg11895615 | <i>CACNA1C</i>  | chr12 | Body    | 0.89 | (0.61; 1.3)  | 5.4E-01 |
| cg01436550 | <i>TNRC6A</i>   | chr16 | Body    | 1.11 | (0.79; 1.58) | 5.4E-01 |
| cg05353134 | <i>TNRC6A</i>   | chr16 | Body    | 1.12 | (0.78; 1.6)  | 5.4E-01 |
| cg09115843 | <i>TNFRSF19</i> | chr13 | 5'UTR   | 0.88 | (0.59; 1.32) | 5.4E-01 |
| cg23072051 | <i>PEX14</i>    | chr1  | Body    | 0.9  | (0.64; 1.27) | 5.4E-01 |
| cg27454370 | <i>BARX1</i>    | chr9  | TSS1500 | 0.9  | (0.63; 1.28) | 5.4E-01 |
| cg01814572 | <i>TENM2</i>    | chr5  | Body    | 1.11 | (0.79; 1.57) | 5.4E-01 |
| cg03805029 | <i>DMXL2</i>    | chr15 | Body    | 1.11 | (0.79; 1.58) | 5.4E-01 |
| cg20190456 | <i>RTN4RL1</i>  | chr17 | Body    | 1.14 | (0.75; 1.71) | 5.4E-01 |
| cg18686797 | <i>ELAVL4</i>   | chr1  | TSS1500 | 1.11 | (0.8; 1.53)  | 5.4E-01 |
| cg18686797 | <i>ELAVL4</i>   | chr1  | Body    | 1.11 | (0.8; 1.53)  | 5.4E-01 |
| cg23690355 | <i>CTDSPL2</i>  | chr15 | TSS1500 | 1.11 | (0.8; 1.54)  | 5.4E-01 |
| cg15187151 | <i>PTPRN2</i>   | chr7  | Body    | 1.1  | (0.8; 1.52)  | 5.4E-01 |
| cg24727133 | <i>CHFR</i>     | chr12 | TSS1500 | 0.91 | (0.66; 1.24) | 5.4E-01 |
| cg24824703 | <i>GNA12</i>    | chr7  | Body    | 1.1  | (0.81; 1.48) | 5.4E-01 |



|            |                  |       |         |      |              |         |
|------------|------------------|-------|---------|------|--------------|---------|
| cg03361346 | <i>TNRC18</i>    | chr7  | Body    | 1.11 | (0.8; 1.54)  | 5.4E-01 |
| cg09127540 | <i>PTPRN2</i>    | chr7  | Body    | 1.11 | (0.8; 1.53)  | 5.4E-01 |
| cg17539487 | <i>TNFRSF10B</i> | chr8  | Body    | 1.1  | (0.82; 1.47) | 5.4E-01 |
| cg02770061 | <i>PTPRN2</i>    | chr7  | Body    | 0.91 | (0.68; 1.23) | 5.4E-01 |
| cg14706661 | <i>CUX2</i>      | chr12 | 3'UTR   | 1.12 | (0.78; 1.59) | 5.4E-01 |
| cg25645732 | <i>CNTNAP2</i>   | chr7  | TSS1500 | 1.1  | (0.81; 1.5)  | 5.4E-01 |
| cg06734250 | <i>NOL4</i>      | chr18 | Body    | 0.9  | (0.64; 1.26) | 5.4E-01 |
| cg10257673 | <i>PTPRN2</i>    | chr7  | Body    | 1.14 | (0.74; 1.76) | 5.4E-01 |
| cg23004985 | <i>PDE8A</i>     | chr15 | 3'UTR   | 0.88 | (0.58; 1.33) | 5.4E-01 |
| cg03252313 | <i>CNTNAP2</i>   | chr7  | 3'UTR   | 0.91 | (0.67; 1.23) | 5.4E-01 |
| cg05689121 | <i>TNRC6A</i>    | chr16 | TSS200  | 1.11 | (0.79; 1.56) | 5.5E-01 |
| cg25212381 | <i>ZNF704</i>    | chr8  | TSS200  | 1.12 | (0.78; 1.62) | 5.5E-01 |
| cg10870815 | <i>CACNA1C</i>   | chr12 | Body    | 0.89 | (0.6; 1.31)  | 5.5E-01 |
| cg21235329 | <i>ELAVL4</i>    | chr1  | TSS1500 | 0.89 | (0.62; 1.29) | 5.5E-01 |
| cg21235329 | <i>ELAVL4</i>    | chr1  | Body    | 0.89 | (0.62; 1.29) | 5.5E-01 |
| cg10347555 | <i>ATP6V0C</i>   | chr16 | 3'UTR   | 0.9  | (0.65; 1.25) | 5.5E-01 |
| cg13287247 | <i>CCDC80</i>    | chr3  | 5'UTR   | 0.88 | (0.58; 1.34) | 5.5E-01 |
| cg13287247 | <i>CCDC80</i>    | chr3  | 1stExon | 0.88 | (0.58; 1.34) | 5.5E-01 |
| cg20222519 | <i>UBE2E2</i>    | chr3  | 5'UTR   | 1.13 | (0.76; 1.7)  | 5.5E-01 |
| cg09935228 | <i>ZNF704</i>    | chr8  | Body    | 0.9  | (0.65; 1.26) | 5.5E-01 |
| cg17460558 | <i>FBXO31</i>    | chr16 | TSS200  | 0.91 | (0.68; 1.23) | 5.5E-01 |
| cg17460558 | <i>FBXO31</i>    | chr16 | 5'UTR   | 0.91 | (0.68; 1.23) | 5.5E-01 |
| cg20674254 | <i>CDH13</i>     | chr16 | 5'UTR   | 0.91 | (0.68; 1.23) | 5.5E-01 |
| cg20674254 | <i>CDH13</i>     | chr16 | Body    | 0.91 | (0.68; 1.23) | 5.5E-01 |
| cg13719771 | <i>NDUFA9</i>    | chr12 | Body    | 0.9  | (0.64; 1.26) | 5.5E-01 |
| cg16235197 | <i>CUX2</i>      | chr12 | Body    | 0.9  | (0.64; 1.27) | 5.5E-01 |
| cg17134221 | <i>PTPRN2</i>    | chr7  | Body    | 1.09 | (0.82; 1.46) | 5.5E-01 |
| cg10205895 | <i>DACH1</i>     | chr13 | TSS1500 | 1.2  | (0.66; 2.17) | 5.5E-01 |
| cg24544431 | <i>TNR</i>       | chr1  | TSS1500 | 1.1  | (0.8; 1.53)  | 5.5E-01 |
| cg00826997 | <i>CNTNAP2</i>   | chr7  | Body    | 0.9  | (0.65; 1.25) | 5.5E-01 |
| cg01949902 | <i>TNRC6B</i>    | chr22 | TSS1500 | 1.09 | (0.82; 1.45) | 5.5E-01 |
| cg05119831 | <i>PTPRN2</i>    | chr7  | Body    | 0.9  | (0.65; 1.26) | 5.5E-01 |
| cg18540529 | <i>PTPRN2</i>    | chr7  | Body    | 1.1  | (0.8; 1.52)  | 5.5E-01 |
| cg14710853 | <i>TNRC6B</i>    | chr22 | 5'UTR   | 1.12 | (0.78; 1.6)  | 5.5E-01 |
| cg23598360 | <i>TNRC18</i>    | chr7  | Body    | 1.1  | (0.8; 1.52)  | 5.5E-01 |
| cg14528596 | <i>CHCHD6</i>    | chr3  | Body    | 1.11 | (0.79; 1.55) | 5.5E-01 |
| cg06705947 | <i>CUX2</i>      | chr12 | Body    | 1.11 | (0.79; 1.56) | 5.5E-01 |
| cg07547996 | <i>CTNND2</i>    | chr5  | Body    | 1.12 | (0.78; 1.6)  | 5.5E-01 |
| cg07547996 | <i>CTNND2</i>    | chr5  | 5'UTR   | 1.12 | (0.78; 1.6)  | 5.5E-01 |
| cg12901835 | <i>GNA12</i>     | chr7  | Body    | 1.12 | (0.77; 1.64) | 5.5E-01 |
| cg25375656 | <i>DACH1</i>     | chr13 | Body    | 0.9  | (0.63; 1.28) | 5.5E-01 |
| cg12434889 | <i>PTPRN2</i>    | chr7  | Body    | 1.09 | (0.81; 1.47) | 5.5E-01 |
| cg14295590 | <i>TNRC18</i>    | chr7  | Body    | 1.11 | (0.78; 1.59) | 5.5E-01 |
| cg23799943 | <i>CUX2</i>      | chr12 | Body    | 1.12 | (0.77; 1.65) | 5.5E-01 |
| cg22289432 | <i>PTPRN2</i>    | chr7  | Body    | 1.1  | (0.8; 1.53)  | 5.5E-01 |
| cg16080620 | <i>CDH13</i>     | chr16 | Body    | 0.9  | (0.65; 1.26) | 5.5E-01 |
| cg05101821 | <i>PTPRN2</i>    | chr7  | Body    | 0.9  | (0.65; 1.26) | 5.5E-01 |
| cg02544392 | <i>SUGCT</i>     | chr7  | Body    | 0.9  | (0.64; 1.27) | 5.5E-01 |
| cg01388620 | <i>PTPRN2</i>    | chr7  | Body    | 0.9  | (0.64; 1.26) | 5.5E-01 |
| cg14091258 | <i>PTPRN2</i>    | chr7  | Body    | 1.11 | (0.79; 1.55) | 5.5E-01 |
| cg05874166 | <i>PTPRN2</i>    | chr7  | Body    | 0.91 | (0.67; 1.24) | 5.5E-01 |
| cg15315656 | <i>MTCL1</i>     | chr18 | Body    | 1.09 | (0.82; 1.44) | 5.5E-01 |
| cg10995873 | <i>ZBTB20</i>    | chr3  | 5'UTR   | 0.89 | (0.62; 1.29) | 5.5E-01 |
| cg10995873 | <i>ZBTB20</i>    | chr3  | TSS200  | 0.89 | (0.62; 1.29) | 5.5E-01 |
| cg23168425 | <i>PTPRN2</i>    | chr7  | Body    | 0.91 | (0.67; 1.23) | 5.5E-01 |
| cg01957318 | <i>WWOX</i>      | chr16 | Body    | 1.11 | (0.79; 1.56) | 5.5E-01 |
| cg17809181 | <i>PTPRN2</i>    | chr7  | Body    | 1.12 | (0.77; 1.65) | 5.5E-01 |
| cg24351167 | <i>PHACTR1</i>   | chr6  | Body    | 1.11 | (0.79; 1.55) | 5.5E-01 |
| cg22445008 | <i>TNFRSF19</i>  | chr13 | 5'UTR   | 0.9  | (0.65; 1.26) | 5.5E-01 |
| cg22445008 | <i>TNFRSF19</i>  | chr13 | Body    | 0.9  | (0.65; 1.26) | 5.5E-01 |
| cg20381140 | <i>CHCHD6</i>    | chr3  | Body    | 1.11 | (0.79; 1.57) | 5.5E-01 |



|                |           |       |         |      |              |         |
|----------------|-----------|-------|---------|------|--------------|---------|
| cg08454485     | ALCAM     | chr3  | 5'UTR   | 0.89 | (0.6; 1.31)  | 5.5E-01 |
| cg08454485     | ALCAM     | chr3  | 1stExon | 0.89 | (0.6; 1.31)  | 5.5E-01 |
| cg12545993     | TNFRSF11B | chr8  | TSS1500 | 0.9  | (0.64; 1.26) | 5.5E-01 |
| cg27057461     | PTPRN2    | chr7  | Body    | 1.12 | (0.78; 1.59) | 5.5E-01 |
| cg24430782     | CACNA1C   | chr12 | Body    | 0.88 | (0.58; 1.33) | 5.5E-01 |
| cg21944557     | CEP350    | chr1  | TSS200  | 1.13 | (0.76; 1.69) | 5.5E-01 |
| cg22097004     | WWOX      | chr16 | Body    | 1.1  | (0.81; 1.5)  | 5.5E-01 |
| cg20062057     | NRXN1     | chr2  | Body    | 1.11 | (0.79; 1.56) | 5.5E-01 |
| cg22515654     | PEX14     | chr1  | Body    | 0.86 | (0.52; 1.42) | 5.5E-01 |
| cg22856646     | CDH13     | chr16 | Body    | 0.88 | (0.57; 1.34) | 5.5E-01 |
| cg04907505     | RAP1B     | chr12 | TSS1500 | 1.11 | (0.79; 1.57) | 5.5E-01 |
| cg20536469     | NRXN1     | chr2  | Body    | 1.11 | (0.79; 1.55) | 5.5E-01 |
| cg15524101     | RTN4RL1   | chr17 | 3'UTR   | 1.1  | (0.8; 1.53)  | 5.5E-01 |
| cg12179635     | TNR       | chr1  | 5'UTR   | 1.1  | (0.8; 1.5)   | 5.5E-01 |
| cg11400774     | MEX3A     | chr1  | Body    | 0.88 | (0.58; 1.34) | 5.5E-01 |
| cg16484093     | RTN4RL1   | chr17 | Body    | 0.84 | (0.48; 1.47) | 5.5E-01 |
| cg04114386     | ATP8A1    | chr4  | Body    | 1.11 | (0.79; 1.54) | 5.5E-01 |
| cg26832509     | CHFR      | chr12 | TSS1500 | 1.1  | (0.81; 1.48) | 5.5E-01 |
| cg09465362     | PTPRN2    | chr7  | Body    | 0.89 | (0.62; 1.3)  | 5.5E-01 |
| cg19350216     | PTPRN2    | chr7  | Body    | 0.9  | (0.63; 1.28) | 5.5E-01 |
| cg02597575     | RTN4RL1   | chr17 | Body    | 0.9  | (0.65; 1.26) | 5.5E-01 |
| cg19945202     | CACNA1C   | chr12 | Body    | 0.91 | (0.67; 1.24) | 5.5E-01 |
| cg23602909     | PTPRN2    | chr7  | Body    | 0.92 | (0.69; 1.22) | 5.5E-01 |
| cg27583677     | RNU5E-1   | chr5  | Body    | 1.1  | (0.8; 1.51)  | 5.5E-01 |
| cg23234498     | ELAVL4    | chr1  | TSS1500 | 0.89 | (0.6; 1.32)  | 5.5E-01 |
| cg23234498     | ELAVL4    | chr1  | Body    | 0.89 | (0.6; 1.32)  | 5.5E-01 |
| cg17314538     | MTNR1A    | chr4  | TSS1500 | 0.88 | (0.57; 1.35) | 5.5E-01 |
| cg14340196     | COL1A2    | chr7  | Body    | 0.91 | (0.66; 1.25) | 5.5E-01 |
| cg13372934     | WWOX      | chr16 | Body    | 1.18 | (0.69; 2.02) | 5.5E-01 |
| cg15110800     | CSMD2     | chr1  | Body    | 1.11 | (0.78; 1.58) | 5.5E-01 |
| cg10178127     | ZBTB20    | chr3  | 5'UTR   | 1.14 | (0.74; 1.77) | 5.5E-01 |
| cg15539697     | ELAVL4    | chr1  | TSS1500 | 1.11 | (0.79; 1.54) | 5.5E-01 |
| cg11161111     | PTPRN2    | chr7  | Body    | 0.91 | (0.66; 1.25) | 5.5E-01 |
| cg00718355     | CTDSPL    | chr3  | Body    | 1.15 | (0.73; 1.82) | 5.5E-01 |
| cg10580397     | UBE2E2    | chr3  | Body    | 0.88 | (0.58; 1.34) | 5.5E-01 |
| cg06324554     | PTPRN2    | chr7  | Body    | 1.09 | (0.82; 1.46) | 5.5E-01 |
| cg05878337     | CTNND2    | chr5  | Body    | 0.88 | (0.56; 1.36) | 5.5E-01 |
| cg23328938     | TNRC6B    | chr22 | 5'UTR   | 1.15 | (0.73; 1.82) | 5.5E-01 |
| cg20664017     | FBXO34    | chr14 | 1stExon | 1.09 | (0.82; 1.46) | 5.5E-01 |
| cg20664017     | FBXO34    | chr14 | 5'UTR   | 1.09 | (0.82; 1.46) | 5.5E-01 |
| cg24844694     | MEIS2     | chr15 | Body    | 1.12 | (0.77; 1.64) | 5.5E-01 |
| cg11991903     | PTPRN2    | chr7  | Body    | 0.92 | (0.68; 1.23) | 5.5E-01 |
| cg27118178     | NOL4L     | chr20 | Body    | 0.89 | (0.62; 1.3)  | 5.5E-01 |
| cg20941737     | ZBTB20    | chr3  | 5'UTR   | 1.13 | (0.76; 1.69) | 5.5E-01 |
| cg20941737     | ZBTB20    | chr3  | 1stExon | 1.13 | (0.76; 1.69) | 5.5E-01 |
| cg24042017     | WWOX      | chr16 | Body    | 1.11 | (0.79; 1.56) | 5.5E-01 |
| cg25463381     | CHFR      | chr12 | TSS200  | 0.91 | (0.66; 1.25) | 5.5E-01 |
| cg02685365     | CACNA1C   | chr12 | Body    | 0.9  | (0.62; 1.29) | 5.5E-01 |
| cg23937224     | CUX2      | chr12 | Body    | 0.9  | (0.64; 1.27) | 5.5E-01 |
| cg08336070     | FBXO38    | chr5  | TSS200  | 0.91 | (0.65; 1.26) | 5.6E-01 |
| ch.11.1111744F | ZFP91     | chr11 | Body    | 0.91 | (0.67; 1.24) | 5.6E-01 |
| cg16908223     | PTPRU     | chr1  | Body    | 0.83 | (0.44; 1.55) | 5.6E-01 |
| cg17530002     | PTPRN2    | chr7  | Body    | 1.11 | (0.78; 1.58) | 5.6E-01 |
| cg06480636     | PTPRN2    | chr7  | Body    | 0.9  | (0.65; 1.26) | 5.6E-01 |
| cg25891212     | PTPRN2    | chr7  | Body    | 0.91 | (0.67; 1.24) | 5.6E-01 |
| cg13607161     | CTNND2    | chr5  | Body    | 0.89 | (0.61; 1.3)  | 5.6E-01 |
| cg20289609     | MEX3A     | chr1  | TSS200  | 1.1  | (0.8; 1.5)   | 5.6E-01 |
| cg03721291     | RECQL5    | chr17 | Body    | 0.82 | (0.43; 1.57) | 5.6E-01 |
| cg26561623     | RECQL5    | chr17 | 1stExon | 1.1  | (0.79; 1.53) | 5.6E-01 |
| cg26561623     | RECQL5    | chr17 | 5'UTR   | 1.1  | (0.79; 1.53) | 5.6E-01 |
| cg26676413     | TAOK3     | chr12 | Body    | 0.86 | (0.53; 1.41) | 5.6E-01 |



|            |           |       |         |      |              |         |
|------------|-----------|-------|---------|------|--------------|---------|
| cg16245240 | CACNA1C   | chr12 | Body    | 0.91 | (0.66; 1.26) | 5.6E-01 |
| cg09466698 | WWOX      | chr16 | Body    | 1.09 | (0.82; 1.46) | 5.6E-01 |
| cg22249754 | TNRC18    | chr7  | Body    | 1.1  | (0.8; 1.51)  | 5.6E-01 |
| cg17749072 | WAC       | chr10 | TSS200  | 0.92 | (0.68; 1.23) | 5.6E-01 |
| cg17749072 | WAC       | chr10 | Body    | 0.92 | (0.68; 1.23) | 5.6E-01 |
| cg14637685 | CACNA1C   | chr12 | Body    | 1.11 | (0.78; 1.57) | 5.6E-01 |
| cg21800127 | TNRC6B    | chr22 | 5'UTR   | 1.11 | (0.78; 1.59) | 5.6E-01 |
| cg08977371 | CDH13     | chr16 | TSS200  | 1.15 | (0.73; 1.8)  | 5.6E-01 |
| cg13132219 | CDH11     | chr16 | Body    | 0.91 | (0.66; 1.25) | 5.6E-01 |
| cg13867915 | ARID1A    | chr1  | Body    | 1.13 | (0.74; 1.73) | 5.6E-01 |
| cg26396535 | MEX3A     | chr1  | Body    | 1.1  | (0.8; 1.5)   | 5.6E-01 |
| cg02865101 | PTPRN2    | chr7  | Body    | 0.91 | (0.67; 1.24) | 5.6E-01 |
| cg11642382 | CNTNAP2   | chr7  | TSS1500 | 0.9  | (0.63; 1.28) | 5.6E-01 |
| cg11629337 | CEP350    | chr1  | Body    | 1.12 | (0.77; 1.63) | 5.6E-01 |
| cg24993062 | NOL4L     | chr20 | Body    | 1.2  | (0.65; 2.23) | 5.6E-01 |
| cg04207549 | RTN4RL1   | chr17 | Body    | 0.88 | (0.58; 1.35) | 5.6E-01 |
| cg03014997 | PTPRN2    | chr7  | Body    | 1.11 | (0.79; 1.54) | 5.6E-01 |
| cg04743758 | RTN4RL1   | chr17 | Body    | 0.89 | (0.61; 1.31) | 5.6E-01 |
| cg06050341 | FBXO32    | chr8  | Body    | 0.88 | (0.56; 1.36) | 5.6E-01 |
| cg04783764 | FBXO36    | chr2  | Body    | 0.89 | (0.6; 1.32)  | 5.6E-01 |
| cg05686511 | PTPRN2    | chr7  | Body    | 0.9  | (0.63; 1.28) | 5.6E-01 |
| cg03712278 | TENM2     | chr5  | Body    | 0.91 | (0.67; 1.24) | 5.6E-01 |
| cg10090116 | RECQL5    | chr17 | Body    | 0.86 | (0.51; 1.44) | 5.6E-01 |
| cg26286685 | DMXL2     | chr15 | Body    | 1.12 | (0.77; 1.61) | 5.6E-01 |
| cg09518219 | TNRC18    | chr7  | Body    | 0.91 | (0.66; 1.25) | 5.6E-01 |
| cg27448110 | PTPRN2    | chr7  | Body    | 0.87 | (0.53; 1.41) | 5.6E-01 |
| cg11592503 | CNTNAP2   | chr7  | TSS200  | 0.88 | (0.58; 1.35) | 5.6E-01 |
| cg07619953 | TNFRSF11A | chr18 | TSS1500 | 0.85 | (0.49; 1.47) | 5.6E-01 |
| cg04269327 | WWOX      | chr16 | Body    | 0.9  | (0.65; 1.27) | 5.6E-01 |
| cg10808406 | CTNND2    | chr5  | Body    | 1.1  | (0.81; 1.49) | 5.6E-01 |
| cg18387198 | PTPRN2    | chr7  | Body    | 0.92 | (0.7; 1.21)  | 5.6E-01 |
| cg06409756 | ZBTB20    | chr3  | Body    | 0.91 | (0.66; 1.25) | 5.6E-01 |
| cg06409756 | ZBTB20    | chr3  | 5'UTR   | 0.91 | (0.66; 1.25) | 5.6E-01 |
| cg11409060 | ATF7IP    | chr12 | TSS200  | 1.13 | (0.74; 1.73) | 5.6E-01 |
| cg04232181 | CDH13     | chr16 | Body    | 1.11 | (0.78; 1.57) | 5.6E-01 |
| cg21748317 | PTPRN2    | chr7  | Body    | 0.92 | (0.68; 1.23) | 5.6E-01 |
| cg17847474 | WWOX      | chr16 | Body    | 1.25 | (0.59; 2.62) | 5.6E-01 |
| cg21600678 | CTDSPL2   | chr15 | Body    | 1.13 | (0.74; 1.73) | 5.6E-01 |
| cg21600678 | CTDSPL2   | chr15 | ExonBnd | 1.13 | (0.74; 1.73) | 5.6E-01 |
| cg03028536 | CUX2      | chr12 | Body    | 1.11 | (0.77; 1.61) | 5.6E-01 |
| cg13691570 | PTPRN2    | chr7  | Body    | 1.1  | (0.8; 1.5)   | 5.6E-01 |
| cg18032297 | BRUNOL4   | chr18 | Body    | 0.9  | (0.64; 1.27) | 5.6E-01 |
| cg17154605 | ERI3      | chr1  | TSS1500 | 0.88 | (0.58; 1.35) | 5.6E-01 |
| cg25310676 | PEX14     | chr1  | Body    | 0.85 | (0.48; 1.49) | 5.6E-01 |
| cg00472324 | MEX3A     | chr1  | TSS1500 | 0.91 | (0.66; 1.25) | 5.6E-01 |
| cg00765127 | TNFRSF10C | chr8  | TSS1500 | 0.9  | (0.64; 1.28) | 5.6E-01 |
| cg27329780 | CNTNAP2   | chr7  | Body    | 1.1  | (0.8; 1.52)  | 5.6E-01 |
| cg14571092 | RTN4RL1   | chr17 | Body    | 0.9  | (0.63; 1.29) | 5.6E-01 |
| cg07207813 | WWOX      | chr16 | Body    | 0.88 | (0.57; 1.36) | 5.6E-01 |
| cg07912513 | WAC       | chr10 | Body    | 0.86 | (0.51; 1.45) | 5.6E-01 |
| cg15080590 | PTPRN2    | chr7  | Body    | 0.91 | (0.65; 1.26) | 5.6E-01 |
| cg08846221 | PEX14     | chr1  | Body    | 1.09 | (0.82; 1.44) | 5.6E-01 |
| cg13457415 | PTPRN2    | chr7  | Body    | 0.88 | (0.57; 1.35) | 5.6E-01 |
| cg00703299 | FBXO34    | chr14 | 5'UTR   | 1.16 | (0.7; 1.92)  | 5.6E-01 |
| cg24459140 | PTPRS     | chr19 | Body    | 1.11 | (0.77; 1.61) | 5.6E-01 |
| cg09714852 | PTPRN2    | chr7  | Body    | 0.9  | (0.62; 1.3)  | 5.6E-01 |
| cg25906096 | ZBTB20    | chr3  | TSS1500 | 0.9  | (0.62; 1.3)  | 5.6E-01 |
| cg25906096 | ZBTB20    | chr3  | Body    | 0.9  | (0.62; 1.3)  | 5.6E-01 |
| cg25906096 | ZBTB20    | chr3  | 5'UTR   | 0.9  | (0.62; 1.3)  | 5.6E-01 |
| cg00442814 | ZNF704    | chr8  | 5'UTR   | 0.9  | (0.63; 1.28) | 5.6E-01 |
| cg12245245 | TAOK3     | chr12 | Body    | 0.92 | (0.68; 1.23) | 5.6E-01 |



|            |          |       |         |      |              |         |
|------------|----------|-------|---------|------|--------------|---------|
| cg26219497 | AKAP13   | chr15 | Body    | 1.11 | (0.78; 1.57) | 5.6E-01 |
| cg13150854 | CSMD2    | chr1  | Body    | 1.2  | (0.65; 2.23) | 5.6E-01 |
| cg14918650 | COL1A2   | chr7  | Body    | 0.91 | (0.65; 1.27) | 5.6E-01 |
| cg27324826 | NOL4     | chr18 | Body    | 1.1  | (0.79; 1.55) | 5.7E-01 |
| cg04757389 | PTPRS    | chr19 | Body    | 1.09 | (0.81; 1.49) | 5.7E-01 |
| cg06892332 | PTPRN2   | chr7  | Body    | 1.12 | (0.76; 1.64) | 5.7E-01 |
| cg27029144 | CSMD2    | chr1  | ExonBnd | 0.87 | (0.55; 1.39) | 5.7E-01 |
| cg27029144 | CSMD2    | chr1  | Body    | 0.87 | (0.55; 1.39) | 5.7E-01 |
| cg08747377 | CDH13    | chr16 | 1stExon | 0.87 | (0.55; 1.38) | 5.7E-01 |
| cg08747377 | CDH13    | chr16 | 5'UTR   | 0.87 | (0.55; 1.38) | 5.7E-01 |
| cg00015791 | NOL4     | chr18 | 5'UTR   | 0.89 | (0.59; 1.34) | 5.7E-01 |
| cg00015791 | NOL4     | chr18 | Body    | 0.89 | (0.59; 1.34) | 5.7E-01 |
| cg00015791 | NOL4     | chr18 | 1stExon | 0.89 | (0.59; 1.34) | 5.7E-01 |
| cg08742262 | PTPRN2   | chr7  | Body    | 1.1  | (0.8; 1.49)  | 5.7E-01 |
| cg06225605 | CNTNAP2  | chr7  | Body    | 1.1  | (0.8; 1.52)  | 5.7E-01 |
| cg08685426 | AKAP13   | chr15 | Body    | 0.88 | (0.57; 1.37) | 5.7E-01 |
| cg07350262 | AKAP13   | chr15 | Body    | 1.15 | (0.72; 1.84) | 5.7E-01 |
| cg17128505 | PTPRN2   | chr7  | Body    | 1.12 | (0.77; 1.63) | 5.7E-01 |
| cg27032636 | PTPRN2   | chr7  | Body    | 0.91 | (0.65; 1.26) | 5.7E-01 |
| cg18750645 | CHD6     | chr20 | Body    | 1.09 | (0.81; 1.48) | 5.7E-01 |
| cg24500428 | PTPRN2   | chr7  | Body    | 1.09 | (0.81; 1.48) | 5.7E-01 |
| cg00381086 | WAC      | chr10 | Body    | 1.1  | (0.8; 1.5)   | 5.7E-01 |
| cg00381086 | WAC      | chr10 | 5'UTR   | 1.1  | (0.8; 1.5)   | 5.7E-01 |
| cg09704544 | PDE8A    | chr15 | Body    | 1.22 | (0.62; 2.41) | 5.7E-01 |
| cg11908041 | PHACTR1  | chr6  | Body    | 1.13 | (0.74; 1.72) | 5.7E-01 |
| cg27139244 | SGIP1    | chr1  | Body    | 0.9  | (0.64; 1.28) | 5.7E-01 |
| cg21142977 | CEP350   | chr1  | 5'UTR   | 1.09 | (0.82; 1.45) | 5.7E-01 |
| cg12323477 | WWOX     | chr16 | Body    | 0.92 | (0.69; 1.22) | 5.7E-01 |
| cg05876425 | PTPRN2   | chr7  | Body    | 1.09 | (0.8; 1.49)  | 5.7E-01 |
| cg26738655 | CHD6     | chr20 | 5'UTR   | 1.09 | (0.81; 1.46) | 5.7E-01 |
| cg03568556 | PTPRS    | chr19 | 5'UTR   | 1.09 | (0.81; 1.47) | 5.7E-01 |
| cg16253326 | CHCHD6   | chr3  | Body    | 1.13 | (0.75; 1.7)  | 5.7E-01 |
| cg03722044 | CREBBP   | chr16 | Body    | 0.91 | (0.67; 1.25) | 5.7E-01 |
| cg26312950 | TNRC18   | chr7  | Body    | 0.9  | (0.64; 1.28) | 5.7E-01 |
| cg16422272 | TAOK3    | chr12 | Body    | 0.9  | (0.64; 1.28) | 5.7E-01 |
| cg11801676 | TNFRSF1B | chr1  | Body    | 0.89 | (0.59; 1.34) | 5.7E-01 |
| cg06618322 | AKAP13   | chr15 | TSS200  | 0.91 | (0.67; 1.25) | 5.7E-01 |
| cg25366408 | ATF7     | chr12 | 3'UTR   | 1.17 | (0.68; 2.01) | 5.7E-01 |
| cg25366408 | ATF7     | chr12 | Body    | 1.17 | (0.68; 2.01) | 5.7E-01 |
| cg27273791 | ZBTB20   | chr3  | Body    | 1.11 | (0.77; 1.61) | 5.7E-01 |
| cg27273791 | ZBTB20   | chr3  | 5'UTR   | 1.11 | (0.77; 1.61) | 5.7E-01 |
| cg20882260 | CACNA1C  | chr12 | Body    | 1.15 | (0.71; 1.88) | 5.7E-01 |
| cg23983635 | PTPRN2   | chr7  | Body    | 1.09 | (0.82; 1.45) | 5.7E-01 |
| cg01858550 | FBXO31   | chr16 | Body    | 1.11 | (0.77; 1.6)  | 5.7E-01 |
| cg01858550 | FBXO31   | chr16 | 5'UTR   | 1.11 | (0.77; 1.6)  | 5.7E-01 |
| cg22804770 | CACNA1C  | chr12 | Body    | 1.13 | (0.73; 1.75) | 5.7E-01 |
| cg04066596 | FBXO36   | chr2  | Body    | 0.8  | (0.37; 1.72) | 5.7E-01 |
| cg05161295 | TNRC18   | chr7  | ExonBnd | 1.11 | (0.78; 1.58) | 5.7E-01 |
| cg05161295 | TNRC18   | chr7  | Body    | 1.11 | (0.78; 1.58) | 5.7E-01 |
| cg14423557 | BRUNOL4  | chr18 | TSS200  | 0.89 | (0.6; 1.33)  | 5.7E-01 |
| cg22821606 | C11orf67 | chr11 | TSS200  | 1.09 | (0.81; 1.48) | 5.7E-01 |
| cg10752869 | MEIS2    | chr15 | 5'UTR   | 0.91 | (0.64; 1.28) | 5.7E-01 |
| cg10752869 | MEIS2    | chr15 | 1stExon | 0.91 | (0.64; 1.28) | 5.7E-01 |
| cg10752869 | MEIS2    | chr15 | Body    | 0.91 | (0.64; 1.28) | 5.7E-01 |
| cg10752869 | MEIS2    | chr15 | TSS1500 | 0.91 | (0.64; 1.28) | 5.7E-01 |
| cg08992565 | ACVR2A   | chr2  | 5'UTR   | 1.15 | (0.7; 1.89)  | 5.7E-01 |
| cg08992565 | ACVR2A   | chr2  | Body    | 1.15 | (0.7; 1.89)  | 5.7E-01 |
| cg08575843 | FBXO38   | chr5  | 5'UTR   | 0.89 | (0.6; 1.33)  | 5.7E-01 |
| cg08575843 | FBXO38   | chr5  | ExonBnd | 0.89 | (0.6; 1.33)  | 5.7E-01 |
| cg04391547 | UNC80    | chr2  | Body    | 0.92 | (0.67; 1.24) | 5.7E-01 |
| cg02244269 | ATP6V0C  | chr16 | 1stExon | 0.91 | (0.67; 1.25) | 5.7E-01 |



|                |           |       |         |      |              |         |
|----------------|-----------|-------|---------|------|--------------|---------|
| cg02244269     | ATP6V0C   | chr16 | 5'UTR   | 0.91 | (0.67; 1.25) | 5.7E-01 |
| cg07105285     | MTNR1B    | chr11 | TSS200  | 1.13 | (0.74; 1.74) | 5.7E-01 |
| cg03100853     | TNFRSF19  | chr13 | TSS1500 | 0.88 | (0.57; 1.36) | 5.7E-01 |
| cg20296624     | WVOX      | chr16 | Body    | 1.1  | (0.8; 1.5)   | 5.7E-01 |
| cg03216739     | WVOX      | chr16 | Body    | 0.9  | (0.63; 1.28) | 5.7E-01 |
| cg19410816     | PTPRN2    | chr7  | Body    | 0.88 | (0.58; 1.36) | 5.7E-01 |
| cg21533743     | FBXO31    | chr16 | Body    | 0.92 | (0.68; 1.24) | 5.7E-01 |
| cg21533743     | FBXO31    | chr16 | 5'UTR   | 0.92 | (0.68; 1.24) | 5.7E-01 |
| cg22715764     | PEX14     | chr1  | Body    | 1.12 | (0.76; 1.63) | 5.7E-01 |
| cg15557906     | AKAP13    | chr15 | Body    | 1.1  | (0.79; 1.52) | 5.7E-01 |
| cg00160464     | TENM2     | chr5  | Body    | 1.1  | (0.78; 1.56) | 5.7E-01 |
| cg02958960     | TNRC6C    | chr17 | Body    | 0.9  | (0.62; 1.3)  | 5.7E-01 |
| cg19927214     | PTPRN2    | chr7  | Body    | 1.09 | (0.8; 1.48)  | 5.7E-01 |
| cg11950360     | BRUNOL4   | chr18 | Body    | 1.1  | (0.79; 1.55) | 5.7E-01 |
| cg00048983     | TNRC6B    | chr22 | 5'UTR   | 1.19 | (0.65; 2.16) | 5.7E-01 |
| cg26665209     | CHFR      | chr12 | Body    | 1.1  | (0.79; 1.54) | 5.7E-01 |
| cg07881041     | PTPRS     | chr19 | Body    | 0.91 | (0.65; 1.27) | 5.7E-01 |
| cg16437731     | ZFP91     | chr11 | Body    | 1.12 | (0.75; 1.69) | 5.7E-01 |
| cg14009561     | TNFRSF1A  | chr12 | Body    | 0.91 | (0.66; 1.26) | 5.7E-01 |
| cg25220645     | TNR       | chr1  | 5'UTR   | 1.11 | (0.78; 1.58) | 5.7E-01 |
| cg16938246     | CACNA1C   | chr12 | Body    | 0.91 | (0.67; 1.25) | 5.7E-01 |
| cg08578996     | RNU5E-1   | chr5  | Body    | 0.89 | (0.6; 1.32)  | 5.7E-01 |
| cg06857898     | CUX2      | chr12 | Body    | 1.13 | (0.73; 1.75) | 5.7E-01 |
| cg09325373     | PTPRU     | chr1  | Body    | 1.13 | (0.74; 1.73) | 5.7E-01 |
| cg03692305     | ZBTB20    | chr3  | 5'UTR   | 0.92 | (0.67; 1.25) | 5.7E-01 |
| cg05291207     | NOL4      | chr18 | Body    | 0.89 | (0.6; 1.33)  | 5.7E-01 |
| cg20574732     | PTPRN2    | chr7  | Body    | 0.91 | (0.65; 1.27) | 5.7E-01 |
| cg02098482     | GNA12     | chr7  | Body    | 1.1  | (0.79; 1.54) | 5.7E-01 |
| cg04036430     | CDH11     | chr16 | Body    | 0.91 | (0.65; 1.27) | 5.7E-01 |
| cg16711733     | PTPRN2    | chr7  | Body    | 0.91 | (0.67; 1.25) | 5.7E-01 |
| cg05901917     | PTPRN2    | chr7  | Body    | 1.09 | (0.8; 1.49)  | 5.7E-01 |
| cg24394344     | ORC4      | chr2  | Body    | 0.88 | (0.57; 1.37) | 5.8E-01 |
| cg00267416     | WVOX      | chr16 | Body    | 1.1  | (0.78; 1.56) | 5.8E-01 |
| cg02045011     | PTPRN2    | chr7  | Body    | 1.09 | (0.81; 1.46) | 5.8E-01 |
| cg07207484     | PTPRN2    | chr7  | Body    | 0.92 | (0.7; 1.22)  | 5.8E-01 |
| cg16431722     | SCAF8     | chr6  | Body    | 1.09 | (0.8; 1.5)   | 5.8E-01 |
| cg27019257     | CSMD2     | chr1  | TSS1500 | 1.1  | (0.79; 1.53) | 5.8E-01 |
| cg13058240     | NOL4L     | chr20 | Body    | 1.09 | (0.81; 1.45) | 5.8E-01 |
| cg02367767     | PTPRN2    | chr7  | Body    | 1.09 | (0.8; 1.48)  | 5.8E-01 |
| cg20764753     | PTPRN2    | chr7  | Body    | 1.11 | (0.78; 1.58) | 5.8E-01 |
| cg19693191     | ERI3      | chr1  | Body    | 0.74 | (0.26; 2.13) | 5.8E-01 |
| cg17172331     | TNRC6C    | chr17 | Body    | 1.12 | (0.75; 1.68) | 5.8E-01 |
| cg12438819     | PTPRN2    | chr7  | Body    | 0.91 | (0.67; 1.25) | 5.8E-01 |
| cg26487908     | PTPRU     | chr1  | Body    | 0.89 | (0.6; 1.32)  | 5.8E-01 |
| cg04857420     | TNFRSF11B | chr8  | TSS1500 | 1.11 | (0.77; 1.61) | 5.8E-01 |
| cg03227481     | SLC16A9   | chr10 | 3'UTR   | 0.9  | (0.62; 1.3)  | 5.8E-01 |
| cg11239633     | CTDSPL    | chr3  | 1stExon | 1.1  | (0.79; 1.54) | 5.8E-01 |
| cg11239633     | CTDSPL    | chr3  | 5'UTR   | 1.1  | (0.79; 1.54) | 5.8E-01 |
| cg10827472     | UBE2E2    | chr3  | TSS200  | 0.91 | (0.66; 1.26) | 5.8E-01 |
| cg05191397     | TNRC18    | chr7  | Body    | 0.92 | (0.69; 1.23) | 5.8E-01 |
| ch.7.141697R   | GNA12     | chr7  | Body    | 1.1  | (0.79; 1.54) | 5.8E-01 |
| cg15778454     | RECQL5    | chr17 | TSS1500 | 1.1  | (0.78; 1.55) | 5.8E-01 |
| cg00930246     | DCUN1D4   | chr4  | 3'UTR   | 1.09 | (0.81; 1.45) | 5.8E-01 |
| cg19053250     | UNC80     | chr2  | Body    | 0.9  | (0.61; 1.31) | 5.8E-01 |
| ch.11.1112034R | ZFP91     | chr11 | 3'UTR   | 1.1  | (0.79; 1.52) | 5.8E-01 |
| cg11970327     | SUGCT     | chr7  | Body    | 0.89 | (0.58; 1.36) | 5.8E-01 |
| cg02109003     | CDH13     | chr16 | Body    | 0.92 | (0.67; 1.25) | 5.8E-01 |
| cg12986271     | TSHZ3     | chr19 | TSS1500 | 0.9  | (0.61; 1.31) | 5.8E-01 |
| cg21233506     | ACVR2A    | chr2  | Body    | 0.9  | (0.62; 1.31) | 5.8E-01 |
| cg14358376     | ZNF704    | chr8  | 5'UTR   | 1.09 | (0.8; 1.49)  | 5.8E-01 |
| cg14358376     | ZNF704    | chr8  | 1stExon | 1.09 | (0.8; 1.49)  | 5.8E-01 |



|            |              |       |         |      |              |         |
|------------|--------------|-------|---------|------|--------------|---------|
| cg19137098 | CHFR         | chr12 | 5'UTR   | 1.1  | (0.79; 1.53) | 5.8E-01 |
| cg08678311 | PHACTR1      | chr6  | Body    | 0.86 | (0.52; 1.44) | 5.8E-01 |
| cg27565880 | RTN4RL1      | chr17 | 1stExon | 0.87 | (0.54; 1.41) | 5.8E-01 |
| cg27565880 | RTN4RL1      | chr17 | 5'UTR   | 0.87 | (0.54; 1.41) | 5.8E-01 |
| cg19416470 | MEIS2        | chr15 | 5'UTR   | 1.1  | (0.79; 1.53) | 5.8E-01 |
| cg19416470 | MEIS2        | chr15 | TSS1500 | 1.1  | (0.79; 1.53) | 5.8E-01 |
| cg18379332 | WWOX         | chr16 | Body    | 0.92 | (0.68; 1.24) | 5.8E-01 |
| cg03417903 | LOC101929698 | chr20 | Body    | 1.11 | (0.77; 1.58) | 5.8E-01 |
| cg03417903 | NOL4L        | chr20 | Body    | 1.11 | (0.77; 1.58) | 5.8E-01 |
| cg07931460 | TAOK3        | chr12 | TSS200  | 1.1  | (0.78; 1.55) | 5.8E-01 |
| cg01019770 | RTN4RL1      | chr17 | TSS1500 | 1.21 | (0.62; 2.35) | 5.8E-01 |
| cg04910677 | BARX2        | chr11 | TSS200  | 1.1  | (0.79; 1.53) | 5.8E-01 |
| cg05785919 | ZBTB20       | chr3  | Body    | 0.88 | (0.55; 1.4)  | 5.8E-01 |
| cg05785919 | ZBTB20       | chr3  | 5'UTR   | 0.88 | (0.55; 1.4)  | 5.8E-01 |
| cg26385612 | CACNA1C      | chr12 | Body    | 1.12 | (0.76; 1.64) | 5.8E-01 |
| cg06094325 | PTPRN2       | chr7  | Body    | 0.92 | (0.68; 1.24) | 5.8E-01 |
| cg23459010 | FBXO38       | chr5  | TSS1500 | 0.91 | (0.65; 1.27) | 5.8E-01 |
| cg07609862 | MTNR1B       | chr11 | 1stExon | 1.13 | (0.74; 1.72) | 5.8E-01 |
| cg01973499 | NRXN1        | chr2  | Body    | 1.09 | (0.79; 1.51) | 5.8E-01 |
| cg16872357 | PTPRN2       | chr7  | Body    | 1.1  | (0.78; 1.54) | 5.8E-01 |
| cg19528789 | TNFRSF1B     | chr1  | Body    | 1.19 | (0.64; 2.21) | 5.8E-01 |
| cg11856093 | ARID1A       | chr1  | 1stExon | 1.09 | (0.8; 1.49)  | 5.8E-01 |
| cg18695665 | ATP8A1       | chr4  | Body    | 0.9  | (0.63; 1.29) | 5.8E-01 |
| cg00217442 | TNFRSF10D    | chr8  | TSS1500 | 0.91 | (0.65; 1.27) | 5.8E-01 |
| cg19401538 | CACNA1C      | chr12 | Body    | 0.86 | (0.5; 1.47)  | 5.8E-01 |
| cg22736379 | EIF2S1       | chr14 | Body    | 0.92 | (0.69; 1.23) | 5.8E-01 |
| cg22736379 | EIF2S1       | chr14 | ExonBnd | 0.92 | (0.69; 1.23) | 5.8E-01 |
| cg16888818 | RECQL5       | chr17 | Body    | 1.17 | (0.67; 2.04) | 5.8E-01 |
| cg21174746 | CTNND2       | chr5  | Body    | 0.89 | (0.6; 1.34)  | 5.8E-01 |
| cg04910041 | TNFRSF10B    | chr8  | Body    | 0.86 | (0.5; 1.48)  | 5.8E-01 |
| cg04910041 | TNFRSF10B    | chr8  | 3'UTR   | 0.86 | (0.5; 1.48)  | 5.8E-01 |
| cg27084026 | CHFR         | chr12 | TSS1500 | 1.09 | (0.8; 1.5)   | 5.8E-01 |
| cg22324022 | NRXN1        | chr2  | TSS200  | 1.11 | (0.76; 1.64) | 5.8E-01 |
| cg23223071 | PHACTR1      | chr6  | Body    | 0.86 | (0.5; 1.47)  | 5.8E-01 |
| cg17978472 | ZBTB20       | chr3  | Body    | 0.89 | (0.6; 1.34)  | 5.8E-01 |
| cg17978472 | ZBTB20       | chr3  | 5'UTR   | 0.89 | (0.6; 1.34)  | 5.8E-01 |
| cg04008445 | ZBTB20       | chr3  | 5'UTR   | 1.09 | (0.8; 1.49)  | 5.8E-01 |
| cg18446336 | GNA12        | chr7  | Body    | 0.9  | (0.62; 1.3)  | 5.8E-01 |
| cg22042546 | ARID1A       | chr1  | Body    | 0.89 | (0.57; 1.37) | 5.8E-01 |
| cg12877169 | MEIS2        | chr15 | 3'UTR   | 0.88 | (0.57; 1.37) | 5.8E-01 |
| cg09365094 | PTPRN2       | chr7  | Body    | 0.89 | (0.6; 1.34)  | 5.8E-01 |
| cg22208022 | ATF7IP       | chr12 | 5'UTR   | 1.19 | (0.63; 2.25) | 5.8E-01 |
| cg03892569 | PHACTR1      | chr6  | Body    | 1.11 | (0.77; 1.61) | 5.8E-01 |
| cg14152468 | CACNA1C      | chr12 | Body    | 0.91 | (0.64; 1.29) | 5.8E-01 |
| cg19492446 | BRUNOL4      | chr18 | 1stExon | 0.88 | (0.55; 1.41) | 5.8E-01 |
| cg19492446 | BRUNOL4      | chr18 | 5'UTR   | 0.88 | (0.55; 1.41) | 5.8E-01 |
| cg13102244 | PTPRN2       | chr7  | Body    | 1.11 | (0.76; 1.62) | 5.8E-01 |
| cg04787317 | CTDSPL       | chr3  | Body    | 0.92 | (0.67; 1.26) | 5.8E-01 |
| cg12850049 | CHCHD6       | chr3  | Body    | 0.9  | (0.61; 1.32) | 5.9E-01 |
| cg25513668 | WWOX         | chr16 | TSS1500 | 1.09 | (0.79; 1.51) | 5.9E-01 |
| cg11183535 | PTPRN2       | chr7  | Body    | 1.09 | (0.8; 1.49)  | 5.9E-01 |
| cg12652374 | PTPRS        | chr19 | Body    | 1.15 | (0.7; 1.88)  | 5.9E-01 |
| cg26771582 | FBXO31       | chr16 | Body    | 1.11 | (0.76; 1.62) | 5.9E-01 |
| cg24506197 | PTPRN2       | chr7  | Body    | 0.91 | (0.66; 1.27) | 5.9E-01 |
| cg09686185 | TNFRSF11B    | chr8  | TSS200  | 1.16 | (0.68; 2)    | 5.9E-01 |
| cg15767067 | TENM2        | chr5  | Body    | 1.13 | (0.73; 1.74) | 5.9E-01 |
| cg12268285 | SUGCT        | chr7  | Body    | 0.91 | (0.65; 1.28) | 5.9E-01 |
| cg17493489 | CNTNAP2      | chr7  | Body    | 1.14 | (0.72; 1.8)  | 5.9E-01 |
| cg02720761 | PTPRN2       | chr7  | Body    | 1.09 | (0.8; 1.5)   | 5.9E-01 |
| cg25001924 | PTPRN2       | chr7  | Body    | 0.91 | (0.66; 1.26) | 5.9E-01 |
| cg14668632 | GNA12        | chr7  | Body    | 0.92 | (0.67; 1.25) | 5.9E-01 |



|               |                  |       |         |      |              |         |
|---------------|------------------|-------|---------|------|--------------|---------|
| cg06337557    | <i>MTNR1B</i>    | chr11 | TSS1500 | 0.92 | (0.68; 1.24) | 5.9E-01 |
| cg18476176    | <i>CNTF</i>      | chr11 | 3'UTR   | 0.92 | (0.68; 1.24) | 5.9E-01 |
| cg00528572    | <i>MTNR1B</i>    | chr11 | Body    | 1.1  | (0.78; 1.56) | 5.9E-01 |
| cg19239937    | <i>NOL4L</i>     | chr20 | Body    | 1.21 | (0.61; 2.37) | 5.9E-01 |
| cg05115844    | <i>CDH13</i>     | chr16 | 5'UTR   | 0.89 | (0.58; 1.37) | 5.9E-01 |
| cg05115844    | <i>CDH13</i>     | chr16 | Body    | 0.89 | (0.58; 1.37) | 5.9E-01 |
| cg06376522    | <i>ZFP91</i>     | chr11 | 1stExon | 0.92 | (0.68; 1.24) | 5.9E-01 |
| cg18833720    | <i>TNFRSF1B</i>  | chr1  | TSS200  | 1.09 | (0.8; 1.49)  | 5.9E-01 |
| cg13283862    | <i>PTPRN2</i>    | chr7  | Body    | 0.92 | (0.69; 1.23) | 5.9E-01 |
| ch.7.1973356R | <i>COL1A2</i>    | chr7  | Body    | 1.09 | (0.81; 1.46) | 5.9E-01 |
| cg21830914    | <i>AKAP13</i>    | chr15 | 5'UTR   | 1.12 | (0.74; 1.71) | 5.9E-01 |
| cg18694815    | <i>RTN4</i>      | chr2  | TSS1500 | 0.84 | (0.45; 1.57) | 5.9E-01 |
| cg22941315    | <i>TNR</i>       | chr1  | 5'UTR   | 0.9  | (0.6; 1.34)  | 5.9E-01 |
| cg05211947    | <i>ATP8A1</i>    | chr4  | Body    | 1.1  | (0.78; 1.55) | 5.9E-01 |
| cg17500918    | <i>PTPRN2</i>    | chr7  | Body    | 1.09 | (0.81; 1.46) | 5.9E-01 |
| cg08770761    | <i>ATP6V0C</i>   | chr16 | TSS1500 | 0.9  | (0.62; 1.31) | 5.9E-01 |
| cg20191365    | <i>NOL4</i>      | chr18 | 5'UTR   | 1.08 | (0.82; 1.42) | 5.9E-01 |
| cg20191365    | <i>NOL4</i>      | chr18 | Body    | 1.08 | (0.82; 1.42) | 5.9E-01 |
| cg17850518    | <i>MEIS2</i>     | chr15 | 5'UTR   | 0.9  | (0.62; 1.31) | 5.9E-01 |
| cg17850518    | <i>MEIS2</i>     | chr15 | 1stExon | 0.9  | (0.62; 1.31) | 5.9E-01 |
| cg17850518    | <i>MEIS2</i>     | chr15 | TSS1500 | 0.9  | (0.62; 1.31) | 5.9E-01 |
| cg15440763    | <i>PTPRN2</i>    | chr7  | Body    | 0.92 | (0.68; 1.25) | 5.9E-01 |
| cg09027472    | <i>PTPRN2</i>    | chr7  | Body    | 1.1  | (0.79; 1.53) | 5.9E-01 |
| cg13937162    | <i>PTPRN2</i>    | chr7  | Body    | 1.09 | (0.8; 1.48)  | 5.9E-01 |
| cg20193173    | <i>SLC16A9</i>   | chr10 | TSS200  | 1.09 | (0.79; 1.51) | 5.9E-01 |
| cg08198677    | <i>CTDSPL</i>    | chr3  | Body    | 0.91 | (0.66; 1.26) | 5.9E-01 |
| cg15699231    | <i>AKAP13</i>    | chr15 | 5'UTR   | 1.09 | (0.81; 1.46) | 5.9E-01 |
| cg02582608    | <i>ALCAM</i>     | chr3  | 5'UTR   | 1.09 | (0.8; 1.47)  | 5.9E-01 |
| cg02582608    | <i>ALCAM</i>     | chr3  | 1stExon | 1.09 | (0.8; 1.47)  | 5.9E-01 |
| cg23841288    | <i>PTPRN2</i>    | chr7  | Body    | 1.08 | (0.81; 1.45) | 5.9E-01 |
| cg09874333    | <i>PTPRN2</i>    | chr7  | Body    | 1.09 | (0.8; 1.49)  | 5.9E-01 |
| cg01765461    | <i>TNFRSF11A</i> | chr18 | Body    | 0.9  | (0.62; 1.31) | 5.9E-01 |
| cg15337334    | <i>CSMD2</i>     | chr1  | Body    | 0.91 | (0.65; 1.27) | 5.9E-01 |
| cg10714075    | <i>CACNA1C</i>   | chr12 | Body    | 0.91 | (0.63; 1.3)  | 5.9E-01 |
| cg24652817    | <i>PTPRN2</i>    | chr7  | Body    | 1.09 | (0.79; 1.51) | 5.9E-01 |
| cg12297625    | <i>PTPRN2</i>    | chr7  | Body    | 0.92 | (0.67; 1.25) | 5.9E-01 |
| cg20416574    | <i>FBXO11</i>    | chr2  | 5'UTR   | 1.12 | (0.75; 1.67) | 5.9E-01 |
| cg00157932    | <i>PTPRN2</i>    | chr7  | Body    | 0.91 | (0.65; 1.27) | 5.9E-01 |
| cg19969113    | <i>TAOK3</i>     | chr12 | 5'UTR   | 0.88 | (0.55; 1.4)  | 5.9E-01 |
| cg03760856    | <i>TNRC6C</i>    | chr17 | 5'UTR   | 1.09 | (0.79; 1.52) | 5.9E-01 |
| cg16293347    | <i>TAOK3</i>     | chr12 | 5'UTR   | 1.13 | (0.73; 1.74) | 5.9E-01 |
| cg10021276    | <i>PTPRN2</i>    | chr7  | Body    | 1.08 | (0.81; 1.45) | 5.9E-01 |
| cg05406774    | <i>FBXO31</i>    | chr16 | Body    | 1.1  | (0.78; 1.54) | 5.9E-01 |
| cg24248713    | <i>NOL4</i>      | chr18 | TSS200  | 0.9  | (0.6; 1.34)  | 5.9E-01 |
| cg26610739    | <i>CDH13</i>     | chr16 | Body    | 0.92 | (0.69; 1.24) | 5.9E-01 |
| cg17150496    | <i>CHCHD6</i>    | chr3  | Body    | 0.89 | (0.58; 1.36) | 5.9E-01 |
| cg23117592    | <i>UNC80</i>     | chr2  | Body    | 1.1  | (0.77; 1.58) | 5.9E-01 |
| cg19434087    | <i>PTPRN2</i>    | chr7  | Body    | 0.92 | (0.67; 1.25) | 5.9E-01 |
| cg02921852    | <i>PEX14</i>     | chr1  | Body    | 1.09 | (0.8; 1.48)  | 5.9E-01 |
| cg05315106    | <i>PTPRN2</i>    | chr7  | Body    | 0.92 | (0.66; 1.26) | 5.9E-01 |
| cg15042868    | <i>ATP6V0C</i>   | chr16 | Body    | 1.1  | (0.77; 1.58) | 5.9E-01 |
| cg15243366    | <i>PTPRN2</i>    | chr7  | Body    | 1.09 | (0.79; 1.5)  | 5.9E-01 |
| cg02268137    | <i>ATP6V0C</i>   | chr16 | TSS1500 | 0.89 | (0.58; 1.36) | 5.9E-01 |
| cg11966450    | <i>TNFRSF11A</i> | chr18 | TSS1500 | 0.9  | (0.61; 1.33) | 5.9E-01 |
| cg19319735    | <i>TNRC18</i>    | chr7  | TSS200  | 0.91 | (0.66; 1.27) | 5.9E-01 |
| cg08128228    | <i>POU2F1</i>    | chr1  | 5'UTR   | 1.1  | (0.78; 1.55) | 5.9E-01 |
| cg24902435    | <i>CACNA1C</i>   | chr12 | Body    | 0.9  | (0.61; 1.33) | 5.9E-01 |
| cg04002822    | <i>CACNA1C</i>   | chr12 | Body    | 0.91 | (0.66; 1.27) | 5.9E-01 |
| cg26889948    | <i>TNFRSF11B</i> | chr8  | Body    | 1.1  | (0.78; 1.56) | 5.9E-01 |
| cg07397572    | <i>WWOX</i>      | chr16 | Body    | 1.13 | (0.72; 1.79) | 5.9E-01 |
| cg05642515    | <i>GNA12</i>     | chr7  | Body    | 1.1  | (0.77; 1.57) | 5.9E-01 |



|            |                |       |         |      |              |         |
|------------|----------------|-------|---------|------|--------------|---------|
| cg01460435 | <i>PTPRN2</i>  | chr7  | Body    | 0.92 | (0.66; 1.26) | 5.9E-01 |
| cg06518844 | <i>NOL4L</i>   | chr20 | Body    | 1.1  | (0.78; 1.54) | 5.9E-01 |
| cg10712687 | <i>MTNR1B</i>  | chr11 | Body    | 1.09 | (0.8; 1.48)  | 5.9E-01 |
| cg20837354 | <i>CACNA1C</i> | chr12 | Body    | 1.09 | (0.79; 1.5)  | 5.9E-01 |
| cg26266431 | <i>PTPRN2</i>  | chr7  | Body    | 1.08 | (0.81; 1.46) | 5.9E-01 |
| cg14839830 | <i>FBXO38</i>  | chr5  | 5'UTR   | 1.09 | (0.79; 1.51) | 5.9E-01 |
| cg09367993 | <i>CHCHD6</i>  | chr3  | Body    | 1.1  | (0.77; 1.59) | 5.9E-01 |
| cg19072211 | <i>TNRC18</i>  | chr7  | Body    | 1.1  | (0.78; 1.55) | 5.9E-01 |
| cg18066197 | <i>CHFR</i>    | chr12 | 3'UTR   | 0.92 | (0.67; 1.26) | 5.9E-01 |
| cg13373757 | <i>CACNA1C</i> | chr12 | Body    | 1.12 | (0.74; 1.68) | 5.9E-01 |
| cg06654782 | <i>FBXO31</i>  | chr16 | Body    | 0.9  | (0.6; 1.34)  | 5.9E-01 |
| cg11510825 | <i>CDH11</i>   | chr16 | 5'UTR   | 0.9  | (0.62; 1.32) | 5.9E-01 |
| cg26075259 | <i>PTPRN2</i>  | chr7  | Body    | 1.09 | (0.8; 1.49)  | 5.9E-01 |
| cg01556227 | <i>TDRP</i>    | chr8  | TSS1500 | 1.09 | (0.79; 1.52) | 5.9E-01 |
| cg01556227 | <i>TDRP</i>    | chr8  | TSS200  | 1.09 | (0.79; 1.52) | 5.9E-01 |
| cg22795123 | <i>PTPRN2</i>  | chr7  | Body    | 1.08 | (0.81; 1.45) | 5.9E-01 |
| cg21149967 | <i>CTDSP2</i>  | chr12 | Body    | 1.1  | (0.78; 1.53) | 5.9E-01 |
| cg11797430 | <i>CACNA1C</i> | chr12 | Body    | 0.88 | (0.56; 1.39) | 5.9E-01 |
| cg12648261 | <i>CSMD2</i>   | chr1  | Body    | 0.92 | (0.69; 1.24) | 5.9E-01 |
| cg13280512 | <i>TNRC6C</i>  | chr17 | TSS200  | 0.89 | (0.59; 1.35) | 5.9E-01 |
| cg15152666 | <i>PDE8A</i>   | chr15 | TSS200  | 0.92 | (0.67; 1.26) | 5.9E-01 |
| cg01075996 | <i>SUGCT</i>   | chr7  | Body    | 1.12 | (0.73; 1.73) | 5.9E-01 |
| cg11171719 | <i>CTDSPL</i>  | chr3  | 1stExon | 1.1  | (0.78; 1.54) | 5.9E-01 |
| cg11171719 | <i>CTDSPL</i>  | chr3  | 5'UTR   | 1.1  | (0.78; 1.54) | 5.9E-01 |
| cg21697198 | <i>BARX2</i>   | chr11 | Body    | 0.9  | (0.6; 1.34)  | 5.9E-01 |
| cg24524099 | <i>PTPRN2</i>  | chr7  | Body    | 1.08 | (0.82; 1.41) | 5.9E-01 |
| cg00136902 | <i>TSHZ3</i>   | chr19 | Body    | 1.14 | (0.71; 1.82) | 5.9E-01 |
| cg26670992 | <i>ATP8A1</i>  | chr4  | ExonBnd | 0.89 | (0.58; 1.36) | 5.9E-01 |
| cg26670992 | <i>ATP8A1</i>  | chr4  | Body    | 0.89 | (0.58; 1.36) | 5.9E-01 |
| cg25399162 | <i>BRUNOL4</i> | chr18 | 3'UTR   | 1.1  | (0.77; 1.57) | 5.9E-01 |
| cg25242769 | <i>CSMD2</i>   | chr1  | Body    | 1.11 | (0.75; 1.64) | 6.0E-01 |
| cg14170597 | <i>PEX14</i>   | chr1  | Body    | 0.91 | (0.64; 1.29) | 6.0E-01 |
| cg26365813 | <i>RTN4RL1</i> | chr17 | Body    | 1.11 | (0.75; 1.65) | 6.0E-01 |
| cg19685156 | <i>CSMD2</i>   | chr1  | TSS1500 | 0.89 | (0.59; 1.35) | 6.0E-01 |
| cg19685156 | <i>CSMD2</i>   | chr1  | TSS200  | 0.89 | (0.59; 1.35) | 6.0E-01 |
| cg12896146 | <i>MTNR1A</i>  | chr4  | TSS1500 | 1.08 | (0.81; 1.45) | 6.0E-01 |
| cg26711073 | <i>CSMD2</i>   | chr1  | TSS1500 | 0.92 | (0.66; 1.27) | 6.0E-01 |
| cg26711073 | <i>CSMD2</i>   | chr1  | TSS200  | 0.92 | (0.66; 1.27) | 6.0E-01 |
| cg13333722 | <i>CTDSPL</i>  | chr3  | Body    | 0.92 | (0.67; 1.26) | 6.0E-01 |
| cg18816129 | <i>MEIS2</i>   | chr15 | Body    | 1.1  | (0.78; 1.54) | 6.0E-01 |
| cg14254396 | <i>PTPRS</i>   | chr19 | 5'UTR   | 0.91 | (0.63; 1.31) | 6.0E-01 |
| cg02157637 | <i>CDH11</i>   | chr16 | Body    | 1.08 | (0.81; 1.44) | 6.0E-01 |
| cg24006939 | <i>CDH13</i>   | chr16 | 5'UTR   | 0.92 | (0.68; 1.25) | 6.0E-01 |
| cg24006939 | <i>CDH13</i>   | chr16 | Body    | 0.92 | (0.68; 1.25) | 6.0E-01 |
| cg06690459 | <i>ZBTB20</i>  | chr3  | Body    | 1.09 | (0.78; 1.53) | 6.0E-01 |
| cg26200971 | <i>TNRC6C</i>  | chr17 | Body    | 1.09 | (0.8; 1.47)  | 6.0E-01 |
| cg15779785 | <i>CACNA1C</i> | chr12 | Body    | 0.92 | (0.66; 1.27) | 6.0E-01 |
| cg11435826 | <i>CACNA1C</i> | chr12 | Body    | 1.11 | (0.75; 1.66) | 6.0E-01 |
| cg05478790 | <i>TNRC6C</i>  | chr17 | 3'UTR   | 0.91 | (0.64; 1.3)  | 6.0E-01 |
| cg19010490 | <i>MEIS2</i>   | chr15 | Body    | 1.08 | (0.81; 1.45) | 6.0E-01 |
| cg03601549 | <i>WWOX</i>    | chr16 | Body    | 1.1  | (0.77; 1.56) | 6.0E-01 |
| cg17317475 | <i>EIF2S1</i>  | chr14 | 5'UTR   | 1.1  | (0.78; 1.55) | 6.0E-01 |
| cg09126043 | <i>CEP350</i>  | chr1  | TSS1500 | 0.91 | (0.65; 1.28) | 6.0E-01 |
| cg15932065 | <i>CNTNAP2</i> | chr7  | Body    | 0.91 | (0.64; 1.29) | 6.0E-01 |
| cg11461133 | <i>GNA12</i>   | chr7  | TSS200  | 1.09 | (0.78; 1.53) | 6.0E-01 |
| cg07279321 | <i>PHACTR1</i> | chr6  | TSS200  | 0.91 | (0.63; 1.31) | 6.0E-01 |
| cg14168080 | <i>PTPRN2</i>  | chr7  | Body    | 1.09 | (0.8; 1.47)  | 6.0E-01 |
| cg08116832 | <i>CDH13</i>   | chr16 | Body    | 1.11 | (0.74; 1.67) | 6.0E-01 |
| cg00305071 | <i>CSMD2</i>   | chr1  | Body    | 1.09 | (0.79; 1.5)  | 6.0E-01 |
| cg07979652 | <i>PTPRN2</i>  | chr7  | Body    | 1.1  | (0.77; 1.58) | 6.0E-01 |
| cg26743518 | <i>RNU5E-1</i> | chr5  | Body    | 1.1  | (0.77; 1.59) | 6.0E-01 |



|            |                |       |         |      |              |         |
|------------|----------------|-------|---------|------|--------------|---------|
| cg20391873 | <i>SRSF10</i>  | chr1  | Body    | 1.09 | (0.8; 1.48)  | 6.0E-01 |
| cg20391873 | <i>SRSF10</i>  | chr1  | 5'UTR   | 1.09 | (0.8; 1.48)  | 6.0E-01 |
| cg20391873 | <i>SRSF10</i>  | chr1  | 1stExon | 1.09 | (0.8; 1.48)  | 6.0E-01 |
| cg18533833 | <i>CHFR</i>    | chr12 | TSS1500 | 1.09 | (0.79; 1.49) | 6.0E-01 |
| cg03105520 | <i>ZBTB20</i>  | chr3  | Body    | 0.92 | (0.68; 1.26) | 6.0E-01 |
| cg13589913 | <i>FBXO31</i>  | chr16 | Body    | 0.93 | (0.69; 1.24) | 6.0E-01 |
| cg02086580 | <i>CHFR</i>    | chr12 | Body    | 1.09 | (0.78; 1.54) | 6.0E-01 |
| cg16936823 | <i>CDH13</i>   | chr16 | Body    | 1.1  | (0.78; 1.54) | 6.0E-01 |
| cg13401235 | <i>PHACTR1</i> | chr6  | Body    | 0.9  | (0.6; 1.34)  | 6.0E-01 |
| cg12967902 | <i>PTPRN2</i>  | chr7  | Body    | 0.9  | (0.61; 1.33) | 6.0E-01 |
| cg07666246 | <i>PTPRN2</i>  | chr7  | Body    | 0.91 | (0.65; 1.28) | 6.0E-01 |
| cg03892601 | <i>CNTNAP2</i> | chr7  | Body    | 1.08 | (0.8; 1.45)  | 6.0E-01 |
| cg20025824 | <i>TNRC18</i>  | chr7  | Body    | 1.08 | (0.8; 1.46)  | 6.0E-01 |
| cg00906838 | <i>CSMD2</i>   | chr1  | Body    | 1.11 | (0.74; 1.68) | 6.0E-01 |
| cg19954255 | <i>CSMD2</i>   | chr1  | Body    | 1.11 | (0.75; 1.66) | 6.0E-01 |
| cg03444934 | <i>CDH13</i>   | chr16 | Body    | 1.08 | (0.81; 1.45) | 6.0E-01 |
| cg14931071 | <i>PHACTR1</i> | chr6  | TSS200  | 1.08 | (0.8; 1.47)  | 6.0E-01 |
| cg23868899 | <i>FBXO32</i>  | chr8  | TSS200  | 1.08 | (0.81; 1.45) | 6.0E-01 |
| cg10982824 | <i>RTN4RL1</i> | chr17 | Body    | 0.91 | (0.64; 1.29) | 6.0E-01 |
| cg03103322 | <i>AKAP13</i>  | chr15 | 5'UTR   | 1.09 | (0.78; 1.52) | 6.0E-01 |
| cg00887547 | <i>TAOK3</i>   | chr12 | TSS1500 | 0.93 | (0.69; 1.24) | 6.0E-01 |
| cg25535592 | <i>AKAP13</i>  | chr15 | Body    | 0.92 | (0.69; 1.24) | 6.0E-01 |
| cg22557207 | <i>ALCAM</i>   | chr3  | Body    | 1.11 | (0.76; 1.61) | 6.0E-01 |
| cg11025065 | <i>TNRC6B</i>  | chr22 | Body    | 0.91 | (0.63; 1.31) | 6.0E-01 |
| cg23273041 | <i>NRXN1</i>   | chr2  | TSS1500 | 0.91 | (0.65; 1.29) | 6.0E-01 |
| cg11682700 | <i>ZBTB20</i>  | chr3  | Body    | 0.92 | (0.68; 1.25) | 6.0E-01 |
| cg11682700 | <i>ZBTB20</i>  | chr3  | 1stExon | 0.92 | (0.68; 1.25) | 6.0E-01 |
| cg11682700 | <i>ZBTB20</i>  | chr3  | 5'UTR   | 0.92 | (0.68; 1.25) | 6.0E-01 |
| cg11186233 | <i>AKAP13</i>  | chr15 | 5'UTR   | 1.1  | (0.77; 1.58) | 6.1E-01 |
| cg04983128 | <i>PEX14</i>   | chr1  | Body    | 1.09 | (0.79; 1.49) | 6.1E-01 |
| cg04487038 | <i>WWOX</i>    | chr16 | Body    | 1.09 | (0.79; 1.5)  | 6.1E-01 |
| cg11227520 | <i>PTPRN2</i>  | chr7  | 3'UTR   | 0.92 | (0.67; 1.26) | 6.1E-01 |
| cg02957771 | <i>FBXO31</i>  | chr16 | Body    | 0.91 | (0.64; 1.29) | 6.1E-01 |
| cg02264057 | <i>SUGCT</i>   | chr7  | Body    | 1.11 | (0.75; 1.64) | 6.1E-01 |
| cg26609691 | <i>CHFR</i>    | chr12 | Body    | 0.92 | (0.67; 1.26) | 6.1E-01 |
| cg15129971 | <i>CTNND2</i>  | chr5  | Body    | 0.9  | (0.6; 1.34)  | 6.1E-01 |
| cg00751730 | <i>PTPRN2</i>  | chr7  | Body    | 1.09 | (0.79; 1.51) | 6.1E-01 |
| cg15022739 | <i>BRUNOL4</i> | chr18 | 3'UTR   | 0.9  | (0.6; 1.34)  | 6.1E-01 |
| cg02482968 | <i>AKAP13</i>  | chr15 | 5'UTR   | 1.09 | (0.78; 1.55) | 6.1E-01 |
| cg02674114 | <i>ERI3</i>    | chr1  | TSS1500 | 0.93 | (0.7; 1.23)  | 6.1E-01 |
| cg04662039 | <i>PTPRN2</i>  | chr7  | Body    | 0.92 | (0.65; 1.28) | 6.1E-01 |
| cg10954931 | <i>WAC</i>     | chr10 | Body    | 1.11 | (0.74; 1.66) | 6.1E-01 |
| cg21706794 | <i>AKAP13</i>  | chr15 | Body    | 1.18 | (0.63; 2.23) | 6.1E-01 |
| cg00013809 | <i>PTPRN2</i>  | chr7  | Body    | 0.92 | (0.68; 1.25) | 6.1E-01 |
| cg03480435 | <i>CSMD2</i>   | chr1  | Body    | 0.92 | (0.67; 1.26) | 6.1E-01 |
| cg13525062 | <i>PTPRN2</i>  | chr7  | Body    | 1.1  | (0.77; 1.55) | 6.1E-01 |
| cg04917686 | <i>ZBTB20</i>  | chr3  | TSS1500 | 1.08 | (0.8; 1.46)  | 6.1E-01 |
| cg11331344 | <i>RECQL5</i>  | chr17 | Body    | 0.89 | (0.58; 1.38) | 6.1E-01 |
| cg24000316 | <i>CHFR</i>    | chr12 | Body    | 1.09 | (0.79; 1.51) | 6.1E-01 |
| cg00463844 | <i>PDE8A</i>   | chr15 | 5'UTR   | 1.31 | (0.47; 3.65) | 6.1E-01 |
| cg00463844 | <i>PDE8A</i>   | chr15 | Body    | 1.31 | (0.47; 3.65) | 6.1E-01 |
| cg19550490 | <i>PTPRN2</i>  | chr7  | Body    | 0.9  | (0.61; 1.33) | 6.1E-01 |
| cg19807706 | <i>CSMD2</i>   | chr1  | Body    | 1.08 | (0.79; 1.48) | 6.1E-01 |
| cg12822074 | <i>RTN4RL2</i> | chr11 | Body    | 0.92 | (0.68; 1.26) | 6.1E-01 |
| cg09222287 | <i>ALCAM</i>   | chr3  | TSS1500 | 0.93 | (0.7; 1.24)  | 6.1E-01 |
| cg09827826 | <i>PTPRN2</i>  | chr7  | Body    | 1.08 | (0.81; 1.45) | 6.1E-01 |
| cg03186058 | <i>ERI3</i>    | chr1  | Body    | 1.09 | (0.79; 1.51) | 6.1E-01 |
| cg03186058 | <i>ERI3</i>    | chr1  | 5'UTR   | 1.09 | (0.79; 1.51) | 6.1E-01 |
| cg22019065 | <i>UNC80</i>   | chr2  | Body    | 0.91 | (0.65; 1.29) | 6.1E-01 |
| cg18764007 | <i>ZFP91</i>   | chr11 | Body    | 0.91 | (0.63; 1.31) | 6.1E-01 |
| cg22395765 | <i>PTPRN2</i>  | chr7  | Body    | 1.15 | (0.68; 1.93) | 6.1E-01 |



|            |                     |       |         |      |              |         |
|------------|---------------------|-------|---------|------|--------------|---------|
| cg19616316 | <i>CTNND2</i>       | chr5  | Body    | 1.09 | (0.79; 1.51) | 6.1E-01 |
| cg04883944 | <i>AKAP13</i>       | chr15 | Body    | 0.91 | (0.64; 1.29) | 6.1E-01 |
| cg02973961 | <i>CDH11</i>        | chr16 | 5'UTR   | 1.09 | (0.78; 1.52) | 6.1E-01 |
| cg23268879 | <i>TNRC18</i>       | chr7  | Body    | 1.09 | (0.79; 1.49) | 6.1E-01 |
| cg16646459 | <i>CUX2</i>         | chr12 | Body    | 1.12 | (0.73; 1.72) | 6.1E-01 |
| cg08788291 | <i>RECQL5</i>       | chr17 | Body    | 0.91 | (0.62; 1.33) | 6.1E-01 |
| cg16038616 | <i>WWOX</i>         | chr16 | Body    | 1.1  | (0.75; 1.62) | 6.1E-01 |
| cg05649108 | <i>BRUNOL4</i>      | chr18 | Body    | 0.92 | (0.65; 1.28) | 6.1E-01 |
| cg09740815 | <i>CREBBP</i>       | chr16 | Body    | 1.09 | (0.79; 1.49) | 6.1E-01 |
| cg09171093 | <i>SGIP1</i>        | chr1  | Body    | 1.09 | (0.78; 1.54) | 6.1E-01 |
| cg07833128 | <i>TSHZ3</i>        | chr19 | Body    | 1.13 | (0.7; 1.84)  | 6.1E-01 |
| cg16705205 | <i>BRUNOL4</i>      | chr18 | Body    | 0.91 | (0.63; 1.31) | 6.1E-01 |
| cg13263093 | <i>PHACTR1</i>      | chr6  | Body    | 1.08 | (0.81; 1.43) | 6.1E-01 |
| cg14412317 | <i>PTPRN2</i>       | chr7  | TSS200  | 0.92 | (0.67; 1.27) | 6.1E-01 |
| cg20705566 | <i>DCUN1D4</i>      | chr4  | 1stExon | 1.1  | (0.77; 1.58) | 6.1E-01 |
| cg20705566 | <i>DCUN1D4</i>      | chr4  | 5'UTR   | 1.1  | (0.77; 1.58) | 6.1E-01 |
| cg08466256 | <i>COL5A2</i>       | chr2  | Body    | 1.13 | (0.71; 1.81) | 6.1E-01 |
| cg01077450 | <i>CTNND2</i>       | chr5  | Body    | 1.13 | (0.7; 1.84)  | 6.1E-01 |
| cg14779017 | <i>ZNF704</i>       | chr8  | Body    | 0.9  | (0.61; 1.33) | 6.1E-01 |
| cg15356885 | <i>TXNDC9</i>       | chr2  | TSS1500 | 0.92 | (0.68; 1.25) | 6.1E-01 |
| cg03048087 | <i>LOC101928417</i> | chr16 | Body    | 0.92 | (0.67; 1.27) | 6.1E-01 |
| cg03048087 | <i>CDH13</i>        | chr16 | 5'UTR   | 0.92 | (0.67; 1.27) | 6.1E-01 |
| cg03048087 | <i>CDH13</i>        | chr16 | Body    | 0.92 | (0.67; 1.27) | 6.1E-01 |
| cg23381598 | <i>RTN4R</i>        | chr22 | TSS1500 | 1.11 | (0.74; 1.66) | 6.1E-01 |
| cg05034068 | <i>RNU5E-1</i>      | chr5  | Body    | 1.14 | (0.69; 1.89) | 6.1E-01 |
| cg15729307 | <i>BRUNOL4</i>      | chr18 | Body    | 1.13 | (0.7; 1.81)  | 6.1E-01 |
| cg22783363 | <i>TNFRSF10D</i>    | chr8  | TSS200  | 1.09 | (0.78; 1.52) | 6.1E-01 |
| cg06593940 | <i>PTPRN2</i>       | chr7  | Body    | 0.93 | (0.7; 1.24)  | 6.1E-01 |
| cg06621425 | <i>PTPRN2</i>       | chr7  | Body    | 0.92 | (0.68; 1.25) | 6.1E-01 |
| cg10784597 | <i>NOL4</i>         | chr18 | Body    | 1.08 | (0.8; 1.47)  | 6.1E-01 |
| cg17692242 | <i>SGIP1</i>        | chr1  | TSS1500 | 1.08 | (0.8; 1.47)  | 6.1E-01 |
| cg12566378 | <i>NRXN1</i>        | chr2  | Body    | 1.09 | (0.78; 1.52) | 6.1E-01 |
| cg13334304 | <i>UBE2E2</i>       | chr3  | 3'UTR   | 1.09 | (0.78; 1.52) | 6.1E-01 |
| cg07259683 | <i>MEIS2</i>        | chr15 | Body    | 0.91 | (0.63; 1.32) | 6.1E-01 |
| cg25663171 | <i>TENM2</i>        | chr5  | Body    | 1.11 | (0.74; 1.65) | 6.1E-01 |
| cg11082691 | <i>TNFRSF19</i>     | chr13 | Body    | 0.92 | (0.65; 1.29) | 6.1E-01 |
| cg03396323 | <i>ATP8A1</i>       | chr4  | Body    | 1.12 | (0.73; 1.72) | 6.1E-01 |
| cg00996959 | <i>CNTNAP2</i>      | chr7  | Body    | 1.09 | (0.78; 1.52) | 6.1E-01 |
| cg16405211 | <i>CNTNAP2</i>      | chr7  | Body    | 0.92 | (0.66; 1.28) | 6.1E-01 |
| cg14974397 | <i>ACVR2A</i>       | chr2  | 5'UTR   | 1.15 | (0.68; 1.94) | 6.1E-01 |
| cg14974397 | <i>ACVR2A</i>       | chr2  | TSS1500 | 1.15 | (0.68; 1.94) | 6.1E-01 |
| cg14974397 | <i>ACVR2A</i>       | chr2  | 1stExon | 1.15 | (0.68; 1.94) | 6.1E-01 |
| cg00545573 | <i>TAOK3</i>        | chr12 | 5'UTR   | 1.08 | (0.8; 1.47)  | 6.1E-01 |
| cg02578058 | <i>UNC80</i>        | chr2  | Body    | 0.91 | (0.65; 1.3)  | 6.1E-01 |
| cg07433663 | <i>MEIS2</i>        | chr15 | 5'UTR   | 0.89 | (0.55; 1.42) | 6.1E-01 |
| cg07433663 | <i>MEIS2</i>        | chr15 | 1stExon | 0.89 | (0.55; 1.42) | 6.1E-01 |
| cg07433663 | <i>MEIS2</i>        | chr15 | Body    | 0.89 | (0.55; 1.42) | 6.1E-01 |
| cg02393980 | <i>TNRC6A</i>       | chr16 | Body    | 0.91 | (0.62; 1.33) | 6.1E-01 |
| cg03572284 | <i>ZBTB20</i>       | chr3  | 5'UTR   | 1.19 | (0.6; 2.35)  | 6.1E-01 |
| cg03487305 | <i>FBXO34</i>       | chr14 | 5'UTR   | 1.09 | (0.78; 1.52) | 6.1E-01 |
| cg23159970 | <i>CACNA1C</i>      | chr12 | Body    | 0.93 | (0.69; 1.25) | 6.1E-01 |
| cg15092213 | <i>GNA12</i>        | chr7  | Body    | 0.92 | (0.68; 1.26) | 6.1E-01 |
| cg14656131 | <i>UNC80</i>        | chr2  | TSS200  | 1.11 | (0.74; 1.66) | 6.1E-01 |
| cg00511641 | <i>CHD6</i>         | chr20 | Body    | 0.92 | (0.68; 1.26) | 6.1E-01 |
| cg13956369 | <i>SMARCD3</i>      | chr7  | TSS1500 | 1.09 | (0.78; 1.53) | 6.1E-01 |
| cg24896096 | <i>PTPRS</i>        | chr19 | Body    | 0.91 | (0.65; 1.29) | 6.1E-01 |
| cg07920930 | <i>PTPRN2</i>       | chr7  | TSS1500 | 0.92 | (0.68; 1.25) | 6.1E-01 |
| cg00390969 | <i>FBXO34</i>       | chr14 | TSS1500 | 1.09 | (0.78; 1.52) | 6.2E-01 |
| cg00390969 | <i>FBXO34</i>       | chr14 | TSS200  | 1.09 | (0.78; 1.52) | 6.2E-01 |
| cg22949256 | <i>SGIP1</i>        | chr1  | Body    | 0.87 | (0.5; 1.5)   | 6.2E-01 |
| cg03664025 | <i>TNRC6A</i>       | chr16 | ExonBnd | 0.9  | (0.6; 1.35)  | 6.2E-01 |



|            |                  |       |         |      |              |         |
|------------|------------------|-------|---------|------|--------------|---------|
| cg03664025 | <i>TNRC6A</i>    | chr16 | Body    | 0.9  | (0.6; 1.35)  | 6.2E-01 |
| cg10327399 | <i>TNRC18</i>    | chr7  | Body    | 0.92 | (0.68; 1.26) | 6.2E-01 |
| cg08802375 | <i>ATP6V0C</i>   | chr16 | 3'UTR   | 0.9  | (0.59; 1.36) | 6.2E-01 |
| cg03462926 | <i>ELAVL4</i>    | chr1  | 1stExon | 1.12 | (0.72; 1.72) | 6.2E-01 |
| cg03462926 | <i>ELAVL4</i>    | chr1  | Body    | 1.12 | (0.72; 1.72) | 6.2E-01 |
| cg03462926 | <i>ELAVL4</i>    | chr1  | 5'UTR   | 1.12 | (0.72; 1.72) | 6.2E-01 |
| cg05468345 | <i>CACNA1C</i>   | chr12 | Body    | 1.08 | (0.79; 1.49) | 6.2E-01 |
| cg25912957 | <i>PTPRN2</i>    | chr7  | Body    | 0.92 | (0.65; 1.29) | 6.2E-01 |
| cg03243701 | <i>CCDC80</i>    | chr3  | Body    | 1.09 | (0.79; 1.5)  | 6.2E-01 |
| cg17067988 | <i>PTPRN2</i>    | chr7  | Body    | 0.91 | (0.65; 1.3)  | 6.2E-01 |
| cg06690199 | <i>EIF2S1</i>    | chr14 | TSS200  | 1.07 | (0.82; 1.41) | 6.2E-01 |
| cg12113356 | <i>CCDC80</i>    | chr3  | 5'UTR   | 0.9  | (0.59; 1.37) | 6.2E-01 |
| cg12113356 | <i>CCDC80</i>    | chr3  | 1stExon | 0.9  | (0.59; 1.37) | 6.2E-01 |
| cg24319381 | <i>CPEB1</i>     | chr15 | TSS200  | 0.92 | (0.67; 1.27) | 6.2E-01 |
| cg18071075 | <i>WWOX</i>      | chr16 | Body    | 1.12 | (0.72; 1.73) | 6.2E-01 |
| cg20247421 | <i>CHD6</i>      | chr20 | 5'UTR   | 1.08 | (0.8; 1.45)  | 6.2E-01 |
| cg15374582 | <i>PTPRN2</i>    | chr7  | Body    | 1.09 | (0.77; 1.56) | 6.2E-01 |
| cg09118225 | <i>TENM2</i>     | chr5  | Body    | 0.9  | (0.58; 1.38) | 6.2E-01 |
| cg00239915 | <i>PTPRN2</i>    | chr7  | Body    | 0.91 | (0.64; 1.3)  | 6.2E-01 |
| cg15012939 | <i>PTPRN2</i>    | chr7  | Body    | 1.09 | (0.78; 1.51) | 6.2E-01 |
| cg21380084 | <i>PTPRN2</i>    | chr7  | Body    | 0.92 | (0.66; 1.28) | 6.2E-01 |
| cg16174779 | <i>TNFRSF11A</i> | chr18 | Body    | 1.1  | (0.75; 1.63) | 6.2E-01 |
| cg12283057 | <i>PDE8A</i>     | chr15 | Body    | 1.08 | (0.79; 1.48) | 6.2E-01 |
| cg22862635 | <i>PTPRN2</i>    | chr7  | Body    | 0.91 | (0.61; 1.34) | 6.2E-01 |
| cg18201351 | <i>NRXN1</i>     | chr2  | Body    | 1.09 | (0.78; 1.53) | 6.2E-01 |
| cg18201351 | <i>NRXN1</i>     | chr2  | TSS200  | 1.09 | (0.78; 1.53) | 6.2E-01 |
| cg08613634 | <i>RNU5E-1</i>   | chr5  | Body    | 1.09 | (0.78; 1.53) | 6.2E-01 |
| cg03362590 | <i>FBXO34</i>    | chr14 | TSS200  | 1.09 | (0.78; 1.52) | 6.2E-01 |
| cg03362590 | <i>FBXO34</i>    | chr14 | 5'UTR   | 1.09 | (0.78; 1.52) | 6.2E-01 |
| cg27650540 | <i>CUX2</i>      | chr12 | Body    | 0.92 | (0.65; 1.29) | 6.2E-01 |
| cg23455837 | <i>PTPRN2</i>    | chr7  | Body    | 0.92 | (0.67; 1.26) | 6.2E-01 |
| cg14795305 | <i>SMARCD3</i>   | chr7  | TSS1500 | 0.87 | (0.49; 1.53) | 6.2E-01 |
| cg06957181 | <i>AKAP3</i>     | chr12 | TSS1500 | 0.91 | (0.64; 1.3)  | 6.2E-01 |
| cg09340935 | <i>CACNA1C</i>   | chr12 | Body    | 0.92 | (0.65; 1.29) | 6.2E-01 |
| cg06679384 | <i>PTPRN2</i>    | chr7  | Body    | 1.1  | (0.75; 1.64) | 6.2E-01 |
| cg21538684 | <i>PHACTR1</i>   | chr6  | Body    | 0.93 | (0.69; 1.25) | 6.2E-01 |
| cg04396803 | <i>COL5A2</i>    | chr2  | Body    | 0.88 | (0.53; 1.47) | 6.2E-01 |
| cg23660611 | <i>PTPRS</i>     | chr19 | Body    | 1.12 | (0.72; 1.75) | 6.2E-01 |
| cg21660826 | <i>PTPRN2</i>    | chr7  | Body    | 0.92 | (0.66; 1.28) | 6.2E-01 |
| cg13594075 | <i>NRXN1</i>     | chr2  | TSS200  | 0.93 | (0.68; 1.26) | 6.2E-01 |
| cg20353780 | <i>TAOK3</i>     | chr12 | 3'UTR   | 0.92 | (0.65; 1.3)  | 6.2E-01 |
| cg26570257 | <i>SUSD4</i>     | chr1  | Body    | 1.15 | (0.66; 1.99) | 6.2E-01 |
| cg09239716 | <i>TNFRSF10C</i> | chr8  | Body    | 1.1  | (0.76; 1.57) | 6.2E-01 |
| cg19713140 | <i>PTPRN2</i>    | chr7  | Body    | 1.08 | (0.79; 1.49) | 6.2E-01 |
| cg22128328 | <i>PTPRN2</i>    | chr7  | Body    | 0.92 | (0.67; 1.27) | 6.2E-01 |
| cg26338159 | <i>CPEB1</i>     | chr15 | Body    | 1.08 | (0.79; 1.48) | 6.2E-01 |
| cg16238796 | <i>TNRC18</i>    | chr7  | 5'UTR   | 0.92 | (0.66; 1.28) | 6.2E-01 |
| cg24408488 | <i>NOL4L</i>     | chr20 | Body    | 0.92 | (0.65; 1.29) | 6.2E-01 |
| cg01162378 | <i>CDH11</i>     | chr16 | 5'UTR   | 1.09 | (0.78; 1.53) | 6.2E-01 |
| cg17902551 | <i>CACNA1C</i>   | chr12 | 3'UTR   | 0.92 | (0.67; 1.27) | 6.2E-01 |
| cg13305273 | <i>PTPRN2</i>    | chr7  | Body    | 1.11 | (0.73; 1.71) | 6.2E-01 |
| cg22517801 | <i>PTPRN2</i>    | chr7  | Body    | 0.91 | (0.64; 1.31) | 6.2E-01 |
| cg22769317 | <i>FSTL1</i>     | chr3  | TSS1500 | 1.09 | (0.78; 1.51) | 6.2E-01 |
| cg01613977 | <i>AKAP13</i>    | chr15 | Body    | 0.9  | (0.6; 1.35)  | 6.2E-01 |
| cg05254518 | <i>AKAP13</i>    | chr15 | Body    | 1.09 | (0.78; 1.52) | 6.2E-01 |
| cg08415819 | <i>NRXN1</i>     | chr2  | Body    | 1.08 | (0.78; 1.5)  | 6.2E-01 |
| cg18379569 | <i>WWOX</i>      | chr16 | Body    | 0.91 | (0.61; 1.34) | 6.2E-01 |
| cg00443596 | <i>NOL4</i>      | chr18 | Body    | 1.12 | (0.72; 1.75) | 6.2E-01 |
| cg00443596 | <i>NOL4</i>      | chr18 | TSS200  | 1.12 | (0.72; 1.75) | 6.2E-01 |
| cg11502736 | <i>CEP350</i>    | chr1  | TSS200  | 1.09 | (0.78; 1.52) | 6.2E-01 |
| cg07859489 | <i>PTPRN2</i>    | chr7  | Body    | 0.93 | (0.71; 1.23) | 6.2E-01 |



|            |                 |       |         |      |              |         |
|------------|-----------------|-------|---------|------|--------------|---------|
| cg08189280 | <i>NRXN1</i>    | chr2  | Body    | 1.08 | (0.79; 1.48) | 6.2E-01 |
| cg04954797 | <i>PTPRN2</i>   | chr7  | Body    | 1.08 | (0.79; 1.47) | 6.2E-01 |
| cg03615913 | <i>PTPRS</i>    | chr19 | 5'UTR   | 0.92 | (0.66; 1.28) | 6.2E-01 |
| cg00469083 | <i>WVOX</i>     | chr16 | Body    | 1.08 | (0.8; 1.46)  | 6.2E-01 |
| cg27128939 | <i>SUGCT</i>    | chr7  | Body    | 0.81 | (0.35; 1.88) | 6.2E-01 |
| cg07605211 | <i>SUSD4</i>    | chr1  | TSS1500 | 0.91 | (0.62; 1.34) | 6.2E-01 |
| cg19019380 | <i>PTPRN2</i>   | chr7  | Body    | 0.93 | (0.68; 1.26) | 6.2E-01 |
| cg12741309 | <i>ATF7</i>     | chr12 | 5'UTR   | 0.92 | (0.65; 1.3)  | 6.2E-01 |
| cg12741309 | <i>ATF7</i>     | chr12 | Body    | 0.92 | (0.65; 1.3)  | 6.2E-01 |
| cg09831055 | <i>MEX3A</i>    | chr1  | Body    | 0.92 | (0.67; 1.27) | 6.2E-01 |
| cg26604191 | <i>TNRC18</i>   | chr7  | Body    | 0.92 | (0.65; 1.3)  | 6.2E-01 |
| cg14376625 | <i>CUX2</i>     | chr12 | Body    | 1.09 | (0.77; 1.55) | 6.2E-01 |
| cg16740746 | <i>WVOX</i>     | chr16 | Body    | 0.91 | (0.63; 1.32) | 6.2E-01 |
| cg15407730 | <i>ATF7IP</i>   | chr12 | 5'UTR   | 0.88 | (0.53; 1.46) | 6.2E-01 |
| cg15407730 | <i>ATF7IP</i>   | chr12 | Body    | 0.88 | (0.53; 1.46) | 6.2E-01 |
| cg09610766 | <i>ALCAM</i>    | chr3  | Body    | 0.92 | (0.64; 1.31) | 6.3E-01 |
| cg14350197 | <i>BRUNOL4</i>  | chr18 | TSS1500 | 0.91 | (0.61; 1.34) | 6.3E-01 |
| cg24166295 | <i>ZNF704</i>   | chr8  | Body    | 1.09 | (0.78; 1.52) | 6.3E-01 |
| cg08599096 | <i>PTPRN2</i>   | chr7  | Body    | 0.84 | (0.42; 1.69) | 6.3E-01 |
| cg09500171 | <i>ATP8A1</i>   | chr4  | Body    | 0.92 | (0.66; 1.29) | 6.3E-01 |
| cg04595854 | <i>TENM2</i>    | chr5  | Body    | 1.09 | (0.76; 1.57) | 6.3E-01 |
| cg26130656 | <i>CACNA1C</i>  | chr12 | Body    | 0.88 | (0.51; 1.49) | 6.3E-01 |
| cg15819924 | <i>PTPRN2</i>   | chr7  | Body    | 1.09 | (0.78; 1.52) | 6.3E-01 |
| cg07535790 | <i>ZBTB20</i>   | chr3  | Body    | 0.86 | (0.46; 1.6)  | 6.3E-01 |
| cg07535790 | <i>ZBTB20</i>   | chr3  | 5'UTR   | 0.86 | (0.46; 1.6)  | 6.3E-01 |
| cg12102607 | <i>GNA12</i>    | chr7  | Body    | 1.08 | (0.79; 1.47) | 6.3E-01 |
| cg12102607 | <i>GNA12</i>    | chr7  | TSS200  | 1.08 | (0.79; 1.47) | 6.3E-01 |
| cg05121010 | <i>POU2F1</i>   | chr1  | Body    | 1.12 | (0.72; 1.74) | 6.3E-01 |
| cg16502202 | <i>AKAP13</i>   | chr15 | Body    | 0.92 | (0.65; 1.29) | 6.3E-01 |
| cg21952241 | <i>CHD6</i>     | chr20 | 3'UTR   | 1.1  | (0.74; 1.65) | 6.3E-01 |
| cg13471521 | <i>TNFRSF1B</i> | chr1  | Body    | 1.11 | (0.73; 1.7)  | 6.3E-01 |
| cg22510091 | <i>RAP1B</i>    | chr12 | 5'UTR   | 0.91 | (0.64; 1.31) | 6.3E-01 |
| cg09633353 | <i>RTN4</i>     | chr2  | Body    | 1.12 | (0.71; 1.75) | 6.3E-01 |
| cg09633353 | <i>RTN4</i>     | chr2  | 5'UTR   | 1.12 | (0.71; 1.75) | 6.3E-01 |
| cg12877853 | <i>PTPRN2</i>   | chr7  | Body    | 0.92 | (0.67; 1.27) | 6.3E-01 |
| cg01743793 | <i>TNFRSF19</i> | chr13 | 5'UTR   | 0.92 | (0.67; 1.27) | 6.3E-01 |
| cg01743793 | <i>TNFRSF19</i> | chr13 | Body    | 0.92 | (0.67; 1.27) | 6.3E-01 |
| cg23634928 | <i>PTPRN2</i>   | chr7  | Body    | 0.93 | (0.68; 1.26) | 6.3E-01 |
| cg16168876 | <i>CACNA1C</i>  | chr12 | Body    | 1.13 | (0.69; 1.85) | 6.3E-01 |
| cg07168181 | <i>GNA12</i>    | chr7  | TSS200  | 0.92 | (0.66; 1.28) | 6.3E-01 |
| cg26387435 | <i>CNTNAP2</i>  | chr7  | Body    | 1.08 | (0.79; 1.47) | 6.3E-01 |
| cg02245612 | <i>PTPRS</i>    | chr19 | 5'UTR   | 1.08 | (0.78; 1.5)  | 6.3E-01 |
| cg22370057 | <i>PHACTR1</i>  | chr6  | Body    | 1.09 | (0.77; 1.56) | 6.3E-01 |
| cg02538280 | <i>PTPRN2</i>   | chr7  | Body    | 1.09 | (0.77; 1.53) | 6.3E-01 |
| cg03960313 | <i>TNFRSF19</i> | chr13 | 5'UTR   | 0.92 | (0.66; 1.29) | 6.3E-01 |
| cg03960313 | <i>TNFRSF19</i> | chr13 | TSS1500 | 0.92 | (0.66; 1.29) | 6.3E-01 |
| cg02336175 | <i>ZNF704</i>   | chr8  | 5'UTR   | 0.93 | (0.7; 1.24)  | 6.3E-01 |
| cg02336175 | <i>ZNF704</i>   | chr8  | 1stExon | 0.93 | (0.7; 1.24)  | 6.3E-01 |
| cg14595244 | <i>SRSF12</i>   | chr6  | TSS1500 | 0.93 | (0.69; 1.25) | 6.3E-01 |
| cg20773751 | <i>AKAP13</i>   | chr15 | Body    | 1.09 | (0.77; 1.54) | 6.3E-01 |
| cg20773751 | <i>AKAP13</i>   | chr15 | 5'UTR   | 1.09 | (0.77; 1.54) | 6.3E-01 |
| cg06537115 | <i>TENM2</i>    | chr5  | Body    | 0.91 | (0.64; 1.31) | 6.3E-01 |
| cg16486501 | <i>PTPRN2</i>   | chr7  | Body    | 1.1  | (0.74; 1.64) | 6.3E-01 |
| cg07796563 | <i>CHFR</i>     | chr12 | Body    | 0.91 | (0.62; 1.33) | 6.3E-01 |
| cg02866870 | <i>ALCAM</i>    | chr3  | TSS200  | 1.1  | (0.76; 1.59) | 6.3E-01 |
| cg12700283 | <i>TNRC6C</i>   | chr17 | 5'UTR   | 1.08 | (0.79; 1.49) | 6.3E-01 |
| cg18559618 | <i>RTN4RL1</i>  | chr17 | Body    | 0.88 | (0.52; 1.48) | 6.3E-01 |
| cg05062510 | <i>PTPRN2</i>   | chr7  | Body    | 0.92 | (0.66; 1.29) | 6.3E-01 |
| cg07082645 | <i>CACNA1C</i>  | chr12 | Body    | 0.91 | (0.64; 1.32) | 6.3E-01 |
| cg07271936 | <i>WVOX</i>     | chr16 | Body    | 0.92 | (0.65; 1.29) | 6.3E-01 |
| cg01125152 | <i>WVOX</i>     | chr16 | Body    | 1.08 | (0.78; 1.5)  | 6.3E-01 |



|            |                  |       |         |      |              |         |
|------------|------------------|-------|---------|------|--------------|---------|
| cg25996573 | <i>RTN4</i>      | chr2  | Body    | 1.18 | (0.6; 2.32)  | 6.3E-01 |
| cg05548749 | <i>ARID1A</i>    | chr1  | Body    | 0.92 | (0.67; 1.28) | 6.3E-01 |
| cg04484243 | <i>AKAP13</i>    | chr15 | 5'UTR   | 1.09 | (0.76; 1.58) | 6.3E-01 |
| cg07729875 | <i>CUX2</i>      | chr12 | Body    | 0.91 | (0.62; 1.34) | 6.3E-01 |
| cg04868583 | <i>ATP8A1</i>    | chr4  | Body    | 0.92 | (0.66; 1.29) | 6.3E-01 |
| cg16799961 | <i>TXNDC9</i>    | chr2  | TSS200  | 1.07 | (0.8; 1.44)  | 6.3E-01 |
| cg05840629 | <i>DMXL2</i>     | chr15 | TSS1500 | 0.9  | (0.58; 1.39) | 6.3E-01 |
| cg05987961 | <i>PTPRN2</i>    | chr7  | Body    | 0.92 | (0.66; 1.29) | 6.3E-01 |
| cg15804825 | <i>CPEB1</i>     | chr15 | ExonBnd | 0.91 | (0.63; 1.33) | 6.3E-01 |
| cg15804825 | <i>CPEB1</i>     | chr15 | Body    | 0.91 | (0.63; 1.33) | 6.3E-01 |
| cg15804825 | <i>CPEB1</i>     | chr15 | 5'UTR   | 0.91 | (0.63; 1.33) | 6.3E-01 |
| cg07788493 | <i>AKAP13</i>    | chr15 | Body    | 0.85 | (0.44; 1.64) | 6.3E-01 |
| cg19303637 | <i>TNFRSF19</i>  | chr13 | 5'UTR   | 1.13 | (0.68; 1.89) | 6.3E-01 |
| cg24052530 | <i>ERI3</i>      | chr1  | 1stExon | 1.08 | (0.78; 1.5)  | 6.3E-01 |
| cg24052530 | <i>ERI3</i>      | chr1  | 5'UTR   | 1.08 | (0.78; 1.5)  | 6.3E-01 |
| cg23784855 | <i>ZNF704</i>    | chr8  | TSS200  | 1.1  | (0.75; 1.59) | 6.3E-01 |
| cg16648740 | <i>UBE2E2</i>    | chr3  | Body    | 0.92 | (0.65; 1.3)  | 6.3E-01 |
| cg20734791 | <i>SUGCT</i>     | chr7  | Body    | 0.87 | (0.48; 1.56) | 6.3E-01 |
| cg00531180 | <i>NOL4L</i>     | chr20 | Body    | 1.12 | (0.7; 1.79)  | 6.3E-01 |
| cg15318881 | <i>TENM2</i>     | chr5  | Body    | 0.92 | (0.66; 1.28) | 6.3E-01 |
| cg00003241 | <i>PTPRN2</i>    | chr7  | Body    | 1.08 | (0.79; 1.47) | 6.3E-01 |
| cg24364668 | <i>CCDC80</i>    | chr3  | 5'UTR   | 0.9  | (0.59; 1.38) | 6.3E-01 |
| cg24364668 | <i>CCDC80</i>    | chr3  | 1stExon | 0.9  | (0.59; 1.38) | 6.3E-01 |
| cg02699090 | <i>PTPRN2</i>    | chr7  | Body    | 0.94 | (0.71; 1.23) | 6.3E-01 |
| cg24490542 | <i>CSMD2</i>     | chr1  | Body    | 1.11 | (0.73; 1.69) | 6.3E-01 |
| cg20557710 | <i>CACNA1C</i>   | chr12 | Body    | 1.09 | (0.77; 1.55) | 6.3E-01 |
| cg10537847 | <i>TXNDC9</i>    | chr2  | TSS1500 | 0.93 | (0.68; 1.26) | 6.3E-01 |
| cg02111099 | <i>ERI3</i>      | chr1  | Body    | 0.92 | (0.65; 1.3)  | 6.3E-01 |
| cg20915973 | <i>ATP8A1</i>    | chr4  | TSS1500 | 0.91 | (0.63; 1.33) | 6.3E-01 |
| cg03295083 | <i>NRXN1</i>     | chr2  | Body    | 0.92 | (0.66; 1.29) | 6.3E-01 |
| cg03295083 | <i>NRXN1</i>     | chr2  | TSS200  | 0.92 | (0.66; 1.29) | 6.3E-01 |
| cg01394671 | <i>PTPRN2</i>    | chr7  | TSS200  | 1.08 | (0.79; 1.48) | 6.3E-01 |
| cg04998702 | <i>MEIS2</i>     | chr15 | TSS1500 | 1.09 | (0.75; 1.59) | 6.3E-01 |
| cg04998702 | <i>MEIS2</i>     | chr15 | 5'UTR   | 1.09 | (0.75; 1.59) | 6.3E-01 |
| cg04998702 | <i>MEIS2</i>     | chr15 | Body    | 1.09 | (0.75; 1.59) | 6.3E-01 |
| cg04998702 | <i>MEIS2</i>     | chr15 | ExonBnd | 1.09 | (0.75; 1.59) | 6.3E-01 |
| cg04998702 | <i>MEIS2</i>     | chr15 | TSS200  | 1.09 | (0.75; 1.59) | 6.3E-01 |
| cg04998702 | <i>MEIS2</i>     | chr15 | 1stExon | 1.09 | (0.75; 1.59) | 6.3E-01 |
| cg00103865 | <i>TNFRSF1A</i>  | chr12 | Body    | 0.92 | (0.65; 1.3)  | 6.3E-01 |
| cg16014651 | <i>TNRC18</i>    | chr7  | Body    | 0.82 | (0.37; 1.83) | 6.3E-01 |
| cg12875205 | <i>PTPRN2</i>    | chr7  | Body    | 1.07 | (0.8; 1.45)  | 6.3E-01 |
| cg06293787 | <i>MTNR1A</i>    | chr4  | TSS200  | 0.9  | (0.57; 1.4)  | 6.3E-01 |
| cg11247812 | <i>CSMD2</i>     | chr1  | Body    | 0.92 | (0.65; 1.3)  | 6.3E-01 |
| cg24388383 | <i>TNFRSF11A</i> | chr18 | Body    | 1.09 | (0.76; 1.57) | 6.4E-01 |
| cg10227810 | <i>RTN4R</i>     | chr22 | Body    | 1.08 | (0.79; 1.47) | 6.4E-01 |
| cg05305155 | <i>PTPRN2</i>    | chr7  | Body    | 0.92 | (0.66; 1.29) | 6.4E-01 |
| cg23864120 | <i>PTPRS</i>     | chr19 | Body    | 0.93 | (0.68; 1.27) | 6.4E-01 |
| cg18028379 | <i>CDH13</i>     | chr16 | Body    | 0.85 | (0.43; 1.68) | 6.4E-01 |
| cg08006263 | <i>NOL4L</i>     | chr20 | Body    | 0.91 | (0.62; 1.34) | 6.4E-01 |
| cg21276043 | <i>AKAP13</i>    | chr15 | 5'UTR   | 1.09 | (0.76; 1.57) | 6.4E-01 |
| cg23337361 | <i>PHACTR1</i>   | chr6  | Body    | 1.09 | (0.76; 1.55) | 6.4E-01 |
| cg24646035 | <i>PHACTR1</i>   | chr6  | Body    | 0.93 | (0.68; 1.27) | 6.4E-01 |
| cg20135776 | <i>ARID1A</i>    | chr1  | Body    | 1.08 | (0.8; 1.45)  | 6.4E-01 |
| cg15912010 | <i>NRXN1</i>     | chr2  | Body    | 0.92 | (0.67; 1.28) | 6.4E-01 |
| cg05902531 | <i>CTDSP2</i>    | chr12 | Body    | 0.92 | (0.66; 1.29) | 6.4E-01 |
| cg11392877 | <i>PDE8A</i>     | chr15 | TSS1500 | 1.08 | (0.79; 1.48) | 6.4E-01 |
| cg18849847 | <i>PTPRN2</i>    | chr7  | Body    | 1.08 | (0.79; 1.47) | 6.4E-01 |
| cg03648523 | <i>CDH13</i>     | chr16 | 5'UTR   | 0.93 | (0.67; 1.27) | 6.4E-01 |
| cg03648523 | <i>CDH13</i>     | chr16 | Body    | 0.93 | (0.67; 1.27) | 6.4E-01 |
| cg04006520 | <i>CACNA1C</i>   | chr12 | Body    | 0.9  | (0.58; 1.39) | 6.4E-01 |
| cg07061916 | <i>DACH1</i>     | chr13 | TSS200  | 0.92 | (0.65; 1.31) | 6.4E-01 |



|            |                  |       |         |      |              |         |
|------------|------------------|-------|---------|------|--------------|---------|
| cg22676516 | <i>PTPRN2</i>    | chr7  | Body    | 1.09 | (0.77; 1.53) | 6.4E-01 |
| cg05847926 | <i>POU2F1</i>    | chr1  | Body    | 1.08 | (0.79; 1.48) | 6.4E-01 |
| cg05847926 | <i>POU2F1</i>    | chr1  | TSS1500 | 1.08 | (0.79; 1.48) | 6.4E-01 |
| cg23649326 | <i>RNU5E-1</i>   | chr5  | Body    | 1.1  | (0.74; 1.63) | 6.4E-01 |
| cg07688779 | <i>MEIS2</i>     | chr15 | 5'UTR   | 0.91 | (0.61; 1.35) | 6.4E-01 |
| cg07688779 | <i>MEIS2</i>     | chr15 | 1stExon | 0.91 | (0.61; 1.35) | 6.4E-01 |
| cg07688779 | <i>MEIS2</i>     | chr15 | Body    | 0.91 | (0.61; 1.35) | 6.4E-01 |
| cg07688779 | <i>MEIS2</i>     | chr15 | TSS1500 | 0.91 | (0.61; 1.35) | 6.4E-01 |
| cg02481065 | <i>ELAVL4</i>    | chr1  | Body    | 1.09 | (0.76; 1.57) | 6.4E-01 |
| cg27529656 | <i>FBXO32</i>    | chr8  | 5'UTR   | 1.11 | (0.71; 1.74) | 6.4E-01 |
| cg27529656 | <i>FBXO32</i>    | chr8  | Body    | 1.11 | (0.71; 1.74) | 6.4E-01 |
| cg00267862 | <i>TNRC18</i>    | chr7  | Body    | 1.07 | (0.8; 1.45)  | 6.4E-01 |
| cg00806634 | <i>CTNND2</i>    | chr5  | Body    | 1.09 | (0.76; 1.55) | 6.4E-01 |
| cg22870666 | <i>DMXL2</i>     | chr15 | 5'UTR   | 1.08 | (0.78; 1.49) | 6.4E-01 |
| cg22870666 | <i>DMXL2</i>     | chr15 | 1stExon | 1.08 | (0.78; 1.49) | 6.4E-01 |
| cg15074728 | <i>ZBTB20</i>    | chr3  | Body    | 0.92 | (0.65; 1.31) | 6.4E-01 |
| cg15074728 | <i>ZBTB20</i>    | chr3  | 5'UTR   | 0.92 | (0.65; 1.31) | 6.4E-01 |
| cg05038209 | <i>FBXO31</i>    | chr16 | TSS1500 | 0.92 | (0.64; 1.31) | 6.4E-01 |
| cg09038266 | <i>WWOX</i>      | chr16 | Body    | 0.92 | (0.66; 1.29) | 6.4E-01 |
| cg12724498 | <i>PTPRN2</i>    | chr7  | Body    | 0.93 | (0.7; 1.25)  | 6.4E-01 |
| cg12167526 | <i>NRXN1</i>     | chr2  | Body    | 0.93 | (0.67; 1.27) | 6.4E-01 |
| cg05199346 | <i>TNFRSF1A</i>  | chr12 | Body    | 0.9  | (0.57; 1.41) | 6.4E-01 |
| cg12134994 | <i>TNFRSF10D</i> | chr8  | Body    | 1.11 | (0.73; 1.68) | 6.4E-01 |
| cg09532041 | <i>CDH13</i>     | chr16 | 5'UTR   | 1.1  | (0.73; 1.66) | 6.4E-01 |
| cg09532041 | <i>CDH13</i>     | chr16 | Body    | 1.1  | (0.73; 1.66) | 6.4E-01 |
| cg10368049 | <i>COL1A2</i>    | chr7  | TSS200  | 1.08 | (0.79; 1.47) | 6.4E-01 |
| cg05879505 | <i>RTN4RL1</i>   | chr17 | Body    | 1.11 | (0.72; 1.72) | 6.4E-01 |
| cg02093647 | <i>ACVR2A</i>    | chr2  | TSS200  | 0.92 | (0.65; 1.3)  | 6.4E-01 |
| cg05979819 | <i>WWOX</i>      | chr16 | TSS200  | 1.08 | (0.78; 1.49) | 6.4E-01 |
| cg27069263 | <i>RTN4</i>      | chr2  | TSS1500 | 0.93 | (0.67; 1.27) | 6.4E-01 |
| cg07819148 | <i>CACNA1C</i>   | chr12 | Body    | 0.92 | (0.66; 1.3)  | 6.4E-01 |
| cg09048009 | <i>RTN4</i>      | chr2  | Body    | 1.1  | (0.74; 1.62) | 6.4E-01 |
| cg01726608 | <i>PTPRN2</i>    | chr7  | Body    | 0.93 | (0.68; 1.26) | 6.4E-01 |
| cg17799033 | <i>PTPRN2</i>    | chr7  | Body    | 0.92 | (0.64; 1.32) | 6.4E-01 |
| cg00345522 | <i>NRXN1</i>     | chr2  | TSS1500 | 0.93 | (0.7; 1.25)  | 6.4E-01 |
| cg03368634 | <i>CREBBP</i>    | chr16 | Body    | 1.08 | (0.78; 1.49) | 6.4E-01 |
| cg22420514 | <i>PTPRN2</i>    | chr7  | Body    | 0.91 | (0.62; 1.34) | 6.4E-01 |
| cg03105604 | <i>CDH13</i>     | chr16 | 5'UTR   | 1.08 | (0.77; 1.52) | 6.4E-01 |
| cg03105604 | <i>CDH13</i>     | chr16 | Body    | 1.08 | (0.77; 1.52) | 6.4E-01 |
| cg12084908 | <i>SLC16A9</i>   | chr10 | Body    | 1.07 | (0.8; 1.43)  | 6.4E-01 |
| cg18711246 | <i>DACH1</i>     | chr13 | Body    | 1.09 | (0.76; 1.55) | 6.4E-01 |
| cg17811116 | <i>TNRC18</i>    | chr7  | Body    | 1.1  | (0.74; 1.63) | 6.4E-01 |
| cg22381955 | <i>CHFR</i>      | chr12 | Body    | 1.09 | (0.75; 1.6)  | 6.4E-01 |
| cg24351382 | <i>PTPRN2</i>    | chr7  | Body    | 1.08 | (0.77; 1.53) | 6.4E-01 |
| cg17689778 | <i>PTPRS</i>     | chr19 | Body    | 0.92 | (0.64; 1.32) | 6.4E-01 |
| cg11330134 | <i>CDH13</i>     | chr16 | 5'UTR   | 0.89 | (0.53; 1.48) | 6.4E-01 |
| cg11330134 | <i>CDH13</i>     | chr16 | Body    | 0.89 | (0.53; 1.48) | 6.4E-01 |
| cg03232056 | <i>PTPRN2</i>    | chr7  | Body    | 1.09 | (0.76; 1.55) | 6.4E-01 |
| cg05619202 | <i>TNFRSF11A</i> | chr18 | Body    | 0.91 | (0.63; 1.33) | 6.4E-01 |
| cg15384060 | <i>NRXN1</i>     | chr2  | 5'UTR   | 0.92 | (0.63; 1.33) | 6.4E-01 |
| cg15384060 | <i>NRXN1</i>     | chr2  | 1stExon | 0.92 | (0.63; 1.33) | 6.4E-01 |
| cg24932457 | <i>TNR</i>       | chr1  | 5'UTR   | 1.1  | (0.74; 1.61) | 6.4E-01 |
| cg06950987 | <i>RTN4R</i>     | chr22 | Body    | 0.91 | (0.62; 1.34) | 6.4E-01 |
| cg00834924 | <i>AKAP13</i>    | chr15 | 5'UTR   | 0.93 | (0.7; 1.25)  | 6.4E-01 |
| cg07642125 | <i>WWOX</i>      | chr16 | Body    | 1.09 | (0.75; 1.59) | 6.4E-01 |
| cg20202430 | <i>FBXO32</i>    | chr8  | TSS1500 | 0.92 | (0.65; 1.3)  | 6.4E-01 |
| cg20202430 | <i>FBXO32</i>    | chr8  | Body    | 0.92 | (0.65; 1.3)  | 6.4E-01 |
| cg21797223 | <i>CTNND2</i>    | chr5  | Body    | 0.93 | (0.68; 1.26) | 6.4E-01 |
| cg10737671 | <i>PTPRN2</i>    | chr7  | Body    | 0.92 | (0.63; 1.33) | 6.4E-01 |
| cg25478157 | <i>CEP350</i>    | chr1  | 5'UTR   | 0.93 | (0.69; 1.26) | 6.4E-01 |
| cg05307536 | <i>WWOX</i>      | chr16 | Body    | 0.91 | (0.63; 1.34) | 6.4E-01 |



|            |                  |       |         |      |              |         |
|------------|------------------|-------|---------|------|--------------|---------|
| cg10756457 | <i>NRXN1</i>     | chr2  | Body    | 0.87 | (0.48; 1.57) | 6.4E-01 |
| cg03761291 | <i>CREBBP</i>    | chr16 | Body    | 1.1  | (0.74; 1.63) | 6.4E-01 |
| cg21628661 | <i>ARID1A</i>    | chr1  | Body    | 1.08 | (0.78; 1.51) | 6.4E-01 |
| cg02408103 | <i>CTDSP2</i>    | chr12 | TSS1500 | 0.92 | (0.65; 1.31) | 6.4E-01 |
| cg18833170 | <i>TNRC6A</i>    | chr16 | Body    | 1.09 | (0.76; 1.56) | 6.4E-01 |
| cg24824371 | <i>PTPRN2</i>    | chr7  | Body    | 0.93 | (0.67; 1.28) | 6.4E-01 |
| cg03042149 | <i>PDE8A</i>     | chr15 | TSS1500 | 0.94 | (0.72; 1.23) | 6.4E-01 |
| cg19877157 | <i>GNA12</i>     | chr7  | Body    | 1.09 | (0.76; 1.55) | 6.5E-01 |
| cg12602439 | <i>RECQL5</i>    | chr17 | 1stExon | 1.08 | (0.79; 1.47) | 6.5E-01 |
| cg12602439 | <i>RECQL5</i>    | chr17 | 5'UTR   | 1.08 | (0.79; 1.47) | 6.5E-01 |
| cg21090796 | <i>CPEB1</i>     | chr15 | 1stExon | 0.93 | (0.68; 1.28) | 6.5E-01 |
| cg21090796 | <i>CPEB1</i>     | chr15 | Body    | 0.93 | (0.68; 1.28) | 6.5E-01 |
| cg21090796 | <i>CPEB1</i>     | chr15 | 5'UTR   | 0.93 | (0.68; 1.28) | 6.5E-01 |
| cg01511814 | <i>RECQL5</i>    | chr17 | Body    | 0.92 | (0.66; 1.29) | 6.5E-01 |
| cg21255406 | <i>TAOK3</i>     | chr12 | Body    | 1.08 | (0.78; 1.5)  | 6.5E-01 |
| cg03425093 | <i>GNA12</i>     | chr7  | Body    | 0.91 | (0.62; 1.34) | 6.5E-01 |
| cg24176540 | <i>TNFRSF10B</i> | chr8  | Body    | 0.92 | (0.64; 1.31) | 6.5E-01 |
| cg03245462 | <i>CTNND2</i>    | chr5  | Body    | 0.93 | (0.69; 1.26) | 6.5E-01 |
| cg15243478 | <i>CACNA1C</i>   | chr12 | Body    | 0.9  | (0.56; 1.43) | 6.5E-01 |
| cg25107959 | <i>TNRC6B</i>    | chr22 | Body    | 1.1  | (0.72; 1.69) | 6.5E-01 |
| cg11439695 | <i>CACNA1C</i>   | chr12 | Body    | 0.85 | (0.43; 1.69) | 6.5E-01 |
| cg00494949 | <i>TNRC18</i>    | chr7  | Body    | 1.08 | (0.77; 1.53) | 6.5E-01 |
| cg16301036 | <i>TAOK3</i>     | chr12 | 5'UTR   | 0.9  | (0.57; 1.42) | 6.5E-01 |
| cg22735402 | <i>CNTNAP2</i>   | chr7  | Body    | 0.91 | (0.61; 1.36) | 6.5E-01 |
| cg01230254 | <i>FBXO31</i>    | chr16 | Body    | 0.92 | (0.66; 1.3)  | 6.5E-01 |
| cg04296289 | <i>SGIP1</i>     | chr1  | Body    | 0.92 | (0.64; 1.32) | 6.5E-01 |
| cg11019319 | <i>DCUN1D4</i>   | chr4  | Body    | 0.92 | (0.66; 1.3)  | 6.5E-01 |
| cg11019319 | <i>DCUN1D4</i>   | chr4  | 5'UTR   | 0.92 | (0.66; 1.3)  | 6.5E-01 |
| cg11414986 | <i>POU2F1</i>    | chr1  | Body    | 0.93 | (0.68; 1.27) | 6.5E-01 |
| cg26975787 | <i>CACNA1C</i>   | chr12 | Body    | 1.1  | (0.74; 1.63) | 6.5E-01 |
| cg03170192 | <i>CTDSP2</i>    | chr12 | Body    | 1.11 | (0.72; 1.71) | 6.5E-01 |
| cg13268132 | <i>TNFRSF11B</i> | chr8  | 1stExon | 0.93 | (0.67; 1.28) | 6.5E-01 |
| cg05682336 | <i>BARX2</i>     | chr11 | Body    | 1.08 | (0.78; 1.5)  | 6.5E-01 |
| cg05694921 | <i>PTPRU</i>     | chr1  | Body    | 1.1  | (0.73; 1.66) | 6.5E-01 |
| cg25794982 | <i>WWOX</i>      | chr16 | Body    | 0.93 | (0.67; 1.28) | 6.5E-01 |
| cg06037603 | <i>TNRC6A</i>    | chr16 | Body    | 0.91 | (0.62; 1.35) | 6.5E-01 |
| cg02650170 | <i>TENM2</i>     | chr5  | Body    | 0.91 | (0.62; 1.35) | 6.5E-01 |
| cg24794322 | <i>PTPRN2</i>    | chr7  | Body    | 1.08 | (0.77; 1.51) | 6.5E-01 |
| cg08162701 | <i>SUGCT</i>     | chr7  | Body    | 1.1  | (0.73; 1.67) | 6.5E-01 |
| cg12593421 | <i>AKAP13</i>    | chr15 | Body    | 1.09 | (0.75; 1.57) | 6.5E-01 |
| cg08912210 | <i>CREBBP</i>    | chr16 | Body    | 0.92 | (0.63; 1.34) | 6.5E-01 |
| cg02843755 | <i>CTDSPL</i>    | chr3  | TSS1500 | 1.08 | (0.79; 1.47) | 6.5E-01 |
| cg06474489 | <i>PTPRU</i>     | chr1  | ExonBnd | 0.9  | (0.58; 1.41) | 6.5E-01 |
| cg06474489 | <i>PTPRU</i>     | chr1  | Body    | 0.9  | (0.58; 1.41) | 6.5E-01 |
| cg00599124 | <i>FBXO31</i>    | chr16 | Body    | 1.07 | (0.8; 1.43)  | 6.5E-01 |
| cg13617776 | <i>PTPRS</i>     | chr19 | Body    | 0.93 | (0.66; 1.3)  | 6.5E-01 |
| cg16583458 | <i>CUX2</i>      | chr12 | Body    | 0.93 | (0.67; 1.28) | 6.5E-01 |
| cg20569999 | <i>CTDSP2</i>    | chr12 | Body    | 1.09 | (0.76; 1.57) | 6.5E-01 |
| cg06380249 | <i>PTPRN2</i>    | chr7  | Body    | 0.91 | (0.61; 1.36) | 6.5E-01 |
| cg05151055 | <i>CREBBP</i>    | chr16 | Body    | 1.08 | (0.78; 1.48) | 6.5E-01 |
| cg12494138 | <i>PTPRN2</i>    | chr7  | Body    | 0.93 | (0.67; 1.29) | 6.5E-01 |
| cg02568557 | <i>BARX2</i>     | chr11 | Body    | 0.92 | (0.63; 1.33) | 6.5E-01 |
| cg01891959 | <i>CDH13</i>     | chr16 | ExonBnd | 0.94 | (0.7; 1.25)  | 6.5E-01 |
| cg01891959 | <i>CDH13</i>     | chr16 | Body    | 0.94 | (0.7; 1.25)  | 6.5E-01 |
| cg15279186 | <i>ATF7</i>      | chr12 | Body    | 0.9  | (0.58; 1.41) | 6.5E-01 |
| cg15057554 | <i>PTPRN2</i>    | chr7  | Body    | 1.07 | (0.8; 1.42)  | 6.5E-01 |
| cg00618054 | <i>HMGB4</i>     | chr1  | TSS200  | 0.93 | (0.68; 1.28) | 6.5E-01 |
| cg00618054 | <i>HMGB4</i>     | chr1  | 5'UTR   | 0.93 | (0.68; 1.28) | 6.5E-01 |
| cg00618054 | <i>CSMD2</i>     | chr1  | Body    | 0.93 | (0.68; 1.28) | 6.5E-01 |
| cg16515584 | <i>ZNF704</i>    | chr8  | 5'UTR   | 1.12 | (0.68; 1.84) | 6.5E-01 |
| cg27200869 | <i>PTPRN2</i>    | chr7  | Body    | 0.93 | (0.69; 1.26) | 6.5E-01 |



|            |              |       |         |      |              |         |
|------------|--------------|-------|---------|------|--------------|---------|
| cg07795407 | MEIS2        | chr15 | 5'UTR   | 1.09 | (0.75; 1.57) | 6.5E-01 |
| cg07795407 | MEIS2        | chr15 | 1stExon | 1.09 | (0.75; 1.57) | 6.5E-01 |
| cg07795407 | MEIS2        | chr15 | Body    | 1.09 | (0.75; 1.57) | 6.5E-01 |
| cg07795407 | MEIS2        | chr15 | TSS1500 | 1.09 | (0.75; 1.57) | 6.5E-01 |
| cg02710892 | TENM2        | chr5  | Body    | 0.93 | (0.7; 1.25)  | 6.5E-01 |
| cg06919467 | UBE2E2       | chr3  | Body    | 1.07 | (0.79; 1.46) | 6.5E-01 |
| cg04566019 | TENM2        | chr5  | Body    | 0.89 | (0.55; 1.46) | 6.5E-01 |
| cg13871430 | ELAVL4       | chr1  | Body    | 0.91 | (0.6; 1.38)  | 6.5E-01 |
| cg07374808 | BRUNOL4      | chr18 | Body    | 1.13 | (0.66; 1.93) | 6.5E-01 |
| cg12967327 | RTN4RL1      | chr17 | Body    | 1.09 | (0.75; 1.58) | 6.5E-01 |
| cg06740893 | TNFRSF1B     | chr1  | Body    | 1.09 | (0.76; 1.56) | 6.5E-01 |
| cg03308120 | PTPRN2       | chr7  | Body    | 1.08 | (0.77; 1.53) | 6.5E-01 |
| cg14491224 | PHACTR1      | chr6  | Body    | 0.93 | (0.67; 1.29) | 6.5E-01 |
| cg21850830 | FBXO32       | chr8  | TSS200  | 0.93 | (0.69; 1.26) | 6.5E-01 |
| cg15633128 | SLC16A9      | chr10 | TSS1500 | 1.09 | (0.74; 1.6)  | 6.5E-01 |
| cg06438489 | AKAP13       | chr15 | Body    | 0.91 | (0.6; 1.38)  | 6.5E-01 |
| cg00937966 | CUX2         | chr12 | Body    | 0.92 | (0.64; 1.32) | 6.5E-01 |
| cg09922087 | TENM2        | chr5  | Body    | 1.08 | (0.77; 1.52) | 6.5E-01 |
| cg12054171 | PTPRN2       | chr7  | Body    | 0.92 | (0.63; 1.33) | 6.5E-01 |
| cg27473215 | POU2F1       | chr1  | Body    | 1.1  | (0.73; 1.64) | 6.5E-01 |
| cg27473215 | POU2F1       | chr1  | TSS1500 | 1.1  | (0.73; 1.64) | 6.5E-01 |
| cg06741536 | RAP1B        | chr12 | 5'UTR   | 1.08 | (0.76; 1.53) | 6.5E-01 |
| cg08580308 | FBXO36       | chr2  | Body    | 0.93 | (0.66; 1.3)  | 6.5E-01 |
| cg03823381 | PHACTR1      | chr6  | Body    | 1.08 | (0.77; 1.53) | 6.5E-01 |
| cg09269891 | CREBBP       | chr16 | Body    | 0.92 | (0.65; 1.31) | 6.5E-01 |
| cg13442839 | WWOX         | chr16 | Body    | 0.93 | (0.67; 1.29) | 6.5E-01 |
| cg25023596 | TAOK3        | chr12 | Body    | 1.08 | (0.78; 1.49) | 6.5E-01 |
| cg15897624 | CUX2         | chr12 | Body    | 0.93 | (0.66; 1.29) | 6.5E-01 |
| cg08407315 | SUSD4        | chr1  | Body    | 0.91 | (0.62; 1.35) | 6.5E-01 |
| cg04950301 | PHACTR1      | chr6  | Body    | 0.88 | (0.5; 1.55)  | 6.5E-01 |
| cg04031279 | AKAP13       | chr15 | Body    | 0.93 | (0.66; 1.3)  | 6.6E-01 |
| cg12622854 | AKAP13       | chr15 | Body    | 0.92 | (0.66; 1.3)  | 6.6E-01 |
| cg13484596 | ZBTB20       | chr3  | 5'UTR   | 1.18 | (0.57; 2.46) | 6.6E-01 |
| cg14477514 | BRUNOL4      | chr18 | Body    | 1.13 | (0.66; 1.92) | 6.6E-01 |
| cg07810083 | TNRC18       | chr7  | 5'UTR   | 1.08 | (0.78; 1.49) | 6.6E-01 |
| cg04218418 | DDHD2        | chr8  | TSS1500 | 1.07 | (0.79; 1.44) | 6.6E-01 |
| cg04218418 | DDHD2        | chr8  | TSS200  | 1.07 | (0.79; 1.44) | 6.6E-01 |
| cg21322436 | CNTNAP2      | chr7  | TSS1500 | 1.09 | (0.75; 1.59) | 6.6E-01 |
| cg10827859 | ALCAM        | chr3  | Body    | 1.08 | (0.77; 1.51) | 6.6E-01 |
| cg19209943 | LOC101929698 | chr20 | Body    | 0.92 | (0.63; 1.33) | 6.6E-01 |
| cg19209943 | NOL4L        | chr20 | Body    | 0.92 | (0.63; 1.33) | 6.6E-01 |
| cg25307097 | TAOK3        | chr12 | 5'UTR   | 0.86 | (0.45; 1.66) | 6.6E-01 |
| cg17608931 | RTN4RL1      | chr17 | Body    | 1.08 | (0.78; 1.49) | 6.6E-01 |
| cg12686133 | NDUFA9       | chr12 | Body    | 1.08 | (0.77; 1.5)  | 6.6E-01 |
| cg11027649 | PTPRN2       | chr7  | Body    | 0.93 | (0.67; 1.29) | 6.6E-01 |
| cg15134685 | NRXN1        | chr2  | 5'UTR   | 0.9  | (0.56; 1.44) | 6.6E-01 |
| cg15134685 | NRXN1        | chr2  | 1stExon | 0.9  | (0.56; 1.44) | 6.6E-01 |
| cg15134685 | NRXN1        | chr2  | Body    | 0.9  | (0.56; 1.44) | 6.6E-01 |
| cg20538951 | TNRC18       | chr7  | Body    | 0.93 | (0.67; 1.29) | 6.6E-01 |
| cg04500377 | DDHD2        | chr8  | 5'UTR   | 0.91 | (0.61; 1.36) | 6.6E-01 |
| cg02468355 | CCDC80       | chr3  | Body    | 0.92 | (0.62; 1.35) | 6.6E-01 |
| cg16602504 | FBXO11       | chr2  | TSS200  | 0.93 | (0.68; 1.28) | 6.6E-01 |
| cg13370485 | CACNA1C      | chr12 | Body    | 0.92 | (0.65; 1.31) | 6.6E-01 |
| cg12613368 | CNTF         | chr11 | TSS1500 | 0.92 | (0.65; 1.31) | 6.6E-01 |
| cg24983959 | RTN4RL2      | chr11 | Body    | 0.93 | (0.68; 1.28) | 6.6E-01 |
| cg18897041 | FBXO32       | chr8  | TSS1500 | 0.94 | (0.7; 1.25)  | 6.6E-01 |
| cg06471194 | CHD6         | chr20 | 5'UTR   | 0.93 | (0.67; 1.29) | 6.6E-01 |
| cg08139688 | FBXO34       | chr14 | 5'UTR   | 1.09 | (0.75; 1.58) | 6.6E-01 |
| cg19275556 | SLC16A9      | chr10 | TSS1500 | 0.92 | (0.63; 1.34) | 6.6E-01 |
| cg27001250 | PTPRS        | chr19 | Body    | 0.9  | (0.57; 1.42) | 6.6E-01 |
| cg19363471 | PTPRN2       | chr7  | Body    | 0.93 | (0.69; 1.27) | 6.6E-01 |



|              |                |       |         |      |              |         |
|--------------|----------------|-------|---------|------|--------------|---------|
| ch.1.893309F | <i>ARID1A</i>  | chr1  | Body    | 1.08 | (0.76; 1.56) | 6.6E-01 |
| cg19313015   | <i>CHFR</i>    | chr12 | TSS200  | 1.07 | (0.78; 1.47) | 6.6E-01 |
| cg03631415   | <i>ATF7</i>    | chr12 | 5'UTR   | 1.09 | (0.75; 1.59) | 6.6E-01 |
| cg03631415   | <i>ATF7</i>    | chr12 | Body    | 1.09 | (0.75; 1.59) | 6.6E-01 |
| cg15223713   | <i>PTPRN2</i>  | chr7  | Body    | 0.93 | (0.66; 1.31) | 6.6E-01 |
| cg17199010   | <i>TNRC18</i>  | chr7  | Body    | 1.07 | (0.78; 1.47) | 6.6E-01 |
| cg10956480   | <i>CACNA1C</i> | chr12 | Body    | 0.93 | (0.69; 1.26) | 6.6E-01 |
| cg16893140   | <i>EIF2S1</i>  | chr14 | Body    | 1.1  | (0.71; 1.71) | 6.6E-01 |
| cg13215762   | <i>PTPRN2</i>  | chr7  | Body    | 0.93 | (0.68; 1.28) | 6.6E-01 |
| cg10523411   | <i>PTPRN2</i>  | chr7  | Body    | 1.08 | (0.76; 1.55) | 6.6E-01 |
| cg01211338   | <i>MEIS2</i>   | chr15 | Body    | 0.92 | (0.64; 1.32) | 6.6E-01 |
| cg26180501   | <i>PTPRN2</i>  | chr7  | Body    | 1.07 | (0.78; 1.48) | 6.6E-01 |
| cg25013316   | <i>TNR</i>     | chr1  | 5'UTR   | 0.93 | (0.66; 1.3)  | 6.6E-01 |
| cg26772766   | <i>RTN4RL1</i> | chr17 | TSS200  | 1.08 | (0.77; 1.5)  | 6.6E-01 |
| cg02243535   | <i>RTN4RL1</i> | chr17 | Body    | 0.91 | (0.6; 1.38)  | 6.6E-01 |
| cg26814569   | <i>CUX2</i>    | chr12 | Body    | 1.09 | (0.74; 1.62) | 6.6E-01 |
| cg22839394   | <i>SUGCT</i>   | chr7  | Body    | 0.9  | (0.58; 1.42) | 6.6E-01 |
| cg07166885   | <i>AKAP3</i>   | chr12 | 5'UTR   | 1.12 | (0.67; 1.88) | 6.6E-01 |
| cg14072126   | <i>FBXO11</i>  | chr2  | 5'UTR   | 1.11 | (0.7; 1.74)  | 6.6E-01 |
| cg27122614   | <i>PTPRN2</i>  | chr7  | Body    | 0.92 | (0.62; 1.35) | 6.6E-01 |
| cg00278211   | <i>CACNA1C</i> | chr12 | Body    | 0.92 | (0.64; 1.33) | 6.6E-01 |
| cg26320504   | <i>PTPRN2</i>  | chr7  | Body    | 0.94 | (0.71; 1.24) | 6.6E-01 |
| cg23049823   | <i>MTNR1B</i>  | chr11 | 3'UTR   | 1.11 | (0.7; 1.75)  | 6.6E-01 |
| cg02293852   | <i>PTPRU</i>   | chr1  | Body    | 1.11 | (0.69; 1.79) | 6.6E-01 |
| cg26740249   | <i>TNRC6C</i>  | chr17 | 5'UTR   | 1.07 | (0.78; 1.48) | 6.6E-01 |
| cg19241327   | <i>PTPRN2</i>  | chr7  | Body    | 0.94 | (0.69; 1.26) | 6.6E-01 |
| cg13912824   | <i>PTPRN2</i>  | chr7  | Body    | 1.07 | (0.78; 1.47) | 6.6E-01 |
| cg20291033   | <i>TNR</i>     | chr1  | TSS200  | 1.08 | (0.77; 1.51) | 6.6E-01 |
| cg03565153   | <i>PHACTR1</i> | chr6  | Body    | 0.92 | (0.63; 1.34) | 6.6E-01 |
| cg03416645   | <i>ALCAM</i>   | chr3  | Body    | 1.08 | (0.76; 1.55) | 6.6E-01 |
| cg07482256   | <i>TNR</i>     | chr1  | 5'UTR   | 1.07 | (0.79; 1.46) | 6.6E-01 |
| cg05977462   | <i>CUX2</i>    | chr12 | Body    | 0.93 | (0.68; 1.28) | 6.6E-01 |
| cg23963419   | <i>RECQL5</i>  | chr17 | 3'UTR   | 0.93 | (0.68; 1.28) | 6.6E-01 |
| cg23963419   | <i>RECQL5</i>  | chr17 | Body    | 0.93 | (0.68; 1.28) | 6.6E-01 |
| cg08970226   | <i>TSHZ3</i>   | chr19 | TSS1500 | 1.11 | (0.69; 1.8)  | 6.6E-01 |
| cg23385492   | <i>PTPRN2</i>  | chr7  | Body    | 1.08 | (0.76; 1.54) | 6.6E-01 |
| cg13276165   | <i>NRXN1</i>   | chr2  | 5'UTR   | 0.87 | (0.47; 1.61) | 6.7E-01 |
| cg18101414   | <i>CUX2</i>    | chr12 | Body    | 1.09 | (0.73; 1.64) | 6.7E-01 |
| cg22284828   | <i>PTPRU</i>   | chr1  | TSS1500 | 0.92 | (0.64; 1.33) | 6.7E-01 |
| cg07033880   | <i>AKAP13</i>  | chr15 | TSS200  | 1.08 | (0.76; 1.53) | 6.7E-01 |
| cg14628604   | <i>PTPRN2</i>  | chr7  | Body    | 1.08 | (0.75; 1.57) | 6.7E-01 |
| cg06400119   | <i>PTPRN2</i>  | chr7  | Body    | 0.94 | (0.7; 1.26)  | 6.7E-01 |
| cg20983178   | <i>TENM2</i>   | chr5  | Body    | 1.07 | (0.78; 1.49) | 6.7E-01 |
| cg06338523   | <i>PTPRN2</i>  | chr7  | Body    | 0.93 | (0.67; 1.3)  | 6.7E-01 |
| cg20205227   | <i>BRUNOL4</i> | chr18 | Body    | 0.92 | (0.64; 1.33) | 6.7E-01 |
| cg19576843   | <i>CTNND2</i>  | chr5  | Body    | 0.93 | (0.67; 1.29) | 6.7E-01 |
| cg23509665   | <i>PTPRN2</i>  | chr7  | Body    | 1.08 | (0.77; 1.51) | 6.7E-01 |
| cg26637901   | <i>ATF7IP</i>  | chr12 | TSS200  | 0.92 | (0.63; 1.35) | 6.7E-01 |
| cg21860926   | <i>RTN4RL1</i> | chr17 | Body    | 1.08 | (0.76; 1.55) | 6.7E-01 |
| cg10537277   | <i>PDE8A</i>   | chr15 | Body    | 1.08 | (0.76; 1.54) | 6.7E-01 |
| cg04518972   | <i>UBE2E2</i>  | chr3  | 5'UTR   | 0.94 | (0.69; 1.27) | 6.7E-01 |
| cg04992250   | <i>PTPRN2</i>  | chr7  | Body    | 1.07 | (0.8; 1.43)  | 6.7E-01 |
| cg05046371   | <i>GNA12</i>   | chr7  | 3'UTR   | 1.07 | (0.79; 1.44) | 6.7E-01 |
| cg05611722   | <i>FBXO32</i>  | chr8  | 5'UTR   | 0.91 | (0.6; 1.39)  | 6.7E-01 |
| cg05611722   | <i>FBXO32</i>  | chr8  | Body    | 0.91 | (0.6; 1.39)  | 6.7E-01 |
| cg05914935   | <i>ATF7IP2</i> | chr16 | TSS1500 | 1.07 | (0.78; 1.47) | 6.7E-01 |
| cg09496385   | <i>PTPRN2</i>  | chr7  | Body    | 0.93 | (0.65; 1.32) | 6.7E-01 |
| cg08739399   | <i>CACNA1C</i> | chr12 | Body    | 1.07 | (0.77; 1.49) | 6.7E-01 |
| cg27182133   | <i>PEX14</i>   | chr1  | Body    | 0.93 | (0.68; 1.27) | 6.7E-01 |
| cg17633611   | <i>COL5A2</i>  | chr2  | Body    | 0.92 | (0.63; 1.34) | 6.7E-01 |
| cg11018271   | <i>GNA12</i>   | chr7  | Body    | 1.07 | (0.78; 1.48) | 6.7E-01 |



|            |                |       |         |      |              |         |
|------------|----------------|-------|---------|------|--------------|---------|
| cg05495351 | <i>NRXN1</i>   | chr2  | TSS200  | 0.92 | (0.65; 1.32) | 6.7E-01 |
| cg09838115 | <i>PTPRN2</i>  | chr7  | TSS1500 | 1.08 | (0.76; 1.54) | 6.7E-01 |
| cg09838115 | <i>PTPRN2</i>  | chr7  | Body    | 1.08 | (0.76; 1.54) | 6.7E-01 |
| cg06612088 | <i>CTNND2</i>  | chr5  | Body    | 0.94 | (0.69; 1.26) | 6.7E-01 |
| cg12259070 | <i>CSMD2</i>   | chr1  | Body    | 0.9  | (0.55; 1.47) | 6.7E-01 |
| cg15803803 | <i>AKAP13</i>  | chr15 | 3'UTR   | 1.13 | (0.64; 2.01) | 6.7E-01 |
| cg06258347 | <i>CCDC80</i>  | chr3  | Body    | 1.11 | (0.69; 1.79) | 6.7E-01 |
| cg23348430 | <i>NRXN1</i>   | chr2  | Body    | 1.07 | (0.78; 1.48) | 6.7E-01 |
| cg21688692 | <i>ATP8A1</i>  | chr4  | Body    | 0.92 | (0.64; 1.33) | 6.7E-01 |
| cg13270853 | <i>CHFR</i>    | chr12 | Body    | 1.07 | (0.78; 1.48) | 6.7E-01 |
| cg27241559 | <i>GNA12</i>   | chr7  | TSS200  | 1.08 | (0.77; 1.51) | 6.7E-01 |
| cg15453257 | <i>AKAP13</i>  | chr15 | 5'UTR   | 0.94 | (0.7; 1.26)  | 6.7E-01 |
| cg18187148 | <i>CSMD2</i>   | chr1  | Body    | 1.08 | (0.77; 1.51) | 6.7E-01 |
| cg13302994 | <i>UNC80</i>   | chr2  | Body    | 1.07 | (0.78; 1.47) | 6.7E-01 |
| cg03731464 | <i>CACNA1C</i> | chr12 | 3'UTR   | 0.94 | (0.71; 1.24) | 6.7E-01 |
| cg12058096 | <i>CUX2</i>    | chr12 | Body    | 1.1  | (0.72; 1.67) | 6.7E-01 |
| cg09805902 | <i>CSMD2</i>   | chr1  | Body    | 1.08 | (0.76; 1.54) | 6.7E-01 |
| cg00935216 | <i>PTPRN2</i>  | chr7  | Body    | 1.08 | (0.76; 1.52) | 6.7E-01 |
| cg14401309 | <i>NOL4</i>    | chr18 | Body    | 0.93 | (0.68; 1.29) | 6.7E-01 |
| cg24752821 | <i>CHCHD6</i>  | chr3  | Body    | 1.09 | (0.75; 1.58) | 6.7E-01 |
| cg22470248 | <i>CDH13</i>   | chr16 | 5'UTR   | 0.94 | (0.7; 1.26)  | 6.7E-01 |
| cg22470248 | <i>CDH13</i>   | chr16 | Body    | 0.94 | (0.7; 1.26)  | 6.7E-01 |
| cg17227361 | <i>TNR</i>     | chr1  | 5'UTR   | 0.94 | (0.71; 1.25) | 6.7E-01 |
| cg04045419 | <i>WAC</i>     | chr10 | Body    | 0.93 | (0.68; 1.28) | 6.7E-01 |
| cg07195011 | <i>CTNND2</i>  | chr5  | TSS200  | 1.08 | (0.76; 1.52) | 6.7E-01 |
| cg06437651 | <i>PTPRN2</i>  | chr7  | Body    | 0.92 | (0.62; 1.36) | 6.7E-01 |
| cg21437042 | <i>DNAI2</i>   | chr17 | Body    | 0.92 | (0.64; 1.34) | 6.7E-01 |
| cg27651480 | <i>PTPRN2</i>  | chr7  | Body    | 1.06 | (0.8; 1.4)   | 6.7E-01 |
| cg00496251 | <i>TNRC6C</i>  | chr17 | 5'UTR   | 1.07 | (0.79; 1.45) | 6.7E-01 |
| cg07746840 | <i>NOL4L</i>   | chr20 | Body    | 0.93 | (0.67; 1.3)  | 6.7E-01 |
| cg19438860 | <i>CTNND2</i>  | chr5  | Body    | 1.07 | (0.78; 1.48) | 6.7E-01 |
| cg20752485 | <i>RNU5E-1</i> | chr5  | Body    | 1.07 | (0.78; 1.46) | 6.7E-01 |
| cg06666340 | <i>CACNA1C</i> | chr12 | Body    | 0.93 | (0.68; 1.28) | 6.7E-01 |
| cg27042719 | <i>NRXN1</i>   | chr2  | 5'UTR   | 1.09 | (0.73; 1.64) | 6.7E-01 |
| cg27042719 | <i>NRXN1</i>   | chr2  | 1stExon | 1.09 | (0.73; 1.64) | 6.7E-01 |
| cg21843225 | <i>CDH13</i>   | chr16 | 5'UTR   | 0.94 | (0.69; 1.27) | 6.7E-01 |
| cg21843225 | <i>CDH13</i>   | chr16 | Body    | 0.94 | (0.69; 1.27) | 6.7E-01 |
| cg20819956 | <i>ZBTB20</i>  | chr3  | Body    | 1.07 | (0.77; 1.49) | 6.7E-01 |
| cg01324883 | <i>UBE2E2</i>  | chr3  | TSS200  | 0.93 | (0.68; 1.29) | 6.7E-01 |
| cg22455501 | <i>ZBTB20</i>  | chr3  | Body    | 0.83 | (0.36; 1.93) | 6.7E-01 |
| cg22455501 | <i>ZBTB20</i>  | chr3  | 5'UTR   | 0.83 | (0.36; 1.93) | 6.7E-01 |
| cg18506400 | <i>SUSD4</i>   | chr1  | Body    | 1.13 | (0.64; 2.02) | 6.7E-01 |
| cg14239494 | <i>CHD6</i>    | chr20 | 5'UTR   | 0.93 | (0.66; 1.3)  | 6.7E-01 |
| cg23217983 | <i>SGIP1</i>   | chr1  | Body    | 0.89 | (0.52; 1.53) | 6.7E-01 |
| cg18142413 | <i>ZBTB20</i>  | chr3  | 5'UTR   | 1.08 | (0.76; 1.52) | 6.7E-01 |
| cg18142413 | <i>ZBTB20</i>  | chr3  | Body    | 1.08 | (0.76; 1.52) | 6.7E-01 |
| cg19428071 | <i>NRXN1</i>   | chr2  | Body    | 0.92 | (0.61; 1.37) | 6.7E-01 |
| cg23202188 | <i>DNAI2</i>   | chr17 | Body    | 1.12 | (0.67; 1.87) | 6.7E-01 |
| cg20379170 | <i>PTPRS</i>   | chr19 | 5'UTR   | 0.94 | (0.69; 1.27) | 6.7E-01 |
| cg08933276 | <i>GNA12</i>   | chr7  | 3'UTR   | 1.07 | (0.77; 1.51) | 6.7E-01 |
| cg12069652 | <i>WWOX</i>    | chr16 | Body    | 0.93 | (0.67; 1.3)  | 6.8E-01 |
| cg26999360 | <i>PTPRN2</i>  | chr7  | Body    | 0.94 | (0.69; 1.27) | 6.8E-01 |
| cg22380090 | <i>SLC16A9</i> | chr10 | Body    | 1.07 | (0.79; 1.45) | 6.8E-01 |
| cg23138603 | <i>CDH13</i>   | chr16 | Body    | 0.94 | (0.7; 1.26)  | 6.8E-01 |
| cg04626603 | <i>POU2F1</i>  | chr1  | Body    | 1.08 | (0.75; 1.55) | 6.8E-01 |
| cg10789161 | <i>RAP1B</i>   | chr12 | 5'UTR   | 1.08 | (0.76; 1.53) | 6.8E-01 |
| cg19840924 | <i>ZNF704</i>  | chr8  | Body    | 0.91 | (0.58; 1.42) | 6.8E-01 |
| cg12496211 | <i>CACNA1C</i> | chr12 | Body    | 1.14 | (0.61; 2.14) | 6.8E-01 |
| cg07028533 | <i>CNTNAP2</i> | chr7  | TSS200  | 1.11 | (0.69; 1.79) | 6.8E-01 |
| cg19428799 | <i>ATP8A1</i>  | chr4  | ExonBnd | 0.93 | (0.66; 1.31) | 6.8E-01 |
| cg19428799 | <i>ATP8A1</i>  | chr4  | Body    | 0.93 | (0.66; 1.31) | 6.8E-01 |



|            |                  |       |         |      |              |         |
|------------|------------------|-------|---------|------|--------------|---------|
| cg13333143 | <i>CTDSP2</i>    | chr12 | Body    | 0.93 | (0.68; 1.28) | 6.8E-01 |
| cg03399048 | <i>PTPRN2</i>    | chr7  | Body    | 1.07 | (0.78; 1.47) | 6.8E-01 |
| cg12775835 | <i>TNRC18</i>    | chr7  | 5'UTR   | 0.92 | (0.64; 1.34) | 6.8E-01 |
| cg14370061 | <i>GNA12</i>     | chr7  | Body    | 0.93 | (0.68; 1.29) | 6.8E-01 |
| cg26898039 | <i>CSMD2</i>     | chr1  | Body    | 1.07 | (0.78; 1.47) | 6.8E-01 |
| cg19431282 | <i>ATF7</i>      | chr12 | Body    | 1.07 | (0.77; 1.5)  | 6.8E-01 |
| cg23784675 | <i>BRUNOL4</i>   | chr18 | Body    | 0.95 | (0.73; 1.23) | 6.8E-01 |
| cg02590940 | <i>DCUN1D4</i>   | chr4  | TSS200  | 0.94 | (0.69; 1.28) | 6.8E-01 |
| cg02590940 | <i>DCUN1D4</i>   | chr4  | TSS1500 | 0.94 | (0.69; 1.28) | 6.8E-01 |
| cg11206667 | <i>FBXO36</i>    | chr2  | TSS1500 | 1.07 | (0.77; 1.5)  | 6.8E-01 |
| cg25576789 | <i>PTPRN2</i>    | chr7  | Body    | 1.06 | (0.79; 1.43) | 6.8E-01 |
| cg09720642 | <i>WVOX</i>      | chr16 | Body    | 1.11 | (0.67; 1.85) | 6.8E-01 |
| cg06815950 | <i>CUX2</i>      | chr12 | Body    | 0.9  | (0.55; 1.48) | 6.8E-01 |
| cg02860232 | <i>PTPRS</i>     | chr19 | 5'UTR   | 1.07 | (0.77; 1.49) | 6.8E-01 |
| cg26416887 | <i>CUX2</i>      | chr12 | Body    | 1.12 | (0.65; 1.96) | 6.8E-01 |
| cg09437479 | <i>WVOX</i>      | chr16 | Body    | 0.94 | (0.69; 1.27) | 6.8E-01 |
| cg15504666 | <i>ERI3</i>      | chr1  | Body    | 0.94 | (0.69; 1.27) | 6.8E-01 |
| cg10758260 | <i>TNFRSF19</i>  | chr13 | Body    | 1.07 | (0.79; 1.44) | 6.8E-01 |
| cg13647052 | <i>CACNA1C</i>   | chr12 | 3'UTR   | 1.07 | (0.78; 1.48) | 6.8E-01 |
| cg11356247 | <i>PTPRN2</i>    | chr7  | Body    | 0.94 | (0.68; 1.28) | 6.8E-01 |
| cg11111139 | <i>PTPRN2</i>    | chr7  | Body    | 1.1  | (0.7; 1.74)  | 6.8E-01 |
| cg08791395 | <i>PTPRN2</i>    | chr7  | Body    | 1.07 | (0.77; 1.48) | 6.8E-01 |
| cg07092029 | <i>CDH13</i>     | chr16 | Body    | 0.94 | (0.71; 1.25) | 6.8E-01 |
| cg21577836 | <i>TNR</i>       | chr1  | 5'UTR   | 0.93 | (0.64; 1.34) | 6.8E-01 |
| cg04879722 | <i>ZBTB20</i>    | chr3  | 5'UTR   | 1.08 | (0.76; 1.53) | 6.8E-01 |
| cg01401641 | <i>TSHZ3</i>     | chr19 | Body    | 0.92 | (0.62; 1.36) | 6.8E-01 |
| cg04234813 | <i>CUX2</i>      | chr12 | Body    | 0.91 | (0.59; 1.4)  | 6.8E-01 |
| cg26463800 | <i>DNAI2</i>     | chr17 | Body    | 0.92 | (0.63; 1.36) | 6.8E-01 |
| cg13822242 | <i>PTPRN2</i>    | chr7  | Body    | 1.07 | (0.78; 1.45) | 6.8E-01 |
| cg12453033 | <i>FBXO36</i>    | chr2  | Body    | 1.06 | (0.8; 1.4)   | 6.8E-01 |
| cg15208375 | <i>TSHZ3</i>     | chr19 | TSS1500 | 1.08 | (0.74; 1.58) | 6.8E-01 |
| cg17574857 | <i>FBXO38</i>    | chr5  | TSS200  | 1.07 | (0.77; 1.51) | 6.8E-01 |
| cg11589771 | <i>RNU5E-1</i>   | chr5  | Body    | 0.92 | (0.63; 1.35) | 6.8E-01 |
| cg22504024 | <i>CUX2</i>      | chr12 | Body    | 0.94 | (0.69; 1.28) | 6.8E-01 |
| cg16307325 | <i>CACNA1C</i>   | chr12 | Body    | 0.94 | (0.69; 1.28) | 6.8E-01 |
| cg02694994 | <i>PTPRN2</i>    | chr7  | Body    | 1.08 | (0.75; 1.54) | 6.8E-01 |
| cg08250528 | <i>ATF7</i>      | chr12 | TSS1500 | 1.07 | (0.77; 1.5)  | 6.8E-01 |
| cg00250414 | <i>PTPRN2</i>    | chr7  | Body    | 1.08 | (0.74; 1.58) | 6.8E-01 |
| cg03696369 | <i>SRSF10</i>    | chr1  | TSS200  | 0.94 | (0.7; 1.27)  | 6.8E-01 |
| cg01383997 | <i>CHCHD6</i>    | chr3  | Body    | 0.92 | (0.63; 1.35) | 6.8E-01 |
| cg03098704 | <i>RTN4RL1</i>   | chr17 | Body    | 0.92 | (0.64; 1.34) | 6.8E-01 |
| cg16638558 | <i>FBXO31</i>    | chr16 | Body    | 0.93 | (0.67; 1.3)  | 6.8E-01 |
| cg00526275 | <i>TAOK3</i>     | chr12 | TSS1500 | 0.92 | (0.64; 1.34) | 6.8E-01 |
| cg17746562 | <i>ELAVL4</i>    | chr1  | Body    | 0.93 | (0.66; 1.31) | 6.8E-01 |
| cg16430909 | <i>SLC16A9</i>   | chr10 | TSS200  | 0.93 | (0.68; 1.29) | 6.8E-01 |
| cg11415369 | <i>TNRC18</i>    | chr7  | Body    | 0.92 | (0.62; 1.37) | 6.8E-01 |
| cg04254468 | <i>PEX14</i>     | chr1  | Body    | 1.09 | (0.72; 1.64) | 6.8E-01 |
| cg25278175 | <i>NRXN1</i>     | chr2  | Body    | 1.06 | (0.8; 1.41)  | 6.8E-01 |
| cg04554506 | <i>MEIS2</i>     | chr15 | Body    | 1.08 | (0.75; 1.55) | 6.8E-01 |
| cg11306119 | <i>PTPRS</i>     | chr19 | Body    | 1.08 | (0.74; 1.58) | 6.8E-01 |
| cg08828886 | <i>CHFR</i>      | chr12 | Body    | 0.94 | (0.69; 1.28) | 6.8E-01 |
| cg05829749 | <i>FBXO31</i>    | chr16 | Body    | 1.07 | (0.78; 1.47) | 6.8E-01 |
| cg26006910 | <i>MTNR1A</i>    | chr4  | Body    | 0.93 | (0.67; 1.3)  | 6.8E-01 |
| cg00453903 | <i>TNFRSF11B</i> | chr8  | 3'UTR   | 1.09 | (0.72; 1.65) | 6.8E-01 |
| cg07269364 | <i>PTPRN2</i>    | chr7  | Body    | 1.07 | (0.78; 1.48) | 6.8E-01 |
| cg12784167 | <i>PTPRN2</i>    | chr7  | Body    | 1.06 | (0.8; 1.41)  | 6.8E-01 |
| cg25973835 | <i>ZBTB20</i>    | chr3  | Body    | 0.89 | (0.53; 1.52) | 6.8E-01 |
| cg25973835 | <i>ZBTB20</i>    | chr3  | 5'UTR   | 0.89 | (0.53; 1.52) | 6.8E-01 |
| cg12919119 | <i>CTDSPL</i>    | chr3  | Body    | 0.85 | (0.39; 1.84) | 6.8E-01 |
| cg03224285 | <i>RTN4RL1</i>   | chr17 | Body    | 0.92 | (0.62; 1.36) | 6.8E-01 |
| cg24563907 | <i>CHCHD6</i>    | chr3  | Body    | 1.08 | (0.75; 1.55) | 6.8E-01 |



|            |              |       |         |      |              |         |
|------------|--------------|-------|---------|------|--------------|---------|
| cg22301272 | CHFR         | chr12 | Body    | 1.08 | (0.75; 1.54) | 6.8E-01 |
| cg02250680 | ZFP91        | chr11 | TSS200  | 0.93 | (0.67; 1.3)  | 6.8E-01 |
| cg15896717 | WVOX         | chr16 | Body    | 0.92 | (0.61; 1.38) | 6.8E-01 |
| cg24841685 | NRXN1        | chr2  | Body    | 0.92 | (0.64; 1.35) | 6.8E-01 |
| cg03530940 | CACNA1C      | chr12 | Body    | 0.92 | (0.63; 1.35) | 6.8E-01 |
| cg13628971 | GNA12        | chr7  | TSS1500 | 1.07 | (0.76; 1.51) | 6.8E-01 |
| cg03796321 | AKAP13       | chr15 | Body    | 1.07 | (0.77; 1.48) | 6.8E-01 |
| cg09042009 | PTPRN2       | chr7  | Body    | 1.08 | (0.75; 1.54) | 6.8E-01 |
| cg04564233 | PTPRN2       | chr7  | Body    | 1.08 | (0.76; 1.53) | 6.8E-01 |
| cg25012186 | TNRC6A       | chr16 | Body    | 0.93 | (0.67; 1.3)  | 6.8E-01 |
| cg09235185 | PTPRN2       | chr7  | Body    | 0.94 | (0.69; 1.28) | 6.8E-01 |
| cg06544239 | GNA12        | chr7  | Body    | 1.07 | (0.76; 1.51) | 6.8E-01 |
| cg10943443 | TNRC6C       | chr17 | Body    | 1.08 | (0.74; 1.57) | 6.8E-01 |
| cg13784796 | MEIS2        | chr15 | Body    | 1.07 | (0.77; 1.49) | 6.8E-01 |
| cg27441375 | POU2F1       | chr1  | Body    | 0.92 | (0.62; 1.36) | 6.8E-01 |
| cg05666842 | CHCHD6       | chr3  | Body    | 1.07 | (0.78; 1.47) | 6.8E-01 |
| cg04282886 | TDRP         | chr8  | Body    | 1.07 | (0.77; 1.49) | 6.8E-01 |
| cg14053764 | FBXO34       | chr14 | 5'UTR   | 0.89 | (0.51; 1.55) | 6.8E-01 |
| cg01625945 | PTPRN2       | chr7  | Body    | 0.94 | (0.69; 1.28) | 6.8E-01 |
| cg25779426 | SGIP1        | chr1  | Body    | 1.09 | (0.71; 1.67) | 6.8E-01 |
| cg25779426 | SGIP1        | chr1  | ExonBnd | 1.09 | (0.71; 1.67) | 6.8E-01 |
| cg07251887 | LOC100130933 | chr17 | TSS1500 | 0.9  | (0.53; 1.51) | 6.8E-01 |
| cg07251887 | RECQL5       | chr17 | Body    | 0.9  | (0.53; 1.51) | 6.8E-01 |
| cg09283959 | TNR          | chr1  | 5'UTR   | 0.92 | (0.63; 1.36) | 6.8E-01 |
| cg00968541 | CPEB1        | chr15 | Body    | 0.93 | (0.67; 1.3)  | 6.8E-01 |
| cg00968541 | CPEB1        | chr15 | 5'UTR   | 0.93 | (0.67; 1.3)  | 6.8E-01 |
| cg08017787 | PTPRN2       | chr7  | Body    | 1.07 | (0.76; 1.51) | 6.8E-01 |
| cg24258098 | PTPRN2       | chr7  | Body    | 0.94 | (0.68; 1.29) | 6.8E-01 |
| cg04821052 | TNR          | chr1  | Body    | 0.91 | (0.58; 1.43) | 6.8E-01 |
| cg13721404 | NOL4         | chr18 | Body    | 0.91 | (0.59; 1.41) | 6.9E-01 |
| cg24723129 | FSTL1        | chr3  | Body    | 0.94 | (0.68; 1.29) | 6.9E-01 |
| cg06437195 | PHACTR1      | chr6  | Body    | 1.08 | (0.73; 1.6)  | 6.9E-01 |
| cg11365983 | PTPRN2       | chr7  | Body    | 1.06 | (0.79; 1.44) | 6.9E-01 |
| cg20195987 | TNFRSF12A    | chr16 | Body    | 0.94 | (0.68; 1.29) | 6.9E-01 |
| cg14081218 | CTNND2       | chr5  | 5'UTR   | 0.92 | (0.62; 1.38) | 6.9E-01 |
| cg14081218 | CTNND2       | chr5  | 1stExon | 0.92 | (0.62; 1.38) | 6.9E-01 |
| cg02260059 | WVOX         | chr16 | Body    | 1.09 | (0.71; 1.67) | 6.9E-01 |
| cg05375813 | PEX14        | chr1  | Body    | 0.92 | (0.62; 1.37) | 6.9E-01 |
| cg19775269 | PTPRS        | chr19 | 5'UTR   | 0.92 | (0.61; 1.39) | 6.9E-01 |
| cg04316898 | CUX2         | chr12 | Body    | 1.13 | (0.63; 2)    | 6.9E-01 |
| cg05557932 | CREBBP       | chr16 | Body    | 0.93 | (0.65; 1.32) | 6.9E-01 |
| cg27366532 | CREBBP       | chr16 | Body    | 1.09 | (0.72; 1.66) | 6.9E-01 |
| cg22261866 | MTNR1A       | chr4  | Body    | 1.08 | (0.74; 1.57) | 6.9E-01 |
| cg21806090 | CACNA1C      | chr12 | Body    | 1.06 | (0.8; 1.41)  | 6.9E-01 |
| cg12271047 | PTPRN2       | chr7  | Body    | 1.06 | (0.79; 1.43) | 6.9E-01 |
| cg05934196 | TNFRSF10B    | chr8  | Body    | 0.93 | (0.67; 1.3)  | 6.9E-01 |
| cg23690033 | MEIS2        | chr15 | TSS200  | 0.93 | (0.66; 1.31) | 6.9E-01 |
| cg23690033 | MEIS2        | chr15 | TSS1500 | 0.93 | (0.66; 1.31) | 6.9E-01 |
| cg11844927 | TNFRSF1B     | chr1  | Body    | 1.09 | (0.71; 1.68) | 6.9E-01 |
| cg09124230 | CSMD2        | chr1  | Body    | 0.92 | (0.63; 1.36) | 6.9E-01 |
| cg12786198 | FBXO34       | chr14 | 5'UTR   | 0.94 | (0.68; 1.3)  | 6.9E-01 |
| cg15107350 | TNRC18       | chr7  | Body    | 1.07 | (0.76; 1.53) | 6.9E-01 |
| cg24954977 | PDE8A        | chr15 | Body    | 0.94 | (0.68; 1.28) | 6.9E-01 |
| cg04622731 | PTPRN2       | chr7  | Body    | 1.07 | (0.77; 1.48) | 6.9E-01 |
| cg02855778 | PTPRN2       | chr7  | Body    | 0.92 | (0.63; 1.36) | 6.9E-01 |
| cg01785566 | WVOX         | chr16 | Body    | 1.08 | (0.74; 1.57) | 6.9E-01 |
| cg10952591 | EIF2S1       | chr14 | 5'UTR   | 0.94 | (0.67; 1.3)  | 6.9E-01 |
| cg04914625 | PHACTR1      | chr6  | Body    | 0.93 | (0.64; 1.34) | 6.9E-01 |
| cg02540427 | CTDSP2       | chr12 | Body    | 0.93 | (0.67; 1.3)  | 6.9E-01 |
| cg02441015 | PTPRS        | chr19 | Body    | 1.08 | (0.75; 1.56) | 6.9E-01 |
| cg18725000 | POU2F1       | chr1  | 3'UTR   | 1.07 | (0.76; 1.51) | 6.9E-01 |



|            |                     |       |         |      |              |         |
|------------|---------------------|-------|---------|------|--------------|---------|
| cg18725000 | <i>POU2F1</i>       | chr1  | Body    | 1.07 | (0.76; 1.51) | 6.9E-01 |
| cg04882424 | <i>FBXO31</i>       | chr16 | Body    | 1.07 | (0.77; 1.48) | 6.9E-01 |
| cg08381776 | <i>PTPRN2</i>       | chr7  | Body    | 1.07 | (0.76; 1.51) | 6.9E-01 |
| cg06373764 | <i>SLC16A9</i>      | chr10 | TSS200  | 0.94 | (0.71; 1.25) | 6.9E-01 |
| cg12108651 | <i>PTPRN2</i>       | chr7  | Body    | 0.94 | (0.69; 1.28) | 6.9E-01 |
| cg05416758 | <i>PTPRN2</i>       | chr7  | Body    | 1.07 | (0.75; 1.53) | 6.9E-01 |
| cg18395809 | <i>PTPRN2</i>       | chr7  | Body    | 0.93 | (0.66; 1.32) | 6.9E-01 |
| cg12903574 | <i>MEIS2</i>        | chr15 | Body    | 0.92 | (0.62; 1.37) | 6.9E-01 |
| cg16652937 | <i>UBE2E2</i>       | chr3  | TSS1500 | 0.93 | (0.65; 1.32) | 6.9E-01 |
| cg09198517 | <i>CTNND2</i>       | chr5  | Body    | 0.93 | (0.65; 1.33) | 6.9E-01 |
| cg22016357 | <i>ZBTB20</i>       | chr3  | Body    | 1.06 | (0.78; 1.45) | 6.9E-01 |
| cg22016357 | <i>ZBTB20</i>       | chr3  | 3'UTR   | 1.06 | (0.78; 1.45) | 6.9E-01 |
| cg27269279 | <i>BARX2</i>        | chr11 | Body    | 1.1  | (0.7; 1.71)  | 6.9E-01 |
| cg16593030 | <i>TNFRSF10B</i>    | chr8  | Body    | 1.08 | (0.75; 1.55) | 6.9E-01 |
| cg13896328 | <i>PTPRU</i>        | chr1  | 3'UTR   | 0.94 | (0.68; 1.29) | 6.9E-01 |
| cg06889607 | <i>EIF2S1</i>       | chr14 | TSS1500 | 1.14 | (0.6; 2.17)  | 6.9E-01 |
| cg12758060 | <i>CTNND2</i>       | chr5  | Body    | 0.92 | (0.59; 1.42) | 6.9E-01 |
| cg12758060 | <i>CTNND2</i>       | chr5  | 5'UTR   | 0.92 | (0.59; 1.42) | 6.9E-01 |
| cg07602744 | <i>PTPRN2</i>       | chr7  | Body    | 1.07 | (0.77; 1.47) | 6.9E-01 |
| cg07976976 | <i>CDH11</i>        | chr16 | 5'UTR   | 1.06 | (0.78; 1.45) | 6.9E-01 |
| cg23581430 | <i>CREBBP</i>       | chr16 | Body    | 1.08 | (0.75; 1.55) | 6.9E-01 |
| cg06376186 | <i>CNTNAP2</i>      | chr7  | Body    | 0.93 | (0.65; 1.33) | 6.9E-01 |
| cg27532130 | <i>POU2F1</i>       | chr1  | 3'UTR   | 0.93 | (0.66; 1.32) | 6.9E-01 |
| cg25636629 | <i>CDH13</i>        | chr16 | 5'UTR   | 1.12 | (0.64; 1.96) | 6.9E-01 |
| cg25636629 | <i>CDH13</i>        | chr16 | Body    | 1.12 | (0.64; 1.96) | 6.9E-01 |
| cg18409730 | <i>BRUNOL4</i>      | chr18 | TSS1500 | 1.07 | (0.78; 1.46) | 6.9E-01 |
| cg20224341 | <i>ALCAM</i>        | chr3  | Body    | 0.93 | (0.67; 1.31) | 6.9E-01 |
| cg26805263 | <i>TNFRSF19</i>     | chr13 | Body    | 1.06 | (0.78; 1.45) | 6.9E-01 |
| cg03641797 | <i>TNRC18</i>       | chr7  | Body    | 1.08 | (0.74; 1.57) | 6.9E-01 |
| cg03214325 | <i>RTN4RL1</i>      | chr17 | Body    | 1.09 | (0.71; 1.68) | 6.9E-01 |
| cg15733309 | <i>PTPRN2</i>       | chr7  | Body    | 0.94 | (0.67; 1.3)  | 6.9E-01 |
| cg01260909 | <i>CACNA1C-IT2</i>  | chr12 | TSS1500 | 0.92 | (0.62; 1.37) | 6.9E-01 |
| cg23442151 | <i>CSMD2</i>        | chr1  | 1stExon | 0.94 | (0.7; 1.27)  | 6.9E-01 |
| cg06554120 | <i>CTNND2</i>       | chr5  | Body    | 0.92 | (0.61; 1.39) | 6.9E-01 |
| cg20468476 | <i>PTPRS</i>        | chr19 | Body    | 1.07 | (0.77; 1.49) | 6.9E-01 |
| cg11022060 | <i>CPEB1</i>        | chr15 | Body    | 1.14 | (0.6; 2.18)  | 6.9E-01 |
| cg09939591 | <i>CACNA1C</i>      | chr12 | Body    | 0.88 | (0.48; 1.64) | 6.9E-01 |
| cg17901106 | <i>CACNA1C</i>      | chr12 | TSS200  | 1.11 | (0.66; 1.86) | 6.9E-01 |
| cg09068718 | <i>CACNA1C</i>      | chr12 | Body    | 0.9  | (0.54; 1.51) | 6.9E-01 |
| cg07171237 | <i>CHFR</i>         | chr12 | Body    | 1.07 | (0.76; 1.5)  | 6.9E-01 |
| cg11887629 | <i>PTPRS</i>        | chr19 | Body    | 1.08 | (0.73; 1.61) | 6.9E-01 |
| cg27596096 | <i>CDH13</i>        | chr16 | Body    | 1.07 | (0.75; 1.54) | 6.9E-01 |
| cg27596096 | <i>LOC101928417</i> | chr16 | TSS1500 | 1.07 | (0.75; 1.54) | 6.9E-01 |
| cg27596096 | <i>CDH13</i>        | chr16 | 5'UTR   | 1.07 | (0.75; 1.54) | 6.9E-01 |
| cg03621156 | <i>FBXO11</i>       | chr2  | TSS1500 | 0.93 | (0.66; 1.31) | 6.9E-01 |
| cg03621156 | <i>FBXO11</i>       | chr2  | Body    | 0.93 | (0.66; 1.31) | 6.9E-01 |
| cg10989818 | <i>WWOX</i>         | chr16 | Body    | 0.93 | (0.66; 1.32) | 6.9E-01 |
| cg24105728 | <i>PHACTR1</i>      | chr6  | Body    | 0.92 | (0.6; 1.41)  | 6.9E-01 |
| cg08260861 | <i>CNTNAP2</i>      | chr7  | Body    | 0.92 | (0.63; 1.37) | 6.9E-01 |
| cg00949479 | <i>SGIP1</i>        | chr1  | Body    | 0.94 | (0.68; 1.29) | 6.9E-01 |
| cg14581294 | <i>FBXO36</i>       | chr2  | TSS1500 | 1.06 | (0.78; 1.45) | 6.9E-01 |
| cg06955214 | <i>PTPRN2</i>       | chr7  | Body    | 0.93 | (0.64; 1.34) | 6.9E-01 |
| cg00616441 | <i>ZBTB20</i>       | chr3  | Body    | 1.12 | (0.65; 1.93) | 6.9E-01 |
| cg00616441 | <i>ZBTB20</i>       | chr3  | 5'UTR   | 1.12 | (0.65; 1.93) | 6.9E-01 |
| cg13089335 | <i>POU2F1</i>       | chr1  | 5'UTR   | 0.9  | (0.52; 1.55) | 6.9E-01 |
| cg16429476 | <i>TNFRSF1A</i>     | chr12 | Body    | 0.93 | (0.66; 1.32) | 6.9E-01 |
| cg16525045 | <i>CHD6</i>         | chr20 | 5'UTR   | 0.94 | (0.67; 1.3)  | 6.9E-01 |
| cg13245883 | <i>ELAVL4</i>       | chr1  | Body    | 1.08 | (0.73; 1.59) | 7.0E-01 |
| cg15055782 | <i>BARX2</i>        | chr11 | Body    | 0.93 | (0.66; 1.32) | 7.0E-01 |
| cg02306654 | <i>PTPRN2</i>       | chr7  | Body    | 1.07 | (0.76; 1.5)  | 7.0E-01 |
| cg03462556 | <i>SLC16A9</i>      | chr10 | 5'UTR   | 1.07 | (0.77; 1.49) | 7.0E-01 |



|            |              |       |         |      |              |         |
|------------|--------------|-------|---------|------|--------------|---------|
| cg09844992 | ALCAM        | chr3  | Body    | 0.92 | (0.59; 1.42) | 7.0E-01 |
| cg12256469 | PTPRN2       | chr7  | Body    | 0.93 | (0.65; 1.33) | 7.0E-01 |
| cg09218348 | RTN4RL1      | chr17 | Body    | 1.12 | (0.64; 1.95) | 7.0E-01 |
| cg23053506 | PTPRN2       | chr7  | Body    | 0.94 | (0.69; 1.28) | 7.0E-01 |
| cg14404164 | PTPRN2       | chr7  | Body    | 1.07 | (0.78; 1.46) | 7.0E-01 |
| cg01492538 | GNA12        | chr7  | Body    | 1.18 | (0.52; 2.65) | 7.0E-01 |
| cg05015185 | NRXN1        | chr2  | Body    | 1.07 | (0.76; 1.5)  | 7.0E-01 |
| cg05015185 | NRXN1        | chr2  | 1stExon | 1.07 | (0.76; 1.5)  | 7.0E-01 |
| cg05015185 | NRXN1        | chr2  | 5'UTR   | 1.07 | (0.76; 1.5)  | 7.0E-01 |
| cg08857677 | PTPRS        | chr19 | TSS1500 | 1.07 | (0.76; 1.51) | 7.0E-01 |
| cg19468528 | LOC100130933 | chr17 | TSS1500 | 0.86 | (0.4; 1.85)  | 7.0E-01 |
| cg19468528 | RECQL5       | chr17 | Body    | 0.86 | (0.4; 1.85)  | 7.0E-01 |
| cg04253465 | PTPRS        | chr19 | Body    | 0.93 | (0.66; 1.32) | 7.0E-01 |
| cg04441333 | PTPRN2       | chr7  | Body    | 1.07 | (0.77; 1.48) | 7.0E-01 |
| cg19308029 | RNU5E-1      | chr5  | Body    | 0.92 | (0.62; 1.37) | 7.0E-01 |
| cg13046957 | CDH13        | chr16 | Body    | 0.94 | (0.67; 1.31) | 7.0E-01 |
| cg14079445 | CUX2         | chr12 | Body    | 0.94 | (0.68; 1.3)  | 7.0E-01 |
| cg23786763 | MTCL1        | chr18 | Body    | 0.93 | (0.67; 1.31) | 7.0E-01 |
| cg03660451 | RECQL5       | chr17 | TSS1500 | 0.94 | (0.69; 1.28) | 7.0E-01 |
| cg25503104 | DMXL2        | chr15 | Body    | 0.92 | (0.6; 1.41)  | 7.0E-01 |
| cg08445469 | ATF7         | chr12 | Body    | 0.88 | (0.48; 1.64) | 7.0E-01 |
| cg18064706 | PTPRN2       | chr7  | Body    | 0.94 | (0.68; 1.29) | 7.0E-01 |
| cg14426421 | ACVR2A       | chr2  | TSS1500 | 0.91 | (0.55; 1.48) | 7.0E-01 |
| cg26229208 | WVOX         | chr16 | TSS1500 | 1.07 | (0.76; 1.52) | 7.0E-01 |
| cg00807464 | CUX2         | chr12 | Body    | 1.11 | (0.65; 1.9)  | 7.0E-01 |
| cg07083023 | NRXN1        | chr2  | Body    | 1.06 | (0.79; 1.41) | 7.0E-01 |
| cg12845678 | TNRC18       | chr7  | Body    | 0.94 | (0.67; 1.31) | 7.0E-01 |
| cg01660591 | TNFRSF1B     | chr1  | Body    | 1.08 | (0.72; 1.62) | 7.0E-01 |
| cg19175725 | PTPRN2       | chr7  | Body    | 1.07 | (0.76; 1.51) | 7.0E-01 |
| cg17026475 | MEIS2        | chr15 | 5'UTR   | 1.06 | (0.78; 1.45) | 7.0E-01 |
| cg17026475 | MEIS2        | chr15 | 1stExon | 1.06 | (0.78; 1.45) | 7.0E-01 |
| cg17026475 | MEIS2        | chr15 | Body    | 1.06 | (0.78; 1.45) | 7.0E-01 |
| cg17026475 | MEIS2        | chr15 | TSS1500 | 1.06 | (0.78; 1.45) | 7.0E-01 |
| cg24798493 | TNRC18       | chr7  | TSS200  | 1.07 | (0.77; 1.49) | 7.0E-01 |
| cg03289443 | FBXO32       | chr8  | Body    | 0.93 | (0.66; 1.33) | 7.0E-01 |
| cg23085929 | SRSF12       | chr6  | TSS1500 | 1.07 | (0.77; 1.48) | 7.0E-01 |
| cg03688938 | TNFRSF19     | chr13 | TSS1500 | 1.08 | (0.73; 1.6)  | 7.0E-01 |
| cg22146493 | CHCHD6       | chr3  | Body    | 1.08 | (0.74; 1.57) | 7.0E-01 |
| cg17614582 | PTPRN2       | chr7  | Body    | 0.94 | (0.68; 1.3)  | 7.0E-01 |
| cg25411327 | PTPRS        | chr19 | Body    | 1.06 | (0.78; 1.45) | 7.0E-01 |
| cg16066439 | TAOK3        | chr12 | Body    | 1.07 | (0.75; 1.52) | 7.0E-01 |
| cg05436825 | PTPRN2       | chr7  | Body    | 0.9  | (0.54; 1.51) | 7.0E-01 |
| cg19316123 | COL5A2       | chr2  | Body    | 0.94 | (0.7; 1.27)  | 7.0E-01 |
| cg00460944 | CHFR         | chr12 | Body    | 1.06 | (0.79; 1.43) | 7.0E-01 |
| cg02493260 | RTN4         | chr2  | Body    | 1.08 | (0.74; 1.57) | 7.0E-01 |
| cg02493260 | RTN4         | chr2  | 5'UTR   | 1.08 | (0.74; 1.57) | 7.0E-01 |
| cg25023275 | BRUNOL4      | chr18 | TSS1500 | 0.94 | (0.68; 1.29) | 7.0E-01 |
| cg22196130 | CHFR         | chr12 | Body    | 1.07 | (0.77; 1.48) | 7.0E-01 |
| cg07306108 | PTPRN2       | chr7  | Body    | 0.95 | (0.72; 1.25) | 7.0E-01 |
| cg18613685 | PTPRS        | chr19 | Body    | 1.13 | (0.61; 2.07) | 7.0E-01 |
| cg21475065 | CNTNAP2      | chr7  | Body    | 0.94 | (0.69; 1.28) | 7.0E-01 |
| cg14773588 | PHACTR1      | chr6  | Body    | 1.08 | (0.74; 1.58) | 7.0E-01 |
| cg03875668 | CACNA1C      | chr12 | Body    | 1.06 | (0.78; 1.46) | 7.0E-01 |
| cg25466245 | SUSD4        | chr1  | Body    | 0.92 | (0.61; 1.4)  | 7.0E-01 |
| cg25813630 | RTN4RL1      | chr17 | Body    | 0.93 | (0.63; 1.37) | 7.0E-01 |
| cg11099300 | SUGCT        | chr7  | Body    | 0.93 | (0.66; 1.32) | 7.0E-01 |
| cg07340881 | RECQL5       | chr17 | Body    | 1.07 | (0.75; 1.53) | 7.0E-01 |
| cg03476864 | PTPRN2       | chr7  | Body    | 1.06 | (0.79; 1.43) | 7.0E-01 |
| cg16085344 | ATP8A1       | chr4  | 3'UTR   | 0.93 | (0.66; 1.32) | 7.0E-01 |
| cg16444117 | CTDSP2       | chr12 | TSS200  | 0.95 | (0.71; 1.25) | 7.0E-01 |
| cg22550233 | CACNA1C      | chr12 | Body    | 1.09 | (0.71; 1.66) | 7.0E-01 |



|            |                |       |         |      |              |         |
|------------|----------------|-------|---------|------|--------------|---------|
| cg16627193 | <i>PTPRN2</i>  | chr7  | Body    | 0.94 | (0.69; 1.29) | 7.0E-01 |
| cg23229205 | <i>AKAP13</i>  | chr15 | 5'UTR   | 0.93 | (0.66; 1.32) | 7.0E-01 |
| cg06184056 | <i>FBXO32</i>  | chr8  | TSS1500 | 1.06 | (0.77; 1.47) | 7.0E-01 |
| cg06184056 | <i>FBXO32</i>  | chr8  | Body    | 1.06 | (0.77; 1.47) | 7.0E-01 |
| cg26975265 | <i>MTCL1</i>   | chr18 | Body    | 0.94 | (0.7; 1.28)  | 7.0E-01 |
| cg20559657 | <i>PTPRS</i>   | chr19 | 5'UTR   | 1.1  | (0.68; 1.77) | 7.0E-01 |
| cg03750952 | <i>CTDSPL2</i> | chr15 | TSS1500 | 0.9  | (0.53; 1.54) | 7.0E-01 |
| cg07816047 | <i>CTDSPL</i>  | chr3  | Body    | 1.1  | (0.67; 1.82) | 7.0E-01 |
| cg12032045 | <i>TENM2</i>   | chr5  | Body    | 0.94 | (0.66; 1.32) | 7.0E-01 |
| cg19149693 | <i>ZBTB20</i>  | chr3  | 5'UTR   | 0.93 | (0.65; 1.33) | 7.0E-01 |
| cg09847027 | <i>WAC</i>     | chr10 | Body    | 0.94 | (0.67; 1.31) | 7.0E-01 |
| cg26606397 | <i>RAP1B</i>   | chr12 | 5'UTR   | 0.94 | (0.68; 1.3)  | 7.0E-01 |
| cg26606397 | <i>RAP1B</i>   | chr12 | 1stExon | 0.94 | (0.68; 1.3)  | 7.0E-01 |
| cg25654366 | <i>ERI3</i>    | chr1  | Body    | 0.91 | (0.57; 1.46) | 7.0E-01 |
| cg05374412 | <i>CDH13</i>   | chr16 | 1stExon | 1.08 | (0.73; 1.6)  | 7.0E-01 |
| cg02413048 | <i>TENM2</i>   | chr5  | Body    | 0.94 | (0.66; 1.32) | 7.0E-01 |
| cg00663719 | <i>WVOX</i>    | chr16 | Body    | 1.09 | (0.7; 1.69)  | 7.0E-01 |
| cg01082843 | <i>UNC80</i>   | chr2  | 1stExon | 0.94 | (0.67; 1.31) | 7.0E-01 |
| cg02536545 | <i>AKAP13</i>  | chr15 | Body    | 0.94 | (0.68; 1.3)  | 7.1E-01 |
| cg13800273 | <i>TNRC6C</i>  | chr17 | Body    | 0.94 | (0.68; 1.3)  | 7.1E-01 |
| cg23257256 | <i>ATF7IP</i>  | chr12 | 5'UTR   | 1.15 | (0.56; 2.35) | 7.1E-01 |
| cg23257256 | <i>ATF7IP</i>  | chr12 | 1stExon | 1.15 | (0.56; 2.35) | 7.1E-01 |
| cg02204363 | <i>TENM2</i>   | chr5  | Body    | 0.93 | (0.65; 1.35) | 7.1E-01 |
| cg06138156 | <i>PTPRN2</i>  | chr7  | Body    | 0.94 | (0.67; 1.31) | 7.1E-01 |
| cg13015528 | <i>CDH13</i>   | chr16 | Body    | 1.06 | (0.78; 1.44) | 7.1E-01 |
| cg17415451 | <i>CTNND2</i>  | chr5  | Body    | 0.94 | (0.7; 1.28)  | 7.1E-01 |
| cg12270633 | <i>SGIP1</i>   | chr1  | Body    | 1.07 | (0.75; 1.54) | 7.1E-01 |
| cg05259094 | <i>FBXO31</i>  | chr16 | Body    | 1.08 | (0.73; 1.58) | 7.1E-01 |
| cg03611057 | <i>PTPRN2</i>  | chr7  | Body    | 0.93 | (0.62; 1.38) | 7.1E-01 |
| cg02822717 | <i>SUGCT</i>   | chr7  | Body    | 1.06 | (0.79; 1.43) | 7.1E-01 |
| cg01966636 | <i>UBE2E2</i>  | chr3  | Body    | 1.07 | (0.76; 1.49) | 7.1E-01 |
| cg14609593 | <i>RNU5E-1</i> | chr5  | Body    | 1.08 | (0.71; 1.65) | 7.1E-01 |
| cg12415687 | <i>PTPRN2</i>  | chr7  | Body    | 1.09 | (0.7; 1.71)  | 7.1E-01 |
| cg06884854 | <i>WVOX</i>    | chr16 | Body    | 1.07 | (0.76; 1.5)  | 7.1E-01 |
| cg07471768 | <i>RTN4RL1</i> | chr17 | Body    | 1.1  | (0.67; 1.81) | 7.1E-01 |
| cg02959759 | <i>CACNA1C</i> | chr12 | 3'UTR   | 1.08 | (0.73; 1.6)  | 7.1E-01 |
| cg07176561 | <i>PTPRN2</i>  | chr7  | Body    | 0.94 | (0.7; 1.28)  | 7.1E-01 |
| cg08166587 | <i>CACNA1C</i> | chr12 | Body    | 1.07 | (0.74; 1.56) | 7.1E-01 |
| cg01491398 | <i>PTPRN2</i>  | chr7  | Body    | 0.93 | (0.63; 1.37) | 7.1E-01 |
| cg05372614 | <i>FBXO36</i>  | chr2  | Body    | 1.1  | (0.66; 1.84) | 7.1E-01 |
| cg19564615 | <i>FBXO31</i>  | chr16 | Body    | 0.94 | (0.66; 1.33) | 7.1E-01 |
| cg09136067 | <i>PHACTR1</i> | chr6  | Body    | 0.82 | (0.28; 2.38) | 7.1E-01 |
| cg22507969 | <i>CNTNAP2</i> | chr7  | Body    | 0.94 | (0.69; 1.28) | 7.1E-01 |
| cg06892796 | <i>PTPRN2</i>  | chr7  | Body    | 0.94 | (0.7; 1.28)  | 7.1E-01 |
| cg14752176 | <i>PTPRN2</i>  | chr7  | Body    | 0.94 | (0.68; 1.3)  | 7.1E-01 |
| cg19368325 | <i>PTPRN2</i>  | chr7  | Body    | 1.06 | (0.79; 1.42) | 7.1E-01 |
| cg13550230 | <i>SRSF10</i>  | chr1  | Body    | 0.91 | (0.55; 1.5)  | 7.1E-01 |
| cg23808061 | <i>CEP350</i>  | chr1  | TSS1500 | 0.94 | (0.69; 1.29) | 7.1E-01 |
| cg08106847 | <i>PTPRN2</i>  | chr7  | Body    | 1.05 | (0.81; 1.37) | 7.1E-01 |
| cg14051111 | <i>PTPRN2</i>  | chr7  | Body    | 1.06 | (0.78; 1.45) | 7.1E-01 |
| cg26963892 | <i>CDH11</i>   | chr16 | Body    | 0.93 | (0.65; 1.34) | 7.1E-01 |
| cg08141495 | <i>NOL4</i>    | chr18 | Body    | 0.93 | (0.62; 1.38) | 7.1E-01 |
| cg08774817 | <i>CNTNAP2</i> | chr7  | Body    | 0.94 | (0.66; 1.33) | 7.1E-01 |
| cg03377073 | <i>PTPRN2</i>  | chr7  | Body    | 0.94 | (0.7; 1.27)  | 7.1E-01 |
| cg04051640 | <i>CACNA1C</i> | chr12 | Body    | 0.93 | (0.62; 1.38) | 7.1E-01 |
| cg20349650 | <i>ZBTB20</i>  | chr3  | TSS1500 | 1.07 | (0.76; 1.5)  | 7.1E-01 |
| cg20349650 | <i>ZBTB20</i>  | chr3  | 5'UTR   | 1.07 | (0.76; 1.5)  | 7.1E-01 |
| cg04996219 | <i>CTNND2</i>  | chr5  | TSS200  | 0.93 | (0.66; 1.33) | 7.1E-01 |
| cg21875543 | <i>WVOX</i>    | chr16 | Body    | 0.93 | (0.62; 1.38) | 7.1E-01 |
| cg27658314 | <i>PTPRN2</i>  | chr7  | Body    | 1.06 | (0.77; 1.48) | 7.1E-01 |
| cg08055667 | <i>FBXO33</i>  | chr14 | Body    | 1.06 | (0.79; 1.42) | 7.1E-01 |



|            |                  |       |         |      |              |         |
|------------|------------------|-------|---------|------|--------------|---------|
| cg17439009 | <i>ATF7IP</i>    | chr12 | TSS1500 | 0.94 | (0.7; 1.28)  | 7.1E-01 |
| cg22599122 | <i>HMGB4</i>     | chr1  | 5'UTR   | 1.09 | (0.68; 1.77) | 7.1E-01 |
| cg22599122 | <i>HMGB4</i>     | chr1  | 1stExon | 1.09 | (0.68; 1.77) | 7.1E-01 |
| cg22599122 | <i>CSMD2</i>     | chr1  | Body    | 1.09 | (0.68; 1.77) | 7.1E-01 |
| cg18601017 | <i>PTPRN2</i>    | chr7  | Body    | 0.94 | (0.69; 1.29) | 7.1E-01 |
| cg01788159 | <i>AKAP13</i>    | chr15 | Body    | 1.06 | (0.77; 1.46) | 7.1E-01 |
| cg16571642 | <i>PTPRN2</i>    | chr7  | Body    | 0.94 | (0.69; 1.28) | 7.1E-01 |
| cg17526573 | <i>NRXN1</i>     | chr2  | Body    | 0.91 | (0.56; 1.49) | 7.1E-01 |
| cg17526573 | <i>NRXN1</i>     | chr2  | 1stExon | 0.91 | (0.56; 1.49) | 7.1E-01 |
| cg17526573 | <i>NRXN1</i>     | chr2  | 5'UTR   | 0.91 | (0.56; 1.49) | 7.1E-01 |
| cg24018609 | <i>CSMD2</i>     | chr1  | Body    | 1.06 | (0.77; 1.47) | 7.1E-01 |
| cg23946623 | <i>NRXN1</i>     | chr2  | TSS1500 | 1.07 | (0.76; 1.49) | 7.1E-01 |
| cg18354923 | <i>ACVR2A</i>    | chr2  | 5'UTR   | 1.06 | (0.77; 1.47) | 7.1E-01 |
| cg18354923 | <i>ACVR2A</i>    | chr2  | TSS200  | 1.06 | (0.77; 1.47) | 7.1E-01 |
| cg08247938 | <i>COL5A2</i>    | chr2  | Body    | 1.06 | (0.77; 1.47) | 7.1E-01 |
| cg03651585 | <i>SUGCT</i>     | chr7  | Body    | 0.93 | (0.61; 1.4)  | 7.1E-01 |
| cg02445395 | <i>PTPRN2</i>    | chr7  | Body    | 0.93 | (0.64; 1.36) | 7.1E-01 |
| cg20973260 | <i>CTDSPL2</i>   | chr15 | TSS1500 | 0.94 | (0.68; 1.3)  | 7.1E-01 |
| cg19208749 | <i>PTPRN2</i>    | chr7  | Body    | 0.94 | (0.7; 1.28)  | 7.1E-01 |
| cg26296479 | <i>TNFRSF10B</i> | chr8  | Body    | 1.09 | (0.69; 1.73) | 7.1E-01 |
| cg26296479 | <i>TNFRSF10B</i> | chr8  | 3'UTR   | 1.09 | (0.69; 1.73) | 7.1E-01 |
| cg02802834 | <i>PTPRN2</i>    | chr7  | Body    | 1.07 | (0.74; 1.54) | 7.1E-01 |
| cg04277812 | <i>ORC4</i>      | chr2  | 5'UTR   | 0.94 | (0.66; 1.32) | 7.1E-01 |
| cg21417259 | <i>TNRC18</i>    | chr7  | Body    | 0.93 | (0.65; 1.35) | 7.1E-01 |
| cg18437625 | <i>CUX2</i>      | chr12 | Body    | 1.07 | (0.75; 1.51) | 7.1E-01 |
| cg11717251 | <i>PTPRN2</i>    | chr7  | Body    | 1.06 | (0.77; 1.47) | 7.1E-01 |
| cg21302709 | <i>SUGCT</i>     | chr7  | Body    | 0.94 | (0.69; 1.29) | 7.1E-01 |
| cg26247093 | <i>GNA12</i>     | chr7  | Body    | 1.1  | (0.65; 1.86) | 7.1E-01 |
| cg02041981 | <i>PTPRN2</i>    | chr7  | Body    | 0.95 | (0.7; 1.27)  | 7.1E-01 |
| cg26593722 | <i>FBXO31</i>    | chr16 | Body    | 1.06 | (0.77; 1.45) | 7.1E-01 |
| cg01707076 | <i>PTPRN2</i>    | chr7  | Body    | 1.07 | (0.75; 1.53) | 7.1E-01 |
| cg25686162 | <i>MBD5</i>      | chr2  | 1stExon | 1.07 | (0.75; 1.52) | 7.1E-01 |
| cg16754490 | <i>PTPRN2</i>    | chr7  | Body    | 0.93 | (0.62; 1.39) | 7.1E-01 |
| cg11922514 | <i>UNC80</i>     | chr2  | Body    | 0.93 | (0.64; 1.35) | 7.1E-01 |
| cg00400370 | <i>CTNND2</i>    | chr5  | Body    | 1.08 | (0.7; 1.67)  | 7.1E-01 |
| cg00400370 | <i>CTNND2</i>    | chr5  | ExonBnd | 1.08 | (0.7; 1.67)  | 7.1E-01 |
| cg15948324 | <i>PTPRN2</i>    | chr7  | Body    | 1.06 | (0.78; 1.43) | 7.1E-01 |
| cg23851515 | <i>NRXN1</i>     | chr2  | Body    | 0.93 | (0.65; 1.35) | 7.1E-01 |
| cg15820189 | <i>RECQL5</i>    | chr17 | TSS1500 | 0.94 | (0.69; 1.29) | 7.1E-01 |
| cg15000722 | <i>PTPRN2</i>    | chr7  | Body    | 1.06 | (0.78; 1.45) | 7.1E-01 |
| cg14593273 | <i>PTPRN2</i>    | chr7  | Body    | 0.94 | (0.67; 1.31) | 7.1E-01 |
| cg22516725 | <i>WWOX</i>      | chr16 | Body    | 1.06 | (0.79; 1.42) | 7.2E-01 |
| cg16175263 | <i>TNFRSF10C</i> | chr8  | TSS200  | 0.94 | (0.68; 1.3)  | 7.2E-01 |
| cg16100063 | <i>PEX14</i>     | chr1  | Body    | 1.06 | (0.79; 1.42) | 7.2E-01 |
| cg11934257 | <i>PTPRN2</i>    | chr7  | Body    | 0.94 | (0.68; 1.3)  | 7.2E-01 |
| cg13843366 | <i>CACNA1C</i>   | chr12 | Body    | 0.92 | (0.57; 1.47) | 7.2E-01 |
| cg10971874 | <i>PEX14</i>     | chr1  | TSS200  | 1.06 | (0.78; 1.44) | 7.2E-01 |
| cg02355558 | <i>CTDSPL</i>    | chr3  | Body    | 0.94 | (0.69; 1.29) | 7.2E-01 |
| cg11206969 | <i>TNFRSF11A</i> | chr18 | Body    | 0.85 | (0.36; 2.03) | 7.2E-01 |
| cg22788908 | <i>POU2F1</i>    | chr1  | 5'UTR   | 0.94 | (0.67; 1.31) | 7.2E-01 |
| cg27538117 | <i>TNFRSF19</i>  | chr13 | 5'UTR   | 0.94 | (0.67; 1.32) | 7.2E-01 |
| cg27538117 | <i>TNFRSF19</i>  | chr13 | TSS200  | 0.94 | (0.67; 1.32) | 7.2E-01 |
| cg17247365 | <i>WWOX</i>      | chr16 | Body    | 1.06 | (0.78; 1.45) | 7.2E-01 |
| cg25740602 | <i>TNFRSF11A</i> | chr18 | 3'UTR   | 0.95 | (0.7; 1.27)  | 7.2E-01 |
| cg23320693 | <i>TNFRSF1A</i>  | chr12 | Body    | 0.93 | (0.64; 1.36) | 7.2E-01 |
| cg24857686 | <i>FBXO36</i>    | chr2  | Body    | 1.06 | (0.78; 1.44) | 7.2E-01 |
| cg20616246 | <i>CEP350</i>    | chr1  | ExonBnd | 1.06 | (0.76; 1.49) | 7.2E-01 |
| cg20616246 | <i>CEP350</i>    | chr1  | Body    | 1.06 | (0.76; 1.49) | 7.2E-01 |
| cg12337622 | <i>PTPRN2</i>    | chr7  | Body    | 1.06 | (0.79; 1.42) | 7.2E-01 |
| cg07061728 | <i>RTN4RL1</i>   | chr17 | Body    | 1.07 | (0.74; 1.55) | 7.2E-01 |
| cg11665613 | <i>TNFRSF1B</i>  | chr1  | 3'UTR   | 1.07 | (0.74; 1.56) | 7.2E-01 |



|            |         |       |         |      |              |         |
|------------|---------|-------|---------|------|--------------|---------|
| cg07552731 | AKAP13  | chr15 | Body    | 0.94 | (0.67; 1.32) | 7.2E-01 |
| cg13214121 | PTPRN2  | chr7  | Body    | 0.94 | (0.66; 1.33) | 7.2E-01 |
| cg17868330 | CNTNAP2 | chr7  | Body    | 1.08 | (0.72; 1.61) | 7.2E-01 |
| cg12110750 | TSHZ3   | chr19 | Body    | 0.92 | (0.58; 1.46) | 7.2E-01 |
| cg08263214 | ZBTB20  | chr3  | TSS1500 | 0.92 | (0.57; 1.47) | 7.2E-01 |
| cg08263214 | ZBTB20  | chr3  | Body    | 0.92 | (0.57; 1.47) | 7.2E-01 |
| cg08263214 | ZBTB20  | chr3  | 5'UTR   | 0.92 | (0.57; 1.47) | 7.2E-01 |
| cg07733471 | CUX2    | chr12 | Body    | 1.06 | (0.77; 1.47) | 7.2E-01 |
| cg23667104 | WWOX    | chr16 | Body    | 0.93 | (0.63; 1.38) | 7.2E-01 |
| cg22730626 | PTPRN2  | chr7  | Body    | 1.06 | (0.76; 1.48) | 7.2E-01 |
| cg06141968 | SMARCD3 | chr7  | Body    | 0.95 | (0.7; 1.28)  | 7.2E-01 |
| cg04594619 | ARID1A  | chr1  | Body    | 0.92 | (0.58; 1.45) | 7.2E-01 |
| cg07352158 | FSTL1   | chr3  | TSS1500 | 1.06 | (0.78; 1.42) | 7.2E-01 |
| cg14141549 | PTPRN2  | chr7  | Body    | 0.95 | (0.71; 1.27) | 7.2E-01 |
| cg19231811 | PHACTR1 | chr6  | Body    | 0.92 | (0.57; 1.47) | 7.2E-01 |
| cg08677803 | MTNR1A  | chr4  | Body    | 1.06 | (0.78; 1.43) | 7.2E-01 |
| cg16029747 | PTPRN2  | chr7  | Body    | 1.06 | (0.78; 1.43) | 7.2E-01 |
| cg16777782 | CDH13   | chr16 | Body    | 0.94 | (0.67; 1.32) | 7.2E-01 |
| cg16775908 | ZBTB20  | chr3  | Body    | 1.06 | (0.76; 1.48) | 7.2E-01 |
| cg16775908 | ZBTB20  | chr3  | 5'UTR   | 1.06 | (0.76; 1.48) | 7.2E-01 |
| cg03827813 | MBD5    | chr2  | 5'UTR   | 0.89 | (0.47; 1.68) | 7.2E-01 |
| cg06080068 | PEX14   | chr1  | Body    | 0.95 | (0.72; 1.25) | 7.2E-01 |
| cg23828283 | TNR     | chr1  | 5'UTR   | 0.93 | (0.65; 1.35) | 7.2E-01 |
| cg17803268 | PTPRN2  | chr7  | Body    | 0.95 | (0.71; 1.27) | 7.2E-01 |
| cg06669892 | PHACTR1 | chr6  | Body    | 0.93 | (0.62; 1.39) | 7.2E-01 |
| cg24860812 | BRUNOL4 | chr18 | Body    | 1.05 | (0.79; 1.41) | 7.2E-01 |
| cg04313978 | PTPRN2  | chr7  | Body    | 0.95 | (0.71; 1.27) | 7.2E-01 |
| cg22581289 | SUGCT   | chr7  | Body    | 1.07 | (0.75; 1.53) | 7.2E-01 |
| cg20134805 | WWOX    | chr16 | Body    | 1.07 | (0.74; 1.55) | 7.2E-01 |
| cg14494365 | PTPRN2  | chr7  | Body    | 0.92 | (0.58; 1.45) | 7.2E-01 |
| cg19341106 | PTPRN2  | chr7  | Body    | 0.94 | (0.69; 1.3)  | 7.2E-01 |
| cg11875706 | RECQL5  | chr17 | Body    | 1.06 | (0.77; 1.45) | 7.2E-01 |
| cg07015203 | UNC80   | chr2  | Body    | 1.06 | (0.75; 1.5)  | 7.2E-01 |
| cg07509352 | CDH13   | chr16 | Body    | 0.95 | (0.7; 1.28)  | 7.2E-01 |
| cg22894604 | FSTL1   | chr3  | 3'UTR   | 1.06 | (0.77; 1.46) | 7.2E-01 |
| cg03873608 | DMXL2   | chr15 | Body    | 1.07 | (0.74; 1.55) | 7.2E-01 |
| cg11797573 | PTPRN2  | chr7  | Body    | 1.06 | (0.77; 1.47) | 7.2E-01 |
| cg10502232 | ATP6V0C | chr16 | 1stExon | 0.94 | (0.67; 1.32) | 7.2E-01 |
| cg10502232 | ATP6V0C | chr16 | 5'UTR   | 0.94 | (0.67; 1.32) | 7.2E-01 |
| cg08945980 | CNTNAP2 | chr7  | Body    | 0.94 | (0.67; 1.31) | 7.2E-01 |
| cg15479114 | WAC     | chr10 | Body    | 0.94 | (0.66; 1.33) | 7.2E-01 |
| cg24226884 | CUX2    | chr12 | Body    | 0.92 | (0.58; 1.45) | 7.2E-01 |
| cg02759595 | ERI3    | chr1  | Body    | 1.06 | (0.76; 1.48) | 7.2E-01 |
| cg02759595 | ERI3    | chr1  | ExonBnd | 1.06 | (0.76; 1.48) | 7.2E-01 |
| cg19803671 | UBE2E2  | chr3  | 5'UTR   | 1.08 | (0.7; 1.66)  | 7.2E-01 |
| cg25036261 | NRXN1   | chr2  | Body    | 1.06 | (0.77; 1.45) | 7.2E-01 |
| cg20000539 | DDHD2   | chr8  | 3'UTR   | 0.94 | (0.66; 1.33) | 7.2E-01 |
| cg00641931 | WWOX    | chr16 | ExonBnd | 1.15 | (0.53; 2.5)  | 7.2E-01 |
| cg00641931 | WWOX    | chr16 | Body    | 1.15 | (0.53; 2.5)  | 7.2E-01 |
| cg16972831 | GNA12   | chr7  | Body    | 1.06 | (0.76; 1.49) | 7.2E-01 |
| cg02973644 | PTPRN2  | chr7  | Body    | 1.06 | (0.77; 1.47) | 7.2E-01 |
| cg10756881 | TNRC6B  | chr22 | 5'UTR   | 0.92 | (0.59; 1.44) | 7.2E-01 |
| cg06012903 | PTPRN2  | chr7  | Body    | 0.95 | (0.73; 1.25) | 7.2E-01 |
| cg11844087 | PTPRN2  | chr7  | Body    | 0.94 | (0.65; 1.35) | 7.2E-01 |
| cg06975753 | CTDSPL  | chr3  | Body    | 0.94 | (0.68; 1.31) | 7.2E-01 |
| cg02903680 | PDE8A   | chr15 | Body    | 1.08 | (0.7; 1.66)  | 7.2E-01 |
| cg09417234 | TNRC18  | chr7  | Body    | 1.06 | (0.78; 1.44) | 7.2E-01 |
| cg22093206 | CACNA1C | chr12 | Body    | 0.94 | (0.66; 1.34) | 7.2E-01 |
| cg06758980 | MBD5    | chr2  | TSS1500 | 0.94 | (0.66; 1.34) | 7.2E-01 |
| cg20357101 | ELAVL4  | chr1  | TSS1500 | 0.93 | (0.63; 1.37) | 7.2E-01 |
| cg20357101 | ELAVL4  | chr1  | TSS200  | 0.93 | (0.63; 1.37) | 7.2E-01 |



|            |              |       |         |      |              |         |
|------------|--------------|-------|---------|------|--------------|---------|
| cg20357101 | ELAVL4       | chr1  | Body    | 0.93 | (0.63; 1.37) | 7.2E-01 |
| cg00244328 | ATP8A1       | chr4  | TSS1500 | 1.06 | (0.76; 1.5)  | 7.2E-01 |
| cg02385725 | CPEB1        | chr15 | Body    | 0.93 | (0.63; 1.37) | 7.2E-01 |
| cg02385725 | CPEB1        | chr15 | 5'UTR   | 0.93 | (0.63; 1.37) | 7.2E-01 |
| cg00071658 | DACH1        | chr13 | Body    | 1.07 | (0.73; 1.58) | 7.2E-01 |
| cg15572489 | PTPRN2       | chr7  | Body    | 0.95 | (0.69; 1.29) | 7.2E-01 |
| cg14891617 | PTPRN2       | chr7  | Body    | 1.06 | (0.77; 1.45) | 7.2E-01 |
| cg20072792 | RECQL5       | chr17 | Body    | 0.95 | (0.69; 1.29) | 7.2E-01 |
| cg04279629 | DCUN1D4      | chr4  | Body    | 0.94 | (0.68; 1.3)  | 7.2E-01 |
| cg00991379 | TAOK3        | chr12 | Body    | 1.07 | (0.74; 1.54) | 7.2E-01 |
| cg13274437 | CUX2         | chr12 | Body    | 0.93 | (0.63; 1.38) | 7.2E-01 |
| cg08100806 | CDH11        | chr16 | TSS1500 | 0.91 | (0.52; 1.57) | 7.2E-01 |
| cg26361533 | CACNA1C      | chr12 | Body    | 1.11 | (0.63; 1.93) | 7.2E-01 |
| cg00665114 | TNR          | chr1  | 5'UTR   | 0.94 | (0.67; 1.33) | 7.3E-01 |
| cg15911194 | CDH13        | chr16 | Body    | 1.08 | (0.71; 1.64) | 7.3E-01 |
| cg07448800 | TENM2        | chr5  | Body    | 0.94 | (0.65; 1.35) | 7.3E-01 |
| cg21802919 | RTN4RL1      | chr17 | Body    | 1.06 | (0.76; 1.47) | 7.3E-01 |
| cg02820081 | MTCL1        | chr18 | Body    | 0.92 | (0.59; 1.44) | 7.3E-01 |
| cg00243547 | WAC          | chr10 | TSS1500 | 1.06 | (0.76; 1.49) | 7.3E-01 |
| cg00243547 | WAC          | chr10 | 5'UTR   | 1.06 | (0.76; 1.49) | 7.3E-01 |
| cg00391821 | PEX14        | chr1  | Body    | 1.08 | (0.72; 1.62) | 7.3E-01 |
| cg24758989 | TNFRSF11A    | chr18 | Body    | 0.93 | (0.63; 1.38) | 7.3E-01 |
| cg09557991 | TNFRSF1B     | chr1  | Body    | 1.06 | (0.78; 1.44) | 7.3E-01 |
| cg10553121 | WVOX         | chr16 | Body    | 1.06 | (0.76; 1.49) | 7.3E-01 |
| cg25363527 | PTPRN2       | chr7  | Body    | 1.07 | (0.74; 1.54) | 7.3E-01 |
| cg03525135 | PTPRN2       | chr7  | Body    | 0.94 | (0.66; 1.34) | 7.3E-01 |
| cg05814156 | PTPRU        | chr1  | ExonBnd | 0.94 | (0.65; 1.34) | 7.3E-01 |
| cg05814156 | PTPRU        | chr1  | Body    | 0.94 | (0.65; 1.34) | 7.3E-01 |
| cg02150363 | DNAI2        | chr17 | Body    | 0.95 | (0.7; 1.28)  | 7.3E-01 |
| cg07037986 | CDH13        | chr16 | Body    | 0.93 | (0.64; 1.36) | 7.3E-01 |
| cg13100918 | ATP8A1       | chr4  | Body    | 0.95 | (0.69; 1.29) | 7.3E-01 |
| cg21740631 | TENM2        | chr5  | Body    | 0.94 | (0.67; 1.32) | 7.3E-01 |
| cg21740631 | CTB-178M22.2 | chr5  | TSS1500 | 0.94 | (0.67; 1.32) | 7.3E-01 |
| cg17308981 | CHFR         | chr12 | Body    | 0.94 | (0.69; 1.3)  | 7.3E-01 |
| cg25510609 | AKAP13       | chr15 | Body    | 1.06 | (0.77; 1.47) | 7.3E-01 |
| cg00375056 | RNU5E-1      | chr5  | Body    | 0.93 | (0.6; 1.42)  | 7.3E-01 |
| cg05539750 | CDH13        | chr16 | 5'UTR   | 1.06 | (0.75; 1.5)  | 7.3E-01 |
| cg05539750 | CDH13        | chr16 | Body    | 1.06 | (0.75; 1.5)  | 7.3E-01 |
| cg03396151 | MEIS2        | chr15 | Body    | 0.95 | (0.7; 1.29)  | 7.3E-01 |
| cg14374754 | BARX1        | chr9  | 3'UTR   | 0.92 | (0.59; 1.44) | 7.3E-01 |
| cg00236831 | ATF7IP       | chr12 | 5'UTR   | 1.06 | (0.77; 1.45) | 7.3E-01 |
| cg00236831 | ATF7IP       | chr12 | 1stExon | 1.06 | (0.77; 1.45) | 7.3E-01 |
| cg12077319 | ZNF704       | chr8  | TSS200  | 1.06 | (0.76; 1.49) | 7.3E-01 |
| cg05880029 | SLC16A9      | chr10 | 5'UTR   | 0.95 | (0.71; 1.27) | 7.3E-01 |
| cg14862829 | AKAP13       | chr15 | Body    | 0.94 | (0.65; 1.35) | 7.3E-01 |
| cg24604127 | PTPRN2       | chr7  | Body    | 0.95 | (0.69; 1.3)  | 7.3E-01 |
| cg13574857 | PTPRN2       | chr7  | Body    | 1.06 | (0.76; 1.48) | 7.3E-01 |
| cg23220435 | PTPRN2       | chr7  | Body    | 0.94 | (0.67; 1.33) | 7.3E-01 |
| cg20679252 | CSMD2        | chr1  | Body    | 1.05 | (0.78; 1.42) | 7.3E-01 |
| cg04538404 | FBXO11       | chr2  | TSS1500 | 0.92 | (0.59; 1.44) | 7.3E-01 |
| cg04538404 | FBXO11       | chr2  | Body    | 0.92 | (0.59; 1.44) | 7.3E-01 |
| cg01672894 | FBXO31       | chr16 | Body    | 1.07 | (0.74; 1.53) | 7.3E-01 |
| cg01672894 | FBXO31       | chr16 | 3'UTR   | 1.07 | (0.74; 1.53) | 7.3E-01 |
| cg11323848 | CUX2         | chr12 | Body    | 1.06 | (0.76; 1.48) | 7.3E-01 |
| cg18364718 | NDUFA9       | chr12 | Body    | 1.09 | (0.67; 1.77) | 7.3E-01 |
| cg12033578 | RAP1B        | chr12 | Body    | 1.07 | (0.72; 1.59) | 7.3E-01 |
| cg14994205 | EIF2S1       | chr14 | 5'UTR   | 0.94 | (0.65; 1.35) | 7.3E-01 |
| cg07622504 | TAOK3        | chr12 | Body    | 0.94 | (0.65; 1.35) | 7.3E-01 |
| cg24807175 | PTPRN2       | chr7  | Body    | 0.94 | (0.66; 1.34) | 7.3E-01 |
| cg14092099 | WVOX         | chr16 | Body    | 1.06 | (0.75; 1.52) | 7.3E-01 |
| cg22709362 | ERI3         | chr1  | Body    | 1.09 | (0.66; 1.8)  | 7.3E-01 |



|            |                     |       |         |      |              |         |
|------------|---------------------|-------|---------|------|--------------|---------|
| cg23849410 | <i>UNC80</i>        | chr2  | Body    | 0.88 | (0.42; 1.84) | 7.3E-01 |
| cg07617120 | <i>PTPRN2</i>       | chr7  | Body    | 1.06 | (0.78; 1.44) | 7.3E-01 |
| cg23091984 | <i>TSHZ3</i>        | chr19 | Body    | 1.06 | (0.77; 1.44) | 7.3E-01 |
| cg01007029 | <i>FBXO32</i>       | chr8  | TSS200  | 0.95 | (0.7; 1.28)  | 7.3E-01 |
| cg23684218 | <i>PTPRN2</i>       | chr7  | Body    | 1.06 | (0.76; 1.48) | 7.3E-01 |
| cg03490965 | <i>TENM2</i>        | chr5  | Body    | 0.95 | (0.69; 1.29) | 7.3E-01 |
| cg12136895 | <i>ARID1A</i>       | chr1  | 3'UTR   | 0.93 | (0.63; 1.38) | 7.3E-01 |
| cg10565996 | <i>DCUN1D4</i>      | chr4  | TSS200  | 0.95 | (0.71; 1.27) | 7.3E-01 |
| cg19977866 | <i>MTNR1B</i>       | chr11 | Body    | 1.05 | (0.78; 1.43) | 7.3E-01 |
| cg15453443 | <i>PTPRN2</i>       | chr7  | Body    | 0.94 | (0.67; 1.33) | 7.3E-01 |
| cg26204417 | <i>PTPRN2</i>       | chr7  | Body    | 1.06 | (0.77; 1.44) | 7.3E-01 |
| cg13420383 | <i>LOC100130933</i> | chr17 | TSS200  | 1.13 | (0.57; 2.24) | 7.3E-01 |
| cg13420383 | <i>RECQL5</i>       | chr17 | Body    | 1.13 | (0.57; 2.24) | 7.3E-01 |
| cg06103031 | <i>BRUNOL4</i>      | chr18 | TSS1500 | 0.94 | (0.67; 1.32) | 7.3E-01 |
| cg21449444 | <i>PTPRS</i>        | chr19 | Body    | 0.94 | (0.67; 1.32) | 7.3E-01 |
| cg03068874 | <i>PTPRN2</i>       | chr7  | Body    | 1.06 | (0.75; 1.5)  | 7.3E-01 |
| cg18791223 | <i>PTPRN2</i>       | chr7  | Body    | 0.94 | (0.67; 1.32) | 7.3E-01 |
| cg03640051 | <i>ATP8A1</i>       | chr4  | Body    | 0.94 | (0.66; 1.34) | 7.3E-01 |
| cg19719838 | <i>DDHD2</i>        | chr8  | 5'UTR   | 0.95 | (0.7; 1.29)  | 7.3E-01 |
| cg19719838 | <i>DDHD2</i>        | chr8  | TSS200  | 0.95 | (0.7; 1.29)  | 7.3E-01 |
| cg13246235 | <i>PHACTR1</i>      | chr6  | Body    | 0.9  | (0.49; 1.66) | 7.3E-01 |
| cg24831391 | <i>CACNA1C</i>      | chr12 | Body    | 1.06 | (0.75; 1.49) | 7.3E-01 |
| cg03812546 | <i>TAOK3</i>        | chr12 | 5'UTR   | 1.06 | (0.77; 1.44) | 7.3E-01 |
| cg14125904 | <i>DNAI2</i>        | chr17 | Body    | 1.08 | (0.68; 1.73) | 7.3E-01 |
| cg22524174 | <i>TSHZ3</i>        | chr19 | Body    | 0.94 | (0.68; 1.31) | 7.3E-01 |
| cg24450184 | <i>PTPRN2</i>       | chr7  | Body    | 0.94 | (0.66; 1.35) | 7.3E-01 |
| cg05227268 | <i>TNFRSF10D</i>    | chr8  | Body    | 0.93 | (0.63; 1.38) | 7.3E-01 |
| cg05227268 | <i>TNFRSF10D</i>    | chr8  | ExonBnd | 0.93 | (0.63; 1.38) | 7.3E-01 |
| cg09644309 | <i>DACH1</i>        | chr13 | Body    | 1.11 | (0.62; 1.99) | 7.3E-01 |
| cg06649856 | <i>PTPRN2</i>       | chr7  | Body    | 0.92 | (0.56; 1.5)  | 7.3E-01 |
| cg09565159 | <i>PTPRN2</i>       | chr7  | Body    | 0.94 | (0.66; 1.35) | 7.3E-01 |
| cg24466280 | <i>ALCAM</i>        | chr3  | Body    | 0.93 | (0.62; 1.39) | 7.3E-01 |
| cg27506975 | <i>CEP350</i>       | chr1  | Body    | 1.15 | (0.51; 2.57) | 7.3E-01 |
| cg13640972 | <i>PTPRN2</i>       | chr7  | Body    | 0.95 | (0.68; 1.31) | 7.3E-01 |
| cg17892759 | <i>PTPRN2</i>       | chr7  | Body    | 1.06 | (0.75; 1.49) | 7.3E-01 |
| cg23829076 | <i>TSHZ3</i>        | chr19 | Body    | 1.11 | (0.6; 2.05)  | 7.3E-01 |
| cg25139286 | <i>AKAP13</i>       | chr15 | Body    | 1.06 | (0.76; 1.46) | 7.3E-01 |
| cg14858993 | <i>GNA12</i>        | chr7  | Body    | 0.95 | (0.69; 1.3)  | 7.3E-01 |
| cg01622718 | <i>PTPRN2</i>       | chr7  | Body    | 0.94 | (0.68; 1.31) | 7.3E-01 |
| cg23525243 | <i>CTNND2</i>       | chr5  | Body    | 1.06 | (0.76; 1.47) | 7.3E-01 |
| cg21048927 | <i>FBXO36</i>       | chr2  | Body    | 1.06 | (0.77; 1.44) | 7.4E-01 |
| cg11976367 | <i>MTCL1</i>        | chr18 | TSS1500 | 1.06 | (0.76; 1.49) | 7.4E-01 |
| cg05674637 | <i>CACNA1C</i>      | chr12 | Body    | 0.95 | (0.68; 1.31) | 7.4E-01 |
| cg24869815 | <i>LOC100130933</i> | chr17 | TSS200  | 1.14 | (0.53; 2.46) | 7.4E-01 |
| cg24869815 | <i>RECQL5</i>       | chr17 | Body    | 1.14 | (0.53; 2.46) | 7.4E-01 |
| cg04172561 | <i>TNFRSF10D</i>    | chr8  | Body    | 0.94 | (0.67; 1.32) | 7.4E-01 |
| cg00073140 | <i>CACNA1C</i>      | chr12 | Body    | 0.94 | (0.67; 1.32) | 7.4E-01 |
| cg15067015 | <i>TNR</i>          | chr1  | 5'UTR   | 0.93 | (0.63; 1.38) | 7.4E-01 |
| cg17376415 | <i>PTPRN2</i>       | chr7  | Body    | 0.94 | (0.65; 1.35) | 7.4E-01 |
| cg17125804 | <i>CUX2</i>         | chr12 | Body    | 0.94 | (0.68; 1.32) | 7.4E-01 |
| cg03282283 | <i>CACNA1C</i>      | chr12 | Body    | 1.12 | (0.58; 2.17) | 7.4E-01 |
| cg16785161 | <i>ATF7</i>         | chr12 | TSS1500 | 1.06 | (0.75; 1.51) | 7.4E-01 |
| cg16785161 | <i>ATF7</i>         | chr12 | TSS200  | 1.06 | (0.75; 1.51) | 7.4E-01 |
| cg27078729 | <i>TNRC6A</i>       | chr16 | 3'UTR   | 0.95 | (0.68; 1.31) | 7.4E-01 |
| cg15798999 | <i>ARID1A</i>       | chr1  | Body    | 0.95 | (0.69; 1.3)  | 7.4E-01 |
| cg15677954 | <i>ZBTB20</i>       | chr3  | Body    | 1.07 | (0.72; 1.58) | 7.4E-01 |
| cg15677954 | <i>ZBTB20</i>       | chr3  | 5'UTR   | 1.07 | (0.72; 1.58) | 7.4E-01 |
| cg00092611 | <i>WAC</i>          | chr10 | TSS1500 | 0.95 | (0.71; 1.27) | 7.4E-01 |
| cg00092611 | <i>WAC</i>          | chr10 | Body    | 0.95 | (0.71; 1.27) | 7.4E-01 |
| cg24682307 | <i>TNFRSF1B</i>     | chr1  | 1stExon | 0.94 | (0.68; 1.32) | 7.4E-01 |
| cg24682307 | <i>TNFRSF1B</i>     | chr1  | 5'UTR   | 0.94 | (0.68; 1.32) | 7.4E-01 |



|            |           |       |         |      |              |         |
|------------|-----------|-------|---------|------|--------------|---------|
| cg19080839 | SMARCD3   | chr7  | Body    | 1.07 | (0.71; 1.63) | 7.4E-01 |
| cg00791181 | ZBTB20    | chr3  | Body    | 1.09 | (0.66; 1.8)  | 7.4E-01 |
| cg00791181 | ZBTB20    | chr3  | 5'UTR   | 1.09 | (0.66; 1.8)  | 7.4E-01 |
| cg11202265 | PTPRN2    | chr7  | Body    | 1.07 | (0.71; 1.61) | 7.4E-01 |
| cg03770808 | MTCL1     | chr18 | Body    | 0.94 | (0.63; 1.38) | 7.4E-01 |
| cg09443467 | TENM2     | chr5  | Body    | 1.07 | (0.73; 1.56) | 7.4E-01 |
| cg16477744 | PTPRN2    | chr7  | Body    | 0.91 | (0.51; 1.61) | 7.4E-01 |
| cg20495738 | CACNA1C   | chr12 | Body    | 1.06 | (0.75; 1.51) | 7.4E-01 |
| cg09599586 | SGIP1     | chr1  | Body    | 1.08 | (0.7; 1.64)  | 7.4E-01 |
| cg19963847 | DCUN1D4   | chr4  | Body    | 1.05 | (0.79; 1.4)  | 7.4E-01 |
| cg26593067 | PTPRN2    | chr7  | Body    | 0.93 | (0.61; 1.42) | 7.4E-01 |
| cg02720925 | TNRC18    | chr7  | Body    | 0.95 | (0.7; 1.29)  | 7.4E-01 |
| cg01144921 | ATP6V0C   | chr16 | TSS1500 | 1.05 | (0.77; 1.43) | 7.4E-01 |
| cg12271177 | SGIP1     | chr1  | Body    | 1.05 | (0.78; 1.42) | 7.4E-01 |
| cg09066883 | PTPRN2    | chr7  | Body    | 1.05 | (0.78; 1.43) | 7.4E-01 |
| cg21414048 | TAOK3     | chr12 | 5'UTR   | 1.06 | (0.75; 1.51) | 7.4E-01 |
| cg08135136 | ZBTB20    | chr3  | Body    | 0.93 | (0.59; 1.45) | 7.4E-01 |
| cg08135136 | ZBTB20    | chr3  | 5'UTR   | 0.93 | (0.59; 1.45) | 7.4E-01 |
| cg12581327 | NOL4      | chr18 | Body    | 0.95 | (0.7; 1.29)  | 7.4E-01 |
| cg03983213 | PTPRN2    | chr7  | Body    | 0.95 | (0.68; 1.32) | 7.4E-01 |
| cg10749574 | PTPRN2    | chr7  | Body    | 0.94 | (0.64; 1.37) | 7.4E-01 |
| cg05195085 | PTPRN2    | chr7  | Body    | 0.95 | (0.69; 1.3)  | 7.4E-01 |
| cg23816370 | CNTNAP2   | chr7  | Body    | 0.95 | (0.72; 1.26) | 7.4E-01 |
| cg02075713 | CDH13     | chr16 | Body    | 0.95 | (0.72; 1.27) | 7.4E-01 |
| cg05731713 | PTPRN2    | chr7  | Body    | 0.94 | (0.67; 1.32) | 7.4E-01 |
| cg01645753 | CPEB1     | chr15 | TSS200  | 0.95 | (0.69; 1.3)  | 7.4E-01 |
| cg17343444 | TENM2     | chr5  | Body    | 1.06 | (0.74; 1.53) | 7.4E-01 |
| cg16248584 | CDH13     | chr16 | Body    | 0.94 | (0.63; 1.38) | 7.4E-01 |
| cg24581795 | TNFRSF10B | chr8  | Body    | 1.07 | (0.73; 1.56) | 7.4E-01 |
| cg25259479 | PTPRN2    | chr7  | Body    | 0.94 | (0.65; 1.36) | 7.4E-01 |
| cg14147213 | MTCL1     | chr18 | Body    | 0.95 | (0.69; 1.3)  | 7.4E-01 |
| cg17198937 | CNTNAP2   | chr7  | Body    | 0.94 | (0.66; 1.35) | 7.4E-01 |
| cg22468235 | FBXO34    | chr14 | TSS1500 | 0.93 | (0.63; 1.4)  | 7.4E-01 |
| cg07748883 | BRUNOL4   | chr18 | Body    | 1.06 | (0.74; 1.54) | 7.4E-01 |
| cg22986084 | FBXO33    | chr14 | 1stExon | 0.95 | (0.68; 1.31) | 7.4E-01 |
| cg03727754 | CACNA1C   | chr12 | Body    | 0.95 | (0.68; 1.32) | 7.4E-01 |
| cg09068665 | CACNA1C   | chr12 | TSS200  | 1.06 | (0.76; 1.47) | 7.4E-01 |
| cg11470028 | COL5A2    | chr2  | Body    | 1.06 | (0.75; 1.51) | 7.4E-01 |
| cg03148419 | AKAP3     | chr12 | TSS1500 | 0.95 | (0.71; 1.27) | 7.4E-01 |
| cg12297440 | PTPRN2    | chr7  | Body    | 1.05 | (0.78; 1.42) | 7.4E-01 |
| cg17609204 | PTPRN2    | chr7  | Body    | 0.93 | (0.59; 1.46) | 7.4E-01 |
| cg21037610 | PTPRN2    | chr7  | Body    | 0.95 | (0.68; 1.32) | 7.4E-01 |
| cg21565196 | PTPRN2    | chr7  | Body    | 1.08 | (0.7; 1.66)  | 7.4E-01 |
| cg06871008 | CACNA1C   | chr12 | Body    | 1.09 | (0.66; 1.8)  | 7.4E-01 |
| cg20325291 | ARID1A    | chr1  | Body    | 0.94 | (0.66; 1.34) | 7.4E-01 |
| cg23544294 | ERI3      | chr1  | Body    | 0.95 | (0.68; 1.32) | 7.4E-01 |
| cg23544294 | ERI3      | chr1  | 5'UTR   | 0.95 | (0.68; 1.32) | 7.4E-01 |
| cg12429465 | SCAF8     | chr6  | 1stExon | 0.95 | (0.68; 1.32) | 7.4E-01 |
| cg12429465 | SCAF8     | chr6  | 5'UTR   | 0.95 | (0.68; 1.32) | 7.4E-01 |
| cg05508793 | CHFR      | chr12 | Body    | 0.95 | (0.69; 1.31) | 7.4E-01 |
| cg13589945 | SCAF8     | chr6  | Body    | 1.06 | (0.75; 1.51) | 7.4E-01 |
| cg03517730 | CSMD2     | chr1  | Body    | 0.94 | (0.66; 1.35) | 7.4E-01 |
| cg25607226 | PTPRN2    | chr7  | Body    | 1.05 | (0.79; 1.4)  | 7.4E-01 |
| cg12238812 | CHFR      | chr12 | TSS1500 | 1.06 | (0.75; 1.5)  | 7.4E-01 |
| cg17120445 | CUX2      | chr12 | Body    | 1.06 | (0.74; 1.52) | 7.4E-01 |
| cg13906811 | NRXN1     | chr2  | Body    | 0.93 | (0.61; 1.42) | 7.4E-01 |
| cg13906811 | NRXN1     | chr2  | TSS200  | 0.93 | (0.61; 1.42) | 7.4E-01 |
| cg14362920 | PTPRN2    | chr7  | 3'UTR   | 1.06 | (0.76; 1.47) | 7.4E-01 |
| cg13323391 | PTPRN2    | chr7  | Body    | 0.95 | (0.69; 1.31) | 7.4E-01 |
| cg24646841 | PTPRN2    | chr7  | Body    | 0.94 | (0.64; 1.37) | 7.4E-01 |
| cg15785147 | UBE2E2    | chr3  | Body    | 1.07 | (0.72; 1.58) | 7.4E-01 |



|            |                  |       |         |      |              |         |
|------------|------------------|-------|---------|------|--------------|---------|
| cg10569526 | <i>CPEB1</i>     | chr15 | Body    | 1.06 | (0.75; 1.49) | 7.4E-01 |
| cg10569526 | <i>CPEB1</i>     | chr15 | 5'UTR   | 1.06 | (0.75; 1.49) | 7.4E-01 |
| cg13501507 | <i>DMXL2</i>     | chr15 | TSS1500 | 0.95 | (0.71; 1.28) | 7.4E-01 |
| cg18812366 | <i>PHACTR1</i>   | chr6  | Body    | 0.95 | (0.69; 1.31) | 7.4E-01 |
| cg22652747 | <i>MEIS2</i>     | chr15 | Body    | 0.94 | (0.63; 1.39) | 7.4E-01 |
| cg18694936 | <i>CCDC80</i>    | chr3  | Body    | 0.94 | (0.65; 1.36) | 7.4E-01 |
| cg06370528 | <i>BRUNOL4</i>   | chr18 | Body    | 0.95 | (0.71; 1.28) | 7.4E-01 |
| cg15717676 | <i>FBXO31</i>    | chr16 | Body    | 1.05 | (0.77; 1.44) | 7.4E-01 |
| cg15717676 | <i>FBXO31</i>    | chr16 | 5'UTR   | 1.05 | (0.77; 1.44) | 7.4E-01 |
| cg10152633 | <i>PTPRN2</i>    | chr7  | Body    | 1.06 | (0.76; 1.48) | 7.4E-01 |
| cg01310920 | <i>PTPRN2</i>    | chr7  | Body    | 0.95 | (0.71; 1.27) | 7.4E-01 |
| cg08437437 | <i>FBXO36</i>    | chr2  | Body    | 0.95 | (0.69; 1.3)  | 7.4E-01 |
| cg00387117 | <i>ALCAM</i>     | chr3  | Body    | 1.06 | (0.73; 1.55) | 7.4E-01 |
| cg25266621 | <i>AKAP13</i>    | chr15 | Body    | 0.95 | (0.7; 1.28)  | 7.4E-01 |
| cg03338325 | <i>DNAI2</i>     | chr17 | Body    | 0.93 | (0.59; 1.45) | 7.4E-01 |
| cg03307550 | <i>PTPRN2</i>    | chr7  | Body    | 0.94 | (0.67; 1.34) | 7.4E-01 |
| cg03576224 | <i>CDH13</i>     | chr16 | 5'UTR   | 0.95 | (0.72; 1.27) | 7.4E-01 |
| cg03576224 | <i>CDH13</i>     | chr16 | Body    | 0.95 | (0.72; 1.27) | 7.4E-01 |
| cg15980305 | <i>FBXO11</i>    | chr2  | 1stExon | 1.05 | (0.78; 1.42) | 7.4E-01 |
| cg07080147 | <i>UNC80</i>     | chr2  | Body    | 0.95 | (0.67; 1.33) | 7.4E-01 |
| cg09450352 | <i>PTPRN2</i>    | chr7  | Body    | 1.06 | (0.76; 1.46) | 7.5E-01 |
| cg12609140 | <i>PTPRN2</i>    | chr7  | Body    | 1.06 | (0.76; 1.46) | 7.5E-01 |
| cg02865230 | <i>WWOX</i>      | chr16 | Body    | 0.95 | (0.67; 1.33) | 7.5E-01 |
| cg13083012 | <i>AKAP13</i>    | chr15 | 5'UTR   | 1.06 | (0.73; 1.56) | 7.5E-01 |
| cg01088352 | <i>PTPRN2</i>    | chr7  | Body    | 0.95 | (0.69; 1.31) | 7.5E-01 |
| cg02171206 | <i>WWOX</i>      | chr16 | Body    | 1.05 | (0.76; 1.46) | 7.5E-01 |
| cg26075933 | <i>MEIS2</i>     | chr15 | Body    | 1.06 | (0.76; 1.47) | 7.5E-01 |
| cg01838419 | <i>EIF2S1</i>    | chr14 | TSS1500 | 0.95 | (0.68; 1.32) | 7.5E-01 |
| cg08902987 | <i>SUGCT</i>     | chr7  | Body    | 0.93 | (0.61; 1.42) | 7.5E-01 |
| cg15636633 | <i>AKAP3</i>     | chr12 | 5'UTR   | 0.94 | (0.64; 1.38) | 7.5E-01 |
| cg16061099 | <i>BRUNOL4</i>   | chr18 | 3'UTR   | 0.94 | (0.66; 1.35) | 7.5E-01 |
| cg03129600 | <i>NRXN1</i>     | chr2  | 5'UTR   | 0.88 | (0.4; 1.94)  | 7.5E-01 |
| cg19264203 | <i>MTNR1B</i>    | chr11 | Body    | 0.93 | (0.62; 1.42) | 7.5E-01 |
| cg20236013 | <i>UBE2E2</i>    | chr3  | 5'UTR   | 0.95 | (0.68; 1.31) | 7.5E-01 |
| cg09818691 | <i>TNFRSF1B</i>  | chr1  | TSS1500 | 1.06 | (0.75; 1.49) | 7.5E-01 |
| cg24648384 | <i>GNA12</i>     | chr7  | Body    | 1.05 | (0.78; 1.4)  | 7.5E-01 |
| cg20539811 | <i>CTNND2</i>    | chr5  | Body    | 1.05 | (0.77; 1.45) | 7.5E-01 |
| cg13958567 | <i>PTPRN2</i>    | chr7  | Body    | 0.95 | (0.7; 1.29)  | 7.5E-01 |
| cg04939944 | <i>TNRC18</i>    | chr7  | Body    | 0.96 | (0.72; 1.26) | 7.5E-01 |
| cg02433515 | <i>MEIS2</i>     | chr15 | Body    | 1.08 | (0.69; 1.68) | 7.5E-01 |
| cg23831143 | <i>TNFRSF10C</i> | chr8  | TSS200  | 0.95 | (0.68; 1.33) | 7.5E-01 |
| cg06497408 | <i>PTPRN2</i>    | chr7  | Body    | 0.95 | (0.7; 1.29)  | 7.5E-01 |
| cg10473506 | <i>PEX14</i>     | chr1  | Body    | 0.94 | (0.64; 1.37) | 7.5E-01 |
| cg17055895 | <i>CPEB1</i>     | chr15 | Body    | 1.06 | (0.74; 1.53) | 7.5E-01 |
| cg17055895 | <i>CPEB1</i>     | chr15 | 5'UTR   | 1.06 | (0.74; 1.53) | 7.5E-01 |
| cg04426510 | <i>FBXO31</i>    | chr16 | Body    | 0.95 | (0.69; 1.31) | 7.5E-01 |
| cg04426510 | <i>FBXO31</i>    | chr16 | 5'UTR   | 0.95 | (0.69; 1.31) | 7.5E-01 |
| cg15126968 | <i>PTPRN2</i>    | chr7  | Body    | 1.07 | (0.72; 1.58) | 7.5E-01 |
| cg02986924 | <i>RTN4</i>      | chr2  | 3'UTR   | 0.95 | (0.69; 1.31) | 7.5E-01 |
| cg17453840 | <i>CPEB1</i>     | chr15 | TSS1500 | 1.08 | (0.68; 1.72) | 7.5E-01 |
| cg07250036 | <i>CTDSPL2</i>   | chr15 | 5'UTR   | 0.95 | (0.71; 1.29) | 7.5E-01 |
| cg06547959 | <i>BRUNOL4</i>   | chr18 | Body    | 0.91 | (0.52; 1.6)  | 7.5E-01 |
| cg24532476 | <i>CHFR</i>      | chr12 | Body    | 1.07 | (0.7; 1.63)  | 7.5E-01 |
| cg22541509 | <i>PTPRS</i>     | chr19 | Body    | 0.94 | (0.64; 1.38) | 7.5E-01 |
| cg18285788 | <i>PTPRN2</i>    | chr7  | Body    | 0.95 | (0.69; 1.3)  | 7.5E-01 |
| cg24790706 | <i>PTPRN2</i>    | chr7  | Body    | 0.95 | (0.68; 1.32) | 7.5E-01 |
| cg15322801 | <i>ELAVL4</i>    | chr1  | TSS200  | 1.06 | (0.74; 1.51) | 7.5E-01 |
| cg15322801 | <i>ELAVL4</i>    | chr1  | Body    | 1.06 | (0.74; 1.51) | 7.5E-01 |
| cg24743147 | <i>GOLT1B</i>    | chr12 | Body    | 1.05 | (0.76; 1.46) | 7.5E-01 |
| cg24743147 | <i>RECQL</i>     | chr12 | TSS1500 | 1.05 | (0.76; 1.46) | 7.5E-01 |
| cg20293888 | <i>GNA12</i>     | chr7  | Body    | 1.07 | (0.72; 1.59) | 7.5E-01 |



|            |                  |       |         |      |              |         |
|------------|------------------|-------|---------|------|--------------|---------|
| cg06903477 | <i>RTN4RL1</i>   | chr17 | Body    | 0.95 | (0.67; 1.34) | 7.5E-01 |
| cg18588247 | <i>ATP8A1</i>    | chr4  | Body    | 1.07 | (0.7; 1.65)  | 7.5E-01 |
| cg19081259 | <i>CSMD2</i>     | chr1  | ExonBnd | 0.95 | (0.67; 1.33) | 7.5E-01 |
| cg19081259 | <i>CSMD2</i>     | chr1  | Body    | 0.95 | (0.67; 1.33) | 7.5E-01 |
| cg13599258 | <i>CUX2</i>      | chr12 | Body    | 1.06 | (0.74; 1.52) | 7.5E-01 |
| cg18274984 | <i>PEX14</i>     | chr1  | Body    | 1.06 | (0.76; 1.47) | 7.5E-01 |
| cg16617510 | <i>TNFRSF1A</i>  | chr12 | 3'UTR   | 1.05 | (0.77; 1.43) | 7.5E-01 |
| cg15909077 | <i>ATF7</i>      | chr12 | ExonBnd | 0.95 | (0.67; 1.33) | 7.5E-01 |
| cg15909077 | <i>ATF7</i>      | chr12 | Body    | 0.95 | (0.67; 1.33) | 7.5E-01 |
| cg15087571 | <i>TNRC18</i>    | chr7  | 5'UTR   | 0.94 | (0.64; 1.38) | 7.5E-01 |
| cg03129964 | <i>BARX1</i>     | chr9  | Body    | 1.05 | (0.77; 1.43) | 7.5E-01 |
| cg21016956 | <i>NOL4</i>      | chr18 | Body    | 0.95 | (0.67; 1.34) | 7.5E-01 |
| cg08021815 | <i>RECQL</i>     | chr12 | Body    | 0.93 | (0.61; 1.43) | 7.5E-01 |
| cg11263042 | <i>PEX14</i>     | chr1  | 1stExon | 1.05 | (0.79; 1.39) | 7.5E-01 |
| cg02979325 | <i>CUX2</i>      | chr12 | Body    | 1.06 | (0.73; 1.56) | 7.5E-01 |
| cg10638660 | <i>MTCL1</i>     | chr18 | TSS200  | 0.94 | (0.64; 1.38) | 7.5E-01 |
| cg23740067 | <i>FBXO11</i>    | chr2  | ExonBnd | 0.94 | (0.63; 1.39) | 7.5E-01 |
| cg23740067 | <i>FBXO11</i>    | chr2  | Body    | 0.94 | (0.63; 1.39) | 7.5E-01 |
| cg06209210 | <i>TNFRSF12A</i> | chr16 | Body    | 0.94 | (0.66; 1.35) | 7.5E-01 |
| cg02515738 | <i>CNTNAP2</i>   | chr7  | Body    | 0.94 | (0.66; 1.35) | 7.5E-01 |
| cg06631771 | <i>POU2F1</i>    | chr1  | Body    | 1.05 | (0.76; 1.46) | 7.5E-01 |
| cg09280663 | <i>CTNND2</i>    | chr5  | Body    | 0.93 | (0.59; 1.46) | 7.5E-01 |
| cg09280663 | <i>CTNND2</i>    | chr5  | 5'UTR   | 0.93 | (0.59; 1.46) | 7.5E-01 |
| cg23101138 | <i>DACH1</i>     | chr13 | Body    | 0.94 | (0.64; 1.37) | 7.5E-01 |
| cg10644073 | <i>AKAP13</i>    | chr15 | 5'UTR   | 0.95 | (0.69; 1.31) | 7.5E-01 |
| cg21454760 | <i>ARID1A</i>    | chr1  | Body    | 0.93 | (0.59; 1.47) | 7.5E-01 |
| cg09312399 | <i>FBXO38</i>    | chr5  | TSS1500 | 1.06 | (0.73; 1.55) | 7.5E-01 |
| cg01645929 | <i>CTDSP2</i>    | chr12 | Body    | 0.95 | (0.71; 1.28) | 7.5E-01 |
| cg18842704 | <i>TNRC6B</i>    | chr22 | Body    | 1.05 | (0.77; 1.42) | 7.5E-01 |
| cg07177001 | <i>TNFRSF10B</i> | chr8  | Body    | 0.95 | (0.69; 1.31) | 7.5E-01 |
| cg07177001 | <i>TNFRSF10B</i> | chr8  | 5'UTR   | 0.95 | (0.69; 1.31) | 7.5E-01 |
| cg07177001 | <i>TNFRSF10B</i> | chr8  | 1stExon | 0.95 | (0.69; 1.31) | 7.5E-01 |
| cg02860921 | <i>PTPRN2</i>    | chr7  | Body    | 1.04 | (0.79; 1.37) | 7.5E-01 |
| cg00411413 | <i>CDH13</i>     | chr16 | Body    | 0.95 | (0.71; 1.28) | 7.5E-01 |
| cg01953796 | <i>TAOK3</i>     | chr12 | Body    | 0.95 | (0.68; 1.32) | 7.5E-01 |
| cg12242949 | <i>FBXO34</i>    | chr14 | 5'UTR   | 0.93 | (0.59; 1.47) | 7.5E-01 |
| cg09404381 | <i>WAC</i>       | chr10 | Body    | 1.06 | (0.74; 1.52) | 7.5E-01 |
| cg09814468 | <i>CTNND2</i>    | chr5  | Body    | 1.06 | (0.72; 1.57) | 7.5E-01 |
| cg12622096 | <i>UNC80</i>     | chr2  | Body    | 1.05 | (0.78; 1.41) | 7.6E-01 |
| cg14910646 | <i>NDUFA9</i>    | chr12 | 3'UTR   | 0.95 | (0.7; 1.3)   | 7.6E-01 |
| cg14624444 | <i>PHACTR1</i>   | chr6  | Body    | 0.94 | (0.65; 1.37) | 7.6E-01 |
| cg05690580 | <i>PTPRN2</i>    | chr7  | Body    | 1.05 | (0.77; 1.43) | 7.6E-01 |
| cg26358968 | <i>AKAP13</i>    | chr15 | Body    | 1.05 | (0.76; 1.46) | 7.6E-01 |
| cg27011848 | <i>NRXN1</i>     | chr2  | ExonBnd | 0.93 | (0.6; 1.45)  | 7.6E-01 |
| cg27011848 | <i>NRXN1</i>     | chr2  | Body    | 0.93 | (0.6; 1.45)  | 7.6E-01 |
| cg08157569 | <i>COL1A2</i>    | chr7  | Body    | 0.93 | (0.57; 1.51) | 7.6E-01 |
| cg05693307 | <i>CEP350</i>    | chr1  | Body    | 0.94 | (0.64; 1.39) | 7.6E-01 |
| cg11848928 | <i>PTPRN2</i>    | chr7  | Body    | 1.05 | (0.76; 1.46) | 7.6E-01 |
| cg03459839 | <i>GNA12</i>     | chr7  | Body    | 1.05 | (0.78; 1.4)  | 7.6E-01 |
| cg03459839 | <i>GNA12</i>     | chr7  | TSS200  | 1.05 | (0.78; 1.4)  | 7.6E-01 |
| cg23177406 | <i>PHACTR1</i>   | chr6  | Body    | 0.93 | (0.58; 1.49) | 7.6E-01 |
| cg13108098 | <i>CDH13</i>     | chr16 | 5'UTR   | 1.07 | (0.7; 1.63)  | 7.6E-01 |
| cg13108098 | <i>CDH13</i>     | chr16 | Body    | 1.07 | (0.7; 1.63)  | 7.6E-01 |
| cg19237063 | <i>PTPRN2</i>    | chr7  | Body    | 1.06 | (0.73; 1.55) | 7.6E-01 |
| cg14384510 | <i>PTPRN2</i>    | chr7  | Body    | 0.95 | (0.7; 1.29)  | 7.6E-01 |
| cg15661483 | <i>CTDSPL</i>    | chr3  | Body    | 0.95 | (0.66; 1.35) | 7.6E-01 |
| cg15791369 | <i>ATF7IP</i>    | chr12 | TSS1500 | 1.06 | (0.73; 1.55) | 7.6E-01 |
| cg01217514 | <i>CHFR</i>      | chr12 | Body    | 0.94 | (0.63; 1.39) | 7.6E-01 |
| cg14940779 | <i>ERI3</i>      | chr1  | Body    | 1.05 | (0.76; 1.46) | 7.6E-01 |
| cg26740375 | <i>DMXL2</i>     | chr15 | Body    | 0.93 | (0.6; 1.45)  | 7.6E-01 |
| cg27390443 | <i>CREBBP</i>    | chr16 | Body    | 1.05 | (0.75; 1.47) | 7.6E-01 |



|            |                     |       |         |      |              |         |
|------------|---------------------|-------|---------|------|--------------|---------|
| cg15573998 | <i>NRXN1</i>        | chr2  | Body    | 1.05 | (0.75; 1.48) | 7.6E-01 |
| cg03073636 | <i>ATF7IP</i>       | chr12 | 5'UTR   | 1.05 | (0.77; 1.44) | 7.6E-01 |
| cg03073636 | <i>ATF7IP</i>       | chr12 | Body    | 1.05 | (0.77; 1.44) | 7.6E-01 |
| cg20535781 | <i>CHFR</i>         | chr12 | TSS1500 | 1.06 | (0.73; 1.55) | 7.6E-01 |
| cg23630423 | <i>RTN4RL1</i>      | chr17 | Body    | 1.06 | (0.73; 1.54) | 7.6E-01 |
| cg16668176 | <i>PTPRS</i>        | chr19 | 5'UTR   | 1.06 | (0.74; 1.5)  | 7.6E-01 |
| cg24956366 | <i>UBE2E2</i>       | chr3  | Body    | 0.93 | (0.61; 1.44) | 7.6E-01 |
| cg17960347 | <i>CACNA1C</i>      | chr12 | Body    | 1.05 | (0.77; 1.44) | 7.6E-01 |
| cg08353078 | <i>TNFRSF11A</i>    | chr18 | Body    | 1.05 | (0.78; 1.42) | 7.6E-01 |
| cg18660891 | <i>ZBTB20</i>       | chr3  | TSS1500 | 1.06 | (0.75; 1.49) | 7.6E-01 |
| cg07300558 | <i>BRUNOL4</i>      | chr18 | 1stExon | 0.93 | (0.57; 1.5)  | 7.6E-01 |
| cg26709234 | <i>CDH13</i>        | chr16 | Body    | 1.06 | (0.74; 1.51) | 7.6E-01 |
| cg02495045 | <i>MBD5</i>         | chr2  | 5'UTR   | 1.05 | (0.75; 1.48) | 7.6E-01 |
| cg26295921 | <i>PTPRN2</i>       | chr7  | Body    | 1.06 | (0.74; 1.52) | 7.6E-01 |
| cg12983704 | <i>FBXO36</i>       | chr2  | Body    | 1.05 | (0.78; 1.42) | 7.6E-01 |
| cg11631450 | <i>TENM2</i>        | chr5  | Body    | 0.95 | (0.71; 1.29) | 7.6E-01 |
| cg21858772 | <i>WWOX</i>         | chr16 | Body    | 1.06 | (0.73; 1.53) | 7.6E-01 |
| cg25700789 | <i>GNA12</i>        | chr7  | Body    | 0.95 | (0.69; 1.31) | 7.6E-01 |
| cg25700789 | <i>GNA12</i>        | chr7  | TSS1500 | 0.95 | (0.69; 1.31) | 7.6E-01 |
| cg14017942 | <i>TSHZ3</i>        | chr19 | 3'UTR   | 1.06 | (0.73; 1.53) | 7.6E-01 |
| cg17207772 | <i>AKAP13</i>       | chr15 | Body    | 0.93 | (0.58; 1.48) | 7.6E-01 |
| cg14275148 | <i>FBXO11</i>       | chr2  | Body    | 1.06 | (0.71; 1.6)  | 7.6E-01 |
| cg03845289 | <i>BARX2</i>        | chr11 | TSS200  | 0.94 | (0.61; 1.44) | 7.6E-01 |
| cg00656990 | <i>WWOX</i>         | chr16 | Body    | 0.92 | (0.55; 1.54) | 7.6E-01 |
| cg11131810 | <i>PHACTR1</i>      | chr6  | Body    | 0.94 | (0.63; 1.41) | 7.6E-01 |
| cg04100532 | <i>UNC80</i>        | chr2  | TSS200  | 0.93 | (0.58; 1.5)  | 7.6E-01 |
| cg24736886 | <i>DACH1</i>        | chr13 | Body    | 1.06 | (0.74; 1.5)  | 7.6E-01 |
| cg14994242 | <i>PTPRN2</i>       | chr7  | Body    | 1.05 | (0.75; 1.48) | 7.6E-01 |
| cg00322486 | <i>ELAVL4</i>       | chr1  | Body    | 1.05 | (0.76; 1.45) | 7.6E-01 |
| cg16001682 | <i>SGIP1</i>        | chr1  | TSS1500 | 0.95 | (0.66; 1.36) | 7.6E-01 |
| cg20668834 | <i>NRXN1</i>        | chr2  | Body    | 1.06 | (0.73; 1.53) | 7.6E-01 |
| cg00716277 | <i>PTPRN2</i>       | chr7  | Body    | 1.05 | (0.75; 1.49) | 7.6E-01 |
| cg21006600 | <i>CACNA1C</i>      | chr12 | Body    | 0.95 | (0.66; 1.36) | 7.6E-01 |
| cg01021552 | <i>CDH11</i>        | chr16 | 5'UTR   | 0.95 | (0.67; 1.34) | 7.6E-01 |
| cg19009220 | <i>GOLT1B</i>       | chr12 | TSS1500 | 0.95 | (0.68; 1.32) | 7.6E-01 |
| cg19009220 | <i>RECQL</i>        | chr12 | 5'UTR   | 0.95 | (0.68; 1.32) | 7.6E-01 |
| cg12189962 | <i>LOC101929698</i> | chr20 | Body    | 1.1  | (0.6; 2.02)  | 7.6E-01 |
| cg12189962 | <i>NOL4L</i>        | chr20 | Body    | 1.1  | (0.6; 2.02)  | 7.6E-01 |
| cg06701627 | <i>PTPRS</i>        | chr19 | Body    | 1.05 | (0.76; 1.45) | 7.6E-01 |
| cg15318176 | <i>PTPRN2</i>       | chr7  | Body    | 0.94 | (0.62; 1.41) | 7.6E-01 |
| cg23654019 | <i>CUX2</i>         | chr12 | Body    | 1.05 | (0.77; 1.42) | 7.6E-01 |
| cg10756618 | <i>CHCHD6</i>       | chr3  | Body    | 0.9  | (0.45; 1.79) | 7.6E-01 |
| cg08339915 | <i>PTPRN2</i>       | chr7  | Body    | 1.07 | (0.7; 1.63)  | 7.6E-01 |
| cg26295618 | <i>CEP350</i>       | chr1  | 3'UTR   | 1.05 | (0.77; 1.44) | 7.6E-01 |
| cg08385422 | <i>ACVR2A</i>       | chr2  | TSS1500 | 1.05 | (0.75; 1.48) | 7.6E-01 |
| cg08385422 | <i>ACVR2A</i>       | chr2  | TSS200  | 1.05 | (0.75; 1.48) | 7.6E-01 |
| cg03301831 | <i>RTN4</i>         | chr2  | Body    | 1.05 | (0.78; 1.41) | 7.6E-01 |
| cg18545076 | <i>TNFRSF10C</i>    | chr8  | TSS1500 | 0.88 | (0.39; 2)    | 7.6E-01 |
| cg12565261 | <i>WAC</i>          | chr10 | Body    | 1.08 | (0.67; 1.72) | 7.6E-01 |
| cg14438755 | <i>RNU5E-1</i>      | chr5  | Body    | 0.95 | (0.69; 1.31) | 7.6E-01 |
| cg04862197 | <i>PTPRN2</i>       | chr7  | 1stExon | 0.95 | (0.67; 1.34) | 7.6E-01 |
| cg04862197 | <i>PTPRN2</i>       | chr7  | Body    | 0.95 | (0.67; 1.34) | 7.6E-01 |
| cg04862197 | <i>PTPRN2</i>       | chr7  | 5'UTR   | 0.95 | (0.67; 1.34) | 7.6E-01 |
| cg17790241 | <i>TNFRSF10C</i>    | chr8  | TSS200  | 0.95 | (0.66; 1.35) | 7.6E-01 |
| cg11328270 | <i>RTN4</i>         | chr2  | Body    | 0.95 | (0.66; 1.35) | 7.6E-01 |
| cg22606703 | <i>MEIS2</i>        | chr15 | Body    | 0.95 | (0.66; 1.36) | 7.6E-01 |
| cg27427207 | <i>ATP8A1</i>       | chr4  | Body    | 0.96 | (0.72; 1.28) | 7.6E-01 |
| cg04044684 | <i>CHFR</i>         | chr12 | TSS1500 | 1.05 | (0.76; 1.46) | 7.6E-01 |
| cg13171761 | <i>CACNA1C</i>      | chr12 | Body    | 1.05 | (0.75; 1.48) | 7.6E-01 |
| cg25699925 | <i>CDH13</i>        | chr16 | 5'UTR   | 1.05 | (0.75; 1.47) | 7.7E-01 |
| cg25699925 | <i>CDH13</i>        | chr16 | Body    | 1.05 | (0.75; 1.47) | 7.7E-01 |



|            |                 |       |         |      |              |         |
|------------|-----------------|-------|---------|------|--------------|---------|
| cg07575501 | <i>CUX2</i>     | chr12 | Body    | 0.95 | (0.7; 1.3)   | 7.7E-01 |
| cg24051202 | <i>TNR</i>      | chr1  | 5'UTR   | 0.93 | (0.59; 1.48) | 7.7E-01 |
| cg11856697 | <i>DNAI2</i>    | chr17 | 5'UTR   | 1.05 | (0.77; 1.42) | 7.7E-01 |
| cg00807462 | <i>CUX2</i>     | chr12 | Body    | 0.94 | (0.65; 1.38) | 7.7E-01 |
| cg12446209 | <i>NRXN1</i>    | chr2  | Body    | 0.94 | (0.65; 1.38) | 7.7E-01 |
| cg18286894 | <i>PTPRN2</i>   | chr7  | Body    | 1.09 | (0.61; 1.95) | 7.7E-01 |
| cg19112158 | <i>POU2F1</i>   | chr1  | 3'UTR   | 1.06 | (0.73; 1.53) | 7.7E-01 |
| cg19112158 | <i>POU2F1</i>   | chr1  | Body    | 1.06 | (0.73; 1.53) | 7.7E-01 |
| cg15442907 | <i>CACNA1C</i>  | chr12 | 3'UTR   | 0.95 | (0.7; 1.3)   | 7.7E-01 |
| cg03054819 | <i>PTPRN2</i>   | chr7  | Body    | 1.07 | (0.7; 1.64)  | 7.7E-01 |
| cg08150843 | <i>PTPRS</i>    | chr19 | Body    | 1.06 | (0.71; 1.6)  | 7.7E-01 |
| cg00947599 | <i>GNA12</i>    | chr7  | Body    | 0.95 | (0.7; 1.3)   | 7.7E-01 |
| cg18769909 | <i>PTPRN2</i>   | chr7  | Body    | 0.95 | (0.69; 1.32) | 7.7E-01 |
| cg26942275 | <i>COL1A2</i>   | chr7  | TSS200  | 0.94 | (0.65; 1.38) | 7.7E-01 |
| cg25842602 | <i>BRUNOL4</i>  | chr18 | TSS200  | 1.06 | (0.74; 1.51) | 7.7E-01 |
| cg14584961 | <i>PTPRN2</i>   | chr7  | Body    | 1.06 | (0.71; 1.6)  | 7.7E-01 |
| cg04995537 | <i>SCAF8</i>    | chr6  | Body    | 0.94 | (0.64; 1.39) | 7.7E-01 |
| cg08014150 | <i>NOL4L</i>    | chr20 | Body    | 1.06 | (0.72; 1.57) | 7.7E-01 |
| cg08837200 | <i>PTPRN2</i>   | chr7  | Body    | 1.06 | (0.72; 1.56) | 7.7E-01 |
| cg20729586 | <i>CDH13</i>    | chr16 | Body    | 1.04 | (0.78; 1.4)  | 7.7E-01 |
| cg05852523 | <i>CDH13</i>    | chr16 | TSS1500 | 0.95 | (0.66; 1.36) | 7.7E-01 |
| cg23660064 | <i>SUSD4</i>    | chr1  | 3'UTR   | 0.95 | (0.67; 1.34) | 7.7E-01 |
| cg12884814 | <i>NRXN1</i>    | chr2  | Body    | 0.95 | (0.65; 1.37) | 7.7E-01 |
| cg15283737 | <i>CUX2</i>     | chr12 | Body    | 0.93 | (0.59; 1.47) | 7.7E-01 |
| cg08359717 | <i>ZBTB20</i>   | chr3  | 5'UTR   | 1.06 | (0.73; 1.55) | 7.7E-01 |
| cg01958086 | <i>MEIS2</i>    | chr15 | Body    | 0.95 | (0.67; 1.35) | 7.7E-01 |
| cg13566648 | <i>PHACTR1</i>  | chr6  | Body    | 0.93 | (0.55; 1.55) | 7.7E-01 |
| cg03916382 | <i>PTPRN2</i>   | chr7  | Body    | 1.05 | (0.75; 1.48) | 7.7E-01 |
| cg24305127 | <i>PTPRN2</i>   | chr7  | Body    | 0.95 | (0.7; 1.3)   | 7.7E-01 |
| cg07455496 | <i>ZNF704</i>   | chr8  | Body    | 1.06 | (0.72; 1.57) | 7.7E-01 |
| cg22960901 | <i>PTPRN2</i>   | chr7  | Body    | 0.95 | (0.7; 1.3)   | 7.7E-01 |
| cg02290623 | <i>PDE8A</i>    | chr15 | 5'UTR   | 0.94 | (0.64; 1.38) | 7.7E-01 |
| cg02290623 | <i>PDE8A</i>    | chr15 | Body    | 0.94 | (0.64; 1.38) | 7.7E-01 |
| cg03262885 | <i>PTPRN2</i>   | chr7  | Body    | 1.05 | (0.75; 1.48) | 7.7E-01 |
| cg04569831 | <i>CNTNAP2</i>  | chr7  | Body    | 0.96 | (0.71; 1.29) | 7.7E-01 |
| cg04912993 | <i>ALCAM</i>    | chr3  | Body    | 0.88 | (0.38; 2.06) | 7.7E-01 |
| cg05506292 | <i>AKAP13</i>   | chr15 | 5'UTR   | 1.06 | (0.73; 1.54) | 7.7E-01 |
| cg04236980 | <i>FBXO34</i>   | chr14 | 5'UTR   | 0.9  | (0.45; 1.79) | 7.7E-01 |
| cg13689169 | <i>WVOX</i>     | chr16 | Body    | 0.95 | (0.7; 1.3)   | 7.7E-01 |
| cg07680649 | <i>ZNF704</i>   | chr8  | 5'UTR   | 1.05 | (0.76; 1.46) | 7.7E-01 |
| cg08502856 | <i>PDE8A</i>    | chr15 | TSS200  | 0.96 | (0.71; 1.29) | 7.7E-01 |
| cg08502856 | <i>PDE8A</i>    | chr15 | TSS1500 | 0.96 | (0.71; 1.29) | 7.7E-01 |
| cg18993254 | <i>ARID1A</i>   | chr1  | Body    | 0.95 | (0.68; 1.33) | 7.7E-01 |
| cg26233866 | <i>ERI3</i>     | chr1  | Body    | 1.05 | (0.76; 1.44) | 7.7E-01 |
| cg12197062 | <i>ZBTB20</i>   | chr3  | Body    | 1.05 | (0.75; 1.47) | 7.7E-01 |
| cg12197062 | <i>ZBTB20</i>   | chr3  | 5'UTR   | 1.05 | (0.75; 1.47) | 7.7E-01 |
| cg07617764 | <i>CTDSP2</i>   | chr12 | Body    | 1.05 | (0.74; 1.49) | 7.7E-01 |
| cg12297652 | <i>SCAF8</i>    | chr6  | 1stExon | 1.05 | (0.76; 1.46) | 7.7E-01 |
| cg12297652 | <i>SCAF8</i>    | chr6  | Body    | 1.05 | (0.76; 1.46) | 7.7E-01 |
| cg12297652 | <i>SCAF8</i>    | chr6  | 5'UTR   | 1.05 | (0.76; 1.46) | 7.7E-01 |
| cg03937180 | <i>POU2F1</i>   | chr1  | Body    | 1.06 | (0.72; 1.56) | 7.7E-01 |
| cg03937180 | <i>POU2F1</i>   | chr1  | TSS1500 | 1.06 | (0.72; 1.56) | 7.7E-01 |
| cg24002388 | <i>DDHD2</i>    | chr8  | TSS1500 | 0.95 | (0.68; 1.34) | 7.7E-01 |
| cg20223687 | <i>PTPRN2</i>   | chr7  | Body    | 1.05 | (0.74; 1.49) | 7.7E-01 |
| cg15086994 | <i>CHCHD6</i>   | chr3  | Body    | 0.94 | (0.63; 1.42) | 7.7E-01 |
| cg26947721 | <i>PTPRS</i>    | chr19 | 5'UTR   | 0.96 | (0.71; 1.28) | 7.7E-01 |
| cg00087420 | <i>CSMD2</i>    | chr1  | Body    | 1.05 | (0.75; 1.46) | 7.7E-01 |
| cg23601521 | <i>NRXN1</i>    | chr2  | Body    | 0.95 | (0.66; 1.37) | 7.7E-01 |
| cg20851802 | <i>MTNR1A</i>   | chr4  | TSS1500 | 1.05 | (0.77; 1.43) | 7.7E-01 |
| cg02734463 | <i>AKAP13</i>   | chr15 | 3'UTR   | 0.95 | (0.67; 1.35) | 7.7E-01 |
| cg10594075 | <i>TNFRSF19</i> | chr13 | 5'UTR   | 1.08 | (0.66; 1.76) | 7.7E-01 |



|            |              |       |         |      |              |         |
|------------|--------------|-------|---------|------|--------------|---------|
| cg09798977 | NDUFA9       | chr12 | Body    | 1.05 | (0.74; 1.51) | 7.7E-01 |
| cg14030258 | PTPRU        | chr1  | Body    | 0.94 | (0.64; 1.4)  | 7.7E-01 |
| cg11060349 | PTPRN2       | chr7  | Body    | 1.06 | (0.72; 1.55) | 7.7E-01 |
| cg08955548 | PTPRN2       | chr7  | Body    | 0.96 | (0.72; 1.27) | 7.7E-01 |
| cg01557260 | RTN4RL2      | chr11 | Body    | 0.92 | (0.51; 1.64) | 7.7E-01 |
| cg16937126 | DDHD2        | chr8  | TSS1500 | 0.95 | (0.67; 1.34) | 7.7E-01 |
| cg16937126 | DDHD2        | chr8  | TSS200  | 0.95 | (0.67; 1.34) | 7.7E-01 |
| cg24948079 | RTN4RL1      | chr17 | Body    | 1.05 | (0.75; 1.47) | 7.7E-01 |
| cg23361114 | PTPRN2       | chr7  | Body    | 1.1  | (0.58; 2.1)  | 7.7E-01 |
| cg18173450 | WVOX         | chr16 | Body    | 0.95 | (0.69; 1.32) | 7.7E-01 |
| cg14253924 | GNA12        | chr7  | Body    | 0.95 | (0.69; 1.32) | 7.7E-01 |
| cg03118674 | ACVR2A       | chr2  | 3'UTR   | 1.06 | (0.73; 1.53) | 7.7E-01 |
| cg22090098 | NDUFA9       | chr12 | ExonBnd | 0.96 | (0.7; 1.3)   | 7.7E-01 |
| cg22090098 | NDUFA9       | chr12 | Body    | 0.96 | (0.7; 1.3)   | 7.7E-01 |
| cg06018853 | PTPRN2       | chr7  | Body    | 0.96 | (0.71; 1.29) | 7.7E-01 |
| cg15526535 | TNFRSF1B     | chr1  | Body    | 1.12 | (0.51; 2.45) | 7.7E-01 |
| cg04770900 | CUX2         | chr12 | Body    | 0.95 | (0.66; 1.36) | 7.7E-01 |
| cg19882179 | CPEB1        | chr15 | Body    | 1.06 | (0.71; 1.59) | 7.7E-01 |
| cg19882179 | CPEB1        | chr15 | TSS1500 | 1.06 | (0.71; 1.59) | 7.7E-01 |
| cg19882179 | CPEB1        | chr15 | 5'UTR   | 1.06 | (0.71; 1.59) | 7.7E-01 |
| cg09779902 | AKAP13       | chr15 | Body    | 1.05 | (0.74; 1.51) | 7.7E-01 |
| cg11345955 | AKAP13       | chr15 | Body    | 0.96 | (0.7; 1.3)   | 7.7E-01 |
| cg23702727 | LOC100130933 | chr17 | TSS200  | 1.1  | (0.57; 2.14) | 7.7E-01 |
| cg23702727 | RECQL5       | chr17 | Body    | 1.1  | (0.57; 2.14) | 7.7E-01 |
| cg02664515 | DMXL2        | chr15 | Body    | 0.91 | (0.48; 1.73) | 7.7E-01 |
| cg02842711 | FSTL1        | chr3  | Body    | 1.05 | (0.76; 1.44) | 7.7E-01 |
| cg04809093 | ZBTB20       | chr3  | 5'UTR   | 0.95 | (0.66; 1.36) | 7.7E-01 |
| cg22928999 | FBXO11       | chr2  | Body    | 1.06 | (0.72; 1.54) | 7.7E-01 |
| cg13374432 | AKAP13       | chr15 | Body    | 0.89 | (0.39; 2)    | 7.7E-01 |
| cg04545268 | PTPRN2       | chr7  | Body    | 0.94 | (0.62; 1.43) | 7.7E-01 |
| cg27510667 | CTDSPL2      | chr15 | 5'UTR   | 1.05 | (0.75; 1.46) | 7.7E-01 |
| cg23112745 | PTPRN2       | chr7  | Body    | 1.05 | (0.75; 1.47) | 7.7E-01 |
| cg07121340 | CACNA1C      | chr12 | Body    | 1.05 | (0.76; 1.43) | 7.8E-01 |
| cg02184609 | GNA12        | chr7  | Body    | 0.94 | (0.64; 1.4)  | 7.8E-01 |
| cg02753722 | CDH13        | chr16 | 5'UTR   | 1.05 | (0.76; 1.45) | 7.8E-01 |
| cg02753722 | CDH13        | chr16 | Body    | 1.05 | (0.76; 1.45) | 7.8E-01 |
| cg26967186 | PTPRN2       | chr7  | Body    | 1.04 | (0.78; 1.4)  | 7.8E-01 |
| cg00920348 | SGIP1        | chr1  | TSS1500 | 1.05 | (0.76; 1.45) | 7.8E-01 |
| cg14628799 | NOL4L        | chr20 | Body    | 0.94 | (0.62; 1.43) | 7.8E-01 |
| cg08309809 | TNFRSF10C    | chr8  | 5'UTR   | 1.05 | (0.74; 1.5)  | 7.8E-01 |
| cg08309809 | TNFRSF10C    | chr8  | 1stExon | 1.05 | (0.74; 1.5)  | 7.8E-01 |
| cg20393882 | PTPRN2       | chr7  | Body    | 0.95 | (0.67; 1.34) | 7.8E-01 |
| cg11687389 | PHACTR1      | chr6  | Body    | 1.05 | (0.75; 1.46) | 7.8E-01 |
| cg14292869 | PTPRN2       | chr7  | Body    | 0.96 | (0.71; 1.3)  | 7.8E-01 |
| cg11626052 | PTPRN2       | chr7  | Body    | 0.96 | (0.7; 1.31)  | 7.8E-01 |
| cg05484687 | CTNND2       | chr5  | Body    | 0.95 | (0.69; 1.32) | 7.8E-01 |
| cg22588445 | PTPRN2       | chr7  | Body    | 1.04 | (0.79; 1.38) | 7.8E-01 |
| cg04644049 | PTPRN2       | chr7  | Body    | 0.96 | (0.7; 1.3)   | 7.8E-01 |
| cg16028599 | TNRC18       | chr7  | Body    | 0.96 | (0.71; 1.29) | 7.8E-01 |
| cg11951808 | CEP350       | chr1  | Body    | 0.95 | (0.68; 1.34) | 7.8E-01 |
| cg15010714 | CDH11        | chr16 | TSS1500 | 0.93 | (0.54; 1.58) | 7.8E-01 |
| cg22364158 | TNRC6B       | chr22 | 5'UTR   | 0.95 | (0.67; 1.34) | 7.8E-01 |
| cg21458032 | CDH13        | chr16 | Body    | 1.04 | (0.78; 1.39) | 7.8E-01 |
| cg08041408 | PTPRN2       | chr7  | Body    | 1.05 | (0.75; 1.48) | 7.8E-01 |
| cg19717061 | ZBTB20       | chr3  | 5'UTR   | 0.95 | (0.66; 1.37) | 7.8E-01 |
| cg03435201 | AKAP13       | chr15 | Body    | 1.05 | (0.75; 1.47) | 7.8E-01 |
| cg02609551 | FBXO31       | chr16 | Body    | 1.06 | (0.72; 1.55) | 7.8E-01 |
| cg04260737 | RTN4         | chr2  | TSS1500 | 0.96 | (0.7; 1.31)  | 7.8E-01 |
| cg04260737 | RTN4         | chr2  | Body    | 0.96 | (0.7; 1.31)  | 7.8E-01 |
| cg13213165 | SGIP1        | chr1  | Body    | 0.95 | (0.66; 1.37) | 7.8E-01 |
| cg13192695 | MTNR1A       | chr4  | Body    | 0.95 | (0.69; 1.32) | 7.8E-01 |



|            |                 |       |         |      |              |         |
|------------|-----------------|-------|---------|------|--------------|---------|
| cg08631397 | <i>CDH13</i>    | chr16 | Body    | 0.95 | (0.68; 1.33) | 7.8E-01 |
| cg00878240 | <i>PTPRN2</i>   | chr7  | Body    | 1.05 | (0.75; 1.47) | 7.8E-01 |
| cg08462941 | <i>PTPRS</i>    | chr19 | 5'UTR   | 1.08 | (0.64; 1.8)  | 7.8E-01 |
| cg06318274 | <i>AKAP13</i>   | chr15 | Body    | 0.96 | (0.72; 1.28) | 7.8E-01 |
| cg17559206 | <i>CREBBP</i>   | chr16 | Body    | 0.96 | (0.7; 1.31)  | 7.8E-01 |
| cg22508831 | <i>TNRC6B</i>   | chr22 | Body    | 0.94 | (0.63; 1.42) | 7.8E-01 |
| cg22508831 | <i>TNRC6B</i>   | chr22 | TSS1500 | 0.94 | (0.63; 1.42) | 7.8E-01 |
| cg03146394 | <i>TNFRSF1B</i> | chr1  | Body    | 1.05 | (0.76; 1.43) | 7.8E-01 |
| cg05329915 | <i>MTNR1A</i>   | chr4  | Body    | 0.96 | (0.7; 1.31)  | 7.8E-01 |
| cg05001009 | <i>NRXN1</i>    | chr2  | 5'UTR   | 1.05 | (0.73; 1.52) | 7.8E-01 |
| cg05001009 | <i>NRXN1</i>    | chr2  | 1stExon | 1.05 | (0.73; 1.52) | 7.8E-01 |
| cg13451497 | <i>PTPRN2</i>   | chr7  | Body    | 1.06 | (0.69; 1.63) | 7.8E-01 |
| cg15288845 | <i>UBE2E2</i>   | chr3  | Body    | 0.95 | (0.65; 1.39) | 7.8E-01 |
| cg01049293 | <i>GNA12</i>    | chr7  | Body    | 0.95 | (0.67; 1.34) | 7.8E-01 |
| cg04371321 | <i>SUGCT</i>    | chr7  | Body    | 0.94 | (0.58; 1.5)  | 7.8E-01 |
| cg15754829 | <i>TAOK3</i>    | chr12 | Body    | 1.05 | (0.76; 1.45) | 7.8E-01 |
| cg00937012 | <i>CPEB1</i>    | chr15 | Body    | 1.06 | (0.69; 1.63) | 7.8E-01 |
| cg00937012 | <i>CPEB1</i>    | chr15 | TSS1500 | 1.06 | (0.69; 1.63) | 7.8E-01 |
| cg08901057 | <i>PTPRS</i>    | chr19 | Body    | 1.05 | (0.74; 1.49) | 7.8E-01 |
| cg04085808 | <i>PTPRN2</i>   | chr7  | Body    | 0.96 | (0.72; 1.28) | 7.8E-01 |
| cg11362604 | <i>MEIS2</i>    | chr15 | Body    | 1.04 | (0.77; 1.42) | 7.8E-01 |
| cg15903887 | <i>FBXO36</i>   | chr2  | TSS200  | 0.95 | (0.68; 1.34) | 7.8E-01 |
| cg09362578 | <i>GNA12</i>    | chr7  | Body    | 1.05 | (0.75; 1.47) | 7.8E-01 |
| cg04264072 | <i>CACNA1C</i>  | chr12 | Body    | 0.94 | (0.61; 1.45) | 7.8E-01 |
| cg04158891 | <i>PTPRN2</i>   | chr7  | Body    | 0.96 | (0.74; 1.26) | 7.8E-01 |
| cg10919889 | <i>NRXN1</i>    | chr2  | Body    | 1.05 | (0.74; 1.49) | 7.8E-01 |
| cg24406898 | <i>COL1A2</i>   | chr7  | TSS1500 | 1.04 | (0.78; 1.38) | 7.8E-01 |
| cg16743752 | <i>NRXN1</i>    | chr2  | Body    | 1.06 | (0.71; 1.58) | 7.8E-01 |
| cg04150777 | <i>SUGCT</i>    | chr7  | Body    | 0.92 | (0.52; 1.64) | 7.8E-01 |
| cg03039399 | <i>CREBBP</i>   | chr16 | TSS1500 | 1.05 | (0.76; 1.44) | 7.8E-01 |
| cg12529212 | <i>CPEB1</i>    | chr15 | Body    | 0.94 | (0.59; 1.48) | 7.8E-01 |
| cg12529212 | <i>CPEB1</i>    | chr15 | 5'UTR   | 0.94 | (0.59; 1.48) | 7.8E-01 |
| cg24771104 | <i>SUSD4</i>    | chr1  | Body    | 0.95 | (0.65; 1.39) | 7.8E-01 |
| cg07761328 | <i>ZNF704</i>   | chr8  | Body    | 0.95 | (0.65; 1.39) | 7.8E-01 |
| cg00919987 | <i>TAOK3</i>    | chr12 | TSS1500 | 0.96 | (0.7; 1.31)  | 7.8E-01 |
| cg09193477 | <i>PTPRN2</i>   | chr7  | Body    | 0.96 | (0.71; 1.3)  | 7.8E-01 |
| cg02289020 | <i>CDH13</i>    | chr16 | Body    | 0.94 | (0.62; 1.44) | 7.8E-01 |
| cg27358165 | <i>AKAP13</i>   | chr15 | Body    | 0.96 | (0.71; 1.29) | 7.8E-01 |
| cg14196195 | <i>CHFR</i>     | chr12 | Body    | 1.05 | (0.76; 1.44) | 7.8E-01 |
| cg25025247 | <i>CSMD2</i>    | chr1  | TSS1500 | 1.04 | (0.77; 1.41) | 7.8E-01 |
| cg06000610 | <i>PTPRN2</i>   | chr7  | Body    | 0.95 | (0.68; 1.33) | 7.8E-01 |
| cg06420962 | <i>ERI3</i>     | chr1  | Body    | 0.96 | (0.7; 1.3)   | 7.8E-01 |
| cg12756945 | <i>PTPRN2</i>   | chr7  | Body    | 0.95 | (0.64; 1.41) | 7.8E-01 |
| cg04854462 | <i>MTCL1</i>    | chr18 | Body    | 1.05 | (0.75; 1.46) | 7.8E-01 |
| cg17516945 | <i>DDHD2</i>    | chr8  | TSS1500 | 0.96 | (0.7; 1.31)  | 7.8E-01 |
| cg19139509 | <i>CNTNAP2</i>  | chr7  | Body    | 0.94 | (0.63; 1.42) | 7.8E-01 |
| cg21587319 | <i>PTPRN2</i>   | chr7  | Body    | 0.96 | (0.71; 1.29) | 7.8E-01 |
| cg05697849 | <i>ELAVL4</i>   | chr1  | 1stExon | 1.06 | (0.71; 1.56) | 7.8E-01 |
| cg05697849 | <i>ELAVL4</i>   | chr1  | 5'UTR   | 1.06 | (0.71; 1.56) | 7.8E-01 |
| cg13553120 | <i>PEX14</i>    | chr1  | Body    | 1.05 | (0.75; 1.45) | 7.8E-01 |
| cg18634690 | <i>GNA12</i>    | chr7  | Body    | 1.05 | (0.74; 1.48) | 7.8E-01 |
| cg20785956 | <i>CACNA1C</i>  | chr12 | Body    | 1.04 | (0.77; 1.41) | 7.9E-01 |
| cg09840968 | <i>MEIS2</i>    | chr15 | TSS1500 | 0.95 | (0.68; 1.33) | 7.9E-01 |
| cg25500204 | <i>TNR</i>      | chr1  | 5'UTR   | 0.96 | (0.7; 1.3)   | 7.9E-01 |
| cg05986374 | <i>PTPRN2</i>   | chr7  | Body    | 1.07 | (0.66; 1.73) | 7.9E-01 |
| cg20770435 | <i>BRUNOL4</i>  | chr18 | Body    | 1.05 | (0.74; 1.49) | 7.9E-01 |
| cg01954585 | <i>AKAP13</i>   | chr15 | Body    | 0.96 | (0.69; 1.33) | 7.9E-01 |
| cg10295773 | <i>WWOX</i>     | chr16 | Body    | 1.08 | (0.63; 1.85) | 7.9E-01 |
| cg09863630 | <i>MEIS2</i>    | chr15 | Body    | 1.04 | (0.76; 1.43) | 7.9E-01 |
| cg07191791 | <i>SUSD4</i>    | chr1  | Body    | 0.95 | (0.63; 1.42) | 7.9E-01 |
| cg27011355 | <i>CTNND2</i>   | chr5  | Body    | 0.96 | (0.7; 1.31)  | 7.9E-01 |



|            |         |       |         |      |              |         |
|------------|---------|-------|---------|------|--------------|---------|
| cg12950817 | CACNA1C | chr12 | Body    | 1.05 | (0.74; 1.48) | 7.9E-01 |
| cg22531685 | PTPRN2  | chr7  | Body    | 1.05 | (0.73; 1.52) | 7.9E-01 |
| cg00232445 | WWOX    | chr16 | Body    | 1.05 | (0.74; 1.5)  | 7.9E-01 |
| cg05038432 | NDUFA9  | chr12 | Body    | 0.96 | (0.69; 1.32) | 7.9E-01 |
| cg02639601 | TNRC18  | chr7  | Body    | 0.96 | (0.72; 1.28) | 7.9E-01 |
| cg11353647 | PTPRN2  | chr7  | Body    | 0.96 | (0.7; 1.31)  | 7.9E-01 |
| cg06622286 | RTN4    | chr2  | Body    | 1.06 | (0.69; 1.62) | 7.9E-01 |
| cg06622286 | RTN4    | chr2  | 5'UTR   | 1.06 | (0.69; 1.62) | 7.9E-01 |
| cg12334034 | CUX2    | chr12 | Body    | 1.05 | (0.73; 1.52) | 7.9E-01 |
| cg18830831 | MTNR1A  | chr4  | 3'UTR   | 1.05 | (0.73; 1.5)  | 7.9E-01 |
| cg17368558 | CACNA1C | chr12 | Body    | 1.05 | (0.73; 1.51) | 7.9E-01 |
| cg27559224 | HMGB4   | chr1  | 5'UTR   | 1.06 | (0.68; 1.66) | 7.9E-01 |
| cg27559224 | HMGB4   | chr1  | TSS1500 | 1.06 | (0.68; 1.66) | 7.9E-01 |
| cg27559224 | CSMD2   | chr1  | Body    | 1.06 | (0.68; 1.66) | 7.9E-01 |
| cg26161045 | RTN4    | chr2  | TSS1500 | 0.96 | (0.69; 1.32) | 7.9E-01 |
| cg26161045 | RTN4    | chr2  | 1stExon | 0.96 | (0.69; 1.32) | 7.9E-01 |
| cg08373769 | PTPRN2  | chr7  | Body    | 1.04 | (0.76; 1.44) | 7.9E-01 |
| cg05985663 | CREBBP  | chr16 | TSS1500 | 0.96 | (0.71; 1.29) | 7.9E-01 |
| cg14849447 | NOL4L   | chr20 | Body    | 0.93 | (0.57; 1.53) | 7.9E-01 |
| cg23859303 | PTPRN2  | chr7  | Body    | 0.96 | (0.7; 1.31)  | 7.9E-01 |
| cg11128956 | PTPRN2  | chr7  | Body    | 0.95 | (0.67; 1.35) | 7.9E-01 |
| cg13538299 | PTPRN2  | chr7  | Body    | 0.94 | (0.6; 1.47)  | 7.9E-01 |
| cg01704939 | ACVR2A  | chr2  | Body    | 0.94 | (0.57; 1.53) | 7.9E-01 |
| cg18944685 | CDH13   | chr16 | Body    | 0.95 | (0.65; 1.38) | 7.9E-01 |
| cg04450200 | AKAP13  | chr15 | Body    | 1.06 | (0.69; 1.64) | 7.9E-01 |
| cg08600054 | PTPRN2  | chr7  | Body    | 0.96 | (0.69; 1.33) | 7.9E-01 |
| cg05171921 | PTPRN2  | chr7  | Body    | 1.04 | (0.77; 1.42) | 7.9E-01 |
| cg18577239 | ATF7    | chr12 | Body    | 0.94 | (0.61; 1.45) | 7.9E-01 |
| cg26573492 | PTPRS   | chr19 | Body    | 1.05 | (0.73; 1.5)  | 7.9E-01 |
| cg16358453 | TAOK3   | chr12 | Body    | 1.04 | (0.76; 1.44) | 7.9E-01 |
| cg26990527 | WWOX    | chr16 | Body    | 1.05 | (0.75; 1.46) | 7.9E-01 |
| cg22795471 | PTPRU   | chr1  | Body    | 1.06 | (0.69; 1.62) | 7.9E-01 |
| cg06835392 | CUX2    | chr12 | Body    | 0.95 | (0.66; 1.37) | 7.9E-01 |
| cg06715136 | PTPRN2  | chr7  | Body    | 0.96 | (0.7; 1.31)  | 7.9E-01 |
| cg17949170 | SMARCD3 | chr7  | TSS200  | 1.04 | (0.79; 1.35) | 7.9E-01 |
| cg17949170 | SMARCD3 | chr7  | Body    | 1.04 | (0.79; 1.35) | 7.9E-01 |
| cg23727674 | ACVR2A  | chr2  | Body    | 0.95 | (0.68; 1.35) | 7.9E-01 |
| cg17170812 | TENM2   | chr5  | Body    | 0.96 | (0.69; 1.32) | 7.9E-01 |
| cg05378233 | NRXN1   | chr2  | 5'UTR   | 0.95 | (0.63; 1.42) | 7.9E-01 |
| cg05378233 | NRXN1   | chr2  | 1stExon | 0.95 | (0.63; 1.42) | 7.9E-01 |
| cg04870498 | TNRC6B  | chr22 | Body    | 1.05 | (0.75; 1.45) | 7.9E-01 |
| cg04870498 | TNRC6B  | chr22 | TSS200  | 1.05 | (0.75; 1.45) | 7.9E-01 |
| cg01706445 | ATF7IP  | chr12 | TSS1500 | 0.95 | (0.65; 1.39) | 7.9E-01 |
| cg11677524 | PTPRN2  | chr7  | Body    | 0.96 | (0.68; 1.34) | 7.9E-01 |
| cg06695027 | FBXO38  | chr5  | 5'UTR   | 1.04 | (0.76; 1.44) | 7.9E-01 |
| cg23834301 | TNRC6B  | chr22 | Body    | 1.06 | (0.69; 1.62) | 7.9E-01 |
| cg07466622 | PHACTR1 | chr6  | Body    | 0.95 | (0.63; 1.43) | 7.9E-01 |
| cg21641814 | WWOX    | chr16 | Body    | 0.95 | (0.65; 1.4)  | 7.9E-01 |
| cg15898192 | CHFR    | chr12 | Body    | 1.04 | (0.76; 1.43) | 7.9E-01 |
| cg25314840 | WAC     | chr10 | TSS200  | 0.96 | (0.69; 1.33) | 7.9E-01 |
| cg25314840 | WAC     | chr10 | TSS1500 | 0.96 | (0.69; 1.33) | 7.9E-01 |
| cg08589270 | SMARCD3 | chr7  | Body    | 0.96 | (0.71; 1.3)  | 7.9E-01 |
| cg00604729 | ARID1A  | chr1  | ExonBnd | 1.05 | (0.75; 1.46) | 7.9E-01 |
| cg00604729 | ARID1A  | chr1  | Body    | 1.05 | (0.75; 1.46) | 7.9E-01 |
| cg15408828 | TDRP    | chr8  | TSS1500 | 0.93 | (0.55; 1.57) | 7.9E-01 |
| cg15408828 | TDRP    | chr8  | TSS200  | 0.93 | (0.55; 1.57) | 7.9E-01 |
| cg27629384 | PTPRN2  | chr7  | Body    | 1.05 | (0.71; 1.57) | 7.9E-01 |
| cg14345978 | GNA12   | chr7  | Body    | 0.96 | (0.7; 1.32)  | 7.9E-01 |
| cg14345978 | GNA12   | chr7  | TSS1500 | 0.96 | (0.7; 1.32)  | 7.9E-01 |
| cg04132891 | CCDC80  | chr3  | Body    | 0.95 | (0.63; 1.42) | 7.9E-01 |
| cg14733103 | CUX2    | chr12 | Body    | 0.96 | (0.68; 1.35) | 7.9E-01 |



|            |              |       |         |      |              |         |
|------------|--------------|-------|---------|------|--------------|---------|
| cg16081185 | NOL4         | chr18 | 5'UTR   | 0.95 | (0.65; 1.39) | 7.9E-01 |
| cg16081185 | NOL4         | chr18 | Body    | 0.95 | (0.65; 1.39) | 7.9E-01 |
| cg04776122 | TNRC6B       | chr22 | 5'UTR   | 1.05 | (0.74; 1.48) | 7.9E-01 |
| cg24241530 | PTPRN2       | chr7  | Body    | 1.05 | (0.75; 1.46) | 7.9E-01 |
| cg15920906 | CUX2         | chr12 | Body    | 0.91 | (0.43; 1.91) | 8.0E-01 |
| cg06261354 | COL1A2       | chr7  | TSS1500 | 0.96 | (0.72; 1.29) | 8.0E-01 |
| cg15819646 | TNFRSF1B     | chr1  | TSS200  | 1.04 | (0.75; 1.45) | 8.0E-01 |
| cg12489727 | TNRC6C       | chr17 | 3'UTR   | 0.96 | (0.69; 1.33) | 8.0E-01 |
| cg25907853 | TNFRSF19     | chr13 | 5'UTR   | 0.96 | (0.7; 1.31)  | 8.0E-01 |
| cg14949892 | CHFR         | chr12 | Body    | 1.04 | (0.76; 1.44) | 8.0E-01 |
| cg22620803 | PTPRN2       | chr7  | Body    | 1.04 | (0.76; 1.42) | 8.0E-01 |
| cg19629899 | AKAP13       | chr15 | 5'UTR   | 1.04 | (0.76; 1.43) | 8.0E-01 |
| cg07421393 | PTPRN2       | chr7  | Body    | 0.96 | (0.69; 1.33) | 8.0E-01 |
| cg27119715 | NOL4L        | chr20 | Body    | 1.07 | (0.64; 1.8)  | 8.0E-01 |
| cg23475725 | CACNA1C      | chr12 | Body    | 1.07 | (0.65; 1.75) | 8.0E-01 |
| cg04605148 | SLC16A9      | chr10 | 5'UTR   | 1.05 | (0.74; 1.47) | 8.0E-01 |
| cg27282206 | PTPRN2       | chr7  | Body    | 0.96 | (0.69; 1.33) | 8.0E-01 |
| cg01735147 | CACNA1C      | chr12 | Body    | 1.07 | (0.63; 1.82) | 8.0E-01 |
| cg00094303 | CDH11        | chr16 | 5'UTR   | 0.96 | (0.68; 1.34) | 8.0E-01 |
| cg25671785 | CDH13        | chr16 | 5'UTR   | 0.96 | (0.68; 1.34) | 8.0E-01 |
| cg25671785 | CDH13        | chr16 | Body    | 0.96 | (0.68; 1.34) | 8.0E-01 |
| cg08738340 | CDH13        | chr16 | 5'UTR   | 0.95 | (0.65; 1.39) | 8.0E-01 |
| cg08738340 | CDH13        | chr16 | Body    | 0.95 | (0.65; 1.39) | 8.0E-01 |
| cg21029505 | CDH13        | chr16 | Body    | 1.04 | (0.75; 1.45) | 8.0E-01 |
| cg06185440 | PHACTR1      | chr6  | Body    | 1.13 | (0.45; 2.85) | 8.0E-01 |
| cg14641333 | PTPRN2       | chr7  | Body    | 0.95 | (0.67; 1.37) | 8.0E-01 |
| cg08677916 | MEIS2        | chr15 | Body    | 1.06 | (0.69; 1.61) | 8.0E-01 |
| cg24055239 | LOC101929698 | chr20 | Body    | 0.95 | (0.65; 1.39) | 8.0E-01 |
| cg24055239 | NOL4L        | chr20 | Body    | 0.95 | (0.65; 1.39) | 8.0E-01 |
| cg13055436 | ZBTB20       | chr3  | 5'UTR   | 0.94 | (0.6; 1.49)  | 8.0E-01 |
| cg18250135 | TNRC18       | chr7  | Body    | 0.96 | (0.71; 1.3)  | 8.0E-01 |
| cg24084872 | ZBTB20       | chr3  | Body    | 1.07 | (0.65; 1.73) | 8.0E-01 |
| cg24084872 | ZBTB20       | chr3  | 5'UTR   | 1.07 | (0.65; 1.73) | 8.0E-01 |
| cg18056414 | CDH11        | chr16 | 5'UTR   | 1.04 | (0.76; 1.43) | 8.0E-01 |
| cg12472483 | PTPRN2       | chr7  | Body    | 1.05 | (0.74; 1.48) | 8.0E-01 |
| cg14831325 | FBXO38       | chr5  | Body    | 0.95 | (0.65; 1.4)  | 8.0E-01 |
| cg07632790 | DDHD2        | chr8  | Body    | 0.96 | (0.69; 1.34) | 8.0E-01 |
| cg02828078 | TNRC6B       | chr22 | Body    | 0.95 | (0.66; 1.38) | 8.0E-01 |
| cg03714495 | NRXN1        | chr2  | Body    | 0.96 | (0.72; 1.29) | 8.0E-01 |
| cg02645407 | ALCAM        | chr3  | Body    | 0.96 | (0.72; 1.28) | 8.0E-01 |
| cg16619352 | CUX2         | chr12 | Body    | 0.92 | (0.5; 1.72)  | 8.0E-01 |
| cg01657422 | WWOX         | chr16 | Body    | 1.04 | (0.75; 1.44) | 8.0E-01 |
| cg19297703 | WWOX         | chr16 | Body    | 0.96 | (0.68; 1.35) | 8.0E-01 |
| cg15542608 | PHACTR1      | chr6  | Body    | 1.05 | (0.73; 1.51) | 8.0E-01 |
| cg04499601 | RECQL        | chr12 | Body    | 1.05 | (0.71; 1.55) | 8.0E-01 |
| cg09301222 | MBD5         | chr2  | Body    | 0.95 | (0.66; 1.37) | 8.0E-01 |
| cg00379657 | CHFR         | chr12 | Body    | 0.96 | (0.68; 1.35) | 8.0E-01 |
| cg00398510 | ATF7IP2      | chr16 | 5'UTR   | 1.04 | (0.76; 1.42) | 8.0E-01 |
| cg00398510 | ATF7IP2      | chr16 | Body    | 1.04 | (0.76; 1.42) | 8.0E-01 |
| cg27336392 | TSHZ3        | chr19 | Body    | 0.94 | (0.58; 1.52) | 8.0E-01 |
| cg24441888 | DMXL2        | chr15 | 5'UTR   | 0.97 | (0.74; 1.27) | 8.0E-01 |
| cg24441888 | DMXL2        | chr15 | 1stExon | 0.97 | (0.74; 1.27) | 8.0E-01 |
| cg05851741 | ALCAM        | chr3  | Body    | 1.05 | (0.72; 1.53) | 8.0E-01 |
| cg23432930 | CHFR         | chr12 | TSS1500 | 1.05 | (0.74; 1.48) | 8.0E-01 |
| cg08526894 | RTN4RL1      | chr17 | Body    | 0.95 | (0.64; 1.42) | 8.0E-01 |
| cg25003628 | CDH13        | chr16 | 5'UTR   | 0.96 | (0.68; 1.35) | 8.0E-01 |
| cg25003628 | CDH13        | chr16 | Body    | 0.96 | (0.68; 1.35) | 8.0E-01 |
| cg02105042 | TNFRSF12A    | chr16 | TSS1500 | 0.96 | (0.68; 1.35) | 8.0E-01 |
| cg02660277 | PTPRN2       | chr7  | Body    | 0.93 | (0.55; 1.58) | 8.0E-01 |
| cg24301101 | PHACTR1      | chr6  | Body    | 1.04 | (0.75; 1.46) | 8.0E-01 |
| cg05559155 | NRXN1        | chr2  | Body    | 0.94 | (0.6; 1.49)  | 8.0E-01 |



|            |                  |       |         |      |              |         |
|------------|------------------|-------|---------|------|--------------|---------|
| cg09966375 | <i>PTPRN2</i>    | chr7  | Body    | 0.96 | (0.7; 1.32)  | 8.0E-01 |
| cg22308600 | <i>NOL4</i>      | chr18 | Body    | 1.05 | (0.74; 1.48) | 8.0E-01 |
| cg22308600 | <i>NOL4</i>      | chr18 | TSS200  | 1.05 | (0.74; 1.48) | 8.0E-01 |
| cg18020547 | <i>SUSD4</i>     | chr1  | TSS1500 | 1.05 | (0.74; 1.48) | 8.0E-01 |
| cg07331576 | <i>NDUFA9</i>    | chr12 | Body    | 0.93 | (0.52; 1.67) | 8.0E-01 |
| cg26275242 | <i>ERI3</i>      | chr1  | 1stExon | 1.04 | (0.78; 1.38) | 8.0E-01 |
| cg26275242 | <i>ERI3</i>      | chr1  | 5'UTR   | 1.04 | (0.78; 1.38) | 8.0E-01 |
| cg11762629 | <i>CTDSP2</i>    | chr12 | 1stExon | 0.96 | (0.7; 1.32)  | 8.0E-01 |
| cg03185022 | <i>GNA12</i>     | chr7  | TSS200  | 1.04 | (0.76; 1.43) | 8.0E-01 |
| cg10940066 | <i>PTPRN2</i>    | chr7  | Body    | 1.05 | (0.73; 1.51) | 8.0E-01 |
| cg27219574 | <i>CHFR</i>      | chr12 | Body    | 0.96 | (0.71; 1.3)  | 8.0E-01 |
| cg10129944 | <i>PHACTR1</i>   | chr6  | 5'UTR   | 1.04 | (0.77; 1.41) | 8.0E-01 |
| cg26345619 | <i>CACNA1C</i>   | chr12 | Body    | 0.95 | (0.63; 1.42) | 8.0E-01 |
| cg06768423 | <i>TNFRSF10D</i> | chr8  | TSS1500 | 1.05 | (0.74; 1.49) | 8.0E-01 |
| cg23749005 | <i>PTPRN2</i>    | chr7  | Body    | 0.96 | (0.7; 1.32)  | 8.0E-01 |
| cg08747777 | <i>CDH11</i>     | chr16 | TSS1500 | 0.95 | (0.65; 1.4)  | 8.0E-01 |
| cg12070069 | <i>PHACTR1</i>   | chr6  | TSS1500 | 1.04 | (0.76; 1.43) | 8.0E-01 |
| cg06339573 | <i>PTPRN2</i>    | chr7  | Body    | 0.96 | (0.71; 1.31) | 8.0E-01 |
| cg22744587 | <i>BARX2</i>     | chr11 | 3'UTR   | 0.97 | (0.73; 1.28) | 8.0E-01 |
| cg13083427 | <i>PTPRN2</i>    | chr7  | Body    | 0.96 | (0.69; 1.33) | 8.0E-01 |
| cg02902395 | <i>POU2F1</i>    | chr1  | TSS1500 | 1.04 | (0.76; 1.42) | 8.0E-01 |
| cg10533597 | <i>SMARCD3</i>   | chr7  | Body    | 1.05 | (0.71; 1.57) | 8.0E-01 |
| cg07926178 | <i>PTPRN2</i>    | chr7  | Body    | 0.95 | (0.62; 1.45) | 8.0E-01 |
| cg13781197 | <i>PDE8A</i>     | chr15 | Body    | 1.04 | (0.76; 1.44) | 8.0E-01 |
| cg14759472 | <i>PTPRN2</i>    | chr7  | Body    | 0.97 | (0.74; 1.27) | 8.1E-01 |
| cg18021623 | <i>PTPRN2</i>    | chr7  | Body    | 0.95 | (0.64; 1.41) | 8.1E-01 |
| cg22744831 | <i>ZBTB20</i>    | chr3  | Body    | 1.05 | (0.7; 1.58)  | 8.1E-01 |
| cg22744831 | <i>ZBTB20</i>    | chr3  | 5'UTR   | 1.05 | (0.7; 1.58)  | 8.1E-01 |
| cg02174588 | <i>ZNF704</i>    | chr8  | TSS1500 | 0.96 | (0.67; 1.36) | 8.1E-01 |
| cg21863172 | <i>PDE8A</i>     | chr15 | 5'UTR   | 1.05 | (0.72; 1.51) | 8.1E-01 |
| cg21863172 | <i>PDE8A</i>     | chr15 | Body    | 1.05 | (0.72; 1.51) | 8.1E-01 |
| cg24294013 | <i>PEX14</i>     | chr1  | Body    | 0.96 | (0.72; 1.29) | 8.1E-01 |
| cg06097048 | <i>WAC</i>       | chr10 | Body    | 1.06 | (0.68; 1.63) | 8.1E-01 |
| cg16980098 | <i>FBXO36</i>    | chr2  | Body    | 0.96 | (0.72; 1.29) | 8.1E-01 |
| cg09360824 | <i>PTPRN2</i>    | chr7  | Body    | 1.04 | (0.76; 1.43) | 8.1E-01 |
| cg05540431 | <i>ACVR2A</i>    | chr2  | 5'UTR   | 1.05 | (0.71; 1.54) | 8.1E-01 |
| cg05540431 | <i>ACVR2A</i>    | chr2  | Body    | 1.05 | (0.71; 1.54) | 8.1E-01 |
| cg23667391 | <i>CSMD2</i>     | chr1  | Body    | 0.96 | (0.7; 1.32)  | 8.1E-01 |
| cg02058859 | <i>TAOK3</i>     | chr12 | Body    | 0.96 | (0.66; 1.38) | 8.1E-01 |
| cg08171483 | <i>CTDSPL</i>    | chr3  | Body    | 1.04 | (0.76; 1.41) | 8.1E-01 |
| cg01928968 | <i>CNTNAP2</i>   | chr7  | Body    | 1.04 | (0.77; 1.4)  | 8.1E-01 |
| cg09217522 | <i>GOLT1B</i>    | chr12 | Body    | 0.96 | (0.7; 1.32)  | 8.1E-01 |
| cg09217522 | <i>RECQL</i>     | chr12 | TSS1500 | 0.96 | (0.7; 1.32)  | 8.1E-01 |
| cg15061647 | <i>PTPRN2</i>    | chr7  | Body    | 0.95 | (0.66; 1.38) | 8.1E-01 |
| cg17160317 | <i>NOL4</i>      | chr18 | 5'UTR   | 1.04 | (0.74; 1.46) | 8.1E-01 |
| cg17160317 | <i>NOL4</i>      | chr18 | Body    | 1.04 | (0.74; 1.46) | 8.1E-01 |
| cg22417032 | <i>PTPRN2</i>    | chr7  | Body    | 0.96 | (0.69; 1.33) | 8.1E-01 |
| cg06152586 | <i>PTPRN2</i>    | chr7  | Body    | 1.03 | (0.79; 1.36) | 8.1E-01 |
| cg01930524 | <i>RECQL5</i>    | chr17 | Body    | 1.04 | (0.75; 1.44) | 8.1E-01 |
| cg17162069 | <i>PTPRN2</i>    | chr7  | Body    | 1.07 | (0.62; 1.84) | 8.1E-01 |
| cg16419421 | <i>PTPRN2</i>    | chr7  | Body    | 0.96 | (0.71; 1.31) | 8.1E-01 |
| cg01820584 | <i>DCUN1D4</i>   | chr4  | Body    | 1.04 | (0.74; 1.48) | 8.1E-01 |
| cg26484073 | <i>RTN4RL1</i>   | chr17 | Body    | 0.96 | (0.67; 1.37) | 8.1E-01 |
| cg07217499 | <i>CACNA1C</i>   | chr12 | Body    | 0.94 | (0.57; 1.54) | 8.1E-01 |
| cg11376706 | <i>PTPRN2</i>    | chr7  | Body    | 1.04 | (0.76; 1.43) | 8.1E-01 |
| cg25619609 | <i>MBD5</i>      | chr2  | 3'UTR   | 0.94 | (0.55; 1.6)  | 8.1E-01 |
| cg07638822 | <i>PTPRN2</i>    | chr7  | Body    | 1.04 | (0.74; 1.46) | 8.1E-01 |
| cg04432137 | <i>CREBBP</i>    | chr16 | Body    | 1.05 | (0.73; 1.51) | 8.1E-01 |
| cg01014438 | <i>CACNA1C</i>   | chr12 | Body    | 0.96 | (0.72; 1.29) | 8.1E-01 |
| cg18295261 | <i>FBXO34</i>    | chr14 | TSS1500 | 0.96 | (0.7; 1.32)  | 8.1E-01 |
| cg00927151 | <i>SCAF8</i>     | chr6  | Body    | 0.94 | (0.56; 1.57) | 8.1E-01 |



|            |                 |       |         |      |              |         |
|------------|-----------------|-------|---------|------|--------------|---------|
| cg10051634 | <i>MTCL1</i>    | chr18 | Body    | 1.06 | (0.67; 1.68) | 8.1E-01 |
| cg02100604 | <i>CEP350</i>   | chr1  | Body    | 0.96 | (0.69; 1.33) | 8.1E-01 |
| cg22807241 | <i>CNTNAP2</i>  | chr7  | Body    | 1.05 | (0.72; 1.52) | 8.1E-01 |
| cg09632458 | <i>PTPRN2</i>   | chr7  | Body    | 0.96 | (0.71; 1.31) | 8.1E-01 |
| cg04970144 | <i>CTNND2</i>   | chr5  | Body    | 0.96 | (0.69; 1.34) | 8.1E-01 |
| cg04970144 | <i>CTNND2</i>   | chr5  | 5'UTR   | 0.96 | (0.69; 1.34) | 8.1E-01 |
| cg19963142 | <i>ZFP91</i>    | chr11 | TSS1500 | 0.96 | (0.71; 1.3)  | 8.1E-01 |
| cg23669611 | <i>RTN4RL1</i>  | chr17 | Body    | 0.95 | (0.64; 1.42) | 8.1E-01 |
| cg20733017 | <i>PTPRN2</i>   | chr7  | Body    | 1.05 | (0.69; 1.61) | 8.1E-01 |
| cg05956920 | <i>WWOX</i>     | chr16 | Body    | 0.96 | (0.7; 1.33)  | 8.1E-01 |
| cg09397542 | <i>PHACTR1</i>  | chr6  | 5'UTR   | 1.04 | (0.76; 1.41) | 8.1E-01 |
| cg17138151 | <i>TAOK3</i>    | chr12 | 5'UTR   | 1.04 | (0.77; 1.39) | 8.1E-01 |
| cg10386660 | <i>WWOX</i>     | chr16 | Body    | 1.04 | (0.75; 1.45) | 8.1E-01 |
| cg16494747 | <i>CDH13</i>    | chr16 | TSS1500 | 1.04 | (0.75; 1.45) | 8.1E-01 |
| cg13531018 | <i>NRXN1</i>    | chr2  | Body    | 0.95 | (0.64; 1.42) | 8.1E-01 |
| cg05550328 | <i>CHCHD6</i>   | chr3  | Body    | 0.96 | (0.69; 1.33) | 8.1E-01 |
| cg24041338 | <i>TNR</i>      | chr1  | 5'UTR   | 0.96 | (0.69; 1.34) | 8.1E-01 |
| cg15618071 | <i>CHCHD6</i>   | chr3  | Body    | 0.96 | (0.69; 1.33) | 8.1E-01 |
| cg27353346 | <i>BRUNOL4</i>  | chr18 | Body    | 0.96 | (0.68; 1.35) | 8.1E-01 |
| cg05547059 | <i>WWOX</i>     | chr16 | Body    | 1.04 | (0.74; 1.46) | 8.1E-01 |
| cg12082283 | <i>CEP350</i>   | chr1  | 5'UTR   | 1.04 | (0.74; 1.47) | 8.1E-01 |
| cg12814185 | <i>CHD6</i>     | chr20 | 5'UTR   | 0.96 | (0.69; 1.34) | 8.1E-01 |
| cg07794150 | <i>CSMD2</i>    | chr1  | Body    | 1.04 | (0.76; 1.42) | 8.1E-01 |
| cg18045878 | <i>TNRC6A</i>   | chr16 | Body    | 0.96 | (0.66; 1.38) | 8.1E-01 |
| cg16754374 | <i>ELAVL4</i>   | chr1  | TSS1500 | 1.04 | (0.78; 1.38) | 8.1E-01 |
| cg16710124 | <i>ERI3</i>     | chr1  | Body    | 0.96 | (0.7; 1.32)  | 8.1E-01 |
| cg11046772 | <i>CACNA1C</i>  | chr12 | Body    | 0.96 | (0.67; 1.37) | 8.1E-01 |
| cg10138919 | <i>AKAP13</i>   | chr15 | TSS200  | 1.04 | (0.76; 1.42) | 8.1E-01 |
| cg00049102 | <i>DACH1</i>    | chr13 | Body    | 1.04 | (0.75; 1.45) | 8.1E-01 |
| cg10364896 | <i>CREBBP</i>   | chr16 | Body    | 1.04 | (0.77; 1.39) | 8.1E-01 |
| cg07658449 | <i>CUX2</i>     | chr12 | Body    | 1.04 | (0.75; 1.43) | 8.1E-01 |
| cg04368945 | <i>NOL4L</i>    | chr20 | Body    | 1.04 | (0.76; 1.43) | 8.1E-01 |
| cg26548251 | <i>CNTNAP2</i>  | chr7  | Body    | 0.96 | (0.66; 1.39) | 8.1E-01 |
| cg11968286 | <i>TNFRSF19</i> | chr13 | 5'UTR   | 0.95 | (0.64; 1.41) | 8.1E-01 |
| cg26009245 | <i>ERI3</i>     | chr1  | TSS200  | 0.97 | (0.72; 1.29) | 8.1E-01 |
| cg27446566 | <i>TXNDC9</i>   | chr2  | TSS200  | 1.04 | (0.76; 1.41) | 8.1E-01 |
| cg00911813 | <i>TNRC18</i>   | chr7  | 5'UTR   | 1.05 | (0.72; 1.53) | 8.1E-01 |
| cg22519705 | <i>FBXO11</i>   | chr2  | ExonBnd | 1.06 | (0.65; 1.73) | 8.1E-01 |
| cg22519705 | <i>FBXO11</i>   | chr2  | Body    | 1.06 | (0.65; 1.73) | 8.1E-01 |
| cg19619064 | <i>PTPRU</i>    | chr1  | TSS1500 | 1.04 | (0.75; 1.45) | 8.1E-01 |
| cg02941085 | <i>PTPRN2</i>   | chr7  | Body    | 1.04 | (0.75; 1.43) | 8.1E-01 |
| cg23599716 | <i>ERI3</i>     | chr1  | 3'UTR   | 0.95 | (0.64; 1.43) | 8.1E-01 |
| cg11424674 | <i>ERI3</i>     | chr1  | Body    | 0.96 | (0.68; 1.36) | 8.1E-01 |
| cg12744722 | <i>CUX2</i>     | chr12 | Body    | 1.07 | (0.63; 1.82) | 8.1E-01 |
| cg06788172 | <i>DMXL2</i>    | chr15 | TSS200  | 0.96 | (0.67; 1.37) | 8.2E-01 |
| cg15208519 | <i>TNFRSF1B</i> | chr1  | Body    | 0.96 | (0.67; 1.38) | 8.2E-01 |
| cg09146903 | <i>COL1A2</i>   | chr7  | TSS200  | 1.05 | (0.69; 1.6)  | 8.2E-01 |
| cg03935579 | <i>ALCAM</i>    | chr3  | Body    | 0.96 | (0.71; 1.31) | 8.2E-01 |
| cg19205498 | <i>CHFR</i>     | chr12 | Body    | 0.96 | (0.7; 1.32)  | 8.2E-01 |
| cg00036710 | <i>FBXO36</i>   | chr2  | 3'UTR   | 0.95 | (0.59; 1.52) | 8.2E-01 |
| cg26896179 | <i>FBXO11</i>   | chr2  | Body    | 0.96 | (0.7; 1.33)  | 8.2E-01 |
| cg00973286 | <i>TNFRSF1A</i> | chr12 | 5'UTR   | 1.04 | (0.74; 1.46) | 8.2E-01 |
| cg00973286 | <i>TNFRSF1A</i> | chr12 | 1stExon | 1.04 | (0.74; 1.46) | 8.2E-01 |
| cg12765562 | <i>ERI3</i>     | chr1  | Body    | 1.04 | (0.77; 1.4)  | 8.2E-01 |
| cg08822689 | <i>WWOX</i>     | chr16 | Body    | 0.96 | (0.67; 1.37) | 8.2E-01 |
| cg11817192 | <i>GNA12</i>    | chr7  | Body    | 1.04 | (0.73; 1.49) | 8.2E-01 |
| cg02214305 | <i>PTPRN2</i>   | chr7  | Body    | 0.96 | (0.65; 1.41) | 8.2E-01 |
| cg26474048 | <i>PTPRN2</i>   | chr7  | Body    | 0.96 | (0.69; 1.35) | 8.2E-01 |
| cg11367149 | <i>ATF7</i>     | chr12 | Body    | 1.04 | (0.77; 1.39) | 8.2E-01 |
| cg09483067 | <i>TNFRSF1A</i> | chr12 | TSS200  | 1.04 | (0.74; 1.47) | 8.2E-01 |
| cg11318054 | <i>PTPRN2</i>   | chr7  | Body    | 0.96 | (0.69; 1.34) | 8.2E-01 |



|            |                  |       |         |      |              |         |
|------------|------------------|-------|---------|------|--------------|---------|
| cg12783346 | <i>FBXO11</i>    | chr2  | 5'UTR   | 0.95 | (0.62; 1.45) | 8.2E-01 |
| cg21262834 | <i>PTPRN2</i>    | chr7  | Body    | 1.05 | (0.71; 1.54) | 8.2E-01 |
| cg23494458 | <i>SUSD4</i>     | chr1  | 5'UTR   | 0.96 | (0.7; 1.32)  | 8.2E-01 |
| cg07753525 | <i>WVOX</i>      | chr16 | Body    | 1.04 | (0.73; 1.5)  | 8.2E-01 |
| cg11072645 | <i>PTPRN2</i>    | chr7  | Body    | 1.04 | (0.74; 1.46) | 8.2E-01 |
| cg09024685 | <i>AKAP13</i>    | chr15 | Body    | 0.91 | (0.42; 1.99) | 8.2E-01 |
| cg15552845 | <i>TNR</i>       | chr1  | Body    | 0.96 | (0.71; 1.31) | 8.2E-01 |
| cg04336561 | <i>PTPRN2</i>    | chr7  | Body    | 0.95 | (0.61; 1.47) | 8.2E-01 |
| cg11449689 | <i>FBXO34</i>    | chr14 | TSS200  | 1.04 | (0.76; 1.42) | 8.2E-01 |
| cg11449689 | <i>FBXO34</i>    | chr14 | 5'UTR   | 1.04 | (0.76; 1.42) | 8.2E-01 |
| cg04849508 | <i>GNA12</i>     | chr7  | Body    | 1.04 | (0.74; 1.48) | 8.2E-01 |
| cg02519218 | <i>CHFR</i>      | chr12 | Body    | 0.94 | (0.54; 1.62) | 8.2E-01 |
| cg19571504 | <i>CUX2</i>      | chr12 | Body    | 0.95 | (0.64; 1.42) | 8.2E-01 |
| cg25447144 | <i>MEIS2</i>     | chr15 | Body    | 0.95 | (0.64; 1.42) | 8.2E-01 |
| cg07015608 | <i>PTPRN2</i>    | chr7  | Body    | 0.96 | (0.66; 1.38) | 8.2E-01 |
| cg26517831 | <i>GNA12</i>     | chr7  | 3'UTR   | 0.96 | (0.69; 1.34) | 8.2E-01 |
| cg13710390 | <i>TENM2</i>     | chr5  | Body    | 0.97 | (0.73; 1.28) | 8.2E-01 |
| cg08365738 | <i>CCDC80</i>    | chr3  | Body    | 1.05 | (0.68; 1.64) | 8.2E-01 |
| cg06408759 | <i>RTN4R</i>     | chr22 | Body    | 0.94 | (0.55; 1.6)  | 8.2E-01 |
| cg19207930 | <i>TAOK3</i>     | chr12 | Body    | 1.04 | (0.73; 1.49) | 8.2E-01 |
| cg20682895 | <i>PTPRN2</i>    | chr7  | Body    | 1.04 | (0.76; 1.41) | 8.2E-01 |
| cg06952529 | <i>WVOX</i>      | chr16 | Body    | 1.04 | (0.73; 1.49) | 8.2E-01 |
| cg20499859 | <i>CTDSP2</i>    | chr12 | TSS200  | 0.96 | (0.7; 1.33)  | 8.2E-01 |
| cg23145996 | <i>CACNA1C</i>   | chr12 | Body    | 1.04 | (0.75; 1.43) | 8.2E-01 |
| cg27211158 | <i>ATP6V0C</i>   | chr16 | Body    | 1.04 | (0.75; 1.43) | 8.2E-01 |
| cg04155750 | <i>CDH13</i>     | chr16 | 5'UTR   | 0.97 | (0.72; 1.3)  | 8.2E-01 |
| cg04155750 | <i>CDH13</i>     | chr16 | Body    | 0.97 | (0.72; 1.3)  | 8.2E-01 |
| cg08748098 | <i>WVOX</i>      | chr16 | Body    | 1.04 | (0.74; 1.45) | 8.2E-01 |
| cg19711800 | <i>ERI3</i>      | chr1  | Body    | 1.04 | (0.73; 1.48) | 8.2E-01 |
| cg25564954 | <i>AKAP13</i>    | chr15 | Body    | 1.05 | (0.71; 1.54) | 8.2E-01 |
| cg06781608 | <i>PTPRN2</i>    | chr7  | Body    | 1.04 | (0.74; 1.45) | 8.2E-01 |
| cg25735076 | <i>PTPRN2</i>    | chr7  | Body    | 1.04 | (0.76; 1.41) | 8.2E-01 |
| cg23209537 | <i>TNRC18</i>    | chr7  | TSS1500 | 1.05 | (0.67; 1.66) | 8.2E-01 |
| cg00635695 | <i>PTPRN2</i>    | chr7  | Body    | 0.97 | (0.71; 1.31) | 8.2E-01 |
| cg08021865 | <i>CSMD2</i>     | chr1  | Body    | 0.96 | (0.7; 1.33)  | 8.2E-01 |
| cg27331316 | <i>CSMD2</i>     | chr1  | Body    | 0.96 | (0.68; 1.36) | 8.2E-01 |
| cg05142929 | <i>TNFRSF11A</i> | chr18 | Body    | 1.04 | (0.73; 1.49) | 8.2E-01 |
| cg06133671 | <i>CHCHD6</i>    | chr3  | Body    | 1.04 | (0.76; 1.4)  | 8.2E-01 |
| cg04395875 | <i>CUX2</i>      | chr12 | Body    | 1.04 | (0.74; 1.45) | 8.2E-01 |
| cg21232767 | <i>PTPRN2</i>    | chr7  | Body    | 0.96 | (0.67; 1.37) | 8.2E-01 |
| cg17430920 | <i>PHACTR1</i>   | chr6  | Body    | 0.96 | (0.68; 1.36) | 8.2E-01 |
| cg20528787 | <i>PTPRN2</i>    | chr7  | Body    | 0.97 | (0.71; 1.31) | 8.2E-01 |
| cg07624595 | <i>SGIP1</i>     | chr1  | Body    | 0.95 | (0.6; 1.5)   | 8.2E-01 |
| cg20633024 | <i>CEP350</i>    | chr1  | Body    | 1.05 | (0.7; 1.57)  | 8.2E-01 |
| cg05176146 | <i>FBXO38</i>    | chr5  | TSS200  | 1.03 | (0.77; 1.38) | 8.2E-01 |
| cg10700275 | <i>CEP350</i>    | chr1  | TSS1500 | 1.04 | (0.75; 1.43) | 8.2E-01 |
| cg00423811 | <i>PTPRN2</i>    | chr7  | Body    | 1.04 | (0.75; 1.43) | 8.2E-01 |
| cg10279167 | <i>CREBBP</i>    | chr16 | Body    | 0.97 | (0.72; 1.3)  | 8.2E-01 |
| cg23677103 | <i>PTPRN2</i>    | chr7  | Body    | 1.04 | (0.73; 1.48) | 8.2E-01 |
| cg14725952 | <i>PTPRS</i>     | chr19 | 5'UTR   | 0.96 | (0.64; 1.43) | 8.2E-01 |
| cg15272173 | <i>PTPRN2</i>    | chr7  | Body    | 0.97 | (0.72; 1.3)  | 8.2E-01 |
| cg09031719 | <i>SGIP1</i>     | chr1  | Body    | 1.04 | (0.73; 1.47) | 8.2E-01 |
| cg13000125 | <i>NRXN1</i>     | chr2  | Body    | 1.04 | (0.75; 1.44) | 8.2E-01 |
| cg01951170 | <i>GNA12</i>     | chr7  | Body    | 1.04 | (0.73; 1.49) | 8.2E-01 |
| cg00621187 | <i>AKAP3</i>     | chr12 | TSS200  | 0.96 | (0.7; 1.33)  | 8.2E-01 |
| cg00621187 | <i>NDUFA9</i>    | chr12 | 1stExon | 0.96 | (0.7; 1.33)  | 8.2E-01 |
| cg16747717 | <i>WVOX</i>      | chr16 | Body    | 0.96 | (0.7; 1.33)  | 8.2E-01 |
| cg25158958 | <i>DMXL2</i>     | chr15 | Body    | 1.06 | (0.64; 1.74) | 8.2E-01 |
| cg05307957 | <i>ARID1A</i>    | chr1  | Body    | 0.96 | (0.66; 1.39) | 8.2E-01 |
| cg26130729 | <i>TNRC18</i>    | chr7  | Body    | 1.04 | (0.73; 1.48) | 8.2E-01 |
| cg25073700 | <i>PTPRN2</i>    | chr7  | Body    | 0.97 | (0.71; 1.32) | 8.2E-01 |



|            |                  |       |         |      |              |         |
|------------|------------------|-------|---------|------|--------------|---------|
| cg14623927 | <i>PTPRU</i>     | chr1  | Body    | 1.05 | (0.69; 1.59) | 8.2E-01 |
| cg14689355 | <i>ACVR2A</i>    | chr2  | TSS200  | 0.96 | (0.67; 1.37) | 8.3E-01 |
| cg20867820 | <i>CDH13</i>     | chr16 | Body    | 0.95 | (0.63; 1.45) | 8.3E-01 |
| cg04605940 | <i>PTPRN2</i>    | chr7  | Body    | 1.04 | (0.74; 1.45) | 8.3E-01 |
| cg04240062 | <i>ALCAM</i>     | chr3  | Body    | 1.04 | (0.73; 1.48) | 8.3E-01 |
| cg27531356 | <i>CNTNAP2</i>   | chr7  | Body    | 0.97 | (0.71; 1.32) | 8.3E-01 |
| cg13018447 | <i>RNU5E-1</i>   | chr5  | Body    | 0.96 | (0.68; 1.36) | 8.3E-01 |
| cg01669242 | <i>PTPRN2</i>    | chr7  | Body    | 1.05 | (0.7; 1.55)  | 8.3E-01 |
| cg14494661 | <i>WAC</i>       | chr10 | 3'UTR   | 0.96 | (0.69; 1.35) | 8.3E-01 |
| cg15350062 | <i>PTPRN2</i>    | chr7  | Body    | 1.04 | (0.76; 1.41) | 8.3E-01 |
| cg20962234 | <i>ELAVL4</i>    | chr1  | Body    | 1.04 | (0.76; 1.42) | 8.3E-01 |
| cg00786658 | <i>TSHZ3</i>     | chr19 | TSS1500 | 1.04 | (0.75; 1.43) | 8.3E-01 |
| cg19594254 | <i>ATF7</i>      | chr12 | Body    | 1.04 | (0.72; 1.5)  | 8.3E-01 |
| cg16627911 | <i>PTPRN2</i>    | chr7  | Body    | 0.97 | (0.72; 1.3)  | 8.3E-01 |
| cg13782388 | <i>CHCHD6</i>    | chr3  | Body    | 1.04 | (0.75; 1.44) | 8.3E-01 |
| cg21761232 | <i>FBXO34</i>    | chr14 | TSS1500 | 1.04 | (0.71; 1.53) | 8.3E-01 |
| cg21761232 | <i>FBXO34</i>    | chr14 | TSS200  | 1.04 | (0.71; 1.53) | 8.3E-01 |
| cg01224922 | <i>CACNA1C</i>   | chr12 | Body    | 1.04 | (0.75; 1.43) | 8.3E-01 |
| cg16821068 | <i>BARX2</i>     | chr11 | TSS200  | 1.05 | (0.7; 1.56)  | 8.3E-01 |
| cg10964421 | <i>TNFRSF10D</i> | chr8  | Body    | 0.97 | (0.7; 1.33)  | 8.3E-01 |
| cg13138137 | <i>BRUNOL4</i>   | chr18 | TSS1500 | 1.04 | (0.73; 1.49) | 8.3E-01 |
| cg26505371 | <i>PTPRS</i>     | chr19 | Body    | 1.04 | (0.75; 1.44) | 8.3E-01 |
| cg01607771 | <i>NOL4L</i>     | chr20 | Body    | 1.03 | (0.77; 1.39) | 8.3E-01 |
| cg01607771 | <i>NOL4L</i>     | chr20 | 5'UTR   | 1.03 | (0.77; 1.39) | 8.3E-01 |
| cg06420129 | <i>TNRC6A</i>    | chr16 | Body    | 0.96 | (0.68; 1.37) | 8.3E-01 |
| cg24862984 | <i>PTPRN2</i>    | chr7  | Body    | 0.96 | (0.7; 1.34)  | 8.3E-01 |
| cg17654470 | <i>RTN4R</i>     | chr22 | Body    | 0.96 | (0.66; 1.39) | 8.3E-01 |
| cg13486056 | <i>PTPRN2</i>    | chr7  | Body    | 1.03 | (0.76; 1.4)  | 8.3E-01 |
| cg19717773 | <i>GNA12</i>     | chr7  | Body    | 0.97 | (0.71; 1.31) | 8.3E-01 |
| cg11629955 | <i>CHCHD6</i>    | chr3  | 3'UTR   | 0.96 | (0.67; 1.38) | 8.3E-01 |
| cg08579279 | <i>FBXO31</i>    | chr16 | 5'UTR   | 0.96 | (0.66; 1.4)  | 8.3E-01 |
| cg22987575 | <i>TAOK3</i>     | chr12 | 5'UTR   | 1.08 | (0.54; 2.16) | 8.3E-01 |
| cg18705861 | <i>CTDSPL2</i>   | chr15 | TSS1500 | 1.04 | (0.71; 1.54) | 8.3E-01 |
| cg07755794 | <i>TNRC6B</i>    | chr22 | Body    | 1.06 | (0.63; 1.79) | 8.3E-01 |
| cg16516888 | <i>C11orf67</i>  | chr11 | 5'UTR   | 0.96 | (0.68; 1.36) | 8.3E-01 |
| cg17527969 | <i>PTPRN2</i>    | chr7  | Body    | 0.96 | (0.68; 1.37) | 8.3E-01 |
| cg05164449 | <i>PTPRN2</i>    | chr7  | Body    | 0.97 | (0.72; 1.29) | 8.3E-01 |
| cg13999106 | <i>NRXN1</i>     | chr2  | TSS1500 | 1.04 | (0.75; 1.43) | 8.3E-01 |
| cg17422574 | <i>RTN4</i>      | chr2  | Body    | 1.08 | (0.55; 2.12) | 8.3E-01 |
| cg20641798 | <i>RTN4RL1</i>   | chr17 | TSS200  | 1.04 | (0.74; 1.46) | 8.3E-01 |
| cg23348014 | <i>COL1A2</i>    | chr7  | TSS1500 | 1.03 | (0.78; 1.37) | 8.3E-01 |
| cg04427566 | <i>RNU5E-1</i>   | chr5  | Body    | 0.94 | (0.56; 1.6)  | 8.3E-01 |
| cg03575798 | <i>WWOX</i>      | chr16 | Body    | 1.04 | (0.73; 1.49) | 8.3E-01 |
| cg21034183 | <i>TNRC6B</i>    | chr22 | 5'UTR   | 0.96 | (0.66; 1.4)  | 8.3E-01 |
| cg15340431 | <i>AKAP13</i>    | chr15 | Body    | 0.96 | (0.69; 1.35) | 8.3E-01 |
| cg09665520 | <i>CUX2</i>      | chr12 | Body    | 0.96 | (0.66; 1.39) | 8.3E-01 |
| cg21052960 | <i>TSHZ3</i>     | chr19 | Body    | 1.09 | (0.5; 2.34)  | 8.3E-01 |
| cg05990080 | <i>CTDSPL</i>    | chr3  | Body    | 0.96 | (0.65; 1.41) | 8.3E-01 |
| cg03784375 | <i>PTPRN2</i>    | chr7  | Body    | 1.04 | (0.75; 1.42) | 8.3E-01 |
| cg20956114 | <i>PTPRN2</i>    | chr7  | Body    | 1.04 | (0.71; 1.52) | 8.3E-01 |
| cg15244327 | <i>TNFRSF10D</i> | chr8  | TSS200  | 1.04 | (0.75; 1.44) | 8.3E-01 |
| cg12572748 | <i>FBXO34</i>    | chr14 | 5'UTR   | 0.96 | (0.63; 1.46) | 8.3E-01 |
| cg04415434 | <i>CHCHD6</i>    | chr3  | TSS200  | 1.03 | (0.77; 1.38) | 8.3E-01 |
| cg15972922 | <i>ATF7</i>      | chr12 | Body    | 0.96 | (0.69; 1.35) | 8.3E-01 |
| cg18099070 | <i>PTPRN2</i>    | chr7  | Body    | 1.05 | (0.69; 1.58) | 8.3E-01 |
| cg18051740 | <i>PTPRN2</i>    | chr7  | Body    | 1.03 | (0.76; 1.41) | 8.3E-01 |
| cg16803621 | <i>ARID1A</i>    | chr1  | Body    | 0.96 | (0.66; 1.4)  | 8.3E-01 |
| cg13493071 | <i>GNA12</i>     | chr7  | Body    | 1.04 | (0.74; 1.46) | 8.3E-01 |
| cg13558924 | <i>WWOX</i>      | chr16 | TSS200  | 1.04 | (0.75; 1.43) | 8.3E-01 |
| cg24848535 | <i>FBXO31</i>    | chr16 | Body    | 1.04 | (0.74; 1.46) | 8.3E-01 |
| cg24848535 | <i>FBXO31</i>    | chr16 | TSS200  | 1.04 | (0.74; 1.46) | 8.3E-01 |



|            |                  |       |         |      |              |         |
|------------|------------------|-------|---------|------|--------------|---------|
| cg00781633 | <i>CDH13</i>     | chr16 | 5'UTR   | 0.97 | (0.73; 1.29) | 8.3E-01 |
| cg00781633 | <i>CDH13</i>     | chr16 | Body    | 0.97 | (0.73; 1.29) | 8.3E-01 |
| cg01243538 | <i>SUGCT</i>     | chr7  | Body    | 1.04 | (0.72; 1.51) | 8.3E-01 |
| cg10254605 | <i>CHCHD6</i>    | chr3  | Body    | 1.03 | (0.76; 1.41) | 8.3E-01 |
| cg08376924 | <i>PTPRN2</i>    | chr7  | Body    | 0.97 | (0.7; 1.34)  | 8.3E-01 |
| cg16479386 | <i>PTPRN2</i>    | chr7  | Body    | 1.04 | (0.74; 1.45) | 8.3E-01 |
| cg03631078 | <i>ZBTB20</i>    | chr3  | 5'UTR   | 1.04 | (0.73; 1.48) | 8.3E-01 |
| cg16876348 | <i>TNFRSF10D</i> | chr8  | TSS1500 | 1.03 | (0.76; 1.4)  | 8.3E-01 |
| cg09894040 | <i>CHCHD6</i>    | chr3  | TSS200  | 0.97 | (0.71; 1.32) | 8.3E-01 |
| cg03181212 | <i>AKAP13</i>    | chr15 | 5'UTR   | 1.04 | (0.69; 1.58) | 8.3E-01 |
| cg20833161 | <i>CUX2</i>      | chr12 | Body    | 1.04 | (0.74; 1.44) | 8.4E-01 |
| cg06697151 | <i>ZBTB20</i>    | chr3  | TSS1500 | 0.96 | (0.68; 1.37) | 8.4E-01 |
| cg06697151 | <i>ZBTB20</i>    | chr3  | 5'UTR   | 0.96 | (0.68; 1.37) | 8.4E-01 |
| cg16518986 | <i>PTPRN2</i>    | chr7  | Body    | 1.04 | (0.73; 1.48) | 8.4E-01 |
| cg15179725 | <i>BRUNOL4</i>   | chr18 | TSS1500 | 0.97 | (0.69; 1.35) | 8.4E-01 |
| cg04360147 | <i>ARID1A</i>    | chr1  | TSS1500 | 1.03 | (0.78; 1.37) | 8.4E-01 |
| cg18943936 | <i>TNR</i>       | chr1  | Body    | 0.97 | (0.7; 1.34)  | 8.4E-01 |
| cg03250223 | <i>UBE2E2</i>    | chr3  | 5'UTR   | 0.95 | (0.61; 1.5)  | 8.4E-01 |
| cg27260886 | <i>RTN4RL2</i>   | chr11 | Body    | 0.96 | (0.64; 1.44) | 8.4E-01 |
| cg02236679 | <i>WWOX</i>      | chr16 | Body    | 0.96 | (0.69; 1.36) | 8.4E-01 |
| cg09583915 | <i>TAOK3</i>     | chr12 | Body    | 0.9  | (0.34; 2.38) | 8.4E-01 |
| cg13535663 | <i>POU2F1</i>    | chr1  | 5'UTR   | 1.03 | (0.76; 1.41) | 8.4E-01 |
| cg08988698 | <i>RTN4</i>      | chr2  | Body    | 0.96 | (0.66; 1.41) | 8.4E-01 |
| cg12745536 | <i>PTPRN2</i>    | chr7  | Body    | 1.03 | (0.75; 1.43) | 8.4E-01 |
| cg27508408 | <i>PTPRN2</i>    | chr7  | Body    | 1.04 | (0.71; 1.52) | 8.4E-01 |
| cg00029284 | <i>CUX2</i>      | chr12 | Body    | 1.04 | (0.69; 1.59) | 8.4E-01 |
| cg10368655 | <i>TAOK3</i>     | chr12 | Body    | 1.04 | (0.71; 1.51) | 8.4E-01 |
| cg12226306 | <i>ALCAM</i>     | chr3  | Body    | 1.03 | (0.75; 1.42) | 8.4E-01 |
| cg26884027 | <i>PTPRU</i>     | chr1  | Body    | 1.03 | (0.76; 1.4)  | 8.4E-01 |
| cg20918537 | <i>DMXL2</i>     | chr15 | Body    | 0.97 | (0.71; 1.32) | 8.4E-01 |
| cg11813690 | <i>CUX2</i>      | chr12 | Body    | 1.04 | (0.73; 1.48) | 8.4E-01 |
| cg15230900 | <i>PTPRN2</i>    | chr7  | Body    | 1.04 | (0.72; 1.5)  | 8.4E-01 |
| cg03391055 | <i>CSMD2</i>     | chr1  | Body    | 0.96 | (0.68; 1.37) | 8.4E-01 |
| cg25264630 | <i>PTPRN2</i>    | chr7  | Body    | 0.96 | (0.67; 1.38) | 8.4E-01 |
| cg06415900 | <i>TENM2</i>     | chr5  | Body    | 0.97 | (0.69; 1.36) | 8.4E-01 |
| cg05008825 | <i>COL1A2</i>    | chr7  | Body    | 1.03 | (0.75; 1.42) | 8.4E-01 |
| cg13338595 | <i>PTPRU</i>     | chr1  | TSS1500 | 0.97 | (0.69; 1.35) | 8.4E-01 |
| cg25626273 | <i>CUX2</i>      | chr12 | Body    | 0.95 | (0.59; 1.52) | 8.4E-01 |
| cg03472539 | <i>CREBBP</i>    | chr16 | Body    | 0.96 | (0.66; 1.39) | 8.4E-01 |
| cg20842326 | <i>PTPRN2</i>    | chr7  | Body    | 0.96 | (0.64; 1.44) | 8.4E-01 |
| cg26059287 | <i>PTPRN2</i>    | chr7  | Body    | 1.03 | (0.75; 1.43) | 8.4E-01 |
| cg05475530 | <i>ZBTB20</i>    | chr3  | Body    | 1.04 | (0.69; 1.57) | 8.4E-01 |
| cg05475530 | <i>ZBTB20</i>    | chr3  | 5'UTR   | 1.04 | (0.69; 1.57) | 8.4E-01 |
| cg24899209 | <i>ZFP91</i>     | chr11 | TSS200  | 1.03 | (0.77; 1.37) | 8.4E-01 |
| cg22988572 | <i>CTNND2</i>    | chr5  | Body    | 0.97 | (0.7; 1.33)  | 8.4E-01 |
| cg04014190 | <i>CUX2</i>      | chr12 | Body    | 0.9  | (0.34; 2.39) | 8.4E-01 |
| cg15571705 | <i>BARX2</i>     | chr11 | Body    | 0.96 | (0.63; 1.46) | 8.4E-01 |
| cg05296024 | <i>WWOX</i>      | chr16 | Body    | 0.95 | (0.61; 1.49) | 8.4E-01 |
| cg13017013 | <i>CHD6</i>      | chr20 | Body    | 1.03 | (0.75; 1.43) | 8.4E-01 |
| cg19026233 | <i>UNC80</i>     | chr2  | Body    | 0.97 | (0.7; 1.33)  | 8.4E-01 |
| cg08776627 | <i>MTCL1</i>     | chr18 | Body    | 1.05 | (0.66; 1.68) | 8.4E-01 |
| cg02744459 | <i>RECQL</i>     | chr12 | 1stExon | 0.97 | (0.72; 1.3)  | 8.4E-01 |
| cg02744459 | <i>GOLT1B</i>    | chr12 | TSS1500 | 0.97 | (0.72; 1.3)  | 8.4E-01 |
| cg02744459 | <i>RECQL</i>     | chr12 | 5'UTR   | 0.97 | (0.72; 1.3)  | 8.4E-01 |
| cg23334467 | <i>AKAP13</i>    | chr15 | Body    | 0.97 | (0.71; 1.31) | 8.4E-01 |
| cg06863310 | <i>WWOX</i>      | chr16 | Body    | 0.97 | (0.71; 1.31) | 8.4E-01 |
| cg19680441 | <i>PTPRN2</i>    | chr7  | Body    | 1.03 | (0.75; 1.44) | 8.4E-01 |
| cg23636419 | <i>FBXO31</i>    | chr16 | TSS1500 | 0.97 | (0.71; 1.33) | 8.4E-01 |
| cg11604519 | <i>PTPRN2</i>    | chr7  | Body    | 0.96 | (0.68; 1.37) | 8.4E-01 |
| cg18818282 | <i>CDH13</i>     | chr16 | 5'UTR   | 1.03 | (0.75; 1.42) | 8.4E-01 |
| cg18818282 | <i>CDH13</i>     | chr16 | Body    | 1.03 | (0.75; 1.42) | 8.4E-01 |



|            |         |       |         |      |              |         |
|------------|---------|-------|---------|------|--------------|---------|
| cg13181974 | MEIS2   | chr15 | Body    | 0.97 | (0.69; 1.35) | 8.4E-01 |
| cg09656639 | PTPRN2  | chr7  | Body    | 0.94 | (0.53; 1.68) | 8.4E-01 |
| cg05489332 | GNA12   | chr7  | Body    | 0.96 | (0.68; 1.38) | 8.4E-01 |
| cg05489332 | GNA12   | chr7  | TSS1500 | 0.96 | (0.68; 1.38) | 8.4E-01 |
| cg23873145 | TNRC6A  | chr16 | Body    | 0.95 | (0.55; 1.64) | 8.4E-01 |
| cg26732155 | MEIS2   | chr15 | Body    | 1.03 | (0.77; 1.37) | 8.4E-01 |
| cg12779445 | PTPRN2  | chr7  | Body    | 1.03 | (0.75; 1.42) | 8.4E-01 |
| cg24489561 | TENM2   | chr5  | Body    | 1.03 | (0.75; 1.43) | 8.4E-01 |
| cg23022034 | PTPRS   | chr19 | 5'UTR   | 0.97 | (0.71; 1.33) | 8.4E-01 |
| cg14624806 | CDH13   | chr16 | 5'UTR   | 0.97 | (0.72; 1.31) | 8.4E-01 |
| cg14624806 | CDH13   | chr16 | Body    | 0.97 | (0.72; 1.31) | 8.4E-01 |
| cg20764780 | PTPRN2  | chr7  | Body    | 1.03 | (0.76; 1.39) | 8.4E-01 |
| cg10953723 | CSMD2   | chr1  | Body    | 0.97 | (0.69; 1.36) | 8.4E-01 |
| cg18900012 | PTPRN2  | chr7  | Body    | 1.03 | (0.78; 1.35) | 8.4E-01 |
| cg13708055 | AKAP13  | chr15 | Body    | 0.96 | (0.62; 1.48) | 8.4E-01 |
| cg03339592 | TENM2   | chr5  | Body    | 1.04 | (0.71; 1.51) | 8.4E-01 |
| cg00409842 | AKAP13  | chr15 | Body    | 0.96 | (0.68; 1.38) | 8.4E-01 |
| cg12412575 | AKAP13  | chr15 | Body    | 0.95 | (0.55; 1.63) | 8.4E-01 |
| cg19126954 | PTPRN2  | chr7  | Body    | 0.96 | (0.67; 1.38) | 8.4E-01 |
| cg07070077 | ZBTB20  | chr3  | Body    | 1.03 | (0.74; 1.44) | 8.4E-01 |
| cg07070077 | ZBTB20  | chr3  | 5'UTR   | 1.03 | (0.74; 1.44) | 8.4E-01 |
| cg00543524 | TNRC6B  | chr22 | Body    | 1.04 | (0.71; 1.51) | 8.4E-01 |
| cg19241175 | CSMD2   | chr1  | Body    | 0.96 | (0.67; 1.38) | 8.4E-01 |
| cg05640346 | CNTNAP2 | chr7  | Body    | 0.97 | (0.72; 1.31) | 8.4E-01 |
| cg06694945 | CHD6    | chr20 | ExonBnd | 0.97 | (0.7; 1.34)  | 8.4E-01 |
| cg06694945 | CHD6    | chr20 | Body    | 0.97 | (0.7; 1.34)  | 8.4E-01 |
| cg26410016 | CDH13   | chr16 | Body    | 0.97 | (0.72; 1.31) | 8.4E-01 |
| cg02913089 | PDE8A   | chr15 | Body    | 1.04 | (0.71; 1.52) | 8.4E-01 |
| cg06747087 | PTPRN2  | chr7  | Body    | 1.03 | (0.73; 1.46) | 8.5E-01 |
| cg21584493 | PTPRN2  | chr7  | Body    | 0.97 | (0.72; 1.31) | 8.5E-01 |
| cg17408166 | MEX3A   | chr1  | TSS1500 | 0.96 | (0.65; 1.42) | 8.5E-01 |
| cg26783086 | CNTNAP2 | chr7  | Body    | 0.96 | (0.65; 1.42) | 8.5E-01 |
| cg00837594 | RTN4RL2 | chr11 | Body    | 1.08 | (0.5; 2.32)  | 8.5E-01 |
| cg21375490 | PTPRN2  | chr7  | Body    | 0.97 | (0.69; 1.35) | 8.5E-01 |
| cg24517837 | TENM2   | chr5  | Body    | 1.04 | (0.72; 1.49) | 8.5E-01 |
| cg17547972 | TNR     | chr1  | 5'UTR   | 0.97 | (0.7; 1.33)  | 8.5E-01 |
| cg20318829 | SGIP1   | chr1  | Body    | 0.97 | (0.71; 1.33) | 8.5E-01 |
| cg13835272 | SUGCT   | chr7  | Body    | 0.96 | (0.62; 1.49) | 8.5E-01 |
| cg06618686 | PTPRN2  | chr7  | Body    | 0.95 | (0.55; 1.62) | 8.5E-01 |
| cg19616687 | TENM2   | chr5  | Body    | 0.97 | (0.7; 1.34)  | 8.5E-01 |
| cg24007907 | WVOX    | chr16 | Body    | 0.95 | (0.59; 1.55) | 8.5E-01 |
| cg14850477 | DACH1   | chr13 | Body    | 0.96 | (0.65; 1.42) | 8.5E-01 |
| cg09789991 | BARX2   | chr11 | Body    | 0.96 | (0.61; 1.5)  | 8.5E-01 |
| cg04136699 | PTPRN2  | chr7  | Body    | 1.04 | (0.67; 1.62) | 8.5E-01 |
| cg03513850 | CUX2    | chr12 | Body    | 1.03 | (0.74; 1.44) | 8.5E-01 |
| cg12930683 | SUGCT   | chr7  | Body    | 1.05 | (0.62; 1.78) | 8.5E-01 |
| cg23574403 | DDHD2   | chr8  | 5'UTR   | 0.97 | (0.7; 1.34)  | 8.5E-01 |
| cg23574403 | DDHD2   | chr8  | TSS200  | 0.97 | (0.7; 1.34)  | 8.5E-01 |
| cg07410108 | TNR     | chr1  | Body    | 0.97 | (0.71; 1.33) | 8.5E-01 |
| cg10633479 | PTPRN2  | chr7  | Body    | 0.97 | (0.7; 1.34)  | 8.5E-01 |
| cg16686255 | SGIP1   | chr1  | Body    | 0.97 | (0.69; 1.36) | 8.5E-01 |
| cg05579861 | PTPRN2  | chr7  | Body    | 1.03 | (0.76; 1.4)  | 8.5E-01 |
| cg14168939 | CHFR    | chr12 | 3'UTR   | 0.97 | (0.7; 1.34)  | 8.5E-01 |
| cg26888153 | ELAVL4  | chr1  | TSS200  | 1.03 | (0.75; 1.42) | 8.5E-01 |
| cg26888153 | ELAVL4  | chr1  | Body    | 1.03 | (0.75; 1.42) | 8.5E-01 |
| cg14395444 | CACNA1C | chr12 | Body    | 1.04 | (0.7; 1.54)  | 8.5E-01 |
| cg10015051 | CDH11   | chr16 | 5'UTR   | 0.97 | (0.71; 1.33) | 8.5E-01 |
| cg15938905 | TNRC18  | chr7  | Body    | 1.03 | (0.73; 1.46) | 8.5E-01 |
| cg05152899 | DCUN1D4 | chr4  | TSS200  | 0.97 | (0.69; 1.35) | 8.5E-01 |
| cg05152899 | DCUN1D4 | chr4  | TSS1500 | 0.97 | (0.69; 1.35) | 8.5E-01 |
| cg27050818 | RECQL5  | chr17 | Body    | 0.96 | (0.65; 1.42) | 8.5E-01 |



|            |                    |       |         |      |              |         |
|------------|--------------------|-------|---------|------|--------------|---------|
| cg14908168 | <i>TNRC6A</i>      | chr16 | Body    | 0.97 | (0.69; 1.35) | 8.5E-01 |
| cg04216310 | <i>CTNND2</i>      | chr5  | Body    | 1.03 | (0.75; 1.41) | 8.5E-01 |
| cg17171920 | <i>MEIS2</i>       | chr15 | Body    | 0.97 | (0.71; 1.33) | 8.5E-01 |
| cg17705152 | <i>RTN4</i>        | chr2  | Body    | 1.05 | (0.63; 1.76) | 8.5E-01 |
| cg09123693 | <i>PTPRN2</i>      | chr7  | Body    | 0.97 | (0.71; 1.32) | 8.5E-01 |
| cg18939664 | <i>PTPRN2</i>      | chr7  | Body    | 0.97 | (0.7; 1.33)  | 8.5E-01 |
| cg10310310 | <i>PTPRN2</i>      | chr7  | Body    | 0.96 | (0.61; 1.5)  | 8.5E-01 |
| cg26228218 | <i>FBXO38</i>      | chr5  | 5'UTR   | 0.97 | (0.68; 1.37) | 8.5E-01 |
| cg15756917 | <i>CSMD2</i>       | chr1  | Body    | 1.04 | (0.68; 1.61) | 8.5E-01 |
| cg23161250 | <i>ELAVL4</i>      | chr1  | TSS1500 | 1.03 | (0.75; 1.41) | 8.5E-01 |
| cg23161250 | <i>ELAVL4</i>      | chr1  | Body    | 1.03 | (0.75; 1.41) | 8.5E-01 |
| cg01509920 | <i>RAP1B</i>       | chr12 | 5'UTR   | 0.96 | (0.65; 1.43) | 8.5E-01 |
| cg09239016 | <i>AKAP13</i>      | chr15 | Body    | 0.96 | (0.66; 1.4)  | 8.5E-01 |
| cg20156300 | <i>CDH13</i>       | chr16 | Body    | 0.97 | (0.69; 1.36) | 8.5E-01 |
| cg25000696 | <i>PTPRN2</i>      | chr7  | Body    | 0.97 | (0.68; 1.37) | 8.5E-01 |
| cg25264348 | <i>NOL4L</i>       | chr20 | Body    | 1.03 | (0.76; 1.4)  | 8.5E-01 |
| cg18396357 | <i>NRXN1</i>       | chr2  | Body    | 1.03 | (0.74; 1.43) | 8.5E-01 |
| cg02242372 | <i>TNFRSF11B</i>   | chr8  | Body    | 0.97 | (0.71; 1.33) | 8.5E-01 |
| cg16104636 | <i>CTNND2</i>      | chr5  | Body    | 1.03 | (0.77; 1.37) | 8.5E-01 |
| cg16104636 | <i>CTNND2</i>      | chr5  | 5'UTR   | 1.03 | (0.77; 1.37) | 8.5E-01 |
| cg01123250 | <i>UNC80</i>       | chr2  | Body    | 1.03 | (0.73; 1.45) | 8.5E-01 |
| cg04228235 | <i>PTPRN2</i>      | chr7  | Body    | 0.97 | (0.7; 1.34)  | 8.5E-01 |
| cg09812963 | <i>TNRC18</i>      | chr7  | Body    | 1.03 | (0.74; 1.45) | 8.5E-01 |
| cg05550893 | <i>RTN4RL1</i>     | chr17 | Body    | 1.04 | (0.7; 1.53)  | 8.5E-01 |
| cg23830653 | <i>PTPRN2</i>      | chr7  | Body    | 1.03 | (0.77; 1.37) | 8.5E-01 |
| cg26488808 | <i>SUSD4</i>       | chr1  | Body    | 1.03 | (0.73; 1.46) | 8.5E-01 |
| cg02515354 | <i>CNTNAP2</i>     | chr7  | Body    | 1.03 | (0.77; 1.38) | 8.5E-01 |
| cg11207515 | <i>CNTNAP2</i>     | chr7  | Body    | 1.03 | (0.72; 1.48) | 8.5E-01 |
| cg24043604 | <i>CACNA1C</i>     | chr12 | Body    | 0.97 | (0.66; 1.4)  | 8.5E-01 |
| cg18846845 | <i>CACNA1C-AS4</i> | chr12 | TSS1500 | 0.97 | (0.71; 1.33) | 8.5E-01 |
| cg18846845 | <i>CACNA1C</i>     | chr12 | Body    | 0.97 | (0.71; 1.33) | 8.5E-01 |
| cg08487696 | <i>SMARCD3</i>     | chr7  | TSS200  | 0.97 | (0.7; 1.35)  | 8.5E-01 |
| cg08487696 | <i>SMARCD3</i>     | chr7  | Body    | 0.97 | (0.7; 1.35)  | 8.5E-01 |
| cg06188198 | <i>PTPRN2</i>      | chr7  | Body    | 1.03 | (0.74; 1.45) | 8.5E-01 |
| cg25109663 | <i>ZBTB20</i>      | chr3  | TSS1500 | 0.97 | (0.67; 1.4)  | 8.5E-01 |
| cg25109663 | <i>ZBTB20</i>      | chr3  | 5'UTR   | 0.97 | (0.67; 1.4)  | 8.5E-01 |
| cg09175915 | <i>PEX14</i>       | chr1  | Body    | 1.03 | (0.74; 1.44) | 8.5E-01 |
| cg10907484 | <i>AKAP3</i>       | chr12 | 5'UTR   | 1.03 | (0.78; 1.35) | 8.5E-01 |
| cg10907484 | <i>NDUFA9</i>      | chr12 | TSS1500 | 1.03 | (0.78; 1.35) | 8.5E-01 |
| cg01255527 | <i>FBXO32</i>      | chr8  | 5'UTR   | 1.04 | (0.71; 1.52) | 8.5E-01 |
| cg01255527 | <i>FBXO32</i>      | chr8  | Body    | 1.04 | (0.71; 1.52) | 8.5E-01 |
| cg00135038 | <i>TNRC18</i>      | chr7  | Body    | 1.03 | (0.72; 1.48) | 8.5E-01 |
| cg10804726 | <i>DNAI2</i>       | chr17 | 5'UTR   | 1.03 | (0.73; 1.45) | 8.5E-01 |
| cg10804726 | <i>DNAI2</i>       | chr17 | 1stExon | 1.03 | (0.73; 1.45) | 8.5E-01 |
| cg27201750 | <i>CACNA1C</i>     | chr12 | Body    | 1.04 | (0.66; 1.66) | 8.5E-01 |
| cg05319711 | <i>PTPRN2</i>      | chr7  | Body    | 0.97 | (0.71; 1.32) | 8.5E-01 |
| cg06580959 | <i>FBXO36</i>      | chr2  | Body    | 1.03 | (0.77; 1.38) | 8.5E-01 |
| cg21273703 | <i>CHFR</i>        | chr12 | TSS200  | 0.97 | (0.7; 1.35)  | 8.5E-01 |
| cg07910560 | <i>PTPRN2</i>      | chr7  | Body    | 0.97 | (0.71; 1.32) | 8.5E-01 |
| cg13889541 | <i>CHFR</i>        | chr12 | Body    | 1.03 | (0.76; 1.4)  | 8.6E-01 |
| cg01638592 | <i>CUX2</i>        | chr12 | Body    | 1.03 | (0.73; 1.45) | 8.6E-01 |
| cg16951941 | <i>FBXO36</i>      | chr2  | TSS1500 | 0.97 | (0.71; 1.32) | 8.6E-01 |
| cg18075396 | <i>SUGCT</i>       | chr7  | Body    | 1.03 | (0.73; 1.47) | 8.6E-01 |
| cg18202449 | <i>ELAVL4</i>      | chr1  | TSS200  | 1.04 | (0.67; 1.61) | 8.6E-01 |
| cg12247968 | <i>DACH1</i>       | chr13 | TSS1500 | 0.96 | (0.64; 1.46) | 8.6E-01 |
| cg00844901 | <i>ZBTB20</i>      | chr3  | TSS1500 | 1.03 | (0.74; 1.44) | 8.6E-01 |
| cg00844901 | <i>ZBTB20</i>      | chr3  | Body    | 1.03 | (0.74; 1.44) | 8.6E-01 |
| cg00844901 | <i>ZBTB20</i>      | chr3  | 5'UTR   | 1.03 | (0.74; 1.44) | 8.6E-01 |
| cg17625381 | <i>CPEB1</i>       | chr15 | TSS200  | 1.03 | (0.72; 1.48) | 8.6E-01 |
| cg17625381 | <i>CPEB1</i>       | chr15 | TSS1500 | 1.03 | (0.72; 1.48) | 8.6E-01 |
| cg23803311 | <i>FBXO38</i>      | chr5  | TSS1500 | 1.03 | (0.73; 1.45) | 8.6E-01 |



|            |             |       |         |      |              |         |
|------------|-------------|-------|---------|------|--------------|---------|
| cg07633256 | TENM2       | chr5  | Body    | 1.03 | (0.74; 1.43) | 8.6E-01 |
| cg21605122 | TENM2       | chr5  | Body    | 0.97 | (0.67; 1.4)  | 8.6E-01 |
| cg27014435 | PTPRN2      | chr7  | Body    | 0.97 | (0.71; 1.34) | 8.6E-01 |
| cg02098414 | PHACTR1     | chr6  | Body    | 1.07 | (0.5; 2.3)   | 8.6E-01 |
| cg00884606 | NOL4        | chr18 | TSS200  | 1.05 | (0.65; 1.69) | 8.6E-01 |
| cg06963346 | PTPRN2      | chr7  | Body    | 0.97 | (0.71; 1.33) | 8.6E-01 |
| cg04404540 | DNAI2       | chr17 | 5'UTR   | 0.97 | (0.68; 1.37) | 8.6E-01 |
| cg04404540 | DNAI2       | chr17 | 1stExon | 0.97 | (0.68; 1.37) | 8.6E-01 |
| cg09096054 | DACH1       | chr13 | Body    | 1.04 | (0.67; 1.61) | 8.6E-01 |
| cg19612376 | CUX2        | chr12 | Body    | 0.97 | (0.69; 1.36) | 8.6E-01 |
| cg19929166 | DCUN1D4     | chr4  | TSS1500 | 1.03 | (0.75; 1.42) | 8.6E-01 |
| cg26281685 | NRXN1       | chr2  | TSS1500 | 1.03 | (0.74; 1.42) | 8.6E-01 |
| cg01344056 | CDH13       | chr16 | Body    | 1.03 | (0.77; 1.37) | 8.6E-01 |
| cg01435574 | BARX2       | chr11 | TSS200  | 0.96 | (0.6; 1.52)  | 8.6E-01 |
| cg16235891 | PTPRN2      | chr7  | Body    | 0.97 | (0.71; 1.33) | 8.6E-01 |
| cg20914464 | NOL4        | chr18 | TSS1500 | 0.96 | (0.58; 1.58) | 8.6E-01 |
| cg24632458 | ATF7        | chr12 | Body    | 0.97 | (0.72; 1.32) | 8.6E-01 |
| cg26911948 | CACNA1C-IT2 | chr12 | TSS1500 | 1.03 | (0.78; 1.35) | 8.6E-01 |
| cg21910390 | DCUN1D4     | chr4  | Body    | 0.97 | (0.71; 1.32) | 8.6E-01 |
| cg05124021 | PTPRN2      | chr7  | Body    | 0.97 | (0.72; 1.31) | 8.6E-01 |
| cg03530683 | SMARCD3     | chr7  | Body    | 1.03 | (0.75; 1.42) | 8.6E-01 |
| cg00338702 | CHFR        | chr12 | Body    | 1.03 | (0.73; 1.45) | 8.6E-01 |
| cg07032987 | PTPRN2      | chr7  | Body    | 0.97 | (0.72; 1.31) | 8.6E-01 |
| cg15688888 | ERI3        | chr1  | Body    | 1.04 | (0.67; 1.63) | 8.6E-01 |
| cg04256065 | TNRC6C      | chr17 | 3'UTR   | 1.04 | (0.67; 1.61) | 8.6E-01 |
| cg25052180 | GOLT1B      | chr12 | 5'UTR   | 1.03 | (0.73; 1.46) | 8.6E-01 |
| cg25052180 | GOLT1B      | chr12 | 1stExon | 1.03 | (0.73; 1.46) | 8.6E-01 |
| cg25052180 | RECQL       | chr12 | TSS200  | 1.03 | (0.73; 1.46) | 8.6E-01 |
| cg01944450 | RTN4R       | chr22 | Body    | 0.96 | (0.64; 1.45) | 8.6E-01 |
| cg15902390 | MEIS2       | chr15 | Body    | 0.97 | (0.71; 1.34) | 8.6E-01 |
| cg26565719 | CPEB1       | chr15 | Body    | 1.03 | (0.72; 1.49) | 8.6E-01 |
| cg20490175 | CACNA1C     | chr12 | Body    | 0.97 | (0.68; 1.38) | 8.6E-01 |
| cg04496810 | CACNA1C     | chr12 | TSS200  | 1.03 | (0.74; 1.44) | 8.6E-01 |
| cg07491199 | PTPRN2      | chr7  | Body    | 1.03 | (0.76; 1.4)  | 8.6E-01 |
| cg16824225 | TENM2       | chr5  | Body    | 0.97 | (0.68; 1.38) | 8.6E-01 |
| cg24402935 | NRXN1       | chr2  | Body    | 0.97 | (0.69; 1.36) | 8.6E-01 |
| cg13701249 | CHD6        | chr20 | TSS1500 | 1.03 | (0.73; 1.47) | 8.6E-01 |
| cg08457620 | RTN4RL1     | chr17 | Body    | 1.03 | (0.75; 1.41) | 8.6E-01 |
| cg09377301 | PTPRN2      | chr7  | Body    | 1.03 | (0.75; 1.42) | 8.6E-01 |
| cg12589140 | CUX2        | chr12 | Body    | 0.97 | (0.71; 1.32) | 8.6E-01 |
| cg25601319 | ARID1A      | chr1  | TSS1500 | 1.03 | (0.74; 1.44) | 8.6E-01 |
| cg01991687 | PTPRS       | chr19 | 5'UTR   | 1.03 | (0.7; 1.52)  | 8.6E-01 |
| cg15827617 | RNU5E-1     | chr5  | Body    | 1.03 | (0.75; 1.41) | 8.6E-01 |
| cg05965015 | TNR         | chr1  | 5'UTR   | 1.03 | (0.75; 1.41) | 8.6E-01 |
| cg14744741 | TNRC6A      | chr16 | Body    | 1.03 | (0.74; 1.44) | 8.6E-01 |
| cg03902160 | PTPRU       | chr1  | Body    | 0.97 | (0.72; 1.32) | 8.6E-01 |
| cg09714912 | CHD6        | chr20 | Body    | 0.97 | (0.72; 1.32) | 8.6E-01 |
| cg19147944 | FSTL1       | chr3  | Body    | 1.03 | (0.71; 1.51) | 8.6E-01 |
| cg02618485 | PTPRS       | chr19 | TSS1500 | 0.97 | (0.71; 1.33) | 8.6E-01 |
| cg08545213 | CTDSPL      | chr3  | Body    | 1.03 | (0.73; 1.45) | 8.6E-01 |
| cg06299997 | COL1A2      | chr7  | TSS1500 | 1.03 | (0.76; 1.39) | 8.6E-01 |
| cg01142212 | PHACTR1     | chr6  | Body    | 0.97 | (0.7; 1.35)  | 8.6E-01 |
| cg12647030 | FBXO38      | chr5  | TSS200  | 1.03 | (0.75; 1.4)  | 8.6E-01 |
| cg20857275 | TNRC6C      | chr17 | 5'UTR   | 1.06 | (0.56; 2.01) | 8.6E-01 |
| cg26026297 | ATP8A1      | chr4  | Body    | 0.97 | (0.67; 1.4)  | 8.6E-01 |
| cg09920531 | PTPRN2      | chr7  | Body    | 1.03 | (0.74; 1.43) | 8.6E-01 |
| cg00004257 | CSMD2       | chr1  | Body    | 1.03 | (0.75; 1.4)  | 8.6E-01 |
| cg08832817 | EIF2S1      | chr14 | TSS1500 | 1.03 | (0.75; 1.42) | 8.6E-01 |
| cg06610464 | CHD6        | chr20 | 5'UTR   | 1.03 | (0.72; 1.49) | 8.6E-01 |
| cg14789524 | WWOX        | chr16 | Body    | 0.96 | (0.59; 1.57) | 8.6E-01 |
| cg09270525 | PTPRN2      | chr7  | Body    | 0.97 | (0.69; 1.37) | 8.6E-01 |



|            |          |       |         |      |              |         |
|------------|----------|-------|---------|------|--------------|---------|
| cg01902081 | WWOX     | chr16 | Body    | 0.97 | (0.69; 1.37) | 8.6E-01 |
| cg07663813 | ZNF704   | chr8  | 5'UTR   | 1.03 | (0.75; 1.41) | 8.6E-01 |
| cg23236908 | FBXO34   | chr14 | 3'UTR   | 1.03 | (0.75; 1.41) | 8.7E-01 |
| cg14268784 | MBD5     | chr2  | 5'UTR   | 1.04 | (0.69; 1.56) | 8.7E-01 |
| cg15141267 | RTN4RL1  | chr17 | Body    | 0.96 | (0.64; 1.46) | 8.7E-01 |
| cg05064673 | PTPRU    | chr1  | TSS1500 | 0.97 | (0.71; 1.33) | 8.7E-01 |
| cg04274883 | PHACTR1  | chr6  | Body    | 1.03 | (0.74; 1.44) | 8.7E-01 |
| cg13912714 | AKAP13   | chr15 | Body    | 0.93 | (0.38; 2.25) | 8.7E-01 |
| cg18242139 | ELAVL4   | chr1  | 1stExon | 1.03 | (0.75; 1.41) | 8.7E-01 |
| cg18242139 | ELAVL4   | chr1  | Body    | 1.03 | (0.75; 1.41) | 8.7E-01 |
| cg18242139 | ELAVL4   | chr1  | 5'UTR   | 1.03 | (0.75; 1.41) | 8.7E-01 |
| cg25161425 | TENM2    | chr5  | Body    | 1.03 | (0.72; 1.48) | 8.7E-01 |
| cg09589586 | TNRC6A   | chr16 | Body    | 1.03 | (0.74; 1.44) | 8.7E-01 |
| cg09845387 | PDE8A    | chr15 | 5'UTR   | 0.97 | (0.68; 1.38) | 8.7E-01 |
| cg09845387 | PDE8A    | chr15 | Body    | 0.97 | (0.68; 1.38) | 8.7E-01 |
| cg25449441 | PTPRN2   | chr7  | Body    | 1.03 | (0.74; 1.42) | 8.7E-01 |
| cg02876293 | PTPRN2   | chr7  | Body    | 0.97 | (0.67; 1.4)  | 8.7E-01 |
| cg21600563 | FBXO33   | chr14 | TSS200  | 1.03 | (0.75; 1.41) | 8.7E-01 |
| cg12364136 | PTPRN2   | chr7  | Body    | 1.06 | (0.53; 2.11) | 8.7E-01 |
| cg26636917 | CNTNAP2  | chr7  | Body    | 0.97 | (0.68; 1.39) | 8.7E-01 |
| cg09100286 | CTNND2   | chr5  | Body    | 0.96 | (0.6; 1.54)  | 8.7E-01 |
| cg09100286 | CTNND2   | chr5  | 5'UTR   | 0.96 | (0.6; 1.54)  | 8.7E-01 |
| cg04114351 | CUX2     | chr12 | Body    | 1.03 | (0.76; 1.39) | 8.7E-01 |
| cg13666677 | CEP350   | chr1  | TSS200  | 1.03 | (0.74; 1.42) | 8.7E-01 |
| cg19140630 | NDUFA9   | chr12 | Body    | 0.97 | (0.69; 1.37) | 8.7E-01 |
| cg19140630 | AKAP3    | chr12 | TSS1500 | 0.97 | (0.69; 1.37) | 8.7E-01 |
| cg06948658 | CACNA1C  | chr12 | Body    | 0.97 | (0.65; 1.44) | 8.7E-01 |
| cg03012452 | PHACTR1  | chr6  | Body    | 1.03 | (0.73; 1.45) | 8.7E-01 |
| cg01228469 | AKAP13   | chr15 | TSS1500 | 1.03 | (0.75; 1.4)  | 8.7E-01 |
| cg23285459 | GNA12    | chr7  | Body    | 1.03 | (0.75; 1.41) | 8.7E-01 |
| cg12908952 | POU2F1   | chr1  | 5'UTR   | 1.03 | (0.71; 1.49) | 8.7E-01 |
| cg20279950 | AKAP13   | chr15 | Body    | 0.97 | (0.65; 1.44) | 8.7E-01 |
| cg18433423 | CDH13    | chr16 | 5'UTR   | 0.96 | (0.63; 1.48) | 8.7E-01 |
| cg18433423 | CDH13    | chr16 | Body    | 0.96 | (0.63; 1.48) | 8.7E-01 |
| cg18120999 | TENM2    | chr5  | Body    | 1.03 | (0.75; 1.4)  | 8.7E-01 |
| cg21904851 | TNR      | chr1  | Body    | 0.97 | (0.72; 1.32) | 8.7E-01 |
| cg24194698 | WAC      | chr10 | Body    | 1.03 | (0.71; 1.5)  | 8.7E-01 |
| cg24636969 | ZNF704   | chr8  | TSS200  | 1.03 | (0.74; 1.43) | 8.7E-01 |
| cg19370097 | ZBTB20   | chr3  | TSS1500 | 0.97 | (0.68; 1.38) | 8.7E-01 |
| cg19370097 | ZBTB20   | chr3  | Body    | 0.97 | (0.68; 1.38) | 8.7E-01 |
| cg19370097 | ZBTB20   | chr3  | 5'UTR   | 0.97 | (0.68; 1.38) | 8.7E-01 |
| cg19370097 | ZBTB20   | chr3  | TSS200  | 0.97 | (0.68; 1.38) | 8.7E-01 |
| cg14281315 | POU2F1   | chr1  | Body    | 1.04 | (0.65; 1.67) | 8.7E-01 |
| cg00292636 | SGIP1    | chr1  | Body    | 1.03 | (0.72; 1.46) | 8.7E-01 |
| cg07355688 | BARX2    | chr11 | Body    | 1.03 | (0.76; 1.38) | 8.7E-01 |
| cg11632321 | PTPRN2   | chr7  | Body    | 0.97 | (0.72; 1.33) | 8.7E-01 |
| cg06365577 | CREBBP   | chr16 | Body    | 0.97 | (0.7; 1.35)  | 8.7E-01 |
| cg24787443 | FBXO38   | chr5  | Body    | 0.97 | (0.67; 1.4)  | 8.7E-01 |
| cg09319435 | PEX14    | chr1  | Body    | 1.02 | (0.77; 1.36) | 8.7E-01 |
| cg24782459 | FSTL1    | chr3  | Body    | 1.03 | (0.73; 1.45) | 8.7E-01 |
| cg00419990 | PTPRN2   | chr7  | Body    | 1.03 | (0.75; 1.42) | 8.7E-01 |
| cg11271415 | FBXO32   | chr8  | TSS1500 | 0.97 | (0.71; 1.33) | 8.7E-01 |
| cg11271415 | FBXO32   | chr8  | Body    | 0.97 | (0.71; 1.33) | 8.7E-01 |
| cg14615152 | CSMD2    | chr1  | Body    | 1.06 | (0.54; 2.07) | 8.7E-01 |
| cg04126852 | POU2F1   | chr1  | TSS1500 | 1.03 | (0.75; 1.41) | 8.7E-01 |
| cg02692405 | TNFRSF19 | chr13 | 5'UTR   | 1.03 | (0.71; 1.5)  | 8.7E-01 |
| cg02692405 | TNFRSF19 | chr13 | TSS1500 | 1.03 | (0.71; 1.5)  | 8.7E-01 |
| cg09337043 | PTPRN2   | chr7  | Body    | 0.98 | (0.72; 1.32) | 8.7E-01 |
| cg27324698 | PTPRN2   | chr7  | Body    | 0.97 | (0.69; 1.37) | 8.7E-01 |
| cg23186959 | MEIS2    | chr15 | 5'UTR   | 0.97 | (0.69; 1.36) | 8.7E-01 |
| cg23186959 | MEIS2    | chr15 | 1stExon | 0.97 | (0.69; 1.36) | 8.7E-01 |



|            |           |       |         |      |              |         |
|------------|-----------|-------|---------|------|--------------|---------|
| cg23186959 | MEIS2     | chr15 | Body    | 0.97 | (0.69; 1.36) | 8.7E-01 |
| cg23186959 | MEIS2     | chr15 | TSS200  | 0.97 | (0.69; 1.36) | 8.7E-01 |
| cg23186959 | MEIS2     | chr15 | TSS1500 | 0.97 | (0.69; 1.36) | 8.7E-01 |
| cg09282805 | PTPRS     | chr19 | 5'UTR   | 0.96 | (0.62; 1.51) | 8.7E-01 |
| cg15064868 | PHACTR1   | chr6  | Body    | 0.97 | (0.69; 1.37) | 8.7E-01 |
| cg23747731 | TNR       | chr1  | 5'UTR   | 1.03 | (0.72; 1.47) | 8.7E-01 |
| cg25575079 | EIF2S1    | chr14 | 5'UTR   | 0.97 | (0.7; 1.35)  | 8.7E-01 |
| cg00152838 | TNRC6A    | chr16 | Body    | 0.98 | (0.72; 1.32) | 8.7E-01 |
| cg07849460 | PTPRN2    | chr7  | Body    | 1.03 | (0.73; 1.46) | 8.7E-01 |
| cg22648638 | MTCL1     | chr18 | Body    | 0.95 | (0.5; 1.81)  | 8.7E-01 |
| cg20457580 | NOL4L     | chr20 | Body    | 0.96 | (0.62; 1.5)  | 8.7E-01 |
| cg11076181 | EIF2S1    | chr14 | 5'UTR   | 1.04 | (0.63; 1.72) | 8.7E-01 |
| cg17167790 | PTPRN2    | chr7  | Body    | 0.97 | (0.65; 1.44) | 8.7E-01 |
| cg06527535 | PTPRN2    | chr7  | Body    | 1.03 | (0.74; 1.42) | 8.7E-01 |
| cg18072439 | CTDSP2    | chr12 | Body    | 1.03 | (0.72; 1.48) | 8.7E-01 |
| cg18048562 | RTN4RL2   | chr11 | Body    | 1.06 | (0.5; 2.27)  | 8.7E-01 |
| cg26254667 | TNFRSF1A  | chr12 | TSS1500 | 0.98 | (0.73; 1.31) | 8.7E-01 |
| cg26221631 | BARX2     | chr11 | 1stExon | 0.97 | (0.68; 1.38) | 8.7E-01 |
| cg00325390 | TNRC18    | chr7  | Body    | 1.03 | (0.7; 1.52)  | 8.7E-01 |
| cg19200285 | CACNA1C   | chr12 | 3'UTR   | 0.97 | (0.71; 1.33) | 8.7E-01 |
| cg27317842 | TNFRSF19  | chr13 | 5'UTR   | 1.03 | (0.7; 1.52)  | 8.7E-01 |
| cg27317842 | TNFRSF19  | chr13 | Body    | 1.03 | (0.7; 1.52)  | 8.7E-01 |
| cg27549963 | ATF7      | chr12 | Body    | 0.97 | (0.69; 1.38) | 8.7E-01 |
| cg24240077 | C11orf67  | chr11 | Body    | 0.97 | (0.66; 1.43) | 8.7E-01 |
| cg09473510 | MTNR1A    | chr4  | TSS200  | 0.96 | (0.59; 1.56) | 8.7E-01 |
| cg04437233 | RECQL5    | chr17 | Body    | 0.97 | (0.69; 1.37) | 8.7E-01 |
| cg00285941 | UNC80     | chr2  | Body    | 1.03 | (0.74; 1.43) | 8.7E-01 |
| cg13537240 | CACNA1C   | chr12 | Body    | 1.04 | (0.65; 1.65) | 8.7E-01 |
| cg26337322 | TNRC6B    | chr22 | Body    | 1.04 | (0.63; 1.72) | 8.7E-01 |
| cg26337322 | TNRC6B    | chr22 | TSS1500 | 1.04 | (0.63; 1.72) | 8.7E-01 |
| cg24996491 | PTPRN2    | chr7  | Body    | 0.97 | (0.69; 1.36) | 8.7E-01 |
| cg25306499 | PTPRS     | chr19 | 5'UTR   | 1.02 | (0.76; 1.38) | 8.7E-01 |
| cg13076784 | FBXO11    | chr2  | Body    | 1.04 | (0.68; 1.59) | 8.7E-01 |
| cg02187307 | TNR       | chr1  | 5'UTR   | 1.03 | (0.71; 1.5)  | 8.7E-01 |
| cg01388498 | FBXO31    | chr16 | TSS1500 | 1.03 | (0.72; 1.48) | 8.7E-01 |
| cg15598946 | WVOX      | chr16 | Body    | 1.03 | (0.74; 1.43) | 8.7E-01 |
| cg19655675 | ZBTB20    | chr3  | TSS1500 | 1.02 | (0.76; 1.39) | 8.7E-01 |
| cg19655675 | ZBTB20    | chr3  | Body    | 1.02 | (0.76; 1.39) | 8.7E-01 |
| cg19655675 | ZBTB20    | chr3  | 5'UTR   | 1.02 | (0.76; 1.39) | 8.7E-01 |
| cg08689556 | WVOX      | chr16 | Body    | 1.02 | (0.77; 1.35) | 8.7E-01 |
| cg27451424 | CDH13     | chr16 | Body    | 0.97 | (0.69; 1.38) | 8.7E-01 |
| cg02868521 | PTPRN2    | chr7  | Body    | 0.96 | (0.61; 1.52) | 8.7E-01 |
| cg22831949 | PTPRN2    | chr7  | Body    | 0.98 | (0.75; 1.28) | 8.8E-01 |
| cg03015144 | ZBTB20    | chr3  | Body    | 1.03 | (0.74; 1.43) | 8.8E-01 |
| cg16753420 | PTPRN2    | chr7  | Body    | 1.03 | (0.73; 1.45) | 8.8E-01 |
| cg03091751 | SMARCD3   | chr7  | Body    | 1.03 | (0.73; 1.44) | 8.8E-01 |
| cg03891302 | PHACTR1   | chr6  | Body    | 0.97 | (0.69; 1.37) | 8.8E-01 |
| cg05707324 | SUSD4     | chr1  | Body    | 1.03 | (0.75; 1.41) | 8.8E-01 |
| cg10844712 | TAOK3     | chr12 | Body    | 0.97 | (0.62; 1.51) | 8.8E-01 |
| cg24486540 | SUSD4     | chr1  | Body    | 0.97 | (0.7; 1.35)  | 8.8E-01 |
| cg15919857 | PTPRN2    | chr7  | Body    | 0.98 | (0.72; 1.32) | 8.8E-01 |
| cg03088446 | CTNND2    | chr5  | Body    | 0.97 | (0.64; 1.45) | 8.8E-01 |
| cg03088446 | CTNND2    | chr5  | 5'UTR   | 0.97 | (0.64; 1.45) | 8.8E-01 |
| cg27066321 | PEX14     | chr1  | TSS1500 | 0.97 | (0.71; 1.35) | 8.8E-01 |
| cg24518017 | ELAVL4    | chr1  | TSS1500 | 1.03 | (0.73; 1.44) | 8.8E-01 |
| cg24518017 | ELAVL4    | chr1  | Body    | 1.03 | (0.73; 1.44) | 8.8E-01 |
| cg14015044 | TNFRSF10C | chr8  | 5'UTR   | 0.97 | (0.68; 1.39) | 8.8E-01 |
| cg14015044 | TNFRSF10C | chr8  | 1stExon | 0.97 | (0.68; 1.39) | 8.8E-01 |
| cg06578832 | NRXN1     | chr2  | Body    | 0.97 | (0.68; 1.39) | 8.8E-01 |
| cg04727043 | PTPRU     | chr1  | Body    | 1.04 | (0.64; 1.7)  | 8.8E-01 |
| cg19658444 | TNRC18    | chr7  | Body    | 0.97 | (0.65; 1.45) | 8.8E-01 |



|            |           |       |         |      |              |         |
|------------|-----------|-------|---------|------|--------------|---------|
| cg08844988 | TNRC6A    | chr16 | 1stExon | 0.97 | (0.64; 1.46) | 8.8E-01 |
| cg08844988 | TNRC6A    | chr16 | 5'UTR   | 0.97 | (0.64; 1.46) | 8.8E-01 |
| cg04184836 | CPEB1     | chr15 | 1stExon | 0.98 | (0.71; 1.34) | 8.8E-01 |
| cg04184836 | CPEB1     | chr15 | 5'UTR   | 0.98 | (0.71; 1.34) | 8.8E-01 |
| cg22321810 | COL5A2    | chr2  | TSS1500 | 0.97 | (0.7; 1.36)  | 8.8E-01 |
| cg01294338 | PTPRN2    | chr7  | Body    | 1.03 | (0.73; 1.44) | 8.8E-01 |
| cg17964750 | TENM2     | chr5  | Body    | 1.03 | (0.71; 1.48) | 8.8E-01 |
| cg16861508 | TNFRSF10B | chr8  | TSS1500 | 0.98 | (0.73; 1.31) | 8.8E-01 |
| cg25174264 | TNRC6B    | chr22 | Body    | 1.03 | (0.74; 1.42) | 8.8E-01 |
| cg07267600 | CACNA1C   | chr12 | Body    | 1.04 | (0.64; 1.68) | 8.8E-01 |
| cg25618597 | CHFR      | chr12 | Body    | 0.97 | (0.68; 1.38) | 8.8E-01 |
| cg07516702 | PTPRS     | chr19 | Body    | 1.03 | (0.72; 1.47) | 8.8E-01 |
| cg04781638 | CPEB1     | chr15 | Body    | 1.04 | (0.62; 1.74) | 8.8E-01 |
| cg04781638 | CPEB1     | chr15 | TSS1500 | 1.04 | (0.62; 1.74) | 8.8E-01 |
| cg19271013 | WWOX      | chr16 | TSS1500 | 1.03 | (0.7; 1.52)  | 8.8E-01 |
| cg18843944 | PTPRN2    | chr7  | Body    | 1.03 | (0.75; 1.41) | 8.8E-01 |
| cg06822340 | CNTNAP2   | chr7  | Body    | 1.02 | (0.75; 1.39) | 8.8E-01 |
| cg15938090 | PEX14     | chr1  | Body    | 0.97 | (0.66; 1.42) | 8.8E-01 |
| cg27655246 | TNR       | chr1  | 5'UTR   | 0.97 | (0.69; 1.37) | 8.8E-01 |
| cg17022244 | PTPRN2    | chr7  | Body    | 0.98 | (0.71; 1.34) | 8.8E-01 |
| cg10767260 | CTNND2    | chr5  | Body    | 0.97 | (0.7; 1.36)  | 8.8E-01 |
| cg10767260 | CTNND2    | chr5  | 5'UTR   | 0.97 | (0.7; 1.36)  | 8.8E-01 |
| cg08695855 | COL1A2    | chr7  | TSS200  | 1.03 | (0.72; 1.46) | 8.8E-01 |
| cg16013919 | PTPRN2    | chr7  | Body    | 1.03 | (0.74; 1.43) | 8.8E-01 |
| cg23696212 | ATF7      | chr12 | TSS1500 | 0.97 | (0.67; 1.41) | 8.8E-01 |
| cg01707275 | PHACTR1   | chr6  | Body    | 1.03 | (0.73; 1.45) | 8.8E-01 |
| cg01901654 | PTPRN2    | chr7  | Body    | 0.98 | (0.72; 1.32) | 8.8E-01 |
| cg22881266 | PTPRN2    | chr7  | Body    | 0.97 | (0.63; 1.49) | 8.8E-01 |
| cg12980549 | PTPRN2    | chr7  | Body    | 1.02 | (0.76; 1.37) | 8.8E-01 |
| cg25354206 | PTPRN2    | chr7  | Body    | 1.06 | (0.47; 2.42) | 8.8E-01 |
| cg16574154 | PEX14     | chr1  | Body    | 1.03 | (0.73; 1.43) | 8.8E-01 |
| cg26271086 | FBXO33    | chr14 | 5'UTR   | 1.03 | (0.74; 1.42) | 8.8E-01 |
| cg26271086 | FBXO33    | chr14 | 1stExon | 1.03 | (0.74; 1.42) | 8.8E-01 |
| cg24786530 | AKAP3     | chr12 | TSS200  | 0.98 | (0.71; 1.34) | 8.8E-01 |
| cg24786530 | NDUFA9    | chr12 | Body    | 0.98 | (0.71; 1.34) | 8.8E-01 |
| cg18849737 | MTNR1A    | chr4  | Body    | 0.98 | (0.7; 1.35)  | 8.8E-01 |
| cg24809525 | POU2F1    | chr1  | TSS200  | 1.03 | (0.72; 1.46) | 8.8E-01 |
| cg05020273 | TNRC18    | chr7  | Body    | 1.03 | (0.73; 1.44) | 8.8E-01 |
| cg21449640 | PTPRN2    | chr7  | Body    | 1.03 | (0.71; 1.5)  | 8.8E-01 |
| cg25689129 | PTPRS     | chr19 | Body    | 1.02 | (0.75; 1.41) | 8.8E-01 |
| cg04339553 | MEIS2     | chr15 | Body    | 1.03 | (0.71; 1.49) | 8.8E-01 |
| cg24567591 | CREBBP    | chr16 | TSS1500 | 0.97 | (0.61; 1.54) | 8.8E-01 |
| cg26490671 | PTPRN2    | chr7  | Body    | 0.98 | (0.75; 1.29) | 8.8E-01 |
| cg21709263 | FBXO34    | chr14 | 5'UTR   | 0.97 | (0.68; 1.39) | 8.8E-01 |
| cg09274237 | CCDC80    | chr3  | 5'UTR   | 0.95 | (0.48; 1.86) | 8.8E-01 |
| cg09274237 | CCDC80    | chr3  | 1stExon | 0.95 | (0.48; 1.86) | 8.8E-01 |
| cg12444411 | GNA12     | chr7  | Body    | 1.02 | (0.75; 1.41) | 8.8E-01 |
| cg01000576 | TNR       | chr1  | 5'UTR   | 0.97 | (0.64; 1.47) | 8.8E-01 |
| cg00926053 | PTPRN2    | chr7  | Body    | 0.97 | (0.69; 1.37) | 8.8E-01 |
| cg25232967 | AKAP13    | chr15 | Body    | 1.02 | (0.75; 1.4)  | 8.8E-01 |
| cg20809036 | PTPRN2    | chr7  | Body    | 1.02 | (0.77; 1.35) | 8.8E-01 |
| cg08730885 | CNTNAP2   | chr7  | Body    | 1.04 | (0.64; 1.69) | 8.8E-01 |
| cg26158710 | PTPRN2    | chr7  | Body    | 1.03 | (0.72; 1.47) | 8.8E-01 |
| cg01383349 | CREBBP    | chr16 | Body    | 1.03 | (0.69; 1.53) | 8.8E-01 |
| cg10632094 | UBE2E2    | chr3  | TSS1500 | 0.96 | (0.6; 1.56)  | 8.8E-01 |
| cg09974253 | MTCL1     | chr18 | Body    | 0.98 | (0.7; 1.35)  | 8.8E-01 |
| cg12977317 | SCAF8     | chr6  | Body    | 1.03 | (0.7; 1.52)  | 8.8E-01 |
| cg13071778 | PTPRN2    | chr7  | Body    | 0.97 | (0.69; 1.38) | 8.8E-01 |
| cg18384063 | RECQL5    | chr17 | Body    | 0.98 | (0.73; 1.32) | 8.8E-01 |
| cg19665365 | RTN4R     | chr22 | TSS1500 | 1.03 | (0.73; 1.45) | 8.8E-01 |
| cg04177479 | ATF7      | chr12 | 5'UTR   | 0.98 | (0.72; 1.32) | 8.8E-01 |



|            |                  |       |         |      |              |         |
|------------|------------------|-------|---------|------|--------------|---------|
| cg04177479 | <i>ATF7</i>      | chr12 | TSS200  | 0.98 | (0.72; 1.32) | 8.8E-01 |
| cg04177479 | <i>ATF7</i>      | chr12 | Body    | 0.98 | (0.72; 1.32) | 8.8E-01 |
| cg13896105 | <i>CACNA1C</i>   | chr12 | Body    | 0.98 | (0.72; 1.33) | 8.8E-01 |
| cg19824059 | <i>NRXN1</i>     | chr2  | Body    | 0.98 | (0.73; 1.31) | 8.8E-01 |
| cg17236519 | <i>PTPRU</i>     | chr1  | Body    | 1.03 | (0.7; 1.52)  | 8.8E-01 |
| cg01880908 | <i>TNRC6C</i>    | chr17 | 3'UTR   | 0.98 | (0.72; 1.33) | 8.8E-01 |
| cg14981546 | <i>TNRC18</i>    | chr7  | 5'UTR   | 1.02 | (0.76; 1.37) | 8.9E-01 |
| cg14981546 | <i>TNRC18</i>    | chr7  | 1stExon | 1.02 | (0.76; 1.37) | 8.9E-01 |
| cg07251477 | <i>TNR</i>       | chr1  | Body    | 0.97 | (0.69; 1.38) | 8.9E-01 |
| cg10249243 | <i>CDH13</i>     | chr16 | 5'UTR   | 1.03 | (0.69; 1.54) | 8.9E-01 |
| cg10249243 | <i>CDH13</i>     | chr16 | Body    | 1.03 | (0.69; 1.54) | 8.9E-01 |
| cg06751583 | <i>TNRC6B</i>    | chr22 | TSS200  | 0.98 | (0.71; 1.34) | 8.9E-01 |
| cg24603972 | <i>SLC16A9</i>   | chr10 | Body    | 1.03 | (0.73; 1.45) | 8.9E-01 |
| cg13661172 | <i>PTPRN2</i>    | chr7  | Body    | 0.98 | (0.74; 1.3)  | 8.9E-01 |
| cg24217917 | <i>RNU5E-1</i>   | chr5  | Body    | 0.97 | (0.65; 1.46) | 8.9E-01 |
| cg13422701 | <i>CACNA1C</i>   | chr12 | Body    | 1.03 | (0.72; 1.47) | 8.9E-01 |
| cg05241143 | <i>PTPRN2</i>    | chr7  | Body    | 1.02 | (0.76; 1.38) | 8.9E-01 |
| cg06791321 | <i>RTN4RL1</i>   | chr17 | Body    | 1.03 | (0.66; 1.61) | 8.9E-01 |
| cg19620294 | <i>TNFRSF11B</i> | chr8  | TSS1500 | 0.98 | (0.72; 1.33) | 8.9E-01 |
| cg25459931 | <i>UBE2E2</i>    | chr3  | Body    | 1.02 | (0.74; 1.43) | 8.9E-01 |
| cg09642825 | <i>FBXO31</i>    | chr16 | Body    | 1.03 | (0.68; 1.58) | 8.9E-01 |
| cg27002639 | <i>WWOX</i>      | chr16 | Body    | 1.02 | (0.75; 1.4)  | 8.9E-01 |
| cg22151985 | <i>PTPRS</i>     | chr19 | Body    | 0.97 | (0.67; 1.42) | 8.9E-01 |
| cg00005390 | <i>ATP6V0C</i>   | chr16 | Body    | 1.03 | (0.64; 1.66) | 8.9E-01 |
| cg00717995 | <i>ERI3</i>      | chr1  | Body    | 0.98 | (0.71; 1.35) | 8.9E-01 |
| cg05707690 | <i>PTPRN2</i>    | chr7  | Body    | 0.98 | (0.7; 1.37)  | 8.9E-01 |
| cg21712732 | <i>PTPRN2</i>    | chr7  | Body    | 0.97 | (0.68; 1.39) | 8.9E-01 |
| cg11340881 | <i>PTPRN2</i>    | chr7  | Body    | 1.02 | (0.74; 1.41) | 8.9E-01 |
| cg17843256 | <i>CDH13</i>     | chr16 | Body    | 0.98 | (0.7; 1.36)  | 8.9E-01 |
| cg10860771 | <i>EIF2S1</i>    | chr14 | 5'UTR   | 1.02 | (0.75; 1.4)  | 8.9E-01 |
| cg10860771 | <i>EIF2S1</i>    | chr14 | 1stExon | 1.02 | (0.75; 1.4)  | 8.9E-01 |
| cg04927789 | <i>TENM2</i>     | chr5  | Body    | 0.98 | (0.69; 1.39) | 8.9E-01 |
| cg03904534 | <i>WWOX</i>      | chr16 | Body    | 1.02 | (0.75; 1.4)  | 8.9E-01 |
| cg26969937 | <i>PTPRN2</i>    | chr7  | Body    | 0.98 | (0.73; 1.31) | 8.9E-01 |
| cg14368117 | <i>MEIS2</i>     | chr15 | Body    | 0.97 | (0.63; 1.49) | 8.9E-01 |
| cg11053171 | <i>PTPRN2</i>    | chr7  | Body    | 1.02 | (0.75; 1.39) | 8.9E-01 |
| cg00524377 | <i>FSTL1</i>     | chr3  | Body    | 0.96 | (0.53; 1.73) | 8.9E-01 |
| cg13444005 | <i>TNR</i>       | chr1  | Body    | 1.02 | (0.76; 1.38) | 8.9E-01 |
| cg08211120 | <i>CREBBP</i>    | chr16 | Body    | 0.98 | (0.69; 1.38) | 8.9E-01 |
| cg15868652 | <i>PTPRU</i>     | chr1  | Body    | 1.02 | (0.75; 1.39) | 8.9E-01 |
| cg03284095 | <i>PTPRS</i>     | chr19 | 5'UTR   | 1.03 | (0.71; 1.47) | 8.9E-01 |
| cg27241907 | <i>UBE2E2</i>    | chr3  | TSS200  | 0.98 | (0.73; 1.31) | 8.9E-01 |
| cg27406925 | <i>PTPRN2</i>    | chr7  | Body    | 0.98 | (0.73; 1.31) | 8.9E-01 |
| cg08672720 | <i>PTPRN2</i>    | chr7  | Body    | 0.97 | (0.67; 1.41) | 8.9E-01 |
| cg27476248 | <i>CUX2</i>      | chr12 | Body    | 0.97 | (0.67; 1.41) | 8.9E-01 |
| cg07605799 | <i>ATF7IP2</i>   | chr16 | TSS1500 | 0.98 | (0.69; 1.38) | 8.9E-01 |
| cg07663492 | <i>WWOX</i>      | chr16 | Body    | 0.98 | (0.7; 1.37)  | 8.9E-01 |
| cg11509269 | <i>TNRC6B</i>    | chr22 | TSS1500 | 0.98 | (0.68; 1.4)  | 8.9E-01 |
| cg19943799 | <i>CHD6</i>      | chr20 | 5'UTR   | 0.98 | (0.7; 1.36)  | 8.9E-01 |
| cg02748089 | <i>WWOX</i>      | chr16 | Body    | 1.02 | (0.73; 1.44) | 8.9E-01 |
| cg10967789 | <i>FBXO31</i>    | chr16 | Body    | 1.02 | (0.73; 1.44) | 8.9E-01 |
| cg10967789 | <i>FBXO31</i>    | chr16 | 5'UTR   | 1.02 | (0.73; 1.44) | 8.9E-01 |
| cg21160944 | <i>PTPRN2</i>    | chr7  | Body    | 0.98 | (0.72; 1.32) | 8.9E-01 |
| cg00115741 | <i>PTPRU</i>     | chr1  | Body    | 1.02 | (0.73; 1.44) | 8.9E-01 |
| cg16708264 | <i>PTPRN2</i>    | chr7  | Body    | 1.02 | (0.76; 1.36) | 8.9E-01 |
| cg01160733 | <i>DDHD2</i>     | chr8  | Body    | 0.98 | (0.67; 1.41) | 8.9E-01 |
| cg11987816 | <i>GNA12</i>     | chr7  | Body    | 0.98 | (0.72; 1.33) | 8.9E-01 |
| cg11987816 | <i>GNA12</i>     | chr7  | TSS1500 | 0.98 | (0.72; 1.33) | 8.9E-01 |
| cg12946210 | <i>CTDSP2</i>    | chr12 | Body    | 0.97 | (0.66; 1.44) | 8.9E-01 |
| cg23995931 | <i>ATF7</i>      | chr12 | Body    | 0.97 | (0.58; 1.6)  | 8.9E-01 |
| cg22216157 | <i>PTPRN2</i>    | chr7  | Body    | 1.02 | (0.77; 1.35) | 8.9E-01 |



|            |                 |       |         |      |              |         |
|------------|-----------------|-------|---------|------|--------------|---------|
| cg17619804 | <i>PHACTR1</i>  | chr6  | TSS1500 | 1.02 | (0.75; 1.4)  | 8.9E-01 |
| cg15693729 | <i>CHD6</i>     | chr20 | 5'UTR   | 1.02 | (0.73; 1.42) | 8.9E-01 |
| cg14338779 | <i>PTPRN2</i>   | chr7  | Body    | 1.02 | (0.73; 1.44) | 8.9E-01 |
| cg15302705 | <i>GNA12</i>    | chr7  | TSS1500 | 0.97 | (0.65; 1.46) | 8.9E-01 |
| cg02933742 | <i>ATF7</i>     | chr12 | 3'UTR   | 1.02 | (0.75; 1.4)  | 8.9E-01 |
| cg02933742 | <i>ATF7</i>     | chr12 | Body    | 1.02 | (0.75; 1.4)  | 8.9E-01 |
| cg02717454 | <i>CREBBP</i>   | chr16 | Body    | 0.96 | (0.53; 1.75) | 8.9E-01 |
| cg10078132 | <i>PTPRN2</i>   | chr7  | Body    | 1.02 | (0.78; 1.34) | 8.9E-01 |
| cg13327129 | <i>PTPRN2</i>   | chr7  | Body    | 0.97 | (0.66; 1.44) | 8.9E-01 |
| cg21341435 | <i>PTPRN2</i>   | chr7  | Body    | 0.98 | (0.68; 1.39) | 8.9E-01 |
| cg02831727 | <i>WWOX</i>     | chr16 | Body    | 1.02 | (0.75; 1.38) | 8.9E-01 |
| cg04764187 | <i>ORC4</i>     | chr2  | Body    | 0.98 | (0.69; 1.38) | 8.9E-01 |
| cg18570383 | <i>NRXN1</i>    | chr2  | Body    | 0.97 | (0.63; 1.49) | 9.0E-01 |
| cg16995768 | <i>PTPRN2</i>   | chr7  | Body    | 1.02 | (0.74; 1.4)  | 9.0E-01 |
| cg02356647 | <i>PTPRN2</i>   | chr7  | Body    | 1.02 | (0.73; 1.43) | 9.0E-01 |
| cg19210352 | <i>CREBBP</i>   | chr16 | Body    | 1.03 | (0.66; 1.6)  | 9.0E-01 |
| cg01182742 | <i>RNU5E-1</i>  | chr5  | Body    | 0.98 | (0.74; 1.31) | 9.0E-01 |
| cg24623046 | <i>PTPRN2</i>   | chr7  | Body    | 1.02 | (0.74; 1.42) | 9.0E-01 |
| cg13961990 | <i>CDH13</i>    | chr16 | 5'UTR   | 1.02 | (0.72; 1.46) | 9.0E-01 |
| cg13961990 | <i>CDH13</i>    | chr16 | Body    | 1.02 | (0.72; 1.46) | 9.0E-01 |
| cg17552686 | <i>ZBTB20</i>   | chr3  | 5'UTR   | 1.04 | (0.54; 2.01) | 9.0E-01 |
| cg13445575 | <i>NOL4L</i>    | chr20 | Body    | 0.98 | (0.71; 1.36) | 9.0E-01 |
| cg19131049 | <i>TNRC6B</i>   | chr22 | TSS200  | 0.98 | (0.72; 1.33) | 9.0E-01 |
| cg24963653 | <i>PTPRN2</i>   | chr7  | Body    | 0.97 | (0.66; 1.45) | 9.0E-01 |
| cg20748143 | <i>CACNA1C</i>  | chr12 | 5'UTR   | 0.98 | (0.72; 1.33) | 9.0E-01 |
| cg20748143 | <i>CACNA1C</i>  | chr12 | 1stExon | 0.98 | (0.72; 1.33) | 9.0E-01 |
| cg24072927 | <i>PTPRN2</i>   | chr7  | Body    | 1.02 | (0.75; 1.4)  | 9.0E-01 |
| cg00100375 | <i>TENM2</i>    | chr5  | Body    | 0.98 | (0.73; 1.32) | 9.0E-01 |
| cg05264279 | <i>PTPRN2</i>   | chr7  | Body    | 0.98 | (0.71; 1.36) | 9.0E-01 |
| cg05577736 | <i>MTCL1</i>    | chr18 | Body    | 1.02 | (0.74; 1.41) | 9.0E-01 |
| cg09017928 | <i>PTPRN2</i>   | chr7  | Body    | 1.02 | (0.73; 1.43) | 9.0E-01 |
| cg24359717 | <i>FBXO32</i>   | chr8  | Body    | 0.96 | (0.52; 1.77) | 9.0E-01 |
| cg10455486 | <i>CDH11</i>    | chr16 | ExonBnd | 0.98 | (0.7; 1.37)  | 9.0E-01 |
| cg10455486 | <i>CDH11</i>    | chr16 | Body    | 0.98 | (0.7; 1.37)  | 9.0E-01 |
| cg17525025 | <i>TNRC6A</i>   | chr16 | TSS1500 | 1.02 | (0.75; 1.4)  | 9.0E-01 |
| cg25069772 | <i>PHACTR1</i>  | chr6  | Body    | 1.02 | (0.76; 1.38) | 9.0E-01 |
| cg16852792 | <i>NRXN1</i>    | chr2  | Body    | 1.02 | (0.72; 1.44) | 9.0E-01 |
| cg02352722 | <i>CDH11</i>    | chr16 | 5'UTR   | 1.03 | (0.64; 1.65) | 9.0E-01 |
| cg12302983 | <i>UBE2E2</i>   | chr3  | 5'UTR   | 0.97 | (0.63; 1.49) | 9.0E-01 |
| cg10656742 | <i>TNFRSF19</i> | chr13 | 5'UTR   | 0.97 | (0.64; 1.48) | 9.0E-01 |
| cg10656742 | <i>TNFRSF19</i> | chr13 | TSS1500 | 0.97 | (0.64; 1.48) | 9.0E-01 |
| cg10555307 | <i>CTNND2</i>   | chr5  | Body    | 0.98 | (0.69; 1.39) | 9.0E-01 |
| cg02485588 | <i>TNRC18</i>   | chr7  | Body    | 1.03 | (0.69; 1.53) | 9.0E-01 |
| cg15018217 | <i>WWOX</i>     | chr16 | Body    | 0.98 | (0.71; 1.35) | 9.0E-01 |
| cg01791684 | <i>RECQL5</i>   | chr17 | TSS1500 | 0.98 | (0.7; 1.36)  | 9.0E-01 |
| cg25276892 | <i>TNRC6B</i>   | chr22 | Body    | 0.97 | (0.56; 1.65) | 9.0E-01 |
| cg25276892 | <i>TNRC6B</i>   | chr22 | TSS1500 | 0.97 | (0.56; 1.65) | 9.0E-01 |
| cg11251135 | <i>RTN4RL1</i>  | chr17 | Body    | 1.02 | (0.73; 1.43) | 9.0E-01 |
| cg00661512 | <i>ATP8A1</i>   | chr4  | Body    | 0.98 | (0.7; 1.36)  | 9.0E-01 |
| cg08987482 | <i>PEX14</i>    | chr1  | Body    | 1.03 | (0.63; 1.7)  | 9.0E-01 |
| cg23544566 | <i>PTPRN2</i>   | chr7  | Body    | 0.98 | (0.69; 1.39) | 9.0E-01 |
| cg06659019 | <i>TENM2</i>    | chr5  | Body    | 1.02 | (0.73; 1.42) | 9.0E-01 |
| cg15097617 | <i>CNTNAP2</i>  | chr7  | Body    | 0.98 | (0.69; 1.39) | 9.0E-01 |
| cg09159856 | <i>SRSF10</i>   | chr1  | Body    | 1.03 | (0.65; 1.63) | 9.0E-01 |
| cg09159856 | <i>SRSF10</i>   | chr1  | 3'UTR   | 1.03 | (0.65; 1.63) | 9.0E-01 |
| cg00930755 | <i>TENM2</i>    | chr5  | Body    | 0.95 | (0.45; 2.01) | 9.0E-01 |
| cg20943251 | <i>COL1A2</i>   | chr7  | 3'UTR   | 0.98 | (0.72; 1.33) | 9.0E-01 |
| cg24204878 | <i>PTPRN2</i>   | chr7  | Body    | 0.98 | (0.67; 1.43) | 9.0E-01 |
| cg09728869 | <i>AKAP13</i>   | chr15 | 5'UTR   | 0.97 | (0.57; 1.63) | 9.0E-01 |
| cg03258760 | <i>TNFRSF19</i> | chr13 | 5'UTR   | 1.02 | (0.75; 1.39) | 9.0E-01 |
| cg03258760 | <i>TNFRSF19</i> | chr13 | TSS1500 | 1.02 | (0.75; 1.39) | 9.0E-01 |



|            |           |       |         |      |              |         |
|------------|-----------|-------|---------|------|--------------|---------|
| cg02927136 | ACVR2A    | chr2  | Body    | 0.98 | (0.72; 1.34) | 9.0E-01 |
| cg16678412 | ATF7IP2   | chr16 | Body    | 0.98 | (0.67; 1.42) | 9.0E-01 |
| cg25102472 | CACNA1C   | chr12 | Body    | 0.98 | (0.69; 1.38) | 9.0E-01 |
| cg18928956 | NDUFA9    | chr12 | Body    | 0.98 | (0.7; 1.38)  | 9.0E-01 |
| cg18928956 | AKAP3     | chr12 | TSS1500 | 0.98 | (0.7; 1.38)  | 9.0E-01 |
| cg00095626 | GNA12     | chr7  | Body    | 1.02 | (0.73; 1.43) | 9.0E-01 |
| cg02994349 | SGIP1     | chr1  | TSS200  | 1.03 | (0.67; 1.58) | 9.0E-01 |
| cg03424860 | PTPRN2    | chr7  | Body    | 0.98 | (0.72; 1.33) | 9.0E-01 |
| cg27466709 | RTN4RL1   | chr17 | Body    | 0.97 | (0.61; 1.55) | 9.0E-01 |
| cg26054057 | CTDSPL    | chr3  | Body    | 0.98 | (0.67; 1.42) | 9.0E-01 |
| cg23862140 | PHACTR1   | chr6  | Body    | 0.98 | (0.66; 1.44) | 9.0E-01 |
| cg03436967 | CNTNAP2   | chr7  | Body    | 0.98 | (0.71; 1.35) | 9.0E-01 |
| cg26001056 | AKAP13    | chr15 | 5'UTR   | 1.05 | (0.49; 2.22) | 9.0E-01 |
| cg14895029 | GNA12     | chr7  | Body    | 0.98 | (0.71; 1.36) | 9.0E-01 |
| cg13266188 | UBE2E2    | chr3  | Body    | 0.98 | (0.7; 1.38)  | 9.0E-01 |
| cg07298917 | DMXL2     | chr15 | Body    | 0.98 | (0.68; 1.4)  | 9.0E-01 |
| cg14973055 | DNAI2     | chr17 | Body    | 1.03 | (0.63; 1.68) | 9.0E-01 |
| cg21364020 | TNRC18    | chr7  | Body    | 0.98 | (0.74; 1.3)  | 9.0E-01 |
| cg14355023 | CNTNAP2   | chr7  | Body    | 0.98 | (0.72; 1.34) | 9.0E-01 |
| cg26281728 | AKAP13    | chr15 | 5'UTR   | 1.02 | (0.75; 1.39) | 9.0E-01 |
| cg26281728 | AKAP13    | chr15 | 1stExon | 1.02 | (0.75; 1.39) | 9.0E-01 |
| cg24635257 | TNFRSF1B  | chr1  | TSS200  | 1.02 | (0.72; 1.44) | 9.0E-01 |
| cg24077076 | PTPRN2    | chr7  | Body    | 1.02 | (0.76; 1.35) | 9.0E-01 |
| cg01434465 | TENM2     | chr5  | Body    | 1.02 | (0.69; 1.51) | 9.0E-01 |
| cg09388810 | TNRC18    | chr7  | Body    | 0.98 | (0.7; 1.37)  | 9.0E-01 |
| cg15704521 | GNA12     | chr7  | Body    | 1.05 | (0.47; 2.34) | 9.0E-01 |
| cg27616595 | CNTNAP2   | chr7  | Body    | 0.97 | (0.64; 1.49) | 9.0E-01 |
| cg12232006 | WWOX      | chr16 | Body    | 0.98 | (0.71; 1.36) | 9.0E-01 |
| cg13974683 | DMXL2     | chr15 | Body    | 0.97 | (0.56; 1.68) | 9.0E-01 |
| cg17737875 | PTPRN2    | chr7  | Body    | 1.02 | (0.76; 1.37) | 9.0E-01 |
| cg02620569 | CTNND2    | chr5  | Body    | 1.02 | (0.75; 1.38) | 9.0E-01 |
| cg18882910 | CACNA1C   | chr12 | Body    | 0.98 | (0.68; 1.42) | 9.1E-01 |
| cg18639374 | PTPRN2    | chr7  | Body    | 0.98 | (0.72; 1.33) | 9.1E-01 |
| cg26786017 | WWOX      | chr16 | Body    | 1.02 | (0.74; 1.41) | 9.1E-01 |
| cg00501111 | ZFP91     | chr11 | TSS1500 | 1.02 | (0.72; 1.44) | 9.1E-01 |
| cg15199594 | TENM2     | chr5  | TSS1500 | 1.02 | (0.68; 1.54) | 9.1E-01 |
| cg10934821 | TAOK3     | chr12 | 5'UTR   | 1.02 | (0.75; 1.39) | 9.1E-01 |
| cg16510127 | MEX3A     | chr1  | Body    | 0.98 | (0.7; 1.38)  | 9.1E-01 |
| cg16066771 | CACNA1C   | chr12 | Body    | 1.02 | (0.72; 1.45) | 9.1E-01 |
| cg04481045 | TNRC18    | chr7  | Body    | 0.98 | (0.71; 1.36) | 9.1E-01 |
| cg27196442 | WWOX      | chr16 | Body    | 1.02 | (0.75; 1.38) | 9.1E-01 |
| cg13836770 | TNFRSF1B  | chr1  | TSS200  | 1.02 | (0.75; 1.39) | 9.1E-01 |
| cg05231753 | TNFRSF10B | chr8  | Body    | 0.98 | (0.71; 1.35) | 9.1E-01 |
| cg26942930 | CNTNAP2   | chr7  | Body    | 0.98 | (0.7; 1.37)  | 9.1E-01 |
| cg10754395 | PTPRN2    | chr7  | Body    | 1.02 | (0.7; 1.49)  | 9.1E-01 |
| cg26926387 | CUX2      | chr12 | Body    | 1.02 | (0.74; 1.4)  | 9.1E-01 |
| cg11889808 | PTPRN2    | chr7  | Body    | 1.02 | (0.72; 1.45) | 9.1E-01 |
| cg03879673 | SGIP1     | chr1  | 5'UTR   | 0.97 | (0.61; 1.54) | 9.1E-01 |
| cg03879673 | SGIP1     | chr1  | 1stExon | 0.97 | (0.61; 1.54) | 9.1E-01 |
| cg05841636 | MBD5      | chr2  | 5'UTR   | 1.02 | (0.7; 1.49)  | 9.1E-01 |
| cg13060572 | TNRC6B    | chr22 | Body    | 1.03 | (0.66; 1.59) | 9.1E-01 |
| cg20978220 | AKAP13    | chr15 | Body    | 1.03 | (0.67; 1.56) | 9.1E-01 |
| cg10518481 | PTPRS     | chr19 | TSS1500 | 0.98 | (0.72; 1.33) | 9.1E-01 |
| cg13857601 | WWOX      | chr16 | TSS1500 | 1.02 | (0.72; 1.46) | 9.1E-01 |
| cg12879569 | CACNA1C   | chr12 | Body    | 1.02 | (0.76; 1.37) | 9.1E-01 |
| cg16821426 | CHCHD6    | chr3  | Body    | 0.98 | (0.67; 1.42) | 9.1E-01 |
| cg02920900 | PTPRN2    | chr7  | Body    | 1.02 | (0.75; 1.39) | 9.1E-01 |
| cg27099497 | PTPRN2    | chr7  | Body    | 1.02 | (0.76; 1.36) | 9.1E-01 |
| cg04693494 | NOL4L     | chr20 | Body    | 1.02 | (0.72; 1.46) | 9.1E-01 |
| cg11813009 | CTDSPL2   | chr15 | 5'UTR   | 1.02 | (0.75; 1.38) | 9.1E-01 |
| cg08424893 | TNRC6B    | chr22 | Body    | 0.96 | (0.51; 1.82) | 9.1E-01 |



|            |              |       |         |      |              |         |
|------------|--------------|-------|---------|------|--------------|---------|
| cg04244873 | ORC4         | chr2  | 5'UTR   | 0.98 | (0.71; 1.36) | 9.1E-01 |
| cg24671229 | CSMD2        | chr1  | Body    | 1.02 | (0.76; 1.37) | 9.1E-01 |
| cg22719146 | CTNND2       | chr5  | Body    | 1.02 | (0.75; 1.38) | 9.1E-01 |
| cg12692286 | SUGCT        | chr7  | Body    | 0.98 | (0.73; 1.32) | 9.1E-01 |
| cg19349713 | CPEB1        | chr15 | Body    | 0.97 | (0.53; 1.77) | 9.1E-01 |
| cg15243702 | CTDSPL2      | chr15 | 5'UTR   | 0.98 | (0.68; 1.4)  | 9.1E-01 |
| cg10535597 | CUX2         | chr12 | Body    | 1.02 | (0.72; 1.44) | 9.1E-01 |
| cg27195778 | ZBTB20       | chr3  | 5'UTR   | 1.02 | (0.69; 1.51) | 9.1E-01 |
| cg27195778 | ZBTB20       | chr3  | Body    | 1.02 | (0.69; 1.51) | 9.1E-01 |
| cg17385674 | ARID1A       | chr1  | TSS1500 | 0.98 | (0.72; 1.34) | 9.1E-01 |
| cg26641455 | PTPRN2       | chr7  | Body    | 1.02 | (0.74; 1.41) | 9.1E-01 |
| cg00418027 | BARX1        | chr9  | Body    | 0.97 | (0.59; 1.6)  | 9.1E-01 |
| cg12770149 | SUSD4        | chr1  | 5'UTR   | 0.98 | (0.68; 1.42) | 9.1E-01 |
| cg21733150 | SGIP1        | chr1  | Body    | 1.02 | (0.71; 1.46) | 9.1E-01 |
| cg22498223 | PTPRN2       | chr7  | Body    | 0.98 | (0.67; 1.43) | 9.1E-01 |
| cg14289852 | PTPRN2       | chr7  | Body    | 0.98 | (0.73; 1.32) | 9.1E-01 |
| cg06251773 | CSMD2        | chr1  | Body    | 0.97 | (0.59; 1.6)  | 9.1E-01 |
| cg14422759 | RTN4R        | chr22 | Body    | 1.02 | (0.71; 1.46) | 9.1E-01 |
| cg12820461 | PTPRN2       | chr7  | Body    | 0.98 | (0.69; 1.39) | 9.1E-01 |
| cg08549497 | WWOX         | chr16 | Body    | 1.02 | (0.74; 1.4)  | 9.1E-01 |
| cg00765111 | TENM2        | chr5  | Body    | 0.98 | (0.71; 1.35) | 9.1E-01 |
| cg00765111 | CTB-178M22.2 | chr5  | TSS1500 | 0.98 | (0.71; 1.35) | 9.1E-01 |
| cg13987304 | TENM2        | chr5  | Body    | 1.02 | (0.74; 1.4)  | 9.1E-01 |
| cg13987304 | CTB-178M22.2 | chr5  | Body    | 1.02 | (0.74; 1.4)  | 9.1E-01 |
| cg09784523 | ELAVL4       | chr1  | TSS1500 | 1.02 | (0.69; 1.51) | 9.1E-01 |
| cg09784523 | ELAVL4       | chr1  | TSS200  | 1.02 | (0.69; 1.51) | 9.1E-01 |
| cg09784523 | ELAVL4       | chr1  | Body    | 1.02 | (0.69; 1.51) | 9.1E-01 |
| cg12108849 | TNR          | chr1  | Body    | 0.98 | (0.64; 1.49) | 9.1E-01 |
| cg18241780 | TAOK3        | chr12 | Body    | 0.98 | (0.71; 1.35) | 9.1E-01 |
| cg23263176 | TENM2        | chr5  | Body    | 1.02 | (0.74; 1.39) | 9.1E-01 |
| cg11028496 | PTPRN2       | chr7  | Body    | 1.02 | (0.75; 1.39) | 9.1E-01 |
| cg10253902 | DACH1        | chr13 | Body    | 1.02 | (0.69; 1.52) | 9.1E-01 |
| cg19524238 | GNA12        | chr7  | Body    | 1.02 | (0.76; 1.37) | 9.1E-01 |
| cg14211350 | PTPRN2       | chr7  | Body    | 1.02 | (0.72; 1.45) | 9.1E-01 |
| cg25037841 | RTN4R        | chr22 | Body    | 0.98 | (0.7; 1.38)  | 9.1E-01 |
| cg14430141 | TNR          | chr1  | 5'UTR   | 0.98 | (0.63; 1.52) | 9.1E-01 |
| cg25387685 | PTPRN2       | chr7  | Body    | 0.98 | (0.69; 1.39) | 9.1E-01 |
| cg03161673 | PTPRN2       | chr7  | Body    | 0.98 | (0.68; 1.41) | 9.1E-01 |
| cg12015310 | MEIS2        | chr15 | 5'UTR   | 1.02 | (0.71; 1.46) | 9.1E-01 |
| cg12015310 | MEIS2        | chr15 | 1stExon | 1.02 | (0.71; 1.46) | 9.1E-01 |
| cg12015310 | MEIS2        | chr15 | TSS1500 | 1.02 | (0.71; 1.46) | 9.1E-01 |
| cg27190366 | RTN4         | chr2  | TSS200  | 0.98 | (0.72; 1.34) | 9.1E-01 |
| cg09709951 | ATF7         | chr12 | 5'UTR   | 1.02 | (0.77; 1.35) | 9.1E-01 |
| cg14002960 | NOL4         | chr18 | Body    | 0.98 | (0.63; 1.5)  | 9.1E-01 |
| cg01961965 | PTPRN2       | chr7  | Body    | 1.02 | (0.74; 1.39) | 9.1E-01 |
| cg03987919 | CTNND2       | chr5  | Body    | 0.98 | (0.64; 1.5)  | 9.1E-01 |
| cg03987919 | CTNND2       | chr5  | 5'UTR   | 0.98 | (0.64; 1.5)  | 9.1E-01 |
| cg23168264 | MEIS2        | chr15 | 5'UTR   | 0.98 | (0.72; 1.35) | 9.1E-01 |
| cg23168264 | MEIS2        | chr15 | 1stExon | 0.98 | (0.72; 1.35) | 9.1E-01 |
| cg23168264 | MEIS2        | chr15 | TSS1500 | 0.98 | (0.72; 1.35) | 9.1E-01 |
| cg27254040 | NRXN1        | chr2  | Body    | 1.02 | (0.7; 1.49)  | 9.2E-01 |
| cg22400059 | PEX14        | chr1  | Body    | 0.98 | (0.7; 1.37)  | 9.2E-01 |
| cg26995924 | RTN4         | chr2  | TSS1500 | 0.98 | (0.68; 1.41) | 9.2E-01 |
| cg26995924 | RTN4         | chr2  | Body    | 0.98 | (0.68; 1.41) | 9.2E-01 |
| cg13632655 | PTPRN2       | chr7  | Body    | 1.02 | (0.72; 1.44) | 9.2E-01 |
| cg04910840 | FBXO36       | chr2  | TSS200  | 0.98 | (0.71; 1.35) | 9.2E-01 |
| cg21832978 | ALCAM        | chr3  | Body    | 0.98 | (0.7; 1.38)  | 9.2E-01 |
| cg07385090 | WWOX         | chr16 | 5'UTR   | 0.98 | (0.71; 1.36) | 9.2E-01 |
| cg07385090 | WWOX         | chr16 | Body    | 0.98 | (0.71; 1.36) | 9.2E-01 |
| cg07385090 | WWOX         | chr16 | 1stExon | 0.98 | (0.71; 1.36) | 9.2E-01 |
| cg27347936 | CTNND2       | chr5  | Body    | 1.02 | (0.68; 1.53) | 9.2E-01 |



|            |                  |       |         |      |              |         |
|------------|------------------|-------|---------|------|--------------|---------|
| cg27347936 | <i>CTNND2</i>    | chr5  | 5'UTR   | 1.02 | (0.68; 1.53) | 9.2E-01 |
| cg25402818 | <i>PTPRN2</i>    | chr7  | Body    | 0.98 | (0.7; 1.38)  | 9.2E-01 |
| cg10434814 | <i>PTPRN2</i>    | chr7  | Body    | 0.98 | (0.74; 1.31) | 9.2E-01 |
| cg00762354 | <i>CEP350</i>    | chr1  | Body    | 1.02 | (0.76; 1.35) | 9.2E-01 |
| cg24728456 | <i>CSMD2</i>     | chr1  | Body    | 1.02 | (0.74; 1.4)  | 9.2E-01 |
| cg26411041 | <i>ATF7</i>      | chr12 | Body    | 0.98 | (0.71; 1.36) | 9.2E-01 |
| cg02019508 | <i>ATF7</i>      | chr12 | TSS1500 | 0.98 | (0.72; 1.35) | 9.2E-01 |
| cg02019508 | <i>ATF7</i>      | chr12 | 5'UTR   | 0.98 | (0.72; 1.35) | 9.2E-01 |
| cg12134752 | <i>PTPRS</i>     | chr19 | Body    | 0.97 | (0.6; 1.59)  | 9.2E-01 |
| cg19593344 | <i>PTPRN2</i>    | chr7  | Body    | 0.98 | (0.72; 1.34) | 9.2E-01 |
| cg01148766 | <i>CTNND2</i>    | chr5  | Body    | 1.02 | (0.76; 1.36) | 9.2E-01 |
| cg21221712 | <i>AKAP13</i>    | chr15 | Body    | 1.02 | (0.71; 1.45) | 9.2E-01 |
| cg09947615 | <i>ATP8A1</i>    | chr4  | TSS1500 | 0.98 | (0.71; 1.36) | 9.2E-01 |
| cg08944961 | <i>CUX2</i>      | chr12 | Body    | 0.98 | (0.66; 1.44) | 9.2E-01 |
| cg00461149 | <i>PTPRN2</i>    | chr7  | Body    | 0.98 | (0.68; 1.41) | 9.2E-01 |
| cg08401143 | <i>PTPRN2</i>    | chr7  | Body    | 0.98 | (0.72; 1.34) | 9.2E-01 |
| cg15460516 | <i>TNFRSF12A</i> | chr16 | TSS200  | 0.98 | (0.73; 1.33) | 9.2E-01 |
| cg05635096 | <i>CCDC80</i>    | chr3  | Body    | 1.02 | (0.73; 1.41) | 9.2E-01 |
| cg19437757 | <i>PTPRN2</i>    | chr7  | Body    | 0.98 | (0.72; 1.34) | 9.2E-01 |
| cg23131026 | <i>FBXO31</i>    | chr16 | TSS1500 | 0.98 | (0.69; 1.39) | 9.2E-01 |
| cg11020333 | <i>GNA12</i>     | chr7  | Body    | 1.03 | (0.63; 1.66) | 9.2E-01 |
| cg17133734 | <i>AKAP13</i>    | chr15 | Body    | 0.98 | (0.7; 1.38)  | 9.2E-01 |
| cg12937684 | <i>PTPRN2</i>    | chr7  | Body    | 1.02 | (0.72; 1.44) | 9.2E-01 |
| cg09130676 | <i>PTPRN2</i>    | chr7  | Body    | 0.98 | (0.69; 1.4)  | 9.2E-01 |
| cg23887878 | <i>NRXN1</i>     | chr2  | Body    | 1.02 | (0.67; 1.57) | 9.2E-01 |
| cg12888632 | <i>PTPRU</i>     | chr1  | Body    | 1.02 | (0.68; 1.53) | 9.2E-01 |
| cg24457614 | <i>NRXN1</i>     | chr2  | Body    | 0.98 | (0.68; 1.41) | 9.2E-01 |
| cg23538400 | <i>RTN4RL1</i>   | chr17 | Body    | 1.02 | (0.7; 1.48)  | 9.2E-01 |
| cg27322071 | <i>FBXO31</i>    | chr16 | Body    | 0.98 | (0.69; 1.4)  | 9.2E-01 |
| cg03859906 | <i>ACVR2A</i>    | chr2  | 5'UTR   | 0.99 | (0.74; 1.32) | 9.2E-01 |
| cg03859906 | <i>ACVR2A</i>    | chr2  | Body    | 0.99 | (0.74; 1.32) | 9.2E-01 |
| cg24591824 | <i>CACNA1C</i>   | chr12 | Body    | 0.98 | (0.71; 1.36) | 9.2E-01 |
| cg22959894 | <i>PTPRN2</i>    | chr7  | Body    | 0.98 | (0.62; 1.55) | 9.2E-01 |
| cg07806164 | <i>UBE2E2</i>    | chr3  | TSS200  | 1.02 | (0.74; 1.4)  | 9.2E-01 |
| cg04234424 | <i>CNTNAP2</i>   | chr7  | Body    | 1.02 | (0.74; 1.4)  | 9.2E-01 |
| cg24436689 | <i>DCUN1D4</i>   | chr4  | TSS1500 | 0.98 | (0.65; 1.47) | 9.2E-01 |
| cg21934675 | <i>SGIP1</i>     | chr1  | Body    | 0.98 | (0.7; 1.39)  | 9.2E-01 |
| cg16665765 | <i>CTDSPL</i>    | chr3  | Body    | 0.97 | (0.55; 1.71) | 9.2E-01 |
| cg21301642 | <i>CTDSPL</i>    | chr3  | Body    | 0.95 | (0.37; 2.43) | 9.2E-01 |
| cg01235172 | <i>PTPRN2</i>    | chr7  | Body    | 0.98 | (0.61; 1.55) | 9.2E-01 |
| cg06073499 | <i>CSMD2</i>     | chr1  | Body    | 1.02 | (0.74; 1.4)  | 9.2E-01 |
| cg14897316 | <i>CUX2</i>      | chr12 | Body    | 0.98 | (0.72; 1.35) | 9.2E-01 |
| cg01916446 | <i>FBXO31</i>    | chr16 | TSS200  | 0.99 | (0.73; 1.32) | 9.2E-01 |
| cg20844469 | <i>CDH13</i>     | chr16 | 5'UTR   | 1.02 | (0.7; 1.47)  | 9.2E-01 |
| cg20844469 | <i>CDH13</i>     | chr16 | Body    | 1.02 | (0.7; 1.47)  | 9.2E-01 |
| cg22729960 | <i>PTPRU</i>     | chr1  | Body    | 0.98 | (0.71; 1.36) | 9.2E-01 |
| cg18327157 | <i>PTPRN2</i>    | chr7  | Body    | 1.02 | (0.74; 1.4)  | 9.2E-01 |
| cg09258788 | <i>PTPRN2</i>    | chr7  | Body    | 0.98 | (0.71; 1.37) | 9.2E-01 |
| cg11889800 | <i>AKAP13</i>    | chr15 | Body    | 0.97 | (0.54; 1.76) | 9.2E-01 |
| cg13104745 | <i>TNRC18</i>    | chr7  | Body    | 1.02 | (0.68; 1.53) | 9.2E-01 |
| cg13144857 | <i>PDE8A</i>     | chr15 | 5'UTR   | 0.98 | (0.65; 1.47) | 9.2E-01 |
| cg13144857 | <i>PDE8A</i>     | chr15 | Body    | 0.98 | (0.65; 1.47) | 9.2E-01 |
| cg05308556 | <i>PTPRN2</i>    | chr7  | Body    | 0.99 | (0.73; 1.33) | 9.2E-01 |
| cg16772598 | <i>COL5A2</i>    | chr2  | TSS1500 | 0.98 | (0.65; 1.47) | 9.2E-01 |
| cg04860285 | <i>CHCHD6</i>    | chr3  | Body    | 0.98 | (0.66; 1.46) | 9.2E-01 |
| cg18459233 | <i>TAOK3</i>     | chr12 | 5'UTR   | 0.98 | (0.72; 1.34) | 9.2E-01 |
| cg06890761 | <i>PTPRN2</i>    | chr7  | Body    | 1.02 | (0.74; 1.4)  | 9.2E-01 |
| cg10358780 | <i>GOLT1B</i>    | chr12 | 5'UTR   | 1.01 | (0.76; 1.35) | 9.2E-01 |
| cg10358780 | <i>GOLT1B</i>    | chr12 | 1stExon | 1.01 | (0.76; 1.35) | 9.2E-01 |
| cg10358780 | <i>RECQL</i>     | chr12 | TSS200  | 1.01 | (0.76; 1.35) | 9.2E-01 |
| cg12169153 | <i>CREBBP</i>    | chr16 | Body    | 1.02 | (0.74; 1.39) | 9.2E-01 |



|            |                  |       |         |      |              |         |
|------------|------------------|-------|---------|------|--------------|---------|
| cg08927975 | <i>FSTL1</i>     | chr3  | Body    | 0.98 | (0.7; 1.39)  | 9.2E-01 |
| cg21658616 | <i>PTPRS</i>     | chr19 | Body    | 0.98 | (0.72; 1.35) | 9.2E-01 |
| cg04134048 | <i>TNFRSF10D</i> | chr8  | TSS200  | 1.02 | (0.73; 1.41) | 9.2E-01 |
| cg08455926 | <i>AKAP13</i>    | chr15 | Body    | 1.02 | (0.73; 1.42) | 9.2E-01 |
| cg08455926 | <i>AKAP13</i>    | chr15 | ExonBnd | 1.02 | (0.73; 1.42) | 9.2E-01 |
| cg15913875 | <i>RTN4</i>      | chr2  | 3'UTR   | 0.99 | (0.72; 1.34) | 9.2E-01 |
| cg00946507 | <i>RECQL5</i>    | chr17 | Body    | 0.98 | (0.69; 1.4)  | 9.2E-01 |
| cg03473270 | <i>TENM2</i>     | chr5  | TSS1500 | 1.02 | (0.68; 1.54) | 9.2E-01 |
| cg15521382 | <i>WVOX</i>      | chr16 | Body    | 1.02 | (0.73; 1.41) | 9.2E-01 |
| cg22148433 | <i>TENM2</i>     | chr5  | Body    | 0.98 | (0.58; 1.65) | 9.2E-01 |
| cg25751788 | <i>RTN4RL2</i>   | chr11 | Body    | 1.02 | (0.69; 1.5)  | 9.2E-01 |
| cg05527604 | <i>PTPRN2</i>    | chr7  | Body    | 0.99 | (0.74; 1.32) | 9.2E-01 |
| cg16006415 | <i>PTPRN2</i>    | chr7  | Body    | 1.02 | (0.68; 1.53) | 9.3E-01 |
| cg16155453 | <i>CACNA1C</i>   | chr12 | Body    | 1.02 | (0.71; 1.46) | 9.3E-01 |
| cg19756611 | <i>DACH1</i>     | chr13 | TSS1500 | 0.98 | (0.68; 1.43) | 9.3E-01 |
| cg09831558 | <i>SCAF8</i>     | chr6  | Body    | 1.02 | (0.71; 1.47) | 9.3E-01 |
| cg03340215 | <i>CPEB1</i>     | chr15 | Body    | 0.99 | (0.73; 1.33) | 9.3E-01 |
| cg11985321 | <i>PTPRN2</i>    | chr7  | Body    | 0.98 | (0.69; 1.4)  | 9.3E-01 |
| cg17020516 | <i>TAOK3</i>     | chr12 | 5'UTR   | 0.98 | (0.68; 1.42) | 9.3E-01 |
| cg23633413 | <i>CHFR</i>      | chr12 | Body    | 1.01 | (0.75; 1.37) | 9.3E-01 |
| cg19374303 | <i>PTPRS</i>     | chr19 | Body    | 0.98 | (0.7; 1.38)  | 9.3E-01 |
| cg23328412 | <i>SGIP1</i>     | chr1  | Body    | 0.98 | (0.64; 1.51) | 9.3E-01 |
| cg23316732 | <i>ZBTB20</i>    | chr3  | 5'UTR   | 1.02 | (0.7; 1.47)  | 9.3E-01 |
| cg12912426 | <i>ATF7IP</i>    | chr12 | 5'UTR   | 1.03 | (0.59; 1.77) | 9.3E-01 |
| cg15672331 | <i>AKAP13</i>    | chr15 | TSS200  | 1.01 | (0.76; 1.36) | 9.3E-01 |
| cg21705926 | <i>PTPRN2</i>    | chr7  | Body    | 0.98 | (0.7; 1.38)  | 9.3E-01 |
| cg10318906 | <i>BARX1</i>     | chr9  | TSS1500 | 0.98 | (0.69; 1.4)  | 9.3E-01 |
| cg23235971 | <i>PTPRN2</i>    | chr7  | Body    | 1.02 | (0.71; 1.46) | 9.3E-01 |
| cg00660163 | <i>MEX3A</i>     | chr1  | TSS1500 | 1.01 | (0.74; 1.39) | 9.3E-01 |
| cg01252513 | <i>CUX2</i>      | chr12 | Body    | 1.01 | (0.76; 1.36) | 9.3E-01 |
| cg13949213 | <i>ERI3</i>      | chr1  | Body    | 0.99 | (0.73; 1.33) | 9.3E-01 |
| cg05316650 | <i>GNA12</i>     | chr7  | Body    | 1.03 | (0.51; 2.09) | 9.3E-01 |
| cg01083894 | <i>ZNF704</i>    | chr8  | 3'UTR   | 0.98 | (0.62; 1.54) | 9.3E-01 |
| cg13763577 | <i>UNC80</i>     | chr2  | Body    | 0.98 | (0.59; 1.61) | 9.3E-01 |
| cg13034073 | <i>GNA12</i>     | chr7  | 3'UTR   | 0.98 | (0.68; 1.43) | 9.3E-01 |
| cg13721576 | <i>TENM2</i>     | chr5  | Body    | 0.98 | (0.71; 1.37) | 9.3E-01 |
| cg20120197 | <i>PTPRN2</i>    | chr7  | Body    | 0.98 | (0.71; 1.37) | 9.3E-01 |
| cg09365942 | <i>SUGCT</i>     | chr7  | Body    | 1.02 | (0.7; 1.47)  | 9.3E-01 |
| cg08792057 | <i>BARX2</i>     | chr11 | Body    | 0.99 | (0.73; 1.34) | 9.3E-01 |
| cg23636833 | <i>PTPRN2</i>    | chr7  | Body    | 0.98 | (0.62; 1.54) | 9.3E-01 |
| cg00097432 | <i>ZBTB20</i>    | chr3  | 5'UTR   | 1.01 | (0.75; 1.38) | 9.3E-01 |
| cg00097432 | <i>ZBTB20</i>    | chr3  | TSS200  | 1.01 | (0.75; 1.38) | 9.3E-01 |
| cg14064193 | <i>PTPRN2</i>    | chr7  | Body    | 1.01 | (0.76; 1.36) | 9.3E-01 |
| cg22626260 | <i>PTPRN2</i>    | chr7  | Body    | 0.98 | (0.68; 1.42) | 9.3E-01 |
| cg13735493 | <i>NOL4L</i>     | chr20 | Body    | 0.96 | (0.37; 2.46) | 9.3E-01 |
| cg11358565 | <i>ELAVL4</i>    | chr1  | Body    | 1.02 | (0.71; 1.46) | 9.3E-01 |
| cg05325288 | <i>ATP6V0C</i>   | chr16 | Body    | 1.01 | (0.75; 1.36) | 9.3E-01 |
| cg22173311 | <i>PTPRS</i>     | chr19 | Body    | 1.01 | (0.73; 1.41) | 9.3E-01 |
| cg26150071 | <i>CSMD2</i>     | chr1  | Body    | 1.01 | (0.73; 1.41) | 9.3E-01 |
| cg05139870 | <i>SMARCD3</i>   | chr7  | TSS200  | 0.98 | (0.57; 1.68) | 9.3E-01 |
| cg05139870 | <i>SMARCD3</i>   | chr7  | Body    | 0.98 | (0.57; 1.68) | 9.3E-01 |
| cg13604276 | <i>PTPRN2</i>    | chr7  | Body    | 0.98 | (0.68; 1.42) | 9.3E-01 |
| cg09604180 | <i>POU2F1</i>    | chr1  | Body    | 0.97 | (0.49; 1.92) | 9.3E-01 |
| cg06094238 | <i>PTPRN2</i>    | chr7  | Body    | 0.99 | (0.72; 1.35) | 9.3E-01 |
| cg06805236 | <i>CUX2</i>      | chr12 | Body    | 1.02 | (0.72; 1.44) | 9.3E-01 |
| cg08330366 | <i>ZFP91</i>     | chr11 | Body    | 0.99 | (0.71; 1.36) | 9.3E-01 |
| cg23243463 | <i>BRUNOL4</i>   | chr18 | TSS1500 | 1.02 | (0.69; 1.51) | 9.3E-01 |
| cg01932827 | <i>RTN4RL2</i>   | chr11 | TSS1500 | 1.02 | (0.72; 1.44) | 9.3E-01 |
| cg01372212 | <i>CTNND2</i>    | chr5  | Body    | 0.98 | (0.69; 1.4)  | 9.3E-01 |
| cg01372212 | <i>CTNND2</i>    | chr5  | 5'UTR   | 0.98 | (0.69; 1.4)  | 9.3E-01 |
| cg07041341 | <i>ATP6V0C</i>   | chr16 | TSS200  | 0.98 | (0.69; 1.41) | 9.3E-01 |



|            |                  |       |         |      |              |         |
|------------|------------------|-------|---------|------|--------------|---------|
| cg07179329 | <i>CDH13</i>     | chr16 | Body    | 1.02 | (0.68; 1.52) | 9.3E-01 |
| cg20993270 | <i>SUGCT</i>     | chr7  | Body    | 1.01 | (0.74; 1.38) | 9.3E-01 |
| cg19013174 | <i>ZBTB20</i>    | chr3  | Body    | 0.98 | (0.69; 1.41) | 9.3E-01 |
| cg19013174 | <i>ZBTB20</i>    | chr3  | 5'UTR   | 0.98 | (0.69; 1.41) | 9.3E-01 |
| cg27040423 | <i>CHFR</i>      | chr12 | TSS1500 | 1.01 | (0.73; 1.4)  | 9.3E-01 |
| cg23987876 | <i>PTPRU</i>     | chr1  | TSS1500 | 1.02 | (0.7; 1.48)  | 9.3E-01 |
| cg02303933 | <i>MTNR1A</i>    | chr4  | Body    | 1.01 | (0.74; 1.38) | 9.3E-01 |
| cg02302183 | <i>CDH13</i>     | chr16 | 5'UTR   | 1.01 | (0.75; 1.36) | 9.3E-01 |
| cg02302183 | <i>CDH13</i>     | chr16 | Body    | 1.01 | (0.75; 1.36) | 9.3E-01 |
| cg06879394 | <i>PHACTR1</i>   | chr6  | Body    | 0.99 | (0.74; 1.32) | 9.3E-01 |
| cg05078438 | <i>CDH13</i>     | chr16 | Body    | 1.01 | (0.72; 1.43) | 9.3E-01 |
| cg18332677 | <i>RTN4R</i>     | chr22 | Body    | 1.03 | (0.52; 2.02) | 9.3E-01 |
| cg11872672 | <i>PTPRN2</i>    | chr7  | Body    | 1.01 | (0.72; 1.43) | 9.3E-01 |
| cg21368462 | <i>ACVR2A</i>    | chr2  | Body    | 1.01 | (0.75; 1.37) | 9.3E-01 |
| cg27109125 | <i>DMXL2</i>     | chr15 | 3'UTR   | 1.02 | (0.69; 1.51) | 9.3E-01 |
| cg04538770 | <i>TENM2</i>     | chr5  | Body    | 1.01 | (0.73; 1.41) | 9.3E-01 |
| cg25675668 | <i>ATP6V0C</i>   | chr16 | TSS1500 | 1.01 | (0.73; 1.41) | 9.3E-01 |
| cg25675668 | <i>ATP6V0C</i>   | chr16 | TSS200  | 1.01 | (0.73; 1.41) | 9.3E-01 |
| cg23752548 | <i>BRUNOL4</i>   | chr18 | Body    | 0.99 | (0.71; 1.37) | 9.3E-01 |
| cg17401720 | <i>PTPRN2</i>    | chr7  | Body    | 1.02 | (0.71; 1.44) | 9.3E-01 |
| cg22824265 | <i>FBXO33</i>    | chr14 | 1stExon | 1.01 | (0.73; 1.41) | 9.3E-01 |
| cg24463469 | <i>FBXO33</i>    | chr14 | Body    | 0.99 | (0.72; 1.35) | 9.3E-01 |
| cg23253053 | <i>CUX2</i>      | chr12 | Body    | 0.98 | (0.65; 1.48) | 9.3E-01 |
| cg23066280 | <i>PTPRN2</i>    | chr7  | Body    | 0.99 | (0.74; 1.32) | 9.3E-01 |
| cg05492172 | <i>SGIP1</i>     | chr1  | Body    | 1.01 | (0.74; 1.39) | 9.3E-01 |
| cg00067702 | <i>TENM2</i>     | chr5  | Body    | 0.98 | (0.64; 1.5)  | 9.3E-01 |
| cg21604450 | <i>SGIP1</i>     | chr1  | TSS1500 | 0.98 | (0.64; 1.5)  | 9.3E-01 |
| cg14260709 | <i>PTPRN2</i>    | chr7  | Body    | 1.01 | (0.74; 1.39) | 9.3E-01 |
| cg08326660 | <i>CNTF</i>      | chr11 | TSS1500 | 1.01 | (0.77; 1.33) | 9.3E-01 |
| cg11620689 | <i>ALCAM</i>     | chr3  | Body    | 1.02 | (0.7; 1.48)  | 9.4E-01 |
| cg05453434 | <i>CDH13</i>     | chr16 | Body    | 0.99 | (0.69; 1.41) | 9.4E-01 |
| cg15657287 | <i>ERI3</i>      | chr1  | Body    | 1.01 | (0.72; 1.44) | 9.4E-01 |
| cg13275908 | <i>COL5A2</i>    | chr2  | Body    | 0.98 | (0.68; 1.43) | 9.4E-01 |
| cg08091526 | <i>WWOX</i>      | chr16 | Body    | 0.99 | (0.72; 1.36) | 9.4E-01 |
| cg05670275 | <i>FBXO36</i>    | chr2  | 1stExon | 1.01 | (0.73; 1.4)  | 9.4E-01 |
| cg08221669 | <i>RTN4R</i>     | chr22 | Body    | 1.01 | (0.74; 1.38) | 9.4E-01 |
| cg21724547 | <i>TNR</i>       | chr1  | 5'UTR   | 0.99 | (0.69; 1.4)  | 9.4E-01 |
| cg27088726 | <i>CDH13</i>     | chr16 | Body    | 1.01 | (0.74; 1.38) | 9.4E-01 |
| cg16423638 | <i>CREBBP</i>    | chr16 | Body    | 0.99 | (0.69; 1.41) | 9.4E-01 |
| cg24114762 | <i>TNFRSF10C</i> | chr8  | TSS1500 | 0.99 | (0.7; 1.4)   | 9.4E-01 |
| cg08685853 | <i>ERI3</i>      | chr1  | Body    | 0.98 | (0.6; 1.6)   | 9.4E-01 |
| cg07771123 | <i>PTPRU</i>     | chr1  | Body    | 1.02 | (0.65; 1.6)  | 9.4E-01 |
| cg26892401 | <i>GNA12</i>     | chr7  | Body    | 0.99 | (0.7; 1.39)  | 9.4E-01 |
| cg06089298 | <i>SCAF8</i>     | chr6  | Body    | 0.99 | (0.74; 1.32) | 9.4E-01 |
| cg16323245 | <i>ZBTB20</i>    | chr3  | 5'UTR   | 0.97 | (0.48; 1.98) | 9.4E-01 |
| cg00409812 | <i>CACNA1C</i>   | chr12 | Body    | 0.98 | (0.56; 1.71) | 9.4E-01 |
| cg01955203 | <i>FBXO32</i>    | chr8  | 3'UTR   | 0.99 | (0.69; 1.4)  | 9.4E-01 |
| cg26896499 | <i>SUSD4</i>     | chr1  | Body    | 1.01 | (0.72; 1.42) | 9.4E-01 |
| cg18293555 | <i>RTN4R</i>     | chr22 | Body    | 0.99 | (0.69; 1.4)  | 9.4E-01 |
| cg27609967 | <i>ELAVL4</i>    | chr1  | 1stExon | 1.02 | (0.59; 1.77) | 9.4E-01 |
| cg27609967 | <i>ELAVL4</i>    | chr1  | Body    | 1.02 | (0.59; 1.77) | 9.4E-01 |
| cg27609967 | <i>ELAVL4</i>    | chr1  | 5'UTR   | 1.02 | (0.59; 1.77) | 9.4E-01 |
| cg00674848 | <i>CREBBP</i>    | chr16 | Body    | 0.98 | (0.67; 1.45) | 9.4E-01 |
| cg19334350 | <i>PTPRN2</i>    | chr7  | Body    | 0.98 | (0.66; 1.47) | 9.4E-01 |
| cg27503577 | <i>TNRC6C</i>    | chr17 | Body    | 1.01 | (0.71; 1.44) | 9.4E-01 |
| cg01123783 | <i>CNTNAP2</i>   | chr7  | Body    | 0.99 | (0.72; 1.35) | 9.4E-01 |
| cg11879902 | <i>CACNA1C</i>   | chr12 | Body    | 1.01 | (0.72; 1.42) | 9.4E-01 |
| cg12971683 | <i>ARID1A</i>    | chr1  | Body    | 1.02 | (0.68; 1.51) | 9.4E-01 |
| cg03361379 | <i>PTPRN2</i>    | chr7  | Body    | 0.98 | (0.63; 1.53) | 9.4E-01 |
| cg11073447 | <i>CUX2</i>      | chr12 | Body    | 1.01 | (0.75; 1.37) | 9.4E-01 |
| cg11918372 | <i>FBXO11</i>    | chr2  | 5'UTR   | 1.01 | (0.74; 1.39) | 9.4E-01 |



|               |                |       |         |      |              |         |
|---------------|----------------|-------|---------|------|--------------|---------|
| cg11918372    | <i>FBXO11</i>  | chr2  | 1stExon | 1.01 | (0.74; 1.39) | 9.4E-01 |
| cg03088104    | <i>FBXO34</i>  | chr14 | 1stExon | 1.01 | (0.75; 1.36) | 9.4E-01 |
| cg03088104    | <i>FBXO34</i>  | chr14 | TSS1500 | 1.01 | (0.75; 1.36) | 9.4E-01 |
| cg03088104    | <i>FBXO34</i>  | chr14 | 5'UTR   | 1.01 | (0.75; 1.36) | 9.4E-01 |
| cg13878536    | <i>PTPRN2</i>  | chr7  | Body    | 0.98 | (0.66; 1.47) | 9.4E-01 |
| cg24589514    | <i>FBXO33</i>  | chr14 | 1stExon | 0.99 | (0.7; 1.39)  | 9.4E-01 |
| cg20595490    | <i>MBD5</i>    | chr2  | TSS1500 | 1.01 | (0.71; 1.45) | 9.4E-01 |
| cg01255782    | <i>CPEB1</i>   | chr15 | Body    | 0.99 | (0.66; 1.47) | 9.4E-01 |
| cg19505398    | <i>DDHD2</i>   | chr8  | ExonBnd | 0.99 | (0.66; 1.47) | 9.4E-01 |
| cg19505398    | <i>DDHD2</i>   | chr8  | Body    | 0.99 | (0.66; 1.47) | 9.4E-01 |
| cg08247053    | <i>CSMD2</i>   | chr1  | Body    | 0.99 | (0.72; 1.35) | 9.4E-01 |
| cg12577925    | <i>DNAI2</i>   | chr17 | 5'UTR   | 0.98 | (0.55; 1.75) | 9.4E-01 |
| cg26220316    | <i>CTDSPL2</i> | chr15 | Body    | 0.99 | (0.7; 1.38)  | 9.4E-01 |
| cg02373104    | <i>CNTNAP2</i> | chr7  | Body    | 1.01 | (0.73; 1.4)  | 9.4E-01 |
| cg07317983    | <i>ZBTB20</i>  | chr3  | TSS1500 | 1.01 | (0.72; 1.42) | 9.4E-01 |
| cg07317983    | <i>ZBTB20</i>  | chr3  | 5'UTR   | 1.01 | (0.72; 1.42) | 9.4E-01 |
| cg15535177    | <i>AKAP13</i>  | chr15 | Body    | 0.98 | (0.65; 1.5)  | 9.4E-01 |
| cg17975235    | <i>ZNF704</i>  | chr8  | Body    | 1.02 | (0.63; 1.64) | 9.4E-01 |
| cg27299588    | <i>PTPRS</i>   | chr19 | Body    | 1.02 | (0.64; 1.62) | 9.4E-01 |
| cg11373212    | <i>CTDSPL</i>  | chr3  | Body    | 1.03 | (0.41; 2.6)  | 9.4E-01 |
| cg15928247    | <i>UBE2E2</i>  | chr3  | Body    | 0.99 | (0.69; 1.41) | 9.4E-01 |
| cg18581392    | <i>CUX2</i>    | chr12 | Body    | 1.02 | (0.66; 1.57) | 9.4E-01 |
| cg09794469    | <i>TNRC18</i>  | chr7  | Body    | 1.01 | (0.71; 1.45) | 9.4E-01 |
| cg07846348    | <i>TENM2</i>   | chr5  | Body    | 0.99 | (0.73; 1.35) | 9.4E-01 |
| cg12329318    | <i>COL5A2</i>  | chr2  | Body    | 0.99 | (0.67; 1.44) | 9.4E-01 |
| cg25221496    | <i>MEIS2</i>   | chr15 | Body    | 1.01 | (0.73; 1.4)  | 9.4E-01 |
| cg08297140    | <i>FBXO32</i>  | chr8  | TSS1500 | 0.99 | (0.74; 1.33) | 9.4E-01 |
| cg07144984    | <i>ZBTB20</i>  | chr3  | 5'UTR   | 1.01 | (0.69; 1.48) | 9.4E-01 |
| cg09592903    | <i>RTN4</i>    | chr2  | Body    | 1.01 | (0.75; 1.36) | 9.4E-01 |
| cg07135835    | <i>CUX2</i>    | chr12 | Body    | 0.97 | (0.39; 2.4)  | 9.4E-01 |
| cg00841784    | <i>UBE2E2</i>  | chr3  | Body    | 0.99 | (0.72; 1.36) | 9.4E-01 |
| cg12860753    | <i>FBXO33</i>  | chr14 | Body    | 1.01 | (0.72; 1.42) | 9.4E-01 |
| cg05765703    | <i>PTPRN2</i>  | chr7  | Body    | 1.01 | (0.75; 1.36) | 9.4E-01 |
| cg25406735    | <i>FBXO32</i>  | chr8  | 1stExon | 1.01 | (0.76; 1.35) | 9.4E-01 |
| cg22380476    | <i>CTDSPL</i>  | chr3  | Body    | 0.99 | (0.66; 1.48) | 9.4E-01 |
| ch.7.3089487R | <i>CNTNAP2</i> | chr7  | Body    | 1.01 | (0.73; 1.4)  | 9.4E-01 |
| cg25496967    | <i>CSMD2</i>   | chr1  | TSS200  | 1.01 | (0.68; 1.51) | 9.4E-01 |
| cg25496967    | <i>CSMD2</i>   | chr1  | Body    | 1.01 | (0.68; 1.51) | 9.4E-01 |
| cg21931713    | <i>PEX14</i>   | chr1  | Body    | 1.02 | (0.62; 1.68) | 9.4E-01 |
| cg27200730    | <i>CDH13</i>   | chr16 | Body    | 1.01 | (0.74; 1.39) | 9.4E-01 |
| cg21926698    | <i>EIF2S1</i>  | chr14 | TSS1500 | 0.99 | (0.7; 1.4)   | 9.4E-01 |
| cg23762306    | <i>CREBBP</i>  | chr16 | Body    | 1.02 | (0.66; 1.57) | 9.4E-01 |
| cg07365274    | <i>ZBTB20</i>  | chr3  | TSS200  | 1.01 | (0.74; 1.38) | 9.4E-01 |
| cg11803278    | <i>PTPRN2</i>  | chr7  | Body    | 0.99 | (0.73; 1.33) | 9.4E-01 |
| cg04078093    | <i>PTPRS</i>   | chr19 | Body    | 0.98 | (0.64; 1.52) | 9.4E-01 |
| cg15092544    | <i>RAP1B</i>   | chr12 | 5'UTR   | 1.01 | (0.76; 1.35) | 9.4E-01 |
| cg15092544    | <i>RAP1B</i>   | chr12 | 1stExon | 1.01 | (0.76; 1.35) | 9.4E-01 |
| cg18159323    | <i>PTPRN2</i>  | chr7  | Body    | 1.01 | (0.7; 1.47)  | 9.4E-01 |
| cg12844290    | <i>CUX2</i>    | chr12 | Body    | 1.01 | (0.73; 1.41) | 9.4E-01 |
| cg22824674    | <i>PTPRN2</i>  | chr7  | Body    | 1.01 | (0.73; 1.4)  | 9.4E-01 |
| cg14826185    | <i>TENM2</i>   | chr5  | Body    | 0.99 | (0.73; 1.34) | 9.4E-01 |
| cg22598247    | <i>PTPRN2</i>  | chr7  | Body    | 1.01 | (0.72; 1.42) | 9.5E-01 |
| cg05503905    | <i>CSMD2</i>   | chr1  | Body    | 1.02 | (0.66; 1.55) | 9.5E-01 |
| cg11412766    | <i>RTN4</i>    | chr2  | Body    | 0.98 | (0.62; 1.56) | 9.5E-01 |
| cg11412766    | <i>RTN4</i>    | chr2  | 1stExon | 0.98 | (0.62; 1.56) | 9.5E-01 |
| cg11412766    | <i>RTN4</i>    | chr2  | 5'UTR   | 0.98 | (0.62; 1.56) | 9.5E-01 |
| cg05204754    | <i>NOL4L</i>   | chr20 | Body    | 1.02 | (0.58; 1.8)  | 9.5E-01 |
| cg07526221    | <i>ACVR2A</i>  | chr2  | Body    | 1.01 | (0.75; 1.36) | 9.5E-01 |
| cg22402902    | <i>RTN4RL1</i> | chr17 | 1stExon | 1.01 | (0.75; 1.37) | 9.5E-01 |
| cg22402902    | <i>RTN4RL1</i> | chr17 | 5'UTR   | 1.01 | (0.75; 1.37) | 9.5E-01 |
| cg01199923    | <i>CSMD2</i>   | chr1  | Body    | 0.99 | (0.68; 1.44) | 9.5E-01 |



|            |           |       |         |      |              |         |
|------------|-----------|-------|---------|------|--------------|---------|
| cg27210764 | WVOX      | chr16 | Body    | 0.99 | (0.71; 1.38) | 9.5E-01 |
| cg23300267 | CUX2      | chr12 | 3'UTR   | 0.99 | (0.67; 1.45) | 9.5E-01 |
| cg17142404 | RTN4RL1   | chr17 | 3'UTR   | 0.99 | (0.64; 1.51) | 9.5E-01 |
| cg12976399 | CHD6      | chr20 | Body    | 0.99 | (0.7; 1.39)  | 9.5E-01 |
| cg20572472 | ERI3      | chr1  | Body    | 1.01 | (0.69; 1.49) | 9.5E-01 |
| cg17336584 | PHACTR1   | chr6  | Body    | 1.01 | (0.67; 1.53) | 9.5E-01 |
| cg14425722 | ACVR2A    | chr2  | TSS1500 | 1.01 | (0.72; 1.41) | 9.5E-01 |
| cg10688790 | CNTNAP2   | chr7  | Body    | 0.99 | (0.73; 1.34) | 9.5E-01 |
| cg20525229 | CUX2      | chr12 | Body    | 1.01 | (0.73; 1.41) | 9.5E-01 |
| cg05410763 | FBXO31    | chr16 | Body    | 0.99 | (0.72; 1.36) | 9.5E-01 |
| cg05410763 | FBXO31    | chr16 | 5'UTR   | 0.99 | (0.72; 1.36) | 9.5E-01 |
| cg06453997 | MTNR1A    | chr4  | Body    | 1.01 | (0.74; 1.38) | 9.5E-01 |
| cg03740132 | CNTNAP2   | chr7  | Body    | 0.99 | (0.71; 1.38) | 9.5E-01 |
| cg19606289 | AKAP13    | chr15 | 5'UTR   | 1.02 | (0.61; 1.69) | 9.5E-01 |
| cg13798112 | ZBTB20    | chr3  | Body    | 1.01 | (0.72; 1.41) | 9.5E-01 |
| cg16884099 | PTPRN2    | chr7  | Body    | 0.99 | (0.71; 1.37) | 9.5E-01 |
| cg09955928 | MBD5      | chr2  | 5'UTR   | 0.99 | (0.66; 1.48) | 9.5E-01 |
| cg16933578 | EIF2S1    | chr14 | TSS1500 | 1.01 | (0.71; 1.44) | 9.5E-01 |
| cg00550052 | WVOX      | chr16 | Body    | 1.01 | (0.71; 1.44) | 9.5E-01 |
| cg25919797 | PTPRN2    | chr7  | Body    | 1.01 | (0.75; 1.36) | 9.5E-01 |
| cg02619005 | FBXO31    | chr16 | Body    | 1.01 | (0.73; 1.39) | 9.5E-01 |
| cg05861697 | RTN4RL1   | chr17 | Body    | 0.99 | (0.74; 1.32) | 9.5E-01 |
| cg24111259 | ZBTB20    | chr3  | Body    | 0.99 | (0.67; 1.46) | 9.5E-01 |
| cg24111259 | ZBTB20    | chr3  | 3'UTR   | 0.99 | (0.67; 1.46) | 9.5E-01 |
| cg05130081 | PTPRN2    | chr7  | Body    | 0.99 | (0.73; 1.33) | 9.5E-01 |
| cg21608691 | PTPRN2    | chr7  | Body    | 0.99 | (0.73; 1.34) | 9.5E-01 |
| cg01820285 | CACNA1C   | chr12 | Body    | 1.01 | (0.68; 1.52) | 9.5E-01 |
| cg05939647 | UBE2E2    | chr3  | Body    | 0.99 | (0.73; 1.34) | 9.5E-01 |
| cg00747661 | CREBBP    | chr16 | TSS1500 | 1.01 | (0.73; 1.4)  | 9.5E-01 |
| cg16657615 | TNFRSF12A | chr16 | Body    | 1.01 | (0.75; 1.37) | 9.5E-01 |
| cg02054964 | PTPRN2    | chr7  | Body    | 1.01 | (0.73; 1.39) | 9.5E-01 |
| cg07465794 | PTPRN2    | chr7  | Body    | 0.99 | (0.71; 1.37) | 9.5E-01 |
| cg12084076 | NOL4      | chr18 | TSS1500 | 1.01 | (0.68; 1.5)  | 9.5E-01 |
| cg12084076 | NOL4      | chr18 | TSS200  | 1.01 | (0.68; 1.5)  | 9.5E-01 |
| cg07354008 | PTPRN2    | chr7  | Body    | 1.01 | (0.74; 1.38) | 9.5E-01 |
| cg08898446 | TNRC6C    | chr17 | Body    | 1.01 | (0.76; 1.34) | 9.5E-01 |
| cg06848521 | PTPRN2    | chr7  | Body    | 0.99 | (0.65; 1.5)  | 9.5E-01 |
| cg25196812 | POU2F1    | chr1  | Body    | 1.01 | (0.68; 1.52) | 9.5E-01 |
| cg25196812 | POU2F1    | chr1  | TSS1500 | 1.01 | (0.68; 1.52) | 9.5E-01 |
| cg14492551 | TENM2     | chr5  | Body    | 1.01 | (0.65; 1.58) | 9.5E-01 |
| cg13229363 | PTPRN2    | chr7  | Body    | 0.99 | (0.73; 1.34) | 9.5E-01 |
| cg20522673 | ATP8A1    | chr4  | Body    | 0.99 | (0.64; 1.53) | 9.5E-01 |
| cg04577657 | CPEB1     | chr15 | Body    | 1.01 | (0.74; 1.39) | 9.5E-01 |
| cg04577657 | CPEB1     | chr15 | 5'UTR   | 1.01 | (0.74; 1.39) | 9.5E-01 |
| cg17955126 | SGIP1     | chr1  | Body    | 1.01 | (0.75; 1.36) | 9.5E-01 |
| cg12558358 | UBE2E2    | chr3  | 5'UTR   | 0.99 | (0.69; 1.42) | 9.5E-01 |
| cg12558358 | UBE2E2    | chr3  | 1stExon | 0.99 | (0.69; 1.42) | 9.5E-01 |
| cg05430201 | SGIP1     | chr1  | Body    | 1.01 | (0.63; 1.63) | 9.5E-01 |
| cg15208525 | CNTNAP2   | chr7  | Body    | 1.01 | (0.68; 1.51) | 9.5E-01 |
| cg01960233 | TNRC6B    | chr22 | Body    | 0.99 | (0.73; 1.35) | 9.5E-01 |
| cg10117016 | ERI3      | chr1  | Body    | 1.01 | (0.73; 1.39) | 9.5E-01 |
| cg24990327 | CNTNAP2   | chr7  | Body    | 1.01 | (0.68; 1.5)  | 9.5E-01 |
| cg20190127 | CACNA1C   | chr12 | Body    | 1.01 | (0.69; 1.48) | 9.5E-01 |
| cg20696049 | PTPRN2    | chr7  | Body    | 1.01 | (0.68; 1.52) | 9.5E-01 |
| cg22239322 | TENM2     | chr5  | Body    | 0.99 | (0.62; 1.58) | 9.5E-01 |
| cg04850976 | CREBBP    | chr16 | Body    | 0.99 | (0.64; 1.51) | 9.5E-01 |
| cg15771432 | PTPRN2    | chr7  | Body    | 0.99 | (0.67; 1.46) | 9.5E-01 |
| cg25378818 | POU2F1    | chr1  | TSS200  | 0.99 | (0.7; 1.41)  | 9.5E-01 |
| cg25378818 | POU2F1    | chr1  | TSS1500 | 0.99 | (0.7; 1.41)  | 9.5E-01 |
| cg25215295 | BRUNOL4   | chr18 | Body    | 1.01 | (0.72; 1.42) | 9.5E-01 |
| cg00120481 | CUX2      | chr12 | Body    | 1.01 | (0.63; 1.63) | 9.5E-01 |



|            |                  |       |         |      |              |         |
|------------|------------------|-------|---------|------|--------------|---------|
| cg24258439 | <i>TNFRSF11A</i> | chr18 | Body    | 0.99 | (0.74; 1.34) | 9.5E-01 |
| cg19796617 | <i>CNTNAP2</i>   | chr7  | Body    | 1.01 | (0.75; 1.36) | 9.5E-01 |
| cg01056853 | <i>PHACTR1</i>   | chr6  | Body    | 0.99 | (0.68; 1.45) | 9.5E-01 |
| cg09364373 | <i>SGIP1</i>     | chr1  | Body    | 1.01 | (0.74; 1.38) | 9.5E-01 |
| cg05966059 | <i>UNC80</i>     | chr2  | Body    | 1.01 | (0.72; 1.42) | 9.5E-01 |
| cg11449777 | <i>CHCHD6</i>    | chr3  | Body    | 1.01 | (0.72; 1.41) | 9.5E-01 |
| cg09916651 | <i>CUX2</i>      | chr12 | Body    | 0.99 | (0.6; 1.62)  | 9.5E-01 |
| cg13937841 | <i>WAC</i>       | chr10 | TSS1500 | 1.01 | (0.75; 1.36) | 9.5E-01 |
| cg09527886 | <i>GNA12</i>     | chr7  | Body    | 0.99 | (0.68; 1.44) | 9.5E-01 |
| cg14743683 | <i>PTPRN2</i>    | chr7  | Body    | 1.01 | (0.75; 1.36) | 9.5E-01 |
| cg25594390 | <i>EIF2S1</i>    | chr14 | TSS1500 | 1.01 | (0.73; 1.4)  | 9.5E-01 |
| cg08527313 | <i>PTPRU</i>     | chr1  | Body    | 1.01 | (0.74; 1.38) | 9.5E-01 |
| cg01169981 | <i>PDE8A</i>     | chr15 | Body    | 0.99 | (0.69; 1.41) | 9.5E-01 |
| cg11811816 | <i>CUX2</i>      | chr12 | Body    | 1.01 | (0.72; 1.41) | 9.5E-01 |
| cg05454781 | <i>PEX14</i>     | chr1  | Body    | 0.98 | (0.45; 2.11) | 9.5E-01 |
| cg01371842 | <i>PTPRN2</i>    | chr7  | Body    | 0.99 | (0.71; 1.38) | 9.5E-01 |
| cg27508180 | <i>COL1A2</i>    | chr7  | Body    | 0.99 | (0.71; 1.37) | 9.5E-01 |
| cg10079022 | <i>CDH13</i>     | chr16 | Body    | 1.01 | (0.7; 1.47)  | 9.5E-01 |
| cg26944382 | <i>NOL4</i>      | chr18 | Body    | 0.99 | (0.7; 1.4)   | 9.5E-01 |
| cg26944382 | <i>NOL4</i>      | chr18 | TSS200  | 0.99 | (0.7; 1.4)   | 9.5E-01 |
| cg23877344 | <i>WWOX</i>      | chr16 | Body    | 1.01 | (0.72; 1.41) | 9.6E-01 |
| cg01253289 | <i>PTPRU</i>     | chr1  | Body    | 1.01 | (0.73; 1.39) | 9.6E-01 |
| cg23165166 | <i>COL5A2</i>    | chr2  | Body    | 0.99 | (0.64; 1.52) | 9.6E-01 |
| cg22530232 | <i>PTPRN2</i>    | chr7  | Body    | 1.01 | (0.72; 1.42) | 9.6E-01 |
| cg05926314 | <i>PTPRN2</i>    | chr7  | Body    | 1.01 | (0.76; 1.34) | 9.6E-01 |
| cg18081171 | <i>ALCAM</i>     | chr3  | Body    | 1.01 | (0.75; 1.36) | 9.6E-01 |
| cg17537683 | <i>RTN4</i>      | chr2  | Body    | 0.99 | (0.67; 1.45) | 9.6E-01 |
| cg17436727 | <i>TAOK3</i>     | chr12 | 5'UTR   | 1.01 | (0.68; 1.5)  | 9.6E-01 |
| cg24241410 | <i>PTPRN2</i>    | chr7  | Body    | 1.01 | (0.74; 1.38) | 9.6E-01 |
| cg16345171 | <i>BRUNOL4</i>   | chr18 | Body    | 0.99 | (0.72; 1.36) | 9.6E-01 |
| cg10611831 | <i>CACNA1C</i>   | chr12 | Body    | 1.01 | (0.66; 1.54) | 9.6E-01 |
| cg04507925 | <i>UNC80</i>     | chr2  | Body    | 1.01 | (0.64; 1.6)  | 9.6E-01 |
| cg10397322 | <i>UBE2E2</i>    | chr3  | TSS1500 | 1.01 | (0.65; 1.57) | 9.6E-01 |
| cg15035217 | <i>PTPRN2</i>    | chr7  | Body    | 1.01 | (0.71; 1.43) | 9.6E-01 |
| cg23431382 | <i>MEIS2</i>     | chr15 | Body    | 1.01 | (0.7; 1.45)  | 9.6E-01 |
| cg13453162 | <i>CDH13</i>     | chr16 | 5'UTR   | 1.01 | (0.72; 1.41) | 9.6E-01 |
| cg13453162 | <i>CDH13</i>     | chr16 | Body    | 1.01 | (0.72; 1.41) | 9.6E-01 |
| cg25483140 | <i>FBXO34</i>    | chr14 | 5'UTR   | 0.99 | (0.72; 1.37) | 9.6E-01 |
| cg24429310 | <i>CNTNAP2</i>   | chr7  | Body    | 1.01 | (0.71; 1.43) | 9.6E-01 |
| cg09319617 | <i>TNR</i>       | chr1  | 5'UTR   | 0.99 | (0.68; 1.43) | 9.6E-01 |
| cg16358867 | <i>DNAI2</i>     | chr17 | Body    | 1.01 | (0.62; 1.66) | 9.6E-01 |
| cg10368284 | <i>CACNA1C</i>   | chr12 | Body    | 0.99 | (0.7; 1.41)  | 9.6E-01 |
| cg09993929 | <i>CACNA1C</i>   | chr12 | Body    | 1.01 | (0.7; 1.45)  | 9.6E-01 |
| cg06645081 | <i>PDE8A</i>     | chr15 | 5'UTR   | 1.01 | (0.71; 1.43) | 9.6E-01 |
| cg06645081 | <i>PDE8A</i>     | chr15 | Body    | 1.01 | (0.71; 1.43) | 9.6E-01 |
| cg13342684 | <i>MEIS2</i>     | chr15 | Body    | 1.01 | (0.71; 1.43) | 9.6E-01 |
| cg01010931 | <i>CREBBP</i>    | chr16 | Body    | 0.99 | (0.72; 1.36) | 9.6E-01 |
| cg09497103 | <i>ERI3</i>      | chr1  | Body    | 0.99 | (0.71; 1.38) | 9.6E-01 |
| cg20060394 | <i>HMGB4</i>     | chr1  | 5'UTR   | 1.01 | (0.74; 1.38) | 9.6E-01 |
| cg20060394 | <i>HMGB4</i>     | chr1  | TSS1500 | 1.01 | (0.74; 1.38) | 9.6E-01 |
| cg20060394 | <i>CSMD2</i>     | chr1  | Body    | 1.01 | (0.74; 1.38) | 9.6E-01 |
| cg04132731 | <i>WWOX</i>      | chr16 | Body    | 0.98 | (0.49; 1.95) | 9.6E-01 |
| cg10099415 | <i>NRXN1</i>     | chr2  | Body    | 0.99 | (0.69; 1.43) | 9.6E-01 |
| cg10099415 | <i>NRXN1</i>     | chr2  | TSS200  | 0.99 | (0.69; 1.43) | 9.6E-01 |
| cg19098763 | <i>ELAVL4</i>    | chr1  | TSS200  | 1.01 | (0.65; 1.58) | 9.6E-01 |
| cg08425543 | <i>NRXN1</i>     | chr2  | Body    | 0.99 | (0.73; 1.34) | 9.6E-01 |
| cg16562619 | <i>WWOX</i>      | chr16 | Body    | 0.99 | (0.72; 1.37) | 9.6E-01 |
| cg11980493 | <i>ARID1A</i>    | chr1  | Body    | 0.98 | (0.52; 1.87) | 9.6E-01 |
| cg14886857 | <i>MEIS2</i>     | chr15 | Body    | 0.99 | (0.71; 1.39) | 9.6E-01 |
| cg18145806 | <i>TNFRSF10D</i> | chr8  | TSS1500 | 1.01 | (0.73; 1.39) | 9.6E-01 |
| cg09949366 | <i>PHACTR1</i>   | chr6  | Body    | 1.01 | (0.68; 1.5)  | 9.6E-01 |



|            |             |       |         |      |              |         |
|------------|-------------|-------|---------|------|--------------|---------|
| cg08364730 | CREBBP      | chr16 | Body    | 0.99 | (0.67; 1.46) | 9.6E-01 |
| cg01354866 | NRXN1       | chr2  | Body    | 1.01 | (0.71; 1.42) | 9.6E-01 |
| cg08592146 | FBXO38      | chr5  | TSS200  | 1.01 | (0.7; 1.46)  | 9.6E-01 |
| cg05112254 | CACNA1C     | chr12 | Body    | 0.99 | (0.62; 1.58) | 9.6E-01 |
| cg23641032 | TNR         | chr1  | 5'UTR   | 0.99 | (0.55; 1.75) | 9.6E-01 |
| cg11003780 | PTPRN2      | chr7  | Body    | 0.99 | (0.71; 1.38) | 9.6E-01 |
| cg11208376 | WVOX        | chr16 | Body    | 0.99 | (0.74; 1.34) | 9.6E-01 |
| cg09592430 | CNTNAP2     | chr7  | Body    | 0.99 | (0.68; 1.44) | 9.6E-01 |
| cg05344902 | SUGCT       | chr7  | Body    | 1.01 | (0.68; 1.49) | 9.6E-01 |
| cg02225855 | AKAP13      | chr15 | Body    | 1.01 | (0.75; 1.36) | 9.6E-01 |
| cg15439377 | CACNA1C-IT2 | chr12 | TSS200  | 1.01 | (0.68; 1.49) | 9.6E-01 |
| cg09279763 | GNA12       | chr7  | Body    | 1.01 | (0.73; 1.4)  | 9.6E-01 |
| cg04797180 | TENM2       | chr5  | Body    | 1.01 | (0.59; 1.73) | 9.6E-01 |
| cg18640966 | CSMD2       | chr1  | Body    | 1.01 | (0.63; 1.61) | 9.6E-01 |
| cg08374341 | CNTNAP2     | chr7  | Body    | 0.99 | (0.73; 1.36) | 9.6E-01 |
| cg17139035 | DDHD2       | chr8  | TSS1500 | 0.99 | (0.74; 1.33) | 9.6E-01 |
| cg15031780 | PEX14       | chr1  | Body    | 0.99 | (0.74; 1.33) | 9.6E-01 |
| cg22291711 | MEIS2       | chr15 | Body    | 1.01 | (0.67; 1.53) | 9.6E-01 |
| cg02495250 | CDH13       | chr16 | Body    | 0.99 | (0.71; 1.38) | 9.6E-01 |
| cg08279304 | CTDSPL2     | chr15 | TSS200  | 0.99 | (0.71; 1.38) | 9.6E-01 |
| cg17152355 | AKAP13      | chr15 | Body    | 1.01 | (0.7; 1.45)  | 9.6E-01 |
| cg04670922 | PTPRN2      | chr7  | Body    | 0.99 | (0.66; 1.49) | 9.6E-01 |
| cg03694569 | DMXL2       | chr15 | Body    | 0.99 | (0.68; 1.44) | 9.6E-01 |
| cg13348293 | WAC         | chr10 | TSS1500 | 1.01 | (0.74; 1.36) | 9.6E-01 |
| cg13348293 | WAC         | chr10 | Body    | 1.01 | (0.74; 1.36) | 9.6E-01 |
| cg09315614 | TNFRSF19    | chr13 | 5'UTR   | 1.01 | (0.71; 1.44) | 9.6E-01 |
| cg05233160 | PDE8A       | chr15 | Body    | 1.01 | (0.7; 1.44)  | 9.6E-01 |
| cg00627447 | CDH13       | chr16 | 5'UTR   | 0.99 | (0.71; 1.4)  | 9.6E-01 |
| cg00627447 | CDH13       | chr16 | Body    | 0.99 | (0.71; 1.4)  | 9.6E-01 |
| cg00238283 | PTPRN2      | chr7  | Body    | 1.01 | (0.74; 1.38) | 9.6E-01 |
| cg08678429 | CHD6        | chr20 | TSS1500 | 0.99 | (0.73; 1.36) | 9.6E-01 |
| cg03023681 | FBXO32      | chr8  | Body    | 0.99 | (0.72; 1.36) | 9.6E-01 |
| cg24173411 | ALCAM       | chr3  | TSS1500 | 0.99 | (0.72; 1.36) | 9.6E-01 |
| cg10589720 | DACH1       | chr13 | Body    | 0.99 | (0.64; 1.53) | 9.7E-01 |
| cg12563520 | COL1A2      | chr7  | Body    | 1.01 | (0.68; 1.49) | 9.7E-01 |
| cg05378324 | WAC         | chr10 | TSS200  | 1.01 | (0.74; 1.38) | 9.7E-01 |
| cg05378324 | WAC         | chr10 | 5'UTR   | 1.01 | (0.74; 1.38) | 9.7E-01 |
| cg17838516 | MTNR1B      | chr11 | Body    | 1.01 | (0.74; 1.37) | 9.7E-01 |
| cg00478362 | POU2F1      | chr1  | Body    | 1.01 | (0.7; 1.45)  | 9.7E-01 |
| cg05965106 | TSHZ3       | chr19 | Body    | 0.99 | (0.7; 1.4)   | 9.7E-01 |
| cg25758137 | ALCAM       | chr3  | Body    | 0.99 | (0.68; 1.46) | 9.7E-01 |
| cg08917738 | RTN4RL1     | chr17 | Body    | 1.01 | (0.71; 1.43) | 9.7E-01 |
| cg05386140 | MEX3A       | chr1  | Body    | 1.01 | (0.63; 1.61) | 9.7E-01 |
| cg25553638 | CUX2        | chr12 | Body    | 1.01 | (0.71; 1.43) | 9.7E-01 |
| cg20033731 | CACNA1C     | chr12 | TSS1500 | 0.99 | (0.63; 1.56) | 9.7E-01 |
| cg00572756 | PTPRN2      | chr7  | Body    | 0.99 | (0.7; 1.42)  | 9.7E-01 |
| cg00395277 | ATP8A1      | chr4  | Body    | 1.01 | (0.65; 1.56) | 9.7E-01 |
| cg06263843 | CPEB1       | chr15 | 1stExon | 1.01 | (0.68; 1.49) | 9.7E-01 |
| cg06263843 | CPEB1       | chr15 | Body    | 1.01 | (0.68; 1.49) | 9.7E-01 |
| cg06263843 | CPEB1       | chr15 | 5'UTR   | 1.01 | (0.68; 1.49) | 9.7E-01 |
| cg27308130 | CHCHD6      | chr3  | TSS1500 | 1.01 | (0.75; 1.35) | 9.7E-01 |
| cg08690482 | CPEB1       | chr15 | TSS200  | 0.99 | (0.7; 1.41)  | 9.7E-01 |
| cg08690482 | CPEB1       | chr15 | Body    | 0.99 | (0.7; 1.41)  | 9.7E-01 |
| cg00927495 | BARX1       | chr9  | Body    | 0.99 | (0.7; 1.41)  | 9.7E-01 |
| cg06671146 | ZBTB20      | chr3  | 5'UTR   | 0.99 | (0.68; 1.45) | 9.7E-01 |
| cg06106126 | MTNR1B      | chr11 | Body    | 1.01 | (0.69; 1.47) | 9.7E-01 |
| cg11156416 | TNRC6B      | chr22 | Body    | 0.99 | (0.51; 1.92) | 9.7E-01 |
| cg12917938 | CHFR        | chr12 | Body    | 1.01 | (0.73; 1.39) | 9.7E-01 |
| cg06749295 | NRXN1       | chr2  | Body    | 1.01 | (0.7; 1.46)  | 9.7E-01 |
| cg03734058 | PTPRN2      | chr7  | Body    | 0.99 | (0.5; 1.94)  | 9.7E-01 |
| cg23535882 | AKAP13      | chr15 | Body    | 1.01 | (0.68; 1.49) | 9.7E-01 |



|               |                  |       |         |      |              |         |
|---------------|------------------|-------|---------|------|--------------|---------|
| cg14838474    | <i>RECQL</i>     | chr12 | 1stExon | 0.99 | (0.73; 1.35) | 9.7E-01 |
| cg14838474    | <i>GOLT1B</i>    | chr12 | TSS1500 | 0.99 | (0.73; 1.35) | 9.7E-01 |
| cg14838474    | <i>RECQL</i>     | chr12 | 5'UTR   | 0.99 | (0.73; 1.35) | 9.7E-01 |
| cg26663279    | <i>CHCHD6</i>    | chr3  | Body    | 0.99 | (0.71; 1.39) | 9.7E-01 |
| cg21584710    | <i>DNAI2</i>     | chr17 | Body    | 0.99 | (0.69; 1.42) | 9.7E-01 |
| cg08110076    | <i>CDH11</i>     | chr16 | Body    | 0.99 | (0.7; 1.41)  | 9.7E-01 |
| cg15064873    | <i>TXNDC9</i>    | chr2  | TSS200  | 0.99 | (0.71; 1.39) | 9.7E-01 |
| cg25764700    | <i>NOL4L</i>     | chr20 | Body    | 0.99 | (0.7; 1.41)  | 9.7E-01 |
| cg16363189    | <i>SCAF8</i>     | chr6  | Body    | 0.99 | (0.66; 1.48) | 9.7E-01 |
| cg12948619    | <i>CUX2</i>      | chr12 | Body    | 0.99 | (0.63; 1.56) | 9.7E-01 |
| cg22001533    | <i>NRXN1</i>     | chr2  | Body    | 0.99 | (0.62; 1.58) | 9.7E-01 |
| cg22001533    | <i>NRXN1</i>     | chr2  | 1stExon | 0.99 | (0.62; 1.58) | 9.7E-01 |
| cg22001533    | <i>NRXN1</i>     | chr2  | 5'UTR   | 0.99 | (0.62; 1.58) | 9.7E-01 |
| cg14307471    | <i>NOL4</i>      | chr18 | 3'UTR   | 1.01 | (0.72; 1.41) | 9.7E-01 |
| cg17764549    | <i>PTPRN2</i>    | chr7  | Body    | 0.99 | (0.69; 1.42) | 9.7E-01 |
| cg21649205    | <i>PTPRN2</i>    | chr7  | Body    | 1.01 | (0.73; 1.39) | 9.7E-01 |
| ch.16.759907F | <i>TNRC6A</i>    | chr16 | Body    | 0.99 | (0.51; 1.91) | 9.7E-01 |
| cg13538517    | <i>PTPRN2</i>    | chr7  | Body    | 0.99 | (0.72; 1.38) | 9.7E-01 |
| cg20284508    | <i>CHCHD6</i>    | chr3  | Body    | 0.99 | (0.74; 1.34) | 9.7E-01 |
| cg17896072    | <i>BARX2</i>     | chr11 | Body    | 1.01 | (0.73; 1.39) | 9.7E-01 |
| cg07303259    | <i>WVOX</i>      | chr16 | Body    | 0.99 | (0.73; 1.36) | 9.7E-01 |
| cg17599236    | <i>SMARCD3</i>   | chr7  | TSS1500 | 1.01 | (0.58; 1.77) | 9.7E-01 |
| cg17599236    | <i>SMARCD3</i>   | chr7  | Body    | 1.01 | (0.58; 1.77) | 9.7E-01 |
| cg13759328    | <i>CDH13</i>     | chr16 | Body    | 1.01 | (0.61; 1.66) | 9.7E-01 |
| cg09369524    | <i>WVOX</i>      | chr16 | Body    | 0.99 | (0.71; 1.39) | 9.7E-01 |
| cg05664127    | <i>ATF7IP2</i>   | chr16 | 3'UTR   | 1.01 | (0.71; 1.43) | 9.7E-01 |
| cg04996300    | <i>PTPRN2</i>    | chr7  | Body    | 1.01 | (0.74; 1.37) | 9.7E-01 |
| cg17563447    | <i>POU2F1</i>    | chr1  | Body    | 0.98 | (0.44; 2.21) | 9.7E-01 |
| cg01164618    | <i>WVOX</i>      | chr16 | Body    | 1.01 | (0.71; 1.43) | 9.7E-01 |
| cg26183948    | <i>PTPRN2</i>    | chr7  | Body    | 1.01 | (0.71; 1.43) | 9.7E-01 |
| cg05605135    | <i>TNRC18</i>    | chr7  | 5'UTR   | 0.99 | (0.73; 1.36) | 9.7E-01 |
| cg19388312    | <i>SRSF10</i>    | chr1  | Body    | 1.01 | (0.58; 1.76) | 9.7E-01 |
| cg04615668    | <i>CTNND2</i>    | chr5  | Body    | 0.99 | (0.71; 1.39) | 9.7E-01 |
| cg08475042    | <i>UNC80</i>     | chr2  | Body    | 0.99 | (0.71; 1.39) | 9.7E-01 |
| cg26359730    | <i>TNR</i>       | chr1  | 5'UTR   | 1.01 | (0.7; 1.45)  | 9.7E-01 |
| cg10432654    | <i>GNA12</i>     | chr7  | Body    | 1.01 | (0.67; 1.5)  | 9.7E-01 |
| cg22049038    | <i>CNTNAP2</i>   | chr7  | Body    | 0.99 | (0.71; 1.39) | 9.7E-01 |
| cg10346416    | <i>TNFRSF10D</i> | chr8  | Body    | 1.01 | (0.74; 1.37) | 9.7E-01 |
| cg21024835    | <i>PTPRN2</i>    | chr7  | Body    | 0.99 | (0.71; 1.38) | 9.7E-01 |
| cg25873335    | <i>DCUN1D4</i>   | chr4  | TSS200  | 1.01 | (0.74; 1.37) | 9.7E-01 |
| cg25873335    | <i>DCUN1D4</i>   | chr4  | TSS1500 | 1.01 | (0.74; 1.37) | 9.7E-01 |
| cg05789099    | <i>TENM2</i>     | chr5  | Body    | 0.99 | (0.74; 1.34) | 9.7E-01 |
| cg01787798    | <i>TNR</i>       | chr1  | 5'UTR   | 1.01 | (0.72; 1.4)  | 9.7E-01 |
| cg20244763    | <i>FBXO33</i>    | chr14 | Body    | 1.01 | (0.73; 1.38) | 9.7E-01 |
| cg24460711    | <i>CACNA1C</i>   | chr12 | Body    | 1.01 | (0.62; 1.64) | 9.7E-01 |
| cg21963042    | <i>TNFRSF10B</i> | chr8  | Body    | 1.01 | (0.73; 1.39) | 9.7E-01 |
| cg21963042    | <i>TNFRSF10B</i> | chr8  | 5'UTR   | 1.01 | (0.73; 1.39) | 9.7E-01 |
| cg21963042    | <i>TNFRSF10B</i> | chr8  | 1stExon | 1.01 | (0.73; 1.39) | 9.7E-01 |
| cg21235025    | <i>DACH1</i>     | chr13 | Body    | 0.99 | (0.56; 1.76) | 9.7E-01 |
| cg00691830    | <i>MEIS2</i>     | chr15 | Body    | 1.01 | (0.74; 1.37) | 9.7E-01 |
| cg10731951    | <i>PTPRN2</i>    | chr7  | Body    | 0.99 | (0.73; 1.36) | 9.7E-01 |
| cg10854767    | <i>PTPRN2</i>    | chr7  | Body    | 0.99 | (0.71; 1.39) | 9.7E-01 |
| cg02348989    | <i>TSHZ3</i>     | chr19 | Body    | 1    | (0.77; 1.28) | 9.7E-01 |
| cg16127691    | <i>ZBTB20</i>    | chr3  | Body    | 1.01 | (0.71; 1.43) | 9.7E-01 |
| cg16127691    | <i>ZBTB20</i>    | chr3  | 5'UTR   | 1.01 | (0.71; 1.43) | 9.7E-01 |
| cg22888214    | <i>CACNA1C</i>   | chr12 | Body    | 0.99 | (0.64; 1.55) | 9.7E-01 |
| cg08235947    | <i>PTPRN2</i>    | chr7  | Body    | 0.99 | (0.72; 1.38) | 9.7E-01 |
| cg25113008    | <i>RAP1B</i>     | chr12 | Body    | 1.01 | (0.71; 1.43) | 9.7E-01 |
| cg24172774    | <i>ACVR2A</i>    | chr2  | Body    | 0.99 | (0.68; 1.45) | 9.7E-01 |
| cg23221723    | <i>TNFRSF10C</i> | chr8  | Body    | 1.01 | (0.47; 2.18) | 9.7E-01 |
| cg03377396    | <i>ZBTB20</i>    | chr3  | Body    | 0.99 | (0.7; 1.41)  | 9.7E-01 |



|            |              |       |         |      |              |         |
|------------|--------------|-------|---------|------|--------------|---------|
| cg24684739 | ZFP91        | chr11 | TSS1500 | 0.99 | (0.69; 1.44) | 9.7E-01 |
| cg02628790 | TAOK3        | chr12 | Body    | 1.01 | (0.68; 1.5)  | 9.7E-01 |
| cg10732601 | CSMD2        | chr1  | Body    | 0.99 | (0.71; 1.39) | 9.7E-01 |
| cg08538032 | ELAVL4       | chr1  | TSS200  | 0.99 | (0.67; 1.47) | 9.7E-01 |
| cg08538032 | ELAVL4       | chr1  | Body    | 0.99 | (0.67; 1.47) | 9.7E-01 |
| cg27270830 | PTPRS        | chr19 | Body    | 1    | (0.73; 1.35) | 9.7E-01 |
| cg03223126 | CUX2         | chr12 | TSS1500 | 1.01 | (0.73; 1.38) | 9.7E-01 |
| cg05300440 | ARID1A       | chr1  | Body    | 1    | (0.74; 1.37) | 9.8E-01 |
| cg04495969 | FBXO11       | chr2  | 5'UTR   | 0.99 | (0.7; 1.42)  | 9.8E-01 |
| cg02240291 | SMARCD3      | chr7  | Body    | 1.01 | (0.69; 1.47) | 9.8E-01 |
| cg25740250 | PTPRN2       | chr7  | Body    | 1    | (0.75; 1.35) | 9.8E-01 |
| cg25788533 | TNFRSF19     | chr13 | Body    | 1    | (0.73; 1.35) | 9.8E-01 |
| cg04496204 | DACH1        | chr13 | Body    | 0.99 | (0.71; 1.4)  | 9.8E-01 |
| cg01389234 | ZBTB20       | chr3  | Body    | 0.99 | (0.66; 1.5)  | 9.8E-01 |
| cg01389234 | ZBTB20       | chr3  | 5'UTR   | 0.99 | (0.66; 1.5)  | 9.8E-01 |
| cg16964025 | PTPRN2       | chr7  | Body    | 0.99 | (0.7; 1.42)  | 9.8E-01 |
| cg12531919 | WVOX         | chr16 | Body    | 1    | (0.74; 1.36) | 9.8E-01 |
| cg13800209 | MEIS2        | chr15 | 5'UTR   | 0.99 | (0.62; 1.6)  | 9.8E-01 |
| cg13800209 | MEIS2        | chr15 | 1stExon | 0.99 | (0.62; 1.6)  | 9.8E-01 |
| cg13800209 | MEIS2        | chr15 | Body    | 0.99 | (0.62; 1.6)  | 9.8E-01 |
| cg21185990 | PTPRN2       | chr7  | Body    | 1    | (0.74; 1.34) | 9.8E-01 |
| cg08903584 | FBXO31       | chr16 | Body    | 1    | (0.72; 1.38) | 9.8E-01 |
| cg02323550 | PTPRN2       | chr7  | Body    | 1    | (0.72; 1.38) | 9.8E-01 |
| cg09230014 | PTPRN2       | chr7  | Body    | 1.01 | (0.72; 1.4)  | 9.8E-01 |
| cg20708280 | CEP350       | chr1  | Body    | 1.01 | (0.67; 1.51) | 9.8E-01 |
| cg20933713 | TNR          | chr1  | TSS1500 | 1    | (0.73; 1.37) | 9.8E-01 |
| cg10588150 | CSMD2        | chr1  | Body    | 1.01 | (0.7; 1.45)  | 9.8E-01 |
| cg03632782 | CDH13        | chr16 | Body    | 0.99 | (0.7; 1.41)  | 9.8E-01 |
| cg25358212 | CTNND2       | chr5  | Body    | 1.01 | (0.7; 1.45)  | 9.8E-01 |
| cg17661112 | PTPRN2       | chr7  | Body    | 1    | (0.73; 1.39) | 9.8E-01 |
| cg24372762 | WVOX         | chr16 | Body    | 1    | (0.73; 1.38) | 9.8E-01 |
| cg08915603 | MTNR1A       | chr4  | TSS200  | 0.99 | (0.59; 1.66) | 9.8E-01 |
| cg00963169 | ELAVL4       | chr1  | Body    | 1.01 | (0.6; 1.68)  | 9.8E-01 |
| cg01190168 | CTDSP2       | chr12 | Body    | 1.01 | (0.69; 1.47) | 9.8E-01 |
| cg06723898 | CSMD2        | chr1  | Body    | 1.01 | (0.6; 1.69)  | 9.8E-01 |
| cg03034070 | COL5A2       | chr2  | TSS1500 | 1    | (0.73; 1.36) | 9.8E-01 |
| cg08544510 | RECQL5       | chr17 | Body    | 0.99 | (0.68; 1.45) | 9.8E-01 |
| cg02795629 | WVOX         | chr16 | Body    | 0.99 | (0.69; 1.43) | 9.8E-01 |
| cg11757124 | PTPRN2       | chr7  | Body    | 1    | (0.74; 1.34) | 9.8E-01 |
| cg27531327 | CDH13        | chr16 | Body    | 0.99 | (0.67; 1.48) | 9.8E-01 |
| cg27531327 | LOC101928417 | chr16 | TSS1500 | 0.99 | (0.67; 1.48) | 9.8E-01 |
| cg27531327 | CDH13        | chr16 | 5'UTR   | 0.99 | (0.67; 1.48) | 9.8E-01 |
| cg10771779 | PTPRN2       | chr7  | Body    | 1    | (0.76; 1.32) | 9.8E-01 |
| cg08081323 | RTN4RL2      | chr11 | Body    | 0.99 | (0.57; 1.72) | 9.8E-01 |
| cg01798168 | POU2F1       | chr1  | ExonBnd | 1.01 | (0.59; 1.73) | 9.8E-01 |
| cg01798168 | POU2F1       | chr1  | Body    | 1.01 | (0.59; 1.73) | 9.8E-01 |
| cg02037858 | RTN4         | chr2  | Body    | 1    | (0.72; 1.38) | 9.8E-01 |
| cg08218437 | PHACTR1      | chr6  | Body    | 1.01 | (0.56; 1.82) | 9.8E-01 |
| cg19983815 | ATP6V0C      | chr16 | TSS200  | 1    | (0.72; 1.4)  | 9.8E-01 |
| cg14561985 | PTPRN2       | chr7  | Body    | 1    | (0.7; 1.42)  | 9.8E-01 |
| cg03127750 | PTPRN2       | chr7  | Body    | 1    | (0.7; 1.44)  | 9.8E-01 |
| cg11445764 | FBXO38       | chr5  | 5'UTR   | 1    | (0.72; 1.37) | 9.8E-01 |
| cg00806490 | CDH13        | chr16 | Body    | 0.99 | (0.64; 1.54) | 9.8E-01 |
| cg09962086 | RTN4         | chr2  | Body    | 1.01 | (0.68; 1.49) | 9.8E-01 |
| cg09962086 | RTN4         | chr2  | 5'UTR   | 1.01 | (0.68; 1.49) | 9.8E-01 |
| cg21506053 | WVOX         | chr16 | Body    | 1    | (0.72; 1.37) | 9.8E-01 |
| cg06779232 | PTPRN2       | chr7  | Body    | 1    | (0.77; 1.31) | 9.8E-01 |
| cg16385724 | TENM2        | chr5  | Body    | 1.01 | (0.64; 1.57) | 9.8E-01 |
| cg16875498 | CACNA1C      | chr12 | Body    | 0.99 | (0.46; 2.13) | 9.8E-01 |
| cg00838934 | MTCL1        | chr18 | ExonBnd | 1    | (0.7; 1.44)  | 9.8E-01 |
| cg00838934 | MTCL1        | chr18 | Body    | 1    | (0.7; 1.44)  | 9.8E-01 |



|            |                  |       |         |      |              |         |
|------------|------------------|-------|---------|------|--------------|---------|
| cg11611549 | <i>ATF7IP2</i>   | chr16 | Body    | 1    | (0.7; 1.44)  | 9.8E-01 |
| cg20123706 | <i>TNRC6B</i>    | chr22 | Body    | 1    | (0.7; 1.41)  | 9.8E-01 |
| cg15279308 | <i>CACNA1C</i>   | chr12 | 3'UTR   | 1    | (0.74; 1.35) | 9.8E-01 |
| cg26189983 | <i>TNFRSF1B</i>  | chr1  | Body    | 1    | (0.73; 1.36) | 9.8E-01 |
| cg05381423 | <i>PTPRS</i>     | chr19 | 1stExon | 1    | (0.7; 1.45)  | 9.8E-01 |
| cg05381423 | <i>PTPRS</i>     | chr19 | 5'UTR   | 1    | (0.7; 1.45)  | 9.8E-01 |
| cg25752163 | <i>CUX2</i>      | chr12 | TSS1500 | 1    | (0.74; 1.36) | 9.8E-01 |
| cg16530730 | <i>CDH13</i>     | chr16 | 5'UTR   | 1    | (0.71; 1.43) | 9.8E-01 |
| cg16530730 | <i>CDH13</i>     | chr16 | Body    | 1    | (0.71; 1.43) | 9.8E-01 |
| cg18756498 | <i>ALCAM</i>     | chr3  | 5'UTR   | 1    | (0.73; 1.39) | 9.8E-01 |
| cg18756498 | <i>ALCAM</i>     | chr3  | 1stExon | 1    | (0.73; 1.39) | 9.8E-01 |
| cg20812318 | <i>SGIP1</i>     | chr1  | Body    | 1    | (0.74; 1.37) | 9.8E-01 |
| cg25445104 | <i>AKAP13</i>    | chr15 | Body    | 1    | (0.76; 1.32) | 9.8E-01 |
| cg25445104 | <i>AKAP13</i>    | chr15 | TSS1500 | 1    | (0.76; 1.32) | 9.8E-01 |
| cg00799631 | <i>TNRC18</i>    | chr7  | Body    | 1    | (0.74; 1.36) | 9.8E-01 |
| cg00321927 | <i>CDH13</i>     | chr16 | 5'UTR   | 1    | (0.72; 1.39) | 9.8E-01 |
| cg00321927 | <i>CDH13</i>     | chr16 | Body    | 1    | (0.72; 1.39) | 9.8E-01 |
| cg05944174 | <i>PTPRN2</i>    | chr7  | Body    | 1    | (0.73; 1.38) | 9.8E-01 |
| cg26790663 | <i>PTPRN2</i>    | chr7  | Body    | 1    | (0.74; 1.36) | 9.8E-01 |
| cg12660963 | <i>CDH11</i>     | chr16 | 5'UTR   | 1    | (0.72; 1.4)  | 9.8E-01 |
| cg27299484 | <i>ATP8A1</i>    | chr4  | Body    | 1    | (0.74; 1.34) | 9.8E-01 |
| cg21579360 | <i>RECQL</i>     | chr12 | ExonBnd | 1    | (0.72; 1.37) | 9.8E-01 |
| cg21579360 | <i>RECQL</i>     | chr12 | Body    | 1    | (0.72; 1.37) | 9.8E-01 |
| cg16241421 | <i>CUX2</i>      | chr12 | Body    | 1    | (0.71; 1.43) | 9.8E-01 |
| cg15809571 | <i>NDUFA9</i>    | chr12 | TSS1500 | 1    | (0.7; 1.41)  | 9.8E-01 |
| cg04135434 | <i>PTPRN2</i>    | chr7  | Body    | 1    | (0.72; 1.39) | 9.8E-01 |
| cg27517185 | <i>CDH13</i>     | chr16 | 5'UTR   | 1    | (0.73; 1.36) | 9.8E-01 |
| cg27517185 | <i>CDH13</i>     | chr16 | Body    | 1    | (0.73; 1.36) | 9.8E-01 |
| cg25348130 | <i>TNFRSF11B</i> | chr8  | Body    | 1    | (0.69; 1.44) | 9.8E-01 |
| cg00638020 | <i>PTPRN2</i>    | chr7  | Body    | 1    | (0.72; 1.4)  | 9.8E-01 |
| cg01536668 | <i>CREBBP</i>    | chr16 | Body    | 1    | (0.7; 1.43)  | 9.8E-01 |
| cg16910042 | <i>PTPRN2</i>    | chr7  | Body    | 1    | (0.71; 1.39) | 9.8E-01 |
| cg11600326 | <i>PTPRN2</i>    | chr7  | Body    | 1.01 | (0.53; 1.91) | 9.8E-01 |
| cg02825561 | <i>TNRC18</i>    | chr7  | Body    | 1    | (0.68; 1.47) | 9.8E-01 |
| cg06243124 | <i>PTPRU</i>     | chr1  | Body    | 1    | (0.71; 1.41) | 9.8E-01 |
| cg10845232 | <i>PHACTR1</i>   | chr6  | Body    | 1    | (0.74; 1.35) | 9.8E-01 |
| cg16474791 | <i>RTN4R</i>     | chr22 | 3'UTR   | 1    | (0.66; 1.54) | 9.8E-01 |
| cg05786812 | <i>CDH13</i>     | chr16 | 5'UTR   | 1    | (0.72; 1.39) | 9.8E-01 |
| cg05786812 | <i>CDH13</i>     | chr16 | Body    | 1    | (0.72; 1.39) | 9.8E-01 |
| cg05697637 | <i>ATP8A1</i>    | chr4  | TSS1500 | 1    | (0.73; 1.36) | 9.8E-01 |
| cg06248560 | <i>BRUNOL4</i>   | chr18 | Body    | 1    | (0.67; 1.48) | 9.9E-01 |
| cg12125241 | <i>PDE8A</i>     | chr15 | Body    | 1    | (0.66; 1.53) | 9.9E-01 |
| cg07951949 | <i>CDH11</i>     | chr16 | Body    | 1    | (0.65; 1.54) | 9.9E-01 |
| cg12179826 | <i>BARX1</i>     | chr9  | Body    | 1    | (0.74; 1.36) | 9.9E-01 |
| cg09328283 | <i>CACNA1C</i>   | chr12 | TSS1500 | 1    | (0.73; 1.36) | 9.9E-01 |
| cg04461013 | <i>TNRC18</i>    | chr7  | Body    | 1    | (0.71; 1.4)  | 9.9E-01 |
| cg01592526 | <i>RECQL5</i>    | chr17 | TSS200  | 1    | (0.71; 1.41) | 9.9E-01 |
| cg03424342 | <i>FSTL1</i>     | chr3  | 5'UTR   | 1    | (0.72; 1.4)  | 9.9E-01 |
| cg03424342 | <i>FSTL1</i>     | chr3  | 1stExon | 1    | (0.72; 1.4)  | 9.9E-01 |
| cg19254830 | <i>ALCAM</i>     | chr3  | Body    | 1    | (0.73; 1.37) | 9.9E-01 |
| cg07924708 | <i>PTPRN2</i>    | chr7  | Body    | 1    | (0.74; 1.35) | 9.9E-01 |
| cg20235871 | <i>PTPRN2</i>    | chr7  | Body    | 1    | (0.73; 1.37) | 9.9E-01 |
| cg17869960 | <i>PHACTR1</i>   | chr6  | 5'UTR   | 1    | (0.71; 1.41) | 9.9E-01 |
| cg17698886 | <i>PTPRS</i>     | chr19 | TSS1500 | 1    | (0.71; 1.42) | 9.9E-01 |
| cg15558448 | <i>NRXN1</i>     | chr2  | Body    | 1    | (0.72; 1.4)  | 9.9E-01 |
| cg09250656 | <i>MTCL1</i>     | chr18 | Body    | 1    | (0.72; 1.4)  | 9.9E-01 |
| cg03885818 | <i>CACNA1C</i>   | chr12 | Body    | 1    | (0.73; 1.37) | 9.9E-01 |
| cg08763063 | <i>CNTNAP2</i>   | chr7  | Body    | 1    | (0.67; 1.48) | 9.9E-01 |
| cg04893733 | <i>TSHZ3</i>     | chr19 | Body    | 1    | (0.74; 1.35) | 9.9E-01 |
| cg11532229 | <i>NOL4</i>      | chr18 | TSS1500 | 1    | (0.65; 1.55) | 9.9E-01 |
| cg11532229 | <i>NOL4</i>      | chr18 | Body    | 1    | (0.65; 1.55) | 9.9E-01 |



|            |                     |       |         |   |              |         |
|------------|---------------------|-------|---------|---|--------------|---------|
| cg24764279 | <i>PTPRN2</i>       | chr7  | Body    | 1 | (0.71; 1.4)  | 9.9E-01 |
| cg07176609 | <i>TNR</i>          | chr1  | 5'UTR   | 1 | (0.71; 1.43) | 9.9E-01 |
| cg14571000 | <i>PTPRN2</i>       | chr7  | Body    | 1 | (0.68; 1.46) | 9.9E-01 |
| cg08960498 | <i>PHACTR1</i>      | chr6  | Body    | 1 | (0.57; 1.73) | 9.9E-01 |
| cg15151052 | <i>PTPRU</i>        | chr1  | Body    | 1 | (0.59; 1.7)  | 9.9E-01 |
| cg02938601 | <i>TNFRSF10C</i>    | chr8  | Body    | 1 | (0.73; 1.37) | 9.9E-01 |
| cg27584713 | <i>PHACTR1</i>      | chr6  | TSS1500 | 1 | (0.64; 1.55) | 9.9E-01 |
| cg19852344 | <i>CHFR</i>         | chr12 | 5'UTR   | 1 | (0.71; 1.39) | 9.9E-01 |
| cg14034092 | <i>CHFR</i>         | chr12 | Body    | 1 | (0.71; 1.39) | 9.9E-01 |
| cg17984612 | <i>FBXO34</i>       | chr14 | 5'UTR   | 1 | (0.72; 1.37) | 9.9E-01 |
| cg09044294 | <i>NRXN1</i>        | chr2  | Body    | 1 | (0.65; 1.55) | 9.9E-01 |
| cg21244990 | <i>PTPRN2</i>       | chr7  | Body    | 1 | (0.73; 1.37) | 9.9E-01 |
| cg18629514 | <i>TNRC18</i>       | chr7  | Body    | 1 | (0.7; 1.42)  | 9.9E-01 |
| cg20283505 | <i>TNR</i>          | chr1  | 5'UTR   | 1 | (0.74; 1.35) | 9.9E-01 |
| cg07458150 | <i>ZBTB20</i>       | chr3  | Body    | 1 | (0.51; 1.94) | 9.9E-01 |
| cg07458150 | <i>ZBTB20</i>       | chr3  | 3'UTR   | 1 | (0.51; 1.94) | 9.9E-01 |
| cg20068747 | <i>FBXO34</i>       | chr14 | 5'UTR   | 1 | (0.63; 1.58) | 9.9E-01 |
| cg10242494 | <i>SCAF8</i>        | chr6  | Body    | 1 | (0.68; 1.46) | 9.9E-01 |
| cg17973164 | <i>BRUNOL4</i>      | chr18 | TSS1500 | 1 | (0.59; 1.7)  | 9.9E-01 |
| cg09545368 | <i>PTPRN2</i>       | chr7  | Body    | 1 | (0.73; 1.37) | 9.9E-01 |
| cg26367456 | <i>ALCAM</i>        | chr3  | Body    | 1 | (0.7; 1.42)  | 9.9E-01 |
| cg07386898 | <i>CPEB1</i>        | chr15 | Body    | 1 | (0.73; 1.37) | 9.9E-01 |
| cg16560495 | <i>ZBTB20</i>       | chr3  | TSS1500 | 1 | (0.72; 1.39) | 9.9E-01 |
| cg16560495 | <i>ZBTB20</i>       | chr3  | 5'UTR   | 1 | (0.72; 1.39) | 9.9E-01 |
| cg16055195 | <i>ATF7</i>         | chr12 | Body    | 1 | (0.73; 1.36) | 9.9E-01 |
| cg15700587 | <i>CNTNAP2</i>      | chr7  | Body    | 1 | (0.69; 1.46) | 9.9E-01 |
| cg14270392 | <i>PTPRN2</i>       | chr7  | Body    | 1 | (0.74; 1.36) | 9.9E-01 |
| cg16980854 | <i>MTCL1</i>        | chr18 | Body    | 1 | (0.72; 1.37) | 9.9E-01 |
| cg14621522 | <i>PDE8A</i>        | chr15 | TSS200  | 1 | (0.72; 1.39) | 9.9E-01 |
| cg14621522 | <i>PDE8A</i>        | chr15 | 5'UTR   | 1 | (0.72; 1.39) | 9.9E-01 |
| cg27194152 | <i>PTPRN2</i>       | chr7  | Body    | 1 | (0.74; 1.36) | 9.9E-01 |
| cg19466046 | <i>TAOK3</i>        | chr12 | 5'UTR   | 1 | (0.63; 1.58) | 9.9E-01 |
| cg15995846 | <i>CSMD2</i>        | chr1  | Body    | 1 | (0.65; 1.54) | 9.9E-01 |
| cg00172597 | <i>SUSD4</i>        | chr1  | TSS1500 | 1 | (0.66; 1.51) | 9.9E-01 |
| cg14870792 | <i>CACNA1C</i>      | chr12 | Body    | 1 | (0.69; 1.46) | 9.9E-01 |
| cg13051302 | <i>MEIS2</i>        | chr15 | Body    | 1 | (0.7; 1.43)  | 9.9E-01 |
| cg13173286 | <i>BARX2</i>        | chr11 | Body    | 1 | (0.71; 1.39) | 9.9E-01 |
| cg13606434 | <i>TNRC18</i>       | chr7  | TSS1500 | 1 | (0.67; 1.48) | 9.9E-01 |
| cg06182923 | <i>CSMD2</i>        | chr1  | Body    | 1 | (0.75; 1.33) | 9.9E-01 |
| cg05702548 | <i>AKAP13</i>       | chr15 | Body    | 1 | (0.48; 2.1)  | 9.9E-01 |
| cg09026706 | <i>CTDSPL2</i>      | chr15 | 5'UTR   | 1 | (0.6; 1.66)  | 9.9E-01 |
| cg24047390 | <i>LOC101928700</i> | chr7  | TSS1500 | 1 | (0.67; 1.48) | 9.9E-01 |
| cg24047390 | <i>CNTNAP2</i>      | chr7  | Body    | 1 | (0.67; 1.48) | 9.9E-01 |
| cg11320208 | <i>TENM2</i>        | chr5  | Body    | 1 | (0.67; 1.49) | 9.9E-01 |
| cg16137742 | <i>ELAVL4</i>       | chr1  | Body    | 1 | (0.73; 1.36) | 9.9E-01 |
| cg13086402 | <i>UNC80</i>        | chr2  | Body    | 1 | (0.72; 1.4)  | 9.9E-01 |
| cg09784932 | <i>RTN4R</i>        | chr22 | Body    | 1 | (0.7; 1.44)  | 9.9E-01 |
| cg22783088 | <i>FBXO38</i>       | chr5  | Body    | 1 | (0.73; 1.38) | 9.9E-01 |
| cg12541879 | <i>PTPRN2</i>       | chr7  | Body    | 1 | (0.72; 1.38) | 9.9E-01 |
| cg13808141 | <i>TENM2</i>        | chr5  | Body    | 1 | (0.71; 1.42) | 9.9E-01 |
| cg24571553 | <i>COL5A2</i>       | chr2  | Body    | 1 | (0.65; 1.52) | 9.9E-01 |
| cg20765665 | <i>DACH1</i>        | chr13 | Body    | 1 | (0.69; 1.46) | 9.9E-01 |
| cg11163497 | <i>FBXO36</i>       | chr2  | TSS1500 | 1 | (0.69; 1.44) | 9.9E-01 |
| cg25566285 | <i>PTPRN2</i>       | chr7  | Body    | 1 | (0.74; 1.35) | 9.9E-01 |
| cg00924624 | <i>CHCHD6</i>       | chr3  | Body    | 1 | (0.58; 1.71) | 9.9E-01 |
| cg17021875 | <i>MTNR1A</i>       | chr4  | Body    | 1 | (0.72; 1.4)  | 9.9E-01 |
| cg12129715 | <i>CACNA1C</i>      | chr12 | Body    | 1 | (0.53; 1.9)  | 9.9E-01 |
| cg08452870 | <i>PTPRN2</i>       | chr7  | Body    | 1 | (0.72; 1.38) | 9.9E-01 |
| cg02219447 | <i>AKAP13</i>       | chr15 | Body    | 1 | (0.74; 1.35) | 9.9E-01 |
| cg16142531 | <i>MBD5</i>         | chr2  | 5'UTR   | 1 | (0.7; 1.42)  | 9.9E-01 |
| cg19904666 | <i>CTNND2</i>       | chr5  | Body    | 1 | (0.47; 2.13) | 9.9E-01 |



|               |                  |       |         |   |              |         |
|---------------|------------------|-------|---------|---|--------------|---------|
| cg09383172    | <i>PTPRN2</i>    | chr7  | Body    | 1 | (0.7; 1.42)  | 9.9E-01 |
| cg27247590    | <i>CDH13</i>     | chr16 | Body    | 1 | (0.7; 1.42)  | 9.9E-01 |
| cg18951543    | <i>PTPRN2</i>    | chr7  | Body    | 1 | (0.76; 1.32) | 9.9E-01 |
| cg17070234    | <i>NRXN1</i>     | chr2  | Body    | 1 | (0.71; 1.41) | 9.9E-01 |
| cg06099703    | <i>ATP6V0C</i>   | chr16 | 3'UTR   | 1 | (0.73; 1.37) | 9.9E-01 |
| cg15740346    | <i>CACNA1C</i>   | chr12 | Body    | 1 | (0.72; 1.39) | 9.9E-01 |
| cg05342250    | <i>CTDSP2</i>    | chr12 | TSS200  | 1 | (0.74; 1.35) | 9.9E-01 |
| cg25890575    | <i>PTPRN2</i>    | chr7  | Body    | 1 | (0.75; 1.33) | 1.0E+00 |
| cg27576259    | <i>ATP6V0C</i>   | chr16 | Body    | 1 | (0.59; 1.71) | 1.0E+00 |
| cg05429123    | <i>ZNF704</i>    | chr8  | Body    | 1 | (0.74; 1.36) | 1.0E+00 |
| cg17286491    | <i>CEP350</i>    | chr1  | TSS1500 | 1 | (0.74; 1.35) | 1.0E+00 |
| cg06248741    | <i>TXNDC9</i>    | chr2  | TSS1500 | 1 | (0.71; 1.4)  | 1.0E+00 |
| cg25382821    | <i>UBE2E2</i>    | chr3  | Body    | 1 | (0.7; 1.43)  | 1.0E+00 |
| cg08336832    | <i>FBXO34</i>    | chr14 | TSS1500 | 1 | (0.7; 1.43)  | 1.0E+00 |
| cg08336832    | <i>FBXO34</i>    | chr14 | TSS200  | 1 | (0.7; 1.43)  | 1.0E+00 |
| ch.16.192535R | <i>CREBBP</i>    | chr16 | Body    | 1 | (0.72; 1.39) | 1.0E+00 |
| cg07506599    | <i>PTPRN2</i>    | chr7  | Body    | 1 | (0.69; 1.46) | 1.0E+00 |
| cg22897511    | <i>WAC</i>       | chr10 | Body    | 1 | (0.69; 1.44) | 1.0E+00 |
| cg16228716    | <i>RNU5E-1</i>   | chr5  | Body    | 1 | (0.67; 1.48) | 1.0E+00 |
| cg15993873    | <i>CTDSPL2</i>   | chr15 | 1stExon | 1 | (0.71; 1.41) | 1.0E+00 |
| cg15993873    | <i>CTDSPL2</i>   | chr15 | 5'UTR   | 1 | (0.71; 1.41) | 1.0E+00 |
| cg07801742    | <i>CHCHD6</i>    | chr3  | Body    | 1 | (0.73; 1.38) | 1.0E+00 |
| cg10855967    | <i>WVOX</i>      | chr16 | 1stExon | 1 | (0.68; 1.47) | 1.0E+00 |
| cg23181590    | <i>ZNF704</i>    | chr8  | TSS1500 | 1 | (0.74; 1.35) | 1.0E+00 |
| cg00587329    | <i>BARX2</i>     | chr11 | Body    | 1 | (0.69; 1.45) | 1.0E+00 |
| cg11589567    | <i>TNR</i>       | chr1  | 5'UTR   | 1 | (0.63; 1.58) | 1.0E+00 |
| cg17475323    | <i>TNFRSF11A</i> | chr18 | Body    | 1 | (0.73; 1.36) | 1.0E+00 |
| cg13556468    | <i>CDH13</i>     | chr16 | 5'UTR   | 1 | (0.72; 1.39) | 1.0E+00 |
| cg13556468    | <i>CDH13</i>     | chr16 | Body    | 1 | (0.72; 1.39) | 1.0E+00 |
| cg14706245    | <i>PTPRN2</i>    | chr7  | Body    | 1 | (0.75; 1.34) | 1.0E+00 |
| cg05012126    | <i>PTPRN2</i>    | chr7  | Body    | 1 | (0.44; 2.24) | 1.0E+00 |
| cg01599159    | <i>WVOX</i>      | chr16 | Body    | 1 | (0.72; 1.38) | 1.0E+00 |
| cg01706361    | <i>TNRC6B</i>    | chr22 | Body    | 1 | (0.71; 1.41) | 1.0E+00 |
| cg08073142    | <i>TNRC6A</i>    | chr16 | TSS1500 | 1 | (0.72; 1.38) | 1.0E+00 |
| cg04641731    | <i>ZNF704</i>    | chr8  | TSS1500 | 1 | (0.69; 1.45) | 1.0E+00 |
| cg19689679    | <i>PTPRN2</i>    | chr7  | Body    | 1 | (0.7; 1.42)  | 1.0E+00 |
| cg18147280    | <i>PEX14</i>     | chr1  | Body    | 1 | (0.69; 1.44) | 1.0E+00 |
| cg03509193    | <i>BARX2</i>     | chr11 | Body    | 1 | (0.72; 1.39) | 1.0E+00 |
| cg06315745    | <i>CTNND2</i>    | chr5  | Body    | 1 | (0.63; 1.58) | 1.0E+00 |
| cg06536951    | <i>MTCL1</i>     | chr18 | Body    | 1 | (0.73; 1.37) | 1.0E+00 |
| cg08627619    | <i>POU2F1</i>    | chr1  | Body    | 1 | (0.67; 1.49) | 1.0E+00 |
| cg27526761    | <i>MEIS2</i>     | chr15 | Body    | 1 | (0.73; 1.38) | 1.0E+00 |
| cg10481617    | <i>PHACTR1</i>   | chr6  | Body    | 1 | (0.66; 1.51) | 1.0E+00 |
| cg07246187    | <i>CTDSP2</i>    | chr12 | 3'UTR   | 1 | (0.73; 1.37) | 1.0E+00 |
| cg11967407    | <i>SRSF10</i>    | chr1  | Body    | 1 | (0.66; 1.51) | 1.0E+00 |
| cg06578117    | <i>SLC16A9</i>   | chr10 | 5'UTR   | 1 | (0.68; 1.48) | 1.0E+00 |
| cg18242990    | <i>GNA12</i>     | chr7  | TSS200  | 1 | (0.72; 1.38) | 1.0E+00 |
| cg05191928    | <i>GNA12</i>     | chr7  | TSS200  | 1 | (0.71; 1.41) | 1.0E+00 |
| cg03288942    | <i>TENM2</i>     | chr5  | Body    | 1 | (0.72; 1.38) | 1.0E+00 |
| cg08402498    | <i>CREBBP</i>    | chr16 | Body    | 1 | (0.69; 1.45) | 1.0E+00 |



**Supplementary Table S9:** Genes ordered by predictive capacity of the respectively annotated CpG sites

| Gene symbol     | Total n CpG sites in EPIC array | CpG selected in LASSO | ROC-AUC (95%-CI)  |
|-----------------|---------------------------------|-----------------------|-------------------|
| <i>AKAP13</i>   | 191                             | 16                    | 0.73 (0.69, 0.77) |
| <i>TENM2</i>    | 139                             | 6                     | 0.7 (0.66, 0.74)  |
| <i>CTDSPL</i>   | 59                              | 11                    | 0.68 (0.64, 0.73) |
| <i>PTPRN2</i>   | 1485                            | 6                     | 0.68 (0.64, 0.72) |
| <i>PTPRS</i>    | 123                             | 7                     | 0.67 (0.62, 0.71) |
| <i>ARID1A</i>   | 55                              | 6                     | 0.66 (0.61, 0.7)  |
| <i>CUX2</i>     | 176                             | 6                     | 0.66 (0.61, 0.7)  |
| <i>TNRC6C</i>   | 53                              | 7                     | 0.65 (0.61, 0.7)  |
| <i>TNRC6B</i>   | 85                              | 3                     | 0.64 (0.59, 0.69) |
| <i>PEX14</i>    | 80                              | 4                     | 0.64 (0.59, 0.68) |
| <i>CTNND2</i>   | 153                             | 4                     | 0.64 (0.59, 0.68) |
| <i>DACH1</i>    | 53                              | 4                     | 0.64 (0.59, 0.68) |
| <i>ATF7IP</i>   | 45                              | 4                     | 0.63 (0.58, 0.68) |
| <i>TXNDC9</i>   | 23                              | 3                     | 0.63 (0.58, 0.68) |
| <i>TNRC18</i>   | 157                             | 3                     | 0.63 (0.58, 0.67) |
| <i>PDE8A</i>    | 84                              | 2                     | 0.62 (0.58, 0.67) |
| <i>WWOX</i>     | 234                             | 4                     | 0.62 (0.58, 0.67) |
| <i>CACNA1C</i>  | 295                             | 3                     | 0.62 (0.58, 0.67) |
| <i>CNTNAP2</i>  | 152                             | 2                     | 0.62 (0.57, 0.67) |
| <i>CHD6</i>     | 59                              | 4                     | 0.62 (0.57, 0.67) |
| <i>TNRC6A</i>   | 57                              | 3                     | 0.62 (0.57, 0.66) |
| <i>TAOK3</i>    | 88                              | 3                     | 0.62 (0.57, 0.66) |
| <i>MEIS2</i>    | 182                             | 2                     | 0.62 (0.57, 0.66) |
| <i>FBXO31</i>   | 128                             | 2                     | 0.61 (0.56, 0.66) |
| <i>ZBTB20</i>   | 289                             | 4                     | 0.61 (0.57, 0.66) |
| <i>CPEB1</i>    | 108                             | 2                     | 0.61 (0.57, 0.66) |
| <i>TNFRSF1B</i> | 49                              | 4                     | 0.61 (0.57, 0.66) |
| <i>RTN4</i>     | 78                              | 2                     | 0.61 (0.57, 0.66) |
| <i>SGIP1</i>    | 74                              | 2                     | 0.61 (0.57, 0.66) |
| <i>SUSD4</i>    | 42                              | 2                     | 0.61 (0.56, 0.66) |
| <i>RTN4R</i>    | 36                              | 4                     | 0.61 (0.56, 0.65) |
| <i>BARX2</i>    | 39                              | 3                     | 0.61 (0.56, 0.65) |
| <i>FBXO11</i>   | 52                              | 2                     | 0.61 (0.56, 0.65) |
| <i>AKAP3</i>    | 20                              | 5                     | 0.6 (0.56, 0.65)  |
| <i>CREBBP</i>   | 98                              | 1                     | 0.6 (0.55, 0.65)  |
| <i>MBD5</i>     | 34                              | 5                     | 0.6 (0.56, 0.65)  |
| <i>CCDC80</i>   | 36                              | 3                     | 0.6 (0.55, 0.65)  |
| <i>BARX1</i>    | 19                              | 2                     | 0.6 (0.55, 0.65)  |
| <i>PTPRU</i>    | 80                              | 1                     | 0.6 (0.55, 0.65)  |
| <i>ERI3</i>     | 90                              | 2                     | 0.6 (0.55, 0.65)  |
| <i>CSMD2</i>    | 168                             | 1                     | 0.6 (0.55, 0.65)  |
| <i>RECQL5</i>   | 76                              | 4                     | 0.6 (0.55, 0.65)  |
| <i>BRUNOL4</i>  | 98                              | 2                     | 0.6 (0.55, 0.65)  |
| <i>NRXN1</i>    | 168                             | 3                     | 0.6 (0.55, 0.64)  |
| <i>ATF7</i>     | 80                              | 3                     | 0.6 (0.55, 0.64)  |
| <i>CTDSPL2</i>  | 36                              | 1                     | 0.6 (0.55, 0.64)  |



|                     |     |   |                   |
|---------------------|-----|---|-------------------|
| <i>GNA12</i>        | 146 | 2 | 0.6 (0.55, 0.64)  |
| <i>POU2F1</i>       | 76  | 3 | 0.59 (0.55, 0.64) |
| <i>SCAF8</i>        | 26  | 3 | 0.59 (0.54, 0.64) |
| <i>TNFRSF12A</i>    | 15  | 2 | 0.59 (0.55, 0.64) |
| <i>CDH11</i>        | 48  | 3 | 0.59 (0.54, 0.64) |
| <i>TNFRSF1A</i>     | 36  | 2 | 0.59 (0.54, 0.64) |
| <i>MEX3A</i>        | 30  | 1 | 0.59 (0.54, 0.64) |
| <i>SMARCD3</i>      | 69  | 2 | 0.59 (0.54, 0.64) |
| <i>RECQL</i>        | 27  | 1 | 0.59 (0.54, 0.64) |
| <i>GOLT1B</i>       | 22  | 1 | 0.59 (0.54, 0.64) |
| <i>ATP6V0C</i>      | 47  | 2 | 0.59 (0.54, 0.64) |
| <i>DDHD2</i>        | 54  | 1 | 0.59 (0.54, 0.64) |
| <i>DMXL2</i>        | 45  | 3 | 0.59 (0.54, 0.64) |
| <i>DCUN1D4</i>      | 48  | 2 | 0.59 (0.54, 0.64) |
| <i>CDH13</i>        | 291 | 3 | 0.59 (0.54, 0.64) |
| <i>NOL4L</i>        | 73  | 1 | 0.59 (0.54, 0.63) |
| <i>LOC101929698</i> | 9   | 1 | 0.59 (0.54, 0.63) |
| <i>TNR</i>          | 82  | 1 | 0.59 (0.54, 0.63) |
| <i>NOL4</i>         | 88  | 1 | 0.59 (0.54, 0.63) |
| <i>UBE2E2</i>       | 72  | 2 | 0.59 (0.54, 0.63) |
| <i>ATP8A1</i>       | 53  | 2 | 0.58 (0.54, 0.63) |
| <i>FBXO33</i>       | 24  | 2 | 0.58 (0.54, 0.63) |
| <i>COL1A2</i>       | 30  | 3 | 0.58 (0.54, 0.63) |
| <i>TNFRSF10B</i>    | 40  | 1 | 0.58 (0.53, 0.63) |
| <i>WAC</i>          | 73  | 1 | 0.58 (0.53, 0.63) |
| <i>NDUFA9</i>       | 30  | 3 | 0.58 (0.54, 0.63) |
| <i>CTDSP2</i>       | 54  | 2 | 0.58 (0.53, 0.63) |
| <i>RTN4RL1</i>      | 97  | 1 | 0.58 (0.53, 0.63) |
| <i>TNFRSF11B</i>    | 24  | 1 | 0.58 (0.53, 0.63) |
| <i>PHACTR1</i>      | 144 | 1 | 0.58 (0.53, 0.63) |
| <i>MTCL1</i>        | 51  | 2 | 0.58 (0.53, 0.63) |
| <i>ELAVL4</i>       | 100 | 1 | 0.58 (0.53, 0.63) |
| <i>SRSF10</i>       | 26  | 1 | 0.58 (0.53, 0.62) |
| <i>FBXO34</i>       | 71  | 1 | 0.58 (0.53, 0.62) |
| <i>SUGCT</i>        | 64  | 1 | 0.58 (0.53, 0.62) |
| <i>TDRP</i>         | 23  | 1 | 0.58 (0.53, 0.62) |
| <i>TNFRSF10D</i>    | 27  | 2 | 0.58 (0.53, 0.62) |
| <i>CHFR</i>         | 96  | 1 | 0.58 (0.53, 0.63) |
| <i>FBXO36</i>       | 43  | 2 | 0.57 (0.53, 0.62) |
| <i>FSTL1</i>        | 37  | 1 | 0.57 (0.53, 0.62) |
| <i>C11orf67</i>     | 14  | 1 | 0.57 (0.52, 0.62) |
| <i>CHCHD6</i>       | 86  | 1 | 0.57 (0.52, 0.62) |
| <i>SLC16A9</i>      | 28  | 3 | 0.57 (0.52, 0.62) |
| <i>FBXO38</i>       | 40  | 1 | 0.57 (0.52, 0.62) |
| <i>TNFRSF19</i>     | 73  | 2 | 0.57 (0.52, 0.62) |
| <i>ACVR2A</i>       | 47  | 2 | 0.57 (0.52, 0.62) |
| <i>HMGB4</i>        | 21  | 1 | 0.57 (0.52, 0.61) |
| <i>CEP350</i>       | 35  | 2 | 0.57 (0.52, 0.61) |
| <i>RAP1B</i>        | 32  | 2 | 0.56 (0.52, 0.61) |
| <i>UNC80</i>        | 47  | 2 | 0.56 (0.52, 0.61) |
| <i>TSHZ3</i>        | 32  | 1 | 0.56 (0.51, 0.61) |
| <i>DNAI2</i>        | 39  | 2 | 0.56 (0.51, 0.61) |
| <i>MTNR1A</i>       | 29  | 1 | 0.56 (0.51, 0.61) |



|                     |    |   |                   |
|---------------------|----|---|-------------------|
| <i>LOC100130933</i> | 13 | 1 | 0.56 (0.51, 0.61) |
| <i>ORC4</i>         | 16 | 1 | 0.56 (0.51, 0.61) |
| <i>ZFP91</i>        | 27 | 2 | 0.56 (0.51, 0.61) |
| <i>ALCAM</i>        | 73 | 1 | 0.56 (0.51, 0.61) |
| <i>RTN4RL2</i>      | 20 | 2 | 0.56 (0.51, 0.61) |
| <i>COL5A2</i>       | 41 | 1 | 0.56 (0.51, 0.61) |
| <i>TNFRSF11A</i>    | 40 | 1 | 0.56 (0.51, 0.6)  |
| <i>RNU5E-1</i>      | 42 | 2 | 0.56 (0.51, 0.6)  |
| <i>ZNF704</i>       | 54 | 3 | 0.56 (0.51, 0.6)  |
| <i>MTNR1B</i>       | 19 | 1 | 0.56 (0.51, 0.61) |
| <i>FBXO32</i>       | 54 | 3 | 0.55 (0.5, 0.6)   |
| <i>CTB-178M22.2</i> | 4  | 1 | 0.55 (0.5, 0.6)   |
| <i>CNTF</i>         | 9  | 2 | 0.55 (0.5, 0.6)   |
| <i>ATF7IP2</i>      | 20 | 2 | 0.55 (0.5, 0.6)   |
| <i>EIF2S1</i>       | 34 | 1 | 0.55 (0.5, 0.6)   |
| <i>LOC101928417</i> | 7  | 1 | 0.55 (0.5, 0.59)  |
| <i>CACNA1C-IT2</i>  | 8  | 1 | 0.54 (0.49, 0.59) |
| <i>CACNA1C-AS4</i>  | 4  | 1 | 0.54 (0.49, 0.59) |
| <i>SRSF12</i>       | 4  | 1 | 0.53 (0.48, 0.58) |
| <i>TNFRSF10C</i>    | 24 | 1 | 0.53 (0.48, 0.58) |
| <i>LOC101928700</i> | 3  | 1 | 0.5 (0.45, 0.55)  |



**Supplementary Table S10:** The overlap of 120 genes identified in the current study with eQTL and T2D-GWAS data

| Num | islet eQTL      | GWAS T2D         |
|-----|-----------------|------------------|
| 1   | <i>AKAP3</i>    |                  |
| 2   | <i>ATP8A1</i>   |                  |
| 3   | <i>CDH13</i>    |                  |
| 4   |                 | <i>PTPRS</i>     |
| 5   |                 | <i>CUX2</i>      |
| 6   | <i>DMXL2</i>    |                  |
| 7   | <i>CHD6</i>     |                  |
| 8   | <i>COL5A2</i>   |                  |
| 9   | <i>WAC</i>      |                  |
| 10  | <i>CHFR</i>     |                  |
| 11  |                 | <i>ERI3</i>      |
| 12  | <i>WWOX</i>     |                  |
| 13  |                 | <i>TNFRSF11B</i> |
| 14  | <i>ZBTB20</i>   | <i>ZBTB20</i>    |
| 15  |                 | <i>RTN4RL1</i>   |
| 16  | <i>RTN4</i>     |                  |
| 17  | <i>DCUN1D4</i>  |                  |
| 18  | <i>TNFRSF1A</i> |                  |
| 19  |                 | <i>CHCHD6</i>    |
| 20  | <i>MTNR1B</i>   |                  |
| 21  | <i>NRXN1</i>    |                  |
| 22  | <i>UBE2E2</i>   |                  |
| 23  |                 | <i>MTNR1B</i>    |
| 24  |                 | <i>NRXN1</i>     |
| 25  |                 | <i>UBE2E2</i>    |
| 26  |                 | <i>POU2F1</i>    |
| 27  |                 | <i>TNRC6A</i>    |
| 28  |                 | <i>PTPRN2</i>    |



[illegible]



|            |          |          |       |        |       |        |       |       |       |       |    |    |             |                      |                |
|------------|----------|----------|-------|--------|-------|--------|-------|-------|-------|-------|----|----|-------------|----------------------|----------------|
| cg00000000 | 2.76E-01 | 1.28E-01 | 0.872 | 70.177 | 0.753 | 65.317 | 0.006 | 2.576 | 0.041 | 4.118 | 37 | 7  | 158.178.627 | PTFRNF.PTFRNF.PTFRNF | Body/Body/Body |
| cg0474864  | 2.74E-01 | 1.27E-01 | 0.814 | 60.181 | 0.656 | 65.637 | 0.001 | 6.130 | 0.098 | 6.095 | 37 | 7  | 157.612.081 | PTFRNF.PTFRNF.PTFRNF | Body/Body/Body |
| cg17016210 | 2.76E-01 | 1.28E-01 | 0.812 | 70.177 | 0.753 | 65.317 | 0.006 | 2.576 | 0.041 | 4.118 | 37 | 7  | 157.612.081 | PTFRNF.PTFRNF.PTFRNF | Body/Body/Body |
| cg2003718  | 2.78E-01 | 1.28E-01 | 0.793 | 79.336 | 0.754 | 79.446 | 0.008 | 3.288 | 0.038 | 3.789 | 37 | 17 | 73.63.083   | LOC10130933.RECOLS   | 3'UTR/Body     |
| cg2003718  | 2.78E-01 | 1.28E-01 | 0.420 | 42.007 | 0.485 | 48.449 | 0.072 | 7.107 | 0.073 | 7.313 | 37 | 17 | 157.612.081 | PTFRNF.PTFRNF.PTFRNF | Body/Body/Body |
| cg0391854  | 2.78E-01 | 1.28E-01 | 0.810 | 60.181 | 0.656 | 65.637 | 0.001 | 6.130 | 0.098 | 6.095 | 37 | 7  | 157.612.081 | PTFRNF.PTFRNF.PTFRNF | Body/Body/Body |
| cg0895425  | 2.84E-01 | 1.29E-01 | 0.832 | 83.187 | 0.847 | 84.803 | 0.023 | 2.226 | 0.020 | 2.007 | 37 | 7  | 157.605.884 | PTFRNF.PTFRNF.PTFRNF | Body/Body/Body |
| cg40702744 | 2.84E-01 | 1.29E-01 | 0.810 | 60.181 | 0.656 | 65.637 | 0.001 | 6.130 | 0.098 | 6.095 | 37 | 7  | 157.612.081 | PTFRNF.PTFRNF.PTFRNF | Body/Body/Body |
| cg0810647  | 2.94E-01 | 1.31E-01 | 0.814 | 60.181 | 0.656 | 65.637 | 0.001 | 6.130 | 0.098 | 6.095 | 37 | 7  | 157.612.081 | PTFRNF.PTFRNF.PTFRNF | Body/Body/Body |
| cg0810647  | 2.94E-01 | 1.31E-01 | 0.814 | 60.181 | 0.656 | 65.637 | 0.001 | 6.130 | 0.098 | 6.095 | 37 | 7  | 157.612.081 | PTFRNF.PTFRNF.PTFRNF | Body/Body/Body |
| cg0810647  | 2.94E-01 | 1.31E-01 | 0.814 | 60.181 | 0.656 | 65.637 | 0.001 | 6.130 | 0.098 | 6.095 | 37 | 7  | 157.612.081 | PTFRNF.PTFRNF.PTFRNF | Body/Body/Body |
| cg0810647  | 2.94E-01 | 1.31E-01 | 0.814 | 60.181 | 0.656 | 65.637 | 0.001 | 6.130 | 0.098 | 6.095 | 37 | 7  | 157.612.081 | PTFRNF.PTFRNF.PTFRNF | Body/Body/Body |
| cg0810647  | 2.94E-01 | 1.31E-01 | 0.814 | 60.181 | 0.656 | 65.637 | 0.001 | 6.130 | 0.098 | 6.095 | 37 | 7  | 157.612.081 | PTFRNF.PTFRNF.PTFRNF | Body/Body/Body |
| cg0810647  | 2.94E-01 | 1.31E-01 | 0.814 | 60.181 | 0.656 | 65.637 | 0.001 | 6.130 | 0.098 | 6.095 | 37 | 7  | 157.612.081 | PTFRNF.PTFRNF.PTFRNF | Body/Body/Body |
| cg0810647  | 2.94E-01 | 1.31E-01 | 0.814 | 60.181 | 0.656 | 65.637 | 0.001 | 6.130 | 0.098 | 6.095 | 37 | 7  | 157.612.081 | PTFRNF.PTFRNF.PTFRNF | Body/Body/Body |
| cg0810647  | 2.94E-01 | 1.31E-01 | 0.814 | 60.181 | 0.656 | 65.637 | 0.001 | 6.130 | 0.098 | 6.095 | 37 | 7  | 157.612.081 | PTFRNF.PTFRNF.PTFRNF | Body/Body/Body |
| cg0810647  | 2.94E-01 | 1.31E-01 | 0.814 | 60.181 | 0.656 | 65.637 | 0.001 | 6.130 | 0.098 | 6.095 | 37 | 7  | 157.612.081 | PTFRNF.PTFRNF.PTFRNF | Body/Body/Body |
| cg0810647  | 2.94E-01 | 1.31E-01 | 0.814 | 60.181 | 0.656 | 65.637 | 0.001 | 6.130 | 0.098 | 6.095 | 37 | 7  | 157.612.081 | PTFRNF.PTFRNF.PTFRNF | Body/Body/Body |
| cg0810647  | 2.94E-01 | 1.31E-01 | 0.814 | 60.181 | 0.656 | 65.637 | 0.001 | 6.130 | 0.098 | 6.095 | 37 | 7  | 157.612.081 | PTFRNF.PTFRNF.PTFRNF | Body/Body/Body |
| cg0810647  | 2.94E-01 | 1.31E-01 | 0.814 | 60.181 | 0.656 | 65.637 | 0.001 | 6.130 | 0.098 | 6.095 | 37 | 7  | 157.612.081 | PTFRNF.PTFRNF.PTFRNF | Body/Body/Body |
| cg0810647  | 2.94E-01 | 1.31E-01 | 0.814 | 60.181 | 0.656 | 65.637 | 0.001 | 6.130 | 0.098 | 6.095 | 37 | 7  | 157.612.081 | PTFRNF.PTFRNF.PTFRNF | Body/Body/Body |
| cg0810647  | 2.94E-01 | 1.31E-01 | 0.814 | 60.181 | 0.656 | 65.637 | 0.001 | 6.130 | 0.098 | 6.095 | 37 | 7  | 157.612.081 | PTFRNF.PTFRNF.PTFRNF | Body/Body/Body |
| cg0810647  | 2.94E-01 | 1.31E-01 | 0.814 | 60.181 | 0.656 | 65.637 | 0.001 | 6.130 | 0.098 | 6.095 | 37 | 7  | 157.612.081 | PTFRNF.PTFRNF.PTFRNF | Body/Body/Body |
| cg0810647  | 2.94E-01 | 1.31E-01 | 0.814 | 60.181 | 0.656 | 65.637 | 0.001 | 6.130 | 0.098 | 6.095 | 37 | 7  | 157.612.081 | PTFRNF.PTFRNF.PTFRNF | Body/Body/Body |
| cg0810647  | 2.94E-01 | 1.31E-01 | 0.814 | 60.181 | 0.656 | 65.637 | 0.001 | 6.130 | 0.098 | 6.095 | 37 | 7  | 157.612.081 | PTFRNF.PTFRNF.PTFRNF | Body/Body/Body |
| cg0810647  | 2.94E-01 | 1.31E-01 | 0.814 | 60.181 | 0.656 | 65.637 | 0.001 | 6.130 | 0.098 | 6.095 | 37 | 7  | 157.612.081 | PTFRNF.PTFRNF.PTFRNF | Body/Body/Body |
| cg0810647  | 2.94E-01 | 1.31E-01 | 0.814 | 60.181 | 0.656 | 65.637 | 0.001 | 6.130 | 0.098 | 6.095 | 37 | 7  | 157.612.081 | PTFRNF.PTFRNF.PTFRNF | Body/Body/Body |
| cg0810647  | 2.94E-01 | 1.31E-01 | 0.814 | 60.181 | 0.656 | 65.637 | 0.001 | 6.130 | 0.098 | 6.095 | 37 | 7  | 157.612.081 | PTFRNF.PTFRNF.PTFRNF | Body/Body/Body |
| cg0810647  | 2.94E-01 | 1.31E-01 | 0.814 | 60.181 | 0.656 | 65.637 | 0.001 | 6.130 | 0.098 | 6.095 | 37 | 7  | 157.612.081 | PTFRNF.PTFRNF.PTFRNF | Body/Body/Body |
| cg0810647  | 2.94E-01 | 1.31E-01 | 0.814 | 60.181 | 0.656 | 65.637 | 0.001 | 6.130 | 0.098 | 6.095 | 37 | 7  | 157.612.081 | PTFRNF.PTFRNF.PTFRNF | Body/Body/Body |
| cg0810647  | 2.94E-01 | 1.31E-01 | 0.814 | 60.181 | 0.656 | 65.637 | 0.001 | 6.130 | 0.098 | 6.095 | 37 | 7  | 157.612.081 | PTFRNF.PTFRNF.PTFRNF | Body/Body/Body |
| cg0810647  | 2.94E-01 | 1.31E-01 | 0.814 | 60.181 | 0.656 | 65.637 | 0.001 | 6.130 | 0.098 | 6.095 | 37 | 7  | 157.612.081 | PTFRNF.PTFRNF.PTFRNF | Body/Body/Body |
| cg0810647  | 2.94E-01 | 1.31E-01 | 0.814 | 60.181 | 0.656 | 65.637 | 0.001 | 6.130 | 0.098 | 6.095 | 37 | 7  | 157.612.081 | PTFRNF.PTFRNF.PTFRNF | Body/Body/Body |
| cg0810647  | 2.94E-01 | 1.31E-01 | 0.814 | 60.181 | 0.656 | 65.637 | 0.001 | 6.130 | 0.098 | 6.095 | 37 | 7  | 157.612.081 | PTFRNF.PTFRNF.PTFRNF | Body/Body/Body |
| cg0810647  | 2.94E-01 | 1.31E-01 | 0.814 | 60.181 | 0.656 | 65.637 | 0.001 | 6.130 | 0.098 | 6.095 | 37 | 7  | 157.612.081 | PTFRNF.PTFRNF.PTFRNF | Body/Body/Body |
| cg0810647  | 2.94E-01 | 1.31E-01 | 0.814 | 60.181 | 0.656 | 65.637 | 0.001 | 6.130 | 0.098 | 6.095 | 37 | 7  | 157.612.081 | PTFRNF.PTFRNF.PTFRNF | Body/Body/Body |
| cg0810647  | 2.94E-01 | 1.31E-01 | 0.814 | 60.181 | 0.656 | 65.637 | 0.001 | 6.130 | 0.098 | 6.095 | 37 | 7  | 157.612.081 | PTFRNF.PTFRNF.PTFRNF | Body/Body/Body |
| cg0810647  | 2.94E-01 | 1.31E-01 | 0.814 | 60.181 | 0.656 | 65.637 | 0.001 | 6.130 | 0.098 | 6.095 | 37 | 7  | 157.612.081 | PTFRNF.PTFRNF.PTFRNF | Body/Body/Body |
| cg0810647  | 2.94E-01 | 1.31E-01 | 0.814 | 60.181 | 0.656 | 65.637 | 0.001 | 6.130 | 0.098 | 6.095 | 37 | 7  | 157.612.081 | PTFRNF.PTFRNF.PTFRNF | Body/Body/Body |
| cg0810647  | 2.94E-01 | 1.31E-01 | 0.814 | 60.181 | 0.656 | 65.637 | 0.001 | 6.130 | 0.098 | 6.095 | 37 | 7  | 157.612.081 | PTFRNF.PTFRNF.PTFRNF | Body/Body/Body |
| cg0810647  | 2.94E-01 | 1.31E-01 | 0.814 | 60.181 | 0.656 | 65.637 | 0.001 | 6.130 | 0.098 | 6.095 | 37 | 7  | 157.612.081 | PTFRNF.PTFRNF.PTFRNF | Body/Body/Body |
| cg0810647  | 2.94E-01 | 1.31E-01 | 0.814 | 60.181 | 0.656 | 65.637 | 0.001 | 6.130 | 0.098 | 6.095 | 37 | 7  | 157.612.081 | PTFRNF.PTFRNF.PTFRNF | Body/Body/Body |
| cg0810647  | 2.94E-01 | 1.31E-01 | 0.814 | 60.181 | 0.656 | 65.637 | 0.001 | 6.130 | 0.098 | 6.095 | 37 | 7  | 157.612.081 | PTFRNF.PTFRNF.PTFRNF | Body/Body/Body |
| cg0810647  | 2.94E-01 | 1.31E-01 | 0.814 | 60.181 | 0.656 | 65.637 | 0.001 | 6.130 | 0.098 | 6.095 | 37 | 7  | 157.612.081 | PTFRNF.PTFRNF.PTFRNF | Body/Body/Body |
| cg0810647  | 2.94E-01 | 1.31E-01 | 0.814 | 60.181 | 0.656 | 65.637 | 0.001 | 6.130 | 0.098 | 6.095 | 37 | 7  | 157.612.081 | PTFRNF.PTFRNF.PTFRNF | Body/Body/Body |
| cg0810647  | 2.94E-01 | 1.31E-01 | 0.814 | 60.181 | 0.656 | 65.637 | 0.001 | 6.130 | 0.098 | 6.095 | 37 | 7  | 157.612.081 | PTFRNF.PTFRNF.PTFRNF | Body/Body/Body |
| cg0810647  | 2.94E-01 | 1.31E-01 | 0.814 | 60.181 | 0.656 | 65.637 | 0.001 | 6.130 | 0.098 | 6.095 | 37 | 7  | 157.612.081 | PTFRNF.PTFRNF.PTFRNF | Body/Body/Body |
| cg0810647  | 2.94E-01 | 1.31E-01 | 0.814 | 60.181 | 0.656 | 65.637 | 0.001 | 6.130 | 0.098 | 6.095 | 37 | 7  | 157.612.081 | PTFRNF.PTFRNF.PTFRNF | Body/Body/Body |
| cg0810647  | 2.94E-01 | 1.31E-01 | 0.814 | 60.181 | 0.656 | 65.637 | 0.001 | 6.130 | 0.098 | 6.095 | 37 | 7  | 157.612.081 | PTFRNF.PTFRNF.PTFRNF | Body/Body/Body |
| cg0810647  | 2.94E-01 | 1.31E-01 | 0.814 | 60.181 | 0.656 | 65.637 | 0.001 | 6.130 | 0.098 | 6.095 | 37 | 7  | 157.612.081 | PTFRNF.PTFRNF.PTFRNF | Body/Body/Body |
| cg0810647  | 2.94E-01 | 1.31E-01 | 0.814 | 60.181 | 0.656 | 65.637 | 0.001 | 6.130 | 0.098 | 6.095 | 37 | 7  | 157.612.081 | PTFRNF.PTFRNF.PTFRNF | Body/Body/Body |
| cg0810647  | 2.94E-01 | 1.31E-01 | 0.814 | 60.181 | 0.656 | 65.637 | 0.001 | 6.130 | 0.098 | 6.095 | 37 | 7  | 157.612.081 | PTFRNF.PTFRNF.PTFRNF | Body/Body/Body |
| cg0810647  | 2.94E-01 | 1.31E-01 | 0.814 | 60.181 | 0.656 | 65.637 | 0.001 | 6.130 | 0.098 | 6.095 | 37 | 7  | 157.612.081 | PTFRNF.PTFRNF.PTFRNF | Body/Body/Body |
| cg0810647  | 2.94E-01 | 1.31E-01 | 0.814 | 60.181 | 0.656 | 65.637 | 0.001 | 6.130 | 0.098 | 6.095 | 37 | 7  | 157.612.081 | PTFRNF.PTFRNF.PTFRNF | Body/Body/Body |
| cg0810647  | 2.94E-01 | 1.31E-01 | 0.814 | 60.181 | 0.656 | 65.637 | 0.001 | 6.130 | 0.098 | 6.095 | 37 | 7  | 157.612.081 | PTFRNF.PTFRNF.PTFRNF | Body/Body/Body |
| cg0810647  | 2.94E-01 | 1.31E-01 | 0.814 | 60.181 | 0.656 | 65.637 | 0.001 | 6.130 | 0.098 | 6.095 | 37 | 7  | 157.612.081 | PTFRNF.PTFRNF.PTFRNF | Body/Body/Body |
| cg0810647  | 2.94E-01 | 1.31E-01 | 0.814 | 60.181 | 0.656 | 65.637 | 0.001 | 6.130 | 0.098 | 6.095 | 37 | 7  | 157.612.081 | PTFRNF.PTFRNF.PTFRNF | Body/Body/Body |
| cg0810647  | 2.94E-01 | 1.31E-01 | 0.814 | 60.181 | 0.656 | 65.637 | 0.001 | 6.130 | 0.098 | 6.095 | 37 | 7  | 157.612.081 | PTFRNF.PTFRNF.PTFRNF | Body/Body/Body |
| cg0810647  | 2.94E-01 | 1.31E-01 | 0.814 | 60.181 | 0.656 | 65.637 | 0.001 | 6.130 | 0.098 | 6.095 | 37 | 7  | 157.612.081 | PTFRNF.PTFRNF.PTFRNF | Body/Body/Body |
| cg0810647  | 2.94E-01 | 1.31E-01 | 0.814 | 60.181 | 0.656 | 65.637 | 0.001 | 6.130 | 0.098 | 6.095 | 37 | 7  | 157.612.081 | PTFRNF.PTFRNF.PTFRNF | Body/Body/Body |
| cg0810647  | 2.94E-01 | 1.31E-01 | 0.814 | 60.181 | 0.656 | 65.637 | 0.001 | 6.130 | 0.098 | 6.095 | 37 | 7  | 157.612.081 | PTFRNF.PTFRNF.PTFRNF | Body/Body/Body |
| cg0810647  | 2.94E-01 | 1.31E-01 | 0.814 | 60.181 | 0.656 | 65.637 | 0.001 | 6.130 | 0.098 | 6.095 | 37 | 7  | 157.612.081 | PTFRNF.PTFRNF.PTFRNF | Body/Body/Body |
| cg0810647  | 2.94E-01 | 1.31E-01 | 0.814 | 60.181 | 0.656 | 65.637 | 0.001 | 6.130 | 0.098 | 6.095 | 37 | 7  | 157.612.081 | PTFRNF.PTFRNF.PTFRNF | Body/Body/Body |
| cg0810647  | 2.94E-01 | 1.31E-01 | 0.814 | 60.181 | 0.656 | 65.637 | 0.001 | 6.130 | 0.098 | 6.095 | 37 | 7  | 157.612.081 | PTFRNF.PTFRNF.PTFRNF | Body/Body/Body |
| cg0810647  | 2.94E-01 | 1.31E-01 | 0.814 | 60.181 | 0.656 | 65.637 | 0.001 | 6.130 | 0.098 | 6.095 | 37 | 7  | 157.612.081 | PTFRNF.PTFRNF.PTFRNF | Body/Body/Body |
| cg0810647  | 2.94E-01 | 1.31E-01 | 0.814 | 60.181 | 0.656 | 65.637 | 0.001 | 6.130 | 0.098 | 6.095 | 37 | 7  | 157.612.081 | PTFRNF.PTFRNF.PTFRNF | Body/Body/Body |
| cg0810647  | 2.94E-01 | 1.31E-01 | 0.814 | 60.181 | 0.656 | 65.637 | 0.001 | 6.130 | 0.098 | 6.095 | 37 | 7  | 157.612.081 | PTFRNF.PTFRNF.PTFRNF | Body/Body/Body |
| cg0810647  | 2.94E-01 | 1.31E-01 | 0.814 | 60.181 | 0.656 | 65.637 | 0.001 | 6.130 | 0.098 | 6.095 | 37 | 7  | 157.612.081 | PTFRNF.PTFRNF.PTFRNF | Body/Body/Body |
| cg0810647  | 2.94E-01 | 1.31E-01 | 0.814 | 60.181 | 0.656 | 65.637 | 0.001 | 6.130 | 0.098 | 6.095 | 37 | 7  |             |                      |                |







[illegible]



|           |          |          |       |        |       |        |       |       |       |       |    |    |             |                          |               |
|-----------|----------|----------|-------|--------|-------|--------|-------|-------|-------|-------|----|----|-------------|--------------------------|---------------|
| 000260340 | 3.61E-02 | 4.02E-01 | 0.805 | 80.476 | 0.832 | 83.204 | 0.042 | 4.226 | 0.025 | 2.450 | 37 | 7  | 158.107.728 | PPFRGZ.PPFRGZ.PPFRGZ     | Body          |
| 000260340 | 3.64E-02 | 4.04E-01 | 0.804 | 10.447 | 0.080 | 8.039  | 0.021 | 2.139 | 0.021 | 2.139 | 37 | 7  | 150.513.749 | ELAVL4.ELAVL4            | 1stEon5UTR    |
| 000260340 | 3.64E-02 | 4.04E-01 | 0.804 | 12.710 | 0.080 | 8.238  | 0.027 | 2.346 | 0.027 | 2.346 | 37 | 7  | 150.513.749 | CHNPA5                   | Body          |
| 000130748 | 3.66E-02 | 4.04E-01 | 0.828 | 82.278 | 0.846 | 84.581 | 0.024 | 2.991 | 0.024 | 2.991 | 7  | 3  | 157.474.965 | PPFRGZ.PPFRGZ.PPFRGZ     | Body          |
| 000247378 | 3.70E-02 | 4.06E-01 | 0.868 | 66.830 | 0.632 | 63.188 | 0.028 | 2.768 | 0.028 | 2.768 | 37 | 3  | 105.221.308 | ALCAM                    | Body          |
| 000260391 | 3.71E-02 | 4.06E-01 | 0.828 | 82.033 | 0.815 | 82.033 | 0.028 | 2.987 | 0.028 | 2.987 | 37 | 3  | 157.384.035 | PPFRGZ.PPFRGZ.PPFRGZ     | Body          |
| 000169430 | 3.71E-02 | 4.06E-01 | 0.800 | 60.001 | 0.619 | 61.895 | 0.050 | 5.016 | 0.047 | 4.698 | 37 | 3  | 111.484.977 | CBX01                    | Body          |
| 000260310 | 3.71E-02 | 4.07E-01 | 4.135 | 4.135  | 0.000 | 4.881  | 0.010 | 0.881 | 0.010 | 0.881 | 12 | 18 | 87.425.102  | MAPLCCB.FBXO31           | 1stUTR.TSS100 |
| 000904120 | 3.73E-02 | 4.07E-01 | 0.052 | 8.213  | 0.008 | 5.771  | 0.016 | 0.933 | 0.012 | 1.199 | 37 | 3  | 87.417.818  | FBXO31.FBXO31            | TSS100Body    |
| 000260280 | 3.78E-02 | 4.07E-01 | 0.810 | 80.865 | 0.831 | 83.057 | 0.024 | 2.432 | 0.024 | 2.434 | 37 | 3  | 157.760.055 | PPFRGZ.PPFRGZ.PPFRGZ     | Body          |
| 000102176 | 3.77E-02 | 4.10E-01 | 0.762 | 67.671 | 0.708 | 69.815 | 0.086 | 8.911 | 0.086 | 8.911 | 37 | 3  | 37.303.114  | MES2.MES2.MES2.MES2.MES2 | Body          |
| 000102176 | 3.77E-02 | 4.10E-01 | 0.762 | 75.562 | 0.785 | 76.499 | 0.049 | 4.888 | 0.043 | 4.206 | 37 | 3  | 157.93.035  | MES2.MES2.MES2.MES2.MES2 | Body          |
| 000102176 | 3.77E-02 | 4.10E-01 | 0.762 | 75.562 | 0.785 | 76.499 | 0.049 | 4.888 | 0.043 | 4.206 | 37 | 3  | 157.93.035  | MES2.MES2.MES2.MES2.MES2 | Body          |
| 000102176 | 3.77E-02 | 4.10E-01 | 0.762 | 75.562 | 0.785 | 76.499 | 0.049 | 4.888 | 0.043 | 4.206 | 37 | 3  | 157.93.035  | MES2.MES2.MES2.MES2.MES2 | Body          |
| 000102176 | 3.77E-02 | 4.10E-01 | 0.762 | 75.562 | 0.785 | 76.499 | 0.049 | 4.888 | 0.043 | 4.206 | 37 | 3  | 157.93.035  | MES2.MES2.MES2.MES2.MES2 | Body          |
| 000102176 | 3.77E-02 | 4.10E-01 | 0.762 | 75.562 | 0.785 | 76.499 | 0.049 | 4.888 | 0.043 | 4.206 | 37 | 3  | 157.93.035  | MES2.MES2.MES2.MES2.MES2 | Body          |
| 000102176 | 3.77E-02 | 4.10E-01 | 0.762 | 75.562 | 0.785 | 76.499 | 0.049 | 4.888 | 0.043 | 4.206 | 37 | 3  | 157.93.035  | MES2.MES2.MES2.MES2.MES2 | Body          |
| 000102176 | 3.77E-02 | 4.10E-01 | 0.762 | 75.562 | 0.785 | 76.499 | 0.049 | 4.888 | 0.043 | 4.206 | 37 | 3  | 157.93.035  | MES2.MES2.MES2.MES2.MES2 | Body          |
| 000102176 | 3.77E-02 | 4.10E-01 | 0.762 | 75.562 | 0.785 | 76.499 | 0.049 | 4.888 | 0.043 | 4.206 | 37 | 3  | 157.93.035  | MES2.MES2.MES2.MES2.MES2 | Body          |
| 000102176 | 3.77E-02 | 4.10E-01 | 0.762 | 75.562 | 0.785 | 76.499 | 0.049 | 4.888 | 0.043 | 4.206 | 37 | 3  | 157.93.035  | MES2.MES2.MES2.MES2.MES2 | Body          |
| 000102176 | 3.77E-02 | 4.10E-01 | 0.762 | 75.562 | 0.785 | 76.499 | 0.049 | 4.888 | 0.043 | 4.206 | 37 | 3  | 157.93.035  | MES2.MES2.MES2.MES2.MES2 | Body          |
| 000102176 | 3.77E-02 | 4.10E-01 | 0.762 | 75.562 | 0.785 | 76.499 | 0.049 | 4.888 | 0.043 | 4.206 | 37 | 3  | 157.93.035  | MES2.MES2.MES2.MES2.MES2 | Body          |
| 000102176 | 3.77E-02 | 4.10E-01 | 0.762 | 75.562 | 0.785 | 76.499 | 0.049 | 4.888 | 0.043 | 4.206 | 37 | 3  | 157.93.035  | MES2.MES2.MES2.MES2.MES2 | Body          |
| 000102176 | 3.77E-02 | 4.10E-01 | 0.762 | 75.562 | 0.785 | 76.499 | 0.049 | 4.888 | 0.043 | 4.206 | 37 | 3  | 157.93.035  | MES2.MES2.MES2.MES2.MES2 | Body          |
| 000102176 | 3.77E-02 | 4.10E-01 | 0.762 | 75.562 | 0.785 | 76.499 | 0.049 | 4.888 | 0.043 | 4.206 | 37 | 3  | 157.93.035  | MES2.MES2.MES2.MES2.MES2 | Body          |
| 000102176 | 3.77E-02 | 4.10E-01 | 0.762 | 75.562 | 0.785 | 76.499 | 0.049 | 4.888 | 0.043 | 4.206 | 37 | 3  | 157.93.035  | MES2.MES2.MES2.MES2.MES2 | Body          |
| 000102176 | 3.77E-02 | 4.10E-01 | 0.762 | 75.562 | 0.785 | 76.499 | 0.049 | 4.888 | 0.043 | 4.206 | 37 | 3  | 157.93.035  | MES2.MES2.MES2.MES2.MES2 | Body          |
| 000102176 | 3.77E-02 | 4.10E-01 | 0.762 | 75.562 | 0.785 | 76.499 | 0.049 | 4.888 | 0.043 | 4.206 | 37 | 3  | 157.93.035  | MES2.MES2.MES2.MES2.MES2 | Body          |
| 000102176 | 3.77E-02 | 4.10E-01 | 0.762 | 75.562 | 0.785 | 76.499 | 0.049 | 4.888 | 0.043 | 4.206 | 37 | 3  | 157.93.035  | MES2.MES2.MES2.MES2.MES2 | Body          |
| 000102176 | 3.77E-02 | 4.10E-01 | 0.762 | 75.562 | 0.785 | 76.499 | 0.049 | 4.888 | 0.043 | 4.206 | 37 | 3  | 157.93.035  | MES2.MES2.MES2.MES2.MES2 | Body          |
| 000102176 | 3.77E-02 | 4.10E-01 | 0.762 | 75.562 | 0.785 | 76.499 | 0.049 | 4.888 | 0.043 | 4.206 | 37 | 3  | 157.93.035  | MES2.MES2.MES2.MES2.MES2 | Body          |
| 000102176 | 3.77E-02 | 4.10E-01 | 0.762 | 75.562 | 0.785 | 76.499 | 0.049 | 4.888 | 0.043 | 4.206 | 37 | 3  | 157.93.035  | MES2.MES2.MES2.MES2.MES2 | Body          |
| 000102176 | 3.77E-02 | 4.10E-01 | 0.762 | 75.562 | 0.785 | 76.499 | 0.049 | 4.888 | 0.043 | 4.206 | 37 | 3  | 157.93.035  | MES2.MES2.MES2.MES2.MES2 | Body          |
| 000102176 | 3.77E-02 | 4.10E-01 | 0.762 | 75.562 | 0.785 | 76.499 | 0.049 | 4.888 | 0.043 | 4.206 | 37 | 3  | 157.93.035  | MES2.MES2.MES2.MES2.MES2 | Body          |
| 000102176 | 3.77E-02 | 4.10E-01 | 0.762 | 75.562 | 0.785 | 76.499 | 0.049 | 4.888 | 0.043 | 4.206 | 37 | 3  | 157.93.035  | MES2.MES2.MES2.MES2.MES2 | Body          |
| 000102176 | 3.77E-02 | 4.10E-01 | 0.762 | 75.562 | 0.785 | 76.499 | 0.049 | 4.888 | 0.043 | 4.206 | 37 | 3  | 157.93.035  | MES2.MES2.MES2.MES2.MES2 | Body          |
| 000102176 | 3.77E-02 | 4.10E-01 | 0.762 | 75.562 | 0.785 | 76.499 | 0.049 | 4.888 | 0.043 | 4.206 | 37 | 3  | 157.93.035  | MES2.MES2.MES2.MES2.MES2 | Body          |
| 000102176 | 3.77E-02 | 4.10E-01 | 0.762 | 75.562 | 0.785 | 76.499 | 0.049 | 4.888 | 0.043 | 4.206 | 37 | 3  | 157.93.035  | MES2.MES2.MES2.MES2.MES2 | Body          |
| 000102176 | 3.77E-02 | 4.10E-01 | 0.762 | 75.562 | 0.785 | 76.499 | 0.049 | 4.888 | 0.043 | 4.206 | 37 | 3  | 157.93.035  | MES2.MES2.MES2.MES2.MES2 | Body          |
| 000102176 | 3.77E-02 | 4.10E-01 | 0.762 | 75.562 | 0.785 | 76.499 | 0.049 | 4.888 | 0.043 | 4.206 | 37 | 3  | 157.93.035  | MES2.MES2.MES2.MES2.MES2 | Body          |
| 000102176 | 3.77E-02 | 4.10E-01 | 0.762 | 75.562 | 0.785 | 76.499 | 0.049 | 4.888 | 0.043 | 4.206 | 37 | 3  | 157.93.035  | MES2.MES2.MES2.MES2.MES2 | Body          |
| 000102176 | 3.77E-02 | 4.10E-01 | 0.762 | 75.562 | 0.785 | 76.499 | 0.049 | 4.888 | 0.043 | 4.206 | 37 | 3  | 157.93.035  | MES2.MES2.MES2.MES2.MES2 | Body          |
| 000102176 | 3.77E-02 | 4.10E-01 | 0.762 | 75.562 | 0.785 | 76.499 | 0.049 | 4.888 | 0.043 | 4.206 | 37 | 3  | 157.93.035  | MES2.MES2.MES2.MES2.MES2 | Body          |
| 000102176 | 3.77E-02 | 4.10E-01 | 0.762 | 75.562 | 0.785 | 76.499 | 0.049 | 4.888 | 0.043 | 4.206 | 37 | 3  | 157.93.035  | MES2.MES2.MES2.MES2.MES2 | Body          |
| 000102176 | 3.77E-02 | 4.10E-01 | 0.762 | 75.562 | 0.785 | 76.499 | 0.049 | 4.888 | 0.043 | 4.206 | 37 | 3  | 157.93.035  | MES2.MES2.MES2.MES2.MES2 | Body          |
| 000102176 | 3.77E-02 | 4.10E-01 | 0.762 | 75.562 | 0.785 | 76.499 | 0.049 | 4.888 | 0.043 | 4.206 | 37 | 3  | 157.93.035  | MES2.MES2.MES2.MES2.MES2 | Body          |
| 000102176 | 3.77E-02 | 4.10E-01 | 0.762 | 75.562 | 0.785 | 76.499 | 0.049 | 4.888 | 0.043 | 4.206 | 37 | 3  | 157.93.035  | MES2.MES2.MES2.MES2.MES2 | Body          |
| 000102176 | 3.77E-02 | 4.10E-01 | 0.762 | 75.562 | 0.785 | 76.499 | 0.049 | 4.888 | 0.043 | 4.206 | 37 | 3  | 157.93.035  | MES2.MES2.MES2.MES2.MES2 | Body          |
| 000102176 | 3.77E-02 | 4.10E-01 | 0.762 | 75.562 | 0.785 | 76.499 | 0.049 | 4.888 | 0.043 | 4.206 | 37 | 3  | 157.93.035  | MES2.MES2.MES2.MES2.MES2 | Body          |
| 000102176 | 3.77E-02 | 4.10E-01 | 0.762 | 75.562 | 0.785 | 76.499 | 0.049 | 4.888 | 0.043 | 4.206 | 37 | 3  | 157.93.035  | MES2.MES2.MES2.MES2.MES2 | Body          |
| 000102176 | 3.77E-02 | 4.10E-01 | 0.762 | 75.562 | 0.785 | 76.499 | 0.049 | 4.888 | 0.043 | 4.206 | 37 | 3  | 157.93.035  | MES2.MES2.MES2.MES2.MES2 | Body          |
| 000102176 | 3.77E-02 | 4.10E-01 | 0.762 | 75.562 | 0.785 | 76.499 | 0.049 | 4.888 | 0.043 | 4.206 | 37 | 3  | 157.93.035  | MES2.MES2.MES2.MES2.MES2 | Body          |
| 000102176 | 3.77E-02 | 4.10E-01 | 0.762 | 75.562 | 0.785 | 76.499 | 0.049 | 4.888 | 0.043 | 4.206 | 37 | 3  | 157.93.035  | MES2.MES2.MES2.MES2.MES2 | Body          |
| 000102176 | 3.77E-02 | 4.10E-01 | 0.762 | 75.562 | 0.785 | 76.499 | 0.049 | 4.888 | 0.043 | 4.206 | 37 | 3  | 157.93.035  | MES2.MES2.MES2.MES2.MES2 | Body          |
| 000102176 | 3.77E-02 | 4.10E-01 | 0.762 | 75.562 | 0.785 | 76.499 | 0.049 | 4.888 | 0.043 | 4.206 | 37 | 3  | 157.93.035  | MES2.MES2.MES2.MES2.MES2 | Body          |
| 000102176 | 3.77E-02 | 4.10E-01 | 0.762 | 75.562 | 0.785 | 76.499 | 0.049 | 4.888 | 0.043 | 4.206 | 37 | 3  | 157.93.035  | MES2.MES2.MES2.MES2.MES2 | Body          |
| 000102176 | 3.77E-02 | 4.10E-01 | 0.762 | 75.562 | 0.785 | 76.499 | 0.049 | 4.888 | 0.043 | 4.206 | 37 | 3  | 157.93.035  | MES2.MES2.MES2.MES2.MES2 | Body          |
| 000102176 | 3.77E-02 | 4.10E-01 | 0.762 | 75.562 | 0.785 | 76.499 | 0.049 | 4.888 | 0.043 | 4.206 | 37 | 3  | 157.93.035  | MES2.MES2.MES2.MES2.MES2 | Body          |
| 000102176 | 3.77E-02 | 4.10E-01 | 0.762 | 75.562 | 0.785 | 76.499 | 0.049 | 4.888 | 0.043 | 4.206 | 37 | 3  | 157.93.035  | MES2.MES2.MES2.MES2.MES2 | Body          |
| 000102176 | 3.77E-02 | 4.10E-01 | 0.762 | 75.562 | 0.785 | 76.499 | 0.049 | 4.888 | 0.043 | 4.206 | 37 | 3  | 157.93.035  | MES2.MES2.MES2.MES2.MES2 | Body          |
| 000102176 | 3.77E-02 | 4.10E-01 | 0.762 | 75.562 | 0.785 | 76.499 | 0.049 | 4.888 | 0.043 | 4.206 | 37 | 3  | 157.93.035  | MES2.MES2.MES2.MES2.MES2 | Body          |
| 000102176 | 3.77E-02 | 4.10E-01 | 0.762 | 75.562 | 0.785 | 76.499 | 0.049 | 4.888 | 0.043 | 4.206 | 37 | 3  | 157.93.035  | MES2.MES2.MES2.MES2.MES2 | Body          |
| 000102176 | 3.77E-02 | 4.10E-01 | 0.762 | 75.562 | 0.785 | 76.499 | 0.049 | 4.888 | 0.043 | 4.206 | 37 | 3  | 157.93.035  | MES2.MES2.MES2.MES2.MES2 | Body          |
| 000102176 | 3.77E-02 | 4.10E-01 | 0.762 | 75.562 | 0.785 | 76.499 | 0.049 | 4.888 | 0.043 | 4.206 | 37 | 3  | 157.93.035  | MES2.MES2.MES2.MES2.MES2 | Body          |
| 000102176 | 3.77E-02 | 4.10E-01 | 0.762 | 75.562 | 0.785 | 76.499 | 0.049 | 4.888 | 0.043 | 4.206 | 37 | 3  | 157.93.035  | MES2.MES2.MES2.MES2.MES2 | Body          |
| 000102176 | 3.77E-02 | 4.10E-01 | 0.762 | 75.562 | 0.785 | 76.499 | 0.049 | 4.888 | 0.043 | 4.206 | 37 | 3  | 157.93.035  | MES2.MES2.MES2.MES2.MES2 | Body          |
| 000102176 | 3.77E-02 | 4.10E-01 | 0.762 | 75.562 | 0.785 | 76.499 | 0.049 | 4.888 | 0.043 | 4.206 | 37 | 3  | 157.93.035  | MES2.MES2.MES2.MES2.MES2 | Body          |
| 000102176 | 3.77E-02 | 4.10E-01 | 0.762 | 75.562 | 0.785 | 76.499 | 0.049 | 4.888 | 0.043 | 4.206 | 37 | 3  | 157.93.035  | MES2.MES2.MES2.MES2.MES2 | Body          |
| 000102176 | 3.77E-02 | 4.10E-01 | 0.762 | 75.562 | 0.785 | 76.499 | 0.049 | 4.888 | 0.043 | 4.206 | 37 | 3  | 157.93.035  | MES2.MES2.MES2.MES2.MES2 | Body          |
| 000102176 | 3.77E-02 | 4.10E-01 | 0.762 | 75.    |       |        |       |       |       |       |    |    |             |                          |               |



Supplementary Table S2: Overlap of differentially expressed transcript aligned probes with Ben-Hochberg correction and differentially methylated QSS sites in data of CP compared to CR without taking in consideration of human conservation (see Figure 6).

| Chromosome | Position    | Strand | QSS | unadjusted p | adj p-value | Delta CR | Methylation CR in % | Delta CP | Methylation CP in % | adj ADR | adj ADR | SDM CR in % | adj ADR | adj ADR | SDM CP in % | Delta  | Delta   | Human conservation | QSS local cat | Delta cat local cat | Gene symbol | Gene ID          | Locus                 | Tracking ID      | Mean FPKM CR | Mean FPKM CP | adj DR | adj DR | FC     | unadjusted p | adj p-value | Delta pri on                                                                      |
|------------|-------------|--------|-----|--------------|-------------|----------|---------------------|----------|---------------------|---------|---------|-------------|---------|---------|-------------|--------|---------|--------------------|---------------|---------------------|-------------|------------------|-----------------------|------------------|--------------|--------------|--------|--------|--------|--------------|-------------|-----------------------------------------------------------------------------------|
| chr1       | 5,364,941   | +      | QSS | 0.0036       | 0.0037      | 0.602    | 50.237              | 0.346    | 50.605              | 0.356   | 10.446  | 4.759       | 0.165   | 10.257  | 0.351       | -0.306 | 0.001   | 0.7                | S Share       | Interact 1/4        | AluJb1      | ENRNOG0000000000 | chr11:1050049-1050708 | ENRNOG0000000000 | 1.166        | 0.795        | 0.240  | 0.206  | 1.507  | 0.0007       | 0.0009      | African 1A transposon, transcribed 5' strand, 11 [Source MGI: MGI:109486]         |
| chr1       | 13,300,020  | +      | QSS | 0.0041       | 0.0041      | 0.907    | 16.867              | 0.607    | 16.867              | 0.607   | 19.441  | 3.932       | 0.363   | 19.334  | 3.645       | 0.500  | 0.000   | 0.7                | Open Sea      | Interact 1/21       | Novad       | ENRNOG0000000000 | chr11:1070101-1070483 | ENRNOG0000000000 | 7.166        | 5.061        | 0.560  | 0.603  | -1.496 | 0.0006       | 0.0004      | nuclear receptor co-repressor 1 [Source MGI: MGI:107000]                          |
| chr1       | 13,300,200  | +      | QSS | 0.0077       | 0.0133      | 0.436    | 45.000              | 0.703    | 70.270              | 0.369   | 26.849  | 5.374       | 0.160   | 19.207  | 3.641       | 0.267  | 0.040   | 0.6                | Open Sea      | Interact 1/21       | Novad       | ENRNOG0000000000 | chr11:1070101-1070483 | ENRNOG0000000000 | 7.166        | 5.061        | 0.560  | 0.603  | -1.496 | 0.0006       | 0.0004      | nuclear receptor co-repressor 1 [Source MGI: MGI:107000]                          |
| chr1       | 13,300,260  | +      | QSS | 0.0082       | 0.0107      | 0.520    | 50.000              | 0.703    | 70.240              | 0.580   | 6.952   | 1.700       | 0.146   | 14.805  | 3.641       | 0.203  | 0.040   | 0.6                | Open Sea      | Interact 1/21       | Novad       | ENRNOG0000000000 | chr11:1070101-1070483 | ENRNOG0000000000 | 7.166        | 5.061        | 0.560  | 0.603  | -1.496 | 0.0006       | 0.0004      | nuclear receptor co-repressor 1 [Source MGI: MGI:107000]                          |
| chr1       | 15,052,260  | +      | QSS | 0.0033       | 0.0034      | 0.217    | 21.750              | 0.510    | 51.610              | 0.110   | 11.026  | 2.385       | 0.191   | 10.913  | 3.615       | 0.280  | 0.074   | 14                 | Open Sea      | Interact 2/5        | JRS         | ENRNOG0000000000 | chr11:1070101-1070483 | ENRNOG0000000000 | 1.111        | 3.007        | 0.166  | 0.075  | 2.706  | 0.002        | 0.070       | polyoma virus 12 [Source MGI: MGI:104000]                                         |
| chr1       | 36,914,960  | +      | QSS | 0.0008       | 0.0000      | 0.600    | 60.000              | 0.306    | 30.760              | 0.167   | 16.447  | 3.333       | 0.231   | 20.039  | 4.000       | -0.200 | -0.200  | ---                | Open Sea      | Interact 1/40       | Novad137    | ENRNOG0000000000 | chr11:3720402-3740000 | ENRNOG0000000000 | 12.406       | 9.207        | 0.340  | 0.743  | -1.323 | 0.003        | 0.040       | transmembrane protein 137 [Source MGI: MGI:107010]                                |
| chr1       | 37,280,510  | +      | QSS | 0.0051       | 0.0113      | 0.706    | 76.471              | 0.475    | 47.000              | 0.130   | 12.210  | 2.442       | 0.130   | 12.946  | 2.599       | -0.200 | -0.200  | 0.6                | N Share       | TSS 1000            | Topolys     | ENRNOG0000000010 | chr11:3720402-3740000 | ENRNOG0000000000 | 22.121       | 15.620       | 1.615  | 3.138  | -1.623 | 0.007        | 0.070       | histidyl polyphosphatase 4-phosphatase, type 1 [Source MGI: MGI:109110]           |
| chr1       | 37,284,020  | +      | QSS | 0.0008       | 0.0008      | 0.717    | 71.717              | 0.862    | 86.207              | 0.126   | 12.510  | 2.706       | 0.091   | 9.001   | 1.618       | 0.140  | 14.460  | 0.7                | Open Sea      | Interact 2/7        | Topolys     | ENRNOG0000000010 | chr11:3720402-3740000 | ENRNOG0000000000 | 4.165        | 2.151        | 0.257  | 0.641  | -1.506 | 0.010        | 0.001       | hepatitis 10 [Source MGI: MGI:109000]                                             |
| chr1       | 37,281,460  | +      | QSS | 0.0190       | 0.1716      | 0.605    | 65.017              | 0.303    | 30.204              | 0.201   | 20.100  | 4.021       | 0.240   | 24.004  | 4.601       | -0.300 | -0.200  | 14                 | N Share       | Interact 1/7        | Topolys     | ENRNOG0000000010 | chr11:3720402-3740000 | ENRNOG0000000000 | 4.165        | 2.151        | 0.257  | 0.641  | -1.506 | 0.010        | 0.001       | hepatitis 10 [Source MGI: MGI:109000]                                             |
| chr1       | 43,717,810  | +      | QSS | 0.0044       | 0.4106      | 0.889    | 88.889              | 0.772    | 77.174              | 0.065   | 6.451   | 1.290       | 0.069   | 8.881   | 1.776       | -0.117 | -11.716 | ---                | Open Sea      | Interact 1/14       | Unat        | ENRNOG0000000020 | chr11:4216011-4267741 | ENRNOG0000000000 | 4.504        | 6.720        | 0.526  | 0.727  | 1.445  | 0.010        | 0.005       | UDP-glucuronate deacetylase 1 [Source MGI: MGI:109510]                            |
| chr1       | 43,717,820  | +      | QSS | 0.0041       | 0.3078      | 0.682    | 68.217              | 0.704    | 70.235              | 0.053   | 5.205   | 1.051       | 0.058   | 8.627   | 0.545       | 0.110  | 11.100  | ---                | Open Sea      | Interact 1/14       | Unat        | ENRNOG0000000020 | chr11:4216011-4267741 | ENRNOG0000000000 | 4.504        | 6.720        | 0.526  | 0.727  | 1.445  | 0.010        | 0.005       | UDP-glucuronate deacetylase 1 [Source MGI: MGI:109510]                            |
| chr1       | 43,718,720  | +      | QSS | 0.0059       | 0.1714      | 0.606    | 60.581              | 0.700    | 70.210              | 0.059   | 5.822   | 1.170       | 0.062   | 6.110   | 1.224       | 0.167  | 16.700  | ---                | Open Sea      | Interact 1/14       | Unat        | ENRNOG0000000020 | chr11:4216011-4267741 | ENRNOG0000000000 | 4.504        | 6.720        | 0.526  | 0.727  | 1.445  | 0.010        | 0.005       | UDP-glucuronate deacetylase 1 [Source MGI: MGI:109510]                            |
| chr1       | 58,582,440  | +      | QSS | 0.0030       | 0.3860      | 0.887    | 89.744              | 0.667    | 66.607              | 0.083   | 8.341   | 1.448       | 0.183   | 19.333  | 3.884       | -0.201 | -0.200  | ---                | Open Sea      | Interact 2/2        | NAL3A       | ENRNOG0000000030 | chr11:5858000-5858004 | ENRNOG0000000000 | 46.962       | 64.251       | 2.623  | 5.004  | 1.309  | 0.005        | 0.003       | NADH dehydrogenase (ubiquinone), 1 subunit 3 [Source MGI: MGI:109100]             |
| chr1       | 60,948,160  | +      | QSS | 0.0002       | 0.0000      | 0.704    | 70.370              | 0.403    | 40.308              | 0.387   | 38.710  | 7.147       | 0.166   | 16.563  | 3.317       | -0.200 | -0.200  | 0.5                | Open Sea      | Interact 1/60       | Unat        | ENRNOG0000000040 | chr11:6094800-6094804 | ENRNOG0000000000 | 10.321       | 6.944        | 0.729  | 1.372  | -1.008 | 0.003        | 0.000       | urocortin 3 [Source MGI: MGI:109500]                                              |
| chr1       | 60,948,660  | +      | QSS | 0.0003       | 0.0004      | 0.609    | 60.807              | 0.805    | 80.464              | 0.210   | 21.187  | 4.237       | 0.154   | 16.413  | 2.083       | 0.208  | 20.627  | ---                | Open Sea      | Interact 2/5        | Unat        | ENRNOG0000000040 | chr11:6094800-6094804 | ENRNOG0000000000 | 7.248        | 4.008        | 0.620  | 1.403  | -1.796 | 0.004        | 0.004       | urocortin 3 [Source MGI: MGI:109500]                                              |
| chr1       | 60,948,660  | +      | QSS | 0.0003       | 0.0004      | 0.609    | 60.807              | 0.805    | 80.464              | 0.210   | 21.187  | 4.237       | 0.154   | 16.413  | 2.083       | 0.208  | 20.627  | ---                | Open Sea      | Interact 1/60       | Unat        | ENRNOG0000000040 | chr11:6094800-6094804 | ENRNOG0000000000 | 7.248        | 4.008        | 0.620  | 1.403  | -1.796 | 0.004        | 0.004       | urocortin 3 [Source MGI: MGI:109500]                                              |
| chr1       | 60,948,660  | +      | QSS | 0.0003       | 0.0004      | 0.609    | 60.807              | 0.805    | 80.464              | 0.210   | 21.187  | 4.237       | 0.154   | 16.413  | 2.083       | 0.208  | 20.627  | ---                | Open Sea      | Interact 1/60       | Unat        | ENRNOG0000000040 | chr11:6094800-6094804 | ENRNOG0000000000 | 7.248        | 4.008        | 0.620  | 1.403  | -1.796 | 0.004        | 0.004       | urocortin 3 [Source MGI: MGI:109500]                                              |
| chr1       | 60,948,760  | +      | QSS | 0.0051       | 0.1121      | 0.440    | 44.000              | 0.760    | 76.160              | 0.202   | 20.200  | 5.040       | 0.156   | 16.502  | 3.140       | 0.302  | 30.160  | 7.7                | N Share       | Interact 2/2        | Unat        | ENRNOG0000000040 | chr11:6094800-6094804 | ENRNOG0000000000 | 7.248        | 4.008        | 0.620  | 1.403  | -1.796 | 0.004        | 0.004       | urocortin 3 [Source MGI: MGI:109500]                                              |
| chr1       | 60,948,760  | +      | QSS | 0.0051       | 0.1121      | 0.440    | 44.000              | 0.760    | 76.160              | 0.202   | 20.200  | 5.040       | 0.156   | 16.502  | 3.140       | 0.302  | 30.160  | 7.7                | N Share       | Check manually      | Unat        | ENRNOG0000000040 | chr11:6094800-6094804 | ENRNOG0000000000 | 7.248        | 4.008        | 0.620  | 1.403  | -1.796 | 0.004        | 0.004       | urocortin 3 [Source MGI: MGI:109500]                                              |
| chr1       | 76,948,060  | +      | QSS | 0.0077       | 0.0003      | 0.610    | 60.076              | 0.803    | 80.330              | 0.260   | 26.190  | 5.100       | 0.141   | 17.141  | 3.029       | 0.204  | 20.260  | 14                 | Open Sea      | Interact 1/10       | Novad       | ENRNOG0000000050 | chr11:7694800-7694804 | ENRNOG0000000000 | 1.051        | 2.013        | 0.677  | 0.608  | 1.943  | 0.002        | 0.002       | phenylethanolamine N-methyltransferase 1 [Source MGI: MGI:104000]                 |
| chr1       | 82,126,060  | +      | QSS | 0.0044       | 0.0007      | 0.406    | 40.626              | 0.700    | 70.471              | 0.246   | 24.411  | 4.022       | 0.140   | 14.018  | 3.004       | 0.308  | 30.860  | 10                 | Open Sea      | Interact 5/6        | Novad       | ENRNOG0000000060 | chr11:8212600-8212604 | ENRNOG0000000000 | 12.015       | 9.713        | 0.774  | 1.044  | -1.237 | 0.004        | 0.000       | phosphatidylcholine transferase 1 [Source MGI: MGI:109410]                        |
| chr1       | 82,121,167  | +      | QSS | 0.0036       | 0.0044      | 0.607    | 60.714              | 0.760    | 76.947              | 0.278   | 27.838  | 5.164       | 0.151   | 17.111  | 3.432       | 0.162  | 16.200  | ---                | Open Sea      | Interact 6/7        | Gen 0504    | ENRNOG0000000070 | chr11:8212600-8212604 | ENRNOG0000000000 | 2.057        | 1.914        | 0.218  | 0.323  | -1.386 | 0.004        | 0.010       | proteoglycan 4 [Source MGI: MGI:109100]                                           |
| chr1       | 82,129,960  | +      | QSS | 0.0036       | 0.0044      | 0.607    | 60.714              | 0.760    | 76.947              | 0.278   | 27.838  | 5.164       | 0.151   | 17.111  | 3.432       | 0.162  | 16.200  | ---                | Open Sea      | Interact 6/7        | Gen 0504    | ENRNOG0000000070 | chr11:8212600-8212604 | ENRNOG0000000000 | 2.057        | 1.914        | 0.218  | 0.323  | -1.386 | 0.004        | 0.010       | proteoglycan 4 [Source MGI: MGI:109100]                                           |
| chr1       | 130,124,440 | +      | QSS | 0.0004       | 0.1617      | 0.214    | 27.419              | 0.514    | 51.428              | 0.166   | 16.311  | 3.214       | 0.260   | 26.026  | 4.005       | 0.240  | 24.000  | 74                 | N Share       | Interact 3/5        | Novad       | ENRNOG0000000080 | chr11:1301240-1301244 | ENRNOG0000000000 | 6.071        | 4.244        | 0.866  | 1.027  | -1.036 | 0.004        | 0.000       | 6-phosphogluconate 3-epimerase 2 [Source MGI: MGI:109100]                         |
| chr1       | 132,948,200 | +      | QSS | 0.0067       | 0.0033      | 0.303    | 30.700              | 0.710    | 70.910              | 0.303   | 30.219  | 4.444       | 0.262   | 26.171  | 5.025       | 0.246  | 24.607  | 0.7                | Open Sea      | Interact 1/21       | Novad       | ENRNOG0000000090 | chr11:1329480-1329484 | ENRNOG0000000000 | 9.360        | 8.208        | 0.403  | 0.616  | -1.212 | 0.005        | 0.006       | Shp 2 binding, cytosolic isoform of SHP2 domain factor 1 [Source MGI: MGI:109500] |
| chr1       | 132,948,200 | +      | QSS | 0.0067       | 0.0033      | 0.303    | 30.700              | 0.710    | 70.910              | 0.303   | 30.219  | 4.444       | 0.262   | 26.171  | 5.025       | 0.246  | 24.607  | 0.7                | Open Sea      | Interact 1/21       | Novad       | ENRNOG0000000090 | chr11:1329480-1329484 | ENRNOG0000000000 | 9.360        | 8.208        | 0.403  | 0.616  | -1.212 | 0.005        | 0.006       | Shp 2 binding, cytosolic isoform of SHP2 domain factor 1 [Source MGI: MGI:109500] |
| chr1       | 132,948,200 | +      | QSS | 0.0067       | 0.0033      | 0.303    | 30.700              | 0.710    | 70.910              | 0.303   | 30.219  | 4.444       | 0.262   | 26.171  | 5.025       | 0.246  | 24.607  | 0.7                | Open Sea      | Interact 1/21       | Novad       | ENRNOG0000000090 | chr11:1329480-1329484 | ENRNOG0000000000 | 9.360        | 8.208        | 0.403  | 0.616  | -1.212 | 0.005        | 0.006       | Shp 2 binding, cytosolic isoform of SHP2 domain factor 1 [Source MGI: MGI:109500] |
| chr1       | 132,948,200 | +      | QSS | 0.0067       | 0.0033      | 0.303    | 30.700              | 0.710    | 70.910              | 0.303   | 30.219  | 4.444       | 0.262   | 26.171  | 5.025       | 0.246  | 24.607  | 0.7                | Open Sea      | Interact 1/21       | Novad       | ENRNOG0000000090 | chr11:1329480-1329484 | ENRNOG0000000000 | 9.360        | 8.208        | 0.403  | 0.616  | -1.212 | 0.005        | 0.006       | Shp 2 binding, cytosolic isoform of SHP2 domain factor 1 [Source MGI: MGI:109500] |
| chr1       | 132,948,200 | +      | QSS | 0.0067       | 0.0033      | 0.303    | 30.700              | 0.710    | 70.910              | 0.303   | 30.219  | 4.444       | 0.262   | 26.171  | 5.025       | 0.246  | 24.607  | 0.7                | Open Sea      | Interact 1/21       | Novad       | ENRNOG0000000090 | chr11:1329480-1329484 | ENRNOG0000000000 | 9.360        | 8.208        | 0.403  | 0.616  | -1.212 | 0.005        | 0.006       | Shp 2 binding, cytosolic isoform of SHP2 domain factor 1 [Source MGI: MGI:109500] |
| chr1       | 132,948,200 | +      | QSS | 0.0067       | 0.0033      | 0.303    | 30.700              | 0.710    | 70.910              | 0.303   | 30.219  | 4.444       | 0.262   | 26.171  | 5.025       | 0.246  | 24.607  | 0.7                | Open Sea      | Interact 1/21       | Novad       | ENRNOG0000000090 | chr11:1329480-1329484 | ENRNOG0000000000 | 9.360        | 8.208        | 0.403  | 0.616  | -1.212 | 0.005        | 0.006       | Shp 2 binding, cytosolic isoform of SHP2 domain factor 1 [Source MGI: MGI:109500] |
| chr1       | 132,948,200 | +      | QSS | 0.0067       | 0.0033      | 0.303    | 30.700              | 0.710    | 70.910              | 0.303   | 30.219  | 4.444       | 0.262   | 26.171  | 5.025       | 0.246  | 24.607  | 0.7                | Open Sea      | Interact 1/21       | Novad       | ENRNOG0000000090 | chr11:1329480-1329484 | ENRNOG0000000000 | 9.360        | 8.208        | 0.403  | 0.616  | -1.212 | 0.005        | 0.006       | Shp 2 binding, cytosolic isoform of SHP2 domain factor 1 [Source MGI: MGI:109500] |
| chr1       | 132,948,200 | +      | QSS | 0.0067       | 0.0033      | 0.303    | 30.700              | 0.710    | 70.910              | 0.303   | 30.219  | 4.444       | 0.262   | 26.171  | 5.025       | 0.246  | 24.607  | 0.7                | Open Sea      | Interact 1/21       | Novad       | ENRNOG0000       |                       |                  |              |              |        |        |        |              |             |                                                                                   |



|       |             |   |    |        |        |       |        |       |        |       |        |       |       |        |       |        |         |                |          |                |         |                   |                         |                   |        |        |       |       |        |        |        |                                                                                                                |
|-------|-------------|---|----|--------|--------|-------|--------|-------|--------|-------|--------|-------|-------|--------|-------|--------|---------|----------------|----------|----------------|---------|-------------------|-------------------------|-------------------|--------|--------|-------|-------|--------|--------|--------|----------------------------------------------------------------------------------------------------------------|
| chr11 | 74,411,729  | + | CG | 0.0421 | 0.0074 | 0.839 | 83.871 | 0.542 | 54.107 | 0.211 | 21.063 | 4.213 | 0.362 | 38.231 | 7.146 | -0.207 | -28.794 | ---            | Open Sea | Interact 14/24 | RefSeq1 | ENM1JG51000000807 | chr11:74082025-7408186  | ENM1JG51000001021 | 26.601 | 15.848 | 5.333 | 6.221 | -1.886 | 0.0053 | 0.0075 | BNP1 G'Wash including protein 2 [Source MGI; Synthesized MGI; 3008262]                                         |
| chr11 | 74,430,680  | + | CG | 0.0402 | 0.0584 | 0.384 | 26.356 | 0.802 | 66.216 | 0.337 | 33.721 | 4.746 | 0.173 | 17.309 | 3.442 | 0.279  | 27.803  | ---            | Open Sea | Interact 8/24  | RefSeq1 | ENM1JG51000000807 | chr11:74082025-7408186  | ENM1JG51000001021 | 26.601 | 15.848 | 5.333 | 6.221 | -1.886 | 0.0053 | 0.0075 | BNP1 G'Wash including protein 2 [Source MGI; Synthesized MGI; 3008262]                                         |
| chr11 | 74,430,140  | + | CG | 0.0401 | 0.0583 | 0.227 | 22.727 | 0.503 | 34.269 | 0.349 | 34.028 | 4.166 | 0.254 | 23.418 | 4.484 | 0.235  | 35.523  | ---            | Open Sea | Interact 8/24  | RefSeq1 | ENM1JG51000000807 | chr11:74082025-7408186  | ENM1JG51000001021 | 26.601 | 15.848 | 5.333 | 6.221 | -1.886 | 0.0053 | 0.0075 | BNP1 G'Wash including protein 2 [Source MGI; Synthesized MGI; 3008262]                                         |
| chr11 | 74,432,723  | + | CG | 0.0086 | 0.0080 | 0.235 | 23.529 | 0.581 | 59.041 | 0.260 | 19.162 | 3.146 | 0.285 | 28.519 | 5.154 | 0.266  | 35.561  | Check manually | Open Sea | Interact 2/24  | RefSeq1 | ENM1JG51000000807 | chr11:74082025-7408186  | ENM1JG51000001021 | 26.601 | 15.848 | 5.333 | 6.221 | -1.886 | 0.0053 | 0.0075 | BNP1 G'Wash including protein 2 [Source MGI; Synthesized MGI; 3008262]                                         |
| chr11 | 74,870,626  | + | CG | 0.0401 | 0.004  | 0.875 | 87.507 | 0.652 | 65.217 | 0.452 | 42.160 | 4.138 | 0.368 | 38.644 | 7.169 | -0.223 | -28.263 | ---            | Open Sea | Interact 2/23  | Splice2 | ENM1JG51000000801 | chr11:74084025-7408180  | ENM1JG51000000799 | 4.309  | 2.808  | 0.528 | 0.654 | -1.525 | 0.0047 | 0.0051 | sm G' protein signaling module 2 [Source MGI; Synthesized MGI; 2144602]                                        |
| chr11 | 75,574,685  | + | CG | 0.0086 | 0.1070 | 0.435 | 43.503 | 0.645 | 64.580 | 0.145 | 14.533 | 2.407 | 0.087 | 5.735  | 1.145 | 0.230  | 22.030  | -A             | Open Sea | Interact 57/57 | Ref 1   | ENM1JG51000000274 | chr11:75588405-7558412  | ENM1JG51000000735 | 4.580  | 3.809  | 0.243 | 0.303 | -1.199 | 0.0036 | 0.0763 | neurofilament 1 [Source MGI; Synthesized MGI; 37506]                                                           |
| chr11 | 75,574,685  | + | CG | 0.0086 | 0.1070 | 0.435 | 43.503 | 0.645 | 64.580 | 0.145 | 14.533 | 2.407 | 0.087 | 5.735  | 1.145 | 0.230  | 22.030  | -A             | Open Sea | Interact 19/17 | Ref 1   | ENM1JG51000000274 | chr11:75588405-7558412  | ENM1JG51000000737 | 2.210  | 1.641  | 0.119 | 0.264 | -1.347 | 0.0035 | 0.0886 | neurofilament 1 [Source MGI; Synthesized MGI; 37506]                                                           |
| chr11 | 84,585,550  | + | CG | 0.0011 | 0.0011 | 0.182 | 18.182 | 0.550 | 55.000 | 0.375 | 37.502 | 7.000 | 0.182 | 18.203 | 3.441 | 0.368  | 36.918  | TC             | Open Sea | Interact 1/25  | Splice1 | ENM1JG51000000803 | chr11:84584025-8458180  | ENM1JG51000000168 | 4.427  | 2.054  | 0.240 | 0.309 | -2.105 | 0.0051 | 0.0346 | src family associated antigen 9 [Source MGI; Synthesized MGI; 1189844]                                         |
| chr11 | 86,583,140  | + | CG | 0.0052 | 0.0052 | 0.871 | 87.087 | 0.638 | 63.636 | 0.085 | 5.121  | 1.054 | 0.362 | 36.119 | 7.236 | -0.225 | -28.463 | ---            | Open Sea | Interact 2/11  | Splice1 | ENM1JG51000000803 | chr11:84584025-8458180  | ENM1JG51000000168 | 34.335 | 17.870 | 2.750 | 3.771 | -1.501 | 0.0051 | 0.0061 | src family associated antigen 9 [Source MGI; Synthesized MGI; 1189844]                                         |
| chr11 | 87,275,894  | + | CG | 0.0040 | 0.0031 | 0.550 | 55.000 | 0.804 | 80.353 | 0.307 | 30.693 | 4.139 | 0.211 | 21.139 | 4.238 | 0.334  | 33.353  | ---            | Open Sea | Interact 19/22 | Splice1 | ENM1JG51000000441 | chr11:87275893-8728038  | ENM1JG51000000140 | 36.435 | 20.446 | 1.400 | 2.711 | -1.283 | 0.0046 | 0.0030 | neurofilament 1 [Source MGI; Synthesized MGI; 1193358]                                                         |
| chr11 | 87,275,393  | + | CG | 0.0041 | 0.0044 | 0.472 | 47.222 | 0.646 | 64.615 | 0.244 | 24.364 | 4.873 | 0.079 | 7.162  | 1.152 | 0.174  | 17.303  | CS: meeting    | Open Sea | Interact 1/22  | Splice1 | ENM1JG51000000441 | chr11:87275893-8728038  | ENM1JG51000000140 | 36.435 | 20.446 | 1.400 | 2.711 | -1.283 | 0.0046 | 0.0030 | neurofilament 1 [Source MGI; Synthesized MGI; 1193358]                                                         |
| chr11 | 88,006,860  | + | CG | 0.0039 | 0.0033 | 0.308 | 30.834 | 0.500 | 50.000 | 0.175 | 17.536 | 3.107 | 0.300 | 30.021 | 4.456 | 0.280  | 28.167  | CA             | Open Sea | Interact 19/26 | Splice1 | ENM1JG51000000441 | chr11:88004025-8800180  | ENM1JG51000000021 | 1.082  | 3.220  | 0.333 | 0.305 | 3.001  | 0.0051 | 0.0349 | topoisomerase (DNA II) alpha [Source MGI; Synthesized MGI; 18706]                                              |
| chr11 | 105,701,142 | + | CG | 0.0027 | 0.0024 | 0.362 | 36.104 | 0.517 | 51.607 | 0.117 | 11.708 | 2.342 | 0.100 | 11.669 | 2.384 | 0.255  | 25.513  | CA             | S: Shore | Interact 1/25  | Splice1 | ENM1JG51000000340 | chr11:10559805-1055924  | ENM1JG51000000333 | 4.973  | 3.620  | 0.361 | 0.642 | -1.374 | 0.0057 | 0.0065 | fat rat adipocyte protein 1 [Source MGI; Synthesized MGI; 2444021]                                             |
| chr11 | 105,702,165 | + | CG | 0.0032 | 0.0033 | 0.444 | 44.361 | 0.639 | 63.909 | 0.289 | 28.946 | 5.199 | 0.079 | 7.756  | 1.151 | 0.165  | 16.546  | ---            | Open Sea | Interact 2/25  | Splice1 | ENM1JG51000000340 | chr11:10559805-1055924  | ENM1JG51000000333 | 4.973  | 3.620  | 0.361 | 0.642 | -1.374 | 0.0057 | 0.0065 | fat rat adipocyte protein 1 [Source MGI; Synthesized MGI; 2444021]                                             |
| chr11 | 105,721,871 | + | CG | 0.0029 | 0.0035 | 0.330 | 33.373 | 0.513 | 51.309 | 0.114 | 11.427 | 2.287 | 0.172 | 17.210 | 2.442 | 0.163  | 16.366  | IC             | Open Sea | Interact 4/25  | Splice1 | ENM1JG51000000340 | chr11:10559805-1055924  | ENM1JG51000000333 | 4.973  | 3.620  | 0.361 | 0.642 | -1.374 | 0.0057 | 0.0065 | fat rat adipocyte protein 1 [Source MGI; Synthesized MGI; 2444021]                                             |
| chr11 | 105,815,389 | + | CG | 0.0100 | 0.0100 | 0.500 | 50.000 | 0.846 | 84.615 | 0.185 | 18.486 | 3.897 | 0.211 | 21.095 | 4.239 | 0.346  | 34.615  | ---            | Open Sea | Interact 8/25  | Splice1 | ENM1JG51000000340 | chr11:10559805-1055924  | ENM1JG51000000333 | 4.973  | 3.620  | 0.361 | 0.642 | -1.374 | 0.0057 | 0.0065 | fat rat adipocyte protein 1 [Source MGI; Synthesized MGI; 2444021]                                             |
| chr11 | 116,363,652 | + | CG | 0.0408 | 0.0037 | 0.759 | 75.862 | 0.583 | 58.333 | 0.347 | 34.714 | 4.143 | 0.268 | 26.845 | 4.148 | -0.15  | -17.535 | ---            | Open Sea | Interact 2/18  | Ref 107 | ENM1JG51000000340 | chr11:11636362-11641304 | ENM1JG51000000332 | 4.425  | 2.153  | 0.504 | 0.718 | -2.033 | 0.0036 | 0.0564 | ring finger protein 107 [Source MGI; Synthesized MGI; 2444046]                                                 |
| chr11 | 117,168,140 | + | CG | 0.0425 | 0.1029 | 0.640 | 64.000 | 0.367 | 36.687 | 0.362 | 36.247 | 5.149 | 0.276 | 27.624 | 5.125 | -0.273 | -27.333 | ---            | N: Shore | TSB: 1000      | RefSeq1 | ENM1JG51000000776 | chr11:11716812-11715732 | ENM1JG51000000187 | 0.516  | 2.447  | 0.246 | 0.800 | 4.744  | 0.0042 | 0.0062 | hazardous 1 RP repeat-containing 5 [Source MGI; Synthesized MGI; 1003071]                                      |
| chr12 | 3,424,350   | + | CG | 0.0408 | 0.0486 | 0.300 | 24.000 | 0.577 | 57.682 | 0.132 | 13.235 | 2.447 | 0.264 | 26.345 | 5.125 | 0.307  | 37.682  | ---            | Open Sea | Interact 1/11  | RefSeq1 | ENM1JG51000000746 | chr12:340888-3408180    | ENM1JG51000000125 | 6.504  | 4.580  | 0.795 | 0.277 | -1.376 | 0.0055 | 0.0066 | midkine-like protein 2, 11 [Source MGI; Synthesized MGI; 1003052]                                              |
| chr12 | 21,388,225  | + | CG | 0.0064 | 0.0063 | 0.550 | 55.000 | 0.786 | 78.571 | 0.319 | 31.862 | 4.372 | 0.138 | 13.899 | 2.162 | 0.227  | 22.680  | CA             | Open Sea | Interact 3/6   | Wedge   | ENM1JG51000000746 | chr12:340888-3408180    | ENM1JG51000000125 | 2.001  | 4.381  | 0.638 | 0.857 | 0.901  | 0.0023 | 0.0755 | lysozyme 3-mammalian type 1 cytoplasmic 5-mammalian isoform protein 1 [Source MGI; Synthesized MGI; 891986]    |
| chr12 | 21,435,221  | + | CG | 0.0046 | 0.0068 | 0.503 | 50.300 | 0.233 | 23.333 | 0.263 | 26.286 | 5.857 | 0.119 | 11.769 | 2.340 | -0.339 | -33.917 | TS             | Open Sea | Interact 2/6   | Wedge   | ENM1JG51000000746 | chr12:340888-3408180    | ENM1JG51000000125 | 2.001  | 4.381  | 0.638 | 0.857 | 0.901  | 0.0023 | 0.0755 | lysozyme 3-mammalian type 1 cytoplasmic 5-mammalian isoform protein 1 [Source MGI; Synthesized MGI; 891986]    |
| chr12 | 21,411,653  | + | CG | 0.0043 | 0.0037 | 0.162 | 16.216 | 0.500 | 50.000 | 0.401 | 40.064 | 8.013 | 0.289 | 28.714 | 5.155 | 0.338  | 33.784  | ---            | Open Sea | Interact 2/6   | Wedge   | ENM1JG51000000746 | chr12:340888-3408180    | ENM1JG51000000125 | 2.001  | 4.381  | 0.638 | 0.857 | 0.901  | 0.0023 | 0.0755 | lysozyme 3-mammalian type 1 cytoplasmic 5-mammalian isoform protein 1 [Source MGI; Synthesized MGI; 891986]    |
| chr12 | 50,357,852  | + | CG | 0.0449 | 0.0449 | 0.860 | 86.000 | 0.750 | 75.000 | 0.071 | 7.106  | 1.472 | 0.057 | 5.742  | 1.168 | -0.110 | -10.961 | CT             | Open Sea | Interact 17/18 | RefSeq1 | ENM1JG51000000340 | chr12:50343025-5034048  | ENM1JG51000000075 | 14.213 | 6.830  | 0.810 | 0.237 | -1.647 | 0.0041 | 0.0060 | protein kinase CH [Source MGI; Synthesized MGI; 198976]                                                        |
| chr12 | 50,347,863  | + | CG | 0.0476 | 0.0190 | 0.207 | 20.690 | 0.444 | 44.444 | 0.369 | 36.932 | 7.386 | 0.271 | 27.090 | 5.438 | 0.238  | 23.755  | TT             | Open Sea | Interact 1/18  | RefSeq1 | ENM1JG51000000340 | chr12:50343025-5034048  | ENM1JG51000000075 | 14.213 | 6.830  | 0.810 | 0.237 | -1.647 | 0.0041 | 0.0060 | protein kinase CH [Source MGI; Synthesized MGI; 198976]                                                        |
| chr12 | 50,327,421  | + | CG | 0.074  | 0.0552 | 0.800 | 80.000 | 0.458 | 45.833 | 0.212 | 21.189 | 4.238 | 0.265 | 26.553 | 5.101 | -0.342 | -34.107 | CA             | Open Sea | Interact 1/18  | RefSeq1 | ENM1JG51000000340 | chr12:50343025-5034048  | ENM1JG51000000075 | 14.213 | 6.830  | 0.810 | 0.237 | -1.647 | 0.0041 | 0.0060 | protein kinase CH [Source MGI; Synthesized MGI; 198976]                                                        |
| chr12 | 50,355,578  | + | CG | 0.0469 | 0.1021 | 0.871 | 87.087 | 0.687 | 68.687 | 0.138 | 13.833 | 2.747 | 0.138 | 13.819 | 2.744 | -0.345 | -34.430 | CA             | Open Sea | Interact 1/18  | RefSeq1 | ENM1JG51000000340 | chr12:50343025-5034048  | ENM1JG51000000075 | 14.213 | 6.830  | 0.810 | 0.237 | -1.647 | 0.0041 | 0.0060 | protein kinase CH [Source MGI; Synthesized MGI; 198976]                                                        |
| chr12 | 75,543,588  | + | CG | 0.074  | 0.0524 | 0.769 | 76.923 | 0.534 | 53.361 | 0.138 | 13.756 | 2.751 | 0.237 | 23.674 | 2.755 | -0.24  | -24.543 | RefSeq1        | Open Sea | Interact 1/18  | RefSeq1 | ENM1JG51000000340 | chr12:75543583-7554362  | ENM1JG51000000034 | 8.054  | 5.640  | 0.622 | 0.446 | -1.430 | 0.0021 | 0.0735 | platelet alpha granule containing 1 family G (44 kDa) of alpha member 3 [Source MGI; Synthesized MGI; 2288406] |
| chr12 | 113,012,524 | + | CG | 0.0089 | 0.0079 | 0.685 | 68.514 | 0.860 | 86.047 | 0.261 | 26.150 | 3.230 | 0.059 | 2.896  | 0.179 | 0.165  | 16.534  | ---            | Open Sea | Interact 1/23  | RefSeq1 | ENM1JG51000000441 | chr12:11301252-11301462 | ENM1JG51000000181 | 9.315  | 7.189  | 0.638 | 0.710 | -1.337 | 0.0057 | 0.0775 | phosphatidylethanolamine transferase protein 1 [Source MGI; Synthesized MGI; 1444048]                          |
| chr13 | 4,434,824   | + | CG | 0.0011 | 0.0011 | 0.539 | 53.941 | 0.830 | 83.019 | 0.231 | 23.136 | 4.027 | 0.196 | 19.627 | 3.475 | 0.301  | 30.719  | G:G            | Open Sea | TSB: 1000      | RefSeq1 | ENM1JG51000000441 | chr13:444716-4447168    | ENM1JG51000000038 | 0.943  | 4.418  | 0.625 | 0.131 | 5.904  | 0.0036 | 0.0069 | fibronectin type 1 domain 2 [Source MGI; Synthesized MGI; 3446048]                                             |
| chr13 | 9,438,638   | + | CG | 0.0083 | 0.0080 | 0.571 | 57.143 | 0.760 | 76.000 | 0.213 | 21.279 | 4.256 | 0.151 | 15.051 | 3.405 | 0.189  | 18.887  | ---            | Open Sea | Interact 2/36  | RefSeq1 | ENM1JG51000000441 | chr13:937602-9376028    | ENM1JG51000000052 | 5.181  | 4.025  | 0.419 | 0.489 | -1.387 | 0.0041 | 0.0060 | alpha 2-macroglobulin 2 [Source MGI; Synthesized MGI; 1007796]                                                 |
| chr13 | 14,068,661  | + | CG | 0.0043 | 0.0131 | 0.577 | 57.682 | 0.852 | 85.185 | 0.449 | 44.945 | 8.969 | 0.149 | 14.917 | 2.901 | 0.275  | 40.473  | TC             | Open Sea | Interact 3/3   | G:G:G   | ENM1JG51000000441 | chr13:14068661-1406868  | ENM1JG51000000057 | 8.114  | 7.185  | 0.439 | 0.387 | -1.132 | 0.0055 | 0.0066 | glyceraldehyde 3-phosphate dehydrogenase 1 [Source MGI; Synthesized MGI; 1341724]                              |
| chr13 | 23,186,781  | + | CG | 0.0086 | 0.0076 | 0.307 | 30.714 | 0.750 | 75.000 | 0.375 | 37.474 | 7.495 | 0.261 | 26.581 | 4.072 | 0.343  | 34.286  | CA             | Open Sea | Interact 3/10  | Splice1 | ENM1JG51000000340 | chr13:23186783-23       |                   |        |        |       |       |        |        |        |                                                                                                                |



|       |             |   |    |        |        |       |        |       |        |       |        |       |       |        |       |        |         |                |          |               |        |                    |                         |                    |         |         |        |        |        |        |        |                                                                                                      |
|-------|-------------|---|----|--------|--------|-------|--------|-------|--------|-------|--------|-------|-------|--------|-------|--------|---------|----------------|----------|---------------|--------|--------------------|-------------------------|--------------------|---------|---------|--------|--------|--------|--------|--------|------------------------------------------------------------------------------------------------------|
| chr14 | 86,111,488  | + | CG | 0.0020 | 0.0066 | 0.307 | 25.714 | 0.680 | 68.000 | 0.145 | 14.518 | 2.104 | 0.236 | 23.553 | 4.711 | 0.323  | 32.286  | CT             | Open Sea | Interon 1/10  | Chd17  | ENM1:JG:0000000000 | chr14:8776603-9048543   | ENM1:JG:0000000000 | 9.624   | 5.797   | 1.319  | 1.484  | -1.605 | 0.0020 | 0.0704 | dechlorhmd family transcription factor 1 [Source MGI; Synthesized AcGI: 1077090]                     |
| chr14 | 86,140,275  | + | CG | 0.0006 | 0.0008 | 0.265 | 26.500 | 0.519 | 51.802 | 0.178 | 17.833 | 3.141 | 0.182 | 19.219 | 3.844 | 0.253  | 25.289  | --             | Open Sea | Interon 1/10  | Chd17  | ENM1:JG:0000000000 | chr14:8776603-9048543   | ENM1:JG:0000000000 | 9.624   | 5.797   | 1.319  | 1.484  | -1.605 | 0.0020 | 0.0704 | dechlorhmd family transcription factor 1 [Source MGI; Synthesized AcGI: 1077090]                     |
| chr14 | 86,140,285  | + | CG | 0.0001 | 0.0000 | 0.250 | 25.000 | 0.459 | 45.763 | 0.167 | 16.733 | 3.147 | 0.136 | 13.584 | 2.119 | 0.268  | 26.763  | AA             | Open Sea | Interon 1/10  | Chd17  | ENM1:JG:0000000000 | chr14:8776603-9048543   | ENM1:JG:0000000000 | 9.624   | 5.797   | 1.319  | 1.484  | -1.605 | 0.0020 | 0.0704 | dechlorhmd family transcription factor 1 [Source MGI; Synthesized AcGI: 1077090]                     |
| chr14 | 86,140,323  | + | CG | 0.0468 | 0.0008 | 0.265 | 26.471 | 0.430 | 43.975 | 0.181 | 18.109 | 3.422 | 0.134 | 13.368 | 2.474 | 0.155  | 15.505  | GA             | Open Sea | Interon 1/10  | Chd17  | ENM1:JG:0000000000 | chr14:8776603-9048543   | ENM1:JG:0000000000 | 9.624   | 5.797   | 1.319  | 1.484  | -1.605 | 0.0020 | 0.0704 | dechlorhmd family transcription factor 1 [Source MGI; Synthesized AcGI: 1077090]                     |
| chr14 | 86,140,362  | + | CG | 0.0007 | 0.0087 | 0.750 | 75.000 | 0.917 | 91.667 | 0.365 | 36.515 | 7.303 | 0.065 | 6.500  | 1.300 | 0.207  | 21.667  | --             | Open Sea | Interon 1/10  | Chd17  | ENM1:JG:0000000000 | chr14:8776603-9048543   | ENM1:JG:0000000000 | 9.624   | 5.797   | 1.319  | 1.484  | -1.605 | 0.0020 | 0.0704 | dechlorhmd family transcription factor 1 [Source MGI; Synthesized AcGI: 1077090]                     |
| chr14 | 86,164,055  | + | CG | 0.0038 | 0.0047 | 0.903 | 90.300 | 0.768 | 76.636 | 0.044 | 4.436  | 0.884 | 0.082 | 8.192  | 1.436 | -0.127 | -1.687  | TS             | Open Sea | Interon 1/10  | Chd17  | ENM1:JG:0000000000 | chr14:8776603-9048543   | ENM1:JG:0000000000 | 9.624   | 5.797   | 1.319  | 1.484  | -1.605 | 0.0020 | 0.0704 | dechlorhmd family transcription factor 1 [Source MGI; Synthesized AcGI: 1077090]                     |
| chr14 | 120,476,668 | + | CG | 0.0000 | 0.0000 | 0.238 | 23.810 | 0.550 | 55.000 | 0.186 | 18.566 | 3.713 | 0.315 | 31.513 | 4.035 | 0.312  | 31.160  | CA             | N Shore  | TSS 3000      | Hsp90  | ENM1:JG:0000000000 | chr14:12046603-12057004 | ENM1:JG:0000000000 | 3.361   | 5.668   | 0.405  | 0.518  | 0.686  | 0.0001 | 0.0346 | W60-related protein 2a [Source MGI; Synthesized AcGI: 1078000]                                       |
| chr15 | 11,980,068  | + | CG | 0.0009 | 0.0002 | 0.807 | 80.734 | 0.915 | 91.939 | 0.147 | 14.730 | 2.146 | 0.041 | 4.084  | 0.817 | 0.188  | 19.775  | --             | Open Sea | Interon 3/3   | Sat1   | ENM1:JG:0000000000 | chr15:11980103-11990102 | ENM1:JG:0000000000 | 29.148  | 46.754  | 3.276  | 4.101  | 5.623  | 0.0001 | 0.0349 | SAR1 homolog 1 (S. cerevisiae) [Source MGI; Synthesized AcGI: 1080100]                               |
| chr15 | 12,288,841  | + | CG | 0.0022 | 0.0115 | 0.281 | 28.075 | 0.902 | 90.215 | 0.162 | 16.162 | 3.236 | 0.106 | 10.618 | 2.124 | 0.321  | 32.140  | --             | Open Sea | Interon 1/7   | Sat1   | ENM1:JG:0000000000 | chr15:12288003-12293006 | ENM1:JG:0000000000 | 330.121 | 173.342 | 16.816 | 60.276 | -1.196 | 0.0001 | 0.0624 | side-chain factor 30 (unc. transcript), member 8 [Source MGI; Synthesized AcGI: 2446800]             |
| chr15 | 12,320,441  | + | CG | 0.0110 | 0.0082 | 0.394 | 39.416 | 0.988 | 98.804 | 0.276 | 27.634 | 5.127 | 0.172 | 17.212 | 3.432 | 0.194  | 19.407  | --             | Open Sea | Interon 1/7   | Sat1   | ENM1:JG:0000000000 | chr15:12320003-12325006 | ENM1:JG:0000000000 | 330.121 | 173.342 | 16.816 | 60.276 | -1.196 | 0.0001 | 0.0624 | side-chain factor 30 (unc. transcript), member 8 [Source MGI; Synthesized AcGI: 2446800]             |
| chr15 | 12,374,792  | + | CG | 0.0070 | 0.0195 | 0.630 | 63.046 | 0.984 | 98.372 | 0.165 | 16.463 | 3.297 | 0.131 | 13.125 | 3.422 | 0.253  | 25.300  | --             | Open Sea | Interon 1/7   | Sat1   | ENM1:JG:0000000000 | chr15:12374003-12379006 | ENM1:JG:0000000000 | 330.121 | 173.342 | 16.816 | 60.276 | -1.196 | 0.0001 | 0.0624 | side-chain factor 30 (unc. transcript), member 8 [Source MGI; Synthesized AcGI: 2446800]             |
| chr15 | 12,324,968  | + | CG | 0.0123 | 0.1145 | 0.655 | 65.625 | 0.957 | 95.714 | 0.187 | 18.689 | 3.738 | 0.131 | 13.125 | 3.422 | 0.201  | 20.980  | --             | Open Sea | Interon 1/7   | Sat1   | ENM1:JG:0000000000 | chr15:12324003-12329006 | ENM1:JG:0000000000 | 330.121 | 173.342 | 16.816 | 60.276 | -1.196 | 0.0001 | 0.0624 | side-chain factor 30 (unc. transcript), member 8 [Source MGI; Synthesized AcGI: 2446800]             |
| chr15 | 17,620,382  | + | CG | 0.0047 | 0.2015 | 0.619 | 61.905 | 0.957 | 95.714 | 0.190 | 18.999 | 3.600 | 0.078 | 7.829  | 1.164 | 0.238  | 23.910  | --             | Open Sea | Interon 2/3   | Zfp2   | ENM1:JG:0000000000 | chr15:17620003-17625006 | ENM1:JG:0000000000 | 7.148   | 5.186   | 0.608  | 0.715  | -1.278 | 0.0017 | 0.0713 | zinc finger and homeobox 2 [Source MGI; Synthesized AcGI: 2688000]                                   |
| chr15 | 65,708,157  | + | CG | 0.0080 | 0.2007 | 0.667 | 66.667 | 0.854 | 85.417 | 0.185 | 18.472 | 3.694 | 0.071 | 7.130  | 1.424 | 0.188  | 18.760  | CA             | S Shore  | Interon 1/22  | Elf1a  | ENM1:JG:0000000000 | chr15:65708003-65713006 | ENM1:JG:0000000000 | 19.421  | 15.008  | 0.867  | 1.168  | -1.288 | 0.0002 | 0.0443 | EPF1 homolog 1 [Source MGI; Synthesized AcGI: 1029000]                                               |
| chr15 | 86,261,629  | + | CG | 0.0080 | 0.2731 | 0.438 | 43.750 | 0.763 | 76.210 | 0.175 | 17.515 | 3.103 | 0.152 | 15.162 | 3.022 | 0.366  | 35.560  | CA             | Open Sea | Interon 3/20  | Arf4   | ENM1:JG:0000000000 | chr15:86261003-86266006 | ENM1:JG:0000000000 | 8.084   | 6.965   | 0.501  | 0.283  | -1.158 | 0.0049 | 0.0945 | AT rich interactive domain 2 (ARID2) [Source MGI; Synthesized AcGI: 1034200]                         |
| chr15 | 86,213,654  | + | CG | 0.0478 | 0.0478 | 0.434 | 43.424 | 0.658 | 65.768 | 0.157 | 15.708 | 3.142 | 0.166 | 16.584 | 3.219 | 0.234  | 23.350  | --             | Open Sea | Interon 3/20  | Arf4   | ENM1:JG:0000000000 | chr15:86213003-86218006 | ENM1:JG:0000000000 | 8.084   | 6.965   | 0.501  | 0.283  | -1.158 | 0.0049 | 0.0945 | AT rich interactive domain 2 (ARID2) [Source MGI; Synthesized AcGI: 1034200]                         |
| chr15 | 86,457,382  | + | CG | 0.0342 | 0.0008 | 0.184 | 18.421 | 0.412 | 41.176 | 0.234 | 23.261 | 4.472 | 0.187 | 18.659 | 3.122 | 0.238  | 23.765  | AC             | N Shore  | Interon 1/14  | Stat1f | ENM1:JG:0000000000 | chr15:86457003-86458006 | ENM1:JG:0000000000 | 17.366  | 13.627  | 0.750  | 1.523  | -1.276 | 0.0009 | 0.0812 | SH-related CTD associated factor 11 [Source MGI; Synthesized AcGI: 1051940]                          |
| chr15 | 86,457,427  | + | CG | 0.0083 | 0.0008 | 0.314 | 31.275 | 0.559 | 55.922 | 0.321 | 32.088 | 4.438 | 0.140 | 13.969 | 2.794 | 0.246  | 24.560  | AC             | N Shore  | Interon 1/14  | Stat1f | ENM1:JG:0000000000 | chr15:86457003-86458006 | ENM1:JG:0000000000 | 17.366  | 13.627  | 0.750  | 1.523  | -1.276 | 0.0009 | 0.0812 | SH-related CTD associated factor 11 [Source MGI; Synthesized AcGI: 1051940]                          |
| chr15 | 86,458,227  | + | CG | 0.0778 | 0.0006 | 0.378 | 37.800 | 0.568 | 56.790 | 0.065 | 6.453  | 1.291 | 0.117 | 11.643 | 2.233 | 0.180  | 18.885  | CA             | N Shore  | Interon 1/14  | Stat1f | ENM1:JG:0000000000 | chr15:86458003-86459006 | ENM1:JG:0000000000 | 17.366  | 13.627  | 0.750  | 1.523  | -1.276 | 0.0009 | 0.0812 | SH-related CTD associated factor 11 [Source MGI; Synthesized AcGI: 1051940]                          |
| chr16 | 4,988,950   | + | CG | 0.0007 | 0.0085 | 0.716 | 71.640 | 0.868 | 86.765 | 0.154 | 15.436 | 3.087 | 0.086 | 8.448  | 1.730 | 0.151  | 15.123  | CG             | Open Sea | Downstream    | Orn1p  | ENM1:JG:0000000000 | chr16:49889003-49894006 | ENM1:JG:0000000000 | 1.947   | 1.022   | 0.259  | 0.239  | -1.807 | 0.0000 | 0.0818 | ORF binding protein [Source MGI; Synthesized AcGI: 1038000]                                          |
| chr16 | 4,118,914   | + | CG | 0.0474 | 0.0113 | 0.830 | 83.019 | 0.650 | 65.000 | 0.363 | 36.219 | 7.652 | 0.176 | 16.929 | 3.122 | -0.140 | -16.019 | Check manually | Open Sea | Interon 12/28 | Orn1p  | ENM1:JG:0000000000 | chr16:41189003-41194006 | ENM1:JG:0000000000 | 1.947   | 1.022   | 0.259  | 0.239  | -1.807 | 0.0000 | 0.0818 | ORF binding protein [Source MGI; Synthesized AcGI: 1038000]                                          |
| chr16 | 4,886,478   | + | CG | 0.0444 | 0.0001 | 0.480 | 48.000 | 0.140 | 14.286 | 0.359 | 35.891 | 7.138 | 0.167 | 16.701 | 3.340 | -0.327 | -33.774 | --             | Open Sea | Interon 1/16  | Mgfr1  | ENM1:JG:0000000000 | chr16:48864003-48869006 | ENM1:JG:0000000000 | 25.619  | 20.027  | 1.051  | 2.088  | -1.279 | 0.0019 | 0.0704 | multigene, ring finger 1 [Source MGI; Synthesized AcGI: 2447000]                                     |
| chr16 | 4,908,051   | + | CG | 0.0051 | 0.2107 | 0.797 | 79.601 | 0.580 | 58.929 | 0.084 | 8.389  | 1.678 | 0.068 | 6.409  | 1.638 | -0.207 | -20.720 | -G             | Open Sea | Interon 1/16  | Mgfr1  | ENM1:JG:0000000000 | chr16:49080003-49085006 | ENM1:JG:0000000000 | 25.619  | 20.027  | 1.051  | 2.088  | -1.279 | 0.0019 | 0.0704 | multigene, ring finger 1 [Source MGI; Synthesized AcGI: 2447000]                                     |
| chr16 | 10,713,485  | + | CG | 0.0272 | 0.0174 | 0.754 | 75.428 | 0.559 | 55.922 | 0.147 | 14.642 | 2.932 | 0.083 | 8.279  | 1.854 | -0.185 | -18.506 | CA             | Open Sea | Interon 21/22 | Orn1p  | ENM1:JG:0000000000 | chr16:10713003-10718006 | ENM1:JG:0000000000 | 4.988   | 4.043   | 0.259  | 0.239  | -1.234 | 0.0004 | 0.0604 | Cygnus acute domain factor 16, member 4 [Source MGI; Synthesized AcGI: 1027400]                      |
| chr16 | 23,248,879  | + | CG | 0.0006 | 0.0042 | 0.581 | 58.108 | 0.800 | 80.000 | 0.266 | 26.607 | 4.501 | 0.113 | 11.263 | 2.257 | 0.219  | 21.860  | --             | Open Sea | Interon 1/7   | Orn1p  | ENM1:JG:0000000000 | chr16:23248003-23253006 | ENM1:JG:0000000000 | 15.723  | 12.783  | 1.010  | 1.126  | -1.230 | 0.0006 | 0.0777 | long alpha-crystallin alpha 2 (B. taurus) [Source MGI; Synthesized AcGI: 1034700]                    |
| chr16 | 23,248,169  | + | CG | 0.0020 | 0.0080 | 0.556 | 55.556 | 0.811 | 81.081 | 0.262 | 26.253 | 5.411 | 0.175 | 17.460 | 3.432 | 0.255  | 25.558  | --             | Open Sea | Interon 5/7   | Orn1p  | ENM1:JG:0000000000 | chr16:23248003-23253006 | ENM1:JG:0000000000 | 15.723  | 12.783  | 1.010  | 1.126  | -1.230 | 0.0006 | 0.0777 | long alpha-crystallin alpha 2 (B. taurus) [Source MGI; Synthesized AcGI: 1034700]                    |
| chr16 | 24,452,557  | + | CG | 0.0007 | 0.0007 | 0.680 | 68.000 | 0.887 | 88.679 | 0.123 | 12.338 | 2.448 | 0.085 | 8.350  | 2.402 | 0.257  | 25.679  | --             | Open Sea | Interon 3/16  | Plzf1a | ENM1:JG:0000000000 | chr16:24452003-24457006 | ENM1:JG:0000000000 | 14.419  | 11.215  | 0.420  | 0.880  | -1.286 | 0.0000 | 0.0307 | phosphatase 10-related protein 1, choline, white, rat [Source MGI; Synthesized AcGI: 1080500]        |
| chr16 | 24,371,083  | + | CG | 0.0006 | 0.0018 | 0.887 | 88.744 | 0.633 | 63.333 | 0.054 | 5.438  | 1.088 | 0.289 | 28.884 | 5.777 | -0.204 | -20.440 | TA             | Open Sea | Interon 6/13  | Sat1   | ENM1:JG:0000000000 | chr16:24371003-24376006 | ENM1:JG:0000000000 | 22.541  | 27.680  | 1.450  | 1.838  | 1.223  | 0.0001 | 0.0885 | sorting nexin 4 [Source MGI; Synthesized AcGI: 1056000]                                              |
| chr16 | 35,146,646  | + | CG | 0.0030 | 0.0030 | 0.719 | 71.910 | 0.522 | 52.214 | 0.146 | 14.629 | 2.936 | 0.185 | 18.450 | 3.488 | -0.167 | -16.736 | Check manually | Open Sea | Interon 1/20  | Arf4   | ENM1:JG:0000000000 | chr16:35146003-35151006 | ENM1:JG:0000000000 | 0.933   | 1.121   | 0.115  | 0.134  | 1.930  | 0.0001 | 0.0885 | adenosine cyclase 5 [Source MGI; Synthesized AcGI: 1080700]                                          |
| chr16 | 44,461,158  | + | CG | 0.0047 | 0.0015 | 0.136 | 13.614 | 0.378 | 37.658 | 0.401 | 40.093 | 8.019 | 0.176 | 17.182 | 3.154 | 0.240  | 24.354  | --             | Open Sea | Interon 1/14  | Arf4   | ENM1:JG:0000000000 | chr16:44461003-44466006 | ENM1:JG:0000000000 | 30.382  | 24.851  | 0.839  | 2.483  | -1.238 | 0.0045 | 0.0916 | ATPase, Na <sup>+</sup> /transferring, isoform V1, isoform 1 [Source MGI; Synthesized AcGI: 1030700] |
| chr16 | 73,927,201  | + | CG | 0.0001 | 0.0001 | 0.680 | 68.019 | 0.836 | 83.592 | 0.087 | 8.643  | 1.933 | 0.091 | 8.019  | 1.814 | 0.155  | 15.520  | CT             | Open Sea | Interon 21/25 | Raf1a  | ENM1:JG:0000000000 | chr16:73927003-73932006 | ENM1:JG:0000000000 | 16.487  | 7.782   | 0.889  | 2.480  | -2.119 | 0.0046 | 0.0944 | roundabout guidance receptor 2 [Source MGI; Synthesized AcGI: 1080100]                               |
| chr16 | 73,927,201  | + | CG | 0.0001 | 0.0001 | 0.680 | 68.041 | 0.836 | 83.592 | 0.087 | 8.643  | 1.933 | 0.091 |        |       |        |         |                |          |               |        |                    |                         |                    |         |         |        |        |        |        |        |                                                                                                      |



|       |             |   |    |        |        |       |        |       |        |       |        |       |       |        |       |        |         |                |             |               |                     |                           |                         |                     |        |        |       |        |        |        |                                                            |                                                                                    |
|-------|-------------|---|----|--------|--------|-------|--------|-------|--------|-------|--------|-------|-------|--------|-------|--------|---------|----------------|-------------|---------------|---------------------|---------------------------|-------------------------|---------------------|--------|--------|-------|--------|--------|--------|------------------------------------------------------------|------------------------------------------------------------------------------------|
| chr19 | 57,681,755  | + | CG | 0.0018 | 0.0014 | 0.788 | 76.768 | 0.570 | 57.000 | 0.127 | 12.743 | 2.149 | 0.000 | 5.967  | 1.173 | -0.218 | -21.768 | --             | Open Sea    | Interon 12/28 | Atv1b               | ENM1JG5:ENM00054643       | chr19:57611033-58133338 | ENM1JG5:ENM00077582 | 6.443  | 4.802  | 0.194 | 0.505  | -1.317 | 0.0022 | 0.0705                                                     | atv1b-ncs-ncs-1 [Source MGI: Symbol Acc: MGI:2147496]                              |
| chr19 | 57,687,450  | + | CG | 0.0178 | 0.0254 | 0.538 | 53.846 | 0.833 | 83.333 | 0.287 | 28.485 | 5.107 | 0.187 | 18.484 | 3.139 | 0.265  | 26.487  | AC             | N-Shd       | Interon 12/28 | Atv1b               | ENM1JG5:ENM00054643       | chr19:57611033-58133338 | ENM1JG5:ENM00077582 | 6.443  | 4.802  | 0.194 | 0.505  | -1.317 | 0.0022 | 0.0705                                                     | atv1b-ncs-ncs-1 [Source MGI: Symbol Acc: MGI:2147496]                              |
| chr19 | 57,708,040  | + | CG | 0.0022 | 0.0102 | 0.847 | 84.766 | 0.647 | 64.766 | 0.105 | 10.534 | 3.107 | 0.160 | 16.014 | 3.203 | -0.200 | -20.240 | --             | Open Sea    | Interon 12/28 | Atv1b               | ENM1JG5:ENM00054643       | chr19:57611033-58133338 | ENM1JG5:ENM00077582 | 6.443  | 4.802  | 0.194 | 0.505  | -1.317 | 0.0022 | 0.0705                                                     | atv1b-ncs-ncs-1 [Source MGI: Symbol Acc: MGI:2147496]                              |
| chr19 | 57,731,288  | + | CG | 0.0117 | 0.0700 | 0.240 | 24.000 | 0.679 | 67.807 | 0.382 | 38.225 | 7.447 | 0.324 | 32.434 | 4.447 | 0.438  | 43.857  | TA             | Open Sea    | Interon 27/28 | Atv1b               | ENM1JG5:ENM00054643       | chr19:57611033-58133338 | ENM1JG5:ENM00077582 | 6.443  | 4.802  | 0.194 | 0.505  | -1.317 | 0.0022 | 0.0705                                                     | atv1b-ncs-ncs-1 [Source MGI: Symbol Acc: MGI:2147496]                              |
| chr19 | 58,002,180  | + | CG | 0.0081 | 0.0630 | 0.768 | 76.768 | 0.585 | 58.537 | 0.268 | 26.580 | 4.116 | 0.291 | 29.173 | 4.415 | -0.182 | -18.240 | --             | Open Sea    | Interon 27/28 | Atv1b               | ENM1JG5:ENM00054643       | chr19:57611033-58133338 | ENM1JG5:ENM00077582 | 6.443  | 4.802  | 0.194 | 0.505  | -1.317 | 0.0022 | 0.0705                                                     | atv1b-ncs-ncs-1 [Source MGI: Symbol Acc: MGI:2147496]                              |
| chr19 | 60,877,624  | + | CG | 0.0046 | 0.0088 | 0.559 | 55.880 | 0.875 | 87.500 | 0.112 | 11.180 | 2.236 | 0.110 | 11.489 | 2.294 | 0.246  | 24.918  | --             | Open Sea    | Interon 1/15  | Gt10b               | ENM1JG5:ENM00003233       | chr19:60884918-6100353  | ENM1JG5:ENM00003233 | 12.009 | 7.302  | 1.021 | 2.164  | -1.754 | 0.0027 | 0.0705                                                     | Gt10b-coiled-coiled receptor domain 5 [Source MGI: Symbol Acc: MGI:108916]         |
| chr2  | 11,766,558  | + | CG | 0.0008 | 0.0070 | 0.413 | 41.304 | 0.802 | 80.217 | 0.104 | 10.383 | 2.077 | 0.100 | 10.882 | 2.136 | 0.238  | 23.918  | --             | Open Sea    | Interon 2/20  | Flav1b              | ENM1JG5:ENM00000882       | chr2:1176251-11777582   | ENM1JG5:ENM00000882 | 15.007 | 14.160 | 0.483 | 0.483  | -1.100 | 0.0000 | 0.0007                                                     | Flav1b domain 18 [Source MGI: Symbol Acc: MGI:1054068]                             |
| chr2  | 18,276,967  | + | CG | 0.0004 | 0.0488 | 0.189 | 18.808 | 0.915 | 91.515 | 0.130 | 13.168 | 2.394 | 0.081 | 8.097  | 1.479 | 0.336  | 33.847  | --             | Open Sea    | Interon 1/11  | Chn1f               | ENM1JG5:ENM00000840       | chr2:1827316-18288303   | ENM1JG5:ENM00000840 | 9.505  | 9.140  | 0.617 | 0.846  | 1.104  | 0.0048 | 0.0041                                                     | Chn1b-ncs-ncs-ncs-1 [Source MGI: Symbol Acc: MGI:1053888]                          |
| chr2  | 18,348,201  | + | CG | 0.0004 | 0.0070 | 0.859 | 85.857 | 0.444 | 44.444 | 0.261 | 26.049 | 4.014 | 0.275 | 27.479 | 5.416 | -0.384 | -38.413 | TS             | Open Sea    | Interon 1/11  | Chn1f               | ENM1JG5:ENM00000840       | chr2:1827316-18288303   | ENM1JG5:ENM00000840 | 9.505  | 9.140  | 0.617 | 0.846  | 1.104  | 0.0048 | 0.0041                                                     | Chn1b-ncs-ncs-ncs-1 [Source MGI: Symbol Acc: MGI:1053888]                          |
| chr2  | 20,788,322  | + | CG | 0.0004 | 0.0006 | 0.340 | 33.962 | 0.544 | 54.366 | 0.175 | 17.491 | 3.498 | 0.079 | 7.939  | 1.188 | 0.204  | 20.404  | --             | Open Sea    | Interon 4/12  | Shb                 | ENM1JG5:ENM00000817       | chr2:2077570-20810054   | ENM1JG5:ENM00000817 | 5.009  | 3.794  | 0.268 | 0.730  | -1.482 | 0.0002 | 0.0006                                                     | Shb-ncs-ncs-ncs-1 [Source MGI: Symbol Acc: MGI:1054564]                            |
| chr2  | 23,579,450  | + | CG | 0.0020 | 0.0031 | 0.808 | 80.769 | 0.507 | 50.877 | 0.162 | 16.225 | 3.245 | 0.207 | 20.495 | 4.139 | -0.208 | -20.820 | GA             | Open Sea    | Interon 2/27  | Lov1b               | ENM1JG5:ENM00000882       | chr2:2358064-23640511   | ENM1JG5:ENM00000882 | 2.300  | 2.319  | 0.170 | 0.279  | -1.004 | 0.0002 | 0.0002                                                     | L10M nonmuscle 1 transmembrane factor 1 beta [Source MGI: Symbol Acc: MGI:1100010] |
| chr2  | 23,579,450  | + | CG | 0.0019 | 0.0031 | 0.750 | 75.000 | 0.403 | 40.308 | 0.144 | 14.434 | 2.887 | 0.050 | 5.008  | 1.052 | -0.327 | -32.882 | AA             | Open Sea    | Interon 2/27  | Lov1b               | ENM1JG5:ENM00000882       | chr2:2358064-23640511   | ENM1JG5:ENM00000882 | 2.300  | 2.319  | 0.170 | 0.279  | -1.004 | 0.0002 | 0.0002                                                     | L10M nonmuscle 1 transmembrane factor 1 beta [Source MGI: Symbol Acc: MGI:1100010] |
| chr2  | 48,862,710  | + | CG | 0.0043 | 0.1137 | 0.519 | 51.802 | 0.207 | 20.714 | 0.285 | 28.522 | 5.104 | 0.142 | 14.164 | 2.639 | -0.301 | -30.138 | CC             | S-Share     | Interon 1/10  | Shb                 | ENM1JG5:ENM00000882       | chr2:48862162-48870150  | ENM1JG5:ENM00000882 | 3.940  | 11.780 | 1.280 | 1.420  | 2.891  | 0.0000 | 0.0007                                                     | Shb-ncs-ncs-ncs-1 [Source MGI: Symbol Acc: MGI:108402]                             |
| chr2  | 70,588,314  | + | CG | 0.0167 | 0.1192 | 0.600 | 60.000 | 0.875 | 87.500 | 0.364 | 36.398 | 4.080 | 0.085 | 8.539  | 1.108 | 0.275  | 27.500  | Check manually | Open Sea    | Interon 10/16 | Gat1f               | ENM1JG5:ENM00000780       | chr2:7058814-70602014   | ENM1JG5:ENM00000780 | 9.100  | 3.008  | 1.244 | 1.844  | -2.982 | 0.0005 | 0.0009                                                     | Gat1b-ncs-ncs-ncs-1 [Source MGI: Symbol Acc: MGI:108002]                           |
| chr2  | 70,588,314  | + | CG | 0.0167 | 0.1192 | 0.600 | 60.000 | 0.875 | 87.500 | 0.364 | 36.398 | 4.080 | 0.085 | 8.539  | 1.108 | 0.275  | 27.500  | Check manually | Open Sea    | Interon 10/16 | Gat1f               | ENM1JG5:ENM00000780       | chr2:7058814-70602014   | ENM1JG5:ENM00000780 | 9.100  | 3.008  | 1.244 | 1.844  | -2.982 | 0.0005 | 0.0009                                                     | Gat1b-ncs-ncs-ncs-1 [Source MGI: Symbol Acc: MGI:108002]                           |
| chr2  | 71,214,617  | + | CG | 0.0449 | 0.2541 | 0.816 | 81.623 | 0.610 | 60.976 | 0.176 | 17.578 | 3.136 | 0.140 | 13.958 | 2.782 | -0.207 | -20.857 | --             | S-Shd       | Interon 2/16  | Gat1f               | ENM1JG5:ENM00000780       | chr2:7121462-71230338   | ENM1JG5:ENM00000780 | 12.045 | 8.805  | 1.117 | 1.881  | -1.477 | 0.0042 | 0.0007                                                     | Gat1b-ncs-ncs-ncs-1 [Source MGI: Symbol Acc: MGI:107702]                           |
| chr2  | 71,303,967  | + | CG | 0.0219 | 0.2555 | 0.656 | 65.625 | 0.367 | 36.867 | 0.189 | 19.104 | 3.187 | 0.116 | 11.443 | 2.329 | -0.280 | -28.958 | CA             | Open Sea    | Downstream    | Flav1b              | ENM1JG5:ENM00000644       | chr2:7130397-71303983   | ENM1JG5:ENM00000644 | 1.859  | 2.400  | 0.263 | 0.101  | 3.301  | 0.0004 | 0.0000                                                     | Flav1b-ncs-ncs-ncs-1 [Source MGI: Symbol Acc: MGI:1080116]                         |
| chr2  | 82,241,470  | + | CG | 0.0040 | 0.0548 | 0.818 | 81.818 | 0.381 | 38.085 | 0.084 | 8.399  | 1.880 | 0.253 | 25.216 | 5.055 | -0.437 | -43.723 | fg             | Open Sea    | Interon 6/17  | Flav1b              | ENM1JG5:ENM00000644       | chr2:8224147-82241483   | ENM1JG5:ENM00000644 | 2.447  | 3.000  | 0.315 | 0.473  | -1.408 | 0.0009 | 0.0000                                                     | Flav1b-ncs-ncs-ncs-1 [Source MGI: Symbol Acc: MGI:1084702]                         |
| chr2  | 82,360,967  | + | CG | 0.0044 | 0.7587 | 0.833 | 83.333 | 0.632 | 63.158 | 0.105 | 10.534 | 3.107 | 0.146 | 14.164 | 2.689 | -0.302 | -30.175 | AG             | Open Sea    | Downstream    | Flav1b              | ENM1JG5:ENM00000644       | chr2:8236097-82360983   | ENM1JG5:ENM00000644 | 2.447  | 3.000  | 0.315 | 0.473  | -1.408 | 0.0009 | 0.0000                                                     | Flav1b-ncs-ncs-ncs-1 [Source MGI: Symbol Acc: MGI:1084702]                         |
| chr2  | 105,561,366 | + | CG | 0.0274 | 0.0883 | 0.702 | 70.213 | 0.488 | 48.888 | 0.180 | 18.042 | 3.608 | 0.081 | 8.097  | 1.439 | -0.213 | -21.334 | --             | Interon 3/3 | Flav1b        | ENM1JG5:ENM00000644 | chr2:105561366-1055613703 | ENM1JG5:ENM00000644     | 5.068               | 4.146  | 0.648  | 0.543 | -1.387 | 0.0014 | 0.0000 | Flav1b-ncs-ncs-ncs-1 [Source MGI: Symbol Acc: MGI:1080002] |                                                                                    |
| chr2  | 105,561,366 | + | CG | 0.0274 | 0.0883 | 0.702 | 70.213 | 0.488 | 48.888 | 0.180 | 18.042 | 3.608 | 0.081 | 8.097  | 1.439 | -0.213 | -21.334 | --             | Interon 3/3 | Flav1b        | ENM1JG5:ENM00000644 | chr2:105561366-1055613703 | ENM1JG5:ENM00000644     | 5.068               | 4.146  | 0.648  | 0.543 | -1.387 | 0.0014 | 0.0000 | Flav1b-ncs-ncs-ncs-1 [Source MGI: Symbol Acc: MGI:1080002] |                                                                                    |
| chr2  | 105,561,366 | + | CG | 0.0274 | 0.0883 | 0.702 | 70.213 | 0.488 | 48.888 | 0.180 | 18.042 | 3.608 | 0.081 | 8.097  | 1.439 | -0.213 | -21.334 | --             | Interon 3/3 | Flav1b        | ENM1JG5:ENM00000644 | chr2:105561366-1055613703 | ENM1JG5:ENM00000644     | 5.068               | 4.146  | 0.648  | 0.543 | -1.387 | 0.0014 | 0.0000 | Flav1b-ncs-ncs-ncs-1 [Source MGI: Symbol Acc: MGI:1080002] |                                                                                    |
| chr2  | 105,561,366 | + | CG | 0.0274 | 0.0883 | 0.702 | 70.213 | 0.488 | 48.888 | 0.180 | 18.042 | 3.608 | 0.081 | 8.097  | 1.439 | -0.213 | -21.334 | --             | Interon 3/3 | Flav1b        | ENM1JG5:ENM00000644 | chr2:105561366-1055613703 | ENM1JG5:ENM00000644     | 5.068               | 4.146  | 0.648  | 0.543 | -1.387 | 0.0014 | 0.0000 | Flav1b-ncs-ncs-ncs-1 [Source MGI: Symbol Acc: MGI:1080002] |                                                                                    |
| chr2  | 105,561,366 | + | CG | 0.0274 | 0.0883 | 0.702 | 70.213 | 0.488 | 48.888 | 0.180 | 18.042 | 3.608 | 0.081 | 8.097  | 1.439 | -0.213 | -21.334 | --             | Interon 3/3 | Flav1b        | ENM1JG5:ENM00000644 | chr2:105561366-1055613703 | ENM1JG5:ENM00000644     | 5.068               | 4.146  | 0.648  | 0.543 | -1.387 | 0.0014 | 0.0000 | Flav1b-ncs-ncs-ncs-1 [Source MGI: Symbol Acc: MGI:1080002] |                                                                                    |
| chr2  | 105,561,366 | + | CG | 0.0274 | 0.0883 | 0.702 | 70.213 | 0.488 | 48.888 | 0.180 | 18.042 | 3.608 | 0.081 | 8.097  | 1.439 | -0.213 | -21.334 | --             | Interon 3/3 | Flav1b        | ENM1JG5:ENM00000644 | chr2:105561366-1055613703 | ENM1JG5:ENM00000644     | 5.068               | 4.146  | 0.648  | 0.543 | -1.387 | 0.0014 | 0.0000 | Flav1b-ncs-ncs-ncs-1 [Source MGI: Symbol Acc: MGI:1080002] |                                                                                    |
| chr2  | 105,561,366 | + | CG | 0.0274 | 0.0883 | 0.702 | 70.213 | 0.488 | 48.888 | 0.180 | 18.042 | 3.608 | 0.081 | 8.097  | 1.439 | -0.213 | -21.334 | --             | Interon 3/3 | Flav1b        | ENM1JG5:ENM00000644 | chr2:105561366-1055613703 | ENM1JG5:ENM00000644     | 5.068               | 4.146  | 0.648  | 0.543 | -1.387 | 0.0014 | 0.0000 | Flav1b-ncs-ncs-ncs-1 [Source MGI: Symbol Acc: MGI:1080002] |                                                                                    |
| chr2  | 105,561,366 | + | CG | 0.0274 | 0.0883 | 0.702 | 70.213 | 0.488 | 48.888 | 0.180 | 18.042 | 3.608 | 0.081 | 8.097  | 1.439 | -0.213 | -21.334 | --             | Interon 3/3 | Flav1b        | ENM1JG5:ENM00000644 | chr2:105561366-1055613703 | ENM1JG5:ENM00000644     | 5.068               | 4.146  | 0.648  | 0.543 | -1.387 | 0.0014 | 0.0000 | Flav1b-ncs-ncs-ncs-1 [Source MGI: Symbol Acc: MGI:1080002] |                                                                                    |
| chr2  | 105,561,366 | + | CG | 0.0274 | 0.0883 | 0.702 | 70.213 | 0.488 | 48.888 | 0.180 | 18.042 | 3.608 | 0.081 | 8.097  | 1.439 | -0.213 | -21.334 | --             | Interon 3/3 | Flav1b        | ENM1JG5:ENM00000644 | chr2:105561366-1055613703 | ENM1JG5:ENM00000644     | 5.068               | 4.146  | 0.648  | 0.543 | -1.387 | 0.0014 | 0.0000 | Flav1b-ncs-ncs-ncs-1 [Source MGI: Symbol Acc: MGI:1080002] |                                                                                    |
| chr2  | 105,561,366 | + | CG | 0.0274 | 0.0883 | 0.702 | 70.213 | 0.488 | 48.888 | 0.180 | 18.042 | 3.608 | 0.081 | 8.097  | 1.439 | -0.213 | -21.334 | --             | Interon 3/3 | Flav1b        | ENM1JG5:ENM00000644 | chr2:105561366-1055613703 | ENM1JG5:ENM00000644     | 5.068               | 4.146  | 0.648  | 0.543 | -1.387 | 0.0014 | 0.0000 | Flav1b-ncs-ncs-ncs-1 [Source MGI: Symbol Acc: MGI:1080002] |                                                                                    |
| chr2  | 105,561,366 | + | CG | 0.0274 | 0.0883 | 0.702 | 70.213 | 0.488 | 48.888 | 0.180 | 18.042 | 3.608 | 0.081 | 8.097  | 1.439 | -0.213 | -21.334 | --             | Interon 3/3 | Flav1b        | ENM1JG5:ENM00000644 | chr2:105561366-1055613703 | ENM1JG5:ENM00000644     | 5.068               | 4.146  | 0.648  | 0.543 | -1.387 | 0.0014 | 0.0000 | Flav1b-ncs-ncs-ncs-1 [Source MGI: Symbol Acc: MGI:1080002] |                                                                                    |
| chr2  | 105,561,366 | + | CG | 0.0274 | 0.0883 | 0.702 | 70.213 | 0.488 | 48.888 | 0.180 | 18.042 | 3.608 | 0.081 | 8.097  | 1.439 | -0.213 | -21.334 | --             | Interon 3/3 | Flav1b        | ENM1JG5:ENM00000644 | chr2:105561366-1055613703 | ENM1JG5:ENM00000644     | 5.068               | 4.146  | 0.648  | 0.543 | -1.387 | 0.0014 | 0.0000 | Flav1b-ncs-ncs-ncs-1 [Source MGI: Symbol Acc: MGI:1080002] |                                                                                    |
| chr2  | 105,561,366 | + | CG | 0.0274 | 0.0883 | 0.702 | 70.213 | 0.488 | 48.888 | 0.180 | 18.042 | 3.608 | 0.081 | 8.097  |       |        |         |                |             |               |                     |                           |                         |                     |        |        |       |        |        |        |                                                            |                                                                                    |



|      |             |   |     |        |        |       |        |       |        |       |        |       |       |        |       |        |         |                |          |               |        |                  |                      |                  |        |        |       |       |        |        |                                                                               |                                                                                          |
|------|-------------|---|-----|--------|--------|-------|--------|-------|--------|-------|--------|-------|-------|--------|-------|--------|---------|----------------|----------|---------------|--------|------------------|----------------------|------------------|--------|--------|-------|-------|--------|--------|-------------------------------------------------------------------------------|------------------------------------------------------------------------------------------|
| chv5 | 65.586.480  | + | QCS | 0.0309 | 0.0081 | 0.889 | 88.889 | 0.077 | 67.742 | 0.168 | 10.630 | 2.124 | 0.087 | 8.402  | 1.738 | -0.211 | -21.147 | CT             | Open Sea | Interon 2/5   | Uchv5  | DBM1JG5000000000 | chv5.0002320-0000148 | DBM1JG5000000001 | 11.156 | 18.124 | 1.823 | 1.929 | 1.625  | 0.0004 | 0.0482                                                                        | ultra-hi-conjugating enzyme E2H (1 Source MG1   Symbol Acc: MG1-185824)                  |
| chv5 | 67.621.051  | + | QCS | 0.0400 | 0.0076 | 0.884 | 88.372 | 0.703 | 70.270 | 0.084 | 8.367  | 1.473 | 0.237 | 21.731 | 4.346 | -0.181 | -18.162 | CS: nearby     | Open Sea | JUR1          | Alphv5 | DBM1JG5000000706 | chv5.0706126-0704730 | DBM1JG5000000000 | 4.962  | 2.988  | 0.526 | 0.613 | -1.526 | 0.0006 | 0.0777                                                                        | ATthm, unsequenced phage (1 Source MG1   Symbol Acc: MG1-133848)                         |
| chv5 | 67.621.988  | + | QCS | 0.0305 | 0.0076 | 0.833 | 83.333 | 0.618 | 61.785 | 0.117 | 11.682 | 2.136 | 0.130 | 13.916 | 2.783 | -0.216 | -21.588 | CS: nearby     | Open Sea | JUR1          | Alphv5 | DBM1JG5000000706 | chv5.0706126-0704730 | DBM1JG5000000000 | 4.962  | 2.988  | 0.526 | 0.613 | -1.526 | 0.0006 | 0.0777                                                                        | ATthm, unsequenced phage (1 Source MG1   Symbol Acc: MG1-133848)                         |
| chv5 | 70.054.171  | + | QCS | 0.0056 | 0.0076 | 0.641 | 64.100 | 0.841 | 84.041 | 0.246 | 23.585 | 4.317 | 0.110 | 11.875 | 2.173 | 0.260  | 19.988  | Check manually | Open Sea | Interon 10/28 | ADP    | DBM1JG5000000000 | chv5.0000000-7000048 | DBM1JG5000000006 | 47.288 | 24.522 | 3.917 | 5.879 | -1.389 | 0.0004 | 0.0004                                                                        | transmembrane domain protein receptor (1 Source MG1   Symbol Acc: MG1-186862)            |
| chv5 | 70.054.775  | + | QCS | 0.0176 | 0.1343 | 0.716 | 71.642 | 0.477 | 47.602 | 0.176 | 17.054 | 3.117 | 0.143 | 14.241 | 2.858 | -0.239 | -23.948 | fg             | Open Sea | Interon 12/24 | ADP    | DBM1JG5000000000 | chv5.0000000-7000048 | DBM1JG5000000006 | 8.585  | 6.688  | 0.708 | 0.519 | -1.284 | 0.0016 | 0.0016                                                                        | crystallin domain of nucleol. cytosol. ligand (1 Source MG1   Symbol Acc: MG1-186862)    |
| chv5 | 70.074.628  | + | QCS | 0.0040 | 0.0060 | 0.480 | 48.038 | 0.688 | 68.038 | 0.248 | 24.808 | 4.462 | 0.084 | 8.370  | 1.474 | 0.276  | 21.980  | --             | N Shore  | Interon 2/22  | Chv5   | DBM1JG5000000000 | chv5.0000000-7000048 | DBM1JG5000000006 | 8.585  | 6.688  | 0.708 | 0.519 | -1.284 | 0.0016 | 0.0016                                                                        | crystallin domain of nucleol. cytosol. ligand (1 Source MG1   Symbol Acc: MG1-186862)    |
| chv5 | 87.588.185  | + | QCS | 0.0066 | 0.0066 | 0.288 | 28.830 | 0.576 | 57.576 | 0.188 | 18.913 | 3.183 | 0.270 | 27.027 | 5.405 | 0.279  | 27.948  | TA             | Open Sea | TBS 0000      | Shv1   | DBM1JG5000000007 | chv5.0000000-8700048 | DBM1JG5000000004 | 17.034 | 10.670 | 1.388 | 2.313 | -1.071 | 0.0049 | 0.0081                                                                        | tail of coat of virus family D2, member 1 (1 Source MG1   Symbol Acc: MG1-186862)        |
| chv5 | 88.507.405  | + | QCS | 0.0084 | 0.1144 | 0.682 | 68.201 | 0.881 | 88.136 | 0.238 | 23.858 | 4.772 | 0.083 | 8.365  | 1.453 | 0.180  | 18.905  | --             | S Shore  | TBS 0000      | Shv1   | DBM1JG5000000006 | chv5.0000000-8800048 | DBM1JG5000000007 | 53.104 | 65.564 | 2.541 | 4.382 | 1.225  | 0.0012 | 0.0047                                                                        | transmembrane domain protein receptor (1 Source MG1   Symbol Acc: MG1-186862)            |
| chv5 | 100.080.720 | + | QCS | 0.0000 | 0.0000 | 0.550 | 55.000 | 0.808 | 80.769 | 0.315 | 31.054 | 4.301 | 0.213 | 21.364 | 4.253 | 0.308  | 30.780  | CT             | Open Sea | Interon 10/24 | Shv1   | DBM1JG5000000006 | chv5.0000000-1000048 | DBM1JG5000000007 | 6.122  | 3.508  | 0.768 | 1.746 | 0.0002 | 0.0047 | transmembrane domain protein receptor (1 Source MG1   Symbol Acc: MG1-186862) |                                                                                          |
| chv5 | 100.076.100 | + | QCS | 0.0000 | 0.0002 | 0.360 | 36.059 | 0.553 | 55.263 | 0.319 | 31.031 | 4.386 | 0.123 | 12.330 | 2.466 | 0.187  | 18.744  | CS             | Open Sea | Interon 16/14 | Shv1   | DBM1JG5000000006 | chv5.0000000-1000048 | DBM1JG5000000007 | 12.806 | 4.038  | 0.792 | 1.886 | -3.172 | 0.0006 | 0.0005                                                                        | Shv1 homolog A15, unsequenced (1 Source MG1   Symbol Acc: MG1-186862)                    |
| chv5 | 107.784.303 | + | QCS | 0.0466 | 0.0776 | 0.667 | 66.667 | 0.861 | 86.111 | 0.256 | 25.555 | 5.111 | 0.123 | 12.342 | 2.468 | 0.184  | 18.456  | --             | Open Sea | Interon 1/2   | ADP    | DBM1JG5000000000 | chv5.0000000-1070048 | DBM1JG5000000006 | 9.151  | 7.740  | 0.560 | 0.620 | -1.181 | 0.0048 | 0.0041                                                                        | tail of coat of virus family D2, member 1 (1 Source MG1   Symbol Acc: MG1-186862)        |
| chv5 | 110.126.688 | + | QCS | 0.0186 | 0.4330 | 0.176 | 17.647 | 0.340 | 34.040 | 0.159 | 15.919 | 3.184 | 0.106 | 10.639 | 2.128 | 0.164  | 16.385  | CS             | S Shore  | Interon 2/17  | Chv5   | DBM1JG5000000488 | chv5.0000000-1100048 | DBM1JG5000000009 | 6.408  | 7.528  | 0.373 | 0.385 | 1.175  | 0.0016 | 0.0008                                                                        | checkpoints with forward and ring finger domains (1 Source MG1   Symbol Acc: MG1-186862) |
| chv5 | 111.028.572 | + | QCS | 0.0006 | 0.0008 | 0.872 | 87.179 | 0.513 | 51.282 | 0.105 | 10.527 | 2.105 | 0.280 | 27.992 | 5.188 | -0.359 | -35.887 | TG             | Open Sea | Interon 2/22  | Tu28   | DBM1JG5000000000 | chv5.0000000-1110048 | DBM1JG5000000000 | 13.334 | 7.378  | 0.903 | 2.226 | -1.887 | 0.0002 | 0.0749                                                                        | tail of coat of virus family D2, member 1 (1 Source MG1   Symbol Acc: MG1-186862)        |
| chv5 | 111.028.579 | + | QCS | 0.0027 | 0.0048 | 0.865 | 86.486 | 0.600 | 60.000 | 0.104 | 10.384 | 2.077 | 0.181 | 18.054 | 3.611 | -0.215 | -21.488 | TG             | Open Sea | Interon 2/22  | Tu28   | DBM1JG5000000000 | chv5.0000000-1110048 | DBM1JG5000000000 | 13.334 | 7.378  | 0.903 | 2.226 | -1.887 | 0.0002 | 0.0749                                                                        | tail of coat of virus family D2, member 1 (1 Source MG1   Symbol Acc: MG1-186862)        |
| chv5 | 111.116.813 | + | QCS | 0.0000 | 0.0003 | 0.849 | 84.904 | 0.574 | 57.407 | 0.081 | 8.086  | 1.817 | 0.101 | 10.124 | 2.025 | -0.275 | -27.455 | TG             | Open Sea | Interon 2/22  | Tu28   | DBM1JG5000000000 | chv5.0000000-1110048 | DBM1JG5000000000 | 13.334 | 7.378  | 0.903 | 2.226 | -1.887 | 0.0002 | 0.0749                                                                        | tail of coat of virus family D2, member 1 (1 Source MG1   Symbol Acc: MG1-186862)        |
| chv5 | 112.447.577 | + | QCS | 0.0478 | 0.0169 | 0.839 | 83.871 | 0.600 | 60.000 | 0.416 | 41.625 | 8.325 | 0.147 | 14.713 | 2.147 | -0.238 | -23.871 | --             | Open Sea | Interon 9/16  | Shv1   | DBM1JG5000000000 | chv5.0000000-1120048 | DBM1JG5000000007 | 23.233 | 11.580 | 0.819 | 4.283 | -2.088 | 0.0015 | 0.0086                                                                        | tail of coat of virus family D2, member 1 (1 Source MG1   Symbol Acc: MG1-186862)        |
| chv5 | 112.447.577 | + | QCS | 0.0478 | 0.0169 | 0.839 | 83.871 | 0.600 | 60.000 | 0.416 | 41.625 | 8.325 | 0.147 | 14.713 | 2.147 | -0.238 | -23.871 | --             | Open Sea | Interon 9/16  | Shv1   | DBM1JG5000000000 | chv5.0000000-1120048 | DBM1JG5000000007 | 10.884 | 5.349  | 0.620 | 2.074 | -2.037 | 0.0001 | 0.0001                                                                        | tail of coat of virus family D2, member 1 (1 Source MG1   Symbol Acc: MG1-186862)        |
| chv5 | 115.346.842 | + | QCS | 0.0049 | 0.1522 | 0.419 | 41.880 | 0.167 | 16.887 | 0.233 | 23.349 | 4.470 | 0.138 | 13.773 | 2.755 | -0.232 | -23.184 | --             | S Shore  | TBS 1000      | Quv1   | DBM1JG5000000000 | chv5.0000000-1150048 | DBM1JG5000000006 | 1.585  | 3.240  | 0.581 | 0.714 | 2.036  | 0.0043 | 0.0008                                                                        | cytoplasmic c domain subunit 1 (1 Source MG1   Symbol Acc: MG1-186862)                   |
| chv5 | 120.072.394 | + | QCS | 0.0002 | 0.1439 | 0.586 | 58.574 | 0.804 | 80.382 | 0.268 | 26.853 | 4.121 | 0.259 | 25.852 | 5.170 | 0.288  | 28.818  | --             | Open Sea | Interon 2/27  | Shv1   | DBM1JG5000000000 | chv5.0000000-1200048 | DBM1JG5000000006 | 11.434 | 6.240  | 0.927 | 0.888 | -1.127 | 0.0043 | 0.0011                                                                        | tail of coat of virus family D2, member 1 (1 Source MG1   Symbol Acc: MG1-186862)        |
| chv5 | 121.054.888 | + | QCS | 0.0003 | 0.0086 | 0.803 | 80.284 | 0.602 | 60.162 | 0.110 | 11.449 | 2.284 | 0.083 | 8.309  | 1.862 | -0.231 | -23.132 | CS             | Open Sea | JUR1          | Chv5   | DBM1JG5000000000 | chv5.0000000-1210048 | DBM1JG5000000006 | 5.451  | 2.806  | 0.838 | 0.912 | -1.857 | 0.0019 | 0.0754                                                                        | tail of coat of virus family D2, member 1 (1 Source MG1   Symbol Acc: MG1-186862)        |
| chv5 | 128.476.876 | + | QCS | 0.0002 | 0.0002 | 0.519 | 51.902 | 0.808 | 80.808 | 0.314 | 31.385 | 4.277 | 0.415 | 41.560 | 3.300 | 0.368  | 36.787  | fg             | Open Sea | Interon 2/20  | Chv5   | DBM1JG5000000000 | chv5.0000000-1280048 | DBM1JG5000000007 | 0.952  | 2.451  | 0.438 | 0.719 | 2.878  | 0.0043 | 0.0019                                                                        | tail of coat of virus family D2, member 1 (1 Source MG1   Symbol Acc: MG1-186862)        |
| chv5 | 140.074.647 | + | QCS | 0.0009 | 0.0005 | 0.846 | 84.615 | 0.577 | 57.602 | 0.139 | 13.844 | 2.773 | 0.240 | 23.979 | 4.746 | -0.359 | -35.882 | CS             | Open Sea | Interon 1/3   | Guv1   | DBM1JG5000000000 | chv5.0000000-1400048 | DBM1JG5000000006 | 17.002 | 21.346 | 1.002 | 1.002 | 1.234  | 0.0001 | 0.0758                                                                        | transmembrane domain protein receptor (1 Source MG1   Symbol Acc: MG1-186862)            |
| chv5 | 140.074.647 | + | QCS | 0.0009 | 0.0005 | 0.846 | 84.615 | 0.577 | 57.602 | 0.139 | 13.844 | 2.773 | 0.240 | 23.979 | 4.746 | -0.359 | -35.882 | CS             | N Shore  | TBS 1000      | Guv1   | DBM1JG5000000000 | chv5.0000000-1400048 | DBM1JG5000000006 | 11.613 | 6.388  | 1.418 | 0.951 | -1.818 | 0.0004 | 0.0486                                                                        | transmembrane domain protein receptor (1 Source MG1   Symbol Acc: MG1-186862)            |
| chv5 | 140.247.043 | + | QCS | 0.0105 | 0.0002 | 0.362 | 36.216 | 0.638 | 63.830 | 0.260 | 26.954 | 5.791 | 0.153 | 15.348 | 3.070 | 0.246  | 24.614  | --             | Open Sea | Interon 1/11  | Chv5   | DBM1JG5000000000 | chv5.0000000-1400048 | DBM1JG5000000006 | 2.958  | 5.684  | 1.006 | 0.879 | 1.921  | 0.0005 | 0.0775                                                                        | transmembrane domain protein receptor (1 Source MG1   Symbol Acc: MG1-186862)            |
| chv5 | 147.083.285 | + | QCS | 0.0000 | 0.0007 | 0.873 | 87.307 | 0.738 | 70.769 | 0.183 | 18.262 | 3.656 | 0.149 | 14.881 | 2.978 | -0.185 | -18.555 | Check manually | Open Sea | Interon 12/12 | Shv1   | DBM1JG5000000000 | chv5.0000000-1470048 | DBM1JG5000000006 | 11.327 | 6.004  | 1.384 | 0.729 | -1.410 | 0.0006 | 0.0787                                                                        | transmembrane domain protein receptor (1 Source MG1   Symbol Acc: MG1-186862)            |
| chv5 | 147.083.810 | + | QCS | 0.0045 | 0.0081 | 0.250 | 25.000 | 0.583 | 58.333 | 0.221 | 22.066 | 4.413 | 0.276 | 27.658 | 5.121 | 0.333  | 33.333  | --             | N Shore  | Interon 1/12  | Shv1   | DBM1JG5000000000 | chv5.0000000-1470048 | DBM1JG5000000006 | 11.327 | 6.004  | 1.384 | 0.729 | -1.410 | 0.0006 | 0.0787                                                                        | transmembrane domain protein receptor (1 Source MG1   Symbol Acc: MG1-186862)            |
| chv5 | 147.083.810 | + | QCS | 0.0045 | 0.0081 | 0.250 | 25.000 | 0.583 | 58.333 | 0.221 | 22.066 | 4.413 | 0.276 | 27.658 | 5.121 | 0.333  | 33.333  | --             | N Shore  | Interon 1/12  | Shv1   | DBM1JG5000000000 | chv5.0000000-1470048 | DBM1JG5000000006 | 11.327 | 6.004  | 1.384 | 0.729 | -1.410 | 0.0006 | 0.0787                                                                        | transmembrane domain protein receptor (1 Source MG1   Symbol Acc: MG1-186862)            |
| chv5 | 148.054.682 | + | QCS | 0.0165 | 0.0007 | 0.364 | 36.364 | 0.737 | 73.737 | 0.232 | 23.186 | 4.437 | 0.182 | 18.180 | 3.037 | 0.364  | 36.364  | OK             | Open Sea | Interon 1/4   | Uchv5  | DBM1JG5000000000 | chv5.0000000-1480048 | DBM1JG5000000006 | 66.662 | 52.724 | 4.880 | 2.588 | -1.384 | 0.0013 | 0.0086                                                                        | ultra-hi-3 (1 Source MG1   Symbol Acc: MG1-186862)                                       |
| chv5 | 150.046.846 | + | QCS | 0.0102 | 0.0004 | 0.862 | 86.207 | 0.677 | 67.682 | 0.114 | 11.359 | 2.274 | 0.091 | 9.102  | 2.638 | -0.185 | -18.555 | --             | Open Sea | Interon 1/15  | Chv5   | DBM1JG5000000007 | chv5.0000000-1500048 | DBM1JG5000000006 | 1.388  | 2.182  | 0.288 | 0.281 | 1.738  | 0.0010 | 0.0009                                                                        | transmembrane domain protein receptor (1 Source MG1   Symbol Acc: MG1-186862)            |
| chv5 | 150.046.846 | + | QCS | 0.0102 | 0.0004 | 0.862 | 86.207 | 0.677 | 67.682 | 0.114 | 11.359 | 2.274 | 0.091 | 9.102  | 2.638 | -0.185 | -18.555 | --             | Open Sea | Interon 1/15  | Chv5   | DBM1JG5000000007 | chv5.0000000-1500048 | DBM1JG5000000006 | 1.388  | 2.182  | 0.288 | 0.281 | 1.738  | 0.0010 | 0.0009                                                                        | transmembrane domain protein receptor (1 Source MG1   Symbol Acc: MG1-186862)            |
| chv5 | 150.046.846 | + | QCS | 0.0102 | 0.0004 | 0.862 | 86.207 | 0.677 | 67.682 | 0.114 | 11.359 | 2.274 | 0.091 | 9.102  | 2.638 | -0.185 | -18.555 | --             | Open Sea | Interon 1/15  | Chv5   | DBM1JG5000000007 | chv5.0000000-1500048 | DBM1JG5000000006 | 1.388  | 2.182  | 0.288 | 0.281 | 1.738  | 0.0010 | 0.0009                                                                        | transmembrane domain protein receptor (1 Source MG1   Symbol Acc: MG1-186862)            |
| chv5 | 150.046.846 | + | QCS | 0.0102 | 0.0004 | 0.862 | 86.207 | 0.677 | 67.682 | 0.114 | 11.359 | 2.274 | 0.091 | 9.102  | 2.638 | -0.185 | -18.555 | --             | Open Sea | Interon 1/15  | Chv5   | DBM1JG5000000007 | chv5.0000000-1500048 | DBM1JG5000000006 | 1.388  | 2.     |       |       |        |        |                                                                               |                                                                                          |



|      |             |   |    |        |        |       |        |       |        |       |        |       |       |        |       |        |         |                |          |               |              |                   |                          |                          |                   |         |        |        |        |        |        |                                                                                           |                                                                           |
|------|-------------|---|----|--------|--------|-------|--------|-------|--------|-------|--------|-------|-------|--------|-------|--------|---------|----------------|----------|---------------|--------------|-------------------|--------------------------|--------------------------|-------------------|---------|--------|--------|--------|--------|--------|-------------------------------------------------------------------------------------------|---------------------------------------------------------------------------|
| chr7 | 34,338,480  | + | CG | 0.0037 | 0.0880 | 0.806 | 80.556 | 0.800 | 60.000 | 0.133 | 13.299 | 2.440 | 0.141 | 14.087 | 2.837 | -0.206 | -20.558 | CG             | nearby   | N Shd         | Interon 1/13 | 403449P09         | ENM1JG50000005071        | chr7:34338476-34338511   | ENM1JG50000008074 | 5.200   | 3.765  | 0.638  | 0.388  | -1.405 | 0.0000 | 0.0819                                                                                    | RNEN1ENM1-403449P09 gene 1 [Source MGI; Symbol Acc MGI: 160841]           |
| chr7 | 41,623,740  | + | CG | 0.0089 | 0.0484 | 0.673 | 67.330 | 0.789 | 70.142 | 0.111 | 11.092 | 2.718 | 0.043 | 4.332  | 0.866 | 0.168  | 10.822  | ---            | ---      | Interon 4/5   | 205014A19    | ENM1JG50000004974 | chr7:41623649-41623653   | ENM1JG50000004975        | 3.471             | 2.897   | 0.128  | 0.145  | -1.198 | 0.0002 | 0.0406 | RNEN1ENM1-205014A19 gene 1 [Source MGI; Symbol Acc MGI: 162602]                           |                                                                           |
| chr7 | 48,760,214  | + | CG | 0.0054 | 0.0540 | 0.548 | 54.830 | 0.200 | 25.000 | 0.289 | 28.942 | 5.188 | 0.185 | 18.499 | 3.700 | -0.208 | -20.838 | CA             | Shore    | Shore 1/3     | Panel2       | ENM1JG50000004974 | chr7:48760214-48760215   | ENM1JG50000004975        | 6.133             | 7.380   | 0.528  | 0.389  | 1.203  | 0.0002 | 0.0838 | protein arginine methyl transferase 3 [Source MGI; Symbol Acc MGI: 1198204]               |                                                                           |
| chr7 | 52,004,988  | + | CG | 0.0046 | 0.0046 | 0.167 | 16.407 | 0.417 | 41.607 | 0.403 | 40.298 | 8.400 | 0.153 | 15.290 | 3.058 | 0.260  | 25.000  | CG             | nearby   | Open Sea      | Interon 3/27 | Shp               | ENM1JG50000004983        | chr7:52004988-52004989   | ENM1JG50000004984 | 26.066  | 17.602 | 0.508  | 0.347  | -1.522 | 0.0001 | 0.0735                                                                                    | unit of GDP-HS-activating protein 3 [Source MGI; Symbol Acc MGI: 1622048] |
| chr7 | 65,338,313  | + | CG | 0.0085 | 0.0032 | 0.345 | 34.463 | 0.580 | 58.074 | 0.187 | 18.708 | 3.742 | 0.260 | 26.916 | 5.358 | 0.260  | 24.462  | CA             | Open Sea | Interon 23/27 | Shp          | ENM1JG50000004983 | chr7:65338313-65338314   | ENM1JG50000004984        | 17.449            | 13.265  | 0.568  | 0.443  | -1.395 | 0.0016 | 0.0702 | light protein-protein 1 [Source MGI; Symbol Acc MGI: 160750]                              |                                                                           |
| chr7 | 65,338,943  | + | CG | 0.0049 | 0.1193 | 0.172 | 17.241 | 0.383 | 38.344 | 0.089 | 8.924  | 1.985 | 0.221 | 22.072 | 4.014 | 0.221  | 22.160  | CT             | Open Sea | Interon 5/27  | Shp          | ENM1JG50000004983 | chr7:65338943-65338944   | ENM1JG50000004984        | 17.449            | 13.265  | 0.568  | 0.443  | -1.395 | 0.0016 | 0.0702 | light protein-protein 1 [Source MGI; Symbol Acc MGI: 160750]                              |                                                                           |
| chr7 | 65,338,943  | + | CG | 0.0079 | 0.0709 | 0.488 | 48.846 | 0.714 | 71.428 | 0.274 | 27.394 | 5.179 | 0.087 | 8.718  | 1.744 | 0.238  | 22.783  | AG             | Open Sea | Interon 1/18  | Shp          | ENM1JG50000004983 | chr7:65338943-65338944   | ENM1JG50000004984        | 17.449            | 13.265  | 0.568  | 0.443  | -1.395 | 0.0016 | 0.0702 | light protein-protein 1 [Source MGI; Symbol Acc MGI: 160750]                              |                                                                           |
| chr7 | 65,354,643  | + | CG | 0.0083 | 0.0001 | 0.909 | 90.900 | 0.780 | 78.903 | 0.187 | 18.688 | 3.158 | 0.134 | 13.364 | 2.473 | -0.143 | -14.347 | TS             | Open Sea | Interon 2/27  | Shp          | ENM1JG50000004983 | chr7:65354643-65354644   | ENM1JG50000004984        | 17.449            | 13.265  | 0.568  | 0.443  | -1.395 | 0.0016 | 0.0702 | light protein-protein 1 [Source MGI; Symbol Acc MGI: 160750]                              |                                                                           |
| chr7 | 65,354,643  | + | CG | 0.0027 | 0.0001 | 0.885 | 88.500 | 0.652 | 67.164 | 0.183 | 18.306 | 3.881 | 0.240 | 24.088 | 4.000 | -0.213 | -21.307 | AA             | Open Sea | Interon 2/27  | Shp          | ENM1JG50000004983 | chr7:65354643-65354644   | ENM1JG50000004984        | 17.449            | 13.265  | 0.568  | 0.443  | -1.395 | 0.0016 | 0.0702 | light protein-protein 1 [Source MGI; Symbol Acc MGI: 160750]                              |                                                                           |
| chr7 | 81,892,388  | + | CG | 0.0003 | 0.0718 | 0.167 | 16.707 | 0.378 | 37.778 | 0.187 | 18.747 | 2.149 | 0.284 | 28.433 | 5.887 | 0.211  | 21.111  | TA             | N Shore  | Interon 1/1   | G-H 4000     | ENM1JG50000000088 | chr7:81892388-81892389   | ENM1JG50000000089        | 3.478             | 1.752   | 0.740  | 0.807  | -1.085 | 0.0005 | 0.0886 | proteolipid gene 40889 [Source MGI; Symbol Acc MGI: 1575475]                              |                                                                           |
| chr7 | 81,275,521  | + | CG | 0.0095 | 0.0046 | 0.760 | 76.000 | 0.459 | 45.946 | 0.376 | 37.594 | 5.159 | 0.214 | 21.427 | 4.287 | -0.301 | -30.564 | CG             | nearby   | S Shore       | Interon 1/21 | Phallo            | ENM1JG50000000088        | chr7:81275521-81275522   | ENM1JG50000000089 | 17.100  | 11.124 | 0.412  | 0.234  | -1.545 | 0.0008 | 0.0883                                                                                    | phosphatidylesterase 8A [Source MGI; Symbol Acc MGI: 1577161]             |
| chr7 | 86,133,381  | + | CG | 0.0046 | 0.0046 | 0.333 | 33.333 | 0.130 | 13.040 | 0.189 | 18.944 | 3.189 | 0.115 | 11.544 | 2.309 | -0.303 | -30.280 | TS             | S Shd    | Interon 1/18  | Phallo       | ENM1JG50000000088 | chr7:86133381-86133382   | ENM1JG50000000089        | 0.059             | 1.946   | 0.132  | 0.759  | 30.045 | 0.0046 | 0.0001 | phosphatidylesterase 8A [Source MGI; Symbol Acc MGI: 1577161]                             |                                                                           |
| chr7 | 87,582,278  | + | CG | 0.0046 | 0.0008 | 0.161 | 16.128 | 0.400 | 40.000 | 0.116 | 11.638 | 2.328 | 0.223 | 22.325 | 4.465 | 0.238  | 23.871  | CG             | nearby   | S Shore       | Interon 1/15 | Arf1              | ENM1JG50000000088        | chr7:87582278-87582279   | ENM1JG50000000089 | 4.303   | 3.676  | 0.311  | 0.248  | -1.195 | 0.0042 | 0.0003                                                                                    | renin-binding factor 1 [Source MGI; Symbol Acc MGI: 1586205]              |
| chr7 | 87,582,278  | + | CG | 0.0046 | 0.0008 | 0.161 | 16.128 | 0.400 | 40.000 | 0.116 | 11.638 | 2.328 | 0.223 | 22.325 | 4.465 | 0.238  | 23.871  | CG             | nearby   | S Shore       | Interon 1/14 | Arf1              | ENM1JG50000000088        | chr7:87582278-87582279   | ENM1JG50000000089 | 0.377   | 1.125  | 0.301  | 0.241  | 2.083  | 0.0008 | 0.0000                                                                                    | renin-binding factor 1 [Source MGI; Symbol Acc MGI: 1586205]              |
| chr7 | 87,582,322  | + | CG | 0.0029 | 0.0008 | 0.276 | 27.588 | 0.654 | 65.285 | 0.267 | 26.659 | 5.132 | 0.212 | 21.256 | 4.241 | 0.378  | 37.788  | AG             | S Shore  | Interon 1/15  | Arf1         | ENM1JG50000000088 | chr7:87582322-87582323   | ENM1JG50000000089        | 4.303             | 3.676   | 0.311  | 0.248  | -1.195 | 0.0042 | 0.0003 | renin-binding factor 1 [Source MGI; Symbol Acc MGI: 1586205]                              |                                                                           |
| chr7 | 87,582,322  | + | CG | 0.0029 | 0.0008 | 0.276 | 27.588 | 0.654 | 65.285 | 0.267 | 26.659 | 5.132 | 0.212 | 21.256 | 4.241 | 0.378  | 37.788  | AG             | S Shore  | Interon 1/14  | Arf1         | ENM1JG50000000088 | chr7:87582322-87582323   | ENM1JG50000000089        | 0.377             | 1.125   | 0.301  | 0.241  | 2.083  | 0.0008 | 0.0000 | renin-binding factor 1 [Source MGI; Symbol Acc MGI: 1586205]                              |                                                                           |
| chr7 | 87,582,368  | + | CG | 0.0042 | 0.0008 | 0.154 | 15.365 | 0.409 | 40.908 | 0.080 | 8.027  | 1.805 | 0.265 | 26.489 | 5.294 | 0.255  | 25.544  | CT             | S Shore  | Interon 1/15  | Arf1         | ENM1JG50000000088 | chr7:87582368-87582369   | ENM1JG50000000089        | 4.303             | 3.676   | 0.311  | 0.248  | -1.195 | 0.0042 | 0.0003 | renin-binding factor 1 [Source MGI; Symbol Acc MGI: 1586205]                              |                                                                           |
| chr7 | 87,582,368  | + | CG | 0.0042 | 0.0008 | 0.154 | 15.365 | 0.409 | 40.908 | 0.080 | 8.027  | 1.805 | 0.265 | 26.489 | 5.294 | 0.255  | 25.544  | CT             | S Shore  | Interon 1/15  | Arf1         | ENM1JG50000000088 | chr7:87582368-87582369   | ENM1JG50000000089        | 0.377             | 1.125   | 0.301  | 0.241  | 2.083  | 0.0008 | 0.0000 | renin-binding factor 1 [Source MGI; Symbol Acc MGI: 1586205]                              |                                                                           |
| chr7 | 87,405,442  | + | CG | 0.0071 | 0.0011 | 0.676 | 67.667 | 0.900 | 90.000 | 0.103 | 10.266 | 2.053 | 0.204 | 20.445 | 4.088 | 0.233  | 23.262  | ---            | ---      | Open Sea      | Interon 1/15 | Arf1              | ENM1JG50000000088        | chr7:87405442-87405443   | ENM1JG50000000089 | 4.303   | 3.676  | 0.311  | 0.248  | -1.195 | 0.0042 | 0.0003                                                                                    | renin-binding factor 1 [Source MGI; Symbol Acc MGI: 1586205]              |
| chr7 | 87,405,442  | + | CG | 0.0071 | 0.0011 | 0.676 | 67.667 | 0.900 | 90.000 | 0.103 | 10.266 | 2.053 | 0.204 | 20.445 | 4.088 | 0.233  | 23.262  | ---            | ---      | Open Sea      | Interon 1/14 | Arf1              | ENM1JG50000000088        | chr7:87405442-87405443   | ENM1JG50000000089 | 0.377   | 1.125  | 0.301  | 0.241  | 2.083  | 0.0008 | 0.0000                                                                                    | renin-binding factor 1 [Source MGI; Symbol Acc MGI: 1586205]              |
| chr7 | 87,404,943  | + | CG | 0.0071 | 0.0011 | 0.676 | 67.667 | 0.900 | 90.000 | 0.103 | 10.266 | 2.053 | 0.204 | 20.445 | 4.088 | 0.233  | 23.262  | ---            | ---      | Open Sea      | Interon 1/14 | Arf1              | ENM1JG50000000088        | chr7:87404943-87404944   | ENM1JG50000000089 | 4.303   | 3.676  | 0.311  | 0.248  | -1.195 | 0.0042 | 0.0003                                                                                    | renin-binding factor 1 [Source MGI; Symbol Acc MGI: 1586205]              |
| chr7 | 87,404,943  | + | CG | 0.0055 | 0.1727 | 0.458 | 45.833 | 0.781 | 78.261 | 0.361 | 36.113 | 7.223 | 0.160 | 16.166 | 3.197 | 0.304  | 30.438  | AA             | Open Sea | Interon 2/14  | Arf1         | ENM1JG50000000088 | chr7:87404943-87404944   | ENM1JG50000000089        | 0.377             | 1.125   | 0.301  | 0.241  | 2.083  | 0.0008 | 0.0000 | renin-binding factor 1 [Source MGI; Symbol Acc MGI: 1586205]                              |                                                                           |
| chr7 | 102,186,546 | + | CG | 0.0058 | 0.1886 | 0.584 | 58.404 | 0.838 | 82.758 | 0.078 | 7.795  | 1.559 | 0.189 | 18.814 | 3.763 | 0.239  | 23.920  | ---            | ---      | Open Sea      | Interon 3/22 | Arf1              | ENM1JG50000000088        | chr7:102186546-102186547 | ENM1JG50000000089 | 13.003  | 6.643  | 0.680  | 1.285  | -1.348 | 0.0001 | 0.0735                                                                                    | nucleosome 88 [Source MGI; Symbol Acc MGI: 1608404]                       |
| chr7 | 102,238,734 | + | CG | 0.0031 | 0.2525 | 0.467 | 46.714 | 0.710 | 71.622 | 0.268 | 26.812 | 5.342 | 0.169 | 16.842 | 3.388 | -0.341 | -34.080 | ---            | ---      | N Shore       | Interon 1/22 | Arf1              | ENM1JG50000000088        | chr7:102238734-102238735 | ENM1JG50000000089 | 13.003  | 6.643  | 0.680  | 1.285  | -1.348 | 0.0001 | 0.0735                                                                                    | nucleosome 88 [Source MGI; Symbol Acc MGI: 1608404]                       |
| chr7 | 110,181,158 | + | CG | 0.0031 | 0.0006 | 0.486 | 48.751 | 0.703 | 70.230 | 0.103 | 10.274 | 2.055 | 0.171 | 17.078 | 3.476 | 0.307  | 30.759  | TS             | Open Sea | Interon 1/1   | Arf1         | ENM1JG50000000088 | chr7:110181158-110181159 | ENM1JG50000000089        | 9.749             | 5.870   | 0.540  | 0.588  | -1.401 | 0.0004 | 0.0477 | lymphatic vessel endothelial hyaluronan receptor 1 [Source MGI; Symbol Acc MGI: 1705454]  |                                                                           |
| chr7 | 110,184,619 | + | CG | 0.0037 | 0.0002 | 0.173 | 17.308 | 0.364 | 36.364 | 0.137 | 13.735 | 2.745 | 0.136 | 13.634 | 2.927 | 0.191  | 19.056  | Check manually | Open Sea | Interon 1/10  | Arf1         | ENM1JG50000000088 | chr7:110184619-110184620 | ENM1JG50000000089        | 9.749             | 5.870   | 0.540  | 0.588  | -1.401 | 0.0004 | 0.0477 | lymphatic vessel endothelial hyaluronan receptor 1 [Source MGI; Symbol Acc MGI: 1705454]  |                                                                           |
| chr7 | 111,051,083 | + | CG | 0.0038 | 0.1716 | 0.844 | 84.434 | 0.531 | 53.125 | 0.130 | 13.042 | 2.458 | 0.281 | 28.079 | 5.676 | -0.313 | -31.255 | AT             | Open Sea | Interon 22/24 | Cyfl         | ENM1JG50000000088 | chr7:111051083-111051084 | ENM1JG50000000089        | 13.717            | 11.258  | 0.583  | 0.987  | -1.238 | 0.0007 | 0.0474 | CTDH homolog, Rb YFM polymerase 11 complex component [Source MGI; Symbol Acc MGI: 158484] |                                                                           |
| chr7 | 116,511,684 | + | CG | 0.0034 | 0.1047 | 0.438 | 43.750 | 0.649 | 64.912 | 0.180 | 18.185 | 3.797 | 0.087 | 8.702  | 1.440 | 0.212  | 21.162  | TS             | Open Sea | Interon 1/13  | Arf1         | ENM1JG50000000088 | chr7:116511684-116511685 | ENM1JG50000000089        | 105.058           | 385.643 | 21.902 | 40.040 | 2.961  | 0.0040 | 0.0885 | nucleosome 2 [Source MGI; Symbol Acc MGI: 1608378]                                        |                                                                           |
| chr7 | 123,382,845 | + | CG | 0.0040 | 0.0005 | 0.333 | 33.333 | 0.583 | 58.360 | 0.160 | 16.166 | 3.193 | 0.226 | 22.573 | 4.015 | 0.228  | 22.927  | Check manually | Open Sea | Interon 1/16  | Phallo       | ENM1JG50000000088 | chr7:123382845-123382846 | ENM1JG50000000089        | 12.526            | 6.625   | 1.489  | 1.556  | -1.452 | 0.0007 | 0.0878 | protein kinase C, beta 1 [Source MGI; Symbol Acc MGI: 157998]                             |                                                                           |
| chr7 | 123,382,845 | + | CG | 0.0038 | 0.0005 | 0.250 | 25.000 | 0.519 | 51.802 | 0.187 | 18.675 | 3.735 | 0.138 | 13.833 | 2.747 | 0.289  | 28.852  | Check manually | Open Sea | Interon 2/16  | Phallo       | ENM1JG50000000088 | chr7:123382845-123382846 | ENM1JG50000000089        | 12.526            | 6.625   | 1.489  | 1.556  | -1.452 | 0.0007 | 0.0878 | protein kinase C, beta 1 [Source MGI; Symbol Acc MGI: 157998]                             |                                                                           |
| chr7 | 123,382,284 | + | CG | 0.0088 | 0.0004 | 0.848 | 84.780 | 0.515 | 51.515 | 0.114 | 11.389 | 2.274 | 0.237 | 23.721 | 4.744 | -0.383 | -38.267 | CA             | Open Sea | Interon 1/16  | Phallo       | ENM1JG50000000088 | chr7:123382284-123382285 | ENM1JG50000000089        | 12.526            | 6.625   | 1.489  | 1.556  | -1.452 | 0.0007 | 0.0878 | protein kinase C, beta 1 [Source MGI; Symbol Acc MGI: 157998]                             |                                                                           |
| chr7 | 123,975,227 | + | CG | 0.0087 | 0.0066 | 0.763 | 76.316 | 0.529 | 52.941 | 0.186 | 18.563 | 3.713 | 0.032 | 3.169  | 0.438 | -0.234 | -23.375 | AT             | Open Sea | Interon 1/2   | Arf1         | ENM1JG50000000088 | chr                      |                          |                   |         |        |        |        |        |        |                                                                                           |                                                                           |



|      |             |   |    |        |        |        |        |       |        |       |        |       |       |        |       |        |         |                |          |                   |          |                     |                      |                     |        |        |       |       |        |        |        |                                                                                         |
|------|-------------|---|----|--------|--------|--------|--------|-------|--------|-------|--------|-------|-------|--------|-------|--------|---------|----------------|----------|-------------------|----------|---------------------|----------------------|---------------------|--------|--------|-------|-------|--------|--------|--------|-----------------------------------------------------------------------------------------|
| chrX | 74,381,027  | + | CG | 0.0319 | 0.0640 | 0.9309 | 93.909 | 0.680 | 68.966 | 0.420 | 41.989 | 8.198 | 0.160 | 16.007 | 3.201 | -0.219 | -21.944 | CG: nearby     | N:Shore  | TSS: 2000         | See      | ENBAJ.GG.0000000885 | N:14352556-14352551  | ENBAJ.UTS0000000722 | 15.076 | 11.880 | 1.216 | 1.724 | -1.313 | 0.0053 | 0.0076 | 1st exon (Source MGI: Symbol Acc: MGI:1100026)                                          |
| chrX | 83,380,961  | + | CG | 0.0081 | 0.0081 | 0.731  | 73.146 | 0.884 | 88.300 | 0.076 | 7.602  | 1.120 | 0.252 | 25.244 | 5.049 | 0.152  | 15.240  | ---            | Open Sea | 1st exon: 35' 36" | Flair    | ENBAJ.GG.0000000678 | N:10354765-10354765  | ENBAJ.UTS0000000656 | 1.338  | 2.101  | 0.163 | 0.276 | 1.582  | 0.0014 | 0.0068 | polymerase (CNA:0-wed-est), alpha 1 (Source MGI: Symbol Acc: MGI:1106002)               |
| chrX | 83,423,848  | + | CG | 0.0142 | 0.0052 | 0.650  | 65.000 | 0.919 | 91.802 | 0.209 | 20.917 | 4.183 | 0.070 | 7.010  | 1.452 | 0.269  | 26.802  | Check manually | Open Sea | 1st exon: 34' 36" | Flair    | ENBAJ.GG.0000000678 | N:10354765-10354765  | ENBAJ.UTS0000000656 | 1.338  | 2.101  | 0.163 | 0.276 | 1.582  | 0.0014 | 0.0068 | polymerase (CNA:0-wed-est), alpha 1 (Source MGI: Symbol Acc: MGI:1106002)               |
| chrX | 83,440,234  | + | CG | 0.0064 | 0.0052 | 0.488  | 48.760 | 0.645 | 64.486 | 0.143 | 14.344 | 2.869 | 0.178 | 17.815 | 3.163 | 0.157  | 15.705  | TC             | Open Sea | 1st exon: 34' 36" | Flair    | ENBAJ.GG.0000000678 | N:10354765-10354765  | ENBAJ.UTS0000000656 | 1.338  | 2.101  | 0.163 | 0.276 | 1.582  | 0.0014 | 0.0068 | polymerase (CNA:0-wed-est), alpha 1 (Source MGI: Symbol Acc: MGI:1106002)               |
| chrX | 83,554,188  | + | CG | 0.0005 | 0.0778 | 0.487  | 48.759 | 0.676 | 67.619 | 0.242 | 24.221 | 4.844 | 0.147 | 14.662 | 2.152 | 0.189  | 18.880  | at             | Open Sea | 1st exon: 34' 36" | Flair    | ENBAJ.GG.0000000678 | N:10354765-10354765  | ENBAJ.UTS0000000656 | 1.338  | 2.101  | 0.163 | 0.276 | 1.582  | 0.0014 | 0.0068 | polymerase (CNA:0-wed-est), alpha 1 (Source MGI: Symbol Acc: MGI:1106002)               |
| chrX | 83,671,532  | + | CG | 0.0112 | 0.2108 | 0.450  | 45.000 | 0.813 | 81.200 | 0.281 | 28.107 | 5.021 | 0.183 | 18.318 | 3.684 | 0.363  | 36.200  | ---            | Open Sea | 1st exon: 3' 36"  | Flair    | ENBAJ.GG.0000000678 | N:10354765-10354765  | ENBAJ.UTS0000000656 | 1.338  | 2.101  | 0.163 | 0.276 | 1.582  | 0.0014 | 0.0068 | polymerase (CNA:0-wed-est), alpha 1 (Source MGI: Symbol Acc: MGI:1106002)               |
| chrX | 84,786,388  | + | CG | 0.0013 | 0.0022 | 0.386  | 38.620 | 0.789 | 78.920 | 0.218 | 21.763 | 4.353 | 0.142 | 14.169 | 2.840 | 0.373  | 37.300  | GC             | N:Shore  | Check manually    | G:126517 | ENBAJ.GG.0000000740 | N:10470102-10470107  | ENBAJ.UTS0000000801 | 5.089  | 3.328  | 0.214 | 0.602 | -1.532 | 0.0016 | 0.0701 | pre-miR gene, 26517 (Source MGI: Symbol Acc: MGI:1147711)                               |
| chrX | 85,035,188  | + | CG | 0.0425 | 0.0759 | 0.805  | 80.488 | 0.958 | 95.814 | 0.159 | 15.889 | 3.174 | 0.233 | 23.345 | 4.689 | -0.247 | -24.674 | ---            | Open Sea | 1st exon: 8' 9"   | Arfter9  | ENBAJ.GG.0000000555 | N:95048054-05166381  | ENBAJ.UTS0000010876 | 1.773  | 0.967  | 0.275 | 0.270 | -1.634 | 0.0016 | 0.0088 | CE282 genome nucleotide exchange 1st or (G:PT) 9 (Source MGI: Symbol Acc: MGI:12443228) |
| chrX | 85,035,188  | + | CG | 0.0425 | 0.0759 | 0.805  | 80.488 | 0.958 | 95.814 | 0.159 | 15.889 | 3.174 | 0.233 | 23.345 | 4.689 | -0.247 | -24.674 | ---            | Open Sea | 1st exon: 8' 9"   | Arfter9  | ENBAJ.GG.0000000555 | N:95048054-05166381  | ENBAJ.UTS0000010883 | 1.587  | 0.768  | 0.300 | 0.303 | -2.087 | 0.0042 | 0.0005 | CE282 genome nucleotide exchange 1st or (G:PT) 9 (Source MGI: Symbol Acc: MGI:12443228) |
| chrX | 85,057,803  | + | CG | 0.0424 | 0.0750 | 0.704  | 70.370 | 0.417 | 41.807 | 0.186 | 18.589 | 3.918 | 0.332 | 33.234 | 6.447 | -0.287 | -28.754 | ---            | Open Sea | 1st exon: 8' 9"   | Arfter9  | ENBAJ.GG.0000000555 | N:95048054-05166381  | ENBAJ.UTS0000010876 | 1.773  | 0.967  | 0.275 | 0.270 | -1.634 | 0.0016 | 0.0088 | CE282 genome nucleotide exchange 1st or (G:PT) 9 (Source MGI: Symbol Acc: MGI:12443228) |
| chrX | 85,057,803  | + | CG | 0.0424 | 0.0750 | 0.704  | 70.370 | 0.417 | 41.807 | 0.186 | 18.589 | 3.918 | 0.332 | 33.234 | 6.447 | -0.287 | -28.754 | ---            | Open Sea | 1st exon: 8' 9"   | Arfter9  | ENBAJ.GG.0000000555 | N:95048054-05166381  | ENBAJ.UTS0000010883 | 1.587  | 0.768  | 0.300 | 0.303 | -2.087 | 0.0042 | 0.0005 | CE282 genome nucleotide exchange 1st or (G:PT) 9 (Source MGI: Symbol Acc: MGI:12443228) |
| chrX | 85,087,606  | + | CG | 0.0053 | 0.0087 | 0.727  | 72.727 | 0.888 | 88.775 | 0.131 | 13.061 | 2.432 | 0.130 | 12.873 | 2.175 | 0.170  | 17.046  | fg             | Open Sea | 1st exon: 7' 9"   | Arfter9  | ENBAJ.GG.0000000555 | N:95048054-05166381  | ENBAJ.UTS0000010876 | 1.773  | 0.967  | 0.275 | 0.270 | -1.634 | 0.0016 | 0.0088 | CE282 genome nucleotide exchange 1st or (G:PT) 9 (Source MGI: Symbol Acc: MGI:12443228) |
| chrX | 85,087,606  | + | CG | 0.0053 | 0.0087 | 0.727  | 72.727 | 0.888 | 88.775 | 0.131 | 13.061 | 2.432 | 0.130 | 12.873 | 2.175 | 0.170  | 17.046  | fg             | Open Sea | 1st exon: 7' 9"   | Arfter9  | ENBAJ.GG.0000000555 | N:95048054-05166381  | ENBAJ.UTS0000010883 | 1.587  | 0.768  | 0.300 | 0.303 | -2.087 | 0.0042 | 0.0005 | CE282 genome nucleotide exchange 1st or (G:PT) 9 (Source MGI: Symbol Acc: MGI:12443228) |
| chrX | 85,086,682  | + | CG | 0.0076 | 0.0883 | 0.857  | 85.714 | 0.620 | 62.857 | 0.138 | 13.819 | 2.784 | 0.087 | 8.747  | 1.749 | -0.228 | -22.857 | ---            | Open Sea | 1st exon: 4' 9"   | Arfter9  | ENBAJ.GG.0000000555 | N:95048054-05166381  | ENBAJ.UTS0000010876 | 1.773  | 0.967  | 0.275 | 0.270 | -1.634 | 0.0016 | 0.0088 | CE282 genome nucleotide exchange 1st or (G:PT) 9 (Source MGI: Symbol Acc: MGI:12443228) |
| chrX | 85,086,682  | + | CG | 0.0076 | 0.0883 | 0.857  | 85.714 | 0.620 | 62.857 | 0.138 | 13.819 | 2.784 | 0.087 | 8.747  | 1.749 | -0.228 | -22.857 | ---            | Open Sea | 1st exon: 4' 9"   | Arfter9  | ENBAJ.GG.0000000555 | N:95048054-05166381  | ENBAJ.UTS0000010883 | 1.587  | 0.768  | 0.300 | 0.303 | -2.087 | 0.0042 | 0.0005 | CE282 genome nucleotide exchange 1st or (G:PT) 9 (Source MGI: Symbol Acc: MGI:12443228) |
| chrX | 85,140,377  | + | CG | 0.0081 | 0.1686 | 0.851  | 85.146 | 0.716 | 71.522 | 0.085 | 8.517  | 1.703 | 0.119 | 11.884 | 2.377 | -0.136 | -13.587 | ---            | Open Sea | 1st exon: 1' 9"   | Arfter9  | ENBAJ.GG.0000000555 | N:95048054-05166381  | ENBAJ.UTS0000010876 | 1.773  | 0.967  | 0.275 | 0.270 | -1.634 | 0.0016 | 0.0088 | CE282 genome nucleotide exchange 1st or (G:PT) 9 (Source MGI: Symbol Acc: MGI:12443228) |
| chrX | 85,140,377  | + | CG | 0.0081 | 0.1686 | 0.851  | 85.146 | 0.716 | 71.522 | 0.085 | 8.517  | 1.703 | 0.119 | 11.884 | 2.377 | -0.136 | -13.587 | ---            | Open Sea | 1st exon: 1' 9"   | Arfter9  | ENBAJ.GG.0000000555 | N:95048054-05166381  | ENBAJ.UTS0000010883 | 1.587  | 0.768  | 0.300 | 0.303 | -2.087 | 0.0042 | 0.0005 | CE282 genome nucleotide exchange 1st or (G:PT) 9 (Source MGI: Symbol Acc: MGI:12443228) |
| chrX | 85,140,223  | + | CG | 0.0109 | 0.8131 | 0.625  | 62.500 | 0.800 | 80.851 | 0.312 | 31.243 | 4.249 | 0.056 | 5.610  | 1.122 | 0.184  | 18.381  | ---            | Open Sea | 1st exon: 1' 9"   | Arfter9  | ENBAJ.GG.0000000555 | N:95048054-05166381  | ENBAJ.UTS0000010876 | 1.773  | 0.967  | 0.275 | 0.270 | -1.634 | 0.0016 | 0.0088 | CE282 genome nucleotide exchange 1st or (G:PT) 9 (Source MGI: Symbol Acc: MGI:12443228) |
| chrX | 85,140,223  | + | CG | 0.0109 | 0.8131 | 0.625  | 62.500 | 0.800 | 80.851 | 0.312 | 31.243 | 4.249 | 0.056 | 5.610  | 1.122 | 0.184  | 18.381  | ---            | Open Sea | 1st exon: 1' 9"   | Arfter9  | ENBAJ.GG.0000000555 | N:95048054-05166381  | ENBAJ.UTS0000010883 | 1.587  | 0.768  | 0.300 | 0.303 | -2.087 | 0.0042 | 0.0005 | CE282 genome nucleotide exchange 1st or (G:PT) 9 (Source MGI: Symbol Acc: MGI:12443228) |
| chrX | 88,842,802  | + | CG | 0.0033 | 0.0033 | 0.732  | 73.154 | 0.602 | 60.100 | 0.130 | 13.045 | 2.409 | 0.056 | 5.846  | 1.189 | -0.130 | -13.054 | GC             | Open Sea | 1st exon: 1' 2"   | Stran28  | ENBAJ.GG.0000077719 | N:10882100-10882100  | ENBAJ.UTS0000000363 | 6.366  | 4.287  | 0.402 | 0.880 | -1.481 | 0.0037 | 0.0877 | transmembrane protein 28 (Source MGI: Symbol Acc: MGI:13648071)                         |
| chrX | 134,597,784 | + | CG | 0.0472 | 0.0472 | 0.706  | 70.588 | 0.511 | 51.064 | 0.144 | 14.408 | 2.882 | 0.244 | 24.412 | 4.882 | -0.185 | -18.524 | ---            | N:Shore  | 1st exon: 1' 6"   | GA       | ENBAJ.GG.0000077286 | N:13488148-13488125  | ENBAJ.UTS0000000321 | 5.779  | 8.338  | 0.714 | 0.631 | 1.443  | 0.0033 | 0.0475 | galact oxidase, alpha (Source MGI: Symbol Acc: MGI:11547346)                            |
| chrX | 134,602,489 | + | CG | 0.0037 | 0.0030 | 0.541  | 54.054 | 0.880 | 88.486 | 0.149 | 14.881 | 2.976 | 0.080 | 8.952  | 1.760 | 0.304  | 30.432  | ---            | S:Shore  | TSS: 1000         | GA       | ENBAJ.GG.0000000743 | N:13488148-13488125  | ENBAJ.UTS0000000360 | 5.779  | 8.338  | 0.714 | 0.631 | 1.443  | 0.0033 | 0.0475 | galact oxidase, alpha (Source MGI: Symbol Acc: MGI:11547346)                            |
| chrX | 152,304,274 | + | CG | 0.0107 | 0.1759 | 0.741  | 74.074 | 0.370 | 37.037 | 0.205 | 20.494 | 4.099 | 0.223 | 22.317 | 4.463 | -0.370 | -37.037 | ---            | Open Sea | 1st exon: 2' 2"   | Wnt7r    | ENBAJ.GG.0000000743 | N:10253487-10253485  | ENBAJ.UTS0000000360 | 7.363  | 4.883  | 0.403 | 1.081 | -1.935 | 0.0044 | 0.0911 | HmN3c adjacent non-coding (Source MGI: Symbol Acc: MGI:1030247)                         |
| chrX | 152,140,988 | + | CG | 0.0089 | 0.0003 | 0.200  | 20.000 | 0.580 | 58.000 | 0.131 | 13.095 | 2.679 | 0.261 | 26.112 | 7.226 | 0.360  | 36.000  | GA             | S:Shore  | 1st exon: 1' 10"  | Ragb     | ENBAJ.GG.000004803  | N:10253380-102537043 | ENBAJ.UTS0000000720 | 12.427 | 8.669  | 1.412 | 1.132 | -1.400 | 0.0016 | 0.0701 | Ran-related GTP-binding B (Source MGI: Symbol Acc: MGI:10388012)                        |
| chrX | 152,168,712 | + | CG | 0.0484 | 0.1883 | 0.765  | 76.471 | 0.914 | 91.275 | 0.274 | 27.438 | 7.488 | 0.131 | 13.056 | 2.611 | 0.149  | 14.800  | ---            | Open Sea | 1st exon: 5' 10"  | Ragb     | ENBAJ.GG.000004803  | N:10253380-102537043 | ENBAJ.UTS0000000720 | 12.427 | 8.669  | 1.412 | 1.132 | -1.400 | 0.0016 | 0.0701 | Ran-related GTP-binding B (Source MGI: Symbol Acc: MGI:10388012)                        |
| chrX | 164,024,863 | + | CG | 0.0036 | 0.0036 | 0.520  | 52.000 | 0.821 | 82.140 | 0.275 | 27.466 | 7.493 | 0.214 | 21.396 | 4.279 | 0.201  | 20.140  | ---            | Open Sea | 1st exon: 2' 6"   | Atg10    | ENBAJ.GG.0000033384 | N:10465036-104650752 | ENBAJ.UTS0000000756 | 1.448  | 4.388  | 0.756 | 0.988 | 3.032  | 0.0010 | 0.0625 | serpin repeat, and SDC3-like core motif 9 (Source MGI: Symbol Acc: MGI:11818548)        |











**Supplementary Table S13:** Prospective association between T2D and DNA methylation in blood cells of participants in a nested case-control subcohort from EPIC-Potsdam study. All CpG sites used in the analysis are included in the table. Methylation profiles were assessed by 850K arrays.

| CpG site   | Gene symbol     | Chromosome | unadjusted p-value | Estimate_direction | Genomic region |
|------------|-----------------|------------|--------------------|--------------------|----------------|
| cg27653023 | <i>GPC4</i>     | chrX       | 1.51E-05           | + T2D risk         | TSS200         |
| cg27635069 | <i>NGF</i>      | chr1       | 1.87E-05           | - T2D risk         | 5'UTR          |
| cg21919076 | <i>GRK5</i>     | chr10      | 1.90E-05           | + T2D risk         | Body           |
| cg06471042 | <i>MEIS2</i>    | chr15      | 3.75E-05           | - T2D risk         | 5'UTR          |
| cg06471042 | <i>MEIS2</i>    | chr15      | 3.75E-05           | - T2D risk         | TSS200         |
| cg06471042 | <i>MEIS2</i>    | chr15      | 3.75E-05           | - T2D risk         | TSS1500        |
| cg25381383 | <i>MEIS2</i>    | chr15      | 3.94E-05           | - T2D risk         | TSS1500        |
| cg18526361 | <i>PRKCB</i>    | chr16      | 4.57E-05           | - T2D risk         | TSS200         |
| cg12989718 | <i>MGRN1</i>    | chr16      | 4.91E-05           | + T2D risk         | Body           |
| cg12989718 | <i>MGRN1</i>    | chr16      | 4.91E-05           | + T2D risk         | 3'UTR          |
| cg01815730 | <i>KIAA1217</i> | chr10      | 5.78E-05           | + T2D risk         | Body           |
| cg24926872 | <i>ATP6V1H</i>  | chr8       | 6.41E-05           | - T2D risk         | 5'UTR          |
| cg24926872 | <i>ATP6V1H</i>  | chr8       | 6.41E-05           | - T2D risk         | TSS200         |
| cg01886741 | <i>BIRC5</i>    | chr17      | 8.84E-05           | - T2D risk         | 1stExon        |
| cg01886741 | <i>BIRC5</i>    | chr17      | 8.84E-05           | - T2D risk         | 5'UTR          |
| cg15848147 | <i>USP53</i>    | chr4       | 1.04E-04           | - T2D risk         | TSS1500        |
| cg16253064 | <i>STX6</i>     | chr1       | 1.30E-04           | + T2D risk         | 3'UTR          |
| cg17713780 | <i>ATP8A2</i>   | chr13      | 1.66E-04           | - T2D risk         | TSS1500        |
| cg15185106 | <i>AMD1</i>     | chr6       | 1.93E-04           | - T2D risk         | TSS1500        |
| cg02766895 | <i>TPCN1</i>    | chr12      | 2.18E-04           | - T2D risk         | 5'UTR          |
| cg07521618 | <i>PACS2</i>    | chr14      | 2.57E-04           | + T2D risk         | Body           |
| cg17489964 | <i>CTR9</i>     | chr11      | 2.78E-04           | - T2D risk         | TSS200         |
| cg03988778 | <i>SVIP</i>     | chr11      | 2.91E-04           | - T2D risk         | Body           |
| cg09697668 | <i>CHID1</i>    | chr11      | 2.94E-04           | + T2D risk         | 5'UTR          |
| cg02529459 | <i>PDLIM5</i>   | chr4       | 3.03E-04           | + T2D risk         | 5'UTR          |
| cg02529459 | <i>PDLIM5</i>   | chr4       | 3.03E-04           | + T2D risk         | Body           |
| cg17714232 | <i>ITGA1</i>    | chr5       | 3.17E-04           | - T2D risk         | Body           |
| cg16563929 | <i>DIP2C</i>    | chr10      | 3.29E-04           | - T2D risk         | Body           |
| cg26435149 | <i>ERC2</i>     | chr3       | 3.72E-04           | - T2D risk         | 3'UTR          |
| cg23098236 | <i>UBE2K</i>    | chr4       | 3.75E-04           | + T2D risk         | Body           |
| cg21568240 | <i>TAB2</i>     | chr6       | 3.83E-04           | - T2D risk         | 5'UTR          |
| cg21568240 | <i>TAB2</i>     | chr6       | 3.83E-04           | - T2D risk         | Body           |
| cg20891097 | <i>MEIS2</i>    | chr15      | 4.56E-04           | + T2D risk         | 5'UTR          |
| cg20891097 | <i>MEIS2</i>    | chr15      | 4.56E-04           | + T2D risk         | 1stExon        |
| cg20891097 | <i>MEIS2</i>    | chr15      | 4.56E-04           | + T2D risk         | Body           |
| cg20891097 | <i>MEIS2</i>    | chr15      | 4.56E-04           | + T2D risk         | TSS1500        |
| cg07374160 | <i>TANC2</i>    | chr17      | 4.71E-04           | - T2D risk         | Body           |
| cg18261462 | <i>SKAP1</i>    | chr17      | 4.78E-04           | - T2D risk         | TSS200         |
| cg10478435 | <i>KCNJ12</i>   | chr17      | 5.42E-04           | - T2D risk         | 5'UTR          |
| cg17455939 | <i>ATP2B1</i>   | chr12      | 5.46E-04           | + T2D risk         | Body           |
| cg02556117 | <i>KDM4B</i>    | chr19      | 5.50E-04           | + T2D risk         | Body           |
| cg27526736 | <i>PDE8A</i>    | chr15      | 5.60E-04           | + T2D risk         | 5'UTR          |
| cg27526736 | <i>PDE8A</i>    | chr15      | 5.60E-04           | + T2D risk         | Body           |
| cg20897685 | <i>SPOCK1</i>   | chr5       | 5.63E-04           | - T2D risk         | 5'UTR          |
| cg08442823 | <i>PHF21A</i>   | chr11      | 5.99E-04           | + T2D risk         | 3'UTR          |
| cg20027894 | <i>SGSM2</i>    | chr17      | 6.24E-04           | + T2D risk         | Body           |
| cg02145324 | <i>NPAT</i>     | chr11      | 6.31E-04           | - T2D risk         | Body           |
| cg17711763 | <i>ANK2</i>     | chr4       | 6.33E-04           | - T2D risk         | 1stExon        |
| cg17711763 | <i>ANK2</i>     | chr4       | 6.33E-04           | - T2D risk         | 5'UTR          |
| cg10051299 | <i>PACS2</i>    | chr14      | 6.40E-04           | - T2D risk         | TSS1500        |
| cg01355382 | <i>PHF21A</i>   | chr11      | 6.42E-04           | + T2D risk         | 3'UTR          |
| cg19769147 | <i>PACS2</i>    | chr14      | 6.45E-04           | + T2D risk         | Body           |
| cg07620889 | <i>RHBDD1</i>   | chr2       | 6.46E-04           | - T2D risk         | TSS200         |
| cg23299156 | <i>ST20</i>     | chr15      | 6.59E-04           | + T2D risk         | 5'UTR          |
| cg22066262 | <i>ROBO2</i>    | chr3       | 6.74E-04           | - T2D risk         | Body           |
| cg13795589 | <i>ULK4</i>     | chr3       | 6.89E-04           | + T2D risk         | Body           |
| cg10988513 | <i>DLL4</i>     | chr15      | 7.15E-04           | + T2D risk         | Body           |
| cg16495675 | <i>RTN4</i>     | chr2       | 7.30E-04           | + T2D risk         | TSS200         |
| cg16495675 | <i>RTN4</i>     | chr2       | 7.30E-04           | + T2D risk         | Body           |
| cg12091254 | <i>PDLIM5</i>   | chr4       | 7.35E-04           | - T2D risk         | 5'UTR          |
| cg12091254 | <i>PDLIM5</i>   | chr4       | 7.35E-04           | - T2D risk         | Body           |
| cg11479000 | <i>APC</i>      | chr5       | 7.63E-04           | - T2D risk         | 5'UTR          |



|            |                 |       |             |            |         |
|------------|-----------------|-------|-------------|------------|---------|
| cg00067574 | <i>RHOQ</i>     | chr2  | 7.73E-04    | - T2D risk | 1stExon |
| cg25625815 | <i>CUX2</i>     | chr12 | 7.78E-04    | + T2D risk | Body    |
| cg04094829 | <i>CUX1</i>     | chr7  | 7.78E-04    | + T2D risk | Body    |
| cg04583637 | <i>RAP2A</i>    | chr13 | 7.96E-04    | + T2D risk | TSS1500 |
| cg20011562 | <i>PHACTR1</i>  | chr6  | 8.00E-04    | - T2D risk | Body    |
| cg10107779 | <i>GGPS1</i>    | chr1  | 8.31E-04    | - T2D risk | TSS1500 |
| cg27365342 | <i>PHACTR1</i>  | chr6  | 8.54E-04    | + T2D risk | Body    |
| cg00025991 | <i>DIP2C</i>    | chr10 | 8.68E-04    | + T2D risk | TSS1500 |
| cg13580196 | <i>PDE8A</i>    | chr15 | 8.94E-04    | - T2D risk | Body    |
| cg18540455 | <i>CLASP2</i>   | chr3  | 9.36E-04    | - T2D risk | 5'UTR   |
| cg18540455 | <i>CLASP2</i>   | chr3  | 9.36E-04    | - T2D risk | 1stExon |
| cg25593249 | <i>ERC2</i>     | chr3  | 9.89E-04    | + T2D risk | 3'UTR   |
| cg05347173 | <i>TJP1</i>     | chr15 | 0.001068441 | - T2D risk | Body    |
| cg15933216 | <i>KIAA1109</i> | chr4  | 0.001070679 | - T2D risk | Body    |
| cg21008098 | <i>ZHX2</i>     | chr8  | 0.001083752 | - T2D risk | TSS1500 |
| cg01843524 | <i>ST20</i>     | chr15 | 0.001083862 | - T2D risk | TSS200  |
| cg06178492 | <i>COL4A1</i>   | chr13 | 0.001137303 | + T2D risk | Body    |
| cg08635723 | <i>ATXN1</i>    | chr6  | 0.00116436  | - T2D risk | 5'UTR   |
| cg22371518 | <i>MET</i>      | chr7  | 0.001290006 | - T2D risk | Body    |
| cg26462239 | <i>NPEPPS</i>   | chr17 | 0.001294059 | + T2D risk | 1stExon |
| cg22192368 | <i>ANK2</i>     | chr4  | 0.001298803 | + T2D risk | Body    |
| cg22928497 | <i>ANK3</i>     | chr10 | 0.001388522 | - T2D risk | Body    |
| cg01246802 | <i>PRKAG2</i>   | chr7  | 0.001390888 | + T2D risk | Body    |
| cg19825305 | <i>CLOCK</i>    | chr4  | 0.001441711 | - T2D risk | Body    |
| cg16854293 | <i>USP53</i>    | chr4  | 0.001446955 | - T2D risk | 5'UTR   |
| cg04979551 | <i>CREBBP</i>   | chr16 | 0.00149869  | - T2D risk | Body    |
| cg13504410 | <i>DYNC1I2</i>  | chr2  | 0.001511245 | - T2D risk | Body    |
| cg16505702 | <i>EFR3A</i>    | chr8  | 0.001512458 | + T2D risk | Body    |
| cg14225031 | <i>LMX1B</i>    | chr9  | 0.001543898 | - T2D risk | Body    |
| cg18913076 | <i>TSGA10</i>   | chr2  | 0.001589244 | + T2D risk | TSS200  |
| cg04382468 | <i>CLEC16A</i>  | chr16 | 0.001613303 | + T2D risk | Body    |
| cg26309715 | <i>DYNC1I1</i>  | chr7  | 0.001669947 | - T2D risk | Body    |
| cg05572930 | <i>RNF217</i>   | chr6  | 0.001714967 | - T2D risk | 3'UTR   |
| cg18594405 | <i>CUX1</i>     | chr7  | 0.001736718 | + T2D risk | Body    |
| cg04747406 | <i>ANK3</i>     | chr10 | 0.001741236 | + T2D risk | Body    |
| cg25637388 | <i>CLASP2</i>   | chr3  | 0.001780222 | - T2D risk | Body    |
| cg09219986 | <i>RHOA</i>     | chr3  | 0.001856579 | - T2D risk | Body    |
| cg02251315 | <i>PACRG</i>    | chr6  | 0.001859027 | - T2D risk | Body    |
| cg02403951 | <i>RBBP6</i>    | chr16 | 0.001874039 | + T2D risk | Body    |
| cg07438412 | <i>PACS2</i>    | chr14 | 0.001880501 | + T2D risk | Body    |
| cg26670792 | <i>LMX1B</i>    | chr9  | 0.001901158 | - T2D risk | TSS200  |
| cg06121031 | <i>KDM4B</i>    | chr19 | 0.001951148 | + T2D risk | Body    |
| cg02763189 | <i>APBA1</i>    | chr9  | 0.001974492 | + T2D risk | 3'UTR   |
| cg21729242 | <i>FLT1</i>     | chr13 | 0.002008309 | - T2D risk | Body    |
| cg09699430 | <i>CMTR1</i>    | chr6  | 0.002023642 | - T2D risk | Body    |
| cg25398032 | <i>PDLIM5</i>   | chr4  | 0.002043356 | + T2D risk | TSS1500 |
| cg00333583 | <i>PDE8A</i>    | chr15 | 0.002047574 | - T2D risk | Body    |
| cg02552307 | <i>PTPRU</i>    | chr1  | 0.002057286 | + T2D risk | Body    |
| cg22354782 | <i>NGF</i>      | chr1  | 0.002098306 | - T2D risk | TSS1500 |
| cg27347728 | <i>LAP3</i>     | chr4  | 0.002114158 | - T2D risk | TSS200  |
| cg26909924 | <i>LAMA4</i>    | chr6  | 0.002128141 | + T2D risk | Body    |
| cg04349506 | <i>DNAH9</i>    | chr17 | 0.0021415   | - T2D risk | Body    |
| cg12350036 | <i>CREBBP</i>   | chr16 | 0.002142327 | + T2D risk | Body    |
| cg07248377 | <i>MGRN1</i>    | chr16 | 0.002155533 | + T2D risk | Body    |
| cg11417616 | <i>TJP1</i>     | chr15 | 0.002175818 | - T2D risk | Body    |
| cg03929722 | <i>PRKAG2</i>   | chr7  | 0.002186145 | + T2D risk | Body    |
| cg06900418 | <i>PRKAG2</i>   | chr7  | 0.002298161 | - T2D risk | 5'UTR   |
| cg06900418 | <i>PRKAG2</i>   | chr7  | 0.002298161 | - T2D risk | 1stExon |
| cg01996920 | <i>AGPAT3</i>   | chr21 | 0.002300607 | + T2D risk | Body    |
| cg14694038 | <i>KDM4B</i>    | chr19 | 0.002367778 | + T2D risk | Body    |
| cg20873527 | <i>RAP1GAP2</i> | chr17 | 0.002369685 | + T2D risk | Body    |
| cg02198983 | <i>NDUFB3</i>   | chr2  | 0.002385657 | + T2D risk | TSS200  |
| cg05235431 | <i>RAP1GAP2</i> | chr17 | 0.002398723 | + T2D risk | Body    |
| cg11141437 | <i>RAP1GAP2</i> | chr17 | 0.002444243 | + T2D risk | Body    |
| cg09244071 | <i>CUX1</i>     | chr7  | 0.0025135   | + T2D risk | Body    |
| cg14156405 | <i>RGS7</i>     | chr1  | 0.00253313  | - T2D risk | 1stExon |
| cg14156405 | <i>RGS7</i>     | chr1  | 0.00253313  | - T2D risk | 5'UTR   |
| cg08668411 | <i>PDE8A</i>    | chr15 | 0.002556717 | - T2D risk | TSS200  |
| cg08668411 | <i>PDE8A</i>    | chr15 | 0.002556717 | - T2D risk | 5'UTR   |
| cg16531855 | <i>DNAJC13</i>  | chr3  | 0.002721789 | - T2D risk | Body    |



|            |          |       |             |            |         |
|------------|----------|-------|-------------|------------|---------|
| cg17720614 | KREMEN1  | chr22 | 0.002738005 | - T2D risk | TSS1500 |
| cg17720614 | KREMEN1  | chr22 | 0.002738005 | - T2D risk | TSS200  |
| cg08516083 | PLEKHG3  | chr14 | 0.002740396 | + T2D risk | Body    |
| cg05947499 | TPCN1    | chr12 | 0.002801892 | + T2D risk | Body    |
| cg16936281 | CHID1    | chr11 | 0.002838921 | + T2D risk | 1stExon |
| cg16936281 | CHID1    | chr11 | 0.002838921 | + T2D risk | 5'UTR   |
| cg08990088 | NUF2     | chr1  | 0.002860961 | - T2D risk | 5'UTR   |
| cg02750234 | NF1      | chr17 | 0.002898285 | - T2D risk | Body    |
| cg00901652 | CTR9     | chr11 | 0.002910943 | - T2D risk | TSS1500 |
| cg08090017 | IFT74    | chr9  | 0.00296211  | - T2D risk | 5'UTR   |
| cg09914263 | TENM2    | chr5  | 0.002971172 | - T2D risk | Body    |
| cg15881944 | SRPK2    | chr7  | 0.003118412 | - T2D risk | Body    |
| cg02089787 | PPFIBP1  | chr12 | 0.003120478 | - T2D risk | 5'UTR   |
| cg13653144 | LMX1B    | chr9  | 0.003135065 | - T2D risk | TSS1500 |
| cg03857847 | CLASP2   | chr3  | 0.00313611  | - T2D risk | Body    |
| cg03857847 | CLASP2   | chr3  | 0.00313611  | - T2D risk | TSS1500 |
| cg15266530 | CALD1    | chr7  | 0.003222097 | - T2D risk | 5'UTR   |
| cg24409063 | RAP1GAP2 | chr17 | 0.00323431  | - T2D risk | Body    |
| cg17861458 | DIP2C    | chr10 | 0.003329542 | + T2D risk | Body    |
| cg01047904 | PDE3A    | chr12 | 0.003331273 | - T2D risk | TSS1500 |
| cg02206526 | ADCY5    | chr3  | 0.003379193 | + T2D risk | Body    |
| cg03910724 | PRKCE    | chr2  | 0.003404074 | - T2D risk | Body    |
| cg26068141 | NCOA2    | chr8  | 0.00343328  | - T2D risk | 5'UTR   |
| cg00063703 | PDE3A    | chr12 | 0.003493844 | - T2D risk | TSS1500 |
| cg00063535 | TPCN1    | chr12 | 0.00351693  | + T2D risk | Body    |
| cg21122370 | SLIT3    | chr5  | 0.00352687  | - T2D risk | TSS1500 |
| cg03120841 | ASH1L    | chr1  | 0.00354398  | - T2D risk | Body    |
| cg11009792 | NQO1     | chr16 | 0.003566338 | - T2D risk | 5'UTR   |
| cg11009792 | NQO1     | chr16 | 0.003566338 | - T2D risk | TSS200  |
| cg11009792 | NQO1     | chr16 | 0.003566338 | - T2D risk | 1stExon |
| cg01443775 | PDE7A    | chr8  | 0.003624916 | + T2D risk | 3'UTR   |
| cg19885761 | CPLX2    | chr5  | 0.003663577 | - T2D risk | 5'UTR   |
| cg19885761 | CPLX2    | chr5  | 0.003663577 | - T2D risk | 1stExon |
| cg16789104 | SKAP1    | chr17 | 0.003664524 | - T2D risk | TSS200  |
| cg04138502 | ADCY5    | chr3  | 0.003666873 | - T2D risk | TSS200  |
| cg14922223 | NUF2     | chr1  | 0.003703843 | - T2D risk | TSS200  |
| cg22007739 | ASH1L    | chr1  | 0.003704614 | + T2D risk | 3'UTR   |
| cg09814034 | CDH22    | chr20 | 0.003757244 | + T2D risk | Body    |
| cg01089538 | ST6GAL1  | chr3  | 0.003770521 | + T2D risk | 5'UTR   |
| cg21113509 | ATRN     | chr20 | 0.003801463 | + T2D risk | Body    |
| cg27509153 | ERC2     | chr3  | 0.00380225  | + T2D risk | Body    |
| cg04301450 | RAP1GAP2 | chr17 | 0.003860252 | + T2D risk | Body    |
| cg20578356 | SEC31A   | chr4  | 0.003871252 | + T2D risk | Body    |
| cg16092330 | PACS2    | chr14 | 0.003882573 | - T2D risk | 3'UTR   |
| cg07351637 | GALK2    | chr15 | 0.003899757 | - T2D risk | Body    |
| cg14433374 | SCAF8    | chr6  | 0.003908965 | + T2D risk | Body    |
| cg01000056 | ANK3     | chr10 | 0.003912277 | - T2D risk | Body    |
| cg15063355 | CHFR     | chr12 | 0.00392493  | - T2D risk | TSS1500 |
| cg17918777 | ST20     | chr15 | 0.003962481 | - T2D risk | 5'UTR   |
| cg17918777 | ST20     | chr15 | 0.003962481 | - T2D risk | Body    |
| cg24852777 | CUX2     | chr12 | 0.00405559  | + T2D risk | Body    |
| cg01956003 | MTHFS    | chr15 | 0.004088613 | + T2D risk | TSS1500 |
| cg17823892 | PDE8A    | chr15 | 0.004109686 | - T2D risk | TSS200  |
| cg07750706 | PLAGL1   | chr6  | 0.004113839 | - T2D risk | 5'UTR   |
| cg01360545 | ANK3     | chr10 | 0.004117363 | - T2D risk | Body    |
| cg00499245 | DIP2C    | chr10 | 0.004154011 | + T2D risk | Body    |
| cg16004202 | FNIP2    | chr4  | 0.004194574 | - T2D risk | TSS1500 |
| cg01431319 | TIMM23   | chr10 | 0.004212516 | - T2D risk | Body    |
| cg16520815 | MGRN1    | chr16 | 0.0042219   | + T2D risk | Body    |
| cg08288320 | NQO1     | chr16 | 0.00424129  | + T2D risk | Body    |
| cg01703291 | PDE8A    | chr15 | 0.004276716 | + T2D risk | Body    |
| cg24089600 | COL4A1   | chr13 | 0.004299712 | - T2D risk | TSS1500 |
| cg22428867 | PDE7A    | chr8  | 0.004302285 | - T2D risk | Body    |
| cg18455616 | INPP4A   | chr2  | 0.004336491 | - T2D risk | 5'UTR   |
| cg25271919 | NGLY1    | chr3  | 0.004388735 | - T2D risk | 1stExon |
| cg25271919 | OXSM     | chr3  | 0.004388735 | - T2D risk | TSS200  |
| cg25271919 | NGLY1    | chr3  | 0.004388735 | - T2D risk | 5'UTR   |
| cg04900927 | MAN1A1   | chr6  | 0.004506392 | - T2D risk | Body    |
| cg09630589 | ARPP19   | chr15 | 0.00451213  | - T2D risk | Body    |
| cg10587454 | EFR3A    | chr8  | 0.004513776 | + T2D risk | Body    |



|            |          |       |             |            |         |
|------------|----------|-------|-------------|------------|---------|
| cg21906038 | UNC80    | chr2  | 0.004520735 | - T2D risk | TSS1500 |
| cg14083707 | AGPAT3   | chr21 | 0.004565736 | - T2D risk | 5'UTR   |
| cg21340207 | COL4A1   | chr13 | 0.004580633 | - T2D risk | Body    |
| cg21463518 | PRKAG2   | chr7  | 0.004605709 | + T2D risk | Body    |
| cg03182620 | DIP2C    | chr10 | 0.004647339 | - T2D risk | Body    |
| cg26155318 | YWHAQ    | chr2  | 0.004653932 | + T2D risk | Body    |
| cg00678114 | SGSM2    | chr17 | 0.004665825 | + T2D risk | Body    |
| cg24902461 | GRK5     | chr10 | 0.004765547 | - T2D risk | Body    |
| cg13096859 | ATP8A2   | chr13 | 0.004841539 | - T2D risk | Body    |
| cg18126938 | RGS7     | chr1  | 0.004842185 | - T2D risk | Body    |
| cg09265397 | NOTCH3   | chr19 | 0.004867554 | - T2D risk | Body    |
| cg26134124 | TOP2A    | chr17 | 0.004891576 | + T2D risk | TSS1500 |
| cg00172488 | TMEM131  | chr2  | 0.004951332 | + T2D risk | Body    |
| cg19734201 | UBE2K    | chr4  | 0.004962651 | - T2D risk | TSS200  |
| cg21269164 | ST20     | chr15 | 0.004978811 | - T2D risk | TSS200  |
| cg21269164 | ST20     | chr15 | 0.004978811 | - T2D risk | Body    |
| cg10338829 | ASXL2    | chr2  | 0.005009175 | - T2D risk | Body    |
| cg20511056 | TMEM59   | chr1  | 0.005132982 | - T2D risk | TSS1500 |
| cg03416665 | PDLIM5   | chr4  | 0.005223576 | - T2D risk | 5'UTR   |
| cg03416665 | PDLIM5   | chr4  | 0.005223576 | - T2D risk | Body    |
| cg23098052 | SCARB2   | chr4  | 0.005272136 | - T2D risk | Body    |
| cg03874197 | RANBP17  | chr5  | 0.005283595 | + T2D risk | Body    |
| cg11588103 | ZHX2     | chr8  | 0.005290043 | + T2D risk | 5'UTR   |
| cg03245195 | ARL8B    | chr3  | 0.005322025 | + T2D risk | Body    |
| cg18974117 | ATRN1    | chr10 | 0.005338773 | - T2D risk | Body    |
| cg11594811 | CADM1    | chr11 | 0.005366298 | - T2D risk | Body    |
| cg06351796 | ATXN1    | chr6  | 0.005372827 | - T2D risk | 5'UTR   |
| cg15032909 | RANBP17  | chr5  | 0.005455446 | - T2D risk | 3'UTR   |
| cg07584692 | CLEC16A  | chr16 | 0.005462121 | - T2D risk | Body    |
| cg16675193 | USP29    | chr19 | 0.005474545 | - T2D risk | TSS1500 |
| cg24509104 | PDE3A    | chr12 | 0.005554818 | - T2D risk | 3'UTR   |
| cg18227776 | NCOA2    | chr8  | 0.005592484 | + T2D risk | Body    |
| cg20883943 | DDC      | chr7  | 0.005598447 | - T2D risk | 5'UTR   |
| cg23098114 | KDM4B    | chr19 | 0.005637612 | + T2D risk | 5'UTR   |
| cg12107278 | TAB2     | chr6  | 0.005696056 | - T2D risk | Body    |
| cg03894975 | PTPRU    | chr1  | 0.00571503  | - T2D risk | Body    |
| cg23978242 | DIP2C    | chr10 | 0.005737457 | - T2D risk | Body    |
| cg01678580 | MGRN1    | chr16 | 0.005737906 | + T2D risk | TSS1500 |
| cg22752532 | TSC22D1  | chr13 | 0.005772852 | - T2D risk | Body    |
| cg22752532 | TSC22D1  | chr13 | 0.005772852 | - T2D risk | TSS200  |
| cg10908196 | MGRN1    | chr16 | 0.005794782 | + T2D risk | Body    |
| cg13636817 | DNAH9    | chr17 | 0.005835344 | - T2D risk | Body    |
| cg17148755 | CUX1     | chr7  | 0.005840146 | + T2D risk | Body    |
| cg14416337 | CDK8     | chr13 | 0.005891572 | + T2D risk | TSS1500 |
| cg22549984 | DIP2C    | chr10 | 0.005898339 | + T2D risk | Body    |
| cg20515302 | MEIS2    | chr15 | 0.005902086 | + T2D risk | 5'UTR   |
| cg20515302 | MEIS2    | chr15 | 0.005902086 | + T2D risk | 1stExon |
| cg20515302 | MEIS2    | chr15 | 0.005902086 | + T2D risk | Body    |
| cg20515302 | MEIS2    | chr15 | 0.005902086 | + T2D risk | TSS1500 |
| cg24004414 | CLOCK    | chr4  | 0.005905888 | + T2D risk | 5'UTR   |
| cg09571420 | CNTNAP2  | chr7  | 0.005997844 | - T2D risk | TSS1500 |
| cg12569592 | ATXN1    | chr6  | 0.006020625 | + T2D risk | 5'UTR   |
| cg24886785 | ERC2     | chr3  | 0.006051361 | + T2D risk | 3'UTR   |
| cg21751491 | SMG7     | chr1  | 0.00606642  | - T2D risk | TSS200  |
| cg07689561 | TAB2     | chr6  | 0.006120769 | - T2D risk | 5'UTR   |
| cg07689561 | TAB2     | chr6  | 0.006120769 | - T2D risk | Body    |
| cg12111758 | CUX2     | chr12 | 0.006201607 | - T2D risk | Body    |
| cg00506389 | ERC2     | chr3  | 0.006237414 | + T2D risk | 3'UTR   |
| cg26673396 | ST20     | chr15 | 0.006239926 | + T2D risk | 5'UTR   |
| cg16605751 | NCOA7    | chr6  | 0.006243233 | - T2D risk | 5'UTR   |
| cg05203917 | PDE8A    | chr15 | 0.006254277 | + T2D risk | Body    |
| cg14720888 | CNTROB   | chr17 | 0.006259742 | - T2D risk | TSS200  |
| cg20406576 | PRKAG2   | chr7  | 0.00628517  | + T2D risk | Body    |
| cg24065957 | ARL15    | chr5  | 0.006295462 | - T2D risk | Body    |
| cg23680523 | TPCN1    | chr12 | 0.006360328 | + T2D risk | Body    |
| cg25819424 | RAP1GAP2 | chr17 | 0.006366161 | + T2D risk | Body    |
| cg04761980 | TTC28    | chr22 | 0.006389686 | - T2D risk | Body    |
| cg23000765 | GALK2    | chr15 | 0.006422742 | - T2D risk | Body    |
| cg23000765 | GALK2    | chr15 | 0.006422742 | - T2D risk | TSS200  |
| cg13492133 | SMG7     | chr1  | 0.006527223 | + T2D risk | Body    |



|            |           |       |             |            |         |
|------------|-----------|-------|-------------|------------|---------|
| cg06986184 | PDE7A     | chr8  | 0.006546778 | + T2D risk | 3'UTR   |
| cg05994652 | ULK4      | chr3  | 0.006606282 | + T2D risk | Body    |
| cg27130075 | COL4A1    | chr13 | 0.006781246 | + T2D risk | Body    |
| cg21982700 | POC1B     | chr12 | 0.006808293 | + T2D risk | TSS200  |
| cg21982700 | POC1B     | chr12 | 0.006808293 | + T2D risk | TSS1500 |
| cg03325406 | GLG1      | chr16 | 0.006809804 | + T2D risk | TSS200  |
| cg13762595 | PHACTR1   | chr6  | 0.006818572 | - T2D risk | Body    |
| cg09409594 | ATXN1     | chr6  | 0.006877008 | + T2D risk | 5'UTR   |
| cg23511374 | NUP98     | chr11 | 0.006915526 | - T2D risk | TSS200  |
| cg21929771 | PTPRU     | chr1  | 0.006986247 | - T2D risk | Body    |
| cg17161697 | ASH1L     | chr1  | 0.006990552 | + T2D risk | Body    |
| cg26690956 | SLIT3     | chr5  | 0.007030568 | - T2D risk | Body    |
| cg05134183 | GLG1      | chr16 | 0.007063329 | + T2D risk | 3'UTR   |
| cg05134183 | GLG1      | chr16 | 0.007063329 | + T2D risk | Body    |
| cg11803871 | ADCY5     | chr3  | 0.007066305 | - T2D risk | Body    |
| cg24734184 | PPP1R12A  | chr12 | 0.007072754 | + T2D risk | Body    |
| cg03794759 | SPOCK1    | chr5  | 0.007081625 | - T2D risk | Body    |
| cg13969273 | NQO1      | chr16 | 0.007130375 | + T2D risk | TSS200  |
| cg08491843 | ZHX2      | chr8  | 0.00713649  | + T2D risk | 5'UTR   |
| cg16718760 | ERC2      | chr3  | 0.007232838 | - T2D risk | Body    |
| cg10448724 | DIP2C     | chr10 | 0.007241279 | - T2D risk | Body    |
| cg01962428 | DKK2      | chr4  | 0.007272804 | - T2D risk | 1stExon |
| cg01962428 | DKK2      | chr4  | 0.007272804 | - T2D risk | 5'UTR   |
| cg11955954 | RAP1GAP2  | chr17 | 0.007324665 | - T2D risk | Body    |
| cg18500826 | MDM1      | chr12 | 0.007393809 | - T2D risk | Body    |
| cg10958924 | MEIS2     | chr15 | 0.007417543 | - T2D risk | 5'UTR   |
| cg10958924 | MEIS2     | chr15 | 0.007417543 | - T2D risk | 1stExon |
| cg10958924 | MEIS2     | chr15 | 0.007417543 | - T2D risk | Body    |
| cg10958924 | MEIS2     | chr15 | 0.007417543 | - T2D risk | TSS1500 |
| cg17160384 | CCNB1     | chr5  | 0.007439673 | - T2D risk | TSS200  |
| cg00793166 | ATP6V1A   | chr3  | 0.007440874 | - T2D risk | 5'UTR   |
| cg11075883 | CNTNAP2   | chr7  | 0.007447529 | - T2D risk | Body    |
| cg09873502 | ATP6V1H   | chr8  | 0.00749291  | - T2D risk | Body    |
| cg10083889 | CLEC16A   | chr16 | 0.007514434 | + T2D risk | Body    |
| cg07781445 | RAP1GAP2  | chr17 | 0.007517485 | + T2D risk | Body    |
| cg11553068 | PACS2     | chr14 | 0.007544829 | - T2D risk | 1stExon |
| cg11553068 | PACS2     | chr14 | 0.007544829 | - T2D risk | 5'UTR   |
| cg10090769 | MGRN1     | chr16 | 0.007564295 | + T2D risk | 3'UTR   |
| cg15862380 | DIP2C     | chr10 | 0.007607121 | + T2D risk | Body    |
| cg11806203 | EVI5      | chr1  | 0.007648912 | + T2D risk | Body    |
| cg19423197 | ATP6V1A   | chr3  | 0.0076568   | - T2D risk | TSS1500 |
| cg21851032 | PRKCE     | chr2  | 0.007734647 | + T2D risk | Body    |
| cg05661869 | DIP2C     | chr10 | 0.00782938  | - T2D risk | Body    |
| cg02790021 | SEZ6L     | chr22 | 0.007838159 | - T2D risk | TSS200  |
| cg09872841 | ITPKB     | chr1  | 0.00785932  | + T2D risk | Body    |
| cg10055059 | NOL4      | chr18 | 0.007886349 | - T2D risk | Body    |
| cg23799375 | PACRG     | chr6  | 0.007995603 | - T2D risk | TSS200  |
| cg23799375 | PACRG     | chr6  | 0.007995603 | - T2D risk | TSS1500 |
| cg00856223 | TTC28     | chr22 | 0.007999044 | - T2D risk | Body    |
| cg06397510 | PTP4A2    | chr1  | 0.00802195  | - T2D risk | 5'UTR   |
| cg06397510 | PTP4A2    | chr1  | 0.00802195  | - T2D risk | 1stExon |
| cg15255263 | CUX1      | chr7  | 0.008100965 | + T2D risk | Body    |
| cg04959674 | MMS19     | chr10 | 0.008110411 | - T2D risk | Body    |
| cg19062098 | HNRNPA2B1 | chr7  | 0.008148214 | + T2D risk | Body    |
| cg14124980 | RBM4      | chr11 | 0.008227208 | + T2D risk | TSS1500 |
| cg14105047 | PDLIM5    | chr4  | 0.008257208 | - T2D risk | TSS1500 |
| cg22287067 | NOL4      | chr18 | 0.008308784 | - T2D risk | TSS200  |
| cg08005692 | ASH1L     | chr1  | 0.008336224 | + T2D risk | 5'UTR   |
| cg02763019 | LCA5      | chr6  | 0.008348813 | - T2D risk | 5'UTR   |
| cg17035311 | INPP4A    | chr2  | 0.008356075 | + T2D risk | Body    |
| cg01570055 | ST8SIA1   | chr12 | 0.008464951 | + T2D risk | 3'UTR   |
| cg27456274 | ANKHD1    | chr5  | 0.008468293 | - T2D risk | 5'UTR   |
| cg27456274 | ANKHD1    | chr5  | 0.008468293 | - T2D risk | 1stExon |
| cg02174680 | RGS7      | chr1  | 0.00847966  | - T2D risk | TSS200  |
| cg11222527 | ITPKB     | chr1  | 0.008498374 | + T2D risk | TSS200  |
| cg07594478 | ARIH1     | chr15 | 0.008642714 | - T2D risk | TSS200  |
| cg13590863 | GLG1      | chr16 | 0.008689471 | - T2D risk | Body    |
| cg06439603 | DIP2C     | chr10 | 0.008739338 | - T2D risk | Body    |
| cg03505179 | PRKD1     | chr14 | 0.008787586 | + T2D risk | Body    |
| cg26132449 | TPCN1     | chr12 | 0.008788732 | - T2D risk | Body    |



|            |           |       |             |            |         |
|------------|-----------|-------|-------------|------------|---------|
| cg17274632 | GRK5      | chr10 | 0.008788935 | + T2D risk | Body    |
| cg24312719 | EVI5      | chr1  | 0.008955478 | - T2D risk | Body    |
| cg26886089 | CUX1      | chr7  | 0.008968191 | - T2D risk | Body    |
| cg05702952 | PDK1      | chr2  | 0.009002219 | + T2D risk | 1stExon |
| cg17140307 | EVI5      | chr1  | 0.009031365 | - T2D risk | Body    |
| cg21281892 | LYVE1     | chr11 | 0.009040953 | - T2D risk | TSS200  |
| cg17038116 | ASH1L     | chr1  | 0.009046406 | - T2D risk | TSS1500 |
| cg01681049 | SCAF8     | chr6  | 0.009114718 | - T2D risk | Body    |
| cg19313015 | CHFR      | chr12 | 0.009122229 | - T2D risk | TSS200  |
| cg04238959 | YWHAQ     | chr2  | 0.009128682 | - T2D risk | Body    |
| cg10739684 | PHF21A    | chr11 | 0.009132542 | + T2D risk | TSS1500 |
| cg25432913 | PACS2     | chr14 | 0.00915193  | - T2D risk | 5'UTR   |
| cg21995039 | NF1       | chr17 | 0.009210737 | - T2D risk | Body    |
| cg10037579 | PRKAG2    | chr7  | 0.009254969 | + T2D risk | Body    |
| cg00385906 | MAN1A2    | chr1  | 0.009292215 | - T2D risk | 1stExon |
| cg00385906 | MAN1A2    | chr1  | 0.009292215 | - T2D risk | 5'UTR   |
| cg19191594 | AGPAT3    | chr21 | 0.009351094 | + T2D risk | 5'UTR   |
| cg00956010 | SGSM2     | chr17 | 0.009370592 | - T2D risk | TSS1500 |
| cg13547577 | PRKCE     | chr2  | 0.009407179 | - T2D risk | TSS200  |
| cg08486948 | PRKCE     | chr2  | 0.009423927 | + T2D risk | Body    |
| cg00877966 | IFT74     | chr9  | 0.009452683 | - T2D risk | 5'UTR   |
| cg00877966 | IFT74     | chr9  | 0.009452683 | - T2D risk | TSS200  |
| cg05209405 | NCOA7     | chr6  | 0.009474012 | - T2D risk | 5'UTR   |
| cg05209405 | NCOA7     | chr6  | 0.009474012 | - T2D risk | Body    |
| cg26958426 | NUP98     | chr11 | 0.009488816 | + T2D risk | Body    |
| cg26958426 | NUP98     | chr11 | 0.009488816 | + T2D risk | ExonBnd |
| cg15767155 | ATP6V1H   | chr8  | 0.009582786 | - T2D risk | TSS200  |
| cg15767155 | ATP6V1H   | chr8  | 0.009582786 | - T2D risk | 5'UTR   |
| cg15767155 | ATP6V1H   | chr8  | 0.009582786 | - T2D risk | 1stExon |
| cg24274982 | HNRNPA2B1 | chr7  | 0.009668569 | - T2D risk | TSS200  |
| cg15532138 | CNTROB    | chr17 | 0.009678249 | - T2D risk | Body    |
| cg23276187 | SGSM2     | chr17 | 0.009700044 | - T2D risk | TSS1500 |
| cg11731414 | ATXN1     | chr6  | 0.009718634 | + T2D risk | 5'UTR   |
| cg23733029 | TJP1      | chr15 | 0.009737155 | - T2D risk | Body    |
| cg08122691 | SCAF11    | chr12 | 0.009741984 | - T2D risk | 5'UTR   |
| cg11394115 | ANK3      | chr10 | 0.009748537 | - T2D risk | 1stExon |
| cg11394115 | ANK3      | chr10 | 0.009748537 | - T2D risk | 5'UTR   |
| cg27237834 | DNAJC13   | chr3  | 0.009771705 | - T2D risk | Body    |
| cg24494587 | COL4A1    | chr13 | 0.009778563 | + T2D risk | Body    |
| cg21227845 | RSF1      | chr11 | 0.009787686 | - T2D risk | TSS200  |
| cg14739926 | RBBP6     | chr16 | 0.009852285 | + T2D risk | 3'UTR   |
| cg25418947 | CALD1     | chr7  | 0.009868578 | - T2D risk | Body    |
| cg23336452 | DIP2C     | chr10 | 0.009873616 | + T2D risk | Body    |
| cg00573191 | DNAJC13   | chr3  | 0.00992477  | - T2D risk | Body    |
| cg10721149 | SCGN      | chr6  | 0.00993228  | - T2D risk | TSS200  |
| cg01320657 | TSGA10    | chr2  | 0.009999317 | - T2D risk | TSS1500 |
| cg18971502 | RCAN2     | chr6  | 0.010010364 | - T2D risk | 3'UTR   |
| cg05192326 | KIAA1217  | chr10 | 0.010267053 | - T2D risk | 5'UTR   |
| cg06553422 | WIZ       | chr19 | 0.010294559 | - T2D risk | 5'UTR   |
| cg20634733 | CNTROB    | chr17 | 0.010300745 | - T2D risk | TSS200  |
| cg05207834 | SPAG9     | chr17 | 0.01033824  | - T2D risk | TSS1500 |
| cg23837756 | ITGB1     | chr10 | 0.01034482  | - T2D risk | TSS200  |
| cg23837756 | ITGB1     | chr10 | 0.01034482  | - T2D risk | TSS1500 |
| cg06540331 | ACTN4     | chr19 | 0.010358664 | - T2D risk | Body    |
| cg06540331 | ACTN4     | chr19 | 0.010358664 | - T2D risk | ExonBnd |
| cg04848426 | UXS1      | chr2  | 0.010373127 | - T2D risk | Body    |
| cg05931940 | CLASP2    | chr3  | 0.01040296  | + T2D risk | TSS200  |
| cg07091346 | CHID1     | chr11 | 0.010505961 | + T2D risk | Body    |
| cg05235126 | TTC28     | chr22 | 0.010538662 | - T2D risk | Body    |
| cg10396491 | ZHX2      | chr8  | 0.01053938  | + T2D risk | 5'UTR   |
| cg10180367 | KIAA0355  | chr19 | 0.010611865 | - T2D risk | Body    |
| cg22244725 | SPOCK1    | chr5  | 0.010614202 | - T2D risk | Body    |
| cg06571425 | CUX2      | chr12 | 0.010664265 | + T2D risk | Body    |
| cg01454124 | TENM2     | chr5  | 0.01070171  | - T2D risk | Body    |
| cg17253835 | DACH1     | chr13 | 0.010809252 | + T2D risk | Body    |
| cg01209914 | PTPRU     | chr1  | 0.010849381 | + T2D risk | Body    |
| cg23688299 | POC1B     | chr12 | 0.010854255 | + T2D risk | Body    |
| cg04578520 | PCYT1A    | chr3  | 0.01089141  | - T2D risk | TSS1500 |
| cg08370325 | NCOR1     | chr17 | 0.010949912 | - T2D risk | Body    |
| cg16604801 | RAP1GAP2  | chr17 | 0.011094504 | + T2D risk | Body    |



|            |          |       |             |            |         |
|------------|----------|-------|-------------|------------|---------|
| cg01043383 | USP29    | chr19 | 0.011099895 | - T2D risk | TSS1500 |
| cg23564442 | PACS2    | chr14 | 0.011266352 | + T2D risk | Body    |
| cg25036166 | ROBO2    | chr3  | 0.011301883 | - T2D risk | 5'UTR   |
| cg25036166 | ROBO2    | chr3  | 0.011301883 | - T2D risk | ExonBnd |
| cg25036166 | ROBO2    | chr3  | 0.011301883 | - T2D risk | Body    |
| cg01850561 | ROBO2    | chr3  | 0.011377746 | + T2D risk | Body    |
| cg03813721 | PPP1R12A | chr12 | 0.011442819 | - T2D risk | Body    |
| cg03813721 | PPP1R12A | chr12 | 0.011442819 | - T2D risk | TSS1500 |
| cg27032197 | CHKA     | chr11 | 0.011447858 | + T2D risk | TSS1500 |
| cg06971761 | AGPAT3   | chr21 | 0.011448315 | + T2D risk | Body    |
| cg00344870 | ATXN1    | chr6  | 0.0114582   | - T2D risk | 5'UTR   |
| cg14557268 | NF1      | chr17 | 0.011475312 | - T2D risk | Body    |
| cg16788172 | DIP2C    | chr10 | 0.011494618 | + T2D risk | Body    |
| cg16002826 | ADCY5    | chr3  | 0.011496037 | + T2D risk | Body    |
| cg23893202 | GLG1     | chr16 | 0.011506675 | - T2D risk | Body    |
| cg09983370 | ATP8A1   | chr4  | 0.011528705 | - T2D risk | Body    |
| cg11230847 | IFT74    | chr9  | 0.011541761 | - T2D risk | 5'UTR   |
| cg04373034 | LMCD1    | chr3  | 0.011610569 | - T2D risk | Body    |
| cg17685679 | ULK4     | chr3  | 0.011652829 | - T2D risk | TSS200  |
| cg09169291 | ST6GAL1  | chr3  | 0.011660336 | + T2D risk | 5'UTR   |
| cg22030770 | ATP6V1A  | chr3  | 0.011744751 | - T2D risk | TSS1500 |
| cg04967789 | ERC2     | chr3  | 0.011779265 | - T2D risk | 3'UTR   |
| cg19332831 | GLG1     | chr16 | 0.01179496  | + T2D risk | Body    |
| cg01271805 | ERC2     | chr3  | 0.011799223 | - T2D risk | 3'UTR   |
| cg21118091 | LAMA4    | chr6  | 0.011805275 | - T2D risk | Body    |
| cg25113607 | ATRNL1   | chr10 | 0.011813043 | + T2D risk | Body    |
| cg02909097 | RAP1GAP2 | chr17 | 0.011848872 | + T2D risk | Body    |
| cg00151788 | TSGA10   | chr2  | 0.011859994 | - T2D risk | 5'UTR   |
| cg23953684 | TENM2    | chr5  | 0.0119089   | + T2D risk | Body    |
| cg16152137 | NF1      | chr17 | 0.011992328 | - T2D risk | Body    |
| cg21265072 | RNF157   | chr17 | 0.0121371   | + T2D risk | Body    |
| cg06081869 | MYO6     | chr6  | 0.01214891  | - T2D risk | Body    |
| cg02100997 | PTPRU    | chr1  | 0.01222446  | - T2D risk | Body    |
| cg16886828 | KDM4B    | chr19 | 0.012233543 | + T2D risk | 5'UTR   |
| cg23599951 | ERC2     | chr3  | 0.012355125 | + T2D risk | Body    |
| cg23580591 | PRKAG2   | chr7  | 0.012369383 | + T2D risk | Body    |
| cg02146374 | CNTROB   | chr17 | 0.012372576 | - T2D risk | TSS1500 |
| cg02917536 | TAB2     | chr6  | 0.012408008 | - T2D risk | 5'UTR   |
| cg02917536 | TAB2     | chr6  | 0.012408008 | - T2D risk | Body    |
| cg04461691 | RNF157   | chr17 | 0.012421339 | + T2D risk | TSS1500 |
| cg24236839 | KDM4B    | chr19 | 0.012425208 | - T2D risk | Body    |
| cg21818602 | SUB1     | chr5  | 0.012453925 | - T2D risk | 5'UTR   |
| cg09717402 | LAP3     | chr4  | 0.012500764 | + T2D risk | Body    |
| cg02926622 | PLAGL1   | chr6  | 0.012533109 | - T2D risk | TSS1500 |
| cg21216828 | WIZ      | chr19 | 0.01256054  | - T2D risk | 5'UTR   |
| cg06639875 | GRK5     | chr10 | 0.01257963  | + T2D risk | Body    |
| cg15170644 | SSBP2    | chr5  | 0.012699257 | + T2D risk | Body    |
| cg18120564 | COL4A1   | chr13 | 0.01275358  | + T2D risk | Body    |
| cg26205341 | USP53    | chr4  | 0.012756229 | - T2D risk | TSS200  |
| cg14090880 | MAST1    | chr19 | 0.012784696 | + T2D risk | Body    |
| cg13802740 | YWHAQ    | chr2  | 0.012841988 | - T2D risk | 5'UTR   |
| cg00465686 | PDE7A    | chr8  | 0.012856762 | + T2D risk | TSS200  |
| cg00465686 | PDE7A    | chr8  | 0.012856762 | + T2D risk | Body    |
| cg24059026 | SMG7     | chr1  | 0.012937781 | - T2D risk | TSS200  |
| cg05951360 | ZRANB1   | chr10 | 0.012979111 | + T2D risk | Body    |
| cg18121281 | RCAN2    | chr6  | 0.01299463  | + T2D risk | TSS1500 |
| cg18121281 | RCAN2    | chr6  | 0.01299463  | + T2D risk | TSS200  |
| cg03421485 | DLL4     | chr15 | 0.013017037 | - T2D risk | 1stExon |
| cg03421485 | DLL4     | chr15 | 0.013017037 | - T2D risk | 5'UTR   |
| cg10601230 | PACRG    | chr6  | 0.013022423 | - T2D risk | Body    |
| cg16976419 | NF1      | chr17 | 0.013047957 | + T2D risk | Body    |
| cg14311251 | COL4A1   | chr13 | 0.01306886  | - T2D risk | Body    |
| cg08628601 | ARPP19   | chr15 | 0.013070268 | + T2D risk | TSS200  |
| cg24571899 | ANK3     | chr10 | 0.013079171 | - T2D risk | Body    |
| cg11979752 | PRMT3    | chr11 | 0.013207067 | - T2D risk | 5'UTR   |
| cg11979752 | PRMT3    | chr11 | 0.013207067 | - T2D risk | 1stExon |
| cg20655035 | UXS1     | chr2  | 0.013236105 | - T2D risk | Body    |
| cg15905329 | CALD1    | chr7  | 0.013311642 | - T2D risk | Body    |
| cg15905329 | CALD1    | chr7  | 0.013311642 | - T2D risk | TSS1500 |
| cg13984373 | TMEM131  | chr2  | 0.013344935 | - T2D risk | Body    |



|            |          |       |             |            |         |
|------------|----------|-------|-------------|------------|---------|
| cg06900493 | AGPAT3   | chr21 | 0.013346805 | + T2D risk | 5'UTR   |
| cg05287064 | MGRN1    | chr16 | 0.013413824 | + T2D risk | Body    |
| cg05680085 | RHBDD1   | chr2  | 0.013467412 | - T2D risk | TSS200  |
| cg00934017 | NGF      | chr1  | 0.013522739 | - T2D risk | 5'UTR   |
| cg27569742 | WIZ      | chr19 | 0.013533836 | - T2D risk | 5'UTR   |
| cg14916213 | RBM4     | chr11 | 0.01361617  | - T2D risk | TSS1500 |
| cg00699794 | CEP126   | chr11 | 0.013666545 | + T2D risk | Body    |
| cg15262884 | PLAGL1   | chr6  | 0.013696368 | + T2D risk | 5'UTR   |
| cg07808835 | GGPS1    | chr1  | 0.013750305 | - T2D risk | TSS1500 |
| cg14284780 | WWP2     | chr16 | 0.013809073 | + T2D risk | Body    |
| cg23241628 | RTN4     | chr2  | 0.013811925 | - T2D risk | TSS1500 |
| cg11945022 | DYNC111  | chr7  | 0.013815386 | + T2D risk | 5'UTR   |
| cg15923025 | EIF4EBP3 | chr5  | 0.013845962 | - T2D risk | TSS200  |
| cg15490944 | FAM160A1 | chr4  | 0.013887219 | - T2D risk | TSS200  |
| cg25266959 | PICALM   | chr11 | 0.01389669  | + T2D risk | 1stExon |
| cg25266959 | PICALM   | chr11 | 0.01389669  | + T2D risk | TSS1500 |
| cg25266959 | PICALM   | chr11 | 0.01389669  | + T2D risk | 5'UTR   |
| cg09172820 | CRYL1    | chr13 | 0.01389741  | + T2D risk | Body    |
| cg25543749 | PACS2    | chr14 | 0.013930172 | + T2D risk | Body    |
| cg03819286 | MGRN1    | chr16 | 0.013930363 | + T2D risk | TSS1500 |
| cg12620935 | ARL15    | chr5  | 0.014039319 | + T2D risk | Body    |
| cg11337765 | ATP6V1A  | chr3  | 0.014076084 | - T2D risk | TSS1500 |
| cg10988169 | ATP6V1H  | chr8  | 0.014143055 | - T2D risk | Body    |
| cg14097577 | NGLY1    | chr3  | 0.014169365 | - T2D risk | 1stExon |
| cg14097577 | NGLY1    | chr3  | 0.014169365 | - T2D risk | Body    |
| cg14097577 | NGLY1    | chr3  | 0.014169365 | - T2D risk | 5'UTR   |
| cg02633409 | KDM4B    | chr19 | 0.014207971 | + T2D risk | Body    |
| cg10258953 | MGRN1    | chr16 | 0.014212395 | - T2D risk | Body    |
| cg00504410 | MGRN1    | chr16 | 0.01421998  | + T2D risk | Body    |
| cg23629707 | PRKCE    | chr2  | 0.014270954 | - T2D risk | Body    |
| cg10223066 | CHFR     | chr12 | 0.014286836 | - T2D risk | TSS1500 |
| cg09757353 | GRK5     | chr10 | 0.014305483 | + T2D risk | Body    |
| cg21726913 | PDE8A    | chr15 | 0.014310059 | - T2D risk | TSS1500 |
| cg17090611 | ZDHHC2   | chr8  | 0.014310341 | - T2D risk | Body    |
| cg00583022 | NUF2     | chr1  | 0.014437014 | - T2D risk | Body    |
| cg14282393 | RSF1     | chr11 | 0.014456114 | - T2D risk | Body    |
| cg14282393 | RSF1     | chr11 | 0.014456114 | - T2D risk | ExonBnd |
| cg15646900 | ATP6V1H  | chr8  | 0.014461348 | - T2D risk | 5'UTR   |
| cg15646900 | ATP6V1H  | chr8  | 0.014461348 | - T2D risk | TSS200  |
| cg15646900 | ATP6V1H  | chr8  | 0.014461348 | - T2D risk | 1stExon |
| cg07793807 | ITPKB    | chr1  | 0.014493738 | - T2D risk | Body    |
| cg22740925 | DNAH9    | chr17 | 0.01453264  | - T2D risk | TSS1500 |
| cg22740925 | DNAH9    | chr17 | 0.01453264  | - T2D risk | Body    |
| cg03861105 | RHOQ     | chr2  | 0.014726109 | - T2D risk | Body    |
| cg12326440 | DIP2C    | chr10 | 0.014843572 | + T2D risk | Body    |
| cg08260760 | ATRN     | chr20 | 0.014890598 | - T2D risk | TSS200  |
| cg10208640 | PHACTR1  | chr6  | 0.014893627 | + T2D risk | Body    |
| cg05456250 | DYNC112  | chr2  | 0.014939443 | + T2D risk | Body    |
| cg02097532 | ERC2     | chr3  | 0.01494909  | + T2D risk | 3'UTR   |
| cg15757430 | TMEM219  | chr16 | 0.014958801 | + T2D risk | 5'UTR   |
| cg22395253 | SRPK2    | chr7  | 0.014963064 | + T2D risk | Body    |
| cg26029744 | NUF2     | chr1  | 0.014978696 | - T2D risk | TSS200  |
| cg14931586 | PICALM   | chr11 | 0.015038946 | - T2D risk | TSS1500 |
| cg05166989 | FAM160A1 | chr4  | 0.015120197 | - T2D risk | TSS1500 |
| cg13230023 | ARL8B    | chr3  | 0.01518438  | - T2D risk | TSS1500 |
| cg07088328 | DDHD2    | chr8  | 0.015196386 | - T2D risk | 5'UTR   |
| cg07088328 | DDHD2    | chr8  | 0.015196386 | - T2D risk | 1stExon |
| cg07088328 | DDHD2    | chr8  | 0.015196386 | - T2D risk | TSS1500 |
| cg06055220 | TSC22D1  | chr13 | 0.015260905 | + T2D risk | Body    |
| cg04338788 | SEMA3G   | chr3  | 0.015263358 | - T2D risk | Body    |
| cg05786622 | ATXN1    | chr6  | 0.015274515 | - T2D risk | 5'UTR   |
| cg00839802 | MAN1A1   | chr6  | 0.015306395 | - T2D risk | TSS1500 |
| cg05120042 | TOP2A    | chr17 | 0.015380952 | - T2D risk | Body    |
| cg20516364 | CHID1    | chr11 | 0.015480082 | + T2D risk | Body    |
| cg03555487 | PACS2    | chr14 | 0.015489517 | - T2D risk | Body    |
| cg03353560 | ITGA1    | chr5  | 0.015507176 | - T2D risk | 3'UTR   |
| cg04398307 | LAP3     | chr4  | 0.015549786 | - T2D risk | TSS200  |
| cg03168818 | MGRN1    | chr16 | 0.015576607 | + T2D risk | Body    |
| cg25406344 | GLG1     | chr16 | 0.015597042 | + T2D risk | Body    |
| cg15734437 | RBBP6    | chr16 | 0.015721257 | - T2D risk | 5'UTR   |



|            |                 |       |             |            |         |
|------------|-----------------|-------|-------------|------------|---------|
| cg15734437 | <i>RBBP6</i>    | chr16 | 0.015721257 | - T2D risk | 1stExon |
| cg14150743 | <i>ST20</i>     | chr15 | 0.015772155 | - T2D risk | TSS200  |
| cg14150743 | <i>ST20</i>     | chr15 | 0.015772155 | - T2D risk | Body    |
| cg20565652 | <i>PPFIBP1</i>  | chr12 | 0.015779444 | + T2D risk | 5'UTR   |
| cg15788149 | <i>MET</i>      | chr7  | 0.015822254 | - T2D risk | TSS200  |
| cg02875272 | <i>IFT74</i>    | chr9  | 0.015848311 | - T2D risk | TSS200  |
| cg02875272 | <i>IFT74</i>    | chr9  | 0.015848311 | - T2D risk | 5'UTR   |
| cg26130139 | <i>RHBDD1</i>   | chr2  | 0.015861304 | - T2D risk | Body    |
| cg17863337 | <i>PRKACB</i>   | chr1  | 0.015955693 | - T2D risk | Body    |
| cg17863337 | <i>PRKACB</i>   | chr1  | 0.015955693 | - T2D risk | TSS200  |
| cg15713378 | <i>DIP2C</i>    | chr10 | 0.01596382  | - T2D risk | Body    |
| cg22991565 | <i>CUX1</i>     | chr7  | 0.015966672 | + T2D risk | Body    |
| cg02788102 | <i>CADM1</i>    | chr11 | 0.015987941 | + T2D risk | Body    |
| cg19374317 | <i>GAD1</i>     | chr2  | 0.016002777 | - T2D risk | 5'UTR   |
| cg17466151 | <i>PACS1</i>    | chr11 | 0.016087716 | + T2D risk | Body    |
| cg25102279 | <i>HMBBOX1</i>  | chr8  | 0.016208768 | - T2D risk | 5'UTR   |
| cg11226183 | <i>EVI5</i>     | chr1  | 0.01633038  | - T2D risk | Body    |
| cg06914655 | <i>AGPAT3</i>   | chr21 | 0.016348837 | + T2D risk | 5'UTR   |
| cg11206131 | <i>KDM4B</i>    | chr19 | 0.0163833   | + T2D risk | 5'UTR   |
| cg19955402 | <i>ANKHD1</i>   | chr5  | 0.016406793 | - T2D risk | TSS200  |
| cg16267162 | <i>LAMA4</i>    | chr6  | 0.016532435 | - T2D risk | 5'UTR   |
| cg07327568 | <i>CLOCK</i>    | chr4  | 0.016620501 | - T2D risk | 5'UTR   |
| cg15521264 | <i>CDH22</i>    | chr20 | 0.016695879 | + T2D risk | Body    |
| cg01351037 | <i>PDE8A</i>    | chr15 | 0.016775949 | - T2D risk | 5'UTR   |
| cg01351037 | <i>PDE8A</i>    | chr15 | 0.016775949 | - T2D risk | 1stExon |
| cg15105081 | <i>RSF1</i>     | chr11 | 0.016824862 | - T2D risk | TSS1500 |
| cg11960802 | <i>TTC28</i>    | chr22 | 0.016857196 | - T2D risk | Body    |
| cg00703798 | <i>DACH1</i>    | chr13 | 0.016917915 | - T2D risk | Body    |
| cg16895710 | <i>DLL4</i>     | chr15 | 0.016926277 | + T2D risk | TSS200  |
| cg00372940 | <i>WDR47</i>    | chr1  | 0.01695119  | - T2D risk | 5'UTR   |
| cg06552970 | <i>PACRG</i>    | chr6  | 0.017013417 | + T2D risk | Body    |
| cg04206060 | <i>IFT74</i>    | chr9  | 0.017016024 | - T2D risk | TSS200  |
| cg04206060 | <i>IFT74</i>    | chr9  | 0.017016024 | - T2D risk | 5'UTR   |
| cg21117678 | <i>CUX1</i>     | chr7  | 0.017072043 | - T2D risk | TSS1500 |
| cg01933801 | <i>ATP6V1H</i>  | chr8  | 0.017126532 | - T2D risk | Body    |
| cg26296928 | <i>RNF217</i>   | chr6  | 0.017233299 | - T2D risk | Body    |
| cg21393846 | <i>RET</i>      | chr10 | 0.017239406 | - T2D risk | Body    |
| cg06105681 | <i>NCOR1</i>    | chr17 | 0.01725759  | - T2D risk | TSS200  |
| cg06297677 | <i>TENM2</i>    | chr5  | 0.017411472 | - T2D risk | Body    |
| cg12575809 | <i>RGS7</i>     | chr1  | 0.017438401 | - T2D risk | Body    |
| cg12967395 | <i>PPFIBP1</i>  | chr12 | 0.017514399 | - T2D risk | TSS200  |
| cg26394825 | <i>CHFR</i>     | chr12 | 0.017528896 | - T2D risk | TSS1500 |
| cg01975373 | <i>PDE7A</i>    | chr8  | 0.017542338 | - T2D risk | Body    |
| cg26336594 | <i>FAM160A1</i> | chr4  | 0.017548585 | - T2D risk | TSS200  |
| cg04813899 | <i>DIP2C</i>    | chr10 | 0.017575564 | + T2D risk | Body    |
| cg19541697 | <i>ASXL2</i>    | chr2  | 0.017591698 | - T2D risk | Body    |
| cg07795928 | <i>ITPKB</i>    | chr1  | 0.017629677 | - T2D risk | Body    |
| cg07171476 | <i>ERC2</i>     | chr3  | 0.017691288 | - T2D risk | 3'UTR   |
| cg26426732 | <i>TBC1D5</i>   | chr3  | 0.017712834 | + T2D risk | Body    |
| cg17336204 | <i>CDH22</i>    | chr20 | 0.017715299 | + T2D risk | TSS200  |
| cg16996815 | <i>INPP4A</i>   | chr2  | 0.01777114  | + T2D risk | TSS1500 |
| cg12575751 | <i>NUCB2</i>    | chr11 | 0.017849031 | + T2D risk | TSS1500 |
| cg27431247 | <i>CHKA</i>     | chr11 | 0.017867762 | - T2D risk | 1stExon |
| cg04678989 | <i>ACTN4</i>    | chr19 | 0.017887848 | - T2D risk | Body    |
| cg02298969 | <i>SEC31A</i>   | chr4  | 0.017915143 | - T2D risk | TSS200  |
| cg21266908 | <i>RCAN2</i>    | chr6  | 0.017924306 | - T2D risk | TSS1500 |
| cg19950608 | <i>APBA1</i>    | chr9  | 0.017946466 | + T2D risk | 5'UTR   |
| cg18214799 | <i>SCARB2</i>   | chr4  | 0.017974961 | - T2D risk | TSS200  |
| cg16200858 | <i>PRKACB</i>   | chr1  | 0.018015151 | + T2D risk | Body    |
| cg00349780 | <i>RAP1GAP2</i> | chr17 | 0.018036527 | + T2D risk | Body    |
| cg22215258 | <i>DYNC1I2</i>  | chr2  | 0.018059824 | + T2D risk | 5'UTR   |
| cg02370734 | <i>PDE7A</i>    | chr8  | 0.018070108 | - T2D risk | TSS1500 |
| cg02370734 | <i>PDE7A</i>    | chr8  | 0.018070108 | - T2D risk | Body    |
| cg14512491 | <i>PRKCE</i>    | chr2  | 0.018096567 | + T2D risk | Body    |
| cg03581801 | <i>LAMA4</i>    | chr6  | 0.018113123 | - T2D risk | Body    |
| cg14182461 | <i>RNF157</i>   | chr17 | 0.018138709 | + T2D risk | 3'UTR   |
| cg25365055 | <i>FBXL2</i>    | chr3  | 0.018176175 | + T2D risk | Body    |
| cg25442666 | <i>INPP4A</i>   | chr2  | 0.018279533 | + T2D risk | 5'UTR   |
| cg11166708 | <i>AGPAT3</i>   | chr21 | 0.018293774 | - T2D risk | 5'UTR   |
| cg27074678 | <i>ST6GAL1</i>  | chr3  | 0.018352988 | - T2D risk | 5'UTR   |



|            |                 |       |             |            |         |
|------------|-----------------|-------|-------------|------------|---------|
| cg26600937 | <i>PPFIBP1</i>  | chr12 | 0.018358969 | - T2D risk | 5'UTR   |
| cg04482794 | <i>ITPKB</i>    | chr1  | 0.018373836 | - T2D risk | 5'UTR   |
| cg11929382 | <i>UBL3</i>     | chr13 | 0.018384398 | - T2D risk | TSS200  |
| cg13914744 | <i>PACS2</i>    | chr14 | 0.018391874 | + T2D risk | Body    |
| cg13914744 | <i>PACS2</i>    | chr14 | 0.018391874 | + T2D risk | 5'UTR   |
| cg12188410 | <i>LAMA4</i>    | chr6  | 0.018393032 | + T2D risk | Body    |
| cg16117273 | <i>PRKD1</i>    | chr14 | 0.018469599 | - T2D risk | TSS1500 |
| cg18909295 | <i>CPLX2</i>    | chr5  | 0.018583773 | + T2D risk | TSS1500 |
| cg05908907 | <i>SLIT3</i>    | chr5  | 0.018635498 | - T2D risk | Body    |
| cg24531246 | <i>TSC22D1</i>  | chr13 | 0.018670168 | - T2D risk | 1stExon |
| cg24531246 | <i>TSC22D1</i>  | chr13 | 0.018670168 | - T2D risk | 5'UTR   |
| cg17524821 | <i>WIZ</i>      | chr19 | 0.018706278 | + T2D risk | Body    |
| cg24736834 | <i>PDE8A</i>    | chr15 | 0.018745099 | - T2D risk | TSS200  |
| cg10698984 | <i>UBL3</i>     | chr13 | 0.018835977 | - T2D risk | 1stExon |
| cg10698984 | <i>UBL3</i>     | chr13 | 0.018835977 | - T2D risk | 5'UTR   |
| cg15150883 | <i>CLASP2</i>   | chr3  | 0.018917266 | + T2D risk | Body    |
| cg14724283 | <i>PTPRU</i>    | chr1  | 0.018926699 | + T2D risk | Body    |
| cg13315721 | <i>RAP1GAP2</i> | chr17 | 0.01892916  | + T2D risk | Body    |
| cg00508575 | <i>ATP2B1</i>   | chr12 | 0.018984625 | + T2D risk | TSS1500 |
| cg14523158 | <i>CMTR1</i>    | chr6  | 0.018993657 | - T2D risk | Body    |
| cg10175712 | <i>UNC80</i>    | chr2  | 0.01903352  | + T2D risk | Body    |
| cg16105591 | <i>CPLX2</i>    | chr5  | 0.019072041 | + T2D risk | 5'UTR   |
| cg12812502 | <i>ITGB1</i>    | chr10 | 0.019175524 | - T2D risk | TSS1500 |
| cg23814172 | <i>DIP2C</i>    | chr10 | 0.019179716 | - T2D risk | Body    |
| cg02987481 | <i>NGF</i>      | chr1  | 0.019270823 | - T2D risk | TSS1500 |
| cg15092544 | <i>RAP1B</i>    | chr12 | 0.019312945 | - T2D risk | 5'UTR   |
| cg15092544 | <i>RAP1B</i>    | chr12 | 0.019312945 | - T2D risk | 1stExon |
| cg27236825 | <i>ST20</i>     | chr15 | 0.019349784 | - T2D risk | 5'UTR   |
| cg27236825 | <i>ST20</i>     | chr15 | 0.019349784 | - T2D risk | 1stExon |
| cg01098771 | <i>KDM4B</i>    | chr19 | 0.019357704 | - T2D risk | TSS200  |
| cg23976632 | <i>COX6A1</i>   | chr12 | 0.019364688 | - T2D risk | TSS200  |
| cg08928203 | <i>CHKA</i>     | chr11 | 0.019378357 | - T2D risk | 1stExon |
| cg08928203 | <i>CHKA</i>     | chr11 | 0.019378357 | - T2D risk | 5'UTR   |
| cg26660754 | <i>APC</i>      | chr5  | 0.019408394 | - T2D risk | TSS200  |
| cg20815026 | <i>NF1</i>      | chr17 | 0.019409948 | - T2D risk | TSS200  |
| cg24912450 | <i>RBM4</i>     | chr11 | 0.019410877 | - T2D risk | 5'UTR   |
| cg04709886 | <i>NPAT</i>     | chr11 | 0.019421992 | - T2D risk | TSS1500 |
| cg24105243 | <i>OXSM</i>     | chr3  | 0.019425316 | - T2D risk | TSS200  |
| cg24105243 | <i>NGLY1</i>    | chr3  | 0.019425316 | - T2D risk | TSS200  |
| cg02221838 | <i>IFT74</i>    | chr9  | 0.019430274 | - T2D risk | 5'UTR   |
| cg02221838 | <i>IFT74</i>    | chr9  | 0.019430274 | - T2D risk | TSS200  |
| cg19696123 | <i>FARSB</i>    | chr2  | 0.019439398 | - T2D risk | TSS200  |
| cg25463381 | <i>CHFR</i>     | chr12 | 0.01944191  | - T2D risk | TSS200  |
| cg13419791 | <i>ST6GAL1</i>  | chr3  | 0.019442033 | - T2D risk | TSS1500 |
| cg22907065 | <i>RHOA</i>     | chr3  | 0.019442033 | - T2D risk | 1stExon |
| cg22907065 | <i>RHOA</i>     | chr3  | 0.019442033 | - T2D risk | 5'UTR   |
| cg13962022 | <i>ANKHD1</i>   | chr5  | 0.019442033 | - T2D risk | TSS1500 |
| cg25828535 | <i>SMG7</i>     | chr1  | 0.019442033 | - T2D risk | TSS200  |
| cg16144348 | <i>SEC31A</i>   | chr4  | 0.019442033 | - T2D risk | TSS200  |
| cg08292112 | <i>UBE2K</i>    | chr4  | 0.019442033 | - T2D risk | 1stExon |
| cg06053805 | <i>NPAT</i>     | chr11 | 0.019442033 | - T2D risk | TSS200  |
| cg04574401 | <i>TSGA10</i>   | chr2  | 0.019442033 | - T2D risk | TSS1500 |
| cg27089483 | <i>PRKAG2</i>   | chr7  | 0.019442033 | - T2D risk | TSS200  |
| cg02984063 | <i>PACRG</i>    | chr6  | 0.019442033 | - T2D risk | TSS200  |
| cg02984063 | <i>PACRG</i>    | chr6  | 0.019442033 | - T2D risk | 5'UTR   |
| cg23915065 | <i>CLASP2</i>   | chr3  | 0.019442033 | - T2D risk | 5'UTR   |
| cg23915065 | <i>CLASP2</i>   | chr3  | 0.019442033 | - T2D risk | 1stExon |
| cg20963592 | <i>LAP3</i>     | chr4  | 0.019442033 | - T2D risk | 1stExon |
| cg20963592 | <i>LAP3</i>     | chr4  | 0.019442033 | - T2D risk | 5'UTR   |
| cg10024000 | <i>NF1</i>      | chr17 | 0.019442033 | - T2D risk | 1stExon |
| cg26781821 | <i>KIAA0232</i> | chr4  | 0.019442033 | - T2D risk | TSS1500 |
| cg22523077 | <i>CLOCK</i>    | chr4  | 0.019442033 | - T2D risk | 5'UTR   |
| cg07635530 | <i>EFCAB14</i>  | chr1  | 0.019442033 | - T2D risk | TSS200  |
| cg25990494 | <i>ARIH1</i>    | chr15 | 0.019442033 | - T2D risk | TSS200  |
| cg12399426 | <i>POC1B</i>    | chr12 | 0.019442033 | - T2D risk | 1stExon |
| cg12399426 | <i>POC1B</i>    | chr12 | 0.019442033 | - T2D risk | 5'UTR   |
| cg12399426 | <i>POC1B</i>    | chr12 | 0.019442033 | - T2D risk | Body    |
| cg14979019 | <i>SPAG9</i>    | chr17 | 0.019442033 | - T2D risk | 5'UTR   |
| cg14979019 | <i>SPAG9</i>    | chr17 | 0.019442033 | - T2D risk | 1stExon |
| cg05494627 | <i>PDE7A</i>    | chr8  | 0.019442033 | - T2D risk | TSS1500 |



|            |                 |       |             |            |         |
|------------|-----------------|-------|-------------|------------|---------|
| cg07979106 | <i>RAP2A</i>    | chr13 | 0.019442033 | - T2D risk | TSS200  |
| cg26928336 | <i>TMEM219</i>  | chr16 | 0.019442033 | - T2D risk | 5'UTR   |
| cg19719838 | <i>DDHD2</i>    | chr8  | 0.019442033 | - T2D risk | 5'UTR   |
| cg19719838 | <i>DDHD2</i>    | chr8  | 0.019442033 | - T2D risk | TSS200  |
| cg09476286 | <i>ASXL2</i>    | chr2  | 0.019442033 | - T2D risk | TSS200  |
| cg05039004 | <i>PTPRU</i>    | chr1  | 0.019442033 | - T2D risk | Body    |
| cg07810961 | <i>EIF4EBP3</i> | chr5  | 0.019442033 | - T2D risk | 1stExon |
| cg07810961 | <i>EIF4EBP3</i> | chr5  | 0.019442033 | - T2D risk | 5'UTR   |
| cg17428694 | <i>NUF2</i>     | chr1  | 0.019442033 | - T2D risk | TSS200  |
| cg12304817 | <i>KDM4B</i>    | chr19 | 0.019442033 | - T2D risk | TSS200  |
| cg21108232 | <i>TMEM219</i>  | chr16 | 0.019442033 | - T2D risk | TSS200  |
| cg18457775 | <i>NPAT</i>     | chr11 | 0.019442033 | - T2D risk | TSS1500 |
| cg18566984 | <i>PACRG</i>    | chr6  | 0.019442033 | - T2D risk | TSS1500 |
| cg18566984 | <i>PACRG</i>    | chr6  | 0.019442033 | - T2D risk | 5'UTR   |
| cg27262745 | <i>PKD1</i>     | chr2  | 0.019442033 | - T2D risk | Body    |
| cg27262745 | <i>PKD1</i>     | chr2  | 0.019442033 | - T2D risk | 1stExon |
| cg27262745 | <i>PKD1</i>     | chr2  | 0.019442033 | - T2D risk | 5'UTR   |
| cg07161166 | <i>PRKACB</i>   | chr1  | 0.019442033 | - T2D risk | TSS1500 |
| cg14211415 | <i>TMEM131</i>  | chr2  | 0.019442033 | - T2D risk | TSS200  |
| cg12429465 | <i>SCAF8</i>    | chr6  | 0.019442033 | - T2D risk | 1stExon |
| cg12429465 | <i>SCAF8</i>    | chr6  | 0.019442033 | - T2D risk | 5'UTR   |
| cg07174911 | <i>HMBX1</i>    | chr8  | 0.019442033 | - T2D risk | TSS1500 |
| cg15288179 | <i>SUB1</i>     | chr5  | 0.019442033 | - T2D risk | 5'UTR   |
| cg16480966 | <i>PHF21A</i>   | chr11 | 0.019442033 | - T2D risk | 5'UTR   |
| cg21070864 | <i>BIRC5</i>    | chr17 | 0.019442033 | - T2D risk | TSS200  |
| cg06219686 | <i>NF1</i>      | chr17 | 0.019442033 | - T2D risk | TSS200  |
| cg07697850 | <i>TMEM219</i>  | chr16 | 0.019442033 | - T2D risk | TSS200  |
| cg12251884 | <i>ARIH1</i>    | chr15 | 0.019442033 | - T2D risk | 5'UTR   |
| cg12251884 | <i>ARIH1</i>    | chr15 | 0.019442033 | - T2D risk | 1stExon |
| cg26606397 | <i>RAP1B</i>    | chr12 | 0.019442033 | - T2D risk | 5'UTR   |
| cg26606397 | <i>RAP1B</i>    | chr12 | 0.019442033 | - T2D risk | 1stExon |
| cg13986821 | <i>CDK8</i>     | chr13 | 0.019442033 | - T2D risk | TSS1500 |
| cg23494874 | <i>SEC31A</i>   | chr4  | 0.019442033 | - T2D risk | TSS200  |
| cg15769921 | <i>TOP2A</i>    | chr17 | 0.019442033 | - T2D risk | Body    |
| cg19901889 | <i>RAP1B</i>    | chr12 | 0.019442033 | - T2D risk | 5'UTR   |
| cg19901889 | <i>RAP1B</i>    | chr12 | 0.019442033 | - T2D risk | 1stExon |
| cg24030675 | <i>NPAT</i>     | chr11 | 0.019442033 | - T2D risk | TSS200  |
| cg00991297 | <i>ITGB1</i>    | chr10 | 0.019442033 | - T2D risk | TSS1500 |
| cg09315468 | <i>DDHD2</i>    | chr8  | 0.019442033 | - T2D risk | 5'UTR   |
| cg09315468 | <i>DDHD2</i>    | chr8  | 0.019442033 | - T2D risk | 1stExon |
| cg03783058 | <i>ATRN</i>     | chr20 | 0.019442033 | - T2D risk | TSS200  |
| cg19084174 | <i>ASXL2</i>    | chr2  | 0.019442033 | - T2D risk | TSS200  |
| cg06750635 | <i>NPAT</i>     | chr11 | 0.019442033 | - T2D risk | TSS200  |
| cg10120925 | <i>FARSB</i>    | chr2  | 0.019442033 | - T2D risk | 5'UTR   |
| cg10120925 | <i>FARSB</i>    | chr2  | 0.019442033 | - T2D risk | 1stExon |
| cg12275661 | <i>ITGB1</i>    | chr10 | 0.019442033 | - T2D risk | TSS1500 |
| cg12275661 | <i>ITGB1</i>    | chr10 | 0.019442033 | - T2D risk | 5'UTR   |
| cg12275661 | <i>ITGB1</i>    | chr10 | 0.019442033 | - T2D risk | 1stExon |
| cg12374519 | <i>TIMM23</i>   | chr10 | 0.019442033 | - T2D risk | TSS1500 |
| cg21273703 | <i>CHFR</i>     | chr12 | 0.019442033 | - T2D risk | TSS200  |
| cg14604386 | <i>MAN1A1</i>   | chr6  | 0.019442033 | - T2D risk | 5'UTR   |
| cg14604386 | <i>MAN1A1</i>   | chr6  | 0.019442033 | - T2D risk | 1stExon |
| cg15152666 | <i>PDE8A</i>    | chr15 | 0.019442033 | - T2D risk | TSS200  |
| cg26275371 | <i>ENAH</i>     | chr1  | 0.019442033 | - T2D risk | Body    |
| cg21830066 | <i>SNX4</i>     | chr3  | 0.019442033 | - T2D risk | TSS200  |
| cg24738909 | <i>ASXL2</i>    | chr2  | 0.019442033 | - T2D risk | TSS200  |
| cg11218092 | <i>LMCD1</i>    | chr3  | 0.019442033 | - T2D risk | TSS200  |
| cg22385817 | <i>CNTROB</i>   | chr17 | 0.019442033 | - T2D risk | TSS1500 |
| cg13802269 | <i>USP53</i>    | chr4  | 0.019442033 | - T2D risk | TSS200  |
| cg08532152 | <i>CTR9</i>     | chr11 | 0.019442033 | - T2D risk | TSS200  |
| cg20064047 | <i>ASH1L</i>    | chr1  | 0.019442033 | - T2D risk | TSS1500 |
| cg14621522 | <i>PDE8A</i>    | chr15 | 0.019442033 | - T2D risk | TSS200  |
| cg14621522 | <i>PDE8A</i>    | chr15 | 0.019442033 | - T2D risk | 5'UTR   |
| cg02920502 | <i>PICALM</i>   | chr11 | 0.019442033 | - T2D risk | 1stExon |
| cg02920502 | <i>PICALM</i>   | chr11 | 0.019442033 | - T2D risk | 5'UTR   |
| cg03974985 | <i>TMEM131</i>  | chr2  | 0.019442033 | - T2D risk | TSS200  |
| cg00550558 | <i>ATP6V1H</i>  | chr8  | 0.019442033 | - T2D risk | 5'UTR   |
| cg00550558 | <i>ATP6V1H</i>  | chr8  | 0.019442033 | - T2D risk | TSS200  |
| cg08033122 | <i>CLOCK</i>    | chr4  | 0.019442033 | - T2D risk | TSS200  |
| cg08033122 | <i>CLOCK</i>    | chr4  | 0.019442033 | - T2D risk | TSS1500 |



|            |          |       |             |            |         |
|------------|----------|-------|-------------|------------|---------|
| cg08175981 | PACS2    | chr14 | 0.019442033 | - T2D risk | TSS200  |
| cg25590798 | GALK2    | chr15 | 0.019442033 | - T2D risk | 5'UTR   |
| cg25590798 | GALK2    | chr15 | 0.019442033 | - T2D risk | 1stExon |
| cg25590798 | GALK2    | chr15 | 0.019442033 | - T2D risk | Body    |
| cg08704681 | KIAA1217 | chr10 | 0.019442033 | - T2D risk | TSS200  |
| cg02170751 | TMEM219  | chr16 | 0.019442033 | - T2D risk | TSS200  |
| cg03945322 | ARIH1    | chr15 | 0.019442033 | - T2D risk | TSS200  |
| cg00803088 | RET      | chr10 | 0.019442033 | - T2D risk | Body    |
| cg26187048 | PDE5A    | chr4  | 0.019442033 | - T2D risk | 5'UTR   |
| cg26187048 | PDE5A    | chr4  | 0.019442033 | - T2D risk | TSS200  |
| cg26187048 | PDE5A    | chr4  | 0.019442033 | - T2D risk | Body    |
| cg21273856 | NCOA7    | chr6  | 0.019442033 | - T2D risk | 5'UTR   |
| cg21273856 | NCOA7    | chr6  | 0.019442033 | - T2D risk | 1stExon |
| cg06517759 | SUB1     | chr5  | 0.019442033 | - T2D risk | 5'UTR   |
| cg12454419 | SCARB2   | chr4  | 0.019442033 | - T2D risk | TSS200  |
| cg00463356 | PACS2    | chr14 | 0.019442033 | - T2D risk | 5'UTR   |
| cg00463356 | PACS2    | chr14 | 0.019442033 | - T2D risk | TSS200  |
| cg10764405 | CHKA     | chr11 | 0.019442033 | - T2D risk | Body    |
| cg15969216 | TSC22D1  | chr13 | 0.019442033 | - T2D risk | 1stExon |
| cg15969216 | TSC22D1  | chr13 | 0.019442033 | - T2D risk | 5'UTR   |
| cg27645750 | ITGB1    | chr10 | 0.019442033 | - T2D risk | TSS200  |
| cg27645750 | ITGB1    | chr10 | 0.019442033 | - T2D risk | TSS1500 |
| cg18986332 | CLASP2   | chr3  | 0.019442033 | - T2D risk | 5'UTR   |
| cg18986332 | CLASP2   | chr3  | 0.019442033 | - T2D risk | 1stExon |
| cg09983462 | SEZ6L    | chr22 | 0.019442033 | - T2D risk | TSS200  |
| cg18831827 | PDLIM5   | chr4  | 0.019442033 | - T2D risk | 5'UTR   |
| cg18831827 | PDLIM5   | chr4  | 0.019442033 | - T2D risk | Body    |
| cg12619398 | DDHD2    | chr8  | 0.019442033 | - T2D risk | 5'UTR   |
| cg12619398 | DDHD2    | chr8  | 0.019442033 | - T2D risk | TSS200  |
| cg23708044 | AGPAT3   | chr21 | 0.019442033 | - T2D risk | TSS1500 |
| cg20276511 | WIZ      | chr19 | 0.019442033 | - T2D risk | Body    |
| cg17055145 | MYO6     | chr6  | 0.019442033 | - T2D risk | 1stExon |
| cg17055145 | MYO6     | chr6  | 0.019442033 | - T2D risk | 5'UTR   |
| cg14744768 | MET      | chr7  | 0.019442033 | - T2D risk | TSS200  |
| cg12297652 | SCAF8    | chr6  | 0.019442033 | - T2D risk | 1stExon |
| cg12297652 | SCAF8    | chr6  | 0.019442033 | - T2D risk | Body    |
| cg12297652 | SCAF8    | chr6  | 0.019442033 | - T2D risk | 5'UTR   |
| cg11948421 | ATRN     | chr20 | 0.019442033 | - T2D risk | TSS200  |
| cg20401102 | PDLIM5   | chr4  | 0.019442033 | - T2D risk | TSS200  |
| cg10918452 | AMD1     | chr6  | 0.019442033 | - T2D risk | TSS200  |
| cg06240275 | SGSM2    | chr17 | 0.019442033 | - T2D risk | TSS1500 |
| cg12774325 | IFT74    | chr9  | 0.019442033 | - T2D risk | TSS1500 |
| cg12774325 | IFT74    | chr9  | 0.019442033 | - T2D risk | 5'UTR   |
| cg12774325 | IFT74    | chr9  | 0.019442033 | - T2D risk | 1stExon |
| cg00470794 | CHFR     | chr12 | 0.019442033 | - T2D risk | TSS1500 |
| cg18313583 | GGPS1    | chr1  | 0.019442033 | - T2D risk | TSS1500 |
| cg23071995 | PRMT3    | chr11 | 0.019442033 | - T2D risk | 5'UTR   |
| cg23071995 | PRMT3    | chr11 | 0.019442033 | - T2D risk | 1stExon |
| cg01373721 | TIMM23   | chr10 | 0.019442033 | - T2D risk | TSS1500 |
| cg11697812 | UBE2K    | chr4  | 0.019442033 | - T2D risk | TSS1500 |
| cg20634234 | FARSB    | chr2  | 0.019442033 | - T2D risk | TSS200  |
| cg05707170 | PPP1R12A | chr12 | 0.019442033 | - T2D risk | Body    |
| cg05707170 | PPP1R12A | chr12 | 0.019442033 | - T2D risk | 1stExon |
| cg14650005 | AMD1     | chr6  | 0.019442033 | - T2D risk | TSS200  |
| cg12449162 | CLIC5    | chr6  | 0.019442033 | - T2D risk | 5'UTR   |
| cg12449162 | CLIC5    | chr6  | 0.019442033 | - T2D risk | 1stExon |
| cg12449162 | CLIC5    | chr6  | 0.019442033 | - T2D risk | Body    |
| cg16303686 | DNAJC13  | chr3  | 0.019442033 | - T2D risk | TSS1500 |
| cg13717023 | ARL15    | chr5  | 0.019442033 | - T2D risk | TSS1500 |
| cg23698058 | PRKACB   | chr1  | 0.019442033 | - T2D risk | Body    |
| cg22477592 | NPAT     | chr11 | 0.019442033 | - T2D risk | TSS1500 |
| cg03796881 | ZHX2     | chr8  | 0.019442033 | - T2D risk | 1stExon |
| cg03796881 | ZHX2     | chr8  | 0.019442033 | - T2D risk | 5'UTR   |
| cg02596175 | PRKAG2   | chr7  | 0.019442033 | - T2D risk | TSS1500 |
| cg10886005 | TMEM131  | chr2  | 0.019442033 | - T2D risk | 5'UTR   |
| cg10886005 | TMEM131  | chr2  | 0.019442033 | - T2D risk | 1stExon |
| cg23539966 | RTN4     | chr2  | 0.019442033 | - T2D risk | TSS1500 |
| cg23539966 | RTN4     | chr2  | 0.019442033 | - T2D risk | 1stExon |
| cg23539966 | RTN4     | chr2  | 0.019442033 | - T2D risk | 5'UTR   |
| cg24224907 | ACTN4    | chr19 | 0.019442033 | - T2D risk | TSS200  |



|            |           |       |             |            |         |
|------------|-----------|-------|-------------|------------|---------|
| cg24632656 | IFT74     | chr9  | 0.019442033 | - T2D risk | TSS1500 |
| cg24632656 | IFT74     | chr9  | 0.019442033 | - T2D risk | TSS200  |
| cg09483807 | ATP6V1H   | chr8  | 0.019442033 | - T2D risk | TSS200  |
| cg09483807 | ATP6V1H   | chr8  | 0.019442033 | - T2D risk | 5'UTR   |
| cg09483807 | ATP6V1H   | chr8  | 0.019442033 | - T2D risk | 1stExon |
| cg02528979 | SEC31A    | chr4  | 0.019442033 | - T2D risk | TSS1500 |
| cg17510133 | NUCB2     | chr11 | 0.019442033 | - T2D risk | TSS200  |
| cg01357613 | ZHX2      | chr8  | 0.019442033 | - T2D risk | 5'UTR   |
| cg27298069 | CLOCK     | chr4  | 0.019442033 | - T2D risk | TSS200  |
| cg27298069 | CLOCK     | chr4  | 0.019442033 | - T2D risk | 5'UTR   |
| cg02570004 | FBXO11    | chr2  | 0.019442033 | - T2D risk | TSS1500 |
| cg25901444 | SLC29A4   | chr7  | 0.019442033 | - T2D risk | Body    |
| cg25655574 | IFT74     | chr9  | 0.019442033 | - T2D risk | TSS1500 |
| cg25655574 | IFT74     | chr9  | 0.019442033 | - T2D risk | TSS200  |
| cg17245548 | TSGA10    | chr2  | 0.019442033 | - T2D risk | 5'UTR   |
| cg17245548 | TSGA10    | chr2  | 0.019442033 | - T2D risk | TSS200  |
| cg05920643 | RBBP6     | chr16 | 0.019442033 | - T2D risk | 1stExon |
| cg02165443 | PDE7A     | chr8  | 0.019442033 | - T2D risk | TSS1500 |
| cg26127449 | BIRC5     | chr17 | 0.019442033 | - T2D risk | TSS200  |
| cg16204216 | NUP98     | chr11 | 0.019442033 | - T2D risk | TSS200  |
| cg02742186 | CRYL1     | chr13 | 0.019442033 | - T2D risk | TSS200  |
| cg14853706 | AMD1      | chr6  | 0.019442033 | - T2D risk | 5'UTR   |
| cg14853706 | AMD1      | chr6  | 0.019442033 | - T2D risk | Body    |
| cg05051199 | PCYT1A    | chr3  | 0.019442033 | - T2D risk | TSS1500 |
| cg22418394 | PACRG     | chr6  | 0.019442033 | - T2D risk | TSS200  |
| cg22418394 | PACRG     | chr6  | 0.019442033 | - T2D risk | 5'UTR   |
| cg17135680 | UXS1      | chr2  | 0.019442033 | - T2D risk | TSS1500 |
| cg03235761 | CLEC16A   | chr16 | 0.019442033 | - T2D risk | TSS200  |
| cg21907663 | EVI5      | chr1  | 0.019442033 | - T2D risk | Body    |
| cg05059031 | INPP4A    | chr2  | 0.019442033 | - T2D risk | TSS200  |
| cg16643813 | USP53     | chr4  | 0.019442033 | - T2D risk | TSS1500 |
| cg21161649 | AGPAT3    | chr21 | 0.019442033 | - T2D risk | TSS1500 |
| cg14989602 | ZDHHC2    | chr8  | 0.019442033 | - T2D risk | TSS1500 |
| cg10501090 | ATRNL     | chr20 | 0.019442033 | - T2D risk | Body    |
| cg10501090 | ATRNL     | chr20 | 0.019442033 | - T2D risk | 1stExon |
| cg09543727 | PDE5A     | chr4  | 0.019442033 | - T2D risk | TSS1500 |
| cg23690033 | MEIS2     | chr15 | 0.019442033 | - T2D risk | TSS200  |
| cg23690033 | MEIS2     | chr15 | 0.019442033 | - T2D risk | TSS1500 |
| cg00256785 | CHFR      | chr12 | 0.019442033 | - T2D risk | TSS200  |
| cg09194362 | POC1B     | chr12 | 0.019442033 | - T2D risk | TSS200  |
| cg09194362 | POC1B     | chr12 | 0.019442033 | - T2D risk | Body    |
| cg01383668 | ARPP19    | chr15 | 0.019442033 | - T2D risk | Body    |
| cg05787193 | PRKACB    | chr1  | 0.019442033 | - T2D risk | TSS1500 |
| cg19658926 | HNRNPA2B1 | chr7  | 0.019442033 | - T2D risk | TSS200  |
| cg00563793 | PACS1     | chr11 | 0.019442033 | - T2D risk | TSS1500 |
| cg06580782 | WDR48     | chr3  | 0.019442033 | - T2D risk | TSS200  |
| cg22944368 | PFKFB2    | chr1  | 0.019442033 | - T2D risk | TSS200  |
| cg25581784 | TOP2A     | chr17 | 0.019442033 | - T2D risk | Body    |
| cg02500844 | CNTROB    | chr17 | 0.019442033 | - T2D risk | TSS1500 |
| cg19042513 | NUF2      | chr1  | 0.019442033 | - T2D risk | TSS200  |
| cg16781439 | KREMEN1   | chr22 | 0.019442033 | - T2D risk | TSS200  |
| cg00551736 | PRKAG2    | chr7  | 0.019442033 | - T2D risk | 1stExon |
| cg12551582 | CHFR      | chr12 | 0.019442033 | - T2D risk | TSS1500 |
| cg21717959 | PACRG     | chr6  | 0.019442033 | - T2D risk | TSS1500 |
| cg21717959 | PACRG     | chr6  | 0.019442033 | - T2D risk | 5'UTR   |
| cg24050613 | ST6GAL1   | chr3  | 0.019442033 | - T2D risk | TSS1500 |
| cg18334211 | PRKAG2    | chr7  | 0.019442033 | - T2D risk | Body    |
| cg03461725 | PDE8A     | chr15 | 0.019442033 | - T2D risk | TSS200  |
| cg17152658 | EFR3A     | chr8  | 0.019442033 | - T2D risk | 1stExon |
| cg17152658 | EFR3A     | chr8  | 0.019442033 | - T2D risk | 5'UTR   |
| cg15161218 | AMD1      | chr6  | 0.019442033 | - T2D risk | TSS200  |
| cg04907505 | RAP1B     | chr12 | 0.019442033 | - T2D risk | TSS1500 |
| cg08902293 | HNRNPA2B1 | chr7  | 0.019442033 | - T2D risk | TSS1500 |
| cg21378393 | SGSM2     | chr17 | 0.019442033 | - T2D risk | TSS1500 |
| cg11328420 | RHBDD1    | chr2  | 0.019442033 | - T2D risk | TSS200  |
| cg25204988 | NF1       | chr17 | 0.019442033 | - T2D risk | TSS200  |
| cg04380635 | SEC31A    | chr4  | 0.019442033 | - T2D risk | TSS200  |
| cg15445111 | SPPL2A    | chr15 | 0.019442033 | - T2D risk | 1stExon |
| cg15445111 | SPPL2A    | chr15 | 0.019442033 | - T2D risk | 5'UTR   |
| cg06452669 | CCNB1     | chr5  | 0.019442033 | - T2D risk | Body    |



|            |                  |       |             |            |         |
|------------|------------------|-------|-------------|------------|---------|
| cg13738611 | <i>RAP1B</i>     | chr12 | 0.019442033 | - T2D risk | TSS200  |
| cg17311778 | <i>RBBP6</i>     | chr16 | 0.019442033 | - T2D risk | TSS200  |
| cg08699355 | <i>PPP1R12A</i>  | chr12 | 0.019442033 | - T2D risk | TSS200  |
| cg08699355 | <i>PPP1R12A</i>  | chr12 | 0.019442033 | - T2D risk | 5'UTR   |
| cg18829183 | <i>ARID2</i>     | chr12 | 0.019442033 | - T2D risk | Body    |
| cg22827060 | <i>UBL3</i>      | chr13 | 0.019442033 | - T2D risk | 1stExon |
| cg22827060 | <i>UBL3</i>      | chr13 | 0.019442033 | - T2D risk | 5'UTR   |
| cg07236904 | <i>CLOCK</i>     | chr4  | 0.019442033 | - T2D risk | TSS1500 |
| cg04933208 | <i>PTPRU</i>     | chr1  | 0.019458157 | - T2D risk | Body    |
| cg16130454 | <i>NUP98</i>     | chr11 | 0.019460563 | - T2D risk | 5'UTR   |
| cg16130454 | <i>NUP98</i>     | chr11 | 0.019460563 | - T2D risk | 1stExon |
| cg01491794 | <i>YWHAQ</i>     | chr2  | 0.019471534 | - T2D risk | TSS200  |
| cg15657206 | <i>CTR9</i>      | chr11 | 0.019514762 | - T2D risk | TSS200  |
| cg23545671 | <i>TSC22D1</i>   | chr13 | 0.019566852 | - T2D risk | Body    |
| cg23545671 | <i>TSC22D1</i>   | chr13 | 0.019566852 | - T2D risk | TSS200  |
| cg11965312 | <i>CADM1</i>     | chr11 | 0.019590326 | - T2D risk | Body    |
| cg11843606 | <i>RHBDD1</i>    | chr2  | 0.019625316 | - T2D risk | 5'UTR   |
| cg01402631 | <i>SPOCK1</i>    | chr5  | 0.019703919 | - T2D risk | Body    |
| cg04446677 | <i>TAB2</i>      | chr6  | 0.019715255 | + T2D risk | Body    |
| cg14793086 | <i>LCA5</i>      | chr6  | 0.019718289 | - T2D risk | 1stExon |
| cg14793086 | <i>LCA5</i>      | chr6  | 0.019718289 | - T2D risk | 5'UTR   |
| cg03570279 | <i>RSF1</i>      | chr11 | 0.019736528 | + T2D risk | Body    |
| cg21490755 | <i>PDE7A</i>     | chr8  | 0.019739303 | - T2D risk | TSS1500 |
| cg02454372 | <i>DYNC111</i>   | chr7  | 0.019758195 | + T2D risk | Body    |
| cg17671846 | <i>AGPAT3</i>    | chr21 | 0.019759588 | + T2D risk | 5'UTR   |
| cg00506738 | <i>PRMT3</i>     | chr11 | 0.019798507 | - T2D risk | 5'UTR   |
| cg00506738 | <i>PRMT3</i>     | chr11 | 0.019798507 | - T2D risk | 1stExon |
| cg13176143 | <i>SSB</i>       | chr2  | 0.019806017 | - T2D risk | 1stExon |
| cg13176143 | <i>SSB</i>       | chr2  | 0.019806017 | - T2D risk | 5'UTR   |
| cg14975318 | <i>NUCB2</i>     | chr11 | 0.019817963 | - T2D risk | 5'UTR   |
| cg04121115 | <i>TMEM59</i>    | chr1  | 0.019824856 | - T2D risk | TSS200  |
| cg04941409 | <i>MYO6</i>      | chr6  | 0.019842467 | - T2D risk | Body    |
| cg23938220 | <i>APC</i>       | chr5  | 0.019882079 | - T2D risk | 5'UTR   |
| cg23938220 | <i>APC</i>       | chr5  | 0.019882079 | - T2D risk | TSS200  |
| cg20351189 | <i>SEZ6L</i>     | chr22 | 0.019909262 | - T2D risk | Body    |
| cg24023097 | <i>FAM160A1</i>  | chr4  | 0.019925983 | - T2D risk | TSS200  |
| cg23924526 | <i>PRKCE</i>     | chr2  | 0.019935616 | + T2D risk | Body    |
| cg15582684 | <i>CHID1</i>     | chr11 | 0.020003244 | - T2D risk | 5'UTR   |
| cg15582684 | <i>CHID1</i>     | chr11 | 0.020003244 | - T2D risk | TSS200  |
| cg26163463 | <i>EIF4EBP3</i>  | chr5  | 0.020037123 | + T2D risk | TSS1500 |
| cg24713673 | <i>ASH1L</i>     | chr1  | 0.020050712 | - T2D risk | Body    |
| cg25283175 | <i>BIRC5</i>     | chr17 | 0.020064432 | - T2D risk | 3'UTR   |
| cg07196207 | <i>SEC31A</i>    | chr4  | 0.020096901 | - T2D risk | 1stExon |
| cg07196207 | <i>SEC31A</i>    | chr4  | 0.020096901 | - T2D risk | 5'UTR   |
| cg21160551 | <i>ZHX2</i>      | chr8  | 0.020134092 | - T2D risk | Body    |
| cg18324467 | <i>RNF157</i>    | chr17 | 0.02017273  | - T2D risk | TSS1500 |
| cg00590260 | <i>DIP2C</i>     | chr10 | 0.020233117 | - T2D risk | Body    |
| cg05418333 | <i>CUX1</i>      | chr7  | 0.020254517 | + T2D risk | Body    |
| cg01058983 | <i>TBC1D5</i>    | chr3  | 0.020257499 | - T2D risk | TSS1500 |
| cg04069454 | <i>ATP8A2</i>    | chr13 | 0.020265262 | + T2D risk | Body    |
| cg07479864 | <i>ARIH1</i>     | chr15 | 0.020276184 | - T2D risk | TSS200  |
| cg00464814 | <i>ATXN1</i>     | chr6  | 0.020283114 | + T2D risk | 5'UTR   |
| cg11010242 | <i>HNRNPA2B1</i> | chr7  | 0.020289521 | - T2D risk | TSS200  |
| cg00491154 | <i>GLG1</i>      | chr16 | 0.020290439 | + T2D risk | Body    |
| cg00595231 | <i>TMEM131</i>   | chr2  | 0.020306379 | + T2D risk | Body    |
| cg09744584 | <i>CLOCK</i>     | chr4  | 0.02031211  | - T2D risk | 5'UTR   |
| cg09744584 | <i>CLOCK</i>     | chr4  | 0.02031211  | - T2D risk | TSS1500 |
| cg17978764 | <i>CLIC5</i>     | chr6  | 0.0203515   | - T2D risk | Body    |
| cg09144707 | <i>GAD1</i>      | chr2  | 0.020396822 | + T2D risk | Body    |
| cg20013571 | <i>KIAA0355</i>  | chr19 | 0.020407319 | + T2D risk | Body    |
| cg25727952 | <i>CRYL1</i>     | chr13 | 0.020409102 | - T2D risk | Body    |
| cg26230138 | <i>TMEM131</i>   | chr2  | 0.020426892 | + T2D risk | Body    |
| cg10937807 | <i>DIP2C</i>     | chr10 | 0.020464145 | + T2D risk | Body    |
| cg13982511 | <i>PRMT3</i>     | chr11 | 0.020476082 | - T2D risk | 5'UTR   |
| cg13982511 | <i>PRMT3</i>     | chr11 | 0.020476082 | - T2D risk | 1stExon |
| cg19153494 | <i>LMX1B</i>     | chr9  | 0.020503638 | - T2D risk | TSS200  |
| cg16856264 | <i>NF1</i>       | chr17 | 0.020530999 | - T2D risk | Body    |
| cg16589614 | <i>AGPAT3</i>    | chr21 | 0.020539932 | + T2D risk | Body    |
| cg06306684 | <i>CHID1</i>     | chr11 | 0.020608183 | - T2D risk | TSS1500 |
| cg06306684 | <i>CHID1</i>     | chr11 | 0.020608183 | - T2D risk | 5'UTR   |



|            |          |       |             |            |         |
|------------|----------|-------|-------------|------------|---------|
| cg00145849 | UBE2K    | chr4  | 0.020611589 | - T2D risk | TSS200  |
| cg17139035 | DDHD2    | chr8  | 0.020611731 | - T2D risk | TSS1500 |
| cg15980305 | FBXO11   | chr2  | 0.020690062 | - T2D risk | 1stExon |
| cg21346528 | HMBXO1   | chr8  | 0.020717775 | + T2D risk | Body    |
| cg22888007 | FNIP2    | chr4  | 0.020759077 | - T2D risk | Body    |
| cg09955645 | DIP2C    | chr10 | 0.02077217  | - T2D risk | Body    |
| cg07986519 | PPFIBP1  | chr12 | 0.020779882 | + T2D risk | TSS1500 |
| cg17317180 | NUCB2    | chr11 | 0.02078079  | - T2D risk | TSS1500 |
| cg05890550 | RAP1GAP2 | chr17 | 0.020888506 | - T2D risk | TSS200  |
| cg09306188 | MGRN1    | chr16 | 0.020928695 | + T2D risk | Body    |
| cg05148930 | UXS1     | chr2  | 0.020950274 | + T2D risk | Body    |
| cg11413800 | MAST1    | chr19 | 0.021087732 | + T2D risk | 5'UTR   |
| cg11413800 | MAST1    | chr19 | 0.021087732 | + T2D risk | 1stExon |
| cg02512074 | TMEM131  | chr2  | 0.021092417 | + T2D risk | Body    |
| cg04230700 | COL4A1   | chr13 | 0.021108986 | - T2D risk | Body    |
| cg02171500 | CHKA     | chr11 | 0.021113731 | - T2D risk | Body    |
| cg05928023 | ATRNL    | chr20 | 0.021172121 | - T2D risk | TSS200  |
| cg16308229 | PTP4A2   | chr1  | 0.021228951 | + T2D risk | Body    |
| cg27227281 | SRPK2    | chr7  | 0.021273138 | + T2D risk | Body    |
| cg06913008 | POC1B    | chr12 | 0.021277858 | - T2D risk | TSS200  |
| cg06913008 | POC1B    | chr12 | 0.021277858 | - T2D risk | Body    |
| cg25421615 | SVIP     | chr11 | 0.021320188 | - T2D risk | TSS200  |
| cg15258722 | COL4A1   | chr13 | 0.021367616 | + T2D risk | 3'UTR   |
| cg13721302 | SRPK2    | chr7  | 0.02137882  | - T2D risk | Body    |
| cg24462974 | PCYT1A   | chr3  | 0.021393155 | + T2D risk | 1stExon |
| cg24462974 | PCYT1A   | chr3  | 0.021393155 | + T2D risk | 5'UTR   |
| cg19548539 | CHID1    | chr11 | 0.021429532 | + T2D risk | 5'UTR   |
| cg19548539 | CHID1    | chr11 | 0.021429532 | + T2D risk | TSS200  |
| cg02523617 | UBE2K    | chr4  | 0.021506157 | - T2D risk | TSS1500 |
| cg17933386 | SSBP2    | chr5  | 0.02153772  | - T2D risk | TSS200  |
| cg18143675 | CUX1     | chr7  | 0.021585951 | - T2D risk | Body    |
| cg24180839 | ARL15    | chr5  | 0.021610187 | - T2D risk | Body    |
| cg08305551 | MAST1    | chr19 | 0.021639569 | + T2D risk | Body    |
| cg09822191 | PPFIBP1  | chr12 | 0.021646798 | - T2D risk | 5'UTR   |
| cg09040184 | PDE7A    | chr8  | 0.021684243 | - T2D risk | TSS200  |
| cg00393957 | ATXN1    | chr6  | 0.021753228 | - T2D risk | 5'UTR   |
| cg00777989 | GALK2    | chr15 | 0.021775481 | - T2D risk | Body    |
| cg25936980 | ARIH1    | chr15 | 0.02177761  | - T2D risk | Body    |
| cg18520125 | FLT1     | chr13 | 0.021795102 | + T2D risk | Body    |
| cg11388000 | CEP126   | chr11 | 0.021821991 | + T2D risk | Body    |
| cg08432204 | NCOA7    | chr6  | 0.021829597 | - T2D risk | Body    |
| cg07238439 | TPCN1    | chr12 | 0.021844734 | + T2D risk | Body    |
| cg24749470 | CADM1    | chr11 | 0.021935428 | + T2D risk | Body    |
| cg07097949 | UBL3     | chr13 | 0.021942354 | + T2D risk | Body    |
| cg20073681 | MGRN1    | chr16 | 0.021954467 | + T2D risk | TSS1500 |
| cg03960871 | ST20     | chr15 | 0.021969442 | - T2D risk | 1stExon |
| cg03960871 | ST20     | chr15 | 0.021969442 | - T2D risk | 5'UTR   |
| cg03960871 | ST20     | chr15 | 0.021969442 | - T2D risk | Body    |
| cg14429526 | DIP2C    | chr10 | 0.021983397 | - T2D risk | Body    |
| cg08806444 | ARL8B    | chr3  | 0.021993759 | - T2D risk | 5'UTR   |
| cg08806444 | ARL8B    | chr3  | 0.021993759 | - T2D risk | 1stExon |
| cg13477178 | DIP2C    | chr10 | 0.022003914 | - T2D risk | Body    |
| cg17758563 | ATXN1    | chr6  | 0.02207735  | + T2D risk | Body    |
| cg24713789 | AGPAT3   | chr21 | 0.02209715  | - T2D risk | 5'UTR   |
| cg26831416 | ACTN4    | chr19 | 0.022144892 | - T2D risk | Body    |
| cg15547001 | CADM1    | chr11 | 0.022217589 | + T2D risk | Body    |
| cg11392877 | PDE8A    | chr15 | 0.022222015 | - T2D risk | TSS1500 |
| cg02967392 | PACS2    | chr14 | 0.022222525 | - T2D risk | 5'UTR   |
| cg11561371 | PHF21A   | chr11 | 0.022230431 | - T2D risk | TSS1500 |
| cg06973293 | SCARB2   | chr4  | 0.022235489 | - T2D risk | 5'UTR   |
| cg06973293 | SCARB2   | chr4  | 0.022235489 | - T2D risk | 1stExon |
| cg17989243 | RSF1     | chr11 | 0.02223613  | + T2D risk | Body    |
| cg14233507 | SKAP1    | chr17 | 0.022313637 | - T2D risk | TSS200  |
| cg11783515 | KIAA0355 | chr19 | 0.022354302 | - T2D risk | Body    |
| cg03076324 | DNAJC1   | chr10 | 0.022365812 | - T2D risk | 5'UTR   |
| cg03076324 | DNAJC1   | chr10 | 0.022365812 | - T2D risk | 1stExon |
| cg13432682 | ITPKB    | chr1  | 0.022368851 | + T2D risk | Body    |
| cg19392911 | ST20     | chr15 | 0.022395239 | - T2D risk | TSS200  |
| cg19392911 | ST20     | chr15 | 0.022395239 | - T2D risk | Body    |
| cg20848842 | TANC2    | chr17 | 0.022434524 | - T2D risk | Body    |



|            |           |       |             |            |         |
|------------|-----------|-------|-------------|------------|---------|
| cg08317883 | CUX2      | chr12 | 0.022471153 | + T2D risk | Body    |
| cg14228269 | KCNJ12    | chr17 | 0.022510101 | + T2D risk | 5'UTR   |
| cg13094511 | INPP4A    | chr2  | 0.022523716 | - T2D risk | TSS200  |
| cg14720477 | TENM2     | chr5  | 0.022524858 | - T2D risk | Body    |
| cg10324413 | ARIH1     | chr15 | 0.02253398  | - T2D risk | ExonBnd |
| cg10324413 | ARIH1     | chr15 | 0.02253398  | - T2D risk | Body    |
| cg19207033 | PDE7A     | chr8  | 0.022569261 | - T2D risk | TSS200  |
| cg26572392 | KIAA1217  | chr10 | 0.022594487 | + T2D risk | TSS1500 |
| cg26572392 | KIAA1217  | chr10 | 0.022594487 | + T2D risk | 5'UTR   |
| cg10370262 | PRKAG2    | chr7  | 0.022605278 | + T2D risk | Body    |
| cg02941444 | ADCY5     | chr3  | 0.022643022 | - T2D risk | Body    |
| cg02941444 | ADCY5     | chr3  | 0.022643022 | - T2D risk | TSS1500 |
| cg10102384 | PACRG     | chr6  | 0.022782658 | - T2D risk | TSS200  |
| cg10102384 | PACRG     | chr6  | 0.022782658 | - T2D risk | TSS1500 |
| cg18345406 | FAM160A1  | chr4  | 0.022844415 | - T2D risk | 5'UTR   |
| cg06023506 | PRKCE     | chr2  | 0.022868171 | + T2D risk | Body    |
| cg23506964 | CLOCK     | chr4  | 0.022879407 | - T2D risk | TSS1500 |
| cg14323109 | KDR       | chr4  | 0.022904526 | - T2D risk | TSS200  |
| cg23723775 | NUP98     | chr11 | 0.022917757 | + T2D risk | Body    |
| cg00577935 | APC       | chr5  | 0.022964932 | - T2D risk | TSS1500 |
| cg00577935 | APC       | chr5  | 0.022964932 | - T2D risk | 5'UTR   |
| cg18281160 | CADM1     | chr11 | 0.023025933 | - T2D risk | TSS200  |
| cg05496738 | ASXL2     | chr2  | 0.023053243 | - T2D risk | TSS1500 |
| cg10505257 | MGRN1     | chr16 | 0.023073177 | + T2D risk | Body    |
| cg01061590 | PPFIBP1   | chr12 | 0.02313812  | - T2D risk | 5'UTR   |
| cg01061590 | PPFIBP1   | chr12 | 0.02313812  | - T2D risk | 1stExon |
| cg00995902 | ERC2      | chr3  | 0.023142164 | + T2D risk | Body    |
| cg14892570 | WIZ       | chr19 | 0.023174274 | + T2D risk | 5'UTR   |
| cg15286601 | SRPK2     | chr7  | 0.023284802 | + T2D risk | Body    |
| cg11774909 | KIAA1217  | chr10 | 0.023290958 | - T2D risk | Body    |
| cg24130534 | NUF2      | chr1  | 0.023316562 | - T2D risk | TSS200  |
| cg17652206 | USP53     | chr4  | 0.02334831  | - T2D risk | TSS200  |
| cg21796999 | SGSM2     | chr17 | 0.023413823 | + T2D risk | 3'UTR   |
| cg09306986 | CREBBP    | chr16 | 0.023424221 | + T2D risk | Body    |
| cg08060515 | GALK2     | chr15 | 0.023440839 | - T2D risk | 5'UTR   |
| cg08060515 | GALK2     | chr15 | 0.023440839 | - T2D risk | 1stExon |
| cg00164350 | ACTN4     | chr19 | 0.023456695 | + T2D risk | Body    |
| cg18892778 | PRKAG2    | chr7  | 0.023491763 | - T2D risk | 5'UTR   |
| cg18892778 | PRKAG2    | chr7  | 0.023491763 | - T2D risk | Body    |
| cg15615045 | CLEC16A   | chr16 | 0.023640267 | - T2D risk | Body    |
| cg10282410 | CALD1     | chr7  | 0.023693716 | - T2D risk | Body    |
| cg02198771 | BCAT1     | chr12 | 0.023696023 | + T2D risk | Body    |
| cg00934564 | TTC28     | chr22 | 0.023767739 | + T2D risk | Body    |
| cg03961189 | CTR9      | chr11 | 0.023772398 | - T2D risk | TSS200  |
| cg13393195 | TPCN1     | chr12 | 0.023876737 | + T2D risk | TSS200  |
| cg24167027 | KCNJ12    | chr17 | 0.023911462 | + T2D risk | TSS1500 |
| cg04996852 | CREBBP    | chr16 | 0.023916841 | - T2D risk | 1stExon |
| cg04996852 | CREBBP    | chr16 | 0.023916841 | - T2D risk | 5'UTR   |
| cg23888154 | ATP8A1    | chr4  | 0.023943715 | - T2D risk | TSS200  |
| cg02847074 | CUX2      | chr12 | 0.023959896 | - T2D risk | Body    |
| cg07123198 | HNRNPA2B1 | chr7  | 0.024051372 | + T2D risk | Body    |
| cg10809719 | DIP2C     | chr10 | 0.024052813 | - T2D risk | Body    |
| cg06993329 | CHID1     | chr11 | 0.024092576 | + T2D risk | Body    |
| cg27067133 | RET       | chr10 | 0.02413563  | + T2D risk | Body    |
| cg06648971 | SNX4      | chr3  | 0.024178584 | - T2D risk | 5'UTR   |
| cg06648971 | SNX4      | chr3  | 0.024178584 | - T2D risk | 1stExon |
| cg08306029 | DIP2C     | chr10 | 0.02429273  | - T2D risk | Body    |
| cg27097962 | PACS2     | chr14 | 0.024303171 | - T2D risk | TSS1500 |
| cg06578097 | PRMT3     | chr11 | 0.02432605  | - T2D risk | TSS1500 |
| cg04263685 | ATP6V1H   | chr8  | 0.024331422 | - T2D risk | TSS200  |
| cg04263685 | ATP6V1H   | chr8  | 0.024331422 | - T2D risk | TSS1500 |
| cg11848677 | POLA1     | chrX  | 0.024367256 | - T2D risk | Body    |
| cg17339505 | RET       | chr10 | 0.024374926 | - T2D risk | 1stExon |
| cg17339505 | RET       | chr10 | 0.024374926 | - T2D risk | 5'UTR   |
| cg19681027 | CHKA      | chr11 | 0.024405248 | - T2D risk | 1stExon |
| cg09359751 | TMEM131   | chr2  | 0.024412259 | + T2D risk | Body    |
| cg15419330 | TENM2     | chr5  | 0.024454077 | - T2D risk | Body    |
| cg00436183 | ATXN1     | chr6  | 0.024454443 | + T2D risk | Body    |
| cg17844160 | ARL15     | chr5  | 0.024476039 | + T2D risk | TSS200  |
| cg06644086 | EFR3A     | chr8  | 0.02449602  | - T2D risk | ExonBnd |



|            |                  |       |             |            |         |
|------------|------------------|-------|-------------|------------|---------|
| cg06644086 | <i>EFR3A</i>     | chr8  | 0.02449602  | - T2D risk | Body    |
| cg13965276 | <i>RBM4</i>      | chr11 | 0.024516377 | - T2D risk | TSS1500 |
| cg16386051 | <i>ATP8A1</i>    | chr4  | 0.024587117 | + T2D risk | Body    |
| cg20702204 | <i>CHFR</i>      | chr12 | 0.02466733  | + T2D risk | Body    |
| cg18267330 | <i>INPP4A</i>    | chr2  | 0.024670746 | - T2D risk | 5'UTR   |
| cg01994290 | <i>PLEKHG3</i>   | chr14 | 0.024672275 | - T2D risk | TSS1500 |
| cg10989326 | <i>EVI5</i>      | chr1  | 0.024694484 | - T2D risk | TSS1500 |
| cg17521868 | <i>KIAA1217</i>  | chr10 | 0.024713455 | - T2D risk | TSS200  |
| cg17521868 | <i>KIAA1217</i>  | chr10 | 0.024713455 | - T2D risk | 5'UTR   |
| cg17521868 | <i>KIAA1217</i>  | chr10 | 0.024713455 | - T2D risk | Body    |
| cg07626446 | <i>AMD1</i>      | chr6  | 0.024790939 | - T2D risk | 5'UTR   |
| cg04635366 | <i>PDE5A</i>     | chr4  | 0.02480554  | - T2D risk | Body    |
| cg04635366 | <i>PDE5A</i>     | chr4  | 0.02480554  | - T2D risk | TSS200  |
| cg04635366 | <i>PDE5A</i>     | chr4  | 0.02480554  | - T2D risk | 5'UTR   |
| cg19038894 | <i>WWP2</i>      | chr16 | 0.024915468 | - T2D risk | Body    |
| cg04384209 | <i>KDM4B</i>     | chr19 | 0.024939169 | + T2D risk | 5'UTR   |
| cg22780174 | <i>DIP2C</i>     | chr10 | 0.024993104 | - T2D risk | Body    |
| cg12243267 | <i>USP29</i>     | chr19 | 0.025020476 | - T2D risk | TSS1500 |
| cg04627328 | <i>PDE3A</i>     | chr12 | 0.025025903 | + T2D risk | Body    |
| cg19419598 | <i>ITGA1</i>     | chr5  | 0.025033216 | - T2D risk | TSS200  |
| cg21620743 | <i>GLG1</i>      | chr16 | 0.025058495 | - T2D risk | Body    |
| cg13870451 | <i>SLIT3</i>     | chr5  | 0.025148972 | + T2D risk | Body    |
| cg01056637 | <i>ATP8A2</i>    | chr13 | 0.025445006 | - T2D risk | Body    |
| cg12523815 | <i>PHF21A</i>    | chr11 | 0.025469717 | - T2D risk | 5'UTR   |
| cg18242990 | <i>GNA12</i>     | chr7  | 0.025475485 | - T2D risk | TSS200  |
| cg00607264 | <i>DNAJC1</i>    | chr10 | 0.025513177 | - T2D risk | 5'UTR   |
| cg00607264 | <i>DNAJC1</i>    | chr10 | 0.025513177 | - T2D risk | 1stExon |
| cg07764140 | <i>DENND4C</i>   | chr9  | 0.025564473 | + T2D risk | Body    |
| cg02811712 | <i>ARPP19</i>    | chr15 | 0.025578459 | - T2D risk | TSS1500 |
| cg13586204 | <i>TSGA10</i>    | chr2  | 0.025754783 | - T2D risk | Body    |
| cg00422519 | <i>APBA1</i>     | chr9  | 0.025814893 | - T2D risk | Body    |
| cg22734228 | <i>CUX1</i>      | chr7  | 0.025819    | + T2D risk | Body    |
| cg07566917 | <i>DIP2C</i>     | chr10 | 0.025836505 | + T2D risk | Body    |
| cg12430467 | <i>TJP1</i>      | chr15 | 0.02586164  | + T2D risk | TSS1500 |
| cg26360121 | <i>KIAA0355</i>  | chr19 | 0.025864072 | - T2D risk | 5'UTR   |
| cg26360121 | <i>KIAA0355</i>  | chr19 | 0.025864072 | - T2D risk | 1stExon |
| cg18189314 | <i>RGS7</i>      | chr1  | 0.025897574 | - T2D risk | Body    |
| cg10692693 | <i>CUX1</i>      | chr7  | 0.025924483 | - T2D risk | Body    |
| cg11844827 | <i>HNRNPA2B1</i> | chr7  | 0.025960315 | - T2D risk | 5'UTR   |
| cg11844827 | <i>HNRNPA2B1</i> | chr7  | 0.025960315 | - T2D risk | 1stExon |
| cg20140940 | <i>RGS7</i>      | chr1  | 0.026005194 | - T2D risk | Body    |
| cg11115622 | <i>PLEKHG3</i>   | chr14 | 0.026006498 | - T2D risk | TSS1500 |
| cg01676918 | <i>EFR3A</i>     | chr8  | 0.026013137 | + T2D risk | Body    |
| cg03253073 | <i>PRKAG2</i>    | chr7  | 0.026104627 | + T2D risk | Body    |
| cg12316290 | <i>UBL3</i>      | chr13 | 0.026128525 | - T2D risk | TSS1500 |
| cg25642172 | <i>ARPP19</i>    | chr15 | 0.026129365 | + T2D risk | TSS1500 |
| cg18763911 | <i>WIZ</i>       | chr19 | 0.026228307 | - T2D risk | TSS1500 |
| cg04397316 | <i>TAB2</i>      | chr6  | 0.026236281 | - T2D risk | 5'UTR   |
| cg04397316 | <i>TAB2</i>      | chr6  | 0.026236281 | - T2D risk | Body    |
| cg22912359 | <i>TOP2A</i>     | chr17 | 0.02625151  | - T2D risk | TSS200  |
| cg26926919 | <i>ERC2</i>      | chr3  | 0.026278916 | - T2D risk | 3'UTR   |
| cg15929700 | <i>INPP4A</i>    | chr2  | 0.026504195 | - T2D risk | Body    |
| cg25429446 | <i>ANK2</i>      | chr4  | 0.026520162 | - T2D risk | Body    |
| cg11283604 | <i>PRKAG2</i>    | chr7  | 0.026525806 | + T2D risk | Body    |
| cg24120297 | <i>DACH1</i>     | chr13 | 0.026529218 | - T2D risk | Body    |
| cg23838943 | <i>KDM4B</i>     | chr19 | 0.026593793 | + T2D risk | Body    |
| cg16403964 | <i>TMEM131</i>   | chr2  | 0.026619016 | - T2D risk | Body    |
| cg10010183 | <i>PTPRU</i>     | chr1  | 0.026669164 | - T2D risk | Body    |
| cg09664975 | <i>PRKACB</i>    | chr1  | 0.026734571 | + T2D risk | TSS200  |
| cg00868206 | <i>TAB2</i>      | chr6  | 0.02677362  | - T2D risk | 5'UTR   |
| cg00868206 | <i>TAB2</i>      | chr6  | 0.02677362  | - T2D risk | Body    |
| cg03738400 | <i>PDE8A</i>     | chr15 | 0.026793935 | - T2D risk | 5'UTR   |
| cg03738400 | <i>PDE8A</i>     | chr15 | 0.026793935 | - T2D risk | Body    |
| cg00494000 | <i>GRK5</i>      | chr10 | 0.0267951   | - T2D risk | Body    |
| cg05476493 | <i>LAMA4</i>     | chr6  | 0.026796573 | + T2D risk | Body    |
| cg21018689 | <i>PRKAG2</i>    | chr7  | 0.026798587 | - T2D risk | TSS200  |
| cg17472610 | <i>CUX1</i>      | chr7  | 0.026867614 | + T2D risk | Body    |
| cg22124678 | <i>ZHX2</i>      | chr8  | 0.026896419 | - T2D risk | TSS200  |
| cg20931305 | <i>ATXN1</i>     | chr6  | 0.026902277 | - T2D risk | 5'UTR   |
| cg07208650 | <i>NCOA2</i>     | chr8  | 0.026921706 | + T2D risk | Body    |



|            |          |       |             |            |         |
|------------|----------|-------|-------------|------------|---------|
| cg16072823 | DIP2C    | chr10 | 0.026939761 | + T2D risk | Body    |
| cg02698770 | CLEC16A  | chr16 | 0.026961419 | + T2D risk | Body    |
| cg23736485 | WIZ      | chr19 | 0.026964283 | - T2D risk | TSS1500 |
| cg07676002 | CDH22    | chr20 | 0.027061854 | - T2D risk | 1stExon |
| cg07676002 | CDH22    | chr20 | 0.027061854 | - T2D risk | 5'UTR   |
| cg19770550 | MMS19    | chr10 | 0.027067838 | - T2D risk | 1stExon |
| cg19770550 | MMS19    | chr10 | 0.027067838 | - T2D risk | 5'UTR   |
| cg09805925 | DIP2C    | chr10 | 0.027138255 | + T2D risk | Body    |
| cg10254692 | PLAGL1   | chr6  | 0.027178629 | - T2D risk | TSS1500 |
| cg24368124 | PACS1    | chr11 | 0.027206513 | - T2D risk | Body    |
| cg06212607 | GGPS1    | chr1  | 0.027273147 | - T2D risk | TSS200  |
| cg14933266 | NF1      | chr17 | 0.027302576 | - T2D risk | 1stExon |
| cg14933266 | NF1      | chr17 | 0.027302576 | - T2D risk | 5'UTR   |
| cg01216424 | DDC      | chr7  | 0.027319531 | - T2D risk | Body    |
| cg13945567 | FAM160A1 | chr4  | 0.027333049 | - T2D risk | 5'UTR   |
| cg13945567 | FAM160A1 | chr4  | 0.027333049 | - T2D risk | 1stExon |
| cg20311501 | APC      | chr5  | 0.027348636 | - T2D risk | 5'UTR   |
| cg20311501 | APC      | chr5  | 0.027348636 | - T2D risk | TSS200  |
| cg04631584 | PHACTR1  | chr6  | 0.027348734 | - T2D risk | Body    |
| cg27585914 | CALD1    | chr7  | 0.027392472 | - T2D risk | 5'UTR   |
| cg05148789 | PRMT3    | chr11 | 0.027402351 | - T2D risk | Body    |
| cg00722097 | AMD1     | chr6  | 0.027405342 | - T2D risk | TSS200  |
| cg01352634 | FBXO11   | chr2  | 0.027407413 | - T2D risk | TSS1500 |
| cg02601626 | CHID1    | chr11 | 0.027519183 | + T2D risk | Body    |
| cg13029606 | ARHGEF9  | chrX  | 0.027538324 | - T2D risk | Body    |
| cg03552472 | TIMM23   | chr10 | 0.02764772  | - T2D risk | TSS1500 |
| cg03879109 | CREBBP   | chr16 | 0.027764475 | - T2D risk | 3'UTR   |
| cg08804258 | LMCD1    | chr3  | 0.02777256  | - T2D risk | TSS200  |
| cg16559695 | PACS2    | chr14 | 0.027826679 | - T2D risk | 3'UTR   |
| cg05526886 | RHBDD1   | chr2  | 0.027842609 | - T2D risk | 5'UTR   |
| cg05439814 | RBBP6    | chr16 | 0.027855516 | - T2D risk | TSS200  |
| cg26875355 | TOP2A    | chr17 | 0.027864381 | + T2D risk | Body    |
| cg26875355 | TOP2A    | chr17 | 0.027864381 | + T2D risk | ExonBnd |
| cg09516362 | NQO1     | chr16 | 0.027877827 | - T2D risk | 5'UTR   |
| cg09516362 | NQO1     | chr16 | 0.027877827 | - T2D risk | 1stExon |
| cg06030477 | KIAA1217 | chr10 | 0.027895742 | - T2D risk | Body    |
| cg04816971 | USP53    | chr4  | 0.027926672 | + T2D risk | 5'UTR   |
| cg04816971 | USP53    | chr4  | 0.027926672 | + T2D risk | 1stExon |
| cg26791649 | RAP2A    | chr13 | 0.027933999 | + T2D risk | 3'UTR   |
| cg00688802 | RHBDD1   | chr2  | 0.027984573 | - T2D risk | 3'UTR   |
| cg25042258 | CUL1     | chr7  | 0.028021988 | + T2D risk | Body    |
| cg13404079 | PLEKHG3  | chr14 | 0.028037202 | - T2D risk | TSS200  |
| cg07831198 | ACTN4    | chr19 | 0.028226892 | + T2D risk | Body    |
| cg24318365 | DIP2C    | chr10 | 0.028407675 | + T2D risk | Body    |
| cg03217795 | PRKCB    | chr16 | 0.028469014 | - T2D risk | 1stExon |
| cg06934615 | SMG7     | chr1  | 0.028490823 | - T2D risk | 1stExon |
| cg06934615 | SMG7     | chr1  | 0.028490823 | - T2D risk | 5'UTR   |
| cg10124355 | KDM4B    | chr19 | 0.028512825 | + T2D risk | Body    |
| cg07638884 | ROBO2    | chr3  | 0.028536259 | - T2D risk | TSS1500 |
| cg09806900 | CUL1     | chr7  | 0.02864076  | + T2D risk | Body    |
| cg26889586 | RCAN2    | chr6  | 0.028648496 | - T2D risk | Body    |
| cg16136926 | CLASP2   | chr3  | 0.028718514 | - T2D risk | Body    |
| cg16136926 | CLASP2   | chr3  | 0.028718514 | - T2D risk | TSS1500 |
| cg08466495 | ATXN1    | chr6  | 0.028723622 | - T2D risk | 5'UTR   |
| cg09018718 | ATXN1    | chr6  | 0.028763593 | + T2D risk | 5'UTR   |
| cg17864737 | TANC2    | chr17 | 0.028774117 | + T2D risk | Body    |
| cg06337717 | CRYL1    | chr13 | 0.02878514  | - T2D risk | Body    |
| cg06569421 | CUX1     | chr7  | 0.028785915 | + T2D risk | Body    |
| cg16519495 | ENAH     | chr1  | 0.028889338 | + T2D risk | Body    |
| cg07507918 | PLAGL1   | chr6  | 0.028892491 | - T2D risk | TSS200  |
| cg03778388 | PPP1R12A | chr12 | 0.028929064 | - T2D risk | Body    |
| cg03778388 | PPP1R12A | chr12 | 0.028929064 | - T2D risk | 1stExon |
| cg21311644 | UXS1     | chr2  | 0.028966925 | + T2D risk | TSS1500 |
| cg01291392 | SGSM2    | chr17 | 0.029011274 | + T2D risk | Body    |
| cg10390979 | CLEC16A  | chr16 | 0.02901973  | - T2D risk | Body    |
| cg22703532 | GRK5     | chr10 | 0.029062318 | + T2D risk | Body    |
| cg13072810 | ANK2     | chr4  | 0.029114527 | - T2D risk | Body    |
| cg02060584 | ANK2     | chr4  | 0.029163183 | - T2D risk | TSS200  |
| cg02060584 | ANK2     | chr4  | 0.029163183 | - T2D risk | Body    |
| cg15094819 | DNAH9    | chr17 | 0.029194917 | - T2D risk | 1stExon |



|            |                 |       |             |            |         |
|------------|-----------------|-------|-------------|------------|---------|
| cg22206842 | <i>SPOCK1</i>   | chr5  | 0.029248502 | + T2D risk | Body    |
| cg18721155 | <i>DIP2C</i>    | chr10 | 0.029254111 | - T2D risk | Body    |
| cg15716812 | <i>APBA1</i>    | chr9  | 0.029330959 | + T2D risk | 1stExon |
| cg15716812 | <i>APBA1</i>    | chr9  | 0.029330959 | + T2D risk | 5'UTR   |
| cg22814146 | <i>BCAT1</i>    | chr12 | 0.029359968 | + T2D risk | Body    |
| cg01211769 | <i>SKAP1</i>    | chr17 | 0.029406955 | - T2D risk | Body    |
| cg03565923 | <i>SPOCK1</i>   | chr5  | 0.029476385 | - T2D risk | Body    |
| cg00982952 | <i>GLG1</i>     | chr16 | 0.029507594 | - T2D risk | Body    |
| cg25977384 | <i>CLEC16A</i>  | chr16 | 0.029567047 | - T2D risk | Body    |
| cg25642020 | <i>KDM4B</i>    | chr19 | 0.029600462 | + T2D risk | 5'UTR   |
| cg24835999 | <i>DDC</i>      | chr7  | 0.0296077   | - T2D risk | Body    |
| cg10306584 | <i>TTC28</i>    | chr22 | 0.029652959 | - T2D risk | Body    |
| cg05697637 | <i>ATP8A1</i>   | chr4  | 0.029654541 | - T2D risk | TSS1500 |
| cg09547578 | <i>PPFIBP1</i>  | chr12 | 0.029763415 | + T2D risk | Body    |
| cg00173911 | <i>ATXN1</i>    | chr6  | 0.029790549 | + T2D risk | 5'UTR   |
| cg06682763 | <i>RSF1</i>     | chr11 | 0.029868683 | - T2D risk | Body    |
| cg07280272 | <i>DLL4</i>     | chr15 | 0.029892234 | + T2D risk | 3'UTR   |
| cg08799032 | <i>PRKCE</i>    | chr2  | 0.029932153 | + T2D risk | Body    |
| cg12850545 | <i>NCOA7</i>    | chr6  | 0.029933761 | - T2D risk | 5'UTR   |
| cg11180303 | <i>HMBBOX1</i>  | chr8  | 0.029959338 | - T2D risk | TSS1500 |
| cg25986496 | <i>BIRC5</i>    | chr17 | 0.030031781 | + T2D risk | TSS1500 |
| cg07398555 | <i>TANC2</i>    | chr17 | 0.030072518 | + T2D risk | Body    |
| cg04656576 | <i>TENM2</i>    | chr5  | 0.030073563 | - T2D risk | Body    |
| cg11703569 | <i>PKD1</i>     | chr2  | 0.030107253 | - T2D risk | Body    |
| cg27010421 | <i>DYNC111</i>  | chr7  | 0.030111788 | - T2D risk | Body    |
| cg01690625 | <i>CLEC16A</i>  | chr16 | 0.030118864 | + T2D risk | Body    |
| cg21647361 | <i>CUX1</i>     | chr7  | 0.03023356  | - T2D risk | Body    |
| cg18682873 | <i>RHOQ</i>     | chr2  | 0.030305673 | - T2D risk | TSS200  |
| cg21232943 | <i>ACSS2</i>    | chr20 | 0.03030678  | - T2D risk | Body    |
| cg21232943 | <i>ACSS2</i>    | chr20 | 0.03030678  | - T2D risk | ExonBnd |
| cg11382054 | <i>PPFIBP1</i>  | chr12 | 0.030358462 | - T2D risk | 5'UTR   |
| cg06193766 | <i>DIP2C</i>    | chr10 | 0.030390368 | - T2D risk | Body    |
| cg05755092 | <i>NUP98</i>    | chr11 | 0.030390562 | - T2D risk | 5'UTR   |
| cg05755092 | <i>NUP98</i>    | chr11 | 0.030390562 | - T2D risk | 1stExon |
| cg08545398 | <i>TMEM59</i>   | chr1  | 0.03043891  | - T2D risk | TSS200  |
| cg04254159 | <i>PDE7A</i>    | chr8  | 0.030463294 | + T2D risk | TSS200  |
| cg04254159 | <i>PDE7A</i>    | chr8  | 0.030463294 | + T2D risk | Body    |
| cg26314512 | <i>DIP2C</i>    | chr10 | 0.030465885 | - T2D risk | Body    |
| cg09830206 | <i>PACS1</i>    | chr11 | 0.030467739 | + T2D risk | Body    |
| cg25648198 | <i>ANK3</i>     | chr10 | 0.030474284 | - T2D risk | Body    |
| cg25612405 | <i>CREBBP</i>   | chr16 | 0.030478547 | + T2D risk | Body    |
| cg23128634 | <i>RANBP17</i>  | chr5  | 0.030489026 | - T2D risk | TSS200  |
| cg17077815 | <i>TMEM131</i>  | chr2  | 0.030490469 | + T2D risk | Body    |
| cg25043477 | <i>RSF1</i>     | chr11 | 0.030514837 | - T2D risk | 1stExon |
| cg25043477 | <i>RSF1</i>     | chr11 | 0.030514837 | - T2D risk | 5'UTR   |
| cg15291615 | <i>CLEC16A</i>  | chr16 | 0.030573126 | + T2D risk | Body    |
| cg19928336 | <i>SRPK2</i>    | chr7  | 0.030578612 | - T2D risk | TSS200  |
| cg21332508 | <i>RAP1GAP2</i> | chr17 | 0.030653865 | - T2D risk | Body    |
| cg25173240 | <i>UBE2K</i>    | chr4  | 0.030659816 | - T2D risk | Body    |
| cg23758158 | <i>RET</i>      | chr10 | 0.030690457 | + T2D risk | Body    |
| cg22565961 | <i>SSBP2</i>    | chr5  | 0.030692343 | + T2D risk | Body    |
| cg20333536 | <i>ARHGAP32</i> | chr11 | 0.030763198 | - T2D risk | Body    |
| cg13931914 | <i>TPCN1</i>    | chr12 | 0.030775848 | - T2D risk | TSS1500 |
| cg13600448 | <i>CLEC16A</i>  | chr16 | 0.030784856 | - T2D risk | Body    |
| cg16333971 | <i>UBL3</i>     | chr13 | 0.030830346 | + T2D risk | TSS200  |
| cg25712088 | <i>DIP2C</i>    | chr10 | 0.030910925 | - T2D risk | Body    |
| cg13366219 | <i>RNF157</i>   | chr17 | 0.030917438 | - T2D risk | 1stExon |
| cg00033551 | <i>MGRN1</i>    | chr16 | 0.030945957 | + T2D risk | Body    |
| cg00033551 | <i>MGRN1</i>    | chr16 | 0.030945957 | + T2D risk | 3'UTR   |
| cg13837816 | <i>TAB2</i>     | chr6  | 0.030988623 | + T2D risk | TSS1500 |
| cg15128842 | <i>CALD1</i>    | chr7  | 0.031046976 | + T2D risk | Body    |
| cg17852997 | <i>CRYL1</i>    | chr13 | 0.031051835 | + T2D risk | TSS1500 |
| cg09292525 | <i>KIAA0232</i> | chr4  | 0.03107503  | - T2D risk | Body    |
| cg25400013 | <i>NPAT</i>     | chr11 | 0.031220031 | - T2D risk | TSS200  |
| cg23245009 | <i>DIP2C</i>    | chr10 | 0.031380313 | - T2D risk | Body    |
| cg04287966 | <i>ATP8A2</i>   | chr13 | 0.031533802 | - T2D risk | Body    |
| cg02350295 | <i>CREBBP</i>   | chr16 | 0.031577889 | + T2D risk | Body    |
| cg15562220 | <i>SCGN</i>     | chr6  | 0.03158852  | - T2D risk | TSS200  |
| cg11527220 | <i>SPAG9</i>    | chr17 | 0.031625765 | - T2D risk | 3'UTR   |
| cg03914662 | <i>PACS1</i>    | chr11 | 0.031626636 | - T2D risk | Body    |



|            |           |       |             |            |         |
|------------|-----------|-------|-------------|------------|---------|
| cg08323023 | TAB2      | chr6  | 0.031653583 | + T2D risk | Body    |
| cg07782585 | RET       | chr10 | 0.031672887 | + T2D risk | Body    |
| cg04988768 | COL4A1    | chr13 | 0.031681588 | - T2D risk | Body    |
| cg13319197 | PHF21A    | chr11 | 0.031768425 | - T2D risk | 5'UTR   |
| cg18216587 | CNTNAP2   | chr7  | 0.031790718 | - T2D risk | Body    |
| cg16261875 | CLIC5     | chr6  | 0.031823769 | + T2D risk | TSS1500 |
| cg16261875 | CLIC5     | chr6  | 0.031823769 | + T2D risk | Body    |
| cg27039612 | TOP2A     | chr17 | 0.031843363 | + T2D risk | TSS1500 |
| cg08013355 | TENM2     | chr5  | 0.03186499  | - T2D risk | Body    |
| cg22434185 | ST20      | chr15 | 0.031932467 | - T2D risk | TSS200  |
| cg22434185 | ST20      | chr15 | 0.031932467 | - T2D risk | Body    |
| cg17054841 | SLC29A4   | chr7  | 0.031944644 | + T2D risk | Body    |
| cg21373996 | DIP2C     | chr10 | 0.031979835 | + T2D risk | Body    |
| cg01444209 | RGS7      | chr1  | 0.032095664 | + T2D risk | Body    |
| cg04996334 | LMX1B     | chr9  | 0.032181236 | - T2D risk | Body    |
| cg03111576 | CLEC16A   | chr16 | 0.03219285  | + T2D risk | Body    |
| cg24417971 | CUX1      | chr7  | 0.032234548 | - T2D risk | Body    |
| cg27016993 | PLAGL1    | chr6  | 0.032256622 | + T2D risk | 5'UTR   |
| cg11385204 | DIP2C     | chr10 | 0.032286472 | + T2D risk | Body    |
| cg23454289 | CUX1      | chr7  | 0.032331206 | + T2D risk | Body    |
| cg18204079 | PRKCE     | chr2  | 0.03235377  | + T2D risk | 1stExon |
| cg18204079 | PRKCE     | chr2  | 0.03235377  | + T2D risk | 5'UTR   |
| cg25618486 | TPCN1     | chr12 | 0.032360788 | + T2D risk | Body    |
| cg27307154 | CDK8      | chr13 | 0.032368715 | - T2D risk | Body    |
| cg23805664 | UNC80     | chr2  | 0.032380585 | + T2D risk | Body    |
| cg10810761 | IFT74     | chr9  | 0.032397748 | - T2D risk | 5'UTR   |
| cg10810761 | IFT74     | chr9  | 0.032397748 | - T2D risk | 1stExon |
| cg17953636 | SVIP      | chr11 | 0.032409595 | + T2D risk | 1stExon |
| cg17953636 | SVIP      | chr11 | 0.032409595 | + T2D risk | 5'UTR   |
| cg15735507 | CLEC16A   | chr16 | 0.032412765 | + T2D risk | Body    |
| cg18225582 | PLEKHG3   | chr14 | 0.03245934  | - T2D risk | 1stExon |
| cg18225582 | PLEKHG3   | chr14 | 0.03245934  | - T2D risk | 5'UTR   |
| cg03746851 | KCNJ12    | chr17 | 0.032481307 | + T2D risk | 5'UTR   |
| cg03991849 | PACS2     | chr14 | 0.032657167 | - T2D risk | TSS1500 |
| cg02730492 | COL4A1    | chr13 | 0.032706939 | + T2D risk | Body    |
| cg15305836 | PRKAG2    | chr7  | 0.032824918 | - T2D risk | Body    |
| cg26225767 | CUX2      | chr12 | 0.032846872 | + T2D risk | Body    |
| cg05589743 | ULK4      | chr3  | 0.032882243 | + T2D risk | 5'UTR   |
| cg17870270 | LCA5      | chr6  | 0.032938828 | - T2D risk | TSS200  |
| cg22230648 | TOX3      | chr16 | 0.032942203 | - T2D risk | Body    |
| cg00491607 | POC1B     | chr12 | 0.032942256 | - T2D risk | 5'UTR   |
| cg00491607 | POC1B     | chr12 | 0.032942256 | - T2D risk | Body    |
| cg24119463 | CLEC16A   | chr16 | 0.032969755 | + T2D risk | TSS1500 |
| cg14407304 | MGRN1     | chr16 | 0.033175817 | - T2D risk | Body    |
| cg13796605 | TSC22D1   | chr13 | 0.03319851  | - T2D risk | Body    |
| cg13796605 | TSC22D1   | chr13 | 0.03319851  | - T2D risk | 5'UTR   |
| cg15650664 | MET       | chr7  | 0.033256907 | + T2D risk | Body    |
| cg25283471 | PRMT3     | chr11 | 0.033296032 | - T2D risk | 5'UTR   |
| cg25283471 | PRMT3     | chr11 | 0.033296032 | - T2D risk | 1stExon |
| cg11723361 | ANKHD1    | chr5  | 0.033368189 | + T2D risk | TSS1500 |
| cg13471712 | PHF21A    | chr11 | 0.033482695 | + T2D risk | 3'UTR   |
| cg02976843 | RAP1GAP2  | chr17 | 0.033510246 | + T2D risk | Body    |
| cg21030867 | ULK4      | chr3  | 0.033543432 | - T2D risk | Body    |
| cg18793367 | CUX1      | chr7  | 0.033563466 | - T2D risk | Body    |
| cg03216410 | KDM4B     | chr19 | 0.033635874 | - T2D risk | 5'UTR   |
| cg07873251 | DLL4      | chr15 | 0.033636393 | + T2D risk | TSS1500 |
| cg09992406 | DIP2C     | chr10 | 0.033661526 | + T2D risk | Body    |
| cg10128878 | PACS1     | chr11 | 0.033691787 | - T2D risk | Body    |
| cg17918227 | CADM1     | chr11 | 0.033764939 | - T2D risk | Body    |
| cg05867001 | PACS2     | chr14 | 0.033777233 | - T2D risk | Body    |
| cg05867001 | PACS2     | chr14 | 0.033777233 | - T2D risk | 5'UTR   |
| cg19815354 | RSF1      | chr11 | 0.033788805 | - T2D risk | Body    |
| cg11201273 | DDHD2     | chr8  | 0.033933739 | - T2D risk | TSS1500 |
| cg11201273 | DDHD2     | chr8  | 0.033933739 | - T2D risk | TSS200  |
| cg22216302 | ACSS2     | chr20 | 0.033935668 | - T2D risk | Body    |
| cg26691415 | KIAA1217  | chr10 | 0.033971837 | - T2D risk | Body    |
| cg12651632 | TANC2     | chr17 | 0.034057873 | + T2D risk | 3'UTR   |
| cg17545334 | HNRNPA2B1 | chr7  | 0.034116825 | + T2D risk | TSS1500 |
| cg04571417 | CLEC16A   | chr16 | 0.034234639 | + T2D risk | Body    |
| cg01640577 | SEC31A    | chr4  | 0.034266992 | - T2D risk | 1stExon |



|            |          |       |             |            |         |
|------------|----------|-------|-------------|------------|---------|
| cg01640577 | SEC31A   | chr4  | 0.034266992 | - T2D risk | TSS200  |
| cg01640577 | SEC31A   | chr4  | 0.034266992 | - T2D risk | 5'UTR   |
| cg24879426 | RHOA     | chr3  | 0.034356255 | - T2D risk | TSS1500 |
| cg09524422 | ITPKB    | chr1  | 0.034375863 | - T2D risk | Body    |
| cg10644659 | CUX1     | chr7  | 0.034434599 | - T2D risk | Body    |
| cg24317988 | ITGB1    | chr10 | 0.034440703 | - T2D risk | TSS200  |
| cg24317988 | ITGB1    | chr10 | 0.034440703 | - T2D risk | TSS1500 |
| cg08672557 | DNAJC1   | chr10 | 0.034508464 | + T2D risk | TSS200  |
| cg03555233 | ZHX2     | chr8  | 0.034531408 | - T2D risk | 5'UTR   |
| cg19684445 | NCOA7    | chr6  | 0.034545244 | - T2D risk | 5'UTR   |
| cg19684445 | NCOA7    | chr6  | 0.034545244 | - T2D risk | Body    |
| cg04127538 | KIAA1109 | chr4  | 0.034555331 | + T2D risk | Body    |
| cg24030260 | TSGA10   | chr2  | 0.034603441 | + T2D risk | 5'UTR   |
| cg07173655 | ATP8A2   | chr13 | 0.034694751 | - T2D risk | Body    |
| cg23333125 | GNA12    | chr7  | 0.03475359  | - T2D risk | Body    |
| cg23333125 | GNA12    | chr7  | 0.03475359  | - T2D risk | TSS1500 |
| cg07717559 | RAP1GAP2 | chr17 | 0.034808073 | - T2D risk | TSS1500 |
| cg01404615 | DKK2     | chr4  | 0.034941888 | + T2D risk | TSS1500 |
| cg15818800 | DNAJC1   | chr10 | 0.035026824 | - T2D risk | 5'UTR   |
| cg15818800 | DNAJC1   | chr10 | 0.035026824 | - T2D risk | 1stExon |
| cg02227323 | PACS1    | chr11 | 0.035126186 | + T2D risk | Body    |
| cg02369548 | INPP4A   | chr2  | 0.035218122 | + T2D risk | 5'UTR   |
| cg13415865 | RAP1GAP2 | chr17 | 0.035227558 | + T2D risk | Body    |
| cg01056945 | RHOQ     | chr2  | 0.035335506 | - T2D risk | TSS1500 |
| cg13732130 | PRKD1    | chr14 | 0.03539769  | + T2D risk | Body    |
| cg19351350 | SLC7A2   | chr8  | 0.035436802 | + T2D risk | 3'UTR   |
| cg05769535 | TBC1D5   | chr3  | 0.035483044 | - T2D risk | Body    |
| cg13303737 | TSGA10   | chr2  | 0.035493766 | - T2D risk | 5'UTR   |
| cg13303737 | TSGA10   | chr2  | 0.035493766 | - T2D risk | TSS200  |
| cg26814089 | ARL15    | chr5  | 0.03550658  | + T2D risk | Body    |
| cg00811729 | ARID2    | chr12 | 0.035524283 | + T2D risk | Body    |
| cg14535460 | TENM2    | chr5  | 0.035711126 | + T2D risk | Body    |
| cg15010352 | MAST1    | chr19 | 0.035790304 | - T2D risk | TSS1500 |
| cg21261709 | SRPK2    | chr7  | 0.035857013 | - T2D risk | Body    |
| cg20472384 | DIP2C    | chr10 | 0.035910911 | - T2D risk | Body    |
| cg25030932 | CHID1    | chr11 | 0.036023304 | + T2D risk | Body    |
| cg07223180 | CRYL1    | chr13 | 0.03636115  | + T2D risk | Body    |
| cg20096382 | CUX2     | chr12 | 0.036376172 | + T2D risk | Body    |
| cg05780074 | SEC31A   | chr4  | 0.036469927 | - T2D risk | 1stExon |
| cg05780074 | SEC31A   | chr4  | 0.036469927 | - T2D risk | 5'UTR   |
| cg05656497 | COL4A1   | chr13 | 0.036495385 | - T2D risk | Body    |
| cg16766259 | SRPK2    | chr7  | 0.036509898 | - T2D risk | Body    |
| cg17287921 | PRKCE    | chr2  | 0.036515603 | - T2D risk | Body    |
| cg02590295 | PDE7A    | chr8  | 0.036526401 | - T2D risk | TSS1500 |
| cg25022682 | SEZ6L    | chr22 | 0.0365392   | + T2D risk | TSS1500 |
| cg16842483 | DNAJC13  | chr3  | 0.036618801 | + T2D risk | Body    |
| cg08517826 | CLASP2   | chr3  | 0.036644864 | - T2D risk | TSS200  |
| cg00166213 | ARL15    | chr5  | 0.036682182 | - T2D risk | TSS200  |
| cg00022633 | CDK8     | chr13 | 0.03670937  | + T2D risk | TSS1500 |
| cg09754479 | NPAT     | chr11 | 0.036783883 | - T2D risk | Body    |
| cg19963795 | DIP2C    | chr10 | 0.036827749 | + T2D risk | Body    |
| cg18604876 | ARL8B    | chr3  | 0.036948335 | + T2D risk | 1stExon |
| cg16185493 | ATRN     | chr20 | 0.036953988 | - T2D risk | TSS200  |
| cg14540221 | PRKAG2   | chr7  | 0.037058756 | - T2D risk | Body    |
| cg17865602 | PLAGL1   | chr6  | 0.037065244 | - T2D risk | 5'UTR   |
| cg21187117 | SSB      | chr2  | 0.03716886  | - T2D risk | Body    |
| cg05326539 | PRKAG2   | chr7  | 0.037209311 | - T2D risk | Body    |
| cg06643120 | CDH22    | chr20 | 0.037217499 | - T2D risk | 5'UTR   |
| cg21638053 | ITGA1    | chr5  | 0.037298671 | - T2D risk | Body    |
| cg15507730 | MEIS2    | chr15 | 0.037347366 | - T2D risk | 5'UTR   |
| cg15507730 | MEIS2    | chr15 | 0.037347366 | - T2D risk | TSS1500 |
| cg21408822 | ZRANB1   | chr10 | 0.037376898 | - T2D risk | 3'UTR   |
| cg00040007 | DLL4     | chr15 | 0.037393797 | - T2D risk | Body    |
| cg01762919 | PRKCE    | chr2  | 0.037445616 | - T2D risk | Body    |
| cg18297057 | DIP2C    | chr10 | 0.037602355 | + T2D risk | Body    |
| cg07922290 | CLEC16A  | chr16 | 0.037649592 | - T2D risk | Body    |
| cg26116937 | DIP2C    | chr10 | 0.037668754 | - T2D risk | Body    |
| cg16434502 | TANC2    | chr17 | 0.037757788 | - T2D risk | Body    |
| cg05063232 | FAM160A1 | chr4  | 0.037780446 | - T2D risk | Body    |
| cg02773832 | TPCN1    | chr12 | 0.03781149  | + T2D risk | 5'UTR   |



|                |          |       |             |            |         |
|----------------|----------|-------|-------------|------------|---------|
| cg02773832     | TPCN1    | chr12 | 0.03781149  | + T2D risk | Body    |
| cg07489553     | YWHAQ    | chr2  | 0.037837141 | - T2D risk | TSS200  |
| cg00733379     | TTC28    | chr22 | 0.037857232 | + T2D risk | Body    |
| cg16684217     | PHACTR1  | chr6  | 0.037883144 | + T2D risk | Body    |
| cg15922553     | PACRG    | chr6  | 0.038073678 | + T2D risk | Body    |
| cg14450821     | SPPL2A   | chr15 | 0.038089127 | - T2D risk | TSS1500 |
| cg05837493     | NGF      | chr1  | 0.038130688 | - T2D risk | TSS200  |
| cg25265627     | PDE3A    | chr12 | 0.038183443 | - T2D risk | TSS200  |
| cg19156280     | NGLY1    | chr3  | 0.038257279 | + T2D risk | Body    |
| cg19156280     | NGLY1    | chr3  | 0.038257279 | + T2D risk | TSS200  |
| cg15721571     | ATP2B1   | chr12 | 0.038372808 | + T2D risk | Body    |
| cg24997329     | ZRANB1   | chr10 | 0.038525392 | - T2D risk | Body    |
| cg03644484     | KIAA1109 | chr4  | 0.038574845 | + T2D risk | Body    |
| cg20964024     | CUX2     | chr12 | 0.038641384 | + T2D risk | Body    |
| cg21545840     | SLIT3    | chr5  | 0.038850728 | - T2D risk | TSS1500 |
| cg15959980     | GLG1     | chr16 | 0.038909862 | + T2D risk | Body    |
| cg01510349     | KIAA1217 | chr10 | 0.038936613 | - T2D risk | Body    |
| ch.11.1834293R | PICALM   | chr11 | 0.039064592 | - T2D risk | Body    |
| cg01307861     | FLT1     | chr13 | 0.03907315  | + T2D risk | Body    |
| cg00446055     | WWP2     | chr16 | 0.039163304 | + T2D risk | Body    |
| cg25595873     | MMS19    | chr10 | 0.039189979 | - T2D risk | Body    |
| cg25576151     | ASH1L    | chr1  | 0.039222096 | + T2D risk | TSS200  |
| cg21438192     | STX6     | chr1  | 0.039256374 | - T2D risk | Body    |
| cg01445838     | PLAGL1   | chr6  | 0.039269722 | + T2D risk | 5'UTR   |
| cg07790831     | ENAH     | chr1  | 0.03936557  | + T2D risk | Body    |
| cg26143941     | POLA1    | chrX  | 0.039375552 | - T2D risk | Body    |
| cg15066676     | TSHZ1    | chr18 | 0.039391353 | - T2D risk | 5'UTR   |
| cg15066676     | TSHZ1    | chr18 | 0.039391353 | - T2D risk | Body    |
| cg04547369     | SRPK2    | chr7  | 0.039484087 | + T2D risk | Body    |
| cg12702819     | NCOA2    | chr8  | 0.039491297 | - T2D risk | Body    |
| cg13276896     | PACS2    | chr14 | 0.039491477 | + T2D risk | 1stExon |
| cg14556874     | SEZ6L    | chr22 | 0.039523517 | + T2D risk | Body    |
| cg10657965     | CUX1     | chr7  | 0.039685226 | + T2D risk | Body    |
| cg11915049     | AGPAT3   | chr21 | 0.03970077  | + T2D risk | 5'UTR   |
| cg00219169     | DIP2C    | chr10 | 0.039703649 | - T2D risk | Body    |
| cg25358033     | TPCN1    | chr12 | 0.039704796 | + T2D risk | Body    |
| cg27016906     | AMD1     | chr6  | 0.039711797 | - T2D risk | TSS200  |
| cg12260340     | TTC28    | chr22 | 0.03979997  | + T2D risk | Body    |
| cg25287071     | ITPKB    | chr1  | 0.039826726 | - T2D risk | Body    |
| cg16683383     | CHKA     | chr11 | 0.039891475 | + T2D risk | Body    |
| cg25726357     | PACRG    | chr6  | 0.039916392 | - T2D risk | TSS1500 |
| cg23713998     | PRKD1    | chr14 | 0.040025517 | - T2D risk | Body    |
| cg15411065     | NF1      | chr17 | 0.040054244 | - T2D risk | Body    |
| cg18794793     | MGRN1    | chr16 | 0.04006229  | + T2D risk | Body    |
| cg13300744     | CUX2     | chr12 | 0.040100255 | + T2D risk | Body    |
| cg11209200     | PDE7A    | chr8  | 0.040137026 | + T2D risk | 3'UTR   |
| cg11209200     | PDE7A    | chr8  | 0.040137026 | + T2D risk | Body    |
| cg06492521     | DIP2C    | chr10 | 0.040235982 | - T2D risk | Body    |
| cg05951822     | CLEC16A  | chr16 | 0.04029014  | - T2D risk | Body    |
| cg10659922     | COX6A1   | chr12 | 0.04029492  | - T2D risk | TSS200  |
| cg25240153     | PRKCB    | chr16 | 0.040309345 | + T2D risk | Body    |
| cg05711928     | DNAJC13  | chr3  | 0.040314236 | - T2D risk | TSS200  |
| cg20020409     | ERC2     | chr3  | 0.04032628  | - T2D risk | 3'UTR   |
| cg10203440     | CREBBP   | chr16 | 0.040327969 | + T2D risk | 3'UTR   |
| cg25309588     | ATP8A1   | chr4  | 0.040338897 | - T2D risk | TSS1500 |
| cg01951659     | CUX1     | chr7  | 0.040341361 | + T2D risk | Body    |
| cg13196844     | PHACTR1  | chr6  | 0.040353795 | + T2D risk | Body    |
| cg07062711     | MEIS2    | chr15 | 0.040436065 | + T2D risk | 5'UTR   |
| cg07062711     | MEIS2    | chr15 | 0.040436065 | + T2D risk | 1stExon |
| cg07062711     | MEIS2    | chr15 | 0.040436065 | + T2D risk | TSS1500 |
| cg09272951     | EIF4EBP3 | chr5  | 0.040550935 | + T2D risk | TSS1500 |
| cg24509673     | NGF      | chr1  | 0.040713392 | - T2D risk | 5'UTR   |
| cg26551894     | CALD1    | chr7  | 0.040720258 | + T2D risk | Body    |
| cg22556505     | CNTNAP2  | chr7  | 0.040722963 | - T2D risk | Body    |
| cg04135372     | INPP4A   | chr2  | 0.040735102 | - T2D risk | 1stExon |
| cg04135372     | INPP4A   | chr2  | 0.040735102 | - T2D risk | 5'UTR   |
| cg25726864     | SPPL2A   | chr15 | 0.04074291  | + T2D risk | TSS1500 |
| cg25181710     | ASXL2    | chr2  | 0.040770152 | - T2D risk | Body    |
| cg21256968     | SCARB2   | chr4  | 0.041056146 | + T2D risk | TSS1500 |
| cg17587986     | DIP2C    | chr10 | 0.04112923  | - T2D risk | Body    |



|            |          |       |             |            |         |
|------------|----------|-------|-------------|------------|---------|
| cg20212867 | ANK2     | chr4  | 0.041173413 | - T2D risk | Body    |
| cg06657455 | DIP2C    | chr10 | 0.041207984 | - T2D risk | Body    |
| cg20423765 | EFR3A    | chr8  | 0.04137214  | + T2D risk | Body    |
| cg11173615 | PHACTR1  | chr6  | 0.041403892 | - T2D risk | Body    |
| cg25374325 | FAM160A1 | chr4  | 0.041472943 | + T2D risk | 5'UTR   |
| cg16162970 | PACS2    | chr14 | 0.041482268 | - T2D risk | TSS1500 |
| cg19723459 | TPCN1    | chr12 | 0.041504995 | + T2D risk | TSS1500 |
| cg08552375 | PPFIBP1  | chr12 | 0.041545266 | + T2D risk | 5'UTR   |
| cg02516134 | CALD1    | chr7  | 0.04156196  | - T2D risk | Body    |
| cg02516134 | CALD1    | chr7  | 0.04156196  | - T2D risk | TSS1500 |
| cg08164617 | DYNC111  | chr7  | 0.041562217 | - T2D risk | 1stExon |
| cg08164617 | DYNC111  | chr7  | 0.041562217 | - T2D risk | 5'UTR   |
| cg00295485 | UXS1     | chr2  | 0.041590747 | + T2D risk | Body    |
| cg14513298 | ANK2     | chr4  | 0.041678883 | + T2D risk | Body    |
| cg23309631 | SRPK2    | chr7  | 0.041704799 | + T2D risk | Body    |
| cg18107623 | PRKAG2   | chr7  | 0.04170979  | + T2D risk | Body    |
| cg23524021 | PPFIBP1  | chr12 | 0.041727516 | + T2D risk | 5'UTR   |
| cg03670816 | ARL15    | chr5  | 0.041737471 | - T2D risk | TSS200  |
| cg09395195 | NF1      | chr17 | 0.041802689 | - T2D risk | Body    |
| cg11732619 | SLIT3    | chr5  | 0.041807909 | - T2D risk | 1stExon |
| cg11732619 | SLIT3    | chr5  | 0.041807909 | - T2D risk | 5'UTR   |
| cg00610223 | ATXN1    | chr6  | 0.041845185 | - T2D risk | 5'UTR   |
| cg23740281 | ITPKB    | chr1  | 0.041887403 | + T2D risk | Body    |
| cg06977068 | KREMEN1  | chr22 | 0.041965778 | - T2D risk | TSS200  |
| cg04031411 | CLEC16A  | chr16 | 0.042089996 | + T2D risk | Body    |
| cg24718838 | TMEM59   | chr1  | 0.042173622 | - T2D risk | TSS1500 |
| cg01471384 | DKK2     | chr4  | 0.042234048 | + T2D risk | 1stExon |
| cg01471384 | DKK2     | chr4  | 0.042234048 | + T2D risk | 5'UTR   |
| cg23318892 | PRMT3    | chr11 | 0.042283018 | + T2D risk | Body    |
| cg03668948 | SGSM2    | chr17 | 0.042317005 | - T2D risk | Body    |
| cg21240898 | MAN1A1   | chr6  | 0.042503801 | + T2D risk | Body    |
| cg09376993 | NCOA2    | chr8  | 0.04259376  | - T2D risk | 5'UTR   |
| cg00808648 | PACS2    | chr14 | 0.042658538 | - T2D risk | TSS1500 |
| cg00587523 | SKAP1    | chr17 | 0.042682141 | - T2D risk | 3'UTR   |
| cg05083115 | SEZ6L    | chr22 | 0.042839126 | + T2D risk | Body    |
| cg09120938 | CHFR     | chr12 | 0.042915208 | + T2D risk | Body    |
| cg05082153 | FNIP2    | chr4  | 0.042947447 | - T2D risk | Body    |
| cg27035480 | CREBBP   | chr16 | 0.04295531  | + T2D risk | Body    |
| cg27549075 | PTP4A2   | chr1  | 0.043022951 | + T2D risk | Body    |
| cg27549075 | PTP4A2   | chr1  | 0.043022951 | + T2D risk | 3'UTR   |
| cg23947050 | ATP8A2   | chr13 | 0.043075271 | - T2D risk | Body    |
| cg27382164 | CHFR     | chr12 | 0.043086376 | - T2D risk | TSS1500 |
| cg12445727 | SLIT3    | chr5  | 0.043091723 | - T2D risk | Body    |
| cg20311754 | COL4A1   | chr13 | 0.043105653 | + T2D risk | Body    |
| cg13757758 | RNF217   | chr6  | 0.04311169  | - T2D risk | TSS1500 |
| cg19206986 | ATP8A1   | chr4  | 0.043177055 | + T2D risk | 5'UTR   |
| cg19206986 | ATP8A1   | chr4  | 0.043177055 | + T2D risk | 1stExon |
| cg05904325 | PDLIM5   | chr4  | 0.043237228 | - T2D risk | 5'UTR   |
| cg05904325 | PDLIM5   | chr4  | 0.043237228 | - T2D risk | Body    |
| cg01804844 | TSHZ1    | chr18 | 0.043266865 | - T2D risk | 5'UTR   |
| cg13989165 | ADCY5    | chr3  | 0.043368786 | + T2D risk | Body    |
| cg24127021 | PRKAG2   | chr7  | 0.043405871 | + T2D risk | 5'UTR   |
| cg24127021 | PRKAG2   | chr7  | 0.043405871 | + T2D risk | Body    |
| cg25181749 | CDK8     | chr13 | 0.043443638 | - T2D risk | TSS1500 |
| cg25090499 | ATP8A2   | chr13 | 0.043454492 | - T2D risk | Body    |
| cg17429234 | DYNC111  | chr7  | 0.043565957 | + T2D risk | TSS1500 |
| cg01630177 | PHACTR1  | chr6  | 0.043691163 | - T2D risk | Body    |
| cg14236976 | LMX1B    | chr9  | 0.043734697 | - T2D risk | Body    |
| cg03022050 | CUX1     | chr7  | 0.043824411 | + T2D risk | Body    |
| cg24213184 | APBA1    | chr9  | 0.043869412 | - T2D risk | TSS1500 |
| cg04166393 | GNA12    | chr7  | 0.043878723 | + T2D risk | TSS1500 |
| cg15448064 | WIZ      | chr19 | 0.043899563 | - T2D risk | 5'UTR   |
| cg12603144 | TOX3     | chr16 | 0.043969073 | - T2D risk | Body    |
| cg24818905 | NF1      | chr17 | 0.043980232 | + T2D risk | Body    |
| cg23060991 | CHKA     | chr11 | 0.043995934 | + T2D risk | Body    |
| cg08448751 | SEMA3G   | chr3  | 0.044001369 | + T2D risk | TSS1500 |
| cg23302638 | BIRC5    | chr17 | 0.044001766 | + T2D risk | TSS200  |
| cg20576160 | ZDHHC2   | chr8  | 0.044017189 | + T2D risk | Body    |
| cg14310768 | FBXO11   | chr2  | 0.044024545 | - T2D risk | TSS1500 |
| cg08406370 | PRKCB    | chr16 | 0.044028995 | - T2D risk | TSS1500 |



|            |           |       |             |            |         |
|------------|-----------|-------|-------------|------------|---------|
| cg07893813 | ARPP19    | chr15 | 0.044083678 | - T2D risk | 5'UTR   |
| cg07893813 | ARPP19    | chr15 | 0.044083678 | - T2D risk | 1stExon |
| cg27487288 | TBC1D5    | chr3  | 0.044196873 | - T2D risk | 5'UTR   |
| cg01482556 | MGRN1     | chr16 | 0.044254206 | - T2D risk | TSS200  |
| cg17433934 | UXS1      | chr2  | 0.044283516 | + T2D risk | Body    |
| cg12355505 | PRKAG2    | chr7  | 0.044363171 | - T2D risk | TSS200  |
| cg04209949 | TBC1D5    | chr3  | 0.044394385 | - T2D risk | 5'UTR   |
| cg25204272 | DLL4      | chr15 | 0.044505065 | - T2D risk | 1stExon |
| cg25204272 | DLL4      | chr15 | 0.044505065 | - T2D risk | 5'UTR   |
| cg10788204 | RBM4      | chr11 | 0.044556858 | - T2D risk | 3'UTR   |
| cg04683496 | DIP2C     | chr10 | 0.044604192 | + T2D risk | Body    |
| cg02185962 | ASH1L     | chr1  | 0.044666303 | - T2D risk | TSS1500 |
| cg09292077 | ASH1L     | chr1  | 0.044691989 | + T2D risk | Body    |
| cg07962838 | PPFIBP1   | chr12 | 0.044785171 | - T2D risk | 5'UTR   |
| cg23635429 | ATRNL1    | chr10 | 0.044838151 | - T2D risk | TSS1500 |
| cg08230856 | PRKCE     | chr2  | 0.044996875 | + T2D risk | Body    |
| cg19081576 | POC1B     | chr12 | 0.045037452 | - T2D risk | Body    |
| cg19081576 | POC1B     | chr12 | 0.045037452 | - T2D risk | 5'UTR   |
| cg04130273 | RNF157    | chr17 | 0.045041143 | + T2D risk | Body    |
| cg11853350 | APBA1     | chr9  | 0.045046132 | - T2D risk | 3'UTR   |
| cg17874426 | NCOR1     | chr17 | 0.045073163 | - T2D risk | TSS1500 |
| cg08224503 | ZRANB1    | chr10 | 0.045124203 | - T2D risk | Body    |
| cg14873699 | PRKAG2    | chr7  | 0.04518995  | - T2D risk | Body    |
| cg08410533 | DIP2C     | chr10 | 0.045227292 | - T2D risk | Body    |
| cg15627145 | ANK3      | chr10 | 0.045227311 | - T2D risk | 3'UTR   |
| cg18782992 | ATP6V1H   | chr8  | 0.045234395 | + T2D risk | Body    |
| cg18782992 | ATP6V1H   | chr8  | 0.045234395 | + T2D risk | ExonBnd |
| cg09397579 | PRKAG2    | chr7  | 0.045313293 | + T2D risk | 5'UTR   |
| cg09397579 | PRKAG2    | chr7  | 0.045313293 | + T2D risk | 1stExon |
| cg09397579 | PRKAG2    | chr7  | 0.045313293 | + T2D risk | Body    |
| cg19689370 | MEIS2     | chr15 | 0.045383216 | - T2D risk | Body    |
| cg19498178 | TBC1D5    | chr3  | 0.045413313 | - T2D risk | TSS1500 |
| cg15464481 | ADCY5     | chr3  | 0.045415628 | + T2D risk | Body    |
| cg03235471 | ANK2      | chr4  | 0.045416522 | + T2D risk | Body    |
| cg00279717 | GRK5      | chr10 | 0.045468922 | - T2D risk | Body    |
| cg11645724 | KDM4B     | chr19 | 0.045536206 | + T2D risk | Body    |
| cg24000316 | CHFR      | chr12 | 0.045580599 | - T2D risk | Body    |
| cg14651327 | PRKCE     | chr2  | 0.045592224 | + T2D risk | Body    |
| cg08775511 | STX6      | chr1  | 0.045609016 | + T2D risk | Body    |
| cg01255349 | PPFIBP1   | chr12 | 0.045709779 | - T2D risk | TSS1500 |
| cg10439678 | ITGB1     | chr10 | 0.045784519 | - T2D risk | Body    |
| cg07060175 | TENM2     | chr5  | 0.045791403 | + T2D risk | Body    |
| cg01331461 | AGPAT3    | chr21 | 0.045806789 | + T2D risk | TSS200  |
| cg01331461 | AGPAT3    | chr21 | 0.045806789 | + T2D risk | 5'UTR   |
| cg13466694 | LMX1B     | chr9  | 0.046055574 | + T2D risk | Body    |
| cg16679297 | SLIT3     | chr5  | 0.046135652 | + T2D risk | Body    |
| cg10181075 | ITGB1     | chr10 | 0.046198688 | + T2D risk | Body    |
| cg05050872 | CEP126    | chr11 | 0.046201396 | - T2D risk | TSS1500 |
| cg26040729 | RSF1      | chr11 | 0.046244239 | - T2D risk | Body    |
| cg11825411 | DDC       | chr7  | 0.046261258 | + T2D risk | 5'UTR   |
| cg13152204 | PCYT1A    | chr3  | 0.046279515 | - T2D risk | 5'UTR   |
| cg22443530 | NGLY1     | chr3  | 0.046295038 | - T2D risk | Body    |
| cg11439186 | ST6GAL1   | chr3  | 0.0463196   | + T2D risk | 5'UTR   |
| cg25593340 | ST6GAL1   | chr3  | 0.046328679 | + T2D risk | 5'UTR   |
| cg26451575 | HNRNPA2B1 | chr7  | 0.046362551 | - T2D risk | TSS1500 |
| cg01486576 | SMG7      | chr1  | 0.046392467 | + T2D risk | TSS1500 |
| cg04202198 | NPAT      | chr11 | 0.046511377 | + T2D risk | Body    |
| cg05507494 | ATP6V1H   | chr8  | 0.04663842  | + T2D risk | Body    |
| cg21182176 | GGPS1     | chr1  | 0.046749358 | - T2D risk | Body    |
| cg21182176 | GGPS1     | chr1  | 0.046749358 | - T2D risk | 5'UTR   |
| cg13536079 | ZHX2      | chr8  | 0.046756064 | + T2D risk | 5'UTR   |
| cg17989826 | TOP2A     | chr17 | 0.046832224 | + T2D risk | Body    |
| cg04208175 | MGRN1     | chr16 | 0.046877716 | + T2D risk | Body    |
| cg22667208 | SH3GL2    | chr9  | 0.046889599 | - T2D risk | TSS200  |
| cg07690219 | RHOA      | chr3  | 0.046984974 | + T2D risk | TSS200  |
| cg24335280 | SGSM2     | chr17 | 0.047001255 | + T2D risk | Body    |
| cg23089673 | ARL15     | chr5  | 0.047076441 | - T2D risk | Body    |
| cg24989405 | UXS1      | chr2  | 0.047097076 | + T2D risk | Body    |
| cg26097157 | GRK5      | chr10 | 0.047103985 | + T2D risk | Body    |
| cg15444369 | ANK3      | chr10 | 0.047119434 | - T2D risk | Body    |



|            |          |       |             |            |         |
|------------|----------|-------|-------------|------------|---------|
| cg04058636 | TSHZ1    | chr18 | 0.047159475 | - T2D risk | 5'UTR   |
| cg06408211 | RAP1GAP2 | chr17 | 0.047175341 | + T2D risk | Body    |
| cg25915539 | ANK2     | chr4  | 0.047202908 | + T2D risk | Body    |
| cg17627973 | SRPK2    | chr7  | 0.047244575 | - T2D risk | Body    |
| cg25678180 | DIP2C    | chr10 | 0.047253714 | - T2D risk | Body    |
| cg07553653 | CMTR1    | chr6  | 0.047356251 | - T2D risk | Body    |
| cg26677958 | PACS2    | chr14 | 0.047405484 | + T2D risk | Body    |
| cg14556531 | MEIS2    | chr15 | 0.047445623 | + T2D risk | 5'UTR   |
| cg14556531 | MEIS2    | chr15 | 0.047445623 | + T2D risk | 1stExon |
| cg14556531 | MEIS2    | chr15 | 0.047445623 | + T2D risk | Body    |
| cg14556531 | MEIS2    | chr15 | 0.047445623 | + T2D risk | TSS1500 |
| cg23477316 | NCOA7    | chr6  | 0.04757604  | - T2D risk | 5'UTR   |
| cg23477316 | NCOA7    | chr6  | 0.04757604  | - T2D risk | Body    |
| cg12421075 | ZRANB1   | chr10 | 0.0475953   | + T2D risk | TSS200  |
| cg19057779 | AGPAT3   | chr21 | 0.04763555  | + T2D risk | Body    |
| cg24827399 | PPP1R12A | chr12 | 0.047660107 | - T2D risk | 1stExon |
| cg24827399 | PPP1R12A | chr12 | 0.047660107 | - T2D risk | 5'UTR   |
| cg12467953 | ATP4A    | chr19 | 0.047671026 | - T2D risk | Body    |
| cg24110005 | UXS1     | chr2  | 0.047671234 | - T2D risk | Body    |
| cg06493994 | SCGN     | chr6  | 0.04768397  | - T2D risk | 5'UTR   |
| cg06493994 | SCGN     | chr6  | 0.04768397  | - T2D risk | 1stExon |
| cg19086309 | CALD1    | chr7  | 0.047720166 | + T2D risk | 5'UTR   |
| cg02145728 | ANK2     | chr4  | 0.047734742 | - T2D risk | Body    |
| cg15005456 | RNF157   | chr17 | 0.047778243 | - T2D risk | Body    |
| cg16765393 | GNA12    | chr7  | 0.047869334 | - T2D risk | Body    |
| cg05085782 | UNC80    | chr2  | 0.047874769 | - T2D risk | TSS1500 |
| cg21100498 | RBBP6    | chr16 | 0.047879879 | - T2D risk | TSS200  |
| cg23931853 | PRKAG2   | chr7  | 0.04788303  | + T2D risk | Body    |
| cg16182699 | CLEC16A  | chr16 | 0.04790823  | - T2D risk | Body    |
| cg07645237 | INPP4A   | chr2  | 0.047909117 | - T2D risk | 5'UTR   |
| cg00624628 | RGS7     | chr1  | 0.047950293 | + T2D risk | Body    |
| cg13657956 | ATXN1    | chr6  | 0.047954758 | - T2D risk | 5'UTR   |
| cg02302026 | MYO6     | chr6  | 0.048046897 | + T2D risk | 5'UTR   |
| cg26875655 | CUX2     | chr12 | 0.048145921 | - T2D risk | Body    |
| cg26561082 | DIP2C    | chr10 | 0.048268817 | + T2D risk | Body    |
| cg24780234 | SPOCK1   | chr5  | 0.048300984 | - T2D risk | TSS1500 |
| cg24366564 | RAP1GAP2 | chr17 | 0.048313911 | + T2D risk | Body    |
| cg19900314 | PPFIBP1  | chr12 | 0.048395924 | + T2D risk | 5'UTR   |
| cg03613077 | RGS7     | chr1  | 0.048447837 | - T2D risk | TSS1500 |
| cg16794406 | PHF21A   | chr11 | 0.048450476 | + T2D risk | TSS200  |
| cg01566695 | DIP2C    | chr10 | 0.048517061 | - T2D risk | Body    |
| cg20570230 | TSC22D1  | chr13 | 0.048526776 | + T2D risk | Body    |
| cg14022706 | PDE5A    | chr4  | 0.048619795 | - T2D risk | TSS1500 |
| cg20116519 | GRK5     | chr10 | 0.04869067  | + T2D risk | Body    |
| cg22242408 | FBXO11   | chr2  | 0.048698002 | + T2D risk | 5'UTR   |
| cg17204289 | PRKAG2   | chr7  | 0.048802705 | + T2D risk | 5'UTR   |
| cg17204289 | PRKAG2   | chr7  | 0.048802705 | + T2D risk | 1stExon |
| cg17204289 | PRKAG2   | chr7  | 0.048802705 | + T2D risk | Body    |
| cg07096446 | FBXO11   | chr2  | 0.048815651 | + T2D risk | Body    |
| cg12762399 | PRKAG2   | chr7  | 0.048897684 | - T2D risk | Body    |
| cg14936497 | ERC2     | chr3  | 0.048901767 | + T2D risk | 3'UTR   |
| cg21891597 | EFR3A    | chr8  | 0.04891537  | + T2D risk | Body    |
| cg20198644 | PFKFB2   | chr1  | 0.048933231 | - T2D risk | Body    |
| cg02392248 | CUX1     | chr7  | 0.049000369 | - T2D risk | Body    |
| cg26585812 | PDE7A    | chr8  | 0.049120252 | + T2D risk | Body    |
| cg20130440 | PACS1    | chr11 | 0.049163713 | - T2D risk | Body    |
| cg25122934 | PPFIBP1  | chr12 | 0.049206511 | + T2D risk | 5'UTR   |
| cg08594973 | EFR3A    | chr8  | 0.049213448 | + T2D risk | Body    |
| cg16986150 | PRKAG2   | chr7  | 0.049222887 | - T2D risk | Body    |
| cg07326692 | DIP2C    | chr10 | 0.049252927 | - T2D risk | Body    |
| cg21429728 | FNIP2    | chr4  | 0.049269505 | + T2D risk | Body    |
| cg25003924 | ARPP19   | chr15 | 0.049283245 | + T2D risk | TSS1500 |
| cg13524401 | SCARB2   | chr4  | 0.049314258 | - T2D risk | Body    |
| cg06800829 | CUX1     | chr7  | 0.049315462 | + T2D risk | Body    |
| cg06948106 | SPOCK1   | chr5  | 0.049397629 | - T2D risk | Body    |
| cg21712619 | DIP2C    | chr10 | 0.049409127 | + T2D risk | Body    |
| cg26121591 | CPLX2    | chr5  | 0.04952096  | + T2D risk | 5'UTR   |
| cg26121591 | CPLX2    | chr5  | 0.04952096  | + T2D risk | 1stExon |
| cg01351869 | ST20     | chr15 | 0.049586178 | + T2D risk | 5'UTR   |
| cg01351869 | ST20     | chr15 | 0.049586178 | + T2D risk | 1stExon |



|            |          |       |             |            |         |
|------------|----------|-------|-------------|------------|---------|
| cg02882775 | SLIT3    | chr5  | 0.049597374 | - T2D risk | Body    |
| cg16754633 | RAP1GAP2 | chr17 | 0.049773343 | + T2D risk | Body    |
| cg10556868 | ATXN1    | chr6  | 0.049797957 | + T2D risk | 5'UTR   |
| cg06537894 | MAST1    | chr19 | 0.049811135 | + T2D risk | Body    |
| cg13460297 | DYNC1I2  | chr2  | 0.049832378 | + T2D risk | Body    |
| cg09547226 | KDM4B    | chr19 | 0.049869977 | + T2D risk | Body    |
| cg20793303 | PRKCB    | chr16 | 0.04988844  | + T2D risk | Body    |
| cg17316580 | DLL4     | chr15 | 0.05007634  | - T2D risk | Body    |
| cg08942940 | CNTROB   | chr17 | 0.050174862 | - T2D risk | Body    |
| cg00241074 | PRKAG2   | chr7  | 0.05022253  | - T2D risk | 5'UTR   |
| cg00241074 | PRKAG2   | chr7  | 0.05022253  | - T2D risk | Body    |
| cg08991330 | PLAGL1   | chr6  | 0.050265146 | - T2D risk | 5'UTR   |
| cg18114671 | NOL4     | chr18 | 0.050323409 | + T2D risk | TSS1500 |
| cg06398129 | PRKCE    | chr2  | 0.050374897 | - T2D risk | Body    |
| cg26682701 | CUX1     | chr7  | 0.050437062 | + T2D risk | Body    |
| cg20473250 | PHF21A   | chr11 | 0.050466333 | - T2D risk | Body    |
| cg06544239 | GNA12    | chr7  | 0.050543257 | + T2D risk | Body    |
| cg23021192 | ST20     | chr15 | 0.050710448 | - T2D risk | Body    |
| cg20580885 | KREMEN1  | chr22 | 0.050737043 | - T2D risk | Body    |
| cg02102278 | TENM2    | chr5  | 0.050788153 | + T2D risk | Body    |
| cg10479434 | CLEC16A  | chr16 | 0.050805378 | + T2D risk | Body    |
| cg19095271 | CLOCK    | chr4  | 0.050896788 | - T2D risk | TSS1500 |
| cg19356735 | UBE2K    | chr4  | 0.05092026  | + T2D risk | TSS1500 |
| cg24503846 | PDLIM5   | chr4  | 0.050930901 | + T2D risk | 5'UTR   |
| cg24503846 | PDLIM5   | chr4  | 0.050930901 | + T2D risk | Body    |
| cg09500975 | TJP1     | chr15 | 0.050940876 | - T2D risk | Body    |
| cg01076459 | RAP1GAP2 | chr17 | 0.050964586 | - T2D risk | Body    |
| cg27140914 | WDR48    | chr3  | 0.051005435 | - T2D risk | Body    |
| cg22373676 | UBL3     | chr13 | 0.051018306 | - T2D risk | Body    |
| cg08125682 | CLEC16A  | chr16 | 0.051035282 | - T2D risk | 1stExon |
| cg08125682 | CLEC16A  | chr16 | 0.051035282 | - T2D risk | 5'UTR   |
| cg09054633 | SPOCK1   | chr5  | 0.051079397 | - T2D risk | 5'UTR   |
| cg15433164 | NGLY1    | chr3  | 0.051117608 | - T2D risk | 1stExon |
| cg15433164 | NGLY1    | chr3  | 0.051117608 | - T2D risk | Body    |
| cg15433164 | NGLY1    | chr3  | 0.051117608 | - T2D risk | 5'UTR   |
| cg06795078 | ATXN1    | chr6  | 0.051162637 | - T2D risk | 5'UTR   |
| cg06724937 | SPPL2A   | chr15 | 0.051229613 | - T2D risk | Body    |
| cg00225070 | MTHFS    | chr15 | 0.051298848 | - T2D risk | TSS200  |
| cg20653859 | DIP2C    | chr10 | 0.051385036 | - T2D risk | Body    |
| cg27159421 | DIP2C    | chr10 | 0.051404395 | + T2D risk | Body    |
| cg10862399 | SLIT3    | chr5  | 0.051465238 | + T2D risk | Body    |
| cg16159152 | GRK5     | chr10 | 0.051589219 | + T2D risk | Body    |
| cg12567780 | ANK2     | chr4  | 0.051631825 | - T2D risk | Body    |
| cg27190240 | NGLY1    | chr3  | 0.051673572 | - T2D risk | Body    |
| cg27190240 | OXSM     | chr3  | 0.051673572 | - T2D risk | TSS1500 |
| cg06678279 | ERC2     | chr3  | 0.051760685 | - T2D risk | 1stExon |
| cg06678279 | ERC2     | chr3  | 0.051760685 | - T2D risk | 5'UTR   |
| cg11436846 | PHACTR1  | chr6  | 0.051852663 | + T2D risk | Body    |
| cg22423225 | MAN1A1   | chr6  | 0.051854129 | - T2D risk | Body    |
| cg19272109 | DIP2C    | chr10 | 0.051857481 | + T2D risk | Body    |
| cg25256141 | CUX1     | chr7  | 0.051934254 | + T2D risk | Body    |
| cg14456980 | NCOA7    | chr6  | 0.052081715 | - T2D risk | 5'UTR   |
| cg14456980 | NCOA7    | chr6  | 0.052081715 | - T2D risk | Body    |
| cg13555290 | ANK2     | chr4  | 0.052090467 | + T2D risk | 5'UTR   |
| cg08851719 | NCOA2    | chr8  | 0.052094398 | - T2D risk | TSS1500 |
| cg04579211 | DLL4     | chr15 | 0.05214998  | + T2D risk | Body    |
| cg22983896 | PRKD1    | chr14 | 0.052293429 | - T2D risk | Body    |
| cg15388974 | PRKD1    | chr14 | 0.052348159 | - T2D risk | Body    |
| cg27052183 | RBM4     | chr11 | 0.052492962 | + T2D risk | 3'UTR   |
| cg21184174 | NGF      | chr1  | 0.052587678 | - T2D risk | TSS1500 |
| cg21795654 | NUCB2    | chr11 | 0.052666855 | - T2D risk | TSS200  |
| cg22383872 | TSGA10   | chr2  | 0.052675761 | + T2D risk | TSS200  |
| cg12594140 | PACRG    | chr6  | 0.052691502 | - T2D risk | Body    |
| cg02122937 | DIP2C    | chr10 | 0.052765657 | + T2D risk | Body    |
| cg25475877 | PPP1R12A | chr12 | 0.052785446 | - T2D risk | TSS200  |
| cg25475877 | PPP1R12A | chr12 | 0.052785446 | - T2D risk | 1stExon |
| cg25475877 | PPP1R12A | chr12 | 0.052785446 | - T2D risk | 5'UTR   |
| cg11407215 | UXS1     | chr2  | 0.052888745 | - T2D risk | Body    |
| cg15019810 | ST6GAL1  | chr3  | 0.052900029 | - T2D risk | TSS200  |
| cg16373141 | PRKAG2   | chr7  | 0.05295025  | + T2D risk | 5'UTR   |



|            |           |       |             |            |         |
|------------|-----------|-------|-------------|------------|---------|
| cg16373141 | PRKAG2    | chr7  | 0.05295025  | + T2D risk | Body    |
| cg13731422 | TBC1D5    | chr3  | 0.052985076 | - T2D risk | TSS200  |
| cg08569022 | ACSS2     | chr20 | 0.05302764  | - T2D risk | Body    |
| cg07990556 | FNIP2     | chr4  | 0.053108995 | - T2D risk | Body    |
| cg05053115 | PPFIBP1   | chr12 | 0.053122437 | - T2D risk | Body    |
| cg01765571 | DIP2C     | chr10 | 0.053146998 | - T2D risk | Body    |
| cg21429687 | ANK3      | chr10 | 0.053313693 | + T2D risk | Body    |
| cg14724304 | CUX1      | chr7  | 0.053316567 | - T2D risk | Body    |
| cg00504226 | AGPAT3    | chr21 | 0.053319695 | + T2D risk | 5'UTR   |
| cg00504226 | AGPAT3    | chr21 | 0.053319695 | + T2D risk | TSS1500 |
| cg08051310 | PHACTR1   | chr6  | 0.05337024  | - T2D risk | Body    |
| cg09330105 | TTC28     | chr22 | 0.053376415 | + T2D risk | Body    |
| cg26245302 | PACRG     | chr6  | 0.053383373 | - T2D risk | TSS1500 |
| cg26245302 | PACRG     | chr6  | 0.053383373 | - T2D risk | 5'UTR   |
| cg08549648 | TENM2     | chr5  | 0.053421335 | - T2D risk | Body    |
| cg05065603 | PCYT1A    | chr3  | 0.053467572 | + T2D risk | Body    |
| cg07001793 | ACTN4     | chr19 | 0.053487023 | + T2D risk | Body    |
| cg07001793 | ACTN4     | chr19 | 0.053487023 | + T2D risk | ExonBnd |
| cg02181256 | ULK4      | chr3  | 0.053533908 | - T2D risk | Body    |
| cg08303370 | TSGA10    | chr2  | 0.053691023 | + T2D risk | 5'UTR   |
| cg08303370 | TSGA10    | chr2  | 0.053691023 | + T2D risk | TSS200  |
| cg22410827 | CHID1     | chr11 | 0.053698749 | + T2D risk | 5'UTR   |
| cg26661922 | WWP2      | chr16 | 0.05371152  | - T2D risk | Body    |
| cg03315866 | ACTN4     | chr19 | 0.053731158 | - T2D risk | Body    |
| cg19877499 | RHOA      | chr3  | 0.053748481 | - T2D risk | Body    |
| cg13378134 | HNRNPA2B1 | chr7  | 0.053812174 | - T2D risk | TSS1500 |
| cg15306595 | GAD1      | chr2  | 0.053887368 | - T2D risk | 1stExon |
| cg15306595 | GAD1      | chr2  | 0.053887368 | - T2D risk | 5'UTR   |
| cg27639268 | CUX2      | chr12 | 0.053897586 | + T2D risk | Body    |
| cg08918508 | FLT1      | chr13 | 0.05390446  | - T2D risk | Body    |
| cg18804254 | FAM160A1  | chr4  | 0.053963486 | + T2D risk | Body    |
| cg21931103 | TSGA10    | chr2  | 0.05402884  | - T2D risk | TSS1500 |
| cg05546381 | EFR3A     | chr8  | 0.05403097  | - T2D risk | Body    |
| cg07974823 | CRYL1     | chr13 | 0.054086495 | + T2D risk | Body    |
| cg18882624 | CUX1      | chr7  | 0.054224811 | + T2D risk | Body    |
| cg24567591 | CREBBP    | chr16 | 0.054249375 | - T2D risk | TSS1500 |
| cg04803856 | PACS2     | chr14 | 0.054364475 | - T2D risk | Body    |
| cg14536764 | PRKCE     | chr2  | 0.054394037 | + T2D risk | Body    |
| cg16521917 | CNTNAP2   | chr7  | 0.054507176 | - T2D risk | 5'UTR   |
| cg16521917 | CNTNAP2   | chr7  | 0.054507176 | - T2D risk | 1stExon |
| cg22960833 | KDM4B     | chr19 | 0.054527149 | + T2D risk | 5'UTR   |
| cg18863666 | DIP2C     | chr10 | 0.054542633 | + T2D risk | Body    |
| cg04790450 | LMCD1     | chr3  | 0.054569617 | - T2D risk | Body    |
| cg13834623 | SCGN      | chr6  | 0.054610725 | - T2D risk | TSS200  |
| cg15340582 | ANKHD1    | chr5  | 0.054685125 | + T2D risk | TSS1500 |
| cg06940195 | SRPK2     | chr7  | 0.054806375 | + T2D risk | Body    |
| cg22837512 | NPAT      | chr11 | 0.054815916 | + T2D risk | TSS200  |
| cg10773400 | PICALM    | chr11 | 0.054853832 | + T2D risk | TSS1500 |
| cg10773400 | PICALM    | chr11 | 0.054853832 | + T2D risk | 5'UTR   |
| cg00263806 | SLC9A6    | chrX  | 0.054959936 | + T2D risk | Body    |
| cg26990332 | CALD1     | chr7  | 0.055090767 | - T2D risk | 5'UTR   |
| cg13739115 | GRK5      | chr10 | 0.055147218 | + T2D risk | Body    |
| cg24493060 | SRPK2     | chr7  | 0.055172611 | - T2D risk | Body    |
| cg04594900 | AGPAT3    | chr21 | 0.055192218 | + T2D risk | 5'UTR   |
| cg00367584 | PRKAG2    | chr7  | 0.05521788  | - T2D risk | TSS1500 |
| cg00367584 | PRKAG2    | chr7  | 0.05521788  | - T2D risk | Body    |
| cg04922684 | UNC80     | chr2  | 0.05527002  | - T2D risk | Body    |
| cg09958018 | ULK4      | chr3  | 0.055285637 | - T2D risk | 5'UTR   |
| cg08943997 | PACS2     | chr14 | 0.055290763 | - T2D risk | Body    |
| cg02551232 | INPP4A    | chr2  | 0.055298864 | - T2D risk | 5'UTR   |
| cg10071009 | DENND4C   | chr9  | 0.055315125 | - T2D risk | TSS1500 |
| cg26337222 | FNIP2     | chr4  | 0.055341336 | - T2D risk | Body    |
| cg10652646 | MEIS2     | chr15 | 0.055466719 | + T2D risk | TSS1500 |
| cg01923816 | ARL15     | chr5  | 0.055489871 | + T2D risk | Body    |
| cg00531176 | HMBOX1    | chr8  | 0.055548951 | - T2D risk | 5'UTR   |
| cg00939347 | DIP2C     | chr10 | 0.055571855 | + T2D risk | Body    |
| cg23082773 | RSF1      | chr11 | 0.05570039  | + T2D risk | Body    |
| cg10335826 | RGS7      | chr1  | 0.055838145 | + T2D risk | Body    |
| cg21284038 | COL4A1    | chr13 | 0.055963921 | - T2D risk | Body    |
| cg04633966 | WWP2      | chr16 | 0.055964358 | + T2D risk | ExonBnd |



|            |          |       |             |            |         |
|------------|----------|-------|-------------|------------|---------|
| cg04633966 | WWP2     | chr16 | 0.055964358 | + T2D risk | Body    |
| cg11534240 | SMG7     | chr1  | 0.056036452 | + T2D risk | 5'UTR   |
| cg11534240 | SMG7     | chr1  | 0.056036452 | + T2D risk | Body    |
| cg16814576 | ACTN4    | chr19 | 0.056053084 | + T2D risk | Body    |
| cg16814576 | ACTN4    | chr19 | 0.056053084 | + T2D risk | ExonBnd |
| cg16838957 | ADCY5    | chr3  | 0.056124237 | - T2D risk | Body    |
| cg01022678 | ITGA1    | chr5  | 0.056208359 | - T2D risk | Body    |
| cg09335647 | CNTNAP2  | chr7  | 0.056210496 | - T2D risk | Body    |
| cg23190719 | CALD1    | chr7  | 0.056216556 | + T2D risk | Body    |
| cg23190719 | CALD1    | chr7  | 0.056216556 | + T2D risk | TSS1500 |
| cg13319049 | UBE2K    | chr4  | 0.056273496 | - T2D risk | TSS200  |
| cg05101809 | SLC29A4  | chr7  | 0.05630941  | + T2D risk | Body    |
| cg16951854 | RHOA     | chr3  | 0.056314507 | - T2D risk | 1stExon |
| cg16951854 | RHOA     | chr3  | 0.056314507 | - T2D risk | 5'UTR   |
| cg06440804 | RNF157   | chr17 | 0.056370294 | + T2D risk | Body    |
| cg09355523 | UBL3     | chr13 | 0.056376117 | + T2D risk | Body    |
| cg16872693 | ULK4     | chr3  | 0.056396861 | - T2D risk | 5'UTR   |
| cg14773466 | DIP2C    | chr10 | 0.056475512 | + T2D risk | Body    |
| cg13125822 | GRK5     | chr10 | 0.056549128 | + T2D risk | Body    |
| cg23340957 | RHBDD1   | chr2  | 0.056562199 | - T2D risk | Body    |
| cg09578826 | RAP1GAP2 | chr17 | 0.056567392 | + T2D risk | Body    |
| cg16697062 | EVI5     | chr1  | 0.056573739 | - T2D risk | Body    |
| cg11839163 | CALD1    | chr7  | 0.056614312 | - T2D risk | Body    |
| cg14282407 | CNTROB   | chr17 | 0.056653133 | - T2D risk | 1stExon |
| cg14282407 | CNTROB   | chr17 | 0.056653133 | - T2D risk | 5'UTR   |
| cg22080856 | INPP4A   | chr2  | 0.056666367 | + T2D risk | Body    |
| cg13763577 | UNC80    | chr2  | 0.056701632 | - T2D risk | Body    |
| cg26723848 | SPOCK1   | chr5  | 0.05672027  | + T2D risk | Body    |
| cg23581176 | LAMA4    | chr6  | 0.056800924 | - T2D risk | Body    |
| cg14696996 | NOTCH3   | chr19 | 0.056804155 | + T2D risk | Body    |
| cg21478902 | COL4A1   | chr13 | 0.056934895 | - T2D risk | Body    |
| cg12749890 | ATP8A1   | chr4  | 0.056978322 | + T2D risk | Body    |
| cg25786780 | MAST1    | chr19 | 0.056983505 | + T2D risk | Body    |
| cg17416338 | KDM4B    | chr19 | 0.057026509 | - T2D risk | Body    |
| cg05191928 | GNA12    | chr7  | 0.057066008 | - T2D risk | TSS200  |
| cg10793390 | PRKD1    | chr14 | 0.057107333 | - T2D risk | Body    |
| cg19209588 | NF1      | chr17 | 0.057133628 | + T2D risk | Body    |
| cg14537362 | LMX1B    | chr9  | 0.0571455   | - T2D risk | TSS1500 |
| cg20909611 | POC1B    | chr12 | 0.0572146   | + T2D risk | Body    |
| cg27545052 | SLIT3    | chr5  | 0.057233358 | - T2D risk | Body    |
| cg21508011 | TENM2    | chr5  | 0.057335    | - T2D risk | Body    |
| cg22353116 | CUX1     | chr7  | 0.057414206 | - T2D risk | Body    |
| cg21322636 | RHOA     | chr3  | 0.057447296 | - T2D risk | TSS200  |
| cg11228682 | ATXN1    | chr6  | 0.057487257 | - T2D risk | Body    |
| cg04430362 | CUX1     | chr7  | 0.057507467 | + T2D risk | Body    |
| cg05459517 | ZHX2     | chr8  | 0.057585302 | - T2D risk | 5'UTR   |
| cg20969685 | KIAA1217 | chr10 | 0.05764123  | - T2D risk | TSS200  |
| cg13389229 | RHOA     | chr3  | 0.05765282  | + T2D risk | TSS1500 |
| cg24948802 | KIAA0355 | chr19 | 0.057670972 | - T2D risk | TSS200  |
| cg14562149 | LMX1B    | chr9  | 0.057706143 | - T2D risk | Body    |
| cg23003043 | SLC30A8  | chr8  | 0.057850126 | + T2D risk | 5'UTR   |
| cg25282292 | MGRN1    | chr16 | 0.057930179 | + T2D risk | Body    |
| cg21392975 | ARID2    | chr12 | 0.057988756 | - T2D risk | Body    |
| cg26912640 | RAP1B    | chr12 | 0.057994487 | + T2D risk | 5'UTR   |
| cg21351795 | PKD1     | chr2  | 0.057999265 | - T2D risk | Body    |
| cg07883956 | PDE8A    | chr15 | 0.058020027 | - T2D risk | TSS1500 |
| cg13741289 | LAP3     | chr4  | 0.058030245 | - T2D risk | TSS200  |
| cg14325408 | ARHGAP32 | chr11 | 0.058212521 | + T2D risk | TSS1500 |
| cg16112623 | AGPAT3   | chr21 | 0.058222591 | + T2D risk | 5'UTR   |
| cg01966076 | PACS2    | chr14 | 0.058242026 | - T2D risk | TSS1500 |
| cg23388451 | SLC29A4  | chr7  | 0.058311116 | + T2D risk | Body    |
| cg19466590 | CUL1     | chr7  | 0.058396336 | - T2D risk | 1stExon |
| cg19466590 | CUL1     | chr7  | 0.058396336 | - T2D risk | 5'UTR   |
| cg19539318 | DYNC1I2  | chr2  | 0.058409405 | - T2D risk | 5'UTR   |
| cg16143506 | CNTNAP2  | chr7  | 0.05843683  | + T2D risk | Body    |
| cg04000159 | ATP6V1H  | chr8  | 0.058519775 | - T2D risk | 5'UTR   |
| cg04000159 | ATP6V1H  | chr8  | 0.058519775 | - T2D risk | TSS200  |
| cg04000159 | ATP6V1H  | chr8  | 0.058519775 | - T2D risk | 1stExon |
| cg02654164 | JPH2     | chr20 | 0.058520011 | + T2D risk | Body    |
| cg16514866 | ZHX2     | chr8  | 0.058590508 | - T2D risk | 5'UTR   |



|            |          |       |             |            |         |
|------------|----------|-------|-------------|------------|---------|
| cg15344021 | SGSM2    | chr17 | 0.058601324 | + T2D risk | TSS1500 |
| cg20036294 | ASH1L    | chr1  | 0.0587475   | + T2D risk | Body    |
| cg09075678 | NCOA7    | chr6  | 0.058769544 | + T2D risk | TSS1500 |
| cg21426559 | CUX2     | chr12 | 0.058787016 | - T2D risk | Body    |
| cg03680528 | TSHZ1    | chr18 | 0.058810089 | + T2D risk | Body    |
| cg11588907 | NOL4     | chr18 | 0.05885576  | + T2D risk | TSS1500 |
| cg11588907 | NOL4     | chr18 | 0.05885576  | + T2D risk | Body    |
| cg22322653 | INPP4A   | chr2  | 0.058894543 | + T2D risk | Body    |
| cg03080498 | ATXN1    | chr6  | 0.058895395 | + T2D risk | 5'UTR   |
| cg07035875 | TOX3     | chr16 | 0.058909946 | - T2D risk | 5'UTR   |
| cg07035875 | TOX3     | chr16 | 0.058909946 | - T2D risk | Body    |
| cg18074825 | CHKA     | chr11 | 0.058989792 | - T2D risk | TSS200  |
| cg17554032 | ADCY5    | chr3  | 0.059092356 | + T2D risk | Body    |
| cg17554032 | ADCY5    | chr3  | 0.059092356 | + T2D risk | ExonBnd |
| cg07937514 | TBC1D5   | chr3  | 0.059103904 | - T2D risk | 5'UTR   |
| cg14717331 | KIAA0355 | chr19 | 0.059110005 | - T2D risk | 5'UTR   |
| cg20838039 | CUX1     | chr7  | 0.059143613 | + T2D risk | Body    |
| cg20227627 | PRKCE    | chr2  | 0.059219378 | + T2D risk | Body    |
| cg19524983 | SCAF11   | chr12 | 0.059289351 | - T2D risk | Body    |
| cg01170069 | SUB1     | chr5  | 0.059362133 | - T2D risk | Body    |
| cg02151160 | KCNIP3   | chr2  | 0.059374529 | + T2D risk | Body    |
| cg02463970 | DIP2C    | chr10 | 0.059408035 | + T2D risk | Body    |
| cg07801814 | FLT1     | chr13 | 0.059424884 | - T2D risk | Body    |
| cg27188079 | SSBP2    | chr5  | 0.059441473 | + T2D risk | Body    |
| cg10132348 | KIAA0232 | chr4  | 0.059443513 | - T2D risk | TSS200  |
| cg27272447 | PPFIBP1  | chr12 | 0.059562132 | - T2D risk | 5'UTR   |
| cg02667335 | CHFR     | chr12 | 0.059649961 | + T2D risk | TSS1500 |
| cg25292151 | RAP1GAP2 | chr17 | 0.059700326 | + T2D risk | Body    |
| cg07759052 | HMBX01   | chr8  | 0.059742807 | - T2D risk | 5'UTR   |
| cg15003182 | DDC      | chr7  | 0.059745018 | + T2D risk | Body    |
| cg14438812 | DIP2C    | chr10 | 0.059755853 | + T2D risk | Body    |
| cg06840100 | SSBP2    | chr5  | 0.059875308 | - T2D risk | ExonBnd |
| cg06840100 | SSBP2    | chr5  | 0.059875308 | - T2D risk | Body    |
| cg14276794 | LYVE1    | chr11 | 0.059897442 | - T2D risk | TSS1500 |
| cg20342375 | NPAT     | chr11 | 0.060029412 | - T2D risk | 1stExon |
| cg20342375 | NPAT     | chr11 | 0.060029412 | - T2D risk | 5'UTR   |
| cg21034903 | DYNC1I2  | chr2  | 0.060032884 | + T2D risk | 5'UTR   |
| cg03990813 | ERC2     | chr3  | 0.060051366 | - T2D risk | 3'UTR   |
| cg25933772 | ANK2     | chr4  | 0.060178437 | - T2D risk | 5'UTR   |
| cg10956403 | SPAG9    | chr17 | 0.060336422 | - T2D risk | Body    |
| cg02286270 | ATP8A2   | chr13 | 0.060342465 | - T2D risk | Body    |
| cg20274441 | ITPKB    | chr1  | 0.060410634 | + T2D risk | Body    |
| cg01886570 | ZHX2     | chr8  | 0.060439882 | + T2D risk | Body    |
| cg21643314 | MEIS2    | chr15 | 0.060454021 | - T2D risk | TSS200  |
| cg21643314 | MEIS2    | chr15 | 0.060454021 | - T2D risk | Body    |
| cg21643314 | MEIS2    | chr15 | 0.060454021 | - T2D risk | 5'UTR   |
| cg21827294 | CHFR     | chr12 | 0.060454723 | + T2D risk | Body    |
| cg21848076 | ITGA1    | chr5  | 0.060552553 | - T2D risk | Body    |
| cg20564330 | EFCAB14  | chr1  | 0.060621484 | + T2D risk | Body    |
| cg01965598 | ARL15    | chr5  | 0.060658578 | - T2D risk | TSS1500 |
| cg16385733 | TENM2    | chr5  | 0.060768719 | - T2D risk | Body    |
| cg05420217 | PRKAG2   | chr7  | 0.060809939 | + T2D risk | Body    |
| cg04348857 | RGS7     | chr1  | 0.060826361 | + T2D risk | Body    |
| cg22598607 | AGPAT3   | chr21 | 0.060863624 | - T2D risk | 5'UTR   |
| cg00733767 | UXS1     | chr2  | 0.060900566 | + T2D risk | Body    |
| cg01120308 | PICALM   | chr11 | 0.061022688 | - T2D risk | TSS1500 |
| cg00160667 | PTPRU    | chr1  | 0.061039774 | - T2D risk | Body    |
| cg24443768 | RTN4     | chr2  | 0.061097041 | - T2D risk | Body    |
| cg02676865 | MMS19    | chr10 | 0.061131342 | + T2D risk | TSS1500 |
| cg13637899 | IFT74    | chr9  | 0.061224495 | + T2D risk | 5'UTR   |
| cg24670566 | PDE5A    | chr4  | 0.061304682 | - T2D risk | Body    |
| cg12677723 | WIZ      | chr19 | 0.061354477 | + T2D risk | 5'UTR   |
| cg13599482 | LMX1B    | chr9  | 0.061358952 | + T2D risk | Body    |
| cg16289485 | CUX2     | chr12 | 0.061436179 | - T2D risk | Body    |
| cg20599496 | DIP2C    | chr10 | 0.061439032 | + T2D risk | Body    |
| cg09759619 | NCOR1    | chr17 | 0.061615597 | + T2D risk | Body    |
| cg17918753 | PRKAG2   | chr7  | 0.061642156 | + T2D risk | Body    |
| cg10869360 | PACS2    | chr14 | 0.061679369 | + T2D risk | 5'UTR   |
| cg10869360 | PACS2    | chr14 | 0.061679369 | + T2D risk | Body    |
| cg16416127 | ARL15    | chr5  | 0.061726038 | - T2D risk | Body    |



|            |          |       |             |            |         |
|------------|----------|-------|-------------|------------|---------|
| cg16652181 | ARHGAP32 | chr11 | 0.061730684 | - T2D risk | Body    |
| cg23730151 | DDHD2    | chr8  | 0.061848917 | - T2D risk | Body    |
| cg00735962 | PRKCB    | chr16 | 0.061863931 | + T2D risk | TSS200  |
| cg12381367 | GRK5     | chr10 | 0.061866078 | - T2D risk | Body    |
| cg10502136 | PHACTR1  | chr6  | 0.061875815 | - T2D risk | Body    |
| cg22586777 | FNIP2    | chr4  | 0.061902412 | - T2D risk | Body    |
| cg27421267 | DIP2C    | chr10 | 0.061956411 | - T2D risk | Body    |
| cg06297554 | DIP2C    | chr10 | 0.062078115 | - T2D risk | Body    |
| cg18072147 | DIP2C    | chr10 | 0.062104373 | + T2D risk | Body    |
| cg03951877 | PHACTR1  | chr6  | 0.062248676 | + T2D risk | Body    |
| cg08318174 | ANK3     | chr10 | 0.062274638 | - T2D risk | 1stExon |
| cg08318174 | ANK3     | chr10 | 0.062274638 | - T2D risk | 5'UTR   |
| cg16923402 | GLG1     | chr16 | 0.062511968 | + T2D risk | Body    |
| cg15822966 | NGLY1    | chr3  | 0.062540806 | - T2D risk | Body    |
| cg11345143 | CRYL1    | chr13 | 0.06255048  | + T2D risk | Body    |
| cg02566775 | PLAGL1   | chr6  | 0.06259248  | - T2D risk | 5'UTR   |
| cg21672040 | RHBDD1   | chr2  | 0.062840018 | - T2D risk | TSS1500 |
| cg00943291 | PLEKHG3  | chr14 | 0.062964399 | + T2D risk | Body    |
| cg05952475 | PACRG    | chr6  | 0.062985414 | + T2D risk | Body    |
| cg10753966 | ERC2     | chr3  | 0.063360927 | + T2D risk | 3'UTR   |
| cg07031120 | PHACTR1  | chr6  | 0.063373827 | - T2D risk | TSS1500 |
| cg14819891 | SLIT3    | chr5  | 0.063690391 | - T2D risk | Body    |
| cg08430686 | APBA1    | chr9  | 0.063717401 | - T2D risk | 3'UTR   |
| cg06731842 | UBL3     | chr13 | 0.063802842 | - T2D risk | Body    |
| cg20893537 | GRK5     | chr10 | 0.063860241 | + T2D risk | Body    |
| cg04503332 | KDM4B    | chr19 | 0.063907837 | + T2D risk | 5'UTR   |
| cg04935465 | ANK3     | chr10 | 0.063917238 | + T2D risk | Body    |
| cg06083412 | NCOA2    | chr8  | 0.063947138 | + T2D risk | 5'UTR   |
| cg12832649 | SPOCK1   | chr5  | 0.064061529 | - T2D risk | 5'UTR   |
| cg14399236 | TSGA10   | chr2  | 0.064065608 | - T2D risk | TSS1500 |
| cg23449764 | CHID1    | chr11 | 0.06410476  | + T2D risk | TSS1500 |
| cg02220924 | KIAA0232 | chr4  | 0.064152431 | + T2D risk | Body    |
| cg23065882 | STX6     | chr1  | 0.06419086  | + T2D risk | Body    |
| cg22513805 | SLIT3    | chr5  | 0.064329452 | - T2D risk | Body    |
| cg11702143 | RHOA     | chr3  | 0.064333978 | - T2D risk | 5'UTR   |
| cg08633479 | USP29    | chr19 | 0.064341902 | - T2D risk | TSS1500 |
| cg01077501 | CALD1    | chr7  | 0.064370984 | + T2D risk | Body    |
| cg08135810 | EFCAB14  | chr1  | 0.064411175 | - T2D risk | TSS1500 |
| cg03095884 | KIAA1217 | chr10 | 0.064447596 | - T2D risk | 5'UTR   |
| cg12955895 | ACTN4    | chr19 | 0.064468643 | - T2D risk | TSS200  |
| cg23447136 | ATP6V1H  | chr8  | 0.064531705 | - T2D risk | TSS200  |
| cg23447136 | ATP6V1H  | chr8  | 0.064531705 | - T2D risk | 5'UTR   |
| cg23447136 | ATP6V1H  | chr8  | 0.064531705 | - T2D risk | 1stExon |
| cg04911819 | KIAA1217 | chr10 | 0.064601795 | - T2D risk | 5'UTR   |
| cg04911819 | KIAA1217 | chr10 | 0.064601795 | - T2D risk | Body    |
| cg25065191 | SMG7     | chr1  | 0.064604139 | + T2D risk | 5'UTR   |
| cg25065191 | SMG7     | chr1  | 0.064604139 | + T2D risk | Body    |
| cg13051970 | DDC      | chr7  | 0.064627863 | + T2D risk | TSS1500 |
| cg13051970 | DDC      | chr7  | 0.064627863 | + T2D risk | 5'UTR   |
| cg26961479 | ANK3     | chr10 | 0.064639265 | - T2D risk | Body    |
| cg19619882 | ZHX2     | chr8  | 0.064686726 | - T2D risk | 5'UTR   |
| cg20567148 | CUX1     | chr7  | 0.064736044 | + T2D risk | Body    |
| cg08801671 | RBM4     | chr11 | 0.064854237 | - T2D risk | TSS200  |
| cg07501939 | CDH22    | chr20 | 0.064890222 | + T2D risk | 5'UTR   |
| cg04171526 | GLG1     | chr16 | 0.06490355  | - T2D risk | Body    |
| cg24450494 | ATRNL1   | chr10 | 0.064918494 | - T2D risk | TSS1500 |
| cg22516717 | AGPAT3   | chr21 | 0.064929521 | + T2D risk | 5'UTR   |
| cg16550555 | ARL8B    | chr3  | 0.065032533 | + T2D risk | Body    |
| cg16535796 | DYNC111  | chr7  | 0.065060135 | + T2D risk | Body    |
| cg27324928 | KIAA1109 | chr4  | 0.0650992   | - T2D risk | Body    |
| cg12255246 | NCOA7    | chr6  | 0.065115546 | - T2D risk | 5'UTR   |
| cg05068987 | MAST1    | chr19 | 0.065116667 | + T2D risk | Body    |
| cg02160692 | FBXO11   | chr2  | 0.065146849 | - T2D risk | 5'UTR   |
| cg24816286 | ATP6V1H  | chr8  | 0.065156802 | + T2D risk | Body    |
| cg09808639 | GRK5     | chr10 | 0.065194198 | + T2D risk | Body    |
| cg04257889 | PRKAG2   | chr7  | 0.065194542 | - T2D risk | TSS1500 |
| cg09097923 | RSF1     | chr11 | 0.065212857 | - T2D risk | Body    |
| cg22007448 | RSF1     | chr11 | 0.065218385 | + T2D risk | Body    |
| cg12524865 | CUX1     | chr7  | 0.06523324  | + T2D risk | Body    |
| cg01432450 | ACTN4    | chr19 | 0.065266759 | + T2D risk | Body    |



|            |         |       |             |            |         |
|------------|---------|-------|-------------|------------|---------|
| cg20449833 | RHOQ    | chr2  | 0.065406323 | - T2D risk | 1stExon |
| cg22240188 | SLIT3   | chr5  | 0.065580486 | + T2D risk | Body    |
| cg15733028 | USP53   | chr4  | 0.06569399  | + T2D risk | 5'UTR   |
| cg00248174 | RET     | chr10 | 0.065715353 | - T2D risk | Body    |
| cg19261940 | SKAP1   | chr17 | 0.065812642 | + T2D risk | Body    |
| cg05813079 | PRKD1   | chr14 | 0.065847835 | + T2D risk | Body    |
| cg02402946 | CRYL1   | chr13 | 0.065870885 | - T2D risk | Body    |
| cg06985534 | MAN1A2  | chr1  | 0.065905837 | - T2D risk | TSS1500 |
| cg12072445 | RANBP17 | chr5  | 0.06590638  | + T2D risk | Body    |
| cg05204898 | INPP4A  | chr2  | 0.06597766  | + T2D risk | Body    |
| cg24323734 | RHBDD1  | chr2  | 0.066089336 | + T2D risk | ExonBnd |
| cg24323734 | RHBDD1  | chr2  | 0.066089336 | + T2D risk | Body    |
| cg10823320 | CUX2    | chr12 | 0.06615071  | + T2D risk | Body    |
| cg13173125 | PICALM  | chr11 | 0.066203106 | - T2D risk | TSS1500 |
| cg13173125 | PICALM  | chr11 | 0.066203106 | - T2D risk | 5'UTR   |
| cg17448192 | ST6GAL1 | chr3  | 0.066250517 | - T2D risk | 5'UTR   |
| cg23279833 | RNF157  | chr17 | 0.066552097 | + T2D risk | Body    |
| cg08351324 | ANKHD1  | chr5  | 0.066573896 | - T2D risk | TSS200  |
| cg11791922 | ARL15   | chr5  | 0.066594213 | - T2D risk | Body    |
| cg26874693 | CUX2    | chr12 | 0.066653117 | - T2D risk | Body    |
| cg12394112 | SEZ6L   | chr22 | 0.066671099 | + T2D risk | Body    |
| cg11693202 | RET     | chr10 | 0.066708632 | + T2D risk | Body    |
| cg17075098 | UBL3    | chr13 | 0.066839075 | + T2D risk | Body    |
| cg00070105 | ATP8A2  | chr13 | 0.067025024 | - T2D risk | Body    |
| cg07276957 | ARID2   | chr12 | 0.067050442 | - T2D risk | TSS1500 |
| cg19632186 | NCOR1   | chr17 | 0.067117464 | + T2D risk | Body    |
| cg00093930 | PTPRU   | chr1  | 0.067253915 | + T2D risk | Body    |
| cg06059332 | CNTNAP2 | chr7  | 0.067255343 | + T2D risk | Body    |
| cg17465343 | SCARB2  | chr4  | 0.067275847 | - T2D risk | Body    |
| cg24988884 | UBL3    | chr13 | 0.067377946 | - T2D risk | 1stExon |
| cg24988884 | UBL3    | chr13 | 0.067377946 | - T2D risk | 5'UTR   |
| cg22884793 | SKAP1   | chr17 | 0.067526165 | - T2D risk | Body    |
| cg20200091 | ARPP19  | chr15 | 0.067536717 | + T2D risk | 5'UTR   |
| cg20200091 | ARPP19  | chr15 | 0.067536717 | + T2D risk | 1stExon |
| cg20200091 | ARPP19  | chr15 | 0.067536717 | + T2D risk | TSS200  |
| cg22732210 | PDE3A   | chr12 | 0.067569156 | + T2D risk | Body    |
| cg05296590 | IFT74   | chr9  | 0.067620431 | - T2D risk | TSS1500 |
| cg05296590 | IFT74   | chr9  | 0.067620431 | - T2D risk | TSS200  |
| cg24606374 | NCOA7   | chr6  | 0.067663896 | + T2D risk | 5'UTR   |
| cg03951374 | MEIS2   | chr15 | 0.067707897 | + T2D risk | 5'UTR   |
| cg03951374 | MEIS2   | chr15 | 0.067707897 | + T2D risk | 1stExon |
| cg03951374 | MEIS2   | chr15 | 0.067707897 | + T2D risk | Body    |
| cg13881958 | ULK4    | chr3  | 0.06771705  | - T2D risk | 5'UTR   |
| cg09605217 | WWP2    | chr16 | 0.067775798 | + T2D risk | Body    |
| cg20995188 | UXS1    | chr2  | 0.067821804 | + T2D risk | Body    |
| cg20828207 | PLAGL1  | chr6  | 0.067844174 | + T2D risk | 5'UTR   |
| cg10776914 | ATXN1   | chr6  | 0.06795167  | - T2D risk | 5'UTR   |
| cg27413543 | SEC31A  | chr4  | 0.067978282 | - T2D risk | 5'UTR   |
| cg01032359 | CUX2    | chr12 | 0.068016538 | - T2D risk | Body    |
| cg19820851 | NUP98   | chr11 | 0.06803561  | - T2D risk | Body    |
| cg27100547 | CREBBP  | chr16 | 0.068064021 | + T2D risk | Body    |
| cg19563415 | DIP2C   | chr10 | 0.068064904 | - T2D risk | Body    |
| cg22630180 | CREBBP  | chr16 | 0.068256271 | + T2D risk | Body    |
| cg16573071 | CMTR1   | chr6  | 0.068323841 | + T2D risk | Body    |
| cg11076143 | TBC1D5  | chr3  | 0.068373439 | + T2D risk | Body    |
| cg15927566 | ATP8A1  | chr4  | 0.068381043 | + T2D risk | Body    |
| cg21579197 | MEIS2   | chr15 | 0.068490327 | - T2D risk | Body    |
| cg19879479 | LCA5    | chr6  | 0.068521265 | + T2D risk | 5'UTR   |
| cg19210045 | SSB     | chr2  | 0.068540165 | - T2D risk | 5'UTR   |
| cg13314908 | PRKCE   | chr2  | 0.068544315 | + T2D risk | Body    |
| cg18887119 | CREBBP  | chr16 | 0.06865954  | + T2D risk | Body    |
| cg10820926 | PRKD1   | chr14 | 0.06869299  | - T2D risk | TSS1500 |
| cg06924803 | CUX1    | chr7  | 0.068767377 | - T2D risk | Body    |
| cg01483459 | NOTCH3  | chr19 | 0.068788441 | + T2D risk | Body    |
| cg13342014 | AGPAT3  | chr21 | 0.068865716 | + T2D risk | 5'UTR   |
| cg05617873 | KCNIP3  | chr2  | 0.068936953 | + T2D risk | Body    |
| cg09186074 | PACRG   | chr6  | 0.06894508  | - T2D risk | TSS1500 |
| cg25300699 | MYO6    | chr6  | 0.068963437 | + T2D risk | 5'UTR   |
| cg01067813 | CNTNAP2 | chr7  | 0.069027994 | - T2D risk | Body    |
| cg23489038 | CUX2    | chr12 | 0.069105402 | - T2D risk | Body    |



|            |                 |       |             |            |         |
|------------|-----------------|-------|-------------|------------|---------|
| cg18157349 | <i>PTP4A2</i>   | chr1  | 0.069221921 | + T2D risk | 5'UTR   |
| cg21388639 | <i>FNIP2</i>    | chr4  | 0.069255238 | - T2D risk | Body    |
| cg18641731 | <i>ITGB1</i>    | chr10 | 0.069310047 | + T2D risk | TSS1500 |
| cg01146238 | <i>RTN4</i>     | chr2  | 0.069322036 | - T2D risk | Body    |
| cg15468403 | <i>PDLIM5</i>   | chr4  | 0.069340547 | - T2D risk | 5'UTR   |
| cg15468403 | <i>PDLIM5</i>   | chr4  | 0.069340547 | - T2D risk | Body    |
| cg08801806 | <i>CPLX2</i>    | chr5  | 0.069356209 | + T2D risk | TSS1500 |
| cg08801806 | <i>CPLX2</i>    | chr5  | 0.069356209 | + T2D risk | 5'UTR   |
| cg07835844 | <i>PRKCE</i>    | chr2  | 0.069412149 | + T2D risk | Body    |
| cg17419619 | <i>CUX1</i>     | chr7  | 0.069458827 | - T2D risk | Body    |
| cg07637515 | <i>ANK3</i>     | chr10 | 0.06948156  | - T2D risk | TSS200  |
| cg07637515 | <i>ANK3</i>     | chr10 | 0.06948156  | - T2D risk | Body    |
| cg08066991 | <i>CADM1</i>    | chr11 | 0.06948238  | - T2D risk | TSS1500 |
| cg15874270 | <i>KIAA1109</i> | chr4  | 0.069570946 | + T2D risk | Body    |
| cg16859636 | <i>DIP2C</i>    | chr10 | 0.069635188 | - T2D risk | Body    |
| cg27356916 | <i>PRKCE</i>    | chr2  | 0.069644232 | - T2D risk | Body    |
| cg05424366 | <i>GLA</i>      | chrX  | 0.069771414 | - T2D risk | TSS200  |
| cg16975584 | <i>CNTNAP2</i>  | chr7  | 0.069918452 | - T2D risk | Body    |
| cg14932349 | <i>CREBBP</i>   | chr16 | 0.069972832 | + T2D risk | Body    |
| cg14790078 | <i>ATP8A2</i>   | chr13 | 0.070011735 | - T2D risk | Body    |
| cg25637520 | <i>KDM4B</i>    | chr19 | 0.070022081 | - T2D risk | Body    |
| cg22498565 | <i>ERC2</i>     | chr3  | 0.070078335 | + T2D risk | 3'UTR   |
| cg07703189 | <i>SPAG9</i>    | chr17 | 0.070153152 | + T2D risk | Body    |
| cg03431155 | <i>CUX1</i>     | chr7  | 0.070154572 | + T2D risk | Body    |
| cg01498940 | <i>CLEC16A</i>  | chr16 | 0.070179554 | - T2D risk | Body    |
| cg25301180 | <i>ERC2</i>     | chr3  | 0.070197034 | - T2D risk | 5'UTR   |
| cg07913806 | <i>KIAA1217</i> | chr10 | 0.07027319  | + T2D risk | 5'UTR   |
| cg26181622 | <i>TSC22D1</i>  | chr13 | 0.070309057 | - T2D risk | Body    |
| cg26181622 | <i>TSC22D1</i>  | chr13 | 0.070309057 | - T2D risk | TSS200  |
| cg14870223 | <i>WDR48</i>    | chr3  | 0.070366471 | - T2D risk | TSS1500 |
| cg03315649 | <i>KDM4B</i>    | chr19 | 0.07049326  | + T2D risk | Body    |
| cg21543067 | <i>ATXN1</i>    | chr6  | 0.070527267 | + T2D risk | 5'UTR   |
| cg03436619 | <i>TJP1</i>     | chr15 | 0.07058048  | + T2D risk | Body    |
| cg10982015 | <i>RAP1B</i>    | chr12 | 0.070708357 | + T2D risk | TSS200  |
| cg21047761 | <i>RAP2A</i>    | chr13 | 0.070729395 | + T2D risk | Body    |
| cg26633278 | <i>JPH2</i>     | chr20 | 0.070773494 | - T2D risk | Body    |
| cg05029456 | <i>COL4A1</i>   | chr13 | 0.070784182 | - T2D risk | Body    |
| cg11199097 | <i>DIP2C</i>    | chr10 | 0.07090778  | - T2D risk | Body    |
| cg22071344 | <i>FBXO11</i>   | chr2  | 0.070931543 | - T2D risk | TSS200  |
| cg20177355 | <i>MEIS2</i>    | chr15 | 0.070972495 | - T2D risk | Body    |
| cg07624399 | <i>MAN1A1</i>   | chr6  | 0.071130676 | + T2D risk | Body    |
| cg12811648 | <i>CHFR</i>     | chr12 | 0.071145347 | + T2D risk | Body    |
| cg11284316 | <i>UNC80</i>    | chr2  | 0.071151578 | - T2D risk | TSS1500 |
| cg21030186 | <i>ST8SIA1</i>  | chr12 | 0.07128409  | + T2D risk | Body    |
| cg06484340 | <i>WIZ</i>      | chr19 | 0.071413772 | - T2D risk | Body    |
| cg02899718 | <i>DACH1</i>    | chr13 | 0.071493272 | - T2D risk | TSS200  |
| cg27422872 | <i>TTC28</i>    | chr22 | 0.071618047 | - T2D risk | Body    |
| cg19922774 | <i>DIP2C</i>    | chr10 | 0.07165762  | - T2D risk | Body    |
| cg17012439 | <i>ANK3</i>     | chr10 | 0.071742221 | - T2D risk | Body    |
| cg20049294 | <i>COX6A1</i>   | chr12 | 0.071769294 | + T2D risk | TSS1500 |
| cg12777520 | <i>LMX1B</i>    | chr9  | 0.071798391 | - T2D risk | Body    |
| cg15720343 | <i>HMBOX1</i>   | chr8  | 0.071826654 | + T2D risk | 5'UTR   |
| cg19032370 | <i>EVI5</i>     | chr1  | 0.071926164 | + T2D risk | Body    |
| cg15440158 | <i>CNTNAP2</i>  | chr7  | 0.071954791 | + T2D risk | Body    |
| cg19744947 | <i>NGLY1</i>    | chr3  | 0.072085024 | - T2D risk | 1stExon |
| cg19744947 | <i>OXSM</i>     | chr3  | 0.072085024 | - T2D risk | TSS200  |
| cg19744947 | <i>NGLY1</i>    | chr3  | 0.072085024 | - T2D risk | 5'UTR   |
| cg02993324 | <i>TBC1D5</i>   | chr3  | 0.072184197 | - T2D risk | Body    |
| cg20300093 | <i>ADCY5</i>    | chr3  | 0.072258673 | + T2D risk | Body    |
| cg19412649 | <i>ADCY5</i>    | chr3  | 0.072303072 | - T2D risk | Body    |
| cg18271538 | <i>RGS7</i>     | chr1  | 0.07234355  | - T2D risk | TSS1500 |
| cg05764011 | <i>DIP2C</i>    | chr10 | 0.072402292 | + T2D risk | Body    |
| cg27271216 | <i>SLIT3</i>    | chr5  | 0.072432714 | + T2D risk | Body    |
| cg25289587 | <i>ULK4</i>     | chr3  | 0.07257705  | + T2D risk | Body    |
| cg00569467 | <i>PPP1R12A</i> | chr12 | 0.072601162 | + T2D risk | Body    |
| cg00569467 | <i>PPP1R12A</i> | chr12 | 0.072601162 | + T2D risk | 5'UTR   |
| cg26084484 | <i>EIF4EBP3</i> | chr5  | 0.072621689 | - T2D risk | TSS200  |
| cg19218679 | <i>CUX2</i>     | chr12 | 0.072665179 | + T2D risk | Body    |
| cg15119553 | <i>ZDHHC2</i>   | chr8  | 0.07277232  | + T2D risk | Body    |
| cg26714410 | <i>TSC22D1</i>  | chr13 | 0.072858287 | + T2D risk | 1stExon |



|               |          |       |             |            |         |
|---------------|----------|-------|-------------|------------|---------|
| cg11200635    | RET      | chr10 | 0.072913128 | + T2D risk | Body    |
| cg06915371    | FAM160A1 | chr4  | 0.072923564 | - T2D risk | 5'UTR   |
| cg09125924    | PRKAG2   | chr7  | 0.072956353 | - T2D risk | Body    |
| cg00218203    | RNF157   | chr17 | 0.072956888 | + T2D risk | Body    |
| cg14270670    | PLAGL1   | chr6  | 0.072978852 | + T2D risk | 5'UTR   |
| cg14877165    | SLC30A8  | chr8  | 0.073036812 | - T2D risk | 5'UTR   |
| cg07238071    | TTC28    | chr22 | 0.073042719 | + T2D risk | Body    |
| cg17323493    | PRKAG2   | chr7  | 0.073134754 | - T2D risk | 5'UTR   |
| cg17323493    | PRKAG2   | chr7  | 0.073134754 | - T2D risk | 1stExon |
| cg01105969    | UXS1     | chr2  | 0.073176454 | + T2D risk | Body    |
| cg09638638    | ROBO2    | chr3  | 0.073193261 | - T2D risk | Body    |
| cg15637465    | SLIT3    | chr5  | 0.07322094  | - T2D risk | TSS200  |
| cg04265219    | CALD1    | chr7  | 0.073305919 | + T2D risk | Body    |
| cg10523019    | RHBDD1   | chr2  | 0.073595037 | - T2D risk | TSS1500 |
| cg06805542    | ATP6V1A  | chr3  | 0.07364886  | + T2D risk | TSS200  |
| cg16884529    | TSGA10   | chr2  | 0.073773119 | + T2D risk | 5'UTR   |
| cg24169326    | RAP1GAP2 | chr17 | 0.073899435 | + T2D risk | Body    |
| cg08549604    | PRKCE    | chr2  | 0.07402194  | - T2D risk | Body    |
| cg20973743    | GALK2    | chr15 | 0.074032168 | + T2D risk | TSS200  |
| cg13806256    | PDE8A    | chr15 | 0.074105191 | + T2D risk | 5'UTR   |
| cg13806256    | PDE8A    | chr15 | 0.074105191 | + T2D risk | Body    |
| cg09666988    | TMEM150C | chr4  | 0.074181459 | - T2D risk | 5'UTR   |
| cg16556156    | CLEC16A  | chr16 | 0.074201642 | + T2D risk | Body    |
| cg21303386    | RGS7     | chr1  | 0.074285412 | - T2D risk | 1stExon |
| cg21303386    | RGS7     | chr1  | 0.074285412 | - T2D risk | 5'UTR   |
| cg05621401    | RET      | chr10 | 0.074410639 | + T2D risk | TSS1500 |
| cg00370962    | TBC1D5   | chr3  | 0.074425388 | - T2D risk | 3'UTR   |
| cg27493411    | CUX1     | chr7  | 0.074461996 | - T2D risk | Body    |
| cg14246949    | RNF157   | chr17 | 0.074509339 | + T2D risk | Body    |
| cg06062145    | KIAA0232 | chr4  | 0.074524693 | + T2D risk | Body    |
| cg09314071    | PDE8A    | chr15 | 0.074548039 | - T2D risk | TSS200  |
| cg19715936    | DDC      | chr7  | 0.074626311 | + T2D risk | TSS1500 |
| cg19277832    | FAM160A1 | chr4  | 0.07472304  | - T2D risk | Body    |
| cg03164627    | KDM4B    | chr19 | 0.074769048 | + T2D risk | Body    |
| cg02728819    | SEZ6L    | chr22 | 0.074806226 | - T2D risk | Body    |
| cg14933993    | AGPAT3   | chr21 | 0.074852159 | - T2D risk | 5'UTR   |
| cg10891242    | UBE2K    | chr4  | 0.07492237  | - T2D risk | Body    |
| ch.12.917204F | ARID2    | chr12 | 0.074941401 | - T2D risk | Body    |
| cg25255793    | SPOCK1   | chr5  | 0.074952859 | + T2D risk | Body    |
| cg21883853    | IFT74    | chr9  | 0.074961105 | - T2D risk | 5'UTR   |
| cg21883853    | IFT74    | chr9  | 0.074961105 | - T2D risk | 1stExon |
| cg24109744    | KDM4B    | chr19 | 0.074993548 | + T2D risk | Body    |
| cg27653304    | TOP2A    | chr17 | 0.075007778 | - T2D risk | TSS1500 |
| cg02588451    | ITPKB    | chr1  | 0.075151246 | + T2D risk | Body    |
| cg03898692    | LMX1B    | chr9  | 0.075169045 | + T2D risk | Body    |
| cg25949390    | SPOCK1   | chr5  | 0.075193644 | - T2D risk | Body    |
| cg04842268    | ADCY5    | chr3  | 0.075387477 | + T2D risk | Body    |
| cg04842268    | ADCY5    | chr3  | 0.075387477 | + T2D risk | TSS1500 |
| cg11889652    | ACSS2    | chr20 | 0.075425361 | + T2D risk | TSS1500 |
| cg08448413    | ZRANB1   | chr10 | 0.075619282 | - T2D risk | Body    |
| cg07562773    | TTC28    | chr22 | 0.075657123 | + T2D risk | Body    |
| cg09030501    | PICALM   | chr11 | 0.075661978 | + T2D risk | Body    |
| cg09250423    | MGRN1    | chr16 | 0.075707894 | + T2D risk | Body    |
| cg09736391    | FLT1     | chr13 | 0.0757257   | - T2D risk | Body    |
| cg24124245    | ATXN1    | chr6  | 0.075782349 | - T2D risk | 5'UTR   |
| cg23855392    | MTHFS    | chr15 | 0.075828605 | - T2D risk | TSS1500 |
| cg00671200    | ITPKB    | chr1  | 0.075833869 | + T2D risk | Body    |
| cg14820288    | TJP1     | chr15 | 0.076030013 | - T2D risk | TSS200  |
| cg14820288    | TJP1     | chr15 | 0.076030013 | - T2D risk | Body    |
| cg06387496    | GNA12    | chr7  | 0.076052966 | - T2D risk | Body    |
| cg27515949    | ARID2    | chr12 | 0.076095445 | - T2D risk | TSS1500 |
| cg15799238    | ST6GAL1  | chr3  | 0.076185946 | + T2D risk | Body    |
| cg15799238    | ST6GAL1  | chr3  | 0.076185946 | + T2D risk | 5'UTR   |
| cg21763405    | PACRG    | chr6  | 0.076190192 | - T2D risk | Body    |
| cg08995547    | PRKCE    | chr2  | 0.076265412 | + T2D risk | Body    |
| cg10886161    | KDM4B    | chr19 | 0.076283923 | + T2D risk | TSS1500 |
| cg07330094    | HMBX1    | chr8  | 0.076477871 | + T2D risk | TSS1500 |
| cg16402822    | SLIT3    | chr5  | 0.076495768 | - T2D risk | Body    |
| cg04610971    | FLT1     | chr13 | 0.076526419 | - T2D risk | Body    |
| cg01881193    | GLG1     | chr16 | 0.076541038 | + T2D risk | Body    |



|               |          |       |             |            |         |
|---------------|----------|-------|-------------|------------|---------|
| cg24461627    | DIP2C    | chr10 | 0.076593027 | + T2D risk | Body    |
| cg16604136    | NUF2     | chr1  | 0.076701275 | + T2D risk | TSS1500 |
| cg14401320    | PACS2    | chr14 | 0.076869675 | - T2D risk | Body    |
| cg10216586    | AMD1     | chr6  | 0.076879143 | - T2D risk | TSS200  |
| cg22909935    | SPOCK1   | chr5  | 0.077000863 | - T2D risk | Body    |
| cg23274381    | WIZ      | chr19 | 0.077070561 | + T2D risk | TSS1500 |
| cg13789186    | TSGA10   | chr2  | 0.077147139 | - T2D risk | TSS200  |
| cg08002929    | FLT1     | chr13 | 0.077276236 | + T2D risk | Body    |
| cg20227944    | CUX2     | chr12 | 0.077285738 | + T2D risk | Body    |
| cg00690392    | ENAH     | chr1  | 0.077299561 | + T2D risk | Body    |
| cg06129867    | ACTN4    | chr19 | 0.07737733  | - T2D risk | Body    |
| cg06086267    | CUX1     | chr7  | 0.077397385 | - T2D risk | Body    |
| cg06834689    | PACRG    | chr6  | 0.07749633  | + T2D risk | Body    |
| cg21078344    | KDM4B    | chr19 | 0.077647686 | + T2D risk | TSS1500 |
| cg14479889    | APC      | chr5  | 0.077777144 | - T2D risk | 5'UTR   |
| cg14479889    | APC      | chr5  | 0.077777144 | - T2D risk | TSS200  |
| cg01535834    | PLEKHG3  | chr14 | 0.077805892 | + T2D risk | Body    |
| cg17082299    | SLC7A2   | chr8  | 0.077819285 | + T2D risk | 5'UTR   |
| cg05510976    | ATP8A2   | chr13 | 0.077867349 | - T2D risk | Body    |
| cg19760211    | DIP2C    | chr10 | 0.077940146 | + T2D risk | Body    |
| cg04597111    | PDE8A    | chr15 | 0.078012093 | + T2D risk | TSS200  |
| cg09310194    | ANK3     | chr10 | 0.078020829 | - T2D risk | Body    |
| cg22273925    | KIAA1217 | chr10 | 0.078086864 | - T2D risk | 5'UTR   |
| cg02558625    | COL4A1   | chr13 | 0.078144693 | - T2D risk | Body    |
| cg09864285    | WDR48    | chr3  | 0.078405389 | - T2D risk | Body    |
| cg10702789    | PHACTR1  | chr6  | 0.078406285 | + T2D risk | Body    |
| cg12252378    | YWHAQ    | chr2  | 0.078427246 | - T2D risk | Body    |
| cg23409774    | CPLX2    | chr5  | 0.078470349 | - T2D risk | 5'UTR   |
| cg20338628    | DDHD2    | chr8  | 0.078515333 | - T2D risk | 5'UTR   |
| cg20338628    | DDHD2    | chr8  | 0.078515333 | - T2D risk | 1stExon |
| cg20338628    | DDHD2    | chr8  | 0.078515333 | - T2D risk | TSS1500 |
| cg20513448    | SRPK2    | chr7  | 0.078556248 | + T2D risk | Body    |
| cg26284782    | PRKAG2   | chr7  | 0.078565731 | + T2D risk | TSS1500 |
| cg26284782    | PRKAG2   | chr7  | 0.078565731 | + T2D risk | Body    |
| cg04296126    | CUX1     | chr7  | 0.078590486 | - T2D risk | Body    |
| cg10501629    | ATP2B1   | chr12 | 0.078635099 | + T2D risk | 1stExon |
| cg07988148    | SEZ6L    | chr22 | 0.07866379  | + T2D risk | Body    |
| cg06035718    | PPFIBP1  | chr12 | 0.078719526 | + T2D risk | 5'UTR   |
| cg00647165    | WIZ      | chr19 | 0.078724244 | + T2D risk | Body    |
| ch.8.2442961R | ZHX2     | chr8  | 0.07878747  | - T2D risk | 3'UTR   |
| cg04670553    | ST20     | chr15 | 0.078791033 | + T2D risk | TSS1500 |
| cg13398842    | SPOCK1   | chr5  | 0.078799108 | + T2D risk | Body    |
| cg00222867    | PDE8A    | chr15 | 0.07880154  | + T2D risk | Body    |
| cg02466933    | YWHAQ    | chr2  | 0.07880836  | - T2D risk | Body    |
| cg20679659    | NCOA2    | chr8  | 0.078851787 | + T2D risk | Body    |
| cg06499487    | NCOA2    | chr8  | 0.078859934 | + T2D risk | 5'UTR   |
| cg27433898    | PACRG    | chr6  | 0.078894472 | + T2D risk | Body    |
| cg27557698    | ATP2B1   | chr12 | 0.078918682 | + T2D risk | Body    |
| cg19313221    | KDM4B    | chr19 | 0.078925451 | + T2D risk | Body    |
| cg02512806    | CREBBP   | chr16 | 0.078949061 | + T2D risk | 3'UTR   |
| cg02425445    | PRKCB    | chr16 | 0.079010728 | - T2D risk | Body    |
| cg27190034    | RHBDD1   | chr2  | 0.079054792 | - T2D risk | TSS1500 |
| cg14877066    | RBBP6    | chr16 | 0.079071544 | - T2D risk | TSS200  |
| cg07337544    | KCNIP3   | chr2  | 0.079133682 | + T2D risk | Body    |
| cg00002176    | CDH22    | chr20 | 0.079158545 | + T2D risk | 5'UTR   |
| cg23471095    | UXS1     | chr2  | 0.079206535 | + T2D risk | Body    |
| cg21071625    | ACTN4    | chr19 | 0.079248101 | + T2D risk | Body    |
| cg24947064    | ITGA1    | chr5  | 0.0793508   | + T2D risk | Body    |
| cg15937315    | ATXN1    | chr6  | 0.079379232 | + T2D risk | 5'UTR   |
| cg01169610    | INPP4A   | chr2  | 0.079480616 | - T2D risk | 5'UTR   |
| cg16977735    | DIP2C    | chr10 | 0.079519089 | - T2D risk | Body    |
| cg02630660    | ULK4     | chr3  | 0.079636572 | + T2D risk | Body    |
| cg06342430    | ACSS2    | chr20 | 0.079653693 | - T2D risk | TSS1500 |
| cg20543478    | ROBO2    | chr3  | 0.079709971 | - T2D risk | 1stExon |
| cg20543478    | ROBO2    | chr3  | 0.079709971 | - T2D risk | Body    |
| cg05078268    | YWHAQ    | chr2  | 0.079729383 | + T2D risk | Body    |
| cg26832686    | WWP2     | chr16 | 0.079842303 | - T2D risk | TSS1500 |
| cg26832686    | WWP2     | chr16 | 0.079842303 | - T2D risk | Body    |
| cg24750905    | KIAA0355 | chr19 | 0.079879484 | + T2D risk | 5'UTR   |
| cg27170206    | CLEC16A  | chr16 | 0.079906097 | + T2D risk | 3'UTR   |



|               |          |       |             |            |         |
|---------------|----------|-------|-------------|------------|---------|
| cg09436970    | SEC31A   | chr4  | 0.079947432 | + T2D risk | Body    |
| cg14853265    | CHFR     | chr12 | 0.079990359 | - T2D risk | Body    |
| cg16470539    | NF1      | chr17 | 0.080045485 | - T2D risk | Body    |
| cg21269770    | PRKCE    | chr2  | 0.080202945 | - T2D risk | Body    |
| cg08017248    | GALK2    | chr15 | 0.080254957 | + T2D risk | TSS1500 |
| cg05948872    | PFKFB2   | chr1  | 0.080257352 | + T2D risk | 3'UTR   |
| cg21687563    | TTC28    | chr22 | 0.080307604 | - T2D risk | Body    |
| cg20820758    | RBM4     | chr11 | 0.08031322  | - T2D risk | TSS1500 |
| cg19215386    | TSHZ1    | chr18 | 0.08032222  | - T2D risk | TSS1500 |
| cg03437106    | ENAH     | chr1  | 0.080399922 | - T2D risk | Body    |
| ch.11.150762R | NUP98    | chr11 | 0.08068562  | - T2D risk | Body    |
| cg12641456    | FAM160A1 | chr4  | 0.080688358 | - T2D risk | 5'UTR   |
| cg00968444    | ITPKB    | chr1  | 0.08070163  | - T2D risk | Body    |
| cg25124489    | PRKCE    | chr2  | 0.080702986 | - T2D risk | Body    |
| cg19462712    | KIAA0355 | chr19 | 0.080713686 | + T2D risk | TSS1500 |
| cg17167343    | HMBX1    | chr8  | 0.080738688 | - T2D risk | ExonBnd |
| cg17167343    | HMBX1    | chr8  | 0.080738688 | - T2D risk | Body    |
| cg14719533    | LMX1B    | chr9  | 0.080761108 | + T2D risk | Body    |
| cg16751732    | ST6GAL1  | chr3  | 0.080896652 | + T2D risk | TSS200  |
| cg09063254    | ANK2     | chr4  | 0.080913694 | - T2D risk | 5'UTR   |
| cg20981107    | PTPRU    | chr1  | 0.080954269 | + T2D risk | Body    |
| cg20699548    | NCOA2    | chr8  | 0.080987501 | + T2D risk | Body    |
| cg09607915    | FBXO11   | chr2  | 0.080991429 | + T2D risk | 5'UTR   |
| cg08134221    | PRKD1    | chr14 | 0.081032876 | + T2D risk | Body    |
| cg08134221    | PRKD1    | chr14 | 0.081032876 | + T2D risk | ExonBnd |
| cg05517612    | ATXN1    | chr6  | 0.08107465  | + T2D risk | 5'UTR   |
| cg13504585    | ITPKB    | chr1  | 0.081108541 | + T2D risk | Body    |
| cg04150737    | PRMT3    | chr11 | 0.081109648 | - T2D risk | 5'UTR   |
| cg04150737    | PRMT3    | chr11 | 0.081109648 | - T2D risk | 1stExon |
| cg24867601    | SRPK2    | chr7  | 0.081194377 | - T2D risk | Body    |
| cg11674432    | RET      | chr10 | 0.08125819  | + T2D risk | TSS200  |
| cg18404346    | PACS2    | chr14 | 0.081460228 | + T2D risk | 5'UTR   |
| cg22063108    | GNA12    | chr7  | 0.08146182  | + T2D risk | Body    |
| cg24946206    | CDK8     | chr13 | 0.081594734 | + T2D risk | Body    |
| cg26941996    | PDK1     | chr2  | 0.081695483 | - T2D risk | Body    |
| cg10281478    | DYNC111  | chr7  | 0.081708238 | + T2D risk | 5'UTR   |
| cg15014008    | ANK3     | chr10 | 0.081847373 | - T2D risk | Body    |
| cg20876266    | LMCD1    | chr3  | 0.081996363 | - T2D risk | 5'UTR   |
| cg20876266    | LMCD1    | chr3  | 0.081996363 | - T2D risk | Body    |
| cg02627993    | PACS2    | chr14 | 0.082162193 | - T2D risk | Body    |
| cg20694160    | TBC1D5   | chr3  | 0.082174935 | + T2D risk | 5'UTR   |
| cg18175470    | ANK3     | chr10 | 0.082261832 | - T2D risk | TSS1500 |
| cg09099082    | CPLX2    | chr5  | 0.082340629 | + T2D risk | 5'UTR   |
| cg15379182    | LYVE1    | chr11 | 0.082365263 | + T2D risk | TSS1500 |
| cg19417382    | TSHZ1    | chr18 | 0.082491601 | - T2D risk | 5'UTR   |
| cg19417382    | TSHZ1    | chr18 | 0.082491601 | - T2D risk | Body    |
| cg00150307    | PRKCE    | chr2  | 0.082493675 | + T2D risk | Body    |
| cg18771566    | ADCY5    | chr3  | 0.082598615 | + T2D risk | Body    |
| cg03039399    | CREBBP   | chr16 | 0.082601016 | - T2D risk | TSS1500 |
| cg17536287    | LCA5     | chr6  | 0.082604555 | - T2D risk | Body    |
| cg11672338    | DIP2C    | chr10 | 0.082616375 | + T2D risk | Body    |
| cg19140503    | DIP2C    | chr10 | 0.082656874 | - T2D risk | Body    |
| cg01576496    | PPP1R12A | chr12 | 0.082661203 | + T2D risk | Body    |
| cg01576496    | PPP1R12A | chr12 | 0.082661203 | + T2D risk | 5'UTR   |
| cg07571734    | PRKAG2   | chr7  | 0.082708049 | - T2D risk | Body    |
| cg25309998    | ARHGAP32 | chr11 | 0.082822072 | - T2D risk | Body    |
| cg10410319    | ATP8A2   | chr13 | 0.0828452   | + T2D risk | Body    |
| cg02430645    | CRYL1    | chr13 | 0.08299602  | + T2D risk | Body    |
| cg01652814    | CHID1    | chr11 | 0.083116692 | + T2D risk | Body    |
| cg23181591    | ZHX2     | chr8  | 0.083123887 | - T2D risk | TSS200  |
| cg24861502    | TTC28    | chr22 | 0.08315972  | - T2D risk | Body    |
| cg20054872    | KIAA1217 | chr10 | 0.083180252 | - T2D risk | Body    |
| cg19715414    | ATP4A    | chr19 | 0.083191135 | - T2D risk | Body    |
| cg16106678    | COX6A1   | chr12 | 0.083194    | + T2D risk | Body    |
| cg17793819    | ZHX2     | chr8  | 0.083275721 | - T2D risk | TSS200  |
| cg27250470    | SLIT3    | chr5  | 0.083290371 | - T2D risk | Body    |
| cg16013247    | USP29    | chr19 | 0.083335518 | + T2D risk | TSS1500 |
| cg13054773    | TTC28    | chr22 | 0.083370818 | - T2D risk | 3'UTR   |
| cg01025883    | PRKCB    | chr16 | 0.083391537 | + T2D risk | Body    |
| cg04694761    | CALD1    | chr7  | 0.083402272 | - T2D risk | Body    |



|            |                 |       |             |            |         |
|------------|-----------------|-------|-------------|------------|---------|
| cg18314814 | <i>TMEM131</i>  | chr2  | 0.083443901 | - T2D risk | Body    |
| cg22520850 | <i>CUX2</i>     | chr12 | 0.083457819 | + T2D risk | Body    |
| cg20383390 | <i>MAN1A2</i>   | chr1  | 0.083474724 | + T2D risk | TSS1500 |
| cg00148035 | <i>CUX2</i>     | chr12 | 0.083478401 | + T2D risk | Body    |
| cg06614534 | <i>CREBBP</i>   | chr16 | 0.083505955 | + T2D risk | Body    |
| cg22583260 | <i>TBC1D5</i>   | chr3  | 0.083527837 | - T2D risk | Body    |
| cg01735503 | <i>WWP2</i>     | chr16 | 0.083594503 | + T2D risk | Body    |
| cg22823546 | <i>MDM1</i>     | chr12 | 0.083614435 | - T2D risk | TSS200  |
| cg01638592 | <i>CUX2</i>     | chr12 | 0.083637421 | - T2D risk | Body    |
| cg14416206 | <i>CPLX2</i>    | chr5  | 0.08371142  | + T2D risk | 5'UTR   |
| cg02263539 | <i>ST6GAL1</i>  | chr3  | 0.083714    | + T2D risk | 5'UTR   |
| cg00588858 | <i>MGRN1</i>    | chr16 | 0.083848899 | - T2D risk | 1stExon |
| cg12589798 | <i>CDH22</i>    | chr20 | 0.083856417 | + T2D risk | Body    |
| cg19978728 | <i>CADM1</i>    | chr11 | 0.083911846 | - T2D risk | Body    |
| cg13369138 | <i>BCAT1</i>    | chr12 | 0.083917741 | - T2D risk | Body    |
| cg07433663 | <i>MEIS2</i>    | chr15 | 0.083936661 | - T2D risk | 5'UTR   |
| cg07433663 | <i>MEIS2</i>    | chr15 | 0.083936661 | - T2D risk | 1stExon |
| cg07433663 | <i>MEIS2</i>    | chr15 | 0.083936661 | - T2D risk | Body    |
| cg07383652 | <i>USP53</i>    | chr4  | 0.084092184 | + T2D risk | Body    |
| cg07003745 | <i>APC</i>      | chr5  | 0.084121329 | + T2D risk | TSS200  |
| cg05906024 | <i>SLIT3</i>    | chr5  | 0.084230696 | - T2D risk | Body    |
| cg09395855 | <i>GRK5</i>     | chr10 | 0.084283267 | - T2D risk | 1stExon |
| cg09395855 | <i>GRK5</i>     | chr10 | 0.084283267 | - T2D risk | 5'UTR   |
| cg13680764 | <i>PDLIM5</i>   | chr4  | 0.08429689  | - T2D risk | 5'UTR   |
| cg13680764 | <i>PDLIM5</i>   | chr4  | 0.08429689  | - T2D risk | Body    |
| cg20288630 | <i>PDE5A</i>    | chr4  | 0.08434848  | - T2D risk | TSS1500 |
| cg00826997 | <i>CNTNAP2</i>  | chr7  | 0.084479186 | - T2D risk | Body    |
| cg03416839 | <i>TSGA10</i>   | chr2  | 0.084540384 | - T2D risk | 5'UTR   |
| cg13235654 | <i>NDUFB3</i>   | chr2  | 0.084561025 | + T2D risk | TSS200  |
| cg14567877 | <i>ADCY5</i>    | chr3  | 0.084629072 | - T2D risk | Body    |
| cg16226396 | <i>DYNC111</i>  | chr7  | 0.084666831 | + T2D risk | 5'UTR   |
| cg24247923 | <i>MET</i>      | chr7  | 0.084754889 | - T2D risk | Body    |
| cg12223863 | <i>DIP2C</i>    | chr10 | 0.084966516 | + T2D risk | Body    |
| cg14821713 | <i>RTN4</i>     | chr2  | 0.084979694 | + T2D risk | Body    |
| cg15991288 | <i>WDR47</i>    | chr1  | 0.085052813 | - T2D risk | 5'UTR   |
| cg08886760 | <i>ZHX2</i>     | chr8  | 0.085080892 | + T2D risk | TSS200  |
| cg16442712 | <i>KIAA1217</i> | chr10 | 0.085112858 | - T2D risk | Body    |
| cg02868535 | <i>RHBDD1</i>   | chr2  | 0.085262685 | - T2D risk | Body    |
| cg21021145 | <i>SRPK2</i>    | chr7  | 0.085276272 | - T2D risk | 3'UTR   |
| cg00914222 | <i>PTPRU</i>    | chr1  | 0.085424412 | - T2D risk | Body    |
| cg18366149 | <i>TANC2</i>    | chr17 | 0.085568255 | + T2D risk | Body    |
| cg05842220 | <i>MGRN1</i>    | chr16 | 0.085578741 | + T2D risk | Body    |
| cg01512405 | <i>RAP1GAP2</i> | chr17 | 0.085593589 | + T2D risk | Body    |
| cg16523267 | <i>ANK2</i>     | chr4  | 0.085603702 | + T2D risk | Body    |
| cg19990476 | <i>DIP2C</i>    | chr10 | 0.085707846 | + T2D risk | Body    |
| cg21926603 | <i>ZHX2</i>     | chr8  | 0.0857317   | + T2D risk | 5'UTR   |
| cg18815674 | <i>SEZ6L</i>    | chr22 | 0.085771797 | + T2D risk | Body    |
| cg12213687 | <i>COL4A1</i>   | chr13 | 0.085805802 | + T2D risk | Body    |
| cg00350652 | <i>WDR47</i>    | chr1  | 0.085827045 | - T2D risk | 5'UTR   |
| cg00350652 | <i>WDR47</i>    | chr1  | 0.085827045 | - T2D risk | 1stExon |
| cg12114033 | <i>MTHFS</i>    | chr15 | 0.085919776 | + T2D risk | Body    |
| cg14958756 | <i>SLIT3</i>    | chr5  | 0.085943794 | + T2D risk | Body    |
| cg20721322 | <i>CNTNAP2</i>  | chr7  | 0.085971432 | + T2D risk | Body    |
| cg14697542 | <i>PLEKHG3</i>  | chr14 | 0.08597466  | - T2D risk | Body    |
| cg13197260 | <i>KIAA1109</i> | chr4  | 0.08614715  | - T2D risk | Body    |
| cg15841929 | <i>KREMEN1</i>  | chr22 | 0.086151491 | - T2D risk | TSS1500 |
| cg26492514 | <i>SLIT3</i>    | chr5  | 0.08622602  | - T2D risk | TSS200  |
| cg18518183 | <i>DYNC112</i>  | chr2  | 0.086260983 | - T2D risk | 5'UTR   |
| cg20860792 | <i>NF1</i>      | chr17 | 0.086426599 | - T2D risk | Body    |
| cg16957546 | <i>ARHGEF9</i>  | chrX  | 0.086444798 | - T2D risk | Body    |
| cg10000052 | <i>KDM4B</i>    | chr19 | 0.086505685 | + T2D risk | Body    |
| cg10908116 | <i>COL4A1</i>   | chr13 | 0.086541229 | - T2D risk | Body    |
| cg26309538 | <i>ATXN1</i>    | chr6  | 0.086714083 | + T2D risk | 5'UTR   |
| cg14415107 | <i>ARL8B</i>    | chr3  | 0.08679648  | - T2D risk | Body    |
| cg19145774 | <i>EFCAB14</i>  | chr1  | 0.086803951 | - T2D risk | TSS200  |
| cg11103458 | <i>CUX1</i>     | chr7  | 0.086827947 | + T2D risk | Body    |
| cg17098934 | <i>KIAA1217</i> | chr10 | 0.087021057 | - T2D risk | 1stExon |
| cg17098934 | <i>KIAA1217</i> | chr10 | 0.087021057 | - T2D risk | 5'UTR   |
| cg12216730 | <i>ARHGAP32</i> | chr11 | 0.087023291 | - T2D risk | Body    |
| cg14970299 | <i>SNX4</i>     | chr3  | 0.087025813 | - T2D risk | Body    |



|            |          |       |             |            |         |
|------------|----------|-------|-------------|------------|---------|
| cg03238819 | POLA1    | chrX  | 0.087064294 | - T2D risk | Body    |
| cg16113692 | SVIP     | chr11 | 0.087122823 | + T2D risk | TSS200  |
| cg11815250 | ITPKB    | chr1  | 0.087234696 | - T2D risk | Body    |
| cg11360973 | DIP2C    | chr10 | 0.087312919 | - T2D risk | Body    |
| cg14631997 | APBA1    | chr9  | 0.087342243 | - T2D risk | Body    |
| cg18095824 | FNIP2    | chr4  | 0.087358853 | + T2D risk | Body    |
| cg22689999 | ZHX2     | chr8  | 0.08739544  | + T2D risk | 5'UTR   |
| cg18450283 | TSC22D1  | chr13 | 0.087425937 | - T2D risk | TSS1500 |
| cg23042076 | RET      | chr10 | 0.087467692 | + T2D risk | TSS1500 |
| cg11319586 | ANK3     | chr10 | 0.087527392 | - T2D risk | Body    |
| cg04117301 | KIAA1217 | chr10 | 0.087628039 | - T2D risk | Body    |
| cg08784934 | DIP2C    | chr10 | 0.087667116 | - T2D risk | Body    |
| cg02696607 | PRKAG2   | chr7  | 0.087682947 | + T2D risk | 5'UTR   |
| cg02696607 | PRKAG2   | chr7  | 0.087682947 | + T2D risk | Body    |
| cg26446348 | ATP6V1A  | chr3  | 0.087711825 | - T2D risk | TSS1500 |
| cg23653587 | EFR3A    | chr8  | 0.087744487 | - T2D risk | Body    |
| cg15337037 | NCOA7    | chr6  | 0.08776028  | + T2D risk | 5'UTR   |
| cg05953394 | PRKAG2   | chr7  | 0.087864401 | - T2D risk | 5'UTR   |
| cg05953394 | PRKAG2   | chr7  | 0.087864401 | - T2D risk | 1stExon |
| cg09209398 | CALD1    | chr7  | 0.087887265 | - T2D risk | Body    |
| cg02148222 | ST6GAL1  | chr3  | 0.087889565 | - T2D risk | 5'UTR   |
| cg15287092 | SEMA3G   | chr3  | 0.087994057 | - T2D risk | TSS200  |
| cg25011019 | ROBO2    | chr3  | 0.088084019 | - T2D risk | TSS1500 |
| cg00218631 | NUCB2    | chr11 | 0.088149048 | - T2D risk | TSS1500 |
| cg11834221 | ENAH     | chr1  | 0.088239125 | - T2D risk | Body    |
| cg12887131 | NGF      | chr1  | 0.088273781 | + T2D risk | 5'UTR   |
| cg15348714 | KDM4B    | chr19 | 0.08838771  | + T2D risk | Body    |
| cg09579303 | CEP126   | chr11 | 0.088441251 | + T2D risk | Body    |
| cg16939412 | EVI5     | chr1  | 0.08848421  | + T2D risk | Body    |
| cg25020678 | DIP2C    | chr10 | 0.088504305 | + T2D risk | Body    |
| cg21282015 | PRKCB    | chr16 | 0.088516787 | - T2D risk | Body    |
| cg02322135 | ANK2     | chr4  | 0.088527708 | + T2D risk | TSS1500 |
| cg02322135 | ANK2     | chr4  | 0.088527708 | + T2D risk | Body    |
| cg14878943 | DNAH9    | chr17 | 0.088624213 | + T2D risk | TSS1500 |
| cg14878943 | DNAH9    | chr17 | 0.088624213 | + T2D risk | Body    |
| cg12182708 | MMS19    | chr10 | 0.088653999 | - T2D risk | Body    |
| cg05961406 | FLT1     | chr13 | 0.088704672 | - T2D risk | Body    |
| cg05960592 | ACTN4    | chr19 | 0.088772135 | - T2D risk | Body    |
| cg22674082 | TMEM131  | chr2  | 0.08878443  | - T2D risk | Body    |
| cg00290373 | CCNB1    | chr5  | 0.088811691 | - T2D risk | TSS1500 |
| cg05334416 | MEIS2    | chr15 | 0.088859875 | - T2D risk | Body    |
| cg26760731 | NPEPPS   | chr17 | 0.088962581 | + T2D risk | Body    |
| cg24687287 | ACTN4    | chr19 | 0.088982077 | + T2D risk | Body    |
| cg17034775 | JPH2     | chr20 | 0.089259665 | - T2D risk | Body    |
| cg12592716 | CUL1     | chr7  | 0.089392296 | - T2D risk | TSS1500 |
| cg11551879 | CUX2     | chr12 | 0.089454778 | + T2D risk | Body    |
| cg15717277 | SLIT3    | chr5  | 0.089503401 | - T2D risk | Body    |
| cg11109845 | CUL1     | chr7  | 0.089557052 | - T2D risk | TSS1500 |
| cg25506204 | ASH1L    | chr1  | 0.089591188 | + T2D risk | 5'UTR   |
| cg09551249 | RAP1GAP2 | chr17 | 0.089594945 | + T2D risk | Body    |
| cg06273077 | LAP3     | chr4  | 0.089603195 | - T2D risk | Body    |
| cg16167782 | TSHZ1    | chr18 | 0.089613995 | + T2D risk | 5'UTR   |
| cg24682385 | CREBBP   | chr16 | 0.089637821 | - T2D risk | Body    |
| cg09592133 | ANK2     | chr4  | 0.089697533 | - T2D risk | Body    |
| cg24979630 | PPP1R12A | chr12 | 0.089709638 | - T2D risk | TSS200  |
| cg24979630 | PPP1R12A | chr12 | 0.089709638 | - T2D risk | TSS1500 |
| cg16329050 | PHF21A   | chr11 | 0.089849369 | - T2D risk | Body    |
| cg23168390 | ATP6V1A  | chr3  | 0.089864888 | - T2D risk | TSS1500 |
| cg02755111 | LMCD1    | chr3  | 0.089936884 | - T2D risk | TSS200  |
| cg04896165 | BCAT1    | chr12 | 0.090040797 | - T2D risk | 3'UTR   |
| cg20475884 | CUX1     | chr7  | 0.090045513 | + T2D risk | Body    |
| cg11062167 | RHOQ     | chr2  | 0.090052932 | - T2D risk | Body    |
| cg27325293 | PTPRU    | chr1  | 0.090406927 | - T2D risk | Body    |
| cg14648069 | MDM1     | chr12 | 0.090563854 | - T2D risk | TSS200  |
| cg11123018 | SCGN     | chr6  | 0.090640408 | - T2D risk | TSS1500 |
| cg02656354 | KCNIP3   | chr2  | 0.090668663 | + T2D risk | Body    |
| cg12419525 | KANTR    | chrX  | 0.090692051 | + T2D risk | Body    |
| cg14931884 | DIP2C    | chr10 | 0.09076248  | - T2D risk | Body    |
| cg02628470 | SGSM2    | chr17 | 0.090774972 | - T2D risk | Body    |
| cg01637244 | OXSM     | chr3  | 0.09078043  | + T2D risk | Body    |



|            |          |       |             |            |         |
|------------|----------|-------|-------------|------------|---------|
| cg08224852 | ATXN1    | chr6  | 0.090832718 | - T2D risk | Body    |
| cg08116711 | CUX1     | chr7  | 0.090854852 | + T2D risk | Body    |
| cg21787390 | PTPRU    | chr1  | 0.090877583 | - T2D risk | Body    |
| cg06906156 | CLEC16A  | chr16 | 0.091047985 | + T2D risk | Body    |
| cg15673843 | KDM4B    | chr19 | 0.09106224  | + T2D risk | 5'UTR   |
| cg07226883 | PPP1R12A | chr12 | 0.09108588  | + T2D risk | Body    |
| cg21748697 | ST8SIA1  | chr12 | 0.091119933 | - T2D risk | Body    |
| cg06888756 | UXS1     | chr2  | 0.091149463 | + T2D risk | Body    |
| cg06888756 | UXS1     | chr2  | 0.091149463 | + T2D risk | TSS200  |
| cg06677151 | DIP2C    | chr10 | 0.091175692 | + T2D risk | Body    |
| cg13952914 | AGPAT3   | chr21 | 0.091177953 | + T2D risk | Body    |
| cg15831911 | PACRG    | chr6  | 0.091213427 | + T2D risk | Body    |
| cg24133278 | WDR48    | chr3  | 0.091218694 | + T2D risk | TSS200  |
| cg02146462 | RAP1GAP2 | chr17 | 0.09122132  | - T2D risk | Body    |
| cg19567415 | TANC2    | chr17 | 0.091241425 | - T2D risk | Body    |
| cg20885511 | FAM160A1 | chr4  | 0.091318176 | - T2D risk | Body    |
| cg27355431 | TMEM131  | chr2  | 0.091320656 | + T2D risk | Body    |
| cg14729344 | GRK5     | chr10 | 0.091405886 | - T2D risk | Body    |
| cg23840797 | PLAGL1   | chr6  | 0.091424531 | + T2D risk | TSS1500 |
| cg23840797 | PLAGL1   | chr6  | 0.091424531 | + T2D risk | 5'UTR   |
| cg26732500 | DIP2C    | chr10 | 0.091504956 | + T2D risk | Body    |
| cg16431278 | TMEM131  | chr2  | 0.091510876 | + T2D risk | Body    |
| cg24292404 | TMEM131  | chr2  | 0.091522733 | + T2D risk | Body    |
| cg18917803 | CADM1    | chr11 | 0.091535686 | + T2D risk | Body    |
| cg16883353 | ATP8A1   | chr4  | 0.091777075 | + T2D risk | Body    |
| cg19145162 | TANC2    | chr17 | 0.091795433 | + T2D risk | Body    |
| cg08896015 | TSHZ1    | chr18 | 0.091853949 | - T2D risk | 5'UTR   |
| cg08896015 | TSHZ1    | chr18 | 0.091853949 | - T2D risk | Body    |
| cg10651775 | CDH22    | chr20 | 0.091868387 | + T2D risk | Body    |
| cg08192373 | GRK5     | chr10 | 0.091870923 | - T2D risk | Body    |
| cg11159701 | CUX1     | chr7  | 0.091890968 | - T2D risk | Body    |
| cg13569053 | PTPRU    | chr1  | 0.092075335 | - T2D risk | Body    |
| cg08414807 | FAM155B  | chrX  | 0.092204458 | - T2D risk | Body    |
| cg20056213 | SLIT3    | chr5  | 0.092227799 | - T2D risk | Body    |
| cg11200649 | RBM4     | chr11 | 0.092233922 | - T2D risk | Body    |
| cg03130149 | NUP98    | chr11 | 0.092531374 | + T2D risk | TSS200  |
| cg18281014 | AGPAT3   | chr21 | 0.092622398 | + T2D risk | 5'UTR   |
| cg03165700 | NPAT     | chr11 | 0.092760802 | - T2D risk | Body    |
| cg14197032 | FNIP2    | chr4  | 0.092905023 | + T2D risk | 3'UTR   |
| cg20053681 | CADM1    | chr11 | 0.092952968 | - T2D risk | Body    |
| cg05435739 | PRKCE    | chr2  | 0.093040599 | - T2D risk | Body    |
| cg27589676 | PICALM   | chr11 | 0.093058676 | - T2D risk | TSS200  |
| cg27589676 | PICALM   | chr11 | 0.093058676 | - T2D risk | TSS1500 |
| cg00109643 | PICALM   | chr11 | 0.093144613 | + T2D risk | TSS200  |
| cg00109643 | PICALM   | chr11 | 0.093144613 | + T2D risk | 5'UTR   |
| cg11134095 | ATXN1    | chr6  | 0.093293349 | + T2D risk | 5'UTR   |
| cg00506589 | ATRNL1   | chr10 | 0.093332662 | - T2D risk | 1stExon |
| cg00506589 | ATRNL1   | chr10 | 0.093332662 | - T2D risk | Body    |
| cg00506589 | ATRNL1   | chr10 | 0.093332662 | - T2D risk | 5'UTR   |
| cg12714060 | KDM4B    | chr19 | 0.093418698 | - T2D risk | 5'UTR   |
| cg05459609 | MGRN1    | chr16 | 0.093498578 | + T2D risk | Body    |
| cg18617276 | KREMEN1  | chr22 | 0.093505885 | + T2D risk | Body    |
| cg13562751 | PHACTR1  | chr6  | 0.093709973 | + T2D risk | Body    |
| cg19898923 | FAM160A1 | chr4  | 0.093731878 | - T2D risk | Body    |
| cg01209168 | ARL8B    | chr3  | 0.093860294 | + T2D risk | Body    |
| cg14522884 | GGPS1    | chr1  | 0.09386365  | - T2D risk | TSS1500 |
| cg05558454 | DIP2C    | chr10 | 0.093895016 | - T2D risk | Body    |
| cg19203174 | DYNC111  | chr7  | 0.093953465 | - T2D risk | Body    |
| cg23464070 | SRPK2    | chr7  | 0.094000156 | - T2D risk | Body    |
| cg23464070 | SRPK2    | chr7  | 0.094000156 | - T2D risk | 5'UTR   |
| cg23464070 | SRPK2    | chr7  | 0.094000156 | - T2D risk | 1stExon |
| cg00594011 | DKK2     | chr4  | 0.094008007 | + T2D risk | 1stExon |
| cg08067561 | DNAH9    | chr17 | 0.094242874 | + T2D risk | Body    |
| cg02606218 | GALK2    | chr15 | 0.094289907 | + T2D risk | 5'UTR   |
| cg02606218 | GALK2    | chr15 | 0.094289907 | + T2D risk | 1stExon |
| cg19334977 | DIP2C    | chr10 | 0.094332978 | - T2D risk | Body    |
| cg17141125 | RHOA     | chr3  | 0.094340502 | - T2D risk | ExonBnd |
| cg17141125 | RHOA     | chr3  | 0.094340502 | - T2D risk | Body    |
| cg14241731 | FLT1     | chr13 | 0.094368216 | - T2D risk | Body    |
| cg14241731 | FLT1     | chr13 | 0.094368216 | - T2D risk | 3'UTR   |



|            |          |       |             |            |         |
|------------|----------|-------|-------------|------------|---------|
| cg13529101 | CUX1     | chr7  | 0.094418474 | - T2D risk | Body    |
| cg01380361 | PFKFB2   | chr1  | 0.094445079 | + T2D risk | TSS1500 |
| cg27236859 | ASH1L    | chr1  | 0.094449123 | + T2D risk | Body    |
| cg19779712 | ATP6V1H  | chr8  | 0.094456745 | - T2D risk | Body    |
| cg18762243 | ITPKB    | chr1  | 0.094463337 | + T2D risk | 5'UTR   |
| cg01755850 | SLIT3    | chr5  | 0.094598784 | - T2D risk | Body    |
| cg20217971 | ITGB1    | chr10 | 0.094619266 | + T2D risk | 5'UTR   |
| cg07888803 | TMEM131  | chr2  | 0.094714446 | + T2D risk | Body    |
| cg12505433 | TBC1D5   | chr3  | 0.094780059 | - T2D risk | Body    |
| cg01009386 | RNF217   | chr6  | 0.094849988 | + T2D risk | Body    |
| cg27604944 | DACH1    | chr13 | 0.094871295 | - T2D risk | 1stExon |
| cg08275306 | RET      | chr10 | 0.094943139 | - T2D risk | TSS200  |
| cg09986153 | HMBBOX1  | chr8  | 0.094971708 | + T2D risk | Body    |
| cg22920997 | SPOCK1   | chr5  | 0.095015924 | - T2D risk | Body    |
| cg13611347 | NOL4     | chr18 | 0.095025174 | - T2D risk | Body    |
| cg01688293 | CHFR     | chr12 | 0.095041498 | + T2D risk | Body    |
| cg08384163 | DNAJC13  | chr3  | 0.0950415   | - T2D risk | Body    |
| cg05416676 | PRKCB    | chr16 | 0.095041585 | + T2D risk | Body    |
| cg04545942 | DACH1    | chr13 | 0.095122597 | + T2D risk | Body    |
| cg25668052 | GLG1     | chr16 | 0.095128474 | + T2D risk | Body    |
| cg16910830 | CNTNAP2  | chr7  | 0.095175377 | + T2D risk | TSS200  |
| cg26303213 | ATXN1    | chr6  | 0.095376008 | - T2D risk | 5'UTR   |
| cg17868330 | CNTNAP2  | chr7  | 0.095389738 | + T2D risk | Body    |
| cg13675662 | PACS1    | chr11 | 0.095423016 | + T2D risk | Body    |
| cg06930433 | GLG1     | chr16 | 0.095450039 | + T2D risk | Body    |
| cg23370213 | SLC7A2   | chr8  | 0.095608711 | + T2D risk | 5'UTR   |
| cg00967809 | NGF      | chr1  | 0.095765941 | + T2D risk | 5'UTR   |
| cg23264914 | CHID1    | chr11 | 0.095769343 | + T2D risk | Body    |
| cg19265396 | DYNC111  | chr7  | 0.095837762 | + T2D risk | Body    |
| cg18976140 | RHOA     | chr3  | 0.095875735 | + T2D risk | TSS1500 |
| cg03044067 | EVI5     | chr1  | 0.095880643 | - T2D risk | Body    |
| cg05534191 | RAP1GAP2 | chr17 | 0.095894199 | - T2D risk | Body    |
| cg10778837 | CNTNAP2  | chr7  | 0.095980496 | + T2D risk | Body    |
| cg20973442 | SEZ6L    | chr22 | 0.096115934 | + T2D risk | Body    |
| cg17579214 | RAP2A    | chr13 | 0.096457238 | - T2D risk | TSS1500 |
| cg09548519 | CRYL1    | chr13 | 0.096536108 | + T2D risk | Body    |
| cg13898290 | GRK5     | chr10 | 0.096661239 | + T2D risk | Body    |
| cg14947116 | CUL1     | chr7  | 0.096772633 | - T2D risk | 5'UTR   |
| cg09509035 | GGPS1    | chr1  | 0.096783984 | - T2D risk | TSS1500 |
| cg26314924 | DIP2C    | chr10 | 0.096793883 | + T2D risk | Body    |
| cg07242169 | TMEM219  | chr16 | 0.096831264 | + T2D risk | Body    |
| cg07242169 | TMEM219  | chr16 | 0.096831264 | + T2D risk | ExonBnd |
| cg02690148 | TBC1D5   | chr3  | 0.096886631 | + T2D risk | Body    |
| cg14970340 | PPFIBP1  | chr12 | 0.097193317 | - T2D risk | TSS200  |
| cg18235239 | SLIT3    | chr5  | 0.0971956   | + T2D risk | Body    |
| cg23382224 | PRKCB    | chr16 | 0.097274167 | - T2D risk | Body    |
| cg24713490 | TBC1D5   | chr3  | 0.097340641 | - T2D risk | 5'UTR   |
| cg24713490 | TBC1D5   | chr3  | 0.097340641 | - T2D risk | TSS1500 |
| cg12267702 | AGPAT3   | chr21 | 0.09739062  | + T2D risk | Body    |
| cg22352234 | PLAGL1   | chr6  | 0.097425094 | + T2D risk | 5'UTR   |
| cg22352234 | PLAGL1   | chr6  | 0.097425094 | + T2D risk | 1stExon |
| cg01721051 | KIAA1217 | chr10 | 0.097456414 | - T2D risk | Body    |
| cg11671075 | DIP2C    | chr10 | 0.097584016 | - T2D risk | Body    |
| cg13530999 | LMX1B    | chr9  | 0.097636328 | + T2D risk | Body    |
| cg26249524 | TTC28    | chr22 | 0.097647763 | - T2D risk | Body    |
| cg09851241 | ST6GAL1  | chr3  | 0.097680204 | + T2D risk | 5'UTR   |
| cg04756727 | TTC28    | chr22 | 0.097709346 | - T2D risk | Body    |
| cg11242972 | TANC2    | chr17 | 0.097752448 | + T2D risk | Body    |
| cg16692934 | ZRANB1   | chr10 | 0.097753359 | - T2D risk | Body    |
| cg23591217 | DNAH9    | chr17 | 0.097968496 | - T2D risk | Body    |
| cg14944514 | CADM1    | chr11 | 0.097974488 | - T2D risk | 5'UTR   |
| cg14944514 | CADM1    | chr11 | 0.097974488 | - T2D risk | 1stExon |
| cg11466301 | WWP2     | chr16 | 0.098009156 | - T2D risk | TSS200  |
| cg11466301 | WWP2     | chr16 | 0.098009156 | - T2D risk | Body    |
| cg26072075 | NCOA7    | chr6  | 0.098017762 | - T2D risk | 5'UTR   |
| cg26072075 | NCOA7    | chr6  | 0.098017762 | - T2D risk | Body    |
| cg00164458 | ENAH     | chr1  | 0.098162772 | + T2D risk | 3'UTR   |
| cg05567468 | MET      | chr7  | 0.098169961 | + T2D risk | 5'UTR   |
| cg21941618 | NUP98    | chr11 | 0.098199647 | - T2D risk | Body    |
| cg23521253 | ZRANB1   | chr10 | 0.098258551 | + T2D risk | Body    |



|               |          |       |             |            |         |
|---------------|----------|-------|-------------|------------|---------|
| cg18042593    | NPAT     | chr11 | 0.098336175 | - T2D risk | Body    |
| cg24723457    | DIP2C    | chr10 | 0.098393025 | + T2D risk | Body    |
| cg08973369    | ASB9     | chrX  | 0.098486758 | + T2D risk | TSS1500 |
| cg08973369    | ASB9     | chrX  | 0.098486758 | + T2D risk | 5'UTR   |
| cg08973369    | ASB9     | chrX  | 0.098486758 | + T2D risk | 1stExon |
| cg00736299    | MGRN1    | chr16 | 0.098530901 | - T2D risk | Body    |
| cg02962630    | DLL4     | chr15 | 0.098539161 | + T2D risk | Body    |
| cg25440961    | SH3GL2   | chr9  | 0.098571946 | - T2D risk | TSS200  |
| cg25676074    | NCOA2    | chr8  | 0.098600652 | - T2D risk | Body    |
| cg16398541    | SLIT3    | chr5  | 0.09863389  | - T2D risk | Body    |
| cg14169803    | LAMA4    | chr6  | 0.098671243 | - T2D risk | Body    |
| cg21537212    | TTC28    | chr22 | 0.098683039 | + T2D risk | Body    |
| cg23729501    | PRKACB   | chr1  | 0.098728362 | - T2D risk | 5'UTR   |
| cg23729501    | PRKACB   | chr1  | 0.098728362 | - T2D risk | 1stExon |
| cg23729501    | PRKACB   | chr1  | 0.098728362 | - T2D risk | Body    |
| cg23729501    | PRKACB   | chr1  | 0.098728362 | - T2D risk | TSS1500 |
| cg09934706    | KDM4B    | chr19 | 0.099041414 | + T2D risk | Body    |
| cg15322661    | NCOA2    | chr8  | 0.09905894  | + T2D risk | Body    |
| cg13081096    | SRPK2    | chr7  | 0.099117078 | - T2D risk | Body    |
| cg20910830    | MGRN1    | chr16 | 0.099204478 | + T2D risk | Body    |
| cg04540836    | ZHX2     | chr8  | 0.099281468 | + T2D risk | 5'UTR   |
| cg21363967    | NCOR1    | chr17 | 0.099283371 | + T2D risk | Body    |
| cg02045259    | RET      | chr10 | 0.099362486 | + T2D risk | TSS200  |
| cg05529091    | CUX2     | chr12 | 0.099405047 | - T2D risk | Body    |
| cg25246084    | KDM4B    | chr19 | 0.099440861 | + T2D risk | 5'UTR   |
| cg17830540    | ULK4     | chr3  | 0.099492069 | - T2D risk | Body    |
| cg05874111    | CUX2     | chr12 | 0.099759892 | + T2D risk | Body    |
| cg02590038    | MMS19    | chr10 | 0.09976982  | - T2D risk | TSS1500 |
| cg16899179    | NCOA2    | chr8  | 0.099775035 | + T2D risk | 5'UTR   |
| cg16650112    | PRKCB    | chr16 | 0.09979784  | - T2D risk | Body    |
| cg20371505    | ASXL2    | chr2  | 0.099806102 | - T2D risk | Body    |
| cg18610157    | PACRG    | chr6  | 0.099854291 | - T2D risk | Body    |
| cg27476859    | GNA12    | chr7  | 0.09987186  | - T2D risk | Body    |
| cg01612449    | RBM4     | chr11 | 0.099885921 | - T2D risk | Body    |
| cg01021653    | FNIP2    | chr4  | 0.099886191 | - T2D risk | Body    |
| cg22513428    | ATXN1    | chr6  | 0.100059863 | - T2D risk | 5'UTR   |
| cg17655851    | APC      | chr5  | 0.100117934 | - T2D risk | Body    |
| cg17655851    | APC      | chr5  | 0.100117934 | - T2D risk | TSS1500 |
| cg08289167    | HMBXO1   | chr8  | 0.100193104 | - T2D risk | Body    |
| cg08186837    | MAN1A2   | chr1  | 0.100194288 | + T2D risk | 1stExon |
| cg08186837    | MAN1A2   | chr1  | 0.100194288 | + T2D risk | 5'UTR   |
| cg09040793    | ADCY5    | chr3  | 0.10020745  | - T2D risk | Body    |
| cg09040793    | ADCY5    | chr3  | 0.10020745  | - T2D risk | 1stExon |
| cg06825627    | SLC7A2   | chr8  | 0.100266253 | - T2D risk | 5'UTR   |
| cg20399616    | BCAT1    | chr12 | 0.100282223 | - T2D risk | Body    |
| cg07119616    | LMX1B    | chr9  | 0.100284447 | + T2D risk | Body    |
| cg06255206    | ATRNL1   | chr10 | 0.100361633 | - T2D risk | Body    |
| cg06704738    | ADCY5    | chr3  | 0.100412624 | + T2D risk | Body    |
| cg17176517    | SNX4     | chr3  | 0.100416438 | + T2D risk | 5'UTR   |
| cg17176517    | SNX4     | chr3  | 0.100416438 | + T2D risk | 1stExon |
| cg18834673    | AGPAT3   | chr21 | 0.100463542 | + T2D risk | 5'UTR   |
| cg01861603    | MGRN1    | chr16 | 0.100528153 | - T2D risk | Body    |
| cg23304647    | GNA12    | chr7  | 0.100621219 | - T2D risk | Body    |
| cg04486528    | CNTNAP2  | chr7  | 0.100679816 | - T2D risk | Body    |
| cg15586931    | RAP1GAP2 | chr17 | 0.100689101 | + T2D risk | Body    |
| cg18639734    | RAP1GAP2 | chr17 | 0.100689518 | - T2D risk | Body    |
| cg24796870    | CLOCK    | chr4  | 0.100717348 | + T2D risk | 5'UTR   |
| cg17977409    | SH3GL2   | chr9  | 0.10077118  | - T2D risk | 5'UTR   |
| cg17977409    | SH3GL2   | chr9  | 0.10077118  | - T2D risk | 1stExon |
| cg01874337    | GNA12    | chr7  | 0.10088366  | - T2D risk | Body    |
| cg17722763    | MGRN1    | chr16 | 0.101092678 | + T2D risk | Body    |
| cg16508202    | CNTNAP2  | chr7  | 0.101095753 | - T2D risk | Body    |
| cg21472700    | DYNC1I2  | chr2  | 0.101109129 | - T2D risk | TSS200  |
| cg05866785    | PRMT3    | chr11 | 0.101147231 | - T2D risk | Body    |
| cg03545859    | PACS1    | chr11 | 0.101166293 | + T2D risk | Body    |
| cg03545859    | PACS1    | chr11 | 0.101166293 | + T2D risk | ExonBnd |
| cg13790125    | CADM1    | chr11 | 0.101191751 | - T2D risk | Body    |
| cg13669156    | TMEM59   | chr1  | 0.101236458 | - T2D risk | TSS1500 |
| cg02925840    | STX6     | chr1  | 0.101301025 | - T2D risk | TSS200  |
| ch.6.2322015F | MAN1A1   | chr6  | 0.101372124 | - T2D risk | Body    |



|               |          |       |             |            |         |
|---------------|----------|-------|-------------|------------|---------|
| cg19109397    | ANK3     | chr10 | 0.101376734 | - T2D risk | Body    |
| cg19691106    | DNAJC1   | chr10 | 0.101467057 | - T2D risk | Body    |
| cg09677763    | NUP98    | chr11 | 0.101487398 | - T2D risk | 5'UTR   |
| cg18342744    | UBL3     | chr13 | 0.101537462 | - T2D risk | TSS200  |
| cg21367769    | SCGN     | chr6  | 0.101543146 | - T2D risk | TSS1500 |
| cg26302009    | PHACTR1  | chr6  | 0.101567597 | + T2D risk | Body    |
| cg12469257    | NGLY1    | chr3  | 0.101604368 | + T2D risk | Body    |
| cg12469257    | NGLY1    | chr3  | 0.101604368 | + T2D risk | 3'UTR   |
| cg14128511    | PPP1R12A | chr12 | 0.101618236 | + T2D risk | TSS200  |
| cg14128511    | PPP1R12A | chr12 | 0.101618236 | + T2D risk | TSS1500 |
| cg02538052    | PCYT1A   | chr3  | 0.101688053 | + T2D risk | TSS200  |
| cg18232548    | DDC      | chr7  | 0.101708249 | - T2D risk | Body    |
| cg20803634    | GRK5     | chr10 | 0.101779141 | + T2D risk | Body    |
| cg08249692    | APC      | chr5  | 0.10180887  | - T2D risk | Body    |
| cg08249692    | APC      | chr5  | 0.10180887  | - T2D risk | TSS1500 |
| cg15961785    | SGSM2    | chr17 | 0.101845115 | + T2D risk | TSS1500 |
| cg18367720    | PPFIBP1  | chr12 | 0.10186525  | - T2D risk | 5'UTR   |
| cg13892721    | SEC31A   | chr4  | 0.101879673 | - T2D risk | TSS1500 |
| ch.12.921239R | ARID2    | chr12 | 0.101898376 | - T2D risk | 3'UTR   |
| cg01397469    | CUX1     | chr7  | 0.101929991 | - T2D risk | TSS1500 |
| cg03910657    | CADM1    | chr11 | 0.101983911 | - T2D risk | Body    |
| cg10137429    | ERC2     | chr3  | 0.102150818 | - T2D risk | 3'UTR   |
| cg26377089    | DNAJC13  | chr3  | 0.102284076 | - T2D risk | Body    |
| cg10041950    | DIP2C    | chr10 | 0.102361006 | - T2D risk | Body    |
| cg15201153    | STX6     | chr1  | 0.102447145 | + T2D risk | 3'UTR   |
| cg15831653    | DNAJC1   | chr10 | 0.102493762 | - T2D risk | TSS1500 |
| cg11802985    | ERC2     | chr3  | 0.102624484 | - T2D risk | 3'UTR   |
| cg20862708    | PLAGL1   | chr6  | 0.102629214 | - T2D risk | 5'UTR   |
| cg16633817    | ROBO2    | chr3  | 0.102638738 | - T2D risk | Body    |
| cg04787525    | DIP2C    | chr10 | 0.102749402 | - T2D risk | Body    |
| cg01885875    | ANK3     | chr10 | 0.102758724 | - T2D risk | Body    |
| cg16436782    | COL4A1   | chr13 | 0.102846065 | - T2D risk | Body    |
| cg04431287    | DIP2C    | chr10 | 0.102940779 | - T2D risk | Body    |
| cg03097389    | TSC22D1  | chr13 | 0.103018756 | + T2D risk | 3'UTR   |
| cg26964636    | KIAA1217 | chr10 | 0.103086593 | - T2D risk | Body    |
| cg05977259    | FBXO11   | chr2  | 0.103099207 | - T2D risk | TSS1500 |
| cg21001907    | INPP4A   | chr2  | 0.103196801 | + T2D risk | 5'UTR   |
| cg07534234    | PACRG    | chr6  | 0.103223493 | - T2D risk | Body    |
| cg26694487    | SPPL2A   | chr15 | 0.103287428 | + T2D risk | TSS200  |
| cg02048354    | PDE5A    | chr4  | 0.103329193 | - T2D risk | 5'UTR   |
| cg02048354    | PDE5A    | chr4  | 0.103329193 | - T2D risk | TSS1500 |
| cg02048354    | PDE5A    | chr4  | 0.103329193 | - T2D risk | Body    |
| cg21211608    | RAP1B    | chr12 | 0.103367221 | + T2D risk | TSS1500 |
| cg00202496    | CLEC16A  | chr16 | 0.103383372 | + T2D risk | TSS1500 |
| cg05855116    | CUX1     | chr7  | 0.103474632 | + T2D risk | Body    |
| cg04826772    | NPAT     | chr11 | 0.103485943 | + T2D risk | Body    |
| cg14321837    | UXS1     | chr2  | 0.103486956 | + T2D risk | TSS1500 |
| cg21962013    | ATP8A2   | chr13 | 0.103534979 | + T2D risk | Body    |
| cg11553654    | TTC28    | chr22 | 0.103542574 | + T2D risk | TSS1500 |
| cg05383524    | MGRN1    | chr16 | 0.103547135 | + T2D risk | Body    |
| cg15502081    | ZHX2     | chr8  | 0.103554545 | + T2D risk | 5'UTR   |
| cg12069553    | RHOA     | chr3  | 0.103569669 | - T2D risk | TSS1500 |
| cg03557226    | NPEPPS   | chr17 | 0.103589966 | - T2D risk | Body    |
| cg01211893    | ITGA1    | chr5  | 0.103615826 | - T2D risk | TSS1500 |
| cg20962960    | DDC      | chr7  | 0.103651896 | - T2D risk | Body    |
| cg05901634    | MGRN1    | chr16 | 0.103732121 | + T2D risk | Body    |
| cg14515032    | RAP1GAP2 | chr17 | 0.10380219  | - T2D risk | Body    |
| cg14405825    | DIP2C    | chr10 | 0.103835503 | + T2D risk | Body    |
| cg05523065    | TMEM150C | chr4  | 0.104089824 | + T2D risk | TSS1500 |
| cg14281340    | PDE5A    | chr4  | 0.104345439 | + T2D risk | Body    |
| cg14281340    | PDE5A    | chr4  | 0.104345439 | + T2D risk | TSS200  |
| cg14281340    | PDE5A    | chr4  | 0.104345439 | + T2D risk | TSS1500 |
| cg00580689    | WDR47    | chr1  | 0.104357837 | + T2D risk | TSS1500 |
| cg17474248    | TAB2     | chr6  | 0.104384255 | - T2D risk | 5'UTR   |
| cg17474248    | TAB2     | chr6  | 0.104384255 | - T2D risk | Body    |
| cg14337526    | RAP2A    | chr13 | 0.104594284 | - T2D risk | 5'UTR   |
| cg14337526    | RAP2A    | chr13 | 0.104594284 | - T2D risk | 1stExon |
| cg03224259    | ZHX2     | chr8  | 0.1046514   | - T2D risk | 5'UTR   |
| cg25315613    | TSHZ1    | chr18 | 0.104759277 | + T2D risk | 5'UTR   |
| cg25315613    | TSHZ1    | chr18 | 0.104759277 | + T2D risk | Body    |



|            |                 |       |             |            |         |
|------------|-----------------|-------|-------------|------------|---------|
| cg16932062 | <i>PFKFB2</i>   | chr1  | 0.104771355 | + T2D risk | TSS1500 |
| cg15678508 | <i>PRKAG2</i>   | chr7  | 0.104910301 | + T2D risk | 5'UTR   |
| cg15678508 | <i>PRKAG2</i>   | chr7  | 0.104910301 | + T2D risk | Body    |
| cg01845076 | <i>RAP1GAP2</i> | chr17 | 0.1049206   | - T2D risk | Body    |
| cg03914346 | <i>KREMEN1</i>  | chr22 | 0.104954409 | - T2D risk | Body    |
| cg22721243 | <i>ATXN1</i>    | chr6  | 0.105020209 | - T2D risk | Body    |
| cg11331655 | <i>SLIT3</i>    | chr5  | 0.105025389 | + T2D risk | Body    |
| cg15211333 | <i>SRPK2</i>    | chr7  | 0.105042383 | - T2D risk | Body    |
| cg15211333 | <i>SRPK2</i>    | chr7  | 0.105042383 | - T2D risk | TSS1500 |
| cg14313834 | <i>CUX1</i>     | chr7  | 0.105073638 | + T2D risk | Body    |
| cg04956866 | <i>SLIT3</i>    | chr5  | 0.105107429 | + T2D risk | Body    |
| cg15705342 | <i>DNAJC13</i>  | chr3  | 0.10531611  | - T2D risk | TSS1500 |
| cg05692641 | <i>ENAH</i>     | chr1  | 0.105370396 | - T2D risk | Body    |
| cg11650102 | <i>SGSM2</i>    | chr17 | 0.105375549 | + T2D risk | Body    |
| cg21074468 | <i>ATXN1</i>    | chr6  | 0.105481626 | - T2D risk | 5'UTR   |
| cg23876106 | <i>WWP2</i>     | chr16 | 0.1055579   | - T2D risk | Body    |
| cg06642158 | <i>CREBBP</i>   | chr16 | 0.105586095 | - T2D risk | Body    |
| cg11774413 | <i>CLOCK</i>    | chr4  | 0.105635792 | - T2D risk | 5'UTR   |
| cg19731158 | <i>ROBO2</i>    | chr3  | 0.105671473 | - T2D risk | 5'UTR   |
| cg19731158 | <i>ROBO2</i>    | chr3  | 0.105671473 | - T2D risk | Body    |
| cg26632162 | <i>ZRANB1</i>   | chr10 | 0.105706621 | - T2D risk | Body    |
| cg18876162 | <i>TANC2</i>    | chr17 | 0.105724708 | - T2D risk | Body    |
| cg14768415 | <i>FAM160A1</i> | chr4  | 0.105831136 | + T2D risk | 5'UTR   |
| cg13617074 | <i>MEIS2</i>    | chr15 | 0.105911731 | + T2D risk | Body    |
| cg17016175 | <i>TMEM131</i>  | chr2  | 0.105919546 | - T2D risk | Body    |
| cg04779726 | <i>PRKAG2</i>   | chr7  | 0.105926676 | - T2D risk | TSS200  |
| cg04779726 | <i>PRKAG2</i>   | chr7  | 0.105926676 | - T2D risk | 5'UTR   |
| cg04779726 | <i>PRKAG2</i>   | chr7  | 0.105926676 | - T2D risk | Body    |
| cg04787417 | <i>ROBO2</i>    | chr3  | 0.106000852 | - T2D risk | TSS1500 |
| cg04787417 | <i>ROBO2</i>    | chr3  | 0.106000852 | - T2D risk | Body    |
| cg23570433 | <i>CTR9</i>     | chr11 | 0.106065446 | - T2D risk | 1stExon |
| cg23570433 | <i>CTR9</i>     | chr11 | 0.106065446 | - T2D risk | 5'UTR   |
| cg11228744 | <i>ERC2</i>     | chr3  | 0.106112588 | - T2D risk | 3'UTR   |
| cg15400028 | <i>NPEPPS</i>   | chr17 | 0.106117892 | - T2D risk | TSS200  |
| cg07848601 | <i>RANBP17</i>  | chr5  | 0.106160856 | - T2D risk | Body    |
| cg04508138 | <i>KCNIP3</i>   | chr2  | 0.106206275 | + T2D risk | Body    |
| cg23432480 | <i>INPP4A</i>   | chr2  | 0.106272734 | + T2D risk | 5'UTR   |
| cg12182153 | <i>SLIT3</i>    | chr5  | 0.106484915 | - T2D risk | Body    |
| cg18742464 | <i>CLIC5</i>    | chr6  | 0.106546684 | + T2D risk | Body    |
| cg18912855 | <i>PACS2</i>    | chr14 | 0.106732895 | + T2D risk | Body    |
| cg03962691 | <i>NGF</i>      | chr1  | 0.106783077 | - T2D risk | TSS1500 |
| cg26918857 | <i>STX6</i>     | chr1  | 0.106791929 | - T2D risk | 5'UTR   |
| cg26918857 | <i>STX6</i>     | chr1  | 0.106791929 | - T2D risk | Body    |
| cg11733655 | <i>ADCY5</i>    | chr3  | 0.10685523  | - T2D risk | Body    |
| cg22044904 | <i>ADCY5</i>    | chr3  | 0.106863004 | - T2D risk | Body    |
| cg27325787 | <i>PRKCB</i>    | chr16 | 0.1069228   | - T2D risk | Body    |
| cg06316502 | <i>DIP2C</i>    | chr10 | 0.107181441 | + T2D risk | Body    |
| cg04633846 | <i>PHACTR1</i>  | chr6  | 0.107281044 | + T2D risk | Body    |
| cg23285761 | <i>DDHD2</i>    | chr8  | 0.107349506 | - T2D risk | 5'UTR   |
| cg23285761 | <i>DDHD2</i>    | chr8  | 0.107349506 | - T2D risk | TSS200  |
| cg01912731 | <i>CMTR1</i>    | chr6  | 0.107453668 | - T2D risk | TSS200  |
| cg02058924 | <i>CHFR</i>     | chr12 | 0.107526677 | + T2D risk | TSS1500 |
| cg00624878 | <i>CREBBP</i>   | chr16 | 0.107620623 | - T2D risk | Body    |
| cg16671238 | <i>CRYL1</i>    | chr13 | 0.107676947 | + T2D risk | Body    |
| cg11418389 | <i>KCNIP3</i>   | chr2  | 0.10768885  | + T2D risk | Body    |
| cg16323293 | <i>PACRG</i>    | chr6  | 0.10769575  | + T2D risk | Body    |
| cg09777775 | <i>AGPAT3</i>   | chr21 | 0.107753837 | - T2D risk | 5'UTR   |
| cg14718326 | <i>ST6GAL1</i>  | chr3  | 0.107815133 | - T2D risk | 5'UTR   |
| cg23482190 | <i>APC</i>      | chr5  | 0.107916333 | + T2D risk | Body    |
| cg03706875 | <i>DIP2C</i>    | chr10 | 0.107926535 | + T2D risk | Body    |
| cg27591668 | <i>PRKCE</i>    | chr2  | 0.107937773 | + T2D risk | Body    |
| cg04298196 | <i>PDE5A</i>    | chr4  | 0.108108999 | - T2D risk | Body    |
| cg04298196 | <i>PDE5A</i>    | chr4  | 0.108108999 | - T2D risk | TSS200  |
| cg04298196 | <i>PDE5A</i>    | chr4  | 0.108108999 | - T2D risk | TSS1500 |
| cg16637690 | <i>WWP2</i>     | chr16 | 0.108242745 | + T2D risk | Body    |
| cg04002957 | <i>CHID1</i>    | chr11 | 0.108245951 | + T2D risk | Body    |
| cg15211596 | <i>AMD1</i>     | chr6  | 0.108264036 | - T2D risk | TSS200  |
| cg11625983 | <i>AGPAT3</i>   | chr21 | 0.108288095 | + T2D risk | 5'UTR   |
| cg27028281 | <i>ANK2</i>     | chr4  | 0.108360123 | + T2D risk | Body    |
| cg23688819 | <i>TSHZ1</i>    | chr18 | 0.108397115 | - T2D risk | 5'UTR   |



|            |                  |       |             |            |         |
|------------|------------------|-------|-------------|------------|---------|
| cg23688819 | <i>TSHZ1</i>     | chr18 | 0.108397115 | - T2D risk | Body    |
| cg21161891 | <i>KDR</i>       | chr4  | 0.108428152 | - T2D risk | TSS200  |
| cg09527670 | <i>KDM4B</i>     | chr19 | 0.108543325 | + T2D risk | Body    |
| cg02078001 | <i>UXS1</i>      | chr2  | 0.108565694 | + T2D risk | Body    |
| cg02078001 | <i>UXS1</i>      | chr2  | 0.108565694 | + T2D risk | TSS1500 |
| cg05868813 | <i>ATP8A2</i>    | chr13 | 0.108681939 | + T2D risk | 3'UTR   |
| cg08019914 | <i>ANK3</i>      | chr10 | 0.108691042 | - T2D risk | TSS1500 |
| cg08019914 | <i>ANK3</i>      | chr10 | 0.108691042 | - T2D risk | Body    |
| cg27655494 | <i>RGS7</i>      | chr1  | 0.108792563 | - T2D risk | Body    |
| cg00765035 | <i>SLC30A8</i>   | chr8  | 0.108817549 | - T2D risk | TSS200  |
| cg00765035 | <i>SLC30A8</i>   | chr8  | 0.108817549 | - T2D risk | 5'UTR   |
| cg25928742 | <i>KCNIP3</i>    | chr2  | 0.108843331 | - T2D risk | Body    |
| cg21860452 | <i>MTHFS</i>     | chr15 | 0.108911049 | - T2D risk | TSS1500 |
| cg14317651 | <i>GALK2</i>     | chr15 | 0.108984086 | + T2D risk | 5'UTR   |
| cg14317651 | <i>GALK2</i>     | chr15 | 0.108984086 | + T2D risk | 1stExon |
| cg07260778 | <i>WWP2</i>      | chr16 | 0.109031305 | + T2D risk | 5'UTR   |
| cg07260778 | <i>WWP2</i>      | chr16 | 0.109031305 | + T2D risk | Body    |
| cg17659896 | <i>ACTN4</i>     | chr19 | 0.109059019 | + T2D risk | 3'UTR   |
| cg01132598 | <i>TMEM219</i>   | chr16 | 0.109071125 | - T2D risk | TSS1500 |
| cg27129731 | <i>MEIS2</i>     | chr15 | 0.109107504 | - T2D risk | 5'UTR   |
| cg27129731 | <i>MEIS2</i>     | chr15 | 0.109107504 | - T2D risk | TSS1500 |
| cg15989168 | <i>ANK2</i>      | chr4  | 0.109250672 | - T2D risk | Body    |
| cg17468386 | <i>DDC</i>       | chr7  | 0.10925216  | - T2D risk | 5'UTR   |
| cg12334034 | <i>CUX2</i>      | chr12 | 0.109270932 | + T2D risk | Body    |
| cg02508994 | <i>KIAA1217</i>  | chr10 | 0.109377979 | + T2D risk | 5'UTR   |
| cg02508994 | <i>KIAA1217</i>  | chr10 | 0.109377979 | + T2D risk | Body    |
| cg15070283 | <i>RAP1GAP2</i>  | chr17 | 0.109488707 | - T2D risk | Body    |
| cg16569373 | <i>CREBBP</i>    | chr16 | 0.109535449 | + T2D risk | Body    |
| cg10064922 | <i>DIP2C</i>     | chr10 | 0.10959086  | + T2D risk | Body    |
| cg16106903 | <i>APC</i>       | chr5  | 0.109676822 | + T2D risk | Body    |
| cg06661685 | <i>TPCN1</i>     | chr12 | 0.109806394 | - T2D risk | Body    |
| cg23703633 | <i>ANK3</i>      | chr10 | 0.109841132 | - T2D risk | Body    |
| cg17748326 | <i>NUCB2</i>     | chr11 | 0.10986738  | - T2D risk | Body    |
| cg13351698 | <i>HNRNPA2B1</i> | chr7  | 0.109903252 | + T2D risk | TSS200  |
| cg04835087 | <i>CLEC16A</i>   | chr16 | 0.109930247 | - T2D risk | Body    |
| cg26810845 | <i>SCGN</i>      | chr6  | 0.109971644 | + T2D risk | TSS1500 |
| cg07235868 | <i>SGSM2</i>     | chr17 | 0.109991914 | + T2D risk | Body    |
| cg06340679 | <i>KDM4B</i>     | chr19 | 0.11000065  | + T2D risk | Body    |
| cg23060193 | <i>GGPS1</i>     | chr1  | 0.110086325 | - T2D risk | TSS1500 |
| cg25220460 | <i>ZHX2</i>      | chr8  | 0.110149901 | - T2D risk | TSS1500 |
| cg19764295 | <i>CALD1</i>     | chr7  | 0.11035038  | + T2D risk | Body    |
| cg24504442 | <i>MEIS2</i>     | chr15 | 0.110409172 | - T2D risk | 5'UTR   |
| cg24504442 | <i>MEIS2</i>     | chr15 | 0.110409172 | - T2D risk | 1stExon |
| cg24504442 | <i>MEIS2</i>     | chr15 | 0.110409172 | - T2D risk | TSS200  |
| cg24504442 | <i>MEIS2</i>     | chr15 | 0.110409172 | - T2D risk | TSS1500 |
| cg23559680 | <i>HMBX1</i>     | chr8  | 0.110451796 | - T2D risk | TSS1500 |
| cg24521747 | <i>TSC22D1</i>   | chr13 | 0.110535261 | - T2D risk | TSS1500 |
| cg24521747 | <i>TSC22D1</i>   | chr13 | 0.110535261 | - T2D risk | Body    |
| cg17050526 | <i>TENM2</i>     | chr5  | 0.11062386  | - T2D risk | Body    |
| cg08571859 | <i>APC</i>       | chr5  | 0.110634024 | + T2D risk | TSS1500 |
| cg08571859 | <i>APC</i>       | chr5  | 0.110634024 | + T2D risk | 5'UTR   |
| cg16855510 | <i>KIAA1217</i>  | chr10 | 0.110635119 | + T2D risk | 5'UTR   |
| cg02295205 | <i>TSGA10</i>    | chr2  | 0.11069321  | + T2D risk | 5'UTR   |
| cg02295205 | <i>TSGA10</i>    | chr2  | 0.11069321  | + T2D risk | TSS200  |
| cg02140753 | <i>CNTROB</i>    | chr17 | 0.110733535 | - T2D risk | 1stExon |
| cg02140753 | <i>CNTROB</i>    | chr17 | 0.110733535 | - T2D risk | 5'UTR   |
| cg15639387 | <i>DIP2C</i>     | chr10 | 0.110737479 | + T2D risk | Body    |
| cg25722465 | <i>KDR</i>       | chr4  | 0.110755077 | - T2D risk | 1stExon |
| cg25722465 | <i>KDR</i>       | chr4  | 0.110755077 | - T2D risk | 5'UTR   |
| cg11883881 | <i>CUX1</i>      | chr7  | 0.110756299 | + T2D risk | Body    |
| cg26154884 | <i>INPP4A</i>    | chr2  | 0.110869465 | + T2D risk | TSS1500 |
| cg11365244 | <i>PRKCE</i>     | chr2  | 0.110902386 | + T2D risk | Body    |
| cg00520096 | <i>EV15</i>      | chr1  | 0.110925489 | - T2D risk | Body    |
| cg16616838 | <i>LYVE1</i>     | chr11 | 0.110934451 | - T2D risk | 3'UTR   |
| cg13840007 | <i>PLAGL1</i>    | chr6  | 0.110983798 | + T2D risk | 5'UTR   |
| cg08858787 | <i>RAP1GAP2</i>  | chr17 | 0.110993806 | + T2D risk | Body    |
| cg02819231 | <i>FBXL2</i>     | chr3  | 0.111032653 | - T2D risk | TSS200  |
| cg16529636 | <i>ERC2</i>      | chr3  | 0.111058972 | - T2D risk | 3'UTR   |
| cg07559427 | <i>DYNC111</i>   | chr7  | 0.111116726 | - T2D risk | Body    |
| cg07531072 | <i>WIZ</i>       | chr19 | 0.111144801 | - T2D risk | 5'UTR   |



|            |          |       |             |            |         |
|------------|----------|-------|-------------|------------|---------|
| cg13363417 | KIAA1217 | chr10 | 0.111336668 | + T2D risk | TSS1500 |
| cg03677021 | WDR47    | chr1  | 0.111343351 | - T2D risk | 5'UTR   |
| cg00497086 | PRKCB    | chr16 | 0.111356144 | - T2D risk | Body    |
| cg18736186 | GALK2    | chr15 | 0.111376833 | - T2D risk | Body    |
| cg18736186 | GALK2    | chr15 | 0.111376833 | - T2D risk | TSS1500 |
| cg12176856 | PDE8A    | chr15 | 0.111410601 | + T2D risk | Body    |
| cg00871487 | RANBP17  | chr5  | 0.111435018 | - T2D risk | TSS200  |
| cg07510510 | SPOCK1   | chr5  | 0.111516556 | + T2D risk | Body    |
| cg10589408 | PTP4A2   | chr1  | 0.111613091 | + T2D risk | 5'UTR   |
| cg02746432 | CADM1    | chr11 | 0.111664846 | + T2D risk | Body    |
| cg15191465 | PDE5A    | chr4  | 0.111678227 | - T2D risk | Body    |
| cg15191465 | PDE5A    | chr4  | 0.111678227 | - T2D risk | TSS1500 |
| cg15191465 | PDE5A    | chr4  | 0.111678227 | - T2D risk | 5'UTR   |
| cg27568360 | DIP2C    | chr10 | 0.11169971  | - T2D risk | Body    |
| cg03761343 | DNAH9    | chr17 | 0.111746161 | - T2D risk | 5'UTR   |
| cg03761343 | DNAH9    | chr17 | 0.111746161 | - T2D risk | Body    |
| cg10186605 | NF1      | chr17 | 0.111885996 | + T2D risk | Body    |
| cg17786661 | DIP2C    | chr10 | 0.111912778 | + T2D risk | Body    |
| cg26028853 | ZHX2     | chr8  | 0.112138068 | - T2D risk | 5'UTR   |
| cg21495385 | BCAT1    | chr12 | 0.11220262  | - T2D risk | Body    |
| cg20021470 | ACSS2    | chr20 | 0.11228647  | + T2D risk | Body    |
| cg11095048 | TMEM131  | chr2  | 0.112586049 | - T2D risk | Body    |
| cg01975035 | POLA1    | chrX  | 0.112633162 | - T2D risk | Body    |
| cg11351331 | ATXN1    | chr6  | 0.112647334 | + T2D risk | 5'UTR   |
| cg15704369 | PRKACB   | chr1  | 0.112695144 | - T2D risk | TSS200  |
| cg19576214 | FBXL2    | chr3  | 0.112717407 | - T2D risk | Body    |
| cg12315249 | SLIT3    | chr5  | 0.112749857 | - T2D risk | Body    |
| cg25046621 | ASXL2    | chr2  | 0.112802416 | - T2D risk | Body    |
| cg03684232 | PLEKHG3  | chr14 | 0.112825733 | + T2D risk | 5'UTR   |
| cg06017944 | MEIS2    | chr15 | 0.112844469 | - T2D risk | Body    |
| cg13858310 | ATP8A1   | chr4  | 0.112985588 | - T2D risk | Body    |
| cg17944161 | NOTCH3   | chr19 | 0.11309008  | + T2D risk | TSS200  |
| cg00697129 | KIAA1217 | chr10 | 0.113117019 | - T2D risk | 1stExon |
| cg00697129 | KIAA1217 | chr10 | 0.113117019 | - T2D risk | 5'UTR   |
| cg04579885 | DIP2C    | chr10 | 0.113147303 | - T2D risk | Body    |
| cg20931902 | PTPRU    | chr1  | 0.113154915 | - T2D risk | Body    |
| cg20415600 | LAMA4    | chr6  | 0.113313705 | + T2D risk | Body    |
| cg10309642 | DYNC111  | chr7  | 0.113321628 | - T2D risk | Body    |
| cg04074945 | PHF21A   | chr11 | 0.113351225 | + T2D risk | Body    |
| cg12544123 | ENAH     | chr1  | 0.113371929 | - T2D risk | Body    |
| cg22671691 | KIAA1217 | chr10 | 0.113449496 | - T2D risk | Body    |
| cg08512168 | ROBO2    | chr3  | 0.11345169  | + T2D risk | 1stExon |
| cg08512168 | ROBO2    | chr3  | 0.11345169  | + T2D risk | Body    |
| cg26871959 | SKAP1    | chr17 | 0.113496955 | - T2D risk | Body    |
| cg06266100 | LMCD1    | chr3  | 0.113500574 | + T2D risk | Body    |
| cg05688350 | PHACTR1  | chr6  | 0.113529347 | - T2D risk | ExonBnd |
| cg05688350 | PHACTR1  | chr6  | 0.113529347 | - T2D risk | Body    |
| cg08717398 | ZHX2     | chr8  | 0.1135617   | + T2D risk | 5'UTR   |
| cg05339557 | NGLY1    | chr3  | 0.113583286 | - T2D risk | Body    |
| cg05339557 | NGLY1    | chr3  | 0.113583286 | - T2D risk | TSS200  |
| cg12661206 | DYNC111  | chr7  | 0.113702723 | - T2D risk | 5'UTR   |
| cg06969287 | TTC28    | chr22 | 0.113886732 | - T2D risk | Body    |
| cg22839114 | RAP1B    | chr12 | 0.113886863 | + T2D risk | 5'UTR   |
| cg00462004 | RTN4     | chr2  | 0.11388855  | + T2D risk | Body    |
| cg11020141 | ARL15    | chr5  | 0.11394348  | + T2D risk | Body    |
| cg19402236 | FLT1     | chr13 | 0.114055985 | + T2D risk | Body    |
| cg10728282 | PHF21A   | chr11 | 0.114090449 | + T2D risk | Body    |
| cg14628889 | TSGA10   | chr2  | 0.114115258 | + T2D risk | TSS1500 |
| cg14628889 | TSGA10   | chr2  | 0.114115258 | + T2D risk | 5'UTR   |
| cg11291872 | STX6     | chr1  | 0.11412225  | + T2D risk | 5'UTR   |
| cg11291872 | STX6     | chr1  | 0.11412225  | + T2D risk | Body    |
| cg16761843 | TENM2    | chr5  | 0.114125221 | - T2D risk | Body    |
| cg04164437 | ANK3     | chr10 | 0.114127439 | - T2D risk | Body    |
| cg13403290 | NUP98    | chr11 | 0.114164724 | - T2D risk | Body    |
| cg23981770 | ARHGEF9  | chrX  | 0.114317046 | + T2D risk | Body    |
| cg23981770 | ARHGEF9  | chrX  | 0.114317046 | + T2D risk | 5'UTR   |
| cg23615959 | NUP98    | chr11 | 0.114323284 | + T2D risk | 5'UTR   |
| cg20282780 | NCOA2    | chr8  | 0.114341345 | + T2D risk | 5'UTR   |
| cg25133475 | USP53    | chr4  | 0.114415085 | - T2D risk | TSS200  |
| cg21850879 | NF1      | chr17 | 0.114491448 | - T2D risk | Body    |



|            |                 |       |             |            |         |
|------------|-----------------|-------|-------------|------------|---------|
| cg08950886 | <i>ITGB1</i>    | chr10 | 0.114519024 | - T2D risk | TSS200  |
| cg08950886 | <i>ITGB1</i>    | chr10 | 0.114519024 | - T2D risk | TSS1500 |
| cg15119592 | <i>INPP4A</i>   | chr2  | 0.114519361 | + T2D risk | Body    |
| cg26422132 | <i>SSBP2</i>    | chr5  | 0.114520602 | - T2D risk | Body    |
| cg19764940 | <i>KDM4B</i>    | chr19 | 0.11455659  | + T2D risk | Body    |
| cg09790565 | <i>ULK4</i>     | chr3  | 0.114565595 | + T2D risk | Body    |
| cg11967765 | <i>GNA12</i>    | chr7  | 0.114572092 | - T2D risk | Body    |
| cg13358196 | <i>SEZ6L</i>    | chr22 | 0.114578377 | + T2D risk | Body    |
| cg10364862 | <i>CLEC16A</i>  | chr16 | 0.114592166 | + T2D risk | Body    |
| cg19325220 | <i>RAP2A</i>    | chr13 | 0.114649586 | - T2D risk | TSS200  |
| cg11218876 | <i>PHACTR1</i>  | chr6  | 0.114649666 | - T2D risk | ExonBnd |
| cg11218876 | <i>PHACTR1</i>  | chr6  | 0.114649666 | - T2D risk | 5'UTR   |
| cg21819722 | <i>ATP8A1</i>   | chr4  | 0.11478487  | - T2D risk | Body    |
| cg15578140 | <i>CNTNAP2</i>  | chr7  | 0.114864928 | + T2D risk | Body    |
| cg26953234 | <i>GPC4</i>     | chrX  | 0.115007118 | + T2D risk | Body    |
| cg10501704 | <i>PRKD1</i>    | chr14 | 0.115046186 | - T2D risk | Body    |
| cg14429457 | <i>DIP2C</i>    | chr10 | 0.11505837  | + T2D risk | Body    |
| cg15399131 | <i>RANBP17</i>  | chr5  | 0.115059857 | - T2D risk | Body    |
| cg22207272 | <i>CADM1</i>    | chr11 | 0.115093213 | - T2D risk | TSS1500 |
| cg11639849 | <i>EIF4EBP3</i> | chr5  | 0.115112595 | - T2D risk | Body    |
| cg19706697 | <i>KIAA1217</i> | chr10 | 0.115154471 | - T2D risk | 5'UTR   |
| cg19706697 | <i>KIAA1217</i> | chr10 | 0.115154471 | - T2D risk | Body    |
| cg01252513 | <i>CUX2</i>     | chr12 | 0.115175158 | + T2D risk | Body    |
| cg15153756 | <i>GRK5</i>     | chr10 | 0.115302011 | - T2D risk | Body    |
| cg04756223 | <i>PRKCE</i>    | chr2  | 0.115315386 | - T2D risk | Body    |
| cg11998420 | <i>APBA1</i>    | chr9  | 0.115316723 | - T2D risk | 5'UTR   |
| cg08995473 | <i>RANBP17</i>  | chr5  | 0.115573424 | - T2D risk | Body    |
| cg03586428 | <i>CHID1</i>    | chr11 | 0.115582565 | + T2D risk | Body    |
| cg16951566 | <i>WDR48</i>    | chr3  | 0.115655611 | - T2D risk | Body    |
| cg02608511 | <i>NCOA2</i>    | chr8  | 0.115659499 | + T2D risk | 5'UTR   |
| cg21470711 | <i>PCYT1A</i>   | chr3  | 0.115808842 | - T2D risk | Body    |
| cg07062857 | <i>FBXO11</i>   | chr2  | 0.115828586 | - T2D risk | TSS1500 |
| cg09224379 | <i>CLEC16A</i>  | chr16 | 0.115889236 | + T2D risk | Body    |
| cg19061228 | <i>GPC4</i>     | chrX  | 0.115896739 | - T2D risk | Body    |
| cg00632784 | <i>DDC</i>      | chr7  | 0.115925855 | - T2D risk | Body    |
| cg21367187 | <i>JPH2</i>     | chr20 | 0.115942983 | + T2D risk | Body    |
| cg12916973 | <i>CALD1</i>    | chr7  | 0.116072407 | - T2D risk | 5'UTR   |
| cg04764064 | <i>KIAA0232</i> | chr4  | 0.116113466 | - T2D risk | Body    |
| cg24593582 | <i>MYO6</i>     | chr6  | 0.116130624 | - T2D risk | Body    |
| cg03006426 | <i>SPOCK1</i>   | chr5  | 0.1161939   | - T2D risk | Body    |
| cg16915437 | <i>CHID1</i>    | chr11 | 0.116238875 | + T2D risk | Body    |
| cg13645221 | <i>PHACTR1</i>  | chr6  | 0.116259223 | - T2D risk | Body    |
| cg22593874 | <i>ANK2</i>     | chr4  | 0.116266581 | + T2D risk | Body    |
| cg02232863 | <i>PFKFB2</i>   | chr1  | 0.116477134 | + T2D risk | Body    |
| cg23565244 | <i>KDM4B</i>    | chr19 | 0.116549282 | - T2D risk | Body    |
| cg23657947 | <i>CNTROB</i>   | chr17 | 0.116637277 | - T2D risk | Body    |
| cg12267883 | <i>UBL3</i>     | chr13 | 0.116731619 | + T2D risk | TSS200  |
| cg24856797 | <i>POLA1</i>    | chrX  | 0.116770306 | + T2D risk | Body    |
| cg18853010 | <i>PACS2</i>    | chr14 | 0.116781382 | + T2D risk | Body    |
| cg22433677 | <i>DYNC111</i>  | chr7  | 0.116825863 | + T2D risk | Body    |
| cg16051718 | <i>KIAA0232</i> | chr4  | 0.117028742 | + T2D risk | Body    |
| cg21658836 | <i>CADM1</i>    | chr11 | 0.117132267 | + T2D risk | 5'UTR   |
| cg21658836 | <i>CADM1</i>    | chr11 | 0.117132267 | + T2D risk | 1stExon |
| cg21632531 | <i>ANK3</i>     | chr10 | 0.11716037  | - T2D risk | Body    |
| cg22300819 | <i>ATP6V1H</i>  | chr8  | 0.117171916 | - T2D risk | TSS200  |
| cg22300819 | <i>ATP6V1H</i>  | chr8  | 0.117171916 | - T2D risk | TSS1500 |
| cg15174682 | <i>KDM4B</i>    | chr19 | 0.117259079 | - T2D risk | Body    |
| cg09444036 | <i>DIP2C</i>    | chr10 | 0.117305574 | - T2D risk | Body    |
| cg19909729 | <i>NUP98</i>    | chr11 | 0.1173905   | + T2D risk | Body    |
| cg15563735 | <i>SPOCK1</i>   | chr5  | 0.117460326 | - T2D risk | Body    |
| cg01308737 | <i>DIP2C</i>    | chr10 | 0.117484143 | + T2D risk | Body    |
| cg25949550 | <i>CNTNAP2</i>  | chr7  | 0.117524244 | + T2D risk | Body    |
| cg13057368 | <i>SSB</i>      | chr2  | 0.117627351 | - T2D risk | 1stExon |
| cg13057368 | <i>SSB</i>      | chr2  | 0.117627351 | - T2D risk | 5'UTR   |
| cg25143247 | <i>PACRG</i>    | chr6  | 0.117682113 | + T2D risk | Body    |
| cg12512564 | <i>ST6GAL1</i>  | chr3  | 0.1177197   | + T2D risk | 5'UTR   |
| cg11939736 | <i>PHF21A</i>   | chr11 | 0.117752584 | - T2D risk | Body    |
| cg03063710 | <i>DYNC111</i>  | chr7  | 0.11777373  | - T2D risk | Body    |
| cg13151023 | <i>MAN1A1</i>   | chr6  | 0.11782028  | + T2D risk | Body    |
| cg19302441 | <i>CLIC5</i>    | chr6  | 0.117842842 | - T2D risk | 5'UTR   |



|            |          |       |             |            |         |
|------------|----------|-------|-------------|------------|---------|
| cg19302441 | CLIC5    | chr6  | 0.117842842 | - T2D risk | 1stExon |
| cg25405127 | NQO1     | chr16 | 0.117861762 | + T2D risk | Body    |
| cg14396453 | SPOCK1   | chr5  | 0.117888329 | - T2D risk | Body    |
| cg08278453 | FNIP2    | chr4  | 0.117907787 | - T2D risk | Body    |
| cg11295009 | DNAH9    | chr17 | 0.11795014  | - T2D risk | ExonBnd |
| cg11295009 | DNAH9    | chr17 | 0.11795014  | - T2D risk | Body    |
| cg16954725 | DIP2C    | chr10 | 0.118051634 | + T2D risk | Body    |
| cg26827630 | ITPKB    | chr1  | 0.118066167 | + T2D risk | Body    |
| cg06128826 | STX6     | chr1  | 0.118093244 | + T2D risk | Body    |
| cg17689614 | KIAA0355 | chr19 | 0.118126401 | - T2D risk | ExonBnd |
| cg17689614 | KIAA0355 | chr19 | 0.118126401 | - T2D risk | Body    |
| cg24686224 | FARSB    | chr2  | 0.118164808 | - T2D risk | Body    |
| cg08025156 | RANBP17  | chr5  | 0.118371658 | + T2D risk | Body    |
| cg03217729 | CLEC16A  | chr16 | 0.11847616  | + T2D risk | Body    |
| cg05852740 | ANK3     | chr10 | 0.118514418 | - T2D risk | Body    |
| cg02288859 | KREMEN1  | chr22 | 0.118547874 | - T2D risk | Body    |
| cg11903987 | DIP2C    | chr10 | 0.118746518 | + T2D risk | Body    |
| cg01795204 | NUCB2    | chr11 | 0.118833543 | + T2D risk | Body    |
| cg15270350 | BIRC5    | chr17 | 0.118858541 | - T2D risk | Body    |
| cg02555393 | ITPKB    | chr1  | 0.118897453 | - T2D risk | Body    |
| cg12551746 | DNAJC13  | chr3  | 0.11890556  | + T2D risk | 5'UTR   |
| cg04724408 | TMEM131  | chr2  | 0.118947361 | - T2D risk | Body    |
| cg09274418 | CRYL1    | chr13 | 0.119043469 | + T2D risk | Body    |
| cg12936622 | TAB2     | chr6  | 0.119141789 | + T2D risk | Body    |
| cg03935228 | SRPK2    | chr7  | 0.119197183 | + T2D risk | Body    |
| cg05679113 | BIRC5    | chr17 | 0.119230015 | + T2D risk | TSS200  |
| cg24141911 | SLIT3    | chr5  | 0.119318425 | + T2D risk | Body    |
| cg09101235 | CUL1     | chr7  | 0.119380109 | + T2D risk | Body    |
| cg01243950 | PRKCE    | chr2  | 0.119407783 | + T2D risk | Body    |
| cg03504865 | DKK2     | chr4  | 0.119427815 | + T2D risk | TSS1500 |
| cg11343870 | CHKA     | chr11 | 0.119562241 | - T2D risk | TSS200  |
| cg17335746 | NUP98    | chr11 | 0.119580652 | - T2D risk | Body    |
| cg20420047 | SUB1     | chr5  | 0.119660789 | - T2D risk | TSS1500 |
| cg03482339 | DDHD2    | chr8  | 0.119681441 | - T2D risk | TSS1500 |
| cg03482339 | DDHD2    | chr8  | 0.119681441 | - T2D risk | TSS200  |
| cg03039691 | UBE2K    | chr4  | 0.119755153 | - T2D risk | Body    |
| cg22095604 | NOL4     | chr18 | 0.119794638 | - T2D risk | 5'UTR   |
| cg22095604 | NOL4     | chr18 | 0.119794638 | - T2D risk | 1stExon |
| cg23557597 | PRKCE    | chr2  | 0.119805265 | - T2D risk | Body    |
| cg12776754 | DACH1    | chr13 | 0.119827456 | - T2D risk | Body    |
| cg18088578 | PTPRU    | chr1  | 0.11994859  | + T2D risk | ExonBnd |
| cg18088578 | PTPRU    | chr1  | 0.11994859  | + T2D risk | Body    |
| cg21483906 | CLASP2   | chr3  | 0.11995168  | - T2D risk | Body    |
| cg14628837 | RSF1     | chr11 | 0.119981619 | + T2D risk | Body    |
| cg21182423 | LMX1B    | chr9  | 0.12000251  | + T2D risk | 3'UTR   |
| cg26820118 | CNTNAP2  | chr7  | 0.120082338 | - T2D risk | Body    |
| cg05984202 | TSC22D1  | chr13 | 0.12009247  | - T2D risk | Body    |
| cg05984202 | TSC22D1  | chr13 | 0.12009247  | - T2D risk | 5'UTR   |
| cg05984202 | TSC22D1  | chr13 | 0.12009247  | - T2D risk | TSS200  |
| cg11909043 | KIAA1217 | chr10 | 0.120231685 | + T2D risk | Body    |
| cg09538603 | CLEC16A  | chr16 | 0.120257242 | + T2D risk | Body    |
| cg15075580 | ERC2     | chr3  | 0.120285191 | - T2D risk | Body    |
| cg18932987 | ACTN4    | chr19 | 0.12033459  | - T2D risk | Body    |
| cg21126583 | CNTNAP2  | chr7  | 0.120473898 | - T2D risk | TSS200  |
| cg19440866 | TBC1D5   | chr3  | 0.120508386 | + T2D risk | Body    |
| cg14584255 | PACRG    | chr6  | 0.120606055 | + T2D risk | 1stExon |
| cg14584255 | PACRG    | chr6  | 0.120606055 | + T2D risk | Body    |
| cg03184350 | CNTNAP2  | chr7  | 0.120710904 | + T2D risk | Body    |
| cg06930902 | FBXO11   | chr2  | 0.120842243 | - T2D risk | Body    |
| cg14743710 | CDH22    | chr20 | 0.12087332  | + T2D risk | Body    |
| cg15460793 | RET      | chr10 | 0.120903464 | - T2D risk | 3'UTR   |
| cg27234746 | RANBP17  | chr5  | 0.120940331 | - T2D risk | Body    |
| cg17781897 | SKAP1    | chr17 | 0.120952441 | + T2D risk | Body    |
| cg17592363 | SRPK2    | chr7  | 0.120982094 | - T2D risk | Body    |
| cg17592363 | SRPK2    | chr7  | 0.120982094 | - T2D risk | 5'UTR   |
| cg16518285 | CUX1     | chr7  | 0.121035765 | - T2D risk | Body    |
| cg22835523 | PDE8A    | chr15 | 0.121037969 | + T2D risk | Body    |
| cg14863830 | POC1B    | chr12 | 0.121245664 | - T2D risk | Body    |
| cg18482960 | TSGA10   | chr2  | 0.121367988 | + T2D risk | 5'UTR   |
| cg20282960 | KDM4B    | chr19 | 0.121413908 | - T2D risk | Body    |



|            |                 |       |             |            |         |
|------------|-----------------|-------|-------------|------------|---------|
| cg14143435 | <i>HMBOX1</i>   | chr8  | 0.121482868 | - T2D risk | TSS200  |
| cg14143435 | <i>HMBOX1</i>   | chr8  | 0.121482868 | - T2D risk | TSS1500 |
| cg17307558 | <i>DKK2</i>     | chr4  | 0.121601991 | + T2D risk | Body    |
| cg11843124 | <i>ZHX2</i>     | chr8  | 0.121654193 | + T2D risk | 5'UTR   |
| cg26256010 | <i>SMG7</i>     | chr1  | 0.121681284 | + T2D risk | TSS1500 |
| cg27093403 | <i>BCAT1</i>    | chr12 | 0.121753901 | + T2D risk | Body    |
| cg07290589 | <i>DNAH9</i>    | chr17 | 0.122085601 | - T2D risk | Body    |
| cg06376458 | <i>GLG1</i>     | chr16 | 0.122112353 | - T2D risk | Body    |
| cg00156769 | <i>SMG7</i>     | chr1  | 0.122143256 | + T2D risk | Body    |
| cg18002862 | <i>RAP1GAP2</i> | chr17 | 0.122175834 | + T2D risk | Body    |
| cg15819914 | <i>ASH1L</i>    | chr1  | 0.12217816  | - T2D risk | Body    |
| cg20477318 | <i>TIMM23</i>   | chr10 | 0.12222926  | - T2D risk | Body    |
| cg17810966 | <i>PDLIM5</i>   | chr4  | 0.122309126 | - T2D risk | Body    |
| cg16692004 | <i>TAB2</i>     | chr6  | 0.122311712 | + T2D risk | 5'UTR   |
| cg16692004 | <i>TAB2</i>     | chr6  | 0.122311712 | + T2D risk | TSS1500 |
| cg16692004 | <i>TAB2</i>     | chr6  | 0.122311712 | + T2D risk | Body    |
| cg16692004 | <i>TAB2</i>     | chr6  | 0.122311712 | + T2D risk | 1stExon |
| cg10508817 | <i>NGLY1</i>    | chr3  | 0.122380223 | - T2D risk | Body    |
| cg10508817 | <i>OXSM</i>     | chr3  | 0.122380223 | - T2D risk | TSS1500 |
| cg17664583 | <i>PRKCB</i>    | chr16 | 0.122435975 | + T2D risk | Body    |
| cg01115565 | <i>PTPRU</i>    | chr1  | 0.122445143 | - T2D risk | Body    |
| cg13604592 | <i>AGPAT3</i>   | chr21 | 0.122482881 | + T2D risk | Body    |
| cg11659739 | <i>RAP1GAP2</i> | chr17 | 0.122737812 | + T2D risk | 3'UTR   |
| cg08717219 | <i>TMEM150C</i> | chr4  | 0.122809884 | - T2D risk | 5'UTR   |
| cg26902323 | <i>RTN4</i>     | chr2  | 0.1228896   | - T2D risk | TSS1500 |
| cg26902323 | <i>RTN4</i>     | chr2  | 0.1228896   | - T2D risk | 1stExon |
| cg26902323 | <i>RTN4</i>     | chr2  | 0.1228896   | - T2D risk | 5'UTR   |
| cg17035881 | <i>ATP8A2</i>   | chr13 | 0.122894449 | + T2D risk | Body    |
| cg24161779 | <i>DNAH9</i>    | chr17 | 0.122902636 | + T2D risk | Body    |
| cg06866237 | <i>CUX1</i>     | chr7  | 0.122923243 | + T2D risk | Body    |
| cg14519294 | <i>CHFR</i>     | chr12 | 0.123030646 | + T2D risk | TSS1500 |
| cg11204485 | <i>CHID1</i>    | chr11 | 0.12307269  | + T2D risk | Body    |
| cg22499652 | <i>PRKACB</i>   | chr1  | 0.1230732   | - T2D risk | 5'UTR   |
| cg22499652 | <i>PRKACB</i>   | chr1  | 0.1230732   | - T2D risk | 1stExon |
| cg22499652 | <i>PRKACB</i>   | chr1  | 0.1230732   | - T2D risk | Body    |
| cg22499652 | <i>PRKACB</i>   | chr1  | 0.1230732   | - T2D risk | TSS1500 |
| cg04693928 | <i>LMX1B</i>    | chr9  | 0.123078354 | + T2D risk | Body    |
| cg03657103 | <i>CRYL1</i>    | chr13 | 0.123138422 | - T2D risk | Body    |
| cg01804281 | <i>NGF</i>      | chr1  | 0.123217774 | + T2D risk | 5'UTR   |
| cg11336887 | <i>PTPRU</i>    | chr1  | 0.123320171 | + T2D risk | Body    |
| cg14339765 | <i>CLIC5</i>    | chr6  | 0.123475736 | - T2D risk | TSS1500 |
| cg11542281 | <i>NCOA2</i>    | chr8  | 0.12348117  | + T2D risk | 5'UTR   |
| cg07828708 | <i>ARHGAP32</i> | chr11 | 0.123541596 | + T2D risk | Body    |
| cg08098619 | <i>NUP98</i>    | chr11 | 0.123543507 | - T2D risk | 5'UTR   |
| cg08098619 | <i>NUP98</i>    | chr11 | 0.123543507 | - T2D risk | 1stExon |
| cg10379479 | <i>ADCY5</i>    | chr3  | 0.123634682 | + T2D risk | Body    |
| cg11573170 | <i>DIP2C</i>    | chr10 | 0.123707954 | - T2D risk | Body    |
| cg24341711 | <i>DIP2C</i>    | chr10 | 0.123816501 | - T2D risk | Body    |
| cg12711746 | <i>CREBBP</i>   | chr16 | 0.123850894 | + T2D risk | Body    |
| cg10262747 | <i>ATXN1</i>    | chr6  | 0.123861857 | - T2D risk | 5'UTR   |
| cg06122080 | <i>OXSM</i>     | chr3  | 0.124152925 | - T2D risk | Body    |
| cg06122080 | <i>OXSM</i>     | chr3  | 0.124152925 | - T2D risk | 5'UTR   |
| cg06122080 | <i>NGLY1</i>    | chr3  | 0.124152925 | - T2D risk | TSS1500 |
| cg00042252 | <i>ASXL2</i>    | chr2  | 0.124377019 | - T2D risk | Body    |
| cg21953891 | <i>SLIT3</i>    | chr5  | 0.124407653 | - T2D risk | Body    |
| cg13200756 | <i>MYO6</i>     | chr6  | 0.124414251 | + T2D risk | TSS1500 |
| cg06471104 | <i>PICALM</i>   | chr11 | 0.124494675 | + T2D risk | TSS1500 |
| cg11046864 | <i>DIP2C</i>    | chr10 | 0.124612304 | - T2D risk | Body    |
| cg13795660 | <i>ACTN4</i>    | chr19 | 0.124755932 | + T2D risk | Body    |
| cg20063764 | <i>PACS2</i>    | chr14 | 0.124887597 | - T2D risk | Body    |
| cg13816130 | <i>COX6A1</i>   | chr12 | 0.124935747 | - T2D risk | TSS1500 |
| cg20227749 | <i>WWP2</i>     | chr16 | 0.12523906  | + T2D risk | TSS200  |
| cg21805228 | <i>CTR9</i>     | chr11 | 0.125249929 | - T2D risk | Body    |
| cg10072115 | <i>BCAT1</i>    | chr12 | 0.125263065 | + T2D risk | Body    |
| cg10072115 | <i>BCAT1</i>    | chr12 | 0.125263065 | + T2D risk | TSS200  |
| cg10072115 | <i>BCAT1</i>    | chr12 | 0.125263065 | + T2D risk | TSS1500 |
| cg15681145 | <i>HMBOX1</i>   | chr8  | 0.125278849 | - T2D risk | Body    |
| cg22951128 | <i>DIP2C</i>    | chr10 | 0.125294361 | - T2D risk | Body    |
| cg05197760 | <i>BCAT1</i>    | chr12 | 0.125307262 | - T2D risk | Body    |
| cg05197760 | <i>BCAT1</i>    | chr12 | 0.125307262 | - T2D risk | TSS1500 |



|            |           |       |             |            |         |
|------------|-----------|-------|-------------|------------|---------|
| cg17622131 | ERC2      | chr3  | 0.125315619 | - T2D risk | 5'UTR   |
| cg16949862 | SEC31A    | chr4  | 0.125316004 | + T2D risk | 5'UTR   |
| cg04950301 | PHACTR1   | chr6  | 0.12540456  | - T2D risk | Body    |
| cg10141938 | HNRNPA2B1 | chr7  | 0.125408808 | + T2D risk | Body    |
| cg23243419 | RHOQ      | chr2  | 0.125602759 | + T2D risk | Body    |
| cg06783197 | PACS2     | chr14 | 0.125609795 | - T2D risk | Body    |
| cg13857429 | PRKCE     | chr2  | 0.125619707 | - T2D risk | Body    |
| cg03823381 | PHACTR1   | chr6  | 0.125798831 | + T2D risk | Body    |
| cg15008879 | DNAJC1    | chr10 | 0.12582339  | - T2D risk | TSS200  |
| cg20416574 | FBXO11    | chr2  | 0.12582988  | + T2D risk | 5'UTR   |
| cg24938830 | UNC80     | chr2  | 0.125887717 | - T2D risk | TSS200  |
| cg05175062 | DIP2C     | chr10 | 0.125904135 | + T2D risk | Body    |
| cg27574877 | DNAJC1    | chr10 | 0.125983514 | - T2D risk | Body    |
| cg18582759 | KREMEN1   | chr22 | 0.126016757 | - T2D risk | Body    |
| cg12224165 | WIZ       | chr19 | 0.126160987 | - T2D risk | 5'UTR   |
| cg13055288 | SLC7A2    | chr8  | 0.12633719  | - T2D risk | TSS200  |
| cg13055288 | SLC7A2    | chr8  | 0.12633719  | - T2D risk | 5'UTR   |
| cg11907881 | AGPAT3    | chr21 | 0.12637308  | + T2D risk | 5'UTR   |
| cg08037620 | PCYT1A    | chr3  | 0.126385839 | - T2D risk | 5'UTR   |
| cg05077096 | RAP1GAP2  | chr17 | 0.126437079 | + T2D risk | Body    |
| cg19878838 | SCARB2    | chr4  | 0.126442438 | - T2D risk | TSS1500 |
| cg17000666 | TSC22D1   | chr13 | 0.126456126 | - T2D risk | Body    |
| cg01290565 | CUX2      | chr12 | 0.126544566 | - T2D risk | Body    |
| cg22431444 | MAN1A2    | chr1  | 0.126551858 | + T2D risk | Body    |
| cg02147637 | WWP2      | chr16 | 0.126765869 | - T2D risk | ExonBnd |
| cg02147637 | WWP2      | chr16 | 0.126765869 | - T2D risk | Body    |
| cg20903874 | PCYT1A    | chr3  | 0.126829482 | + T2D risk | 5'UTR   |
| cg08406486 | CUX2      | chr12 | 0.126832678 | - T2D risk | Body    |
| cg19260567 | CNTNAP2   | chr7  | 0.126856442 | + T2D risk | Body    |
| cg14982506 | KIAA1217  | chr10 | 0.12686599  | + T2D risk | Body    |
| cg09008705 | NGF       | chr1  | 0.126963736 | - T2D risk | TSS200  |
| cg27099500 | PLEKHG3   | chr14 | 0.126979559 | + T2D risk | TSS1500 |
| cg26034658 | PACS1     | chr11 | 0.127027946 | + T2D risk | TSS1500 |
| cg04362764 | PPP1R12A  | chr12 | 0.127066215 | - T2D risk | Body    |
| cg04362764 | PPP1R12A  | chr12 | 0.127066215 | - T2D risk | 5'UTR   |
| cg26433232 | IFT74     | chr9  | 0.127069154 | - T2D risk | Body    |
| cg22635363 | CNTNAP2   | chr7  | 0.127071489 | + T2D risk | Body    |
| cg07054040 | MEIS2     | chr15 | 0.127105449 | + T2D risk | 5'UTR   |
| cg07054040 | MEIS2     | chr15 | 0.127105449 | + T2D risk | 1stExon |
| cg07054040 | MEIS2     | chr15 | 0.127105449 | + T2D risk | TSS1500 |
| cg00428134 | SLIT3     | chr5  | 0.127146843 | - T2D risk | Body    |
| cg26090406 | COL4A1    | chr13 | 0.12716684  | - T2D risk | Body    |
| cg11796500 | TOX3      | chr16 | 0.127214929 | - T2D risk | Body    |
| cg15460531 | CUX1      | chr7  | 0.127219987 | + T2D risk | Body    |
| cg23772128 | KDM4B     | chr19 | 0.127254396 | - T2D risk | Body    |
| cg19555661 | EVI5      | chr1  | 0.127336438 | - T2D risk | Body    |
| cg08055647 | HNRNPA2B1 | chr7  | 0.12741368  | - T2D risk | Body    |
| cg02527088 | DIP2C     | chr10 | 0.127607046 | - T2D risk | Body    |
| cg26410484 | CHFR      | chr12 | 0.127640132 | + T2D risk | TSS1500 |
| cg20825437 | PRKCE     | chr2  | 0.1277568   | - T2D risk | 1stExon |
| cg00929870 | DIP2C     | chr10 | 0.127762216 | + T2D risk | Body    |
| cg05054278 | ARL8B     | chr3  | 0.127898413 | + T2D risk | Body    |
| cg10298298 | NPAT      | chr11 | 0.127973377 | - T2D risk | Body    |
| cg09381022 | PDE5A     | chr4  | 0.128278488 | + T2D risk | Body    |
| cg20369775 | TSC22D1   | chr13 | 0.128373174 | - T2D risk | Body    |
| cg09624923 | ITGB1     | chr10 | 0.128507958 | + T2D risk | 5'UTR   |
| cg26607103 | ANK3      | chr10 | 0.128636504 | + T2D risk | TSS200  |
| cg06348804 | MYO6      | chr6  | 0.128716387 | - T2D risk | TSS1500 |
| cg23108245 | CRYL1     | chr13 | 0.128728656 | - T2D risk | Body    |
| cg12032045 | TENM2     | chr5  | 0.128774224 | - T2D risk | Body    |
| cg00434021 | DIP2C     | chr10 | 0.128799158 | + T2D risk | Body    |
| cg14681086 | CDH22     | chr20 | 0.128855154 | + T2D risk | Body    |
| cg01667493 | CUX1      | chr7  | 0.128986005 | + T2D risk | Body    |
| cg12500226 | KIAA0232  | chr4  | 0.129100656 | + T2D risk | 5'UTR   |
| cg13034810 | PLEKHG3   | chr14 | 0.129111895 | + T2D risk | Body    |
| cg26553521 | ATP6V1A   | chr3  | 0.129167563 | + T2D risk | TSS200  |
| cg06792086 | TPCN1     | chr12 | 0.129208764 | + T2D risk | Body    |
| cg19553698 | DIP2C     | chr10 | 0.129294751 | + T2D risk | Body    |
| cg06632098 | RET       | chr10 | 0.129328557 | - T2D risk | Body    |
| cg21432513 | CHFR      | chr12 | 0.129329858 | - T2D risk | Body    |



|            |           |       |             |            |         |
|------------|-----------|-------|-------------|------------|---------|
| cg08222021 | ANK3      | chr10 | 0.12933522  | - T2D risk | Body    |
| cg04653639 | FLT1      | chr13 | 0.129405361 | + T2D risk | Body    |
| cg23144668 | ATRNL1    | chr10 | 0.1294277   | + T2D risk | 1stExon |
| cg23144668 | ATRNL1    | chr10 | 0.1294277   | + T2D risk | Body    |
| cg23144668 | ATRNL1    | chr10 | 0.1294277   | + T2D risk | 5'UTR   |
| cg25161882 | ANK2      | chr4  | 0.129449709 | - T2D risk | TSS1500 |
| cg25161882 | ANK2      | chr4  | 0.129449709 | - T2D risk | Body    |
| cg07461953 | PRKAG2    | chr7  | 0.129497547 | - T2D risk | 5'UTR   |
| cg07461953 | PRKAG2    | chr7  | 0.129497547 | - T2D risk | Body    |
| cg25490551 | ST8SIA1   | chr12 | 0.12952736  | - T2D risk | Body    |
| cg00150807 | ANK3      | chr10 | 0.129566561 | + T2D risk | Body    |
| cg21788878 | UBE2K     | chr4  | 0.12972648  | + T2D risk | Body    |
| cg03420907 | MGRN1     | chr16 | 0.129767982 | + T2D risk | Body    |
| cg03694644 | TSHZ1     | chr18 | 0.129793188 | - T2D risk | 5'UTR   |
| cg03694644 | TSHZ1     | chr18 | 0.129793188 | - T2D risk | Body    |
| cg06524757 | DACH1     | chr13 | 0.129804239 | - T2D risk | TSS200  |
| cg10842540 | WWP2      | chr16 | 0.129805156 | + T2D risk | 5'UTR   |
| cg10842540 | WWP2      | chr16 | 0.129805156 | + T2D risk | Body    |
| cg15096653 | CLOCK     | chr4  | 0.130006835 | - T2D risk | TSS1500 |
| cg11194305 | GRK5      | chr10 | 0.130022911 | + T2D risk | Body    |
| cg17122475 | DIP2C     | chr10 | 0.130083028 | + T2D risk | Body    |
| cg09358700 | EIF4EBP3  | chr5  | 0.130193191 | + T2D risk | Body    |
| cg19536177 | CUX2      | chr12 | 0.130227993 | + T2D risk | Body    |
| cg13328862 | ATP8A1    | chr4  | 0.130301711 | - T2D risk | Body    |
| cg04801961 | PRKCE     | chr2  | 0.130339389 | + T2D risk | Body    |
| cg07267296 | HMBX1     | chr8  | 0.130559163 | - T2D risk | 5'UTR   |
| cg02607972 | ASXL2     | chr2  | 0.130642759 | - T2D risk | 3'UTR   |
| cg03761291 | CREBBP    | chr16 | 0.130873097 | + T2D risk | Body    |
| cg06255020 | PRKCE     | chr2  | 0.130890269 | - T2D risk | Body    |
| cg09338041 | PRKCE     | chr2  | 0.131023337 | - T2D risk | Body    |
| cg27450850 | SCAF11    | chr12 | 0.13106459  | + T2D risk | Body    |
| cg18105800 | FBXL2     | chr3  | 0.131112009 | - T2D risk | Body    |
| cg26318926 | SKAP1     | chr17 | 0.131328248 | + T2D risk | Body    |
| cg07311649 | ST6GAL1   | chr3  | 0.131331332 | + T2D risk | 5'UTR   |
| cg06061693 | GGPS1     | chr1  | 0.131433977 | - T2D risk | TSS200  |
| cg06061693 | GGPS1     | chr1  | 0.131433977 | - T2D risk | 5'UTR   |
| cg06061693 | GGPS1     | chr1  | 0.131433977 | - T2D risk | 1stExon |
| cg18979085 | ITGA1     | chr5  | 0.131496098 | - T2D risk | Body    |
| cg01579024 | RANBP17   | chr5  | 0.131523399 | - T2D risk | TSS1500 |
| cg21250959 | PDE5A     | chr4  | 0.131539084 | - T2D risk | Body    |
| cg23205234 | CHID1     | chr11 | 0.131544384 | + T2D risk | Body    |
| cg05502525 | CLEC16A   | chr16 | 0.13155914  | - T2D risk | TSS200  |
| cg16694011 | CNTNAP2   | chr7  | 0.131732252 | + T2D risk | Body    |
| cg01969262 | PRKD1     | chr14 | 0.131768912 | + T2D risk | Body    |
| cg11744422 | PACS1     | chr11 | 0.131787086 | + T2D risk | Body    |
| cg27379240 | APC       | chr5  | 0.131854121 | - T2D risk | TSS1500 |
| cg17510038 | DENND4C   | chr9  | 0.13187697  | + T2D risk | Body    |
| cg26299089 | PLEKHG3   | chr14 | 0.131881199 | + T2D risk | TSS200  |
| cg09974122 | GRK5      | chr10 | 0.13201387  | + T2D risk | Body    |
| cg10077670 | ARPP19    | chr15 | 0.132038892 | - T2D risk | Body    |
| cg10077670 | ARPP19    | chr15 | 0.132038892 | - T2D risk | ExonBnd |
| cg26475005 | KIAA1217  | chr10 | 0.132054433 | + T2D risk | Body    |
| cg03417340 | WWP2      | chr16 | 0.132268135 | - T2D risk | Body    |
| cg10695700 | PACRG     | chr6  | 0.132277319 | - T2D risk | Body    |
| cg01370013 | PRKAG2    | chr7  | 0.132279152 | + T2D risk | Body    |
| cg21815882 | HNRNPA2B1 | chr7  | 0.132298817 | + T2D risk | TSS1500 |
| cg13612847 | GAD1      | chr2  | 0.132342809 | - T2D risk | TSS1500 |
| cg12513686 | DIP2C     | chr10 | 0.132523098 | + T2D risk | Body    |
| cg20028936 | ENAH      | chr1  | 0.132635129 | + T2D risk | Body    |
| cg01505016 | ATP2B1    | chr12 | 0.132700744 | - T2D risk | Body    |
| cg19451698 | RHBDD1    | chr2  | 0.132784676 | - T2D risk | TSS1500 |
| cg06920946 | DIP2C     | chr10 | 0.132910597 | - T2D risk | Body    |
| cg11361535 | LMX1B     | chr9  | 0.132940677 | + T2D risk | Body    |
| cg06217105 | TMEM131   | chr2  | 0.132972741 | - T2D risk | Body    |
| cg06764145 | MAN1A2    | chr1  | 0.13305206  | + T2D risk | Body    |
| cg20096490 | COL4A1    | chr13 | 0.133167705 | + T2D risk | Body    |
| cg09949353 | SH3GL2    | chr9  | 0.133231977 | + T2D risk | Body    |
| cg20340405 | PPFIBP1   | chr12 | 0.133235238 | - T2D risk | 3'UTR   |
| cg13522162 | CUL1      | chr7  | 0.133340056 | + T2D risk | 5'UTR   |
| cg23998048 | TENM2     | chr5  | 0.133382032 | + T2D risk | Body    |



|            |          |       |             |            |         |
|------------|----------|-------|-------------|------------|---------|
| cg02530350 | CNTNAP2  | chr7  | 0.133441832 | - T2D risk | Body    |
| cg16044777 | LAMA4    | chr6  | 0.133468433 | - T2D risk | Body    |
| cg11690539 | SLC29A4  | chr7  | 0.133491802 | + T2D risk | Body    |
| cg16284742 | CDH22    | chr20 | 0.133566828 | - T2D risk | TSS1500 |
| cg00121562 | PCYT1A   | chr3  | 0.133648233 | - T2D risk | 5'UTR   |
| cg15167311 | PRKD1    | chr14 | 0.133690687 | - T2D risk | Body    |
| cg07828413 | ENAH     | chr1  | 0.133769632 | - T2D risk | Body    |
| cg18899999 | PICALM   | chr11 | 0.133775816 | + T2D risk | Body    |
| cg16789241 | YWHAQ    | chr2  | 0.133801207 | - T2D risk | 5'UTR   |
| cg16789241 | YWHAQ    | chr2  | 0.133801207 | - T2D risk | 1stExon |
| cg06084515 | MYO6     | chr6  | 0.133988506 | - T2D risk | Body    |
| cg26368163 | ZHX2     | chr8  | 0.134116935 | + T2D risk | 5'UTR   |
| cg19012044 | NOTCH3   | chr19 | 0.134128443 | + T2D risk | Body    |
| cg10981514 | TPCN1    | chr12 | 0.134179567 | + T2D risk | Body    |
| cg13721404 | NOL4     | chr18 | 0.134208874 | - T2D risk | Body    |
| cg09744016 | ARL15    | chr5  | 0.134247085 | - T2D risk | 1stExon |
| cg09744016 | ARL15    | chr5  | 0.134247085 | - T2D risk | 5'UTR   |
| cg25723910 | DDHD2    | chr8  | 0.134251036 | + T2D risk | Body    |
| cg03826535 | TPCN1    | chr12 | 0.134267832 | - T2D risk | TSS200  |
| cg16793757 | ANK3     | chr10 | 0.13428583  | - T2D risk | Body    |
| cg15233530 | CHKA     | chr11 | 0.13445364  | + T2D risk | TSS1500 |
| cg26511507 | DIP2C    | chr10 | 0.134454939 | - T2D risk | Body    |
| cg26529778 | NOL4     | chr18 | 0.134514181 | - T2D risk | Body    |
| cg01550215 | PACS2    | chr14 | 0.134517795 | - T2D risk | Body    |
| cg19079653 | ZDHHC2   | chr8  | 0.134614972 | + T2D risk | TSS1500 |
| cg07964527 | PDE8A    | chr15 | 0.134622971 | + T2D risk | Body    |
| cg02091185 | RANBP17  | chr5  | 0.134688137 | - T2D risk | TSS1500 |
| cg04806237 | DIP2C    | chr10 | 0.13475369  | + T2D risk | Body    |
| cg07075061 | COL4A1   | chr13 | 0.134812112 | + T2D risk | 3'UTR   |
| cg04653052 | ATRNL1   | chr10 | 0.134899794 | + T2D risk | Body    |
| cg16374471 | PRKACB   | chr1  | 0.134906968 | - T2D risk | 5'UTR   |
| cg16374471 | PRKACB   | chr1  | 0.134906968 | - T2D risk | 1stExon |
| cg05746092 | ANK3     | chr10 | 0.134938314 | - T2D risk | Body    |
| cg27129219 | PRKCB    | chr16 | 0.135020056 | - T2D risk | Body    |
| cg09622146 | ATXN1    | chr6  | 0.135029356 | - T2D risk | 5'UTR   |
| cg14024823 | APBA1    | chr9  | 0.135040154 | - T2D risk | Body    |
| cg01409593 | DIP2C    | chr10 | 0.135072878 | - T2D risk | Body    |
| cg05180412 | ROBO2    | chr3  | 0.135107216 | + T2D risk | 5'UTR   |
| cg05180412 | ROBO2    | chr3  | 0.135107216 | + T2D risk | TSS1500 |
| cg05180412 | ROBO2    | chr3  | 0.135107216 | + T2D risk | Body    |
| cg09869286 | DIP2C    | chr10 | 0.135122841 | + T2D risk | Body    |
| cg06230805 | AGPAT3   | chr21 | 0.135131291 | + T2D risk | Body    |
| cg24260500 | SCAF11   | chr12 | 0.135134885 | + T2D risk | Body    |
| cg08650639 | GRK5     | chr10 | 0.13531787  | + T2D risk | Body    |
| cg14253333 | CDH22    | chr20 | 0.135333339 | + T2D risk | Body    |
| cg15701713 | RGS7     | chr1  | 0.135373013 | - T2D risk | Body    |
| cg26120109 | PTPRU    | chr1  | 0.135665582 | + T2D risk | Body    |
| cg10165167 | SLIT3    | chr5  | 0.135764793 | + T2D risk | TSS1500 |
| cg20146348 | TSHZ1    | chr18 | 0.135766464 | + T2D risk | 5'UTR   |
| cg20146348 | TSHZ1    | chr18 | 0.135766464 | + T2D risk | Body    |
| cg02128191 | DIP2C    | chr10 | 0.135784494 | - T2D risk | Body    |
| cg03569616 | NPAT     | chr11 | 0.135849969 | - T2D risk | Body    |
| cg21685565 | GNA12    | chr7  | 0.136126365 | - T2D risk | 1stExon |
| cg19367193 | PRKAG2   | chr7  | 0.136141652 | - T2D risk | 3'UTR   |
| cg02297941 | NCOA7    | chr6  | 0.136280742 | - T2D risk | 5'UTR   |
| cg09947615 | ATP8A1   | chr4  | 0.136399854 | - T2D risk | TSS1500 |
| cg21651000 | NCOA2    | chr8  | 0.136500801 | + T2D risk | 5'UTR   |
| cg19190274 | RAP1GAP2 | chr17 | 0.136644296 | + T2D risk | 3'UTR   |
| cg06752313 | APBA1    | chr9  | 0.13668734  | - T2D risk | ExonBnd |
| cg06752313 | APBA1    | chr9  | 0.13668734  | - T2D risk | Body    |
| cg04523320 | UBE2K    | chr4  | 0.136715016 | - T2D risk | Body    |
| cg15026574 | ST6GAL1  | chr3  | 0.136924548 | + T2D risk | 5'UTR   |
| cg23548616 | CNTNAP2  | chr7  | 0.136937891 | - T2D risk | Body    |
| cg17293868 | DIP2C    | chr10 | 0.137009944 | - T2D risk | Body    |
| cg22451117 | PRKD1    | chr14 | 0.137098787 | - T2D risk | Body    |
| cg12766793 | CUL1     | chr7  | 0.137117204 | - T2D risk | 5'UTR   |
| cg16147002 | TPCN1    | chr12 | 0.137157998 | + T2D risk | 5'UTR   |
| cg16147002 | TPCN1    | chr12 | 0.137157998 | + T2D risk | Body    |
| cg00759456 | RHBDD1   | chr2  | 0.137174439 | - T2D risk | Body    |
| cg25329939 | RAP2A    | chr13 | 0.137194883 | + T2D risk | TSS1500 |



|                |                 |       |             |            |         |
|----------------|-----------------|-------|-------------|------------|---------|
| cg09919124     | <i>FBXO11</i>   | chr2  | 0.137213449 | - T2D risk | Body    |
| cg05336292     | <i>DIP2C</i>    | chr10 | 0.137239185 | + T2D risk | Body    |
| cg17205466     | <i>SCARB2</i>   | chr4  | 0.137254467 | + T2D risk | Body    |
| cg24831711     | <i>ATXN1</i>    | chr6  | 0.137317356 | + T2D risk | 5'UTR   |
| cg11930955     | <i>TPCN1</i>    | chr12 | 0.137370534 | - T2D risk | 5'UTR   |
| cg07632790     | <i>DDHD2</i>    | chr8  | 0.137463147 | - T2D risk | Body    |
| cg18062356     | <i>ACSS2</i>    | chr20 | 0.137500336 | - T2D risk | TSS1500 |
| cg22134256     | <i>NUP98</i>    | chr11 | 0.137534356 | + T2D risk | Body    |
| cg08274518     | <i>CLASP2</i>   | chr3  | 0.137641409 | - T2D risk | Body    |
| cg03484139     | <i>DIP2C</i>    | chr10 | 0.137651864 | + T2D risk | Body    |
| cg13105228     | <i>CADM1</i>    | chr11 | 0.137838631 | + T2D risk | Body    |
| cg11332701     | <i>STX6</i>     | chr1  | 0.137895195 | + T2D risk | Body    |
| cg05966045     | <i>UBL3</i>     | chr13 | 0.13790827  | + T2D risk | Body    |
| cg23865067     | <i>ARPP19</i>   | chr15 | 0.137953903 | - T2D risk | Body    |
| cg07285148     | <i>PRKAG2</i>   | chr7  | 0.13803713  | + T2D risk | Body    |
| cg20634125     | <i>ATXN1</i>    | chr6  | 0.138085966 | + T2D risk | 5'UTR   |
| cg18656725     | <i>ANK2</i>     | chr4  | 0.138132494 | - T2D risk | Body    |
| cg00041079     | <i>FAM160A1</i> | chr4  | 0.138168114 | - T2D risk | 5'UTR   |
| cg11815150     | <i>PPP1R12A</i> | chr12 | 0.138207163 | + T2D risk | Body    |
| cg10983878     | <i>PHF21A</i>   | chr11 | 0.1382651   | - T2D risk | Body    |
| cg06507062     | <i>SSBP2</i>    | chr5  | 0.138273934 | - T2D risk | TSS1500 |
| cg02464555     | <i>CUX1</i>     | chr7  | 0.138628279 | + T2D risk | Body    |
| cg01235000     | <i>CPLX2</i>    | chr5  | 0.1387246   | + T2D risk | Body    |
| cg01648005     | <i>MAN1A2</i>   | chr1  | 0.138813655 | - T2D risk | 1stExon |
| cg01648005     | <i>MAN1A2</i>   | chr1  | 0.138813655 | - T2D risk | 5'UTR   |
| cg05719405     | <i>MYO6</i>     | chr6  | 0.139087975 | - T2D risk | 5'UTR   |
| cg13072717     | <i>ST6GAL1</i>  | chr3  | 0.13920158  | - T2D risk | 5'UTR   |
| cg00832329     | <i>PACS2</i>    | chr14 | 0.139454005 | - T2D risk | Body    |
| cg23008352     | <i>COL4A1</i>   | chr13 | 0.139494103 | - T2D risk | Body    |
| cg08833308     | <i>FLT1</i>     | chr13 | 0.139514033 | - T2D risk | Body    |
| cg15704204     | <i>TENM2</i>    | chr5  | 0.139549883 | - T2D risk | Body    |
| cg02143544     | <i>SPOCK1</i>   | chr5  | 0.139727619 | - T2D risk | Body    |
| cg27241873     | <i>DNAH9</i>    | chr17 | 0.13973535  | - T2D risk | Body    |
| cg12448545     | <i>FBXO11</i>   | chr2  | 0.139788077 | - T2D risk | TSS1500 |
| cg15833596     | <i>PFKFB2</i>   | chr1  | 0.139884207 | - T2D risk | TSS200  |
| cg24444035     | <i>TENM2</i>    | chr5  | 0.139910132 | - T2D risk | Body    |
| cg18113823     | <i>TMEM150C</i> | chr4  | 0.14011558  | - T2D risk | Body    |
| cg10335659     | <i>TSGA10</i>   | chr2  | 0.14013966  | + T2D risk | 5'UTR   |
| cg03373301     | <i>HMBOX1</i>   | chr8  | 0.140147593 | + T2D risk | Body    |
| cg04689697     | <i>NCOR1</i>    | chr17 | 0.140282163 | + T2D risk | Body    |
| cg24566581     | <i>CHID1</i>    | chr11 | 0.140349169 | + T2D risk | Body    |
| cg05088052     | <i>LMX1B</i>    | chr9  | 0.14039291  | + T2D risk | Body    |
| cg08151651     | <i>COL4A1</i>   | chr13 | 0.14041563  | - T2D risk | Body    |
| cg10478329     | <i>PACRG</i>    | chr6  | 0.14043319  | - T2D risk | Body    |
| cg27197835     | <i>DIP2C</i>    | chr10 | 0.140444532 | - T2D risk | Body    |
| cg20827128     | <i>PHACTR1</i>  | chr6  | 0.140449315 | - T2D risk | Body    |
| cg12180070     | <i>SLIT3</i>    | chr5  | 0.140510053 | - T2D risk | Body    |
| cg05092017     | <i>RSF1</i>     | chr11 | 0.140690581 | - T2D risk | Body    |
| cg10141789     | <i>CUX1</i>     | chr7  | 0.140745113 | + T2D risk | Body    |
| cg06943141     | <i>KIAA1217</i> | chr10 | 0.140826579 | + T2D risk | Body    |
| cg15669692     | <i>CUX1</i>     | chr7  | 0.141031663 | - T2D risk | Body    |
| cg00989765     | <i>KDR</i>      | chr4  | 0.141092304 | + T2D risk | TSS200  |
| cg14517752     | <i>PRKCE</i>    | chr2  | 0.141149265 | + T2D risk | Body    |
| cg22253553     | <i>FARSB</i>    | chr2  | 0.141163851 | - T2D risk | TSS1500 |
| cg02950491     | <i>ITPKB</i>    | chr1  | 0.14117187  | + T2D risk | Body    |
| cg06979550     | <i>CCNB1</i>    | chr5  | 0.141189122 | - T2D risk | TSS1500 |
| cg07917842     | <i>NF1</i>      | chr17 | 0.141235888 | - T2D risk | Body    |
| ch.11.1684505R | <i>RSF1</i>     | chr11 | 0.141243197 | - T2D risk | Body    |
| cg18864334     | <i>PACRG</i>    | chr6  | 0.141266164 | - T2D risk | Body    |
| cg21384462     | <i>ERC2</i>     | chr3  | 0.141310012 | + T2D risk | TSS1500 |
| cg06840305     | <i>TMEM131</i>  | chr2  | 0.141391157 | - T2D risk | Body    |
| cg04736490     | <i>PACS1</i>    | chr11 | 0.141405659 | - T2D risk | Body    |
| cg17084390     | <i>ATP8A1</i>   | chr4  | 0.14148153  | + T2D risk | Body    |
| cg06764795     | <i>CLOCK</i>    | chr4  | 0.141512991 | + T2D risk | 5'UTR   |
| cg22685913     | <i>PRKCB</i>    | chr16 | 0.141790137 | - T2D risk | Body    |
| cg04628308     | <i>PICALM</i>   | chr11 | 0.141807648 | - T2D risk | TSS200  |
| cg04628308     | <i>PICALM</i>   | chr11 | 0.141807648 | - T2D risk | 5'UTR   |
| cg24595041     | <i>YWHAQ</i>    | chr2  | 0.141813667 | + T2D risk | Body    |
| cg12790758     | <i>MEIS2</i>    | chr15 | 0.141877138 | - T2D risk | Body    |
| cg24716536     | <i>TBC1D5</i>   | chr3  | 0.14195838  | - T2D risk | 5'UTR   |



|            |           |       |             |            |         |
|------------|-----------|-------|-------------|------------|---------|
| cg01310482 | CUX1      | chr7  | 0.142004269 | - T2D risk | Body    |
| cg12114602 | CLEC16A   | chr16 | 0.142033725 | + T2D risk | Body    |
| cg03301424 | IFT74     | chr9  | 0.142048473 | + T2D risk | 5'UTR   |
| cg03301424 | IFT74     | chr9  | 0.142048473 | + T2D risk | TSS1500 |
| cg19471965 | KREMEN1   | chr22 | 0.142137103 | - T2D risk | Body    |
| cg01624414 | SCARB2    | chr4  | 0.142192751 | - T2D risk | Body    |
| cg05781582 | WWP2      | chr16 | 0.142198239 | + T2D risk | Body    |
| cg17679246 | PDK1      | chr2  | 0.142261238 | + T2D risk | TSS1500 |
| cg22947679 | MAN1A2    | chr1  | 0.142290099 | + T2D risk | TSS1500 |
| cg04131721 | GRK5      | chr10 | 0.142318504 | + T2D risk | Body    |
| cg11907102 | NDUFB3    | chr2  | 0.142319919 | + T2D risk | 5'UTR   |
| cg11907102 | NDUFB3    | chr2  | 0.142319919 | + T2D risk | 1stExon |
| cg20467565 | PRMT3     | chr11 | 0.142327912 | - T2D risk | TSS1500 |
| cg16977411 | FLT1      | chr13 | 0.142329124 | + T2D risk | Body    |
| cg07523442 | PACRG     | chr6  | 0.142569391 | - T2D risk | Body    |
| cg24982934 | HNRNPA2B1 | chr7  | 0.142770021 | + T2D risk | 3'UTR   |
| cg26479721 | KCNJ12    | chr17 | 0.142919623 | + T2D risk | 5'UTR   |
| cg26479721 | KCNJ18    | chr17 | 0.142919623 | + T2D risk | 5'UTR   |
| cg26479721 | KCNJ18    | chr17 | 0.142919623 | + T2D risk | 1stExon |
| cg13308744 | EIF1AY    | chrY  | 0.143198898 | - T2D risk | TSS1500 |
| cg05569018 | COL4A1    | chr13 | 0.143447309 | - T2D risk | Body    |
| cg22120094 | ZHX2      | chr8  | 0.14351189  | - T2D risk | 5'UTR   |
| cg09508632 | NCOA2     | chr8  | 0.143534915 | + T2D risk | 5'UTR   |
| cg25998794 | PACS2     | chr14 | 0.143700816 | - T2D risk | Body    |
| cg26116561 | DIP2C     | chr10 | 0.143729091 | + T2D risk | Body    |
| cg16846503 | CUX1      | chr7  | 0.14373966  | - T2D risk | Body    |
| cg08358803 | RANBP17   | chr5  | 0.143756045 | - T2D risk | TSS1500 |
| cg07944863 | RGS7      | chr1  | 0.143771537 | - T2D risk | TSS1500 |
| cg13464274 | SRPK2     | chr7  | 0.143792383 | - T2D risk | Body    |
| cg13464274 | SRPK2     | chr7  | 0.143792383 | - T2D risk | TSS1500 |
| cg15986307 | GNA12     | chr7  | 0.14380241  | - T2D risk | Body    |
| cg14005240 | ATP4A     | chr19 | 0.143825405 | - T2D risk | TSS1500 |
| cg12384004 | ATP8A2    | chr13 | 0.143980289 | + T2D risk | Body    |
| cg08555556 | PACRG     | chr6  | 0.144029092 | - T2D risk | Body    |
| cg17984508 | CHFR      | chr12 | 0.144053255 | - T2D risk | Body    |
| cg24827405 | KDM4B     | chr19 | 0.144176345 | + T2D risk | Body    |
| cg06444730 | PRKACB    | chr1  | 0.144193533 | - T2D risk | Body    |
| cg17409247 | PRKAG2    | chr7  | 0.144240658 | - T2D risk | Body    |
| cg09269891 | CREBBP    | chr16 | 0.144294264 | - T2D risk | Body    |
| cg02075820 | NUCB2     | chr11 | 0.144402007 | - T2D risk | 5'UTR   |
| cg04040631 | GRK5      | chr10 | 0.144432777 | + T2D risk | Body    |
| cg02613926 | CLOCK     | chr4  | 0.144493635 | - T2D risk | 5'UTR   |
| cg00683922 | PFKFB2    | chr1  | 0.144602823 | + T2D risk | Body    |
| cg13173809 | SKAP1     | chr17 | 0.144750369 | - T2D risk | Body    |
| cg14541915 | PACS1     | chr11 | 0.144762884 | - T2D risk | Body    |
| cg19159759 | CRYL1     | chr13 | 0.144827074 | + T2D risk | Body    |
| cg10238675 | CUX2      | chr12 | 0.144839692 | - T2D risk | Body    |
| cg00209424 | RTN4      | chr2  | 0.144949598 | + T2D risk | TSS200  |
| cg13036397 | CLEC16A   | chr16 | 0.144966608 | + T2D risk | Body    |
| cg11282531 | MEIS2     | chr15 | 0.145034379 | + T2D risk | TSS200  |
| cg11282531 | MEIS2     | chr15 | 0.145034379 | + T2D risk | TSS1500 |
| cg02169185 | CUX1      | chr7  | 0.145059159 | + T2D risk | Body    |
| cg19504234 | KCNJ12    | chr17 | 0.145094392 | + T2D risk | 5'UTR   |
| cg14331614 | KIAA1109  | chr4  | 0.145123007 | - T2D risk | Body    |
| cg06216309 | CUX1      | chr7  | 0.145133296 | - T2D risk | Body    |
| cg09456438 | POLA1     | chrX  | 0.145141186 | - T2D risk | Body    |
| cg07357683 | SEMA3G    | chr3  | 0.145311558 | + T2D risk | TSS1500 |
| cg20022216 | UBE2K     | chr4  | 0.145340138 | - T2D risk | Body    |
| cg07290796 | SPAG9     | chr17 | 0.145341938 | + T2D risk | Body    |
| cg19434164 | CUX1      | chr7  | 0.145372487 | + T2D risk | Body    |
| cg25109719 | PACS2     | chr14 | 0.14538529  | + T2D risk | Body    |
| cg24844313 | ITPKB     | chr1  | 0.145429891 | + T2D risk | 5'UTR   |
| cg07962812 | SMG7      | chr1  | 0.145449129 | - T2D risk | TSS200  |
| cg02915968 | CUX1      | chr7  | 0.145468008 | - T2D risk | Body    |
| cg10093358 | DIP2C     | chr10 | 0.145590915 | + T2D risk | Body    |
| cg23137807 | MEIS2     | chr15 | 0.145675707 | - T2D risk | TSS200  |
| cg23137807 | MEIS2     | chr15 | 0.145675707 | - T2D risk | TSS1500 |
| cg23955881 | KCNJ12    | chr17 | 0.145802001 | + T2D risk | 5'UTR   |
| cg06425848 | PACS2     | chr14 | 0.145814817 | - T2D risk | Body    |
| cg20389760 | ATP8A1    | chr4  | 0.145924907 | - T2D risk | TSS1500 |



|            |          |       |             |            |         |
|------------|----------|-------|-------------|------------|---------|
| cg13586599 | SCGN     | chr6  | 0.146019127 | - T2D risk | TSS200  |
| cg18636829 | CUX1     | chr7  | 0.1461042   | + T2D risk | Body    |
| cg02649098 | ADCY5    | chr3  | 0.146231453 | + T2D risk | Body    |
| cg27648808 | SLIT3    | chr5  | 0.146349276 | - T2D risk | Body    |
| cg14583183 | CDH22    | chr20 | 0.146374698 | + T2D risk | Body    |
| cg22222104 | UNC80    | chr2  | 0.146421505 | - T2D risk | Body    |
| cg23378706 | SSBP2    | chr5  | 0.146509908 | - T2D risk | TSS1500 |
| cg03746015 | CLEC16A  | chr16 | 0.146540758 | - T2D risk | Body    |
| cg02774087 | INPP4A   | chr2  | 0.146611644 | + T2D risk | Body    |
| cg11707631 | CLEC16A  | chr16 | 0.146705369 | + T2D risk | Body    |
| cg16595458 | CNTNAP2  | chr7  | 0.146707977 | - T2D risk | Body    |
| cg21922478 | ITGA1    | chr5  | 0.146708444 | - T2D risk | Body    |
| cg18767547 | SCAF8    | chr6  | 0.146921747 | - T2D risk | Body    |
| cg02559239 | ANKHD1   | chr5  | 0.146928921 | - T2D risk | Body    |
| cg08324896 | TTC28    | chr22 | 0.146992905 | + T2D risk | Body    |
| cg01700344 | PRKAG2   | chr7  | 0.147039491 | + T2D risk | Body    |
| cg01538165 | NCOA2    | chr8  | 0.147126403 | - T2D risk | 5'UTR   |
| cg24020698 | DIP2C    | chr10 | 0.147139931 | + T2D risk | Body    |
| cg12120701 | EIF4EBP3 | chr5  | 0.147157243 | + T2D risk | TSS1500 |
| cg18804645 | RGS7     | chr1  | 0.147307908 | - T2D risk | Body    |
| cg13811532 | PRKCB    | chr16 | 0.147462404 | - T2D risk | Body    |
| cg09936566 | NUF2     | chr1  | 0.147516922 | + T2D risk | 5'UTR   |
| cg07133994 | PRKD1    | chr14 | 0.147568937 | + T2D risk | Body    |
| cg10517370 | JPH2     | chr20 | 0.147581448 | + T2D risk | Body    |
| cg19001667 | APBA1    | chr9  | 0.14762858  | - T2D risk | Body    |
| cg11865772 | ANK3     | chr10 | 0.147658615 | - T2D risk | TSS1500 |
| cg11865772 | ANK3     | chr10 | 0.147658615 | - T2D risk | Body    |
| cg19202288 | PACRG    | chr6  | 0.147663494 | - T2D risk | Body    |
| cg03075494 | TSHZ1    | chr18 | 0.147672547 | + T2D risk | 5'UTR   |
| cg03075494 | TSHZ1    | chr18 | 0.147672547 | + T2D risk | 1stExon |
| cg22306632 | KIAA0232 | chr4  | 0.147767055 | + T2D risk | Body    |
| cg07615875 | CUX1     | chr7  | 0.147846332 | + T2D risk | Body    |
| cg10789486 | DACH1    | chr13 | 0.147858804 | - T2D risk | Body    |
| cg00584457 | DDC      | chr7  | 0.147893186 | - T2D risk | Body    |
| cg09807191 | LMX1B    | chr9  | 0.147895152 | + T2D risk | Body    |
| cg13138391 | DIP2C    | chr10 | 0.147907808 | - T2D risk | Body    |
| cg13648715 | SCARB2   | chr4  | 0.147945031 | + T2D risk | Body    |
| cg10905699 | RSF1     | chr11 | 0.147983367 | - T2D risk | 1stExon |
| cg14896357 | FAM160A1 | chr4  | 0.14803723  | + T2D risk | TSS1500 |
| cg07059630 | ARL8B    | chr3  | 0.148038761 | - T2D risk | Body    |
| cg11914079 | TSHZ1    | chr18 | 0.148049897 | + T2D risk | TSS1500 |
| cg09090899 | TMEM219  | chr16 | 0.148209608 | + T2D risk | 5'UTR   |
| cg12290394 | GALK2    | chr15 | 0.148333227 | - T2D risk | Body    |
| cg07018367 | RANBP17  | chr5  | 0.148373256 | + T2D risk | Body    |
| cg06081153 | SRPK2    | chr7  | 0.148426432 | - T2D risk | TSS200  |
| cg07371373 | ENAH     | chr1  | 0.148575033 | - T2D risk | Body    |
| cg00243880 | CUX1     | chr7  | 0.148619909 | + T2D risk | Body    |
| cg09980118 | GNA12    | chr7  | 0.148667393 | + T2D risk | Body    |
| cg09980118 | GNA12    | chr7  | 0.148667393 | + T2D risk | TSS1500 |
| cg16490209 | BCAT1    | chr12 | 0.148752771 | - T2D risk | Body    |
| cg19717773 | GNA12    | chr7  | 0.148814496 | - T2D risk | Body    |
| cg16404047 | NOTCH3   | chr19 | 0.148861558 | + T2D risk | Body    |
| cg25333826 | RTN4     | chr2  | 0.148873544 | + T2D risk | Body    |
| cg25333826 | RTN4     | chr2  | 0.148873544 | + T2D risk | 5'UTR   |
| cg07117394 | ATRNL1   | chr10 | 0.14906536  | - T2D risk | Body    |
| cg01269617 | CUX2     | chr12 | 0.149128163 | - T2D risk | Body    |
| cg20792919 | PDE7A    | chr8  | 0.149192158 | - T2D risk | Body    |
| cg01289552 | RET      | chr10 | 0.149274316 | - T2D risk | TSS1500 |
| cg03204600 | ARHGEF9  | chrX  | 0.149276728 | - T2D risk | TSS1500 |
| cg10459548 | CUX2     | chr12 | 0.149341799 | - T2D risk | Body    |
| cg13347071 | UNC80    | chr2  | 0.149459772 | - T2D risk | 5'UTR   |
| cg13347071 | UNC80    | chr2  | 0.149459772 | - T2D risk | 1stExon |
| cg16788234 | NPAT     | chr11 | 0.149503941 | + T2D risk | 1stExon |
| cg16788234 | NPAT     | chr11 | 0.149503941 | + T2D risk | 5'UTR   |
| cg13788829 | RET      | chr10 | 0.149667073 | + T2D risk | Body    |
| cg08327920 | IFT74    | chr9  | 0.14968974  | + T2D risk | TSS1500 |
| cg00178149 | WDR48    | chr3  | 0.149895299 | + T2D risk | TSS200  |
| cg06373726 | FARSB    | chr2  | 0.149991405 | - T2D risk | Body    |
| cg17761410 | CUL1     | chr7  | 0.150052286 | - T2D risk | Body    |
| cg12974607 | ASB9     | chrX  | 0.150186284 | - T2D risk | 3'UTR   |



|            |          |       |             |            |         |
|------------|----------|-------|-------------|------------|---------|
| cg12974607 | ASB9     | chrX  | 0.150186284 | - T2D risk | Body    |
| cg16860350 | SEZ6L    | chr22 | 0.150303391 | + T2D risk | Body    |
| cg08388140 | FLT1     | chr13 | 0.150310592 | + T2D risk | Body    |
| cg08817965 | TOP2A    | chr17 | 0.150371273 | + T2D risk | TSS200  |
| cg21540848 | CDK8     | chr13 | 0.150387494 | - T2D risk | TSS1500 |
| cg15029192 | GALK2    | chr15 | 0.150402827 | - T2D risk | TSS1500 |
| cg10563213 | TENM2    | chr5  | 0.15041367  | + T2D risk | Body    |
| cg00748375 | ATP8A2   | chr13 | 0.150556814 | - T2D risk | Body    |
| cg24809378 | DIP2C    | chr10 | 0.150828853 | + T2D risk | Body    |
| cg10413151 | CLEC16A  | chr16 | 0.150913752 | - T2D risk | Body    |
| cg21264443 | NGF      | chr1  | 0.150943606 | + T2D risk | Body    |
| cg21842778 | ITPKB    | chr1  | 0.150959771 | + T2D risk | Body    |
| cg18898251 | TSGA10   | chr2  | 0.150992987 | - T2D risk | 5'UTR   |
| cg26262197 | CADM1    | chr11 | 0.150998599 | - T2D risk | Body    |
| cg15463900 | DACH1    | chr13 | 0.151048629 | - T2D risk | Body    |
| cg00939947 | RBM4     | chr11 | 0.151086131 | - T2D risk | TSS200  |
| cg01890333 | ULK4     | chr3  | 0.151087299 | + T2D risk | Body    |
| cg17792419 | ANK3     | chr10 | 0.15114892  | - T2D risk | TSS1500 |
| cg17792419 | ANK3     | chr10 | 0.15114892  | - T2D risk | Body    |
| cg23275463 | NPAT     | chr11 | 0.151171482 | - T2D risk | Body    |
| cg26600614 | CALD1    | chr7  | 0.151244244 | - T2D risk | 5'UTR   |
| cg19391535 | CUL1     | chr7  | 0.151246602 | - T2D risk | 5'UTR   |
| cg21333338 | RAP1GAP2 | chr17 | 0.151277603 | + T2D risk | Body    |
| cg21374672 | ATXN1    | chr6  | 0.15132169  | + T2D risk | Body    |
| cg00326908 | PDE7A    | chr8  | 0.151413187 | + T2D risk | TSS1500 |
| cg02514398 | DIP2C    | chr10 | 0.151420122 | + T2D risk | Body    |
| cg11352386 | ZRANB1   | chr10 | 0.151433754 | + T2D risk | Body    |
| cg11352386 | ZRANB1   | chr10 | 0.151433754 | + T2D risk | ExonBnd |
| cg17504655 | CLASP2   | chr3  | 0.151476441 | + T2D risk | 5'UTR   |
| cg17504655 | CLASP2   | chr3  | 0.151476441 | + T2D risk | 1stExon |
| cg24595440 | RAP1GAP2 | chr17 | 0.151694971 | + T2D risk | Body    |
| cg07989678 | DYNC1I2  | chr2  | 0.151722764 | + T2D risk | TSS1500 |
| cg19649083 | CPLX2    | chr5  | 0.151775747 | + T2D risk | 5'UTR   |
| cg17646571 | KIAA1217 | chr10 | 0.151834468 | + T2D risk | 5'UTR   |
| cg25076483 | NUP98    | chr11 | 0.151856985 | + T2D risk | Body    |
| cg16856100 | TBC1D5   | chr3  | 0.152036369 | - T2D risk | 5'UTR   |
| cg16856100 | TBC1D5   | chr3  | 0.152036369 | - T2D risk | TSS1500 |
| cg26232470 | CALD1    | chr7  | 0.152066884 | + T2D risk | Body    |
| cg21247398 | PRKAG2   | chr7  | 0.152093055 | + T2D risk | TSS1500 |
| cg17909019 | PRKCE    | chr2  | 0.152109413 | - T2D risk | Body    |
| cg03627261 | ARL15    | chr5  | 0.15227234  | - T2D risk | Body    |
| cg20547400 | CUX1     | chr7  | 0.152362132 | - T2D risk | Body    |
| cg25483907 | ULK4     | chr3  | 0.152698567 | - T2D risk | Body    |
| cg19784545 | ANK2     | chr4  | 0.152730592 | - T2D risk | Body    |
| cg05163475 | CNTROB   | chr17 | 0.152787445 | - T2D risk | TSS1500 |
| cg02404670 | KREMEN1  | chr22 | 0.152951849 | - T2D risk | Body    |
| cg02511809 | APC      | chr5  | 0.152990525 | + T2D risk | 5'UTR   |
| cg02511809 | APC      | chr5  | 0.152990525 | + T2D risk | TSS200  |
| cg12457040 | KCNIP3   | chr2  | 0.153037739 | + T2D risk | TSS200  |
| cg12457040 | KCNIP3   | chr2  | 0.153037739 | + T2D risk | Body    |
| cg07064056 | ANK3     | chr10 | 0.153046102 | - T2D risk | Body    |
| cg27586655 | SLIT3    | chr5  | 0.153174318 | + T2D risk | Body    |
| cg16188354 | DENND4C  | chr9  | 0.153311732 | - T2D risk | Body    |
| cg21743479 | KIAA1217 | chr10 | 0.15332963  | - T2D risk | TSS1500 |
| cg21743479 | KIAA1217 | chr10 | 0.15332963  | - T2D risk | Body    |
| cg03482521 | ZHX2     | chr8  | 0.1534294   | + T2D risk | 5'UTR   |
| cg23408372 | SLC9A6   | chrX  | 0.153538785 | - T2D risk | Body    |
| cg09800500 | BCAT1    | chr12 | 0.153614663 | - T2D risk | Body    |
| cg02437119 | KIAA0232 | chr4  | 0.153622001 | + T2D risk | 5'UTR   |
| cg09961254 | DIP2C    | chr10 | 0.153676202 | + T2D risk | Body    |
| cg19324204 | SGSM2    | chr17 | 0.153693331 | - T2D risk | Body    |
| cg26544530 | FLT1     | chr13 | 0.153893731 | + T2D risk | Body    |
| cg24864097 | GRK5     | chr10 | 0.153911242 | + T2D risk | Body    |
| cg16618226 | CLASP2   | chr3  | 0.153919623 | + T2D risk | Body    |
| cg16618226 | CLASP2   | chr3  | 0.153919623 | + T2D risk | TSS200  |
| cg15081062 | OXSM     | chr3  | 0.154020733 | - T2D risk | Body    |
| cg15081062 | NGLY1    | chr3  | 0.154020733 | - T2D risk | TSS1500 |
| cg09981964 | CNTNAP2  | chr7  | 0.154122983 | - T2D risk | Body    |
| cg05432959 | RAP2A    | chr13 | 0.154222555 | - T2D risk | Body    |
| cg03418552 | CADM1    | chr11 | 0.154237203 | + T2D risk | TSS200  |



|            |           |       |             |            |         |
|------------|-----------|-------|-------------|------------|---------|
| cg12601476 | ANK3      | chr10 | 0.15424267  | - T2D risk | Body    |
| cg16504278 | CLEC16A   | chr16 | 0.154258822 | - T2D risk | Body    |
| cg10748874 | ANK3      | chr10 | 0.154369919 | - T2D risk | Body    |
| cg00151370 | ATXN1     | chr6  | 0.154473958 | + T2D risk | Body    |
| cg02354872 | GLG1      | chr16 | 0.154479741 | + T2D risk | Body    |
| cg17497320 | ENAH      | chr1  | 0.154579382 | - T2D risk | Body    |
| cg09320924 | SSBP2     | chr5  | 0.154651816 | + T2D risk | Body    |
| cg18026190 | AMD1      | chr6  | 0.15470183  | - T2D risk | 5'UTR   |
| cg18026190 | AMD1      | chr6  | 0.15470183  | - T2D risk | Body    |
| cg06138703 | CNTROB    | chr17 | 0.154712714 | + T2D risk | Body    |
| cg14010696 | KDM4B     | chr19 | 0.154737481 | - T2D risk | Body    |
| cg07295964 | CPLX2     | chr5  | 0.154756494 | + T2D risk | 5'UTR   |
| cg02643440 | GRK5      | chr10 | 0.154782535 | - T2D risk | Body    |
| cg21848407 | TANC2     | chr17 | 0.154861882 | + T2D risk | Body    |
| cg15665812 | GRK5      | chr10 | 0.154946734 | - T2D risk | Body    |
| cg06061092 | DIP2C     | chr10 | 0.154972375 | + T2D risk | Body    |
| cg17146950 | EFR3A     | chr8  | 0.15502934  | - T2D risk | TSS1500 |
| cg16835843 | AGPAT3    | chr21 | 0.155034505 | + T2D risk | 5'UTR   |
| cg07659663 | CHID1     | chr11 | 0.155154621 | + T2D risk | 5'UTR   |
| cg15043683 | GLG1      | chr16 | 0.155285527 | - T2D risk | TSS200  |
| cg03846704 | CLEC16A   | chr16 | 0.155381073 | + T2D risk | Body    |
| cg22814879 | ST20      | chr15 | 0.155482336 | - T2D risk | Body    |
| cg20699102 | PRKCE     | chr2  | 0.155486124 | + T2D risk | Body    |
| cg27505805 | JPH2      | chr20 | 0.155508696 | + T2D risk | TSS1500 |
| cg03684893 | DIP2C     | chr10 | 0.155585148 | - T2D risk | Body    |
| cg17922432 | DNAJC1    | chr10 | 0.155639664 | - T2D risk | Body    |
| cg18470442 | SLC30A8   | chr8  | 0.155683482 | + T2D risk | 5'UTR   |
| cg20184887 | NCOR1     | chr17 | 0.15572372  | + T2D risk | 5'UTR   |
| cg01523767 | ZHX2      | chr8  | 0.155840363 | + T2D risk | 5'UTR   |
| cg01027929 | HNRNPA2B1 | chr7  | 0.155971922 | + T2D risk | TSS1500 |
| cg12029753 | ERC2      | chr3  | 0.155986033 | + T2D risk | 3'UTR   |
| cg05798523 | IMPA1     | chr8  | 0.156089325 | - T2D risk | 5'UTR   |
| cg05798523 | IMPA1     | chr8  | 0.156089325 | - T2D risk | 1stExon |
| cg18576318 | CHKA      | chr11 | 0.156135474 | - T2D risk | TSS200  |
| cg13239572 | WIZ       | chr19 | 0.156152267 | - T2D risk | TSS200  |
| cg01252455 | CPLX2     | chr5  | 0.15625877  | + T2D risk | 5'UTR   |
| cg10813296 | PPFIBP1   | chr12 | 0.156297208 | + T2D risk | TSS1500 |
| cg08816290 | CRYL1     | chr13 | 0.156538945 | + T2D risk | Body    |
| cg21544091 | GRK5      | chr10 | 0.156588689 | + T2D risk | Body    |
| cg16419087 | AMD1      | chr6  | 0.15662466  | + T2D risk | TSS1500 |
| cg19052193 | TPCN1     | chr12 | 0.156688328 | - T2D risk | 5'UTR   |
| cg15095482 | TANC2     | chr17 | 0.156777068 | + T2D risk | Body    |
| cg24332422 | APC       | chr5  | 0.156785424 | + T2D risk | 5'UTR   |
| cg07190246 | MYO6      | chr6  | 0.156846237 | - T2D risk | Body    |
| cg13589942 | ERC2      | chr3  | 0.156912838 | + T2D risk | Body    |
| cg20597640 | CLASP2    | chr3  | 0.156962083 | + T2D risk | Body    |
| cg04010712 | ULK4      | chr3  | 0.157242958 | + T2D risk | 5'UTR   |
| cg20611343 | SLIT3     | chr5  | 0.157314115 | + T2D risk | Body    |
| cg12901078 | ANK2      | chr4  | 0.157354962 | + T2D risk | Body    |
| cg02911489 | GNA12     | chr7  | 0.157590542 | - T2D risk | Body    |
| cg07242609 | CLEC16A   | chr16 | 0.157617421 | - T2D risk | Body    |
| cg08127539 | TBC1D5    | chr3  | 0.157683508 | + T2D risk | Body    |
| cg00868847 | PDE7A     | chr8  | 0.157801451 | + T2D risk | TSS1500 |
| cg16639342 | GRK5      | chr10 | 0.157876702 | + T2D risk | Body    |
| cg10071852 | DIP2C     | chr10 | 0.157900352 | + T2D risk | Body    |
| cg06311596 | CTR9      | chr11 | 0.157926844 | - T2D risk | Body    |
| cg27368891 | TMEM150C  | chr4  | 0.157978879 | - T2D risk | 5'UTR   |
| cg24381100 | GLG1      | chr16 | 0.158119312 | + T2D risk | Body    |
| cg24381100 | GLG1      | chr16 | 0.158119312 | + T2D risk | ExonBnd |
| cg17640486 | ZHX2      | chr8  | 0.158333212 | + T2D risk | 5'UTR   |
| cg00334362 | PHACTR1   | chr6  | 0.158339668 | - T2D risk | Body    |
| cg08665859 | WDR48     | chr3  | 0.158354086 | - T2D risk | TSS1500 |
| cg15534647 | CMTR1     | chr6  | 0.158407963 | - T2D risk | ExonBnd |
| cg15534647 | CMTR1     | chr6  | 0.158407963 | - T2D risk | Body    |
| cg24949750 | ASH1L     | chr1  | 0.158458861 | - T2D risk | TSS1500 |
| cg22389528 | SSBP2     | chr5  | 0.158487683 | - T2D risk | Body    |
| cg22551357 | SSBP2     | chr5  | 0.158636443 | + T2D risk | Body    |
| cg03987837 | SGSM2     | chr17 | 0.158642086 | - T2D risk | Body    |
| cg01728951 | SKAP1     | chr17 | 0.158713161 | + T2D risk | Body    |
| cg05591513 | SRPK2     | chr7  | 0.158724725 | + T2D risk | Body    |



|            |          |       |             |            |         |
|------------|----------|-------|-------------|------------|---------|
| cg23479586 | ARPP19   | chr15 | 0.158737317 | + T2D risk | Body    |
| cg23446277 | ITPKB    | chr1  | 0.158787036 | - T2D risk | Body    |
| cg05266796 | ATXN1    | chr6  | 0.158790164 | + T2D risk | 5'UTR   |
| cg24069962 | PRKCE    | chr2  | 0.15880203  | + T2D risk | Body    |
| cg19234894 | COL4A1   | chr13 | 0.158899524 | - T2D risk | Body    |
| cg06102153 | MGRN1    | chr16 | 0.15894946  | - T2D risk | 1stExon |
| cg06102153 | MGRN1    | chr16 | 0.15894946  | - T2D risk | 5'UTR   |
| cg26387072 | CUX1     | chr7  | 0.158964389 | - T2D risk | Body    |
| cg10728746 | DDHD2    | chr8  | 0.159018103 | + T2D risk | Body    |
| cg19713175 | CHKA     | chr11 | 0.159132838 | - T2D risk | TSS200  |
| cg11331769 | TAZ      | chrX  | 0.159237272 | + T2D risk | TSS1500 |
| cg06588466 | UBL3     | chr13 | 0.159256005 | + T2D risk | 3'UTR   |
| cg12534150 | APC      | chr5  | 0.159418178 | + T2D risk | 1stExon |
| cg12534150 | APC      | chr5  | 0.159418178 | + T2D risk | 5'UTR   |
| cg11282705 | PRKAG2   | chr7  | 0.159526588 | + T2D risk | Body    |
| cg00561610 | SEMA3G   | chr3  | 0.159587514 | + T2D risk | TSS1500 |
| cg19420645 | KDR      | chr4  | 0.159675679 | - T2D risk | Body    |
| cg27382860 | PRKAG2   | chr7  | 0.159782647 | + T2D risk | Body    |
| cg22607409 | NGF      | chr1  | 0.159943303 | + T2D risk | 5'UTR   |
| cg22693772 | MAST1    | chr19 | 0.159961329 | - T2D risk | Body    |
| cg03346378 | TBC1D5   | chr3  | 0.159968316 | + T2D risk | Body    |
| cg25697242 | TBC1D5   | chr3  | 0.160063085 | - T2D risk | Body    |
| cg13697735 | PLEKHG3  | chr14 | 0.160200863 | - T2D risk | 5'UTR   |
| cg09256836 | FBXO11   | chr2  | 0.160302172 | - T2D risk | Body    |
| cg14842970 | NOL4     | chr18 | 0.160326057 | + T2D risk | Body    |
| cg05306109 | ITPKB    | chr1  | 0.160328285 | + T2D risk | Body    |
| cg15464763 | CUL1     | chr7  | 0.160425699 | - T2D risk | 3'UTR   |
| cg23178772 | ATXN1    | chr6  | 0.160455288 | + T2D risk | 5'UTR   |
| cg17334080 | CUX1     | chr7  | 0.160561253 | - T2D risk | Body    |
| cg05637308 | NPAT     | chr11 | 0.160598632 | - T2D risk | Body    |
| cg06035200 | ZHX2     | chr8  | 0.160635667 | - T2D risk | 5'UTR   |
| cg02382666 | CALD1    | chr7  | 0.160765783 | + T2D risk | TSS1500 |
| cg09346738 | CLIC5    | chr6  | 0.160786239 | - T2D risk | Body    |
| cg06594255 | CTR9     | chr11 | 0.160995854 | - T2D risk | Body    |
| cg27255456 | ACSS2    | chr20 | 0.161069776 | - T2D risk | Body    |
| cg14614917 | ERC2     | chr3  | 0.161166587 | + T2D risk | Body    |
| cg15531497 | FBXO11   | chr2  | 0.161326075 | - T2D risk | TSS1500 |
| cg05508833 | ARHGAP32 | chr11 | 0.161328559 | - T2D risk | Body    |
| cg04069089 | SLIT3    | chr5  | 0.161367935 | + T2D risk | Body    |
| cg22588640 | KCNIP3   | chr2  | 0.161602315 | - T2D risk | 5'UTR   |
| cg22588640 | KCNIP3   | chr2  | 0.161602315 | - T2D risk | 1stExon |
| cg24438749 | COL4A1   | chr13 | 0.161635898 | + T2D risk | Body    |
| cg23210514 | KIAA0355 | chr19 | 0.161730423 | - T2D risk | 5'UTR   |
| cg04768557 | ANK3     | chr10 | 0.161811521 | - T2D risk | Body    |
| cg00856737 | WDR48    | chr3  | 0.161849203 | - T2D risk | Body    |
| cg15574263 | CHID1    | chr11 | 0.161899344 | + T2D risk | TSS1500 |
| cg15574263 | CHID1    | chr11 | 0.161899344 | + T2D risk | 5'UTR   |
| cg14572805 | TBC1D5   | chr3  | 0.161923391 | + T2D risk | Body    |
| cg15346619 | DIP2C    | chr10 | 0.162067122 | - T2D risk | Body    |
| cg19997218 | ACTN4    | chr19 | 0.162074439 | + T2D risk | Body    |
| cg03843335 | LMCD1    | chr3  | 0.162140559 | - T2D risk | 5'UTR   |
| cg03843335 | LMCD1    | chr3  | 0.162140559 | - T2D risk | Body    |
| cg05766539 | ERC2     | chr3  | 0.1622122   | - T2D risk | 3'UTR   |
| cg20503117 | ARL8B    | chr3  | 0.162341751 | + T2D risk | 5'UTR   |
| cg20503117 | ARL8B    | chr3  | 0.162341751 | + T2D risk | 1stExon |
| cg08744842 | CLEC16A  | chr16 | 0.162364227 | + T2D risk | Body    |
| cg26827328 | CDH22    | chr20 | 0.162454833 | - T2D risk | Body    |
| cg13394717 | DIP2C    | chr10 | 0.162720033 | + T2D risk | Body    |
| cg26001950 | YWHAQ    | chr2  | 0.162726561 | + T2D risk | Body    |
| cg00977063 | ATP8A2   | chr13 | 0.162816251 | + T2D risk | Body    |
| cg27237420 | PACS2    | chr14 | 0.16288386  | + T2D risk | Body    |
| cg02578162 | CREBBP   | chr16 | 0.162965122 | + T2D risk | Body    |
| cg13710027 | WIZ      | chr19 | 0.162973313 | + T2D risk | Body    |
| cg06758255 | TOX3     | chr16 | 0.16297652  | - T2D risk | Body    |
| cg05881528 | ZRANB1   | chr10 | 0.163026857 | - T2D risk | Body    |
| cg08715207 | EIF1AY   | chrY  | 0.163069554 | + T2D risk | Body    |
| cg04465474 | KCNJ12   | chr17 | 0.163231119 | + T2D risk | 5'UTR   |
| cg02518760 | NOL4     | chr18 | 0.163233966 | + T2D risk | Body    |
| cg03639488 | SPOCK1   | chr5  | 0.163245559 | - T2D risk | TSS1500 |
| cg20294481 | ATRN     | chr20 | 0.163247274 | + T2D risk | Body    |



|            |                  |       |             |            |         |
|------------|------------------|-------|-------------|------------|---------|
| cg22378065 | <i>PLAGL1</i>    | chr6  | 0.163283795 | + T2D risk | 5'UTR   |
| cg14135174 | <i>DNAH9</i>     | chr17 | 0.163418655 | - T2D risk | 5'UTR   |
| cg14135174 | <i>DNAH9</i>     | chr17 | 0.163418655 | - T2D risk | Body    |
| cg19088859 | <i>TMEM59</i>    | chr1  | 0.163426255 | - T2D risk | TSS200  |
| cg05724532 | <i>WIZ</i>       | chr19 | 0.163505151 | - T2D risk | Body    |
| cg21424270 | <i>CLASP2</i>    | chr3  | 0.163505785 | - T2D risk | Body    |
| cg21424270 | <i>CLASP2</i>    | chr3  | 0.163505785 | - T2D risk | TSS200  |
| cg04432493 | <i>MET</i>       | chr7  | 0.163799432 | + T2D risk | 5'UTR   |
| cg15313339 | <i>PDLIM5</i>    | chr4  | 0.1638719   | - T2D risk | 5'UTR   |
| cg15313339 | <i>PDLIM5</i>    | chr4  | 0.1638719   | - T2D risk | Body    |
| cg08353054 | <i>CCNB1</i>     | chr5  | 0.163886147 | - T2D risk | Body    |
| cg24537231 | <i>SNX4</i>      | chr3  | 0.164036299 | - T2D risk | TSS200  |
| cg00951422 | <i>NOTCH3</i>    | chr19 | 0.164057868 | - T2D risk | TSS200  |
| cg09874796 | <i>DIP2C</i>     | chr10 | 0.164102681 | - T2D risk | Body    |
| cg00147126 | <i>TJP1</i>      | chr15 | 0.164134499 | - T2D risk | TSS200  |
| cg00147126 | <i>TJP1</i>      | chr15 | 0.164134499 | - T2D risk | Body    |
| cg09434738 | <i>DIP2C</i>     | chr10 | 0.164429974 | + T2D risk | Body    |
| cg21096468 | <i>APC</i>       | chr5  | 0.16467096  | - T2D risk | Body    |
| cg18723276 | <i>USP29</i>     | chr19 | 0.164698168 | - T2D risk | TSS1500 |
| cg01583866 | <i>TMEM219</i>   | chr16 | 0.164788116 | + T2D risk | 3'UTR   |
| cg00366722 | <i>MEIS2</i>     | chr15 | 0.164855557 | - T2D risk | TSS200  |
| cg00366722 | <i>MEIS2</i>     | chr15 | 0.164855557 | - T2D risk | TSS1500 |
| cg16647164 | <i>CLIC5</i>     | chr6  | 0.164904278 | - T2D risk | TSS1500 |
| cg16647164 | <i>CLIC5</i>     | chr6  | 0.164904278 | - T2D risk | Body    |
| cg16970232 | <i>APC</i>       | chr5  | 0.164926774 | + T2D risk | 5'UTR   |
| cg16970232 | <i>APC</i>       | chr5  | 0.164926774 | + T2D risk | TSS200  |
| cg02207200 | <i>SLC7A2</i>    | chr8  | 0.165011639 | - T2D risk | TSS1500 |
| cg14648916 | <i>CPLX2</i>     | chr5  | 0.165046023 | - T2D risk | 5'UTR   |
| cg06008844 | <i>ANK3</i>      | chr10 | 0.165221176 | - T2D risk | Body    |
| cg23921304 | <i>PICALM</i>    | chr11 | 0.165267517 | + T2D risk | Body    |
| cg06899186 | <i>CUL1</i>      | chr7  | 0.165367622 | - T2D risk | TSS1500 |
| cg21068871 | <i>FBXL2</i>     | chr3  | 0.165523279 | - T2D risk | Body    |
| cg00584602 | <i>WDR47</i>     | chr1  | 0.165539636 | - T2D risk | 5'UTR   |
| cg02691005 | <i>PDE3A</i>     | chr12 | 0.165597271 | + T2D risk | Body    |
| cg23117592 | <i>UNC80</i>     | chr2  | 0.165611446 | + T2D risk | Body    |
| cg25841625 | <i>SCARB2</i>    | chr4  | 0.165644025 | - T2D risk | Body    |
| cg01211801 | <i>ROBO2</i>     | chr3  | 0.165748358 | + T2D risk | Body    |
| cg20277616 | <i>NF1</i>       | chr17 | 0.165751774 | + T2D risk | 3'UTR   |
| cg24645635 | <i>MYO6</i>      | chr6  | 0.16587792  | + T2D risk | 5'UTR   |
| cg04953935 | <i>ERC2</i>      | chr3  | 0.165979704 | - T2D risk | Body    |
| cg01823172 | <i>PLAGL1</i>    | chr6  | 0.16615901  | + T2D risk | 5'UTR   |
| cg06998038 | <i>PLEKHG3</i>   | chr14 | 0.166175878 | + T2D risk | Body    |
| cg12647142 | <i>HNRNPA2B1</i> | chr7  | 0.166378118 | - T2D risk | TSS1500 |
| cg05648614 | <i>ARL8B</i>     | chr3  | 0.166396888 | + T2D risk | Body    |
| cg22862116 | <i>ROBO2</i>     | chr3  | 0.166515732 | + T2D risk | 5'UTR   |
| cg22862116 | <i>ROBO2</i>     | chr3  | 0.166515732 | + T2D risk | Body    |
| cg01669247 | <i>SEC31A</i>    | chr4  | 0.16655445  | - T2D risk | ExonBnd |
| cg01669247 | <i>SEC31A</i>    | chr4  | 0.16655445  | - T2D risk | Body    |
| cg26025358 | <i>ATP8A1</i>    | chr4  | 0.166610663 | - T2D risk | Body    |
| cg13443720 | <i>SRPK2</i>     | chr7  | 0.166628118 | - T2D risk | TSS200  |
| cg13443720 | <i>SRPK2</i>     | chr7  | 0.166628118 | - T2D risk | Body    |
| cg15177103 | <i>TMEM131</i>   | chr2  | 0.166640112 | + T2D risk | Body    |
| cg05115314 | <i>AGPAT3</i>    | chr21 | 0.166656399 | + T2D risk | 5'UTR   |
| cg22497575 | <i>TSC22D1</i>   | chr13 | 0.166822782 | - T2D risk | Body    |
| cg25788857 | <i>WWP2</i>      | chr16 | 0.166828248 | - T2D risk | TSS200  |
| cg25788857 | <i>WWP2</i>      | chr16 | 0.166828248 | - T2D risk | Body    |
| cg26832820 | <i>TMEM131</i>   | chr2  | 0.166875609 | - T2D risk | Body    |
| cg06398242 | <i>PRKCE</i>     | chr2  | 0.166895054 | + T2D risk | Body    |
| cg11382248 | <i>RAP1GAP2</i>  | chr17 | 0.167052648 | - T2D risk | Body    |
| cg26917828 | <i>ITPKB</i>     | chr1  | 0.167057404 | + T2D risk | Body    |
| cg17504742 | <i>TTC28</i>     | chr22 | 0.167108411 | + T2D risk | Body    |
| cg03075156 | <i>PRKCE</i>     | chr2  | 0.16714282  | + T2D risk | Body    |
| cg17311927 | <i>NF1</i>       | chr17 | 0.167157266 | - T2D risk | TSS1500 |
| cg12475686 | <i>ANK3</i>      | chr10 | 0.16720729  | + T2D risk | Body    |
| cg18827345 | <i>CHKA</i>      | chr11 | 0.167219768 | + T2D risk | Body    |
| cg01211627 | <i>ERC2</i>      | chr3  | 0.167247778 | - T2D risk | Body    |
| cg11747820 | <i>PTPRU</i>     | chr1  | 0.167275101 | - T2D risk | Body    |
| cg24327955 | <i>ATRN</i>      | chr20 | 0.167314802 | + T2D risk | Body    |
| cg04980297 | <i>MDM1</i>      | chr12 | 0.167361543 | - T2D risk | Body    |
| cg10921916 | <i>PRKCB</i>     | chr16 | 0.167400369 | + T2D risk | Body    |



|            |                 |       |             |            |         |
|------------|-----------------|-------|-------------|------------|---------|
| cg02839273 | <i>PDE8A</i>    | chr15 | 0.167433528 | + T2D risk | 5'UTR   |
| cg02839273 | <i>PDE8A</i>    | chr15 | 0.167433528 | + T2D risk | 1stExon |
| cg25447269 | <i>EFCAB14</i>  | chr1  | 0.167618762 | - T2D risk | Body    |
| cg06023646 | <i>WDR48</i>    | chr3  | 0.167661651 | - T2D risk | 1stExon |
| cg01516459 | <i>PHACTR1</i>  | chr6  | 0.167688276 | + T2D risk | Body    |
| cg13441429 | <i>CCNB1</i>    | chr5  | 0.167746498 | - T2D risk | TSS1500 |
| cg00456685 | <i>FBXL2</i>    | chr3  | 0.16783736  | - T2D risk | Body    |
| cg06379340 | <i>UNC80</i>    | chr2  | 0.167889283 | - T2D risk | 3'UTR   |
| cg00961127 | <i>DIP2C</i>    | chr10 | 0.167980297 | + T2D risk | Body    |
| cg12712074 | <i>NF1</i>      | chr17 | 0.167986864 | - T2D risk | Body    |
| cg18372600 | <i>KIAA1217</i> | chr10 | 0.167990968 | - T2D risk | 3'UTR   |
| cg13865402 | <i>PPP1R12A</i> | chr12 | 0.167992931 | + T2D risk | Body    |
| cg06955189 | <i>ERC2</i>     | chr3  | 0.168073709 | + T2D risk | Body    |
| cg24990275 | <i>TBC1D5</i>   | chr3  | 0.168196056 | - T2D risk | Body    |
| cg10740902 | <i>KDR</i>      | chr4  | 0.168281785 | - T2D risk | 1stExon |
| cg10740902 | <i>KDR</i>      | chr4  | 0.168281785 | - T2D risk | 5'UTR   |
| cg16949378 | <i>SGSM2</i>    | chr17 | 0.168303637 | + T2D risk | Body    |
| cg26244472 | <i>FNIP2</i>    | chr4  | 0.168306818 | + T2D risk | TSS1500 |
| cg22305257 | <i>SLIT3</i>    | chr5  | 0.168351399 | - T2D risk | 1stExon |
| cg22305257 | <i>SLIT3</i>    | chr5  | 0.168351399 | - T2D risk | 5'UTR   |
| cg23502275 | <i>ANK2</i>     | chr4  | 0.16846156  | - T2D risk | 5'UTR   |
| cg05116088 | <i>ATP6V1H</i>  | chr8  | 0.168718539 | + T2D risk | Body    |
| cg19932792 | <i>DYNC111</i>  | chr7  | 0.168721039 | - T2D risk | TSS200  |
| cg16736863 | <i>GLG1</i>     | chr16 | 0.168724429 | - T2D risk | 3'UTR   |
| cg16736863 | <i>GLG1</i>     | chr16 | 0.168724429 | - T2D risk | Body    |
| cg24762861 | <i>TTC28</i>    | chr22 | 0.168777061 | - T2D risk | Body    |
| cg14300048 | <i>APBA1</i>    | chr9  | 0.168803295 | + T2D risk | 3'UTR   |
| cg01230796 | <i>SCGN</i>     | chr6  | 0.168846664 | - T2D risk | 1stExon |
| cg07223626 | <i>STX6</i>     | chr1  | 0.168856272 | - T2D risk | Body    |
| cg13338685 | <i>PACRG</i>    | chr6  | 0.16886838  | - T2D risk | Body    |
| cg16934595 | <i>RTN4</i>     | chr2  | 0.168977849 | + T2D risk | Body    |
| cg04349438 | <i>TTC28</i>    | chr22 | 0.169258434 | - T2D risk | Body    |
| cg13303328 | <i>DIP2C</i>    | chr10 | 0.169390286 | + T2D risk | Body    |
| cg23935746 | <i>CCNB1</i>    | chr5  | 0.169457569 | + T2D risk | 1stExon |
| cg23935746 | <i>CCNB1</i>    | chr5  | 0.169457569 | + T2D risk | 5'UTR   |
| cg03716590 | <i>DYNC111</i>  | chr7  | 0.16951343  | - T2D risk | Body    |
| cg23401684 | <i>YWHAQ</i>    | chr2  | 0.169521882 | - T2D risk | TSS1500 |
| cg12313215 | <i>ARIH1</i>    | chr15 | 0.169534364 | - T2D risk | Body    |
| cg06688642 | <i>DNAJC1</i>   | chr10 | 0.169608409 | - T2D risk | Body    |
| cg27222667 | <i>TSC2D1</i>   | chr13 | 0.169633457 | - T2D risk | Body    |
| cg18967371 | <i>CMTR1</i>    | chr6  | 0.169679229 | - T2D risk | 5'UTR   |
| cg03323793 | <i>PRKAG2</i>   | chr7  | 0.169726292 | + T2D risk | Body    |
| cg17459557 | <i>NCOA7</i>    | chr6  | 0.169767195 | - T2D risk | Body    |
| cg18394062 | <i>SLC29A4</i>  | chr7  | 0.169833181 | + T2D risk | Body    |
| cg04286425 | <i>TTC28</i>    | chr22 | 0.169861055 | - T2D risk | Body    |
| cg12034963 | <i>SPAG9</i>    | chr17 | 0.169898883 | + T2D risk | Body    |
| cg12034963 | <i>SPAG9</i>    | chr17 | 0.169898883 | + T2D risk | TSS1500 |
| cg05066075 | <i>RHOA</i>     | chr3  | 0.169908141 | + T2D risk | 5'UTR   |
| cg19685106 | <i>ANK2</i>     | chr4  | 0.169927683 | - T2D risk | TSS1500 |
| cg16220788 | <i>PHF21A</i>   | chr11 | 0.16993128  | + T2D risk | Body    |
| cg06862080 | <i>ITPKB</i>    | chr1  | 0.169949111 | + T2D risk | Body    |
| cg01299932 | <i>ATXN1</i>    | chr6  | 0.1701547   | - T2D risk | 5'UTR   |
| cg01287200 | <i>CDK8</i>     | chr13 | 0.170209561 | + T2D risk | Body    |
| cg06058828 | <i>PHF21A</i>   | chr11 | 0.170230345 | - T2D risk | Body    |
| cg11670802 | <i>DIP2C</i>    | chr10 | 0.170243016 | + T2D risk | Body    |
| cg10430155 | <i>CMTR1</i>    | chr6  | 0.170251596 | - T2D risk | Body    |
| cg05443740 | <i>KCNIP3</i>   | chr2  | 0.170364951 | + T2D risk | TSS200  |
| cg24313217 | <i>SEC31A</i>   | chr4  | 0.170415669 | + T2D risk | Body    |
| cg04355432 | <i>SLC30A8</i>  | chr8  | 0.170510653 | - T2D risk | 5'UTR   |
| cg17240934 | <i>DIP2C</i>    | chr10 | 0.170579736 | - T2D risk | Body    |
| cg26924544 | <i>PHACTR1</i>  | chr6  | 0.170613185 | - T2D risk | Body    |
| cg19258565 | <i>PACRG</i>    | chr6  | 0.17068319  | - T2D risk | Body    |
| cg04001714 | <i>KCNIP3</i>   | chr2  | 0.170828871 | + T2D risk | Body    |
| cg25123083 | <i>PACS1</i>    | chr11 | 0.170876951 | + T2D risk | Body    |
| cg01669517 | <i>ATXN1</i>    | chr6  | 0.171041712 | + T2D risk | Body    |
| cg00422643 | <i>PRKACB</i>   | chr1  | 0.171076875 | - T2D risk | Body    |
| cg09565111 | <i>ATP8A2</i>   | chr13 | 0.171109589 | + T2D risk | Body    |
| cg26031947 | <i>AMD1</i>     | chr6  | 0.171328122 | - T2D risk | 5'UTR   |
| cg15942950 | <i>ASH1L</i>    | chr1  | 0.171350365 | + T2D risk | Body    |
| cg10814190 | <i>TSGA10</i>   | chr2  | 0.171388955 | + T2D risk | TSS1500 |



|            |          |       |             |            |         |
|------------|----------|-------|-------------|------------|---------|
| cg10814190 | TSGA10   | chr2  | 0.171388955 | + T2D risk | 5'UTR   |
| cg08660379 | NCOR1    | chr17 | 0.171486505 | - T2D risk | Body    |
| cg06831761 | SRPK2    | chr7  | 0.171491609 | - T2D risk | Body    |
| cg22005389 | PHACTR1  | chr6  | 0.171628568 | - T2D risk | Body    |
| cg11427848 | PDLIM5   | chr4  | 0.171656843 | - T2D risk | 5'UTR   |
| cg11427848 | PDLIM5   | chr4  | 0.171656843 | - T2D risk | Body    |
| cg05314271 | HMBX1    | chr8  | 0.171778349 | + T2D risk | TSS1500 |
| cg20628344 | RHOA     | chr3  | 0.171821116 | + T2D risk | TSS1500 |
| cg01656421 | NOL4     | chr18 | 0.171827675 | - T2D risk | 5'UTR   |
| cg01656421 | NOL4     | chr18 | 0.171827675 | - T2D risk | Body    |
| cg01656421 | NOL4     | chr18 | 0.171827675 | - T2D risk | 1stExon |
| cg13336350 | TSHZ1    | chr18 | 0.171888866 | + T2D risk | 5'UTR   |
| cg13336350 | TSHZ1    | chr18 | 0.171888866 | + T2D risk | Body    |
| cg15751214 | PHACTR1  | chr6  | 0.171946948 | - T2D risk | Body    |
| cg23144846 | PRKCE    | chr2  | 0.171991692 | - T2D risk | Body    |
| cg13660126 | DIP2C    | chr10 | 0.172007015 | - T2D risk | Body    |
| cg01716016 | CUX1     | chr7  | 0.172013405 | + T2D risk | Body    |
| cg14042137 | LMX1B    | chr9  | 0.172046413 | - T2D risk | Body    |
| cg12184994 | DIP2C    | chr10 | 0.172075099 | + T2D risk | Body    |
| cg02896073 | NOL4     | chr18 | 0.172076344 | + T2D risk | Body    |
| cg01767396 | ATP8A2   | chr13 | 0.172119255 | - T2D risk | Body    |
| cg14449571 | FARSB    | chr2  | 0.172185294 | - T2D risk | TSS200  |
| cg11597887 | PRKD1    | chr14 | 0.172321349 | - T2D risk | Body    |
| cg14453327 | SRPK2    | chr7  | 0.172391561 | - T2D risk | Body    |
| cg25520488 | TANC2    | chr17 | 0.172419924 | - T2D risk | Body    |
| cg16915506 | ANK3     | chr10 | 0.17242835  | + T2D risk | TSS1500 |
| cg16915506 | ANK3     | chr10 | 0.17242835  | + T2D risk | Body    |
| cg05608281 | GRK5     | chr10 | 0.172480645 | - T2D risk | Body    |
| cg13921196 | MYO6     | chr6  | 0.172516798 | - T2D risk | Body    |
| cg07486170 | CLEC16A  | chr16 | 0.172676098 | - T2D risk | Body    |
| cg05530566 | SCAF8    | chr6  | 0.172681717 | + T2D risk | Body    |
| cg03891849 | KCNIP3   | chr2  | 0.172694454 | - T2D risk | TSS200  |
| cg11230968 | SKAP1    | chr17 | 0.172717336 | - T2D risk | Body    |
| cg09402611 | ARL15    | chr5  | 0.172742064 | + T2D risk | Body    |
| cg12147606 | SLIT3    | chr5  | 0.172748284 | + T2D risk | Body    |
| cg09191173 | NPAT     | chr11 | 0.172827019 | - T2D risk | Body    |
| cg20652759 | DIP2C    | chr10 | 0.172893283 | + T2D risk | Body    |
| cg04615850 | KDM4B    | chr19 | 0.172926588 | + T2D risk | Body    |
| cg09229912 | CUX2     | chr12 | 0.172962026 | - T2D risk | 1stExon |
| cg09229912 | CUX2     | chr12 | 0.172962026 | - T2D risk | 5'UTR   |
| cg07073096 | GNA12    | chr7  | 0.172999069 | + T2D risk | Body    |
| cg25887684 | RBM4     | chr11 | 0.173003845 | - T2D risk | Body    |
| cg06933370 | MEIS2    | chr15 | 0.173098656 | - T2D risk | Body    |
| cg05932517 | RAP1GAP2 | chr17 | 0.173155572 | - T2D risk | Body    |
| cg26580895 | SKAP1    | chr17 | 0.173201901 | + T2D risk | TSS200  |
| cg14928941 | ATXN1    | chr6  | 0.173243621 | + T2D risk | 5'UTR   |
| cg23828876 | PCYT1A   | chr3  | 0.173245924 | - T2D risk | 5'UTR   |
| cg05664105 | GRK5     | chr10 | 0.173274337 | + T2D risk | Body    |
| cg01665880 | NCOA7    | chr6  | 0.173342694 | - T2D risk | 5'UTR   |
| cg00797500 | PACRG    | chr6  | 0.173522512 | + T2D risk | Body    |
| cg07488073 | ARIH1    | chr15 | 0.173524601 | - T2D risk | TSS1500 |
| cg04055053 | DIP2C    | chr10 | 0.173537545 | + T2D risk | Body    |
| cg02762892 | SLC29A4  | chr7  | 0.173702544 | + T2D risk | Body    |
| cg11425149 | CALD1    | chr7  | 0.173778882 | - T2D risk | TSS1500 |
| cg03770437 | KDM4B    | chr19 | 0.173897906 | + T2D risk | 5'UTR   |
| cg08575682 | CUL1     | chr7  | 0.174008156 | + T2D risk | Body    |
| cg02046187 | GLG1     | chr16 | 0.17403511  | + T2D risk | Body    |
| cg19843411 | PHF21A   | chr11 | 0.174122765 | + T2D risk | 5'UTR   |
| cg19843411 | PHF21A   | chr11 | 0.174122765 | + T2D risk | 1stExon |
| cg01625418 | CDK8     | chr13 | 0.174278353 | + T2D risk | Body    |
| cg19958057 | MET      | chr7  | 0.174417229 | + T2D risk | 1stExon |
| cg19958057 | MET      | chr7  | 0.174417229 | + T2D risk | 5'UTR   |
| cg15053022 | ATP4A    | chr19 | 0.174457124 | - T2D risk | Body    |
| cg11754846 | ST8SIA1  | chr12 | 0.174489699 | - T2D risk | TSS1500 |
| cg25007384 | KDM4B    | chr19 | 0.174522246 | + T2D risk | 5'UTR   |
| cg01089319 | GAD1     | chr2  | 0.174639354 | - T2D risk | Body    |
| cg01445459 | SH3GL2   | chr9  | 0.174701627 | + T2D risk | Body    |
| cg16856431 | PDE5A    | chr4  | 0.174734488 | + T2D risk | Body    |
| cg16856431 | PDE5A    | chr4  | 0.174734488 | + T2D risk | TSS200  |
| cg16856431 | PDE5A    | chr4  | 0.174734488 | + T2D risk | TSS1500 |



|            |           |       |             |            |         |
|------------|-----------|-------|-------------|------------|---------|
| cg19547929 | NOTCH3    | chr19 | 0.174862109 | + T2D risk | TSS1500 |
| cg17055252 | PRKCE     | chr2  | 0.175023308 | + T2D risk | Body    |
| cg23135138 | KREMEN1   | chr22 | 0.175087923 | + T2D risk | Body    |
| cg12848345 | CADM1     | chr11 | 0.175144643 | + T2D risk | Body    |
| cg10501128 | FLT1      | chr13 | 0.17539195  | - T2D risk | 5'UTR   |
| cg10501128 | FLT1      | chr13 | 0.17539195  | - T2D risk | 1stExon |
| cg02248826 | TJP1      | chr15 | 0.175437638 | + T2D risk | TSS1500 |
| cg22529607 | PDE8A     | chr15 | 0.175439334 | + T2D risk | Body    |
| cg00315816 | PRKAG2    | chr7  | 0.175553531 | - T2D risk | 5'UTR   |
| cg00315816 | PRKAG2    | chr7  | 0.175553531 | - T2D risk | Body    |
| cg04975376 | ATXN1     | chr6  | 0.175598187 | - T2D risk | TSS1500 |
| cg19852344 | CHFR      | chr12 | 0.175787268 | - T2D risk | 5'UTR   |
| cg02036943 | PLEKHG3   | chr14 | 0.17583865  | - T2D risk | TSS200  |
| cg04885799 | SRPK2     | chr7  | 0.175861474 | + T2D risk | Body    |
| cg26159934 | SRPK2     | chr7  | 0.176006232 | - T2D risk | TSS200  |
| cg05356782 | PACS1     | chr11 | 0.176063574 | + T2D risk | Body    |
| cg20988215 | TMEM131   | chr2  | 0.176301814 | - T2D risk | Body    |
| cg01419499 | EFR3A     | chr8  | 0.176417245 | + T2D risk | Body    |
| cg00174179 | RHOA      | chr3  | 0.176457227 | - T2D risk | TSS1500 |
| cg15500907 | LAMA4     | chr6  | 0.176547726 | - T2D risk | Body    |
| cg27634682 | TAB2      | chr6  | 0.176691801 | + T2D risk | Body    |
| cg06676271 | SCAF11    | chr12 | 0.176704858 | - T2D risk | Body    |
| cg23780110 | ASXL2     | chr2  | 0.176733271 | - T2D risk | Body    |
| cg02381687 | PHACTR1   | chr6  | 0.176870249 | + T2D risk | Body    |
| cg24951593 | NUP98     | chr11 | 0.176889747 | - T2D risk | 5'UTR   |
| cg18194110 | DIP2C     | chr10 | 0.176910919 | + T2D risk | Body    |
| cg15125476 | HMBOX1    | chr8  | 0.176950548 | + T2D risk | Body    |
| cg07874507 | KIAA1217  | chr10 | 0.176979533 | - T2D risk | 5'UTR   |
| cg07874507 | KIAA1217  | chr10 | 0.176979533 | - T2D risk | Body    |
| cg00146225 | RGS7      | chr1  | 0.177038251 | - T2D risk | Body    |
| cg05161529 | NF1       | chr17 | 0.177058887 | - T2D risk | 3'UTR   |
| cg03547487 | HNRNPA2B1 | chr7  | 0.177171654 | + T2D risk | TSS200  |
| cg08577213 | RSF1      | chr11 | 0.177208693 | - T2D risk | Body    |
| cg15430743 | NOL4      | chr18 | 0.177213823 | - T2D risk | Body    |
| cg10775173 | PRKAG2    | chr7  | 0.177216696 | - T2D risk | Body    |
| cg20584926 | SLIT3     | chr5  | 0.177287361 | - T2D risk | Body    |
| cg00780578 | FAM155B   | chrX  | 0.177428953 | - T2D risk | Body    |
| cg09900084 | MAN1A2    | chr1  | 0.177456877 | + T2D risk | Body    |
| cg02784956 | CLASP2    | chr3  | 0.17764008  | + T2D risk | Body    |
| cg26035031 | SCAF11    | chr12 | 0.177640593 | - T2D risk | Body    |
| cg06478943 | PDE8A     | chr15 | 0.177668654 | + T2D risk | Body    |
| cg00263307 | NF1       | chr17 | 0.177712683 | + T2D risk | Body    |
| cg19533147 | CALD1     | chr7  | 0.177886932 | + T2D risk | 5'UTR   |
| cg08598454 | BCAT1     | chr12 | 0.17791576  | + T2D risk | Body    |
| cg08598454 | BCAT1     | chr12 | 0.17791576  | + T2D risk | TSS200  |
| cg08598454 | BCAT1     | chr12 | 0.17791576  | + T2D risk | TSS1500 |
| cg17690975 | MYO6      | chr6  | 0.177928556 | - T2D risk | Body    |
| cg25937056 | ADCY5     | chr3  | 0.177947211 | + T2D risk | Body    |
| cg25937056 | ADCY5     | chr3  | 0.177947211 | + T2D risk | TSS1500 |
| cg25490301 | MMS19     | chr10 | 0.178125328 | + T2D risk | Body    |
| cg05412222 | PACS2     | chr14 | 0.178138008 | + T2D risk | Body    |
| cg11166823 | AGPAT3    | chr21 | 0.178180305 | - T2D risk | TSS1500 |
| cg22913462 | ADCY5     | chr3  | 0.178198291 | - T2D risk | Body    |
| cg22913462 | ADCY5     | chr3  | 0.178198291 | - T2D risk | TSS1500 |
| cg24743283 | GNA12     | chr7  | 0.178231121 | + T2D risk | TSS1500 |
| cg23019039 | ARL15     | chr5  | 0.178271245 | + T2D risk | Body    |
| cg12469633 | KREMEN1   | chr22 | 0.178396553 | - T2D risk | Body    |
| cg04281649 | TMEM131   | chr2  | 0.178451721 | + T2D risk | TSS1500 |
| cg05819837 | CUX1      | chr7  | 0.178462935 | - T2D risk | Body    |
| cg06902844 | PICALM    | chr11 | 0.178624286 | + T2D risk | Body    |
| cg21870662 | SGSM2     | chr17 | 0.178660631 | - T2D risk | Body    |
| cg25384748 | INPP4A    | chr2  | 0.178685083 | - T2D risk | Body    |
| cg25320221 | SMG7      | chr1  | 0.178753014 | - T2D risk | TSS1500 |
| cg02681695 | CLEC16A   | chr16 | 0.178779035 | - T2D risk | Body    |
| cg03434384 | PPFIBP1   | chr12 | 0.178940181 | - T2D risk | 5'UTR   |
| cg12502012 | SLC30A8   | chr8  | 0.179010309 | + T2D risk | 5'UTR   |
| cg04737843 | ATXN1     | chr6  | 0.179075053 | + T2D risk | 5'UTR   |
| cg22370057 | PHACTR1   | chr6  | 0.179156144 | + T2D risk | Body    |
| cg11692369 | ATP6V1H   | chr8  | 0.179172047 | - T2D risk | TSS200  |
| cg11692369 | ATP6V1H   | chr8  | 0.179172047 | - T2D risk | TSS1500 |



|            |          |       |             |            |         |
|------------|----------|-------|-------------|------------|---------|
| cg21753973 | CPLX2    | chr5  | 0.179180823 | - T2D risk | 5'UTR   |
| cg16304493 | TTC28    | chr22 | 0.179241217 | - T2D risk | Body    |
| cg02013762 | CDH22    | chr20 | 0.179273758 | + T2D risk | Body    |
| cg10683641 | GLG1     | chr16 | 0.179311255 | - T2D risk | Body    |
| cg05046371 | GNA12    | chr7  | 0.17947273  | + T2D risk | 3'UTR   |
| cg02449091 | FAM160A1 | chr4  | 0.179658178 | - T2D risk | 5'UTR   |
| cg26571196 | PRKAG2   | chr7  | 0.179779097 | - T2D risk | 5'UTR   |
| cg26571196 | PRKAG2   | chr7  | 0.179779097 | - T2D risk | Body    |
| cg12485783 | SKAP1    | chr17 | 0.179779763 | + T2D risk | Body    |
| cg02666129 | SPOCK1   | chr5  | 0.179813928 | + T2D risk | Body    |
| cg22032364 | ATP8A2   | chr13 | 0.179873983 | + T2D risk | Body    |
| cg16364296 | ATXN1    | chr6  | 0.179963758 | + T2D risk | 5'UTR   |
| cg05256688 | WIZ      | chr19 | 0.179967806 | + T2D risk | Body    |
| cg03650840 | DYNC1I2  | chr2  | 0.180095147 | + T2D risk | 5'UTR   |
| cg03650840 | DYNC1I2  | chr2  | 0.180095147 | + T2D risk | TSS200  |
| cg03650840 | DYNC1I2  | chr2  | 0.180095147 | + T2D risk | 1stExon |
| cg21701823 | RNF217   | chr6  | 0.180241611 | + T2D risk | Body    |
| cg03943594 | DIP2C    | chr10 | 0.180253979 | - T2D risk | Body    |
| cg00288050 | MAST1    | chr19 | 0.180362872 | - T2D risk | Body    |
| cg23078782 | KREMEN1  | chr22 | 0.18036791  | + T2D risk | Body    |
| cg04245731 | NCOR1    | chr17 | 0.180371759 | + T2D risk | Body    |
| cg23930313 | BCAT1    | chr12 | 0.18042223  | + T2D risk | Body    |
| cg20745134 | RSF1     | chr11 | 0.180451294 | - T2D risk | TSS1500 |
| cg27081107 | DIP2C    | chr10 | 0.180455299 | + T2D risk | Body    |
| cg13744954 | WIZ      | chr19 | 0.180484901 | + T2D risk | Body    |
| cg18559471 | PPP1R12A | chr12 | 0.180551838 | - T2D risk | Body    |
| cg19765175 | DIP2C    | chr10 | 0.180601711 | + T2D risk | Body    |
| cg25457744 | MYO6     | chr6  | 0.180602956 | + T2D risk | Body    |
| cg19027571 | CHFR     | chr12 | 0.180729585 | - T2D risk | Body    |
| cg02775353 | CUX1     | chr7  | 0.180772967 | + T2D risk | Body    |
| cg00735398 | SKAP1    | chr17 | 0.180777497 | - T2D risk | Body    |
| cg03786933 | NQO1     | chr16 | 0.180790275 | - T2D risk | 5'UTR   |
| cg03786933 | NQO1     | chr16 | 0.180790275 | - T2D risk | 1stExon |
| cg17242812 | DIP2C    | chr10 | 0.180940463 | - T2D risk | Body    |
| cg16592301 | PRKD1    | chr14 | 0.180949473 | + T2D risk | Body    |
| cg17434943 | SEC31A   | chr4  | 0.180955448 | - T2D risk | TSS1500 |
| cg17217059 | FAM160A1 | chr4  | 0.181005827 | + T2D risk | TSS1500 |
| cg08841898 | PPFIBP1  | chr12 | 0.181046567 | - T2D risk | 5'UTR   |
| cg16037930 | SEZ6L    | chr22 | 0.181244704 | + T2D risk | Body    |
| cg01909588 | SLC29A4  | chr7  | 0.181281976 | + T2D risk | Body    |
| cg12411965 | INPP4A   | chr2  | 0.181419865 | - T2D risk | Body    |
| cg24082339 | TENM2    | chr5  | 0.181449664 | - T2D risk | Body    |
| cg18018034 | PLEKHG3  | chr14 | 0.181608956 | - T2D risk | 1stExon |
| cg18018034 | PLEKHG3  | chr14 | 0.181608956 | - T2D risk | 5'UTR   |
| cg16481013 | TJP1     | chr15 | 0.1816825   | - T2D risk | Body    |
| cg10921334 | MAN1A1   | chr6  | 0.181706678 | - T2D risk | Body    |
| cg13171934 | RAP1GAP2 | chr17 | 0.181770722 | + T2D risk | Body    |
| cg02654987 | USP53    | chr4  | 0.181927208 | - T2D risk | 5'UTR   |
| cg16925893 | USP53    | chr4  | 0.181986213 | - T2D risk | TSS1500 |
| cg26352143 | POLA1    | chrX  | 0.18202606  | + T2D risk | Body    |
| cg00049674 | ADCY5    | chr3  | 0.182028361 | + T2D risk | Body    |
| cg15600279 | DDC      | chr7  | 0.182083156 | + T2D risk | 3'UTR   |
| cg26356782 | PHACTR1  | chr6  | 0.182204055 | + T2D risk | Body    |
| cg12555895 | ARHGAP32 | chr11 | 0.182414492 | - T2D risk | 5'UTR   |
| cg12555895 | ARHGAP32 | chr11 | 0.182414492 | - T2D risk | Body    |
| cg12676680 | ZHX2     | chr8  | 0.182440395 | + T2D risk | 5'UTR   |
| cg20429277 | CUL1     | chr7  | 0.182450776 | - T2D risk | 5'UTR   |
| cg01130406 | ANK2     | chr4  | 0.182605748 | + T2D risk | 1stExon |
| cg01130406 | ANK2     | chr4  | 0.182605748 | + T2D risk | 5'UTR   |
| cg08272281 | ARID2    | chr12 | 0.182655216 | + T2D risk | Body    |
| cg14125707 | LMX1B    | chr9  | 0.182687415 | - T2D risk | Body    |
| cg08783695 | DIP2C    | chr10 | 0.182800782 | + T2D risk | Body    |
| cg13691737 | GRK5     | chr10 | 0.182873026 | - T2D risk | Body    |
| cg22534925 | SRPK2    | chr7  | 0.1828874   | + T2D risk | TSS1500 |
| cg01204939 | GALK2    | chr15 | 0.182888537 | + T2D risk | 5'UTR   |
| cg01204939 | GALK2    | chr15 | 0.182888537 | + T2D risk | Body    |
| cg13625881 | APC      | chr5  | 0.182894237 | + T2D risk | Body    |
| cg25413188 | ATP4A    | chr19 | 0.182919228 | + T2D risk | 5'UTR   |
| cg25413188 | ATP4A    | chr19 | 0.182919228 | + T2D risk | 1stExon |
| cg18201385 | UBL3     | chr13 | 0.182930182 | - T2D risk | Body    |



|            |         |       |             |            |         |
|------------|---------|-------|-------------|------------|---------|
| cg07537523 | BCAT1   | chr12 | 0.182960387 | + T2D risk | TSS200  |
| cg16925207 | TSHZ1   | chr18 | 0.182983938 | - T2D risk | 5'UTR   |
| cg16925207 | TSHZ1   | chr18 | 0.182983938 | - T2D risk | Body    |
| cg26284917 | PDK1    | chr2  | 0.183044496 | + T2D risk | TSS1500 |
| cg02793451 | TOX3    | chr16 | 0.183058332 | - T2D risk | TSS1500 |
| cg11429262 | ITGB1   | chr10 | 0.183107097 | + T2D risk | 5'UTR   |
| cg00179844 | TMEM131 | chr2  | 0.18317781  | + T2D risk | Body    |
| cg23992886 | MET     | chr7  | 0.183274011 | + T2D risk | Body    |
| cg10967532 | PACS2   | chr14 | 0.183305883 | - T2D risk | Body    |
| cg03815879 | SEZ6L   | chr22 | 0.183331682 | - T2D risk | Body    |
| cg18089847 | CUX2    | chr12 | 0.183358209 | - T2D risk | Body    |
| cg26154135 | UXS1    | chr2  | 0.18338013  | - T2D risk | ExonBnd |
| cg26154135 | UXS1    | chr2  | 0.18338013  | - T2D risk | Body    |
| cg04869538 | SLC30A8 | chr8  | 0.183445874 | + T2D risk | 5'UTR   |
| cg04795779 | CHID1   | chr11 | 0.183509471 | - T2D risk | 5'UTR   |
| cg04795779 | CHID1   | chr11 | 0.183509471 | - T2D risk | TSS200  |
| cg18835653 | NOL4    | chr18 | 0.183526757 | - T2D risk | Body    |
| cg00163554 | DIP2C   | chr10 | 0.183584105 | - T2D risk | Body    |
| cg14100005 | PRKAG2  | chr7  | 0.183622814 | - T2D risk | 5'UTR   |
| cg14100005 | PRKAG2  | chr7  | 0.183622814 | - T2D risk | Body    |
| cg01591487 | PRKAG2  | chr7  | 0.183785432 | + T2D risk | Body    |
| cg26624398 | SLIT3   | chr5  | 0.183986072 | - T2D risk | Body    |
| cg20478190 | CLEC16A | chr16 | 0.183999916 | - T2D risk | Body    |
| cg08316955 | CHID1   | chr11 | 0.184009445 | + T2D risk | ExonBnd |
| cg08316955 | CHID1   | chr11 | 0.184009445 | + T2D risk | Body    |
| cg09923648 | DIP2C   | chr10 | 0.184050796 | + T2D risk | Body    |
| cg18200749 | ULK4    | chr3  | 0.184304782 | - T2D risk | Body    |
| cg07677047 | PDLIM5  | chr4  | 0.184326081 | - T2D risk | 3'UTR   |
| cg07677047 | PDLIM5  | chr4  | 0.184326081 | - T2D risk | Body    |
| cg21351830 | RSF1    | chr11 | 0.18439286  | + T2D risk | Body    |
| cg26918510 | SVIP    | chr11 | 0.184760062 | - T2D risk | TSS200  |
| cg01268541 | ANK2    | chr4  | 0.184950103 | - T2D risk | TSS200  |
| cg01268541 | ANK2    | chr4  | 0.184950103 | - T2D risk | Body    |
| cg06772829 | PACS1   | chr11 | 0.184989721 | - T2D risk | Body    |
| cg10072168 | PACRG   | chr6  | 0.185039135 | + T2D risk | Body    |
| cg01392878 | MGRN1   | chr16 | 0.185053702 | + T2D risk | Body    |
| cg22776362 | TJP1    | chr15 | 0.185057758 | - T2D risk | Body    |
| cg26142723 | SPAG9   | chr17 | 0.185096671 | + T2D risk | 3'UTR   |
| cg00846554 | PHACTR1 | chr6  | 0.185116309 | - T2D risk | Body    |
| cg17392018 | CALD1   | chr7  | 0.18513611  | - T2D risk | Body    |
| cg05679867 | PDE3A   | chr12 | 0.185393263 | - T2D risk | Body    |
| cg00739112 | RHOQ    | chr2  | 0.18541563  | + T2D risk | TSS1500 |
| cg16986485 | INPP4A  | chr2  | 0.18550151  | + T2D risk | 5'UTR   |
| cg15584755 | RNF157  | chr17 | 0.185633622 | - T2D risk | Body    |
| cg17574803 | ENAH    | chr1  | 0.185717345 | - T2D risk | Body    |
| cg10913777 | MMS19   | chr10 | 0.186046892 | + T2D risk | TSS200  |
| cg10802936 | RET     | chr10 | 0.186269354 | + T2D risk | Body    |
| cg11565358 | DIP2C   | chr10 | 0.186297509 | + T2D risk | Body    |
| cg12070221 | ANK3    | chr10 | 0.186306145 | + T2D risk | Body    |
| cg08992366 | DNAJC1  | chr10 | 0.186480232 | + T2D risk | TSS1500 |
| cg00375389 | ENAH    | chr1  | 0.186599607 | - T2D risk | Body    |
| cg22949170 | UBE2K   | chr4  | 0.186629165 | + T2D risk | Body    |
| cg21803983 | ATRN    | chr20 | 0.186651269 | - T2D risk | Body    |
| cg21272363 | CNTNAP2 | chr7  | 0.186687371 | + T2D risk | Body    |
| cg25718276 | PACS2   | chr14 | 0.186707874 | - T2D risk | TSS1500 |
| cg10430673 | RSF1    | chr11 | 0.18671928  | - T2D risk | Body    |
| cg10425245 | SLIT3   | chr5  | 0.186725585 | - T2D risk | Body    |
| cg03310939 | CUX1    | chr7  | 0.186811698 | + T2D risk | Body    |
| cg11407198 | KDM4B   | chr19 | 0.187065823 | + T2D risk | Body    |
| cg18243661 | GRK5    | chr10 | 0.187072911 | - T2D risk | Body    |
| cg04109745 | KDM4B   | chr19 | 0.187091844 | - T2D risk | Body    |
| cg23528787 | PDLIM5  | chr4  | 0.187134894 | + T2D risk | 5'UTR   |
| cg23528787 | PDLIM5  | chr4  | 0.187134894 | + T2D risk | Body    |
| cg20108695 | CUX2    | chr12 | 0.187201936 | - T2D risk | Body    |
| cg04322429 | RET     | chr10 | 0.187222578 | + T2D risk | Body    |
| cg02735557 | SPAG9   | chr17 | 0.187239388 | - T2D risk | Body    |
| cg11176472 | DIP2C   | chr10 | 0.187256268 | + T2D risk | Body    |
| cg02902969 | DIP2C   | chr10 | 0.187318914 | + T2D risk | Body    |
| cg22450501 | FARSB   | chr2  | 0.187475286 | + T2D risk | Body    |
| cg25662862 | ARHGEF9 | chrX  | 0.187494213 | - T2D risk | Body    |



|            |          |       |             |            |         |
|------------|----------|-------|-------------|------------|---------|
| cg17511604 | ZHX2     | chr8  | 0.187682914 | + T2D risk | 5'UTR   |
| cg04339860 | WWP2     | chr16 | 0.187848093 | - T2D risk | TSS200  |
| cg11774275 | SPAG9    | chr17 | 0.187985117 | + T2D risk | Body    |
| cg20237106 | PRKAG2   | chr7  | 0.1880166   | + T2D risk | Body    |
| cg12349027 | ROBO2    | chr3  | 0.188175166 | - T2D risk | 5'UTR   |
| cg12349027 | ROBO2    | chr3  | 0.188175166 | - T2D risk | 1stExon |
| cg12020132 | SLIT3    | chr5  | 0.188233103 | + T2D risk | Body    |
| cg22719878 | PRKAG2   | chr7  | 0.188243872 | - T2D risk | Body    |
| cg07265339 | WWP2     | chr16 | 0.188421292 | - T2D risk | 5'UTR   |
| cg03451586 | PTP4A2   | chr1  | 0.188455671 | - T2D risk | 5'UTR   |
| cg03451586 | PTP4A2   | chr1  | 0.188455671 | - T2D risk | TSS1500 |
| cg23609036 | ROBO2    | chr3  | 0.188623488 | + T2D risk | Body    |
| cg10950033 | PACRG    | chr6  | 0.188632556 | - T2D risk | 3'UTR   |
| cg19936912 | FAM160A1 | chr4  | 0.188632906 | + T2D risk | TSS1500 |
| cg12623375 | CDK8     | chr13 | 0.188686025 | - T2D risk | TSS200  |
| cg24034465 | ACTN4    | chr19 | 0.188717818 | + T2D risk | Body    |
| cg12856788 | SLIT3    | chr5  | 0.188835698 | + T2D risk | Body    |
| cg08440945 | PACS1    | chr11 | 0.188851166 | + T2D risk | Body    |
| cg09466887 | MEIS2    | chr15 | 0.188862246 | - T2D risk | Body    |
| cg03115235 | ZDHHC2   | chr8  | 0.189055544 | + T2D risk | Body    |
| cg08377888 | MAST1    | chr19 | 0.189078245 | - T2D risk | TSS1500 |
| cg03082902 | PPFIBP1  | chr12 | 0.189081081 | - T2D risk | 5'UTR   |
| cg13757409 | INPP4A   | chr2  | 0.18918465  | - T2D risk | Body    |
| cg22513396 | PRKAG2   | chr7  | 0.189227111 | + T2D risk | Body    |
| cg08885411 | ANK3     | chr10 | 0.189234242 | + T2D risk | TSS1500 |
| cg08885411 | ANK3     | chr10 | 0.189234242 | + T2D risk | Body    |
| cg00017271 | BIRC5    | chr17 | 0.189510802 | + T2D risk | 3'UTR   |
| cg09540111 | ST6GAL1  | chr3  | 0.189560414 | + T2D risk | 5'UTR   |
| cg16764955 | PRKCE    | chr2  | 0.18956439  | + T2D risk | Body    |
| cg07455845 | RHOA     | chr3  | 0.189604111 | - T2D risk | Body    |
| cg21202462 | SSBP2    | chr5  | 0.189660558 | - T2D risk | Body    |
| cg26203118 | PDE3A    | chr12 | 0.189837365 | - T2D risk | Body    |
| cg03429582 | RBM4     | chr11 | 0.189891035 | - T2D risk | 5'UTR   |
| cg07158816 | KIAA1217 | chr10 | 0.189904792 | + T2D risk | Body    |
| cg07091162 | SPOCK1   | chr5  | 0.189936521 | + T2D risk | Body    |
| cg12295590 | FAM160A1 | chr4  | 0.189984178 | - T2D risk | 5'UTR   |
| cg24208426 | NUP98    | chr11 | 0.190350636 | - T2D risk | TSS200  |
| cg06639835 | UBL3     | chr13 | 0.190372971 | + T2D risk | 1stExon |
| cg06639835 | UBL3     | chr13 | 0.190372971 | + T2D risk | 5'UTR   |
| cg26774981 | SRPK2    | chr7  | 0.190383401 | + T2D risk | Body    |
| cg06784576 | ATP6V1A  | chr3  | 0.190469765 | + T2D risk | 1stExon |
| cg06784576 | ATP6V1A  | chr3  | 0.190469765 | + T2D risk | 5'UTR   |
| cg02551301 | PTPRU    | chr1  | 0.190643485 | + T2D risk | Body    |
| cg20311092 | ITPKB    | chr1  | 0.190646465 | - T2D risk | Body    |
| cg20548013 | PHACTR1  | chr6  | 0.190763869 | - T2D risk | Body    |
| cg17008978 | PRKAG2   | chr7  | 0.190763957 | + T2D risk | Body    |
| cg06042842 | GALK2    | chr15 | 0.19082008  | + T2D risk | TSS1500 |
| cg03756660 | ADCY5    | chr3  | 0.190836954 | - T2D risk | Body    |
| cg25985538 | CPLX2    | chr5  | 0.190997587 | + T2D risk | 5'UTR   |
| cg23741364 | PRKCE    | chr2  | 0.191005151 | - T2D risk | Body    |
| cg03693492 | PRKCE    | chr2  | 0.191030513 | - T2D risk | Body    |
| cg07641926 | PCYT1A   | chr3  | 0.191037627 | + T2D risk | Body    |
| cg26697295 | TAB2     | chr6  | 0.191040379 | - T2D risk | 5'UTR   |
| cg26697295 | TAB2     | chr6  | 0.191040379 | - T2D risk | Body    |
| cg26427777 | ZHX2     | chr8  | 0.191100768 | + T2D risk | 5'UTR   |
| cg24212855 | SVIP     | chr11 | 0.191247997 | + T2D risk | Body    |
| cg01414824 | ITGA1    | chr5  | 0.191334854 | + T2D risk | Body    |
| cg10576019 | CUX2     | chr12 | 0.191353659 | - T2D risk | Body    |
| cg06360318 | TANC2    | chr17 | 0.19138676  | + T2D risk | Body    |
| cg22220936 | ST8SIA1  | chr12 | 0.19153658  | - T2D risk | Body    |
| cg09428340 | PACRG    | chr6  | 0.191539624 | - T2D risk | Body    |
| cg24827757 | SMG7     | chr1  | 0.19156766  | - T2D risk | 5'UTR   |
| cg24827757 | SMG7     | chr1  | 0.19156766  | - T2D risk | Body    |
| cg13870520 | SCARB2   | chr4  | 0.191646432 | + T2D risk | Body    |
| cg01907184 | DNAH9    | chr17 | 0.19178545  | - T2D risk | Body    |
| cg20757912 | SSBP2    | chr5  | 0.192052495 | - T2D risk | TSS200  |
| cg16022553 | UBE2K    | chr4  | 0.192075313 | - T2D risk | Body    |
| cg27505737 | WWP2     | chr16 | 0.192148636 | - T2D risk | Body    |
| cg16280399 | ATXN1    | chr6  | 0.192236252 | - T2D risk | 5'UTR   |
| cg01561200 | EVI5     | chr1  | 0.192360198 | - T2D risk | Body    |



|            |          |       |             |            |         |
|------------|----------|-------|-------------|------------|---------|
| cg00349159 | DIP2C    | chr10 | 0.19246279  | - T2D risk | Body    |
| cg24947555 | ITPKB    | chr1  | 0.192470552 | + T2D risk | TSS200  |
| cg02405041 | ST20     | chr15 | 0.192534266 | + T2D risk | 5'UTR   |
| cg02405041 | ST20     | chr15 | 0.192534266 | + T2D risk | Body    |
| cg06640584 | RHBDD1   | chr2  | 0.192626981 | - T2D risk | TSS200  |
| cg11555067 | INPP4A   | chr2  | 0.192662178 | - T2D risk | 5'UTR   |
| cg00849535 | ADCY5    | chr3  | 0.192694923 | + T2D risk | Body    |
| cg19115695 | APC      | chr5  | 0.192733179 | - T2D risk | TSS1500 |
| cg02387974 | PRKAG2   | chr7  | 0.192737036 | + T2D risk | Body    |
| cg19643097 | PACS2    | chr14 | 0.19279942  | + T2D risk | Body    |
| cg08089671 | TMEM131  | chr2  | 0.192821774 | + T2D risk | TSS1500 |
| cg16919546 | NF1      | chr17 | 0.192821814 | + T2D risk | Body    |
| cg14404382 | MDM1     | chr12 | 0.192911583 | - T2D risk | Body    |
| cg17048363 | CDK8     | chr13 | 0.192914566 | - T2D risk | 1stExon |
| cg03197301 | CUX1     | chr7  | 0.192922858 | + T2D risk | Body    |
| cg07230471 | JPH2     | chr20 | 0.192948361 | - T2D risk | Body    |
| cg25149281 | RHBDD1   | chr2  | 0.193037439 | - T2D risk | Body    |
| cg07790887 | PRKACB   | chr1  | 0.193081833 | + T2D risk | Body    |
| cg07790887 | PRKACB   | chr1  | 0.193081833 | + T2D risk | TSS1500 |
| cg01427460 | DACH1    | chr13 | 0.193137955 | + T2D risk | Body    |
| cg08964756 | EFR3A    | chr8  | 0.193349843 | - T2D risk | Body    |
| cg18575602 | CHFR     | chr12 | 0.193458213 | - T2D risk | Body    |
| cg22882563 | USP53    | chr4  | 0.193460469 | + T2D risk | 5'UTR   |
| cg21322003 | PRKCE    | chr2  | 0.193474907 | - T2D risk | Body    |
| cg06043710 | DIP2C    | chr10 | 0.193703243 | + T2D risk | Body    |
| cg22637030 | ULK4     | chr3  | 0.193720906 | - T2D risk | Body    |
| cg10381247 | IFT74    | chr9  | 0.193756043 | + T2D risk | 5'UTR   |
| cg17551240 | TBC1D5   | chr3  | 0.193885788 | - T2D risk | Body    |
| cg25334903 | CRYL1    | chr13 | 0.19404153  | - T2D risk | Body    |
| cg02294312 | NOTCH3   | chr19 | 0.19407442  | + T2D risk | Body    |
| cg11900091 | PRKCE    | chr2  | 0.194229284 | + T2D risk | Body    |
| cg25400243 | TMEM219  | chr16 | 0.194260575 | + T2D risk | 3'UTR   |
| cg14217584 | KCNIP3   | chr2  | 0.194578156 | - T2D risk | TSS200  |
| cg12466405 | AGPAT3   | chr21 | 0.194662894 | + T2D risk | 3'UTR   |
| cg02309459 | ATP6V1H  | chr8  | 0.19468521  | - T2D risk | Body    |
| cg04774496 | CHFR     | chr12 | 0.194744807 | + T2D risk | TSS1500 |
| cg10796899 | DIP2C    | chr10 | 0.194792318 | - T2D risk | Body    |
| cg12749048 | TSC22D1  | chr13 | 0.19483767  | - T2D risk | TSS1500 |
| cg12749048 | TSC22D1  | chr13 | 0.19483767  | - T2D risk | Body    |
| cg24823679 | KDM4B    | chr19 | 0.194909985 | - T2D risk | Body    |
| cg00516597 | NGLY1    | chr3  | 0.194912202 | + T2D risk | 1stExon |
| cg00516597 | NGLY1    | chr3  | 0.194912202 | + T2D risk | Body    |
| cg16424884 | MET      | chr7  | 0.19508999  | - T2D risk | Body    |
| cg06557606 | ATP6V1H  | chr8  | 0.195126674 | - T2D risk | TSS1500 |
| cg25737283 | DIP2C    | chr10 | 0.195377761 | + T2D risk | Body    |
| cg18588247 | ATP8A1   | chr4  | 0.195457158 | + T2D risk | Body    |
| cg04517274 | ACTN4    | chr19 | 0.195503174 | + T2D risk | Body    |
| cg21722612 | TPCN1    | chr12 | 0.195526209 | + T2D risk | 5'UTR   |
| cg21722612 | TPCN1    | chr12 | 0.195526209 | + T2D risk | Body    |
| cg27634258 | SPPL2A   | chr15 | 0.195538948 | - T2D risk | TSS200  |
| cg09827858 | TMEM59   | chr1  | 0.195542561 | - T2D risk | 5'UTR   |
| cg09827858 | TMEM59   | chr1  | 0.195542561 | - T2D risk | Body    |
| cg01999523 | CLASP2   | chr3  | 0.195636934 | - T2D risk | TSS200  |
| cg16282160 | NCOA2    | chr8  | 0.195846234 | - T2D risk | 5'UTR   |
| cg18461989 | ATXN1    | chr6  | 0.196014145 | + T2D risk | 5'UTR   |
| cg08538468 | SH3GL2   | chr9  | 0.196105727 | - T2D risk | 5'UTR   |
| cg08538468 | SH3GL2   | chr9  | 0.196105727 | - T2D risk | 1stExon |
| cg08606573 | CREBBP   | chr16 | 0.196135671 | - T2D risk | Body    |
| cg05248798 | TJP1     | chr15 | 0.196205588 | - T2D risk | Body    |
| cg08754967 | DIP2C    | chr10 | 0.196273792 | - T2D risk | TSS1500 |
| cg18400281 | KIAA1217 | chr10 | 0.196285642 | - T2D risk | Body    |
| cg19794013 | COL4A1   | chr13 | 0.196294757 | - T2D risk | Body    |
| cg25667409 | SLC7A2   | chr8  | 0.196466128 | + T2D risk | Body    |
| cg25667409 | SLC7A2   | chr8  | 0.196466128 | + T2D risk | 5'UTR   |
| cg11239111 | UXS1     | chr2  | 0.196487862 | - T2D risk | TSS1500 |
| cg20436707 | DIP2C    | chr10 | 0.196540506 | + T2D risk | Body    |
| cg00044871 | ATP8A2   | chr13 | 0.196560627 | + T2D risk | TSS1500 |
| cg06824134 | PRKCE    | chr2  | 0.196609902 | - T2D risk | TSS200  |
| cg16762439 | CNTNAP2  | chr7  | 0.19663002  | - T2D risk | Body    |
| cg21218069 | NF1      | chr17 | 0.196726617 | + T2D risk | Body    |



|            |                |       |             |            |         |
|------------|----------------|-------|-------------|------------|---------|
| cg25901805 | <i>PLAGL1</i>  | chr6  | 0.196801827 | + T2D risk | 5'UTR   |
| cg06855897 | <i>ATXN1</i>   | chr6  | 0.19705393  | - T2D risk | 5'UTR   |
| cg18128529 | <i>INPP4A</i>  | chr2  | 0.197236797 | - T2D risk | 3'UTR   |
| cg26161045 | <i>RTN4</i>    | chr2  | 0.197254999 | - T2D risk | TSS1500 |
| cg26161045 | <i>RTN4</i>    | chr2  | 0.197254999 | - T2D risk | 1stExon |
| cg15309028 | <i>CTR9</i>    | chr11 | 0.197257278 | - T2D risk | TSS1500 |
| cg03851014 | <i>ST20</i>    | chr15 | 0.197268099 | + T2D risk | TSS1500 |
| cg03851014 | <i>ST20</i>    | chr15 | 0.197268099 | + T2D risk | 5'UTR   |
| cg03851014 | <i>ST20</i>    | chr15 | 0.197268099 | + T2D risk | Body    |
| cg07618675 | <i>CREBBP</i>  | chr16 | 0.197274644 | + T2D risk | Body    |
| cg05999287 | <i>MET</i>     | chr7  | 0.197529792 | - T2D risk | TSS200  |
| cg01052428 | <i>PACS2</i>   | chr14 | 0.197579737 | + T2D risk | Body    |
| cg25432738 | <i>CRYL1</i>   | chr13 | 0.197586903 | - T2D risk | Body    |
| cg11203361 | <i>CUX1</i>    | chr7  | 0.197601926 | - T2D risk | Body    |
| cg07148691 | <i>ST6GAL1</i> | chr3  | 0.19763758  | + T2D risk | 5'UTR   |
| cg01521220 | <i>SKAP1</i>   | chr17 | 0.197880863 | + T2D risk | Body    |
| cg19870370 | <i>CRYL1</i>   | chr13 | 0.19794425  | - T2D risk | Body    |
| cg18094221 | <i>RHOA</i>    | chr3  | 0.197956308 | - T2D risk | 5'UTR   |
| cg19428799 | <i>ATP8A1</i>  | chr4  | 0.198348132 | - T2D risk | ExonBnd |
| cg19428799 | <i>ATP8A1</i>  | chr4  | 0.198348132 | - T2D risk | Body    |
| cg26388599 | <i>ATP6V1H</i> | chr8  | 0.198348447 | - T2D risk | Body    |
| cg23977061 | <i>DNAJC1</i>  | chr10 | 0.198363135 | + T2D risk | TSS1500 |
| cg08990626 | <i>DIP2C</i>   | chr10 | 0.198457444 | + T2D risk | Body    |
| cg00618450 | <i>SEZ6L</i>   | chr22 | 0.198477486 | - T2D risk | Body    |
| cg16487601 | <i>PDE5A</i>   | chr4  | 0.198483747 | + T2D risk | Body    |
| cg16718624 | <i>ROBO2</i>   | chr3  | 0.198627905 | - T2D risk | 5'UTR   |
| cg16718624 | <i>ROBO2</i>   | chr3  | 0.198627905 | - T2D risk | 1stExon |
| cg23596826 | <i>DIP2C</i>   | chr10 | 0.198650269 | - T2D risk | Body    |
| cg08368624 | <i>ARL15</i>   | chr5  | 0.198652479 | + T2D risk | Body    |
| cg19018844 | <i>DIP2C</i>   | chr10 | 0.198732938 | + T2D risk | Body    |
| cg13387972 | <i>DIP2C</i>   | chr10 | 0.198779382 | + T2D risk | Body    |
| cg05162569 | <i>PACS2</i>   | chr14 | 0.198816393 | + T2D risk | Body    |
| cg04995311 | <i>USP29</i>   | chr19 | 0.198932672 | - T2D risk | TSS1500 |
| cg00711327 | <i>SSB</i>     | chr2  | 0.199021416 | + T2D risk | TSS1500 |
| cg04086841 | <i>CEP126</i>  | chr11 | 0.199024942 | + T2D risk | Body    |
| cg05130201 | <i>GLG1</i>    | chr16 | 0.199033906 | - T2D risk | Body    |
| cg10451728 | <i>ATP8A2</i>  | chr13 | 0.199041953 | + T2D risk | Body    |
| cg07808424 | <i>ZHX2</i>    | chr8  | 0.199052443 | + T2D risk | 5'UTR   |
| cg03584826 | <i>RGS7</i>    | chr1  | 0.199119324 | - T2D risk | Body    |
| cg08677916 | <i>MEIS2</i>   | chr15 | 0.199178711 | + T2D risk | Body    |
| cg04534657 | <i>PDE7A</i>   | chr8  | 0.199314535 | - T2D risk | TSS1500 |
| cg04534657 | <i>PDE7A</i>   | chr8  | 0.199314535 | - T2D risk | Body    |
| cg04749873 | <i>NCOA2</i>   | chr8  | 0.19933053  | - T2D risk | Body    |
| cg24152818 | <i>DACH1</i>   | chr13 | 0.199417961 | - T2D risk | Body    |
| cg16746631 | <i>IMPA1</i>   | chr8  | 0.199463011 | - T2D risk | Body    |
| cg16746631 | <i>IMPA1</i>   | chr8  | 0.199463011 | - T2D risk | 5'UTR   |
| cg07365951 | <i>ENAH</i>    | chr1  | 0.199477289 | - T2D risk | Body    |
| cg07242890 | <i>ERC2</i>    | chr3  | 0.19959036  | + T2D risk | 3'UTR   |
| cg21426303 | <i>ZHX2</i>    | chr8  | 0.199613328 | - T2D risk | 5'UTR   |
| cg03119126 | <i>ASH1L</i>   | chr1  | 0.19971968  | - T2D risk | TSS200  |
| cg04979068 | <i>DNAJC1</i>  | chr10 | 0.199776793 | + T2D risk | Body    |
| cg24432747 | <i>PI15</i>    | chr8  | 0.199795239 | - T2D risk | TSS1500 |
| cg00160368 | <i>PDE7A</i>   | chr8  | 0.199795502 | - T2D risk | 5'UTR   |
| cg00160368 | <i>PDE7A</i>   | chr8  | 0.199795502 | - T2D risk | 1stExon |
| cg12885269 | <i>MTHFS</i>   | chr15 | 0.199813442 | - T2D risk | Body    |
| cg19307750 | <i>RGS7</i>    | chr1  | 0.199932858 | + T2D risk | Body    |
| cg23161126 | <i>ROBO2</i>   | chr3  | 0.200090552 | - T2D risk | 5'UTR   |
| cg23161126 | <i>ROBO2</i>   | chr3  | 0.200090552 | - T2D risk | Body    |
| cg09220593 | <i>ROBO2</i>   | chr3  | 0.200140542 | - T2D risk | 5'UTR   |
| cg09220593 | <i>ROBO2</i>   | chr3  | 0.200140542 | - T2D risk | Body    |
| cg26609776 | <i>PRKCE</i>   | chr2  | 0.200143267 | - T2D risk | Body    |
| cg16818691 | <i>TSHZ1</i>   | chr18 | 0.200143887 | + T2D risk | 5'UTR   |
| cg16818691 | <i>TSHZ1</i>   | chr18 | 0.200143887 | + T2D risk | Body    |
| cg26115149 | <i>SSBP2</i>   | chr5  | 0.20022528  | - T2D risk | Body    |
| cg26361671 | <i>MAN1A2</i>  | chr1  | 0.200320239 | - T2D risk | 3'UTR   |
| cg07654588 | <i>TBC1D5</i>  | chr3  | 0.200581531 | - T2D risk | 5'UTR   |
| cg07654588 | <i>TBC1D5</i>  | chr3  | 0.200581531 | - T2D risk | 1stExon |
| cg18106550 | <i>DDHD2</i>   | chr8  | 0.200711609 | + T2D risk | ExonBnd |
| cg18106550 | <i>DDHD2</i>   | chr8  | 0.200711609 | + T2D risk | Body    |
| cg18041207 | <i>DACH1</i>   | chr13 | 0.200907892 | - T2D risk | TSS200  |



|            |                 |       |             |            |         |
|------------|-----------------|-------|-------------|------------|---------|
| cg11754652 | <i>PHACTR1</i>  | chr6  | 0.20093915  | + T2D risk | Body    |
| cg04630800 | <i>ARPP19</i>   | chr15 | 0.20094729  | - T2D risk | Body    |
| cg12503168 | <i>CADM1</i>    | chr11 | 0.201008523 | - T2D risk | Body    |
| cg24830800 | <i>PRKCE</i>    | chr2  | 0.201095065 | + T2D risk | Body    |
| cg24166144 | <i>PRKCE</i>    | chr2  | 0.20110527  | + T2D risk | Body    |
| cg17094974 | <i>ITGA1</i>    | chr5  | 0.20112106  | + T2D risk | Body    |
| cg22510911 | <i>MAST1</i>    | chr19 | 0.201234843 | - T2D risk | Body    |
| cg22188880 | <i>TSGA10</i>   | chr2  | 0.201283153 | + T2D risk | 5'UTR   |
| cg22188880 | <i>TSGA10</i>   | chr2  | 0.201283153 | + T2D risk | TSS200  |
| cg21055888 | <i>SH3GL2</i>   | chr9  | 0.201394019 | - T2D risk | TSS200  |
| cg22200557 | <i>ATP6V1H</i>  | chr8  | 0.201639836 | + T2D risk | Body    |
| cg09137851 | <i>ASH1L</i>    | chr1  | 0.201675041 | + T2D risk | 5'UTR   |
| cg22809798 | <i>NOTCH3</i>   | chr19 | 0.201708951 | + T2D risk | Body    |
| cg02456521 | <i>ATP4A</i>    | chr19 | 0.201732842 | - T2D risk | Body    |
| cg06008406 | <i>DIP2C</i>    | chr10 | 0.201863808 | - T2D risk | Body    |
| cg19860154 | <i>TSHZ1</i>    | chr18 | 0.201949485 | + T2D risk | Body    |
| cg22908574 | <i>ADCY5</i>    | chr3  | 0.202005462 | - T2D risk | Body    |
| cg18167767 | <i>ULK4</i>     | chr3  | 0.202080205 | + T2D risk | Body    |
| cg00992711 | <i>SLC29A4</i>  | chr7  | 0.202117909 | + T2D risk | 5'UTR   |
| cg11686722 | <i>MEIS2</i>    | chr15 | 0.202272969 | + T2D risk | 5'UTR   |
| cg11686722 | <i>MEIS2</i>    | chr15 | 0.202272969 | + T2D risk | 1stExon |
| cg11686722 | <i>MEIS2</i>    | chr15 | 0.202272969 | + T2D risk | TSS200  |
| cg11686722 | <i>MEIS2</i>    | chr15 | 0.202272969 | + T2D risk | TSS1500 |
| cg08799766 | <i>GNA12</i>    | chr7  | 0.202308956 | + T2D risk | Body    |
| cg17585208 | <i>PDE5A</i>    | chr4  | 0.202364388 | + T2D risk | Body    |
| cg03094990 | <i>PLAGL1</i>   | chr6  | 0.202446924 | - T2D risk | 5'UTR   |
| cg02699336 | <i>ERC2</i>     | chr3  | 0.202495589 | + T2D risk | 5'UTR   |
| cg07505433 | <i>KDM4B</i>    | chr19 | 0.202538784 | + T2D risk | Body    |
| cg03505501 | <i>CADM1</i>    | chr11 | 0.202685141 | + T2D risk | Body    |
| cg13270853 | <i>CHFR</i>     | chr12 | 0.202696834 | + T2D risk | Body    |
| cg06119874 | <i>PFKFB2</i>   | chr1  | 0.202765212 | + T2D risk | TSS1500 |
| cg11171459 | <i>DIP2C</i>    | chr10 | 0.202842361 | + T2D risk | Body    |
| cg04610601 | <i>SLIT3</i>    | chr5  | 0.203059788 | - T2D risk | Body    |
| cg08996301 | <i>ATXN1</i>    | chr6  | 0.203114523 | - T2D risk | Body    |
| cg17748725 | <i>KREMEN1</i>  | chr22 | 0.203315285 | - T2D risk | Body    |
| cg12010548 | <i>PACS2</i>    | chr14 | 0.203334051 | - T2D risk | Body    |
| cg06874640 | <i>PHACTR1</i>  | chr6  | 0.203462149 | - T2D risk | TSS1500 |
| cg04827594 | <i>ANK3</i>     | chr10 | 0.203666465 | - T2D risk | Body    |
| cg20212339 | <i>HMBX1</i>    | chr8  | 0.203741383 | + T2D risk | 3'UTR   |
| cg22493759 | <i>CREBBP</i>   | chr16 | 0.20385678  | + T2D risk | Body    |
| cg04071804 | <i>NCOR1</i>    | chr17 | 0.203903878 | + T2D risk | Body    |
| cg08032407 | <i>LAMA4</i>    | chr6  | 0.20398185  | - T2D risk | Body    |
| cg02061711 | <i>DIP2C</i>    | chr10 | 0.204293218 | - T2D risk | Body    |
| cg07263694 | <i>CUX2</i>     | chr12 | 0.20433939  | + T2D risk | Body    |
| cg23542518 | <i>LAP3</i>     | chr4  | 0.204561432 | - T2D risk | TSS1500 |
| cg27122958 | <i>NF1</i>      | chr17 | 0.20456319  | - T2D risk | Body    |
| cg21491235 | <i>RAP1B</i>    | chr12 | 0.204570201 | - T2D risk | 5'UTR   |
| cg14463441 | <i>PPP1R12A</i> | chr12 | 0.204577822 | + T2D risk | Body    |
| cg14463441 | <i>PPP1R12A</i> | chr12 | 0.204577822 | + T2D risk | ExonBnd |
| cg07662029 | <i>FLT1</i>     | chr13 | 0.204630655 | - T2D risk | Body    |
| cg15146083 | <i>CHID1</i>    | chr11 | 0.204672871 | + T2D risk | 5'UTR   |
| cg16057048 | <i>AGPAT3</i>   | chr21 | 0.204871764 | - T2D risk | 5'UTR   |
| cg04128513 | <i>SLIT3</i>    | chr5  | 0.204905147 | - T2D risk | Body    |
| cg17037091 | <i>PDLIM5</i>   | chr4  | 0.205072977 | - T2D risk | 5'UTR   |
| cg17037091 | <i>PDLIM5</i>   | chr4  | 0.205072977 | - T2D risk | Body    |
| cg10934522 | <i>TENM2</i>    | chr5  | 0.205092206 | - T2D risk | Body    |
| cg20716058 | <i>PRKAG2</i>   | chr7  | 0.2050945   | - T2D risk | TSS1500 |
| cg20716058 | <i>PRKAG2</i>   | chr7  | 0.2050945   | - T2D risk | Body    |
| cg03530210 | <i>WDR47</i>    | chr1  | 0.205202483 | + T2D risk | 5'UTR   |
| cg03530210 | <i>WDR47</i>    | chr1  | 0.205202483 | + T2D risk | 1stExon |
| cg00990690 | <i>ATP8A2</i>   | chr13 | 0.205205186 | - T2D risk | Body    |
| cg00144839 | <i>PRKAG2</i>   | chr7  | 0.205286441 | - T2D risk | Body    |
| cg03411346 | <i>SCGN</i>     | chr6  | 0.205445488 | + T2D risk | TSS1500 |
| cg16711083 | <i>SNX4</i>     | chr3  | 0.205457798 | - T2D risk | TSS200  |
| cg19907409 | <i>SPAG9</i>    | chr17 | 0.205491581 | - T2D risk | Body    |
| cg18575710 | <i>TTC28</i>    | chr22 | 0.205492497 | - T2D risk | Body    |
| cg22636811 | <i>TENM2</i>    | chr5  | 0.205503595 | - T2D risk | Body    |
| cg19686543 | <i>CNTNAP2</i>  | chr7  | 0.205553264 | - T2D risk | Body    |
| cg07208691 | <i>CUX2</i>     | chr12 | 0.205649287 | - T2D risk | Body    |
| cg27058120 | <i>TAB2</i>     | chr6  | 0.205768241 | + T2D risk | Body    |



|            |          |       |             |            |         |
|------------|----------|-------|-------------|------------|---------|
| cg24389195 | UBL3     | chr13 | 0.20580373  | - T2D risk | Body    |
| cg15676084 | ENAH     | chr1  | 0.205853936 | + T2D risk | TSS1500 |
| cg16842654 | TTC28    | chr22 | 0.205878869 | - T2D risk | Body    |
| cg21037006 | CALD1    | chr7  | 0.205932939 | + T2D risk | Body    |
| cg21037006 | CALD1    | chr7  | 0.205932939 | + T2D risk | TSS1500 |
| cg09680530 | FLT1     | chr13 | 0.206053211 | + T2D risk | Body    |
| cg18275467 | CUX1     | chr7  | 0.206128676 | + T2D risk | Body    |
| cg07733198 | CLEC16A  | chr16 | 0.206177727 | - T2D risk | Body    |
| cg10839502 | DIP2C    | chr10 | 0.206323134 | + T2D risk | Body    |
| cg17054710 | CLASP2   | chr3  | 0.206343845 | - T2D risk | TSS200  |
| cg04041942 | HMBOX1   | chr8  | 0.206378575 | + T2D risk | TSS1500 |
| cg15689036 | ERC2     | chr3  | 0.206434031 | - T2D risk | Body    |
| cg14214834 | ADCY5    | chr3  | 0.206447516 | - T2D risk | Body    |
| cg25670061 | PACRG    | chr6  | 0.206490594 | + T2D risk | Body    |
| cg26164164 | TOP2A    | chr17 | 0.206593716 | - T2D risk | 5'UTR   |
| cg26164164 | TOP2A    | chr17 | 0.206593716 | - T2D risk | 1stExon |
| cg17707755 | COX6A1   | chr12 | 0.206866427 | + T2D risk | TSS1500 |
| cg27449255 | WWP2     | chr16 | 0.206875485 | + T2D risk | Body    |
| cg01311064 | DACH1    | chr13 | 0.206930947 | - T2D risk | 5'UTR   |
| cg01311064 | DACH1    | chr13 | 0.206930947 | - T2D risk | 1stExon |
| cg23630593 | CUX1     | chr7  | 0.206944168 | + T2D risk | Body    |
| cg09577425 | PACRG    | chr6  | 0.206996381 | + T2D risk | Body    |
| cg19412131 | ATXN1    | chr6  | 0.20700411  | + T2D risk | 5'UTR   |
| cg00973932 | IFT74    | chr9  | 0.207054496 | + T2D risk | TSS1500 |
| cg17021528 | ATP8A2   | chr13 | 0.207150175 | - T2D risk | Body    |
| cg01769160 | PRMT3    | chr11 | 0.207177985 | - T2D risk | TSS200  |
| cg06416086 | TAB2     | chr6  | 0.207263283 | + T2D risk | 5'UTR   |
| cg06416086 | TAB2     | chr6  | 0.207263283 | + T2D risk | TSS1500 |
| cg06416086 | TAB2     | chr6  | 0.207263283 | + T2D risk | Body    |
| cg06416086 | TAB2     | chr6  | 0.207263283 | + T2D risk | 1stExon |
| cg19296486 | ATP6V1H  | chr8  | 0.207280017 | + T2D risk | Body    |
| cg23402311 | IMPA1    | chr8  | 0.207456805 | - T2D risk | TSS200  |
| cg19829887 | CEP126   | chr11 | 0.207502464 | - T2D risk | Body    |
| cg22642718 | KCNJ12   | chr17 | 0.207566817 | + T2D risk | Body    |
| cg23445360 | NCOA2    | chr8  | 0.207607951 | + T2D risk | TSS200  |
| cg26964170 | DIP2C    | chr10 | 0.207726921 | - T2D risk | Body    |
| cg15689835 | LMX1B    | chr9  | 0.207797729 | - T2D risk | Body    |
| cg08663444 | SRPK2    | chr7  | 0.207818236 | + T2D risk | Body    |
| cg06859970 | CLEC16A  | chr16 | 0.207838656 | + T2D risk | Body    |
| cg03595348 | KCNIP3   | chr2  | 0.207840672 | - T2D risk | Body    |
| cg03650179 | AGPAT3   | chr21 | 0.207860392 | + T2D risk | 5'UTR   |
| cg22033264 | CLIC5    | chr6  | 0.207889098 | - T2D risk | Body    |
| cg04071758 | CREBBP   | chr16 | 0.207945265 | - T2D risk | 3'UTR   |
| cg10297007 | ATXN1    | chr6  | 0.208020906 | - T2D risk | 5'UTR   |
| cg16253786 | RHBDD1   | chr2  | 0.208061023 | - T2D risk | Body    |
| cg14678099 | CPLX2    | chr5  | 0.208158578 | + T2D risk | 5'UTR   |
| cg18118760 | RSF1     | chr11 | 0.208279692 | - T2D risk | Body    |
| cg02079693 | MYO6     | chr6  | 0.208311773 | + T2D risk | Body    |
| cg21257048 | PRKCB    | chr16 | 0.208357036 | + T2D risk | Body    |
| cg23127000 | RTN4     | chr2  | 0.208395775 | + T2D risk | Body    |
| cg06318386 | PHF21A   | chr11 | 0.2084323   | + T2D risk | Body    |
| cg26133518 | TTC28    | chr22 | 0.208581416 | + T2D risk | Body    |
| cg01664142 | ATP8A1   | chr4  | 0.208674392 | - T2D risk | Body    |
| cg02183105 | ST20     | chr15 | 0.208859268 | + T2D risk | TSS200  |
| cg23958638 | RANBP17  | chr5  | 0.208950592 | - T2D risk | Body    |
| cg07754887 | DYNC111  | chr7  | 0.209039076 | - T2D risk | Body    |
| cg19924196 | LMCD1    | chr3  | 0.2090764   | - T2D risk | TSS200  |
| cg12386414 | ERC2     | chr3  | 0.209083496 | - T2D risk | Body    |
| cg16911423 | GAD1     | chr2  | 0.209270296 | - T2D risk | 5'UTR   |
| cg06939451 | SSBP2    | chr5  | 0.209301096 | - T2D risk | Body    |
| cg20187308 | DIP2C    | chr10 | 0.209350641 | - T2D risk | Body    |
| cg07027226 | PRKAG2   | chr7  | 0.209373031 | - T2D risk | Body    |
| cg06561659 | KCNIP3   | chr2  | 0.209390161 | - T2D risk | Body    |
| cg20322257 | NUCB2    | chr11 | 0.209471092 | - T2D risk | Body    |
| cg14747166 | ZHX2     | chr8  | 0.209508078 | - T2D risk | 5'UTR   |
| cg27447286 | DYNC111  | chr7  | 0.209524891 | - T2D risk | Body    |
| cg14441584 | RAP1GAP2 | chr17 | 0.209531236 | + T2D risk | Body    |
| cg18564665 | PHACTR1  | chr6  | 0.209625335 | - T2D risk | Body    |
| cg08125365 | SEC31A   | chr4  | 0.209640075 | - T2D risk | ExonBnd |
| cg08125365 | SEC31A   | chr4  | 0.209640075 | - T2D risk | Body    |



|            |          |       |             |            |         |
|------------|----------|-------|-------------|------------|---------|
| cg13726218 | DACH1    | chr13 | 0.209643316 | - T2D risk | Body    |
| cg27501380 | RBBP6    | chr16 | 0.209645539 | - T2D risk | 5'UTR   |
| cg27501380 | RBBP6    | chr16 | 0.209645539 | - T2D risk | 1stExon |
| cg04225902 | SUB1     | chr5  | 0.209699637 | - T2D risk | TSS1500 |
| cg00859277 | CDK8     | chr13 | 0.209762576 | + T2D risk | Body    |
| cg17600231 | TSC22D1  | chr13 | 0.209779323 | - T2D risk | 3'UTR   |
| cg11358315 | BCAT1    | chr12 | 0.209806757 | - T2D risk | Body    |
| cg17120445 | CUX2     | chr12 | 0.209833578 | + T2D risk | Body    |
| cg24786911 | ADCY5    | chr3  | 0.209890931 | - T2D risk | Body    |
| cg24786911 | ADCY5    | chr3  | 0.209890931 | - T2D risk | TSS200  |
| cg02849766 | WIZ      | chr19 | 0.209904498 | + T2D risk | 5'UTR   |
| cg18590839 | WWP2     | chr16 | 0.209992524 | - T2D risk | Body    |
| cg17096328 | CNTNAP2  | chr7  | 0.210074963 | - T2D risk | Body    |
| cg21762610 | UNC80    | chr2  | 0.210076372 | + T2D risk | Body    |
| cg11970797 | CRYL1    | chr13 | 0.210087183 | - T2D risk | Body    |
| cg10720163 | ARPP19   | chr15 | 0.210155018 | + T2D risk | TSS1500 |
| cg10720163 | ARPP19   | chr15 | 0.210155018 | + T2D risk | 5'UTR   |
| cg10720163 | ARPP19   | chr15 | 0.210155018 | + T2D risk | 1stExon |
| cg10720163 | ARPP19   | chr15 | 0.210155018 | + T2D risk | TSS200  |
| cg19853364 | INPP4A   | chr2  | 0.210226543 | + T2D risk | 5'UTR   |
| cg22544914 | CUX2     | chr12 | 0.210237308 | + T2D risk | Body    |
| cg10029837 | RHBDD1   | chr2  | 0.21048443  | + T2D risk | Body    |
| cg01102232 | DNAJC13  | chr3  | 0.210507329 | + T2D risk | TSS1500 |
| cg05960024 | CLOCK    | chr4  | 0.210544772 | + T2D risk | 5'UTR   |
| cg12619961 | ATXN1    | chr6  | 0.210553351 | + T2D risk | 5'UTR   |
| cg03688668 | KDM4B    | chr19 | 0.210808388 | + T2D risk | Body    |
| cg04031016 | POC1B    | chr12 | 0.210913105 | - T2D risk | Body    |
| cg15213650 | KDM4B    | chr19 | 0.211022344 | + T2D risk | 5'UTR   |
| cg26340376 | CLIC5    | chr6  | 0.211100578 | + T2D risk | Body    |
| cg12005569 | SPOCK1   | chr5  | 0.211179707 | + T2D risk | Body    |
| cg24820342 | DYNC1I2  | chr2  | 0.211378844 | + T2D risk | 5'UTR   |
| cg24820342 | DYNC1I2  | chr2  | 0.211378844 | + T2D risk | 1stExon |
| cg25301103 | DIP2C    | chr10 | 0.211437688 | + T2D risk | Body    |
| cg24788291 | PRKCE    | chr2  | 0.211502367 | + T2D risk | Body    |
| cg24846842 | SSBP2    | chr5  | 0.211526752 | + T2D risk | Body    |
| cg06280578 | INPP4A   | chr2  | 0.211653004 | + T2D risk | 5'UTR   |
| cg04361379 | RNF157   | chr17 | 0.21171277  | + T2D risk | Body    |
| cg01217350 | FAM160A1 | chr4  | 0.211842004 | - T2D risk | 5'UTR   |
| cg07804434 | PRKAG2   | chr7  | 0.211864821 | + T2D risk | Body    |
| cg03982541 | PACS2    | chr14 | 0.211981517 | - T2D risk | TSS1500 |
| cg02894362 | ACTN4    | chr19 | 0.212061345 | - T2D risk | Body    |
| cg02894362 | ACTN4    | chr19 | 0.212061345 | - T2D risk | ExonBnd |
| cg21769137 | SLIT3    | chr5  | 0.212138767 | - T2D risk | Body    |
| cg16542941 | SRPK2    | chr7  | 0.212160305 | - T2D risk | Body    |
| cg13372163 | SLC29A4  | chr7  | 0.212163548 | + T2D risk | TSS1500 |
| cg14623927 | PTPRU    | chr1  | 0.2122683   | + T2D risk | Body    |
| cg14209037 | DLL4     | chr15 | 0.212277606 | + T2D risk | Body    |
| cg09096054 | DACH1    | chr13 | 0.212277606 | + T2D risk | Body    |
| cg24309040 | CUX2     | chr12 | 0.212277606 | + T2D risk | Body    |
| cg26736200 | WWP2     | chr16 | 0.212277606 | + T2D risk | Body    |
| cg10348368 | PACS2    | chr14 | 0.212277606 | + T2D risk | Body    |
| cg04592958 | KDM4B    | chr19 | 0.212277606 | + T2D risk | Body    |
| cg05898629 | CREBBP   | chr16 | 0.212277606 | + T2D risk | Body    |
| cg17608529 | DIP2C    | chr10 | 0.212277606 | + T2D risk | Body    |
| cg17230640 | SLC29A4  | chr7  | 0.212277606 | + T2D risk | 3'UTR   |
| cg16765268 | CLEC16A  | chr16 | 0.212277606 | + T2D risk | Body    |
| cg27349129 | KDM4B    | chr19 | 0.212277606 | + T2D risk | Body    |
| cg12710220 | PRKAG2   | chr7  | 0.212277606 | + T2D risk | Body    |
| cg15600935 | CUX1     | chr7  | 0.212277606 | + T2D risk | Body    |
| cg26718707 | DIP2C    | chr10 | 0.212277606 | + T2D risk | Body    |
| cg13617047 | DIP2C    | chr10 | 0.212277606 | + T2D risk | Body    |
| cg17714861 | PRKAG2   | chr7  | 0.212277606 | + T2D risk | Body    |
| cg19608357 | KDM4B    | chr19 | 0.212277606 | + T2D risk | 5'UTR   |
| cg13592780 | ADCY5    | chr3  | 0.212277606 | + T2D risk | Body    |
| cg09356193 | PACS2    | chr14 | 0.212277606 | + T2D risk | Body    |
| cg04285855 | PACS2    | chr14 | 0.212277606 | + T2D risk | Body    |
| cg21903221 | PACS2    | chr14 | 0.212277606 | + T2D risk | Body    |
| cg06509362 | WWP2     | chr16 | 0.212277606 | + T2D risk | Body    |
| cg12242062 | PRKAG2   | chr7  | 0.212277606 | + T2D risk | Body    |
| cg16162172 | ACTN4    | chr19 | 0.212277606 | + T2D risk | Body    |



|            |                 |       |             |            |         |
|------------|-----------------|-------|-------------|------------|---------|
| cg10024446 | <i>DNAJC1</i>   | chr10 | 0.212277606 | + T2D risk | Body    |
| cg02606627 | <i>KDM4B</i>    | chr19 | 0.212277606 | + T2D risk | Body    |
| cg00412239 | <i>KDM4B</i>    | chr19 | 0.212277606 | + T2D risk | Body    |
| cg05367028 | <i>PRKAG2</i>   | chr7  | 0.212277606 | + T2D risk | 5'UTR   |
| cg05367028 | <i>PRKAG2</i>   | chr7  | 0.212277606 | + T2D risk | Body    |
| cg02072002 | <i>MGRN1</i>    | chr16 | 0.212277606 | + T2D risk | Body    |
| cg02072002 | <i>MGRN1</i>    | chr16 | 0.212277606 | + T2D risk | 3'UTR   |
| cg11740194 | <i>DIP2C</i>    | chr10 | 0.212277606 | + T2D risk | Body    |
| cg17279942 | <i>CUX2</i>     | chr12 | 0.212277606 | + T2D risk | Body    |
| cg20154489 | <i>DIP2C</i>    | chr10 | 0.212277606 | + T2D risk | Body    |
| cg00533585 | <i>GRK5</i>     | chr10 | 0.212277606 | + T2D risk | 3'UTR   |
| cg00387107 | <i>CUX1</i>     | chr7  | 0.212277606 | + T2D risk | Body    |
| cg14897316 | <i>CUX2</i>     | chr12 | 0.212277606 | + T2D risk | Body    |
| cg17549725 | <i>PACRG</i>    | chr6  | 0.212277606 | + T2D risk | Body    |
| cg27562595 | <i>CNTNAP2</i>  | chr7  | 0.212277606 | + T2D risk | Body    |
| cg01918552 | <i>PACRG</i>    | chr6  | 0.212277606 | + T2D risk | Body    |
| cg10118784 | <i>PLEKHG3</i>  | chr14 | 0.212277606 | + T2D risk | Body    |
| cg26856871 | <i>AGPAT3</i>   | chr21 | 0.212277606 | + T2D risk | 5'UTR   |
| cg19388017 | <i>NOTCH3</i>   | chr19 | 0.212277606 | + T2D risk | Body    |
| cg03564009 | <i>COL4A1</i>   | chr13 | 0.212277606 | + T2D risk | Body    |
| cg05194481 | <i>DIP2C</i>    | chr10 | 0.212277606 | + T2D risk | Body    |
| cg02803925 | <i>PCYT1A</i>   | chr3  | 0.212277606 | + T2D risk | Body    |
| cg18558744 | <i>DIP2C</i>    | chr10 | 0.212277606 | + T2D risk | Body    |
| cg17127309 | <i>RET</i>      | chr10 | 0.212277606 | + T2D risk | Body    |
| cg12892107 | <i>SLIT3</i>    | chr5  | 0.212277606 | + T2D risk | Body    |
| cg07846737 | <i>KDM4B</i>    | chr19 | 0.212277606 | + T2D risk | Body    |
| cg12699044 | <i>TPCN1</i>    | chr12 | 0.212277606 | + T2D risk | Body    |
| cg10608858 | <i>PRKAG2</i>   | chr7  | 0.212277606 | + T2D risk | 5'UTR   |
| cg10608858 | <i>PRKAG2</i>   | chr7  | 0.212277606 | + T2D risk | Body    |
| cg23839891 | <i>KDM4B</i>    | chr19 | 0.212277606 | + T2D risk | Body    |
| cg09036558 | <i>WWP2</i>     | chr16 | 0.212277606 | + T2D risk | Body    |
| cg07015081 | <i>DNAJC1</i>   | chr10 | 0.212277606 | + T2D risk | Body    |
| cg23190472 | <i>LAP3</i>     | chr4  | 0.212277606 | + T2D risk | Body    |
| cg08755156 | <i>PRKAG2</i>   | chr7  | 0.212277606 | + T2D risk | Body    |
| cg22630768 | <i>KDM4B</i>    | chr19 | 0.212277606 | + T2D risk | Body    |
| cg06648073 | <i>APBA1</i>    | chr9  | 0.212277606 | + T2D risk | ExonBnd |
| cg06648073 | <i>APBA1</i>    | chr9  | 0.212277606 | + T2D risk | Body    |
| cg05890154 | <i>PRKAG2</i>   | chr7  | 0.212277606 | + T2D risk | Body    |
| cg01558195 | <i>CUX1</i>     | chr7  | 0.212277606 | + T2D risk | Body    |
| cg00802484 | <i>UBE2K</i>    | chr4  | 0.212277606 | + T2D risk | Body    |
| cg04935666 | <i>PACS2</i>    | chr14 | 0.212277606 | + T2D risk | Body    |
| cg09567735 | <i>CUX2</i>     | chr12 | 0.212277606 | + T2D risk | Body    |
| cg21548869 | <i>PACS2</i>    | chr14 | 0.212277606 | + T2D risk | Body    |
| cg07478662 | <i>KDM4B</i>    | chr19 | 0.212277606 | + T2D risk | Body    |
| cg10580341 | <i>CHID1</i>    | chr11 | 0.212277606 | + T2D risk | Body    |
| cg04808658 | <i>SEMA3G</i>   | chr3  | 0.212277606 | + T2D risk | Body    |
| cg13350140 | <i>RET</i>      | chr10 | 0.212277606 | + T2D risk | Body    |
| cg03575974 | <i>ACTN4</i>    | chr19 | 0.212277606 | + T2D risk | Body    |
| cg00195144 | <i>DIP2C</i>    | chr10 | 0.212277606 | + T2D risk | Body    |
| cg26247841 | <i>ANK2</i>     | chr4  | 0.212277606 | + T2D risk | Body    |
| cg06498313 | <i>DIP2C</i>    | chr10 | 0.212277606 | + T2D risk | Body    |
| cg04213845 | <i>DIP2C</i>    | chr10 | 0.212277606 | + T2D risk | Body    |
| cg20471927 | <i>DIP2C</i>    | chr10 | 0.212277606 | + T2D risk | Body    |
| cg06471596 | <i>CUX1</i>     | chr7  | 0.212277606 | + T2D risk | Body    |
| cg16617758 | <i>KDM4B</i>    | chr19 | 0.212277606 | + T2D risk | Body    |
| cg24610790 | <i>GNA12</i>    | chr7  | 0.212277606 | + T2D risk | Body    |
| cg25887619 | <i>CUX1</i>     | chr7  | 0.212277606 | + T2D risk | Body    |
| cg15705062 | <i>KDM4B</i>    | chr19 | 0.212277606 | + T2D risk | Body    |
| cg24136740 | <i>DIP2C</i>    | chr10 | 0.212277606 | + T2D risk | Body    |
| cg04670766 | <i>TPCN1</i>    | chr12 | 0.212277606 | + T2D risk | Body    |
| cg21490597 | <i>ANK2</i>     | chr4  | 0.212277606 | + T2D risk | Body    |
| cg25028189 | <i>RAP1GAP2</i> | chr17 | 0.212277606 | + T2D risk | Body    |
| cg18638769 | <i>PACS2</i>    | chr14 | 0.212277606 | + T2D risk | Body    |
| cg24919753 | <i>GRK5</i>     | chr10 | 0.212277606 | + T2D risk | Body    |
| cg22079102 | <i>KDM4B</i>    | chr19 | 0.212277606 | + T2D risk | Body    |
| cg20517784 | <i>DIP2C</i>    | chr10 | 0.212277606 | + T2D risk | Body    |
| cg05676622 | <i>RBM4</i>     | chr11 | 0.212277606 | + T2D risk | Body    |
| cg01699430 | <i>CUX2</i>     | chr12 | 0.212277606 | + T2D risk | Body    |
| cg01244571 | <i>DIP2C</i>    | chr10 | 0.212277606 | + T2D risk | Body    |
| cg18698699 | <i>DIP2C</i>    | chr10 | 0.212277606 | + T2D risk | Body    |



|            |          |       |             |            |        |
|------------|----------|-------|-------------|------------|--------|
| cg02208820 | DIP2C    | chr10 | 0.212277606 | + T2D risk | Body   |
| cg15232214 | ZHX2     | chr8  | 0.212277606 | + T2D risk | Body   |
| cg03286391 | PACRG    | chr6  | 0.212277606 | + T2D risk | Body   |
| cg24429708 | DIP2C    | chr10 | 0.212277606 | + T2D risk | Body   |
| cg08829140 | CUX1     | chr7  | 0.212277606 | + T2D risk | Body   |
| cg01915888 | TPCN1    | chr12 | 0.212277606 | + T2D risk | Body   |
| cg02970735 | PACS2    | chr14 | 0.212277606 | + T2D risk | 3'UTR  |
| cg03559389 | DIP2C    | chr10 | 0.212277606 | + T2D risk | Body   |
| cg16576106 | MGRN1    | chr16 | 0.212277606 | + T2D risk | Body   |
| cg16576106 | MGRN1    | chr16 | 0.212277606 | + T2D risk | 3'UTR  |
| cg07046047 | CHID1    | chr11 | 0.212277606 | + T2D risk | Body   |
| cg27211136 | CLEC16A  | chr16 | 0.212277606 | + T2D risk | Body   |
| cg11378778 | KDM4B    | chr19 | 0.212277606 | + T2D risk | Body   |
| cg01361261 | DIP2C    | chr10 | 0.212277606 | + T2D risk | Body   |
| cg00774520 | KCNIP3   | chr2  | 0.212277606 | + T2D risk | Body   |
| cg11623677 | SGSM2    | chr17 | 0.212277606 | + T2D risk | Body   |
| cg21726593 | NOTCH3   | chr19 | 0.212277606 | + T2D risk | Body   |
| cg03680932 | ATXN1    | chr6  | 0.212277606 | + T2D risk | Body   |
| cg16560077 | CREBBP   | chr16 | 0.212277606 | + T2D risk | Body   |
| cg10062503 | KIAA0232 | chr4  | 0.212277606 | + T2D risk | Body   |
| cg10652674 | ANK3     | chr10 | 0.212277606 | + T2D risk | Body   |
| cg27324804 | CUX1     | chr7  | 0.212277606 | + T2D risk | Body   |
| cg06599322 | WIZ      | chr19 | 0.212277606 | + T2D risk | Body   |
| cg16976034 | CUX1     | chr7  | 0.212277606 | + T2D risk | Body   |
| cg11018271 | GNA12    | chr7  | 0.212277606 | + T2D risk | Body   |
| cg17352109 | USP29    | chr19 | 0.212277606 | + T2D risk | TSS200 |
| cg01712692 | RGS7     | chr1  | 0.212277606 | + T2D risk | Body   |
| cg18074403 | DIP2C    | chr10 | 0.212277606 | + T2D risk | Body   |
| cg17713751 | CUX1     | chr7  | 0.212277606 | + T2D risk | Body   |
| cg06952288 | DIP2C    | chr10 | 0.212277606 | + T2D risk | Body   |
| cg03686950 | SLC29A4  | chr7  | 0.212277606 | + T2D risk | Body   |
| cg25949093 | KDM4B    | chr19 | 0.212277606 | + T2D risk | Body   |
| cg12753366 | DIP2C    | chr10 | 0.212277606 | + T2D risk | Body   |
| cg05664895 | SLIT3    | chr5  | 0.212277606 | + T2D risk | Body   |
| cg07497933 | RANBP17  | chr5  | 0.212277606 | + T2D risk | Body   |
| cg19512693 | FLT1     | chr13 | 0.212277606 | + T2D risk | Body   |
| cg13867669 | APBA1    | chr9  | 0.212277606 | + T2D risk | Body   |
| cg06685304 | DIP2C    | chr10 | 0.212277606 | + T2D risk | Body   |
| cg26873457 | DIP2C    | chr10 | 0.212277606 | + T2D risk | Body   |
| cg07349203 | TPCN1    | chr12 | 0.212277606 | + T2D risk | Body   |
| cg18880543 | PRKAG2   | chr7  | 0.212277606 | + T2D risk | 5'UTR  |
| cg18880543 | PRKAG2   | chr7  | 0.212277606 | + T2D risk | Body   |
| cg08582182 | CUX1     | chr7  | 0.212277606 | + T2D risk | Body   |
| cg14455403 | LMCD1    | chr3  | 0.212277606 | + T2D risk | Body   |
| cg09362578 | GNA12    | chr7  | 0.212277606 | + T2D risk | Body   |
| cg20065718 | CHFR     | chr12 | 0.212277606 | + T2D risk | Body   |
| cg15096465 | DIP2C    | chr10 | 0.212277606 | + T2D risk | Body   |
| cg05979433 | CUX2     | chr12 | 0.212277606 | + T2D risk | Body   |
| cg11724750 | PACRG    | chr6  | 0.212277606 | + T2D risk | Body   |
| cg09563846 | CHID1    | chr11 | 0.212277606 | + T2D risk | Body   |
| cg04724275 | DIP2C    | chr10 | 0.212277606 | + T2D risk | Body   |
| cg18037489 | SGSM2    | chr17 | 0.212277606 | + T2D risk | Body   |
| cg03588299 | DIP2C    | chr10 | 0.212277606 | + T2D risk | Body   |
| cg12530103 | DIP2C    | chr10 | 0.212277606 | + T2D risk | Body   |
| cg25297146 | DIP2C    | chr10 | 0.212277606 | + T2D risk | Body   |
| cg19239104 | KDM4B    | chr19 | 0.212277606 | + T2D risk | Body   |
| cg16936421 | DIP2C    | chr10 | 0.212277606 | + T2D risk | Body   |
| cg21486579 | PLAGL1   | chr6  | 0.212277606 | + T2D risk | 5'UTR  |
| cg12465250 | PACRG    | chr6  | 0.212277606 | + T2D risk | Body   |
| cg20525229 | CUX2     | chr12 | 0.212277606 | + T2D risk | Body   |
| cg05483131 | DIP2C    | chr10 | 0.212277606 | + T2D risk | Body   |
| cg08498465 | CLEC16A  | chr16 | 0.212277606 | + T2D risk | Body   |
| cg25104619 | DYNC1I2  | chr2  | 0.212277606 | + T2D risk | Body   |
| cg12712747 | COL4A1   | chr13 | 0.212277606 | + T2D risk | Body   |
| cg23844018 | DIP2C    | chr10 | 0.212277606 | + T2D risk | Body   |
| cg25312876 | KDM4B    | chr19 | 0.212277606 | + T2D risk | 3'UTR  |
| cg13630560 | DIP2C    | chr10 | 0.212277606 | + T2D risk | Body   |
| cg24807761 | CALD1    | chr7  | 0.212277606 | + T2D risk | Body   |
| cg09848445 | RET      | chr10 | 0.212277606 | + T2D risk | Body   |
| cg27318635 | CREBBP   | chr16 | 0.212277606 | + T2D risk | Body   |



|            |          |       |             |            |         |
|------------|----------|-------|-------------|------------|---------|
| cg08419373 | WWP2     | chr16 | 0.212277606 | + T2D risk | Body    |
| cg27185772 | TPCN1    | chr12 | 0.212277606 | + T2D risk | Body    |
| cg07976816 | KIAA0232 | chr4  | 0.212277606 | + T2D risk | 3'UTR   |
| cg08701134 | WWP2     | chr16 | 0.212277606 | + T2D risk | Body    |
| cg23520889 | PACS2    | chr14 | 0.212277606 | + T2D risk | Body    |
| cg21080473 | DDC      | chr7  | 0.212277606 | + T2D risk | Body    |
| cg02842850 | KDM4B    | chr19 | 0.212277606 | + T2D risk | Body    |
| cg00248439 | GRK5     | chr10 | 0.212277606 | + T2D risk | Body    |
| cg14020326 | PACS2    | chr14 | 0.212277606 | + T2D risk | Body    |
| cg06105987 | PRKAG2   | chr7  | 0.212277606 | + T2D risk | Body    |
| cg27448595 | CHID1    | chr11 | 0.212277606 | + T2D risk | Body    |
| cg25754248 | KDM4B    | chr19 | 0.212277606 | + T2D risk | Body    |
| cg19264056 | PDE3A    | chr12 | 0.212277606 | + T2D risk | Body    |
| cg02407068 | UBE2K    | chr4  | 0.212277606 | + T2D risk | Body    |
| cg04586563 | DIP2C    | chr10 | 0.212277606 | + T2D risk | TSS1500 |
| cg16636182 | KDM4B    | chr19 | 0.212277606 | + T2D risk | Body    |
| cg06746318 | CUX1     | chr7  | 0.212277606 | + T2D risk | Body    |
| cg23874145 | CUX1     | chr7  | 0.212277606 | + T2D risk | Body    |
| cg27637597 | SLC29A4  | chr7  | 0.212277606 | + T2D risk | 3'UTR   |
| cg19541247 | PRKAG2   | chr7  | 0.212277606 | + T2D risk | 5'UTR   |
| cg19541247 | PRKAG2   | chr7  | 0.212277606 | + T2D risk | Body    |
| cg07171237 | CHFR     | chr12 | 0.212277606 | + T2D risk | Body    |
| cg06740765 | TENM2    | chr5  | 0.212277606 | + T2D risk | Body    |
| cg10584587 | PACRG    | chr6  | 0.212277606 | + T2D risk | Body    |
| cg24811125 | GRK5     | chr10 | 0.212277606 | + T2D risk | Body    |
| cg24544320 | ITPKB    | chr1  | 0.212277606 | + T2D risk | Body    |
| cg00864551 | PRKAG2   | chr7  | 0.212277606 | + T2D risk | 5'UTR   |
| cg00864551 | PRKAG2   | chr7  | 0.212277606 | + T2D risk | Body    |
| cg07940971 | DIP2C    | chr10 | 0.212277606 | + T2D risk | Body    |
| cg10297430 | CLEC16A  | chr16 | 0.212277606 | + T2D risk | Body    |
| cg10367296 | KDM4B    | chr19 | 0.212277606 | + T2D risk | Body    |
| cg19185641 | ATXN1    | chr6  | 0.212277606 | + T2D risk | 5'UTR   |
| cg15212354 | DIP2C    | chr10 | 0.212277606 | + T2D risk | Body    |
| cg18474185 | PACS2    | chr14 | 0.212277606 | + T2D risk | Body    |
| cg04735960 | CRYL1    | chr13 | 0.212277606 | + T2D risk | Body    |
| cg19500393 | DIP2C    | chr10 | 0.212277606 | + T2D risk | Body    |
| cg13985767 | GNA12    | chr7  | 0.212277606 | + T2D risk | Body    |
| cg20095674 | UNC80    | chr2  | 0.212277606 | + T2D risk | Body    |
| cg16889990 | USP29    | chr19 | 0.212277606 | + T2D risk | TSS200  |
| cg13559217 | KDM4B    | chr19 | 0.212277606 | + T2D risk | Body    |
| cg11644402 | CUX1     | chr7  | 0.212277606 | + T2D risk | Body    |
| cg26665209 | CHFR     | chr12 | 0.212277606 | + T2D risk | Body    |
| cg02569219 | SGSM2    | chr17 | 0.212277606 | + T2D risk | Body    |
| cg23946462 | CHID1    | chr11 | 0.212277606 | + T2D risk | Body    |
| cg06823965 | CUX1     | chr7  | 0.212277606 | + T2D risk | Body    |
| cg01947482 | PACS2    | chr14 | 0.212277606 | + T2D risk | Body    |
| cg14491482 | GRK5     | chr10 | 0.212277606 | + T2D risk | Body    |
| cg20688475 | KCNIP3   | chr2  | 0.212277606 | + T2D risk | Body    |
| cg10271315 | DIP2C    | chr10 | 0.212277606 | + T2D risk | Body    |
| cg17125804 | CUX2     | chr12 | 0.212277606 | + T2D risk | Body    |
| cg22401907 | ATXN1    | chr6  | 0.212277606 | + T2D risk | 5'UTR   |
| cg27581211 | CLEC16A  | chr16 | 0.212277606 | + T2D risk | Body    |
| cg09196257 | DIP2C    | chr10 | 0.212277606 | + T2D risk | Body    |
| cg18576013 | AGPAT3   | chr21 | 0.212277606 | + T2D risk | 3'UTR   |
| cg16303074 | RSF1     | chr11 | 0.212277606 | + T2D risk | Body    |
| cg08701479 | KDM4B    | chr19 | 0.212277606 | + T2D risk | Body    |
| cg26860604 | WWP2     | chr16 | 0.212277606 | + T2D risk | 1stExon |
| cg26860604 | WWP2     | chr16 | 0.212277606 | + T2D risk | 5'UTR   |
| cg26860604 | WWP2     | chr16 | 0.212277606 | + T2D risk | Body    |
| cg21186888 | UNC80    | chr2  | 0.212277606 | + T2D risk | Body    |
| cg12370175 | ADCY5    | chr3  | 0.212277606 | + T2D risk | Body    |
| cg21639613 | AGPAT3   | chr21 | 0.212277606 | + T2D risk | 3'UTR   |
| cg11358549 | NOTCH3   | chr19 | 0.212277606 | + T2D risk | Body    |
| cg04693895 | DIP2C    | chr10 | 0.212277606 | + T2D risk | Body    |
| cg26769118 | DIP2C    | chr10 | 0.212277606 | + T2D risk | Body    |
| cg15770446 | CUX1     | chr7  | 0.212277606 | + T2D risk | Body    |
| cg25661931 | ADCY5    | chr3  | 0.212277606 | + T2D risk | 1stExon |
| cg12937183 | PRKAG2   | chr7  | 0.212277606 | + T2D risk | Body    |
| cg22320999 | TPCN1    | chr12 | 0.212277606 | + T2D risk | 3'UTR   |
| cg15605030 | KCNIP3   | chr2  | 0.212277606 | + T2D risk | Body    |



|            |         |       |             |            |         |
|------------|---------|-------|-------------|------------|---------|
| cg25535708 | NOTCH3  | chr19 | 0.212277606 | + T2D risk | Body    |
| cg13544966 | DIP2C   | chr10 | 0.212277606 | + T2D risk | Body    |
| cg07658449 | CUX2    | chr12 | 0.212277606 | + T2D risk | Body    |
| cg19910568 | DNAJC1  | chr10 | 0.212277606 | + T2D risk | Body    |
| cg14616881 | CRYL1   | chr13 | 0.212277606 | + T2D risk | 3'UTR   |
| cg27191554 | NOTCH3  | chr19 | 0.212277606 | + T2D risk | Body    |
| cg14504291 | SLIT3   | chr5  | 0.212277606 | + T2D risk | Body    |
| cg27373220 | DIP2C   | chr10 | 0.212277606 | + T2D risk | Body    |
| cg00393546 | DIP2C   | chr10 | 0.212277606 | + T2D risk | Body    |
| cg18884557 | CUX1    | chr7  | 0.212277606 | + T2D risk | Body    |
| cg22772639 | CUX1    | chr7  | 0.212277606 | + T2D risk | Body    |
| cg04361015 | CUX1    | chr7  | 0.212277606 | + T2D risk | Body    |
| cg09943550 | CHFR    | chr12 | 0.212277606 | + T2D risk | Body    |
| cg06926306 | WIZ     | chr19 | 0.212277606 | + T2D risk | Body    |
| cg03346415 | WWP2    | chr16 | 0.212277606 | + T2D risk | Body    |
| cg13226924 | SGSM2   | chr17 | 0.212277606 | + T2D risk | Body    |
| cg01117269 | DIP2C   | chr10 | 0.212277606 | + T2D risk | Body    |
| cg05139081 | TPCN1   | chr12 | 0.212277606 | + T2D risk | Body    |
| cg14325029 | GRK5    | chr10 | 0.212277606 | + T2D risk | Body    |
| cg19473056 | ULK4    | chr3  | 0.212277606 | + T2D risk | 5'UTR   |
| cg06173663 | CUX1    | chr7  | 0.212277606 | + T2D risk | Body    |
| cg06976634 | CHID1   | chr11 | 0.212277606 | + T2D risk | Body    |
| cg19216660 | SGSM2   | chr17 | 0.212277606 | + T2D risk | Body    |
| cg06010390 | CUX1    | chr7  | 0.212277606 | + T2D risk | Body    |
| cg11096675 | SGSM2   | chr17 | 0.212277606 | + T2D risk | Body    |
| cg08897188 | PRKAG2  | chr7  | 0.212277606 | + T2D risk | 5'UTR   |
| cg08897188 | PRKAG2  | chr7  | 0.212277606 | + T2D risk | Body    |
| cg13475977 | CRYL1   | chr13 | 0.212277606 | + T2D risk | Body    |
| cg21490485 | PACS2   | chr14 | 0.212277606 | + T2D risk | Body    |
| cg03844838 | DIP2C   | chr10 | 0.212277606 | + T2D risk | Body    |
| cg24340453 | SLC29A4 | chr7  | 0.212277606 | + T2D risk | 3'UTR   |
| cg22147968 | CUX2    | chr12 | 0.212277606 | + T2D risk | Body    |
| cg27414105 | TBC1D5  | chr3  | 0.212317006 | + T2D risk | 5'UTR   |
| cg16544621 | PHACTR1 | chr6  | 0.212317194 | + T2D risk | Body    |
| cg17308981 | CHFR    | chr12 | 0.21235352  | - T2D risk | Body    |
| cg01067802 | CDH22   | chr20 | 0.212587926 | - T2D risk | Body    |
| cg16418301 | CLEC16A | chr16 | 0.212651406 | + T2D risk | Body    |
| cg02585702 | BCAT1   | chr12 | 0.212698058 | + T2D risk | Body    |
| cg02279224 | PLAGL1  | chr6  | 0.212713576 | - T2D risk | TSS1500 |
| cg20401555 | ZHX2    | chr8  | 0.2127354   | + T2D risk | 5'UTR   |
| cg15140236 | NCOA7   | chr6  | 0.212761856 | - T2D risk | Body    |
| cg15140236 | NCOA7   | chr6  | 0.212761856 | - T2D risk | TSS1500 |
| cg20071652 | TTC28   | chr22 | 0.212803507 | + T2D risk | Body    |
| cg06874242 | SLC29A4 | chr7  | 0.212811125 | - T2D risk | ExonBnd |
| cg06874242 | SLC29A4 | chr7  | 0.212811125 | - T2D risk | Body    |
| cg01776199 | SRPK2   | chr7  | 0.212838347 | - T2D risk | Body    |
| cg26289568 | RET     | chr10 | 0.212923741 | + T2D risk | Body    |
| cg27163167 | SPAG9   | chr17 | 0.212970061 | + T2D risk | Body    |
| cg08030560 | PRKCE   | chr2  | 0.21300193  | - T2D risk | Body    |
| cg15389595 | PACS1   | chr11 | 0.213075699 | + T2D risk | Body    |
| cg04895233 | PLAGL1  | chr6  | 0.21317176  | - T2D risk | TSS1500 |
| cg08549692 | TJP1    | chr15 | 0.213200962 | - T2D risk | Body    |
| cg02752727 | SLC30A8 | chr8  | 0.213357504 | - T2D risk | TSS200  |
| cg02752727 | SLC30A8 | chr8  | 0.213357504 | - T2D risk | 5'UTR   |
| cg08013143 | NOTCH3  | chr19 | 0.213364789 | + T2D risk | Body    |
| cg04900366 | PRKAG2  | chr7  | 0.213385467 | - T2D risk | Body    |
| cg16151354 | DACH1   | chr13 | 0.213496513 | + T2D risk | Body    |
| cg20709200 | PRKCE   | chr2  | 0.213498376 | - T2D risk | 1stExon |
| cg03150319 | CREBBP  | chr16 | 0.213887665 | + T2D risk | Body    |
| cg02307378 | TPCN1   | chr12 | 0.213918162 | + T2D risk | Body    |
| cg13749777 | TMEM59  | chr1  | 0.213957072 | + T2D risk | TSS1500 |
| cg15119735 | SCAF11  | chr12 | 0.213975624 | - T2D risk | Body    |
| cg10834070 | TBC1D5  | chr3  | 0.213994993 | - T2D risk | Body    |
| cg26544559 | RBM4    | chr11 | 0.214077874 | - T2D risk | Body    |
| cg16594495 | PHACTR1 | chr6  | 0.214095461 | + T2D risk | Body    |
| cg09605467 | ARL8B   | chr3  | 0.214130538 | + T2D risk | Body    |
| cg24599943 | MDM1    | chr12 | 0.214193578 | - T2D risk | 3'UTR   |
| cg24599943 | MDM1    | chr12 | 0.214193578 | - T2D risk | Body    |
| cg12872398 | KDM4B   | chr19 | 0.214236917 | - T2D risk | Body    |
| cg01878356 | KDM4B   | chr19 | 0.214268594 | + T2D risk | 5'UTR   |



|            |                 |       |             |            |         |
|------------|-----------------|-------|-------------|------------|---------|
| cg08334000 | <i>TTC28</i>    | chr22 | 0.214315793 | + T2D risk | Body    |
| cg17343918 | <i>SSB</i>      | chr2  | 0.214386871 | - T2D risk | 5'UTR   |
| cg17343918 | <i>SSB</i>      | chr2  | 0.214386871 | - T2D risk | ExonBnd |
| cg09915376 | <i>ZHX2</i>     | chr8  | 0.214400839 | - T2D risk | 5'UTR   |
| cg11672159 | <i>RSF1</i>     | chr11 | 0.214411458 | - T2D risk | 1stExon |
| cg11672159 | <i>RSF1</i>     | chr11 | 0.214411458 | - T2D risk | 5'UTR   |
| cg11782515 | <i>KDM4B</i>    | chr19 | 0.214474802 | + T2D risk | 5'UTR   |
| cg11005943 | <i>KCNJ12</i>   | chr17 | 0.214489552 | + T2D risk | Body    |
| cg10593480 | <i>EIF1AY</i>   | chrY  | 0.214518534 | - T2D risk | Body    |
| cg18694755 | <i>ITPKB</i>    | chr1  | 0.214617893 | + T2D risk | Body    |
| cg25986804 | <i>NCOA2</i>    | chr8  | 0.214686762 | - T2D risk | 5'UTR   |
| cg16979355 | <i>NOL4</i>     | chr18 | 0.214826321 | - T2D risk | 5'UTR   |
| cg16979355 | <i>NOL4</i>     | chr18 | 0.214826321 | - T2D risk | Body    |
| cg24445641 | <i>ULK4</i>     | chr3  | 0.214827261 | - T2D risk | Body    |
| cg07420274 | <i>GAD1</i>     | chr2  | 0.214848838 | + T2D risk | Body    |
| cg03418847 | <i>FBXL2</i>    | chr3  | 0.214907356 | - T2D risk | Body    |
| cg11757033 | <i>WIZ</i>      | chr19 | 0.214925886 | - T2D risk | Body    |
| cg12150041 | <i>ARHGAP32</i> | chr11 | 0.215002007 | - T2D risk | Body    |
| cg10910267 | <i>TANC2</i>    | chr17 | 0.215062389 | - T2D risk | TSS1500 |
| cg09441736 | <i>CUX1</i>     | chr7  | 0.215315661 | + T2D risk | Body    |
| cg23062425 | <i>ITGA1</i>    | chr5  | 0.215563555 | - T2D risk | TSS200  |
| cg06306674 | <i>TANC2</i>    | chr17 | 0.215695395 | + T2D risk | Body    |
| cg25860737 | <i>GALK2</i>    | chr15 | 0.215700456 | + T2D risk | Body    |
| cg25860737 | <i>GALK2</i>    | chr15 | 0.215700456 | + T2D risk | TSS1500 |
| cg04783508 | <i>DIP2C</i>    | chr10 | 0.215734274 | - T2D risk | Body    |
| cg02770054 | <i>ATP4A</i>    | chr19 | 0.216135207 | - T2D risk | Body    |
| cg25802535 | <i>MAN1A2</i>   | chr1  | 0.216157048 | + T2D risk | Body    |
| cg25079492 | <i>CLEC16A</i>  | chr16 | 0.216174362 | - T2D risk | Body    |
| cg17841456 | <i>RGS7</i>     | chr1  | 0.21622104  | - T2D risk | Body    |
| cg04449354 | <i>PLEKHG3</i>  | chr14 | 0.216524433 | - T2D risk | Body    |
| cg14930864 | <i>YWHAQ</i>    | chr2  | 0.216595988 | - T2D risk | Body    |
| cg01372618 | <i>PRKAG2</i>   | chr7  | 0.216863572 | - T2D risk | Body    |
| cg03721064 | <i>DDC</i>      | chr7  | 0.216941228 | - T2D risk | Body    |
| cg07716110 | <i>NCOR1</i>    | chr17 | 0.216984199 | - T2D risk | Body    |
| cg24477583 | <i>CMTR1</i>    | chr6  | 0.217021912 | - T2D risk | ExonBnd |
| cg24477583 | <i>CMTR1</i>    | chr6  | 0.217021912 | - T2D risk | Body    |
| cg16391321 | <i>TSGA10</i>   | chr2  | 0.217105687 | + T2D risk | 5'UTR   |
| cg06933137 | <i>PACRG</i>    | chr6  | 0.217114086 | - T2D risk | Body    |
| cg04465049 | <i>NPEPPS</i>   | chr17 | 0.21726485  | + T2D risk | Body    |
| cg06697448 | <i>LMCD1</i>    | chr3  | 0.217355443 | + T2D risk | Body    |
| cg25797865 | <i>CDK8</i>     | chr13 | 0.217592251 | + T2D risk | Body    |
| cg25195309 | <i>ENAH</i>     | chr1  | 0.217669348 | + T2D risk | Body    |
| cg00700008 | <i>USP53</i>    | chr4  | 0.217696801 | - T2D risk | 5'UTR   |
| cg09999998 | <i>SEZ6L</i>    | chr22 | 0.217737763 | + T2D risk | Body    |
| cg25830094 | <i>ASH1L</i>    | chr1  | 0.217758042 | - T2D risk | TSS200  |
| cg21368511 | <i>RSF1</i>     | chr11 | 0.217768376 | + T2D risk | Body    |
| cg18542050 | <i>ATP2B1</i>   | chr12 | 0.21777064  | + T2D risk | Body    |
| cg23954193 | <i>STX6</i>     | chr1  | 0.217838084 | - T2D risk | Body    |
| cg25067242 | <i>NGF</i>      | chr1  | 0.217859325 | - T2D risk | TSS1500 |
| cg02105817 | <i>DYNC1I2</i>  | chr2  | 0.217865754 | + T2D risk | 5'UTR   |
| cg13014457 | <i>CADM1</i>    | chr11 | 0.217906475 | - T2D risk | Body    |
| cg24305421 | <i>SLC30A8</i>  | chr8  | 0.217976527 | - T2D risk | 5'UTR   |
| cg05033322 | <i>NPAT</i>     | chr11 | 0.218119623 | - T2D risk | 1stExon |
| cg13210567 | <i>DIP2C</i>    | chr10 | 0.218126874 | - T2D risk | Body    |
| cg02324676 | <i>PRKAG2</i>   | chr7  | 0.218154187 | - T2D risk | Body    |
| cg02747390 | <i>SRPK2</i>    | chr7  | 0.218168971 | + T2D risk | Body    |
| cg19807968 | <i>SLC7A2</i>   | chr8  | 0.218185181 | + T2D risk | TSS200  |
| cg19807968 | <i>SLC7A2</i>   | chr8  | 0.218185181 | + T2D risk | 5'UTR   |
| cg18558455 | <i>CUX1</i>     | chr7  | 0.218203862 | - T2D risk | Body    |
| cg17160687 | <i>UXS1</i>     | chr2  | 0.218247941 | + T2D risk | Body    |
| cg10578504 | <i>SLC30A8</i>  | chr8  | 0.218315997 | + T2D risk | 5'UTR   |
| cg10578504 | <i>SLC30A8</i>  | chr8  | 0.218315997 | + T2D risk | TSS1500 |
| cg10320783 | <i>CADM1</i>    | chr11 | 0.218367238 | - T2D risk | Body    |
| cg16381371 | <i>KREMEN1</i>  | chr22 | 0.218459443 | - T2D risk | Body    |
| cg08863440 | <i>GAD1</i>     | chr2  | 0.218483207 | + T2D risk | Body    |
| cg17908389 | <i>PICALM</i>   | chr11 | 0.218621499 | + T2D risk | ExonBnd |
| cg17908389 | <i>PICALM</i>   | chr11 | 0.218621499 | + T2D risk | Body    |
| cg14015156 | <i>GRK5</i>     | chr10 | 0.21871989  | + T2D risk | Body    |
| cg13433214 | <i>PRKACB</i>   | chr1  | 0.218750259 | + T2D risk | Body    |
| cg13433214 | <i>PRKACB</i>   | chr1  | 0.218750259 | + T2D risk | TSS200  |



|            |          |       |             |            |         |
|------------|----------|-------|-------------|------------|---------|
| cg11105563 | DIP2C    | chr10 | 0.218822547 | - T2D risk | Body    |
| cg13810766 | PRKAG2   | chr7  | 0.218898755 | + T2D risk | Body    |
| cg20368567 | NF1      | chr17 | 0.218948641 | + T2D risk | Body    |
| cg03825370 | APBA1    | chr9  | 0.219031429 | + T2D risk | TSS1500 |
| cg21462724 | RAP1GAP2 | chr17 | 0.219120194 | - T2D risk | Body    |
| cg00552490 | UXS1     | chr2  | 0.219135431 | + T2D risk | Body    |
| cg14413887 | ARID2    | chr12 | 0.219161008 | - T2D risk | Body    |
| cg05229655 | NOL4     | chr18 | 0.219161349 | - T2D risk | Body    |
| cg15959113 | TENM2    | chr5  | 0.219169667 | - T2D risk | Body    |
| cg11768925 | PRKACB   | chr1  | 0.219189688 | - T2D risk | Body    |
| cg11768925 | PRKACB   | chr1  | 0.219189688 | - T2D risk | TSS1500 |
| cg22326973 | UBE2K    | chr4  | 0.219340014 | + T2D risk | Body    |
| cg26688665 | SCAF8    | chr6  | 0.21936086  | - T2D risk | Body    |
| cg22080435 | CRYL1    | chr13 | 0.219385249 | + T2D risk | TSS200  |
| cg08894980 | CUX2     | chr12 | 0.21939771  | - T2D risk | Body    |
| cg03888365 | ZHX2     | chr8  | 0.21941153  | + T2D risk | TSS1500 |
| cg14846425 | SMG7     | chr1  | 0.219560157 | + T2D risk | Body    |
| cg06858773 | DACH1    | chr13 | 0.219675713 | - T2D risk | Body    |
| cg09909601 | INPP4A   | chr2  | 0.219705397 | - T2D risk | 5'UTR   |
| cg27228042 | FAM160A1 | chr4  | 0.220081546 | - T2D risk | 5'UTR   |
| cg14739284 | CNTNAP2  | chr7  | 0.220097611 | - T2D risk | Body    |
| cg23364632 | PHACTR1  | chr6  | 0.220108148 | + T2D risk | Body    |
| cg20983178 | TENM2    | chr5  | 0.220233797 | + T2D risk | Body    |
| cg23838527 | ATXN1    | chr6  | 0.220277132 | + T2D risk | 5'UTR   |
| cg18328894 | CPLX2    | chr5  | 0.220394122 | - T2D risk | 5'UTR   |
| cg23031705 | TTC28    | chr22 | 0.220424598 | + T2D risk | Body    |
| cg13293126 | CPLX2    | chr5  | 0.220441995 | + T2D risk | 5'UTR   |
| cg24239882 | ST8SIA1  | chr12 | 0.220447718 | - T2D risk | TSS1500 |
| cg00113208 | CUL1     | chr7  | 0.22055674  | + T2D risk | TSS1500 |
| cg03132727 | STX6     | chr1  | 0.220598453 | - T2D risk | Body    |
| cg00782811 | RCAN2    | chr6  | 0.22070299  | + T2D risk | TSS1500 |
| cg04030141 | ATXN1    | chr6  | 0.220742285 | + T2D risk | 5'UTR   |
| cg05130386 | CLASP2   | chr3  | 0.220807872 | - T2D risk | Body    |
| cg19952216 | CRYL1    | chr13 | 0.220930952 | - T2D risk | Body    |
| cg19087217 | CADM1    | chr11 | 0.220945595 | - T2D risk | Body    |
| cg10037027 | SSB      | chr2  | 0.22100183  | + T2D risk | 1stExon |
| cg10037027 | SSB      | chr2  | 0.22100183  | + T2D risk | 5'UTR   |
| cg22928999 | FBXO11   | chr2  | 0.221101376 | + T2D risk | Body    |
| cg16893488 | NCOA2    | chr8  | 0.22115742  | + T2D risk | 5'UTR   |
| cg22202558 | CUX1     | chr7  | 0.221274683 | + T2D risk | Body    |
| cg07479001 | BCAT1    | chr12 | 0.221445292 | + T2D risk | Body    |
| cg06150819 | ARPP19   | chr15 | 0.221496508 | + T2D risk | 5'UTR   |
| cg06150819 | ARPP19   | chr15 | 0.221496508 | + T2D risk | 1stExon |
| cg06150819 | ARPP19   | chr15 | 0.221496508 | + T2D risk | TSS200  |
| cg12983550 | SEZ6L    | chr22 | 0.221599941 | + T2D risk | Body    |
| cg23814223 | COL4A1   | chr13 | 0.221606605 | + T2D risk | Body    |
| cg19330292 | POC1B    | chr12 | 0.221619057 | - T2D risk | Body    |
| cg19330292 | POC1B    | chr12 | 0.221619057 | - T2D risk | 5'UTR   |
| cg17843143 | IFT74    | chr9  | 0.221625027 | - T2D risk | TSS1500 |
| cg08692211 | MEIS2    | chr15 | 0.221656009 | + T2D risk | Body    |
| cg18857021 | ARL15    | chr5  | 0.2217243   | - T2D risk | TSS1500 |
| cg08980987 | BCAT1    | chr12 | 0.221883361 | + T2D risk | Body    |
| cg26641425 | CMTR1    | chr6  | 0.222005919 | - T2D risk | Body    |
| cg06431586 | KIAA0355 | chr19 | 0.222038918 | - T2D risk | TSS200  |
| cg20191365 | NOL4     | chr18 | 0.222263363 | + T2D risk | 5'UTR   |
| cg20191365 | NOL4     | chr18 | 0.222263363 | + T2D risk | Body    |
| cg00702231 | PLAGL1   | chr6  | 0.222270377 | + T2D risk | 5'UTR   |
| cg00702231 | PLAGL1   | chr6  | 0.222270377 | + T2D risk | 1stExon |
| cg18080303 | LAMA4    | chr6  | 0.222276411 | - T2D risk | TSS1500 |
| cg19989141 | ST6GAL1  | chr3  | 0.222308636 | - T2D risk | 5'UTR   |
| cg24123860 | TENM2    | chr5  | 0.222506332 | + T2D risk | Body    |
| cg04932802 | MGRN1    | chr16 | 0.222564671 | - T2D risk | Body    |
| cg16311613 | PACS1    | chr11 | 0.222596841 | - T2D risk | Body    |
| cg03432172 | CUX1     | chr7  | 0.222598267 | - T2D risk | Body    |
| cg15446032 | AGPAT3   | chr21 | 0.222738446 | - T2D risk | 5'UTR   |
| cg15446032 | AGPAT3   | chr21 | 0.222738446 | - T2D risk | TSS1500 |
| cg17889682 | DYNC111  | chr7  | 0.22277549  | + T2D risk | 5'UTR   |
| cg27291710 | NGF      | chr1  | 0.222921286 | + T2D risk | 5'UTR   |
| cg05322822 | INPP4A   | chr2  | 0.223058814 | - T2D risk | TSS1500 |
| cg10799249 | DIP2C    | chr10 | 0.223180063 | + T2D risk | Body    |



|               |                 |       |             |            |         |
|---------------|-----------------|-------|-------------|------------|---------|
| cg06626733    | <i>RAP1GAP2</i> | chr17 | 0.223231543 | + T2D risk | Body    |
| cg14485156    | <i>RSF1</i>     | chr11 | 0.223249848 | - T2D risk | Body    |
| cg21211144    | <i>NCOR1</i>    | chr17 | 0.223350324 | + T2D risk | TSS200  |
| cg15012864    | <i>ITPKB</i>    | chr1  | 0.223485548 | - T2D risk | Body    |
| cg05609864    | <i>RBBP6</i>    | chr16 | 0.223496036 | + T2D risk | TSS1500 |
| cg08953938    | <i>RTN4</i>     | chr2  | 0.223641798 | - T2D risk | Body    |
| cg05038241    | <i>GRK5</i>     | chr10 | 0.223690669 | + T2D risk | Body    |
| cg15565593    | <i>GLG1</i>     | chr16 | 0.223736504 | - T2D risk | Body    |
| cg15827752    | <i>LMX1B</i>    | chr9  | 0.22398918  | + T2D risk | Body    |
| cg15070945    | <i>MTHFS</i>    | chr15 | 0.224113758 | - T2D risk | Body    |
| cg03846063    | <i>PRKCE</i>    | chr2  | 0.22434484  | - T2D risk | Body    |
| cg25225968    | <i>LMCD1</i>    | chr3  | 0.22435819  | + T2D risk | TSS1500 |
| cg11454606    | <i>CHKA</i>     | chr11 | 0.224389162 | - T2D risk | TSS200  |
| cg10481617    | <i>PHACTR1</i>  | chr6  | 0.224595388 | + T2D risk | Body    |
| cg02129643    | <i>KDR</i>      | chr4  | 0.224639644 | - T2D risk | Body    |
| cg27484945    | <i>WIZ</i>      | chr19 | 0.224724065 | + T2D risk | TSS1500 |
| cg04630908    | <i>DIP2C</i>    | chr10 | 0.22502295  | + T2D risk | 3'UTR   |
| cg15635472    | <i>TPCN1</i>    | chr12 | 0.225190405 | - T2D risk | 5'UTR   |
| cg15635472    | <i>TPCN1</i>    | chr12 | 0.225190405 | - T2D risk | 1stExon |
| cg03434319    | <i>PRKCB</i>    | chr16 | 0.225239832 | + T2D risk | Body    |
| cg03109553    | <i>ATRNL1</i>   | chr10 | 0.22524422  | - T2D risk | Body    |
| cg11687389    | <i>PHACTR1</i>  | chr6  | 0.225262593 | + T2D risk | Body    |
| cg18314121    | <i>ENAH</i>     | chr1  | 0.225374532 | + T2D risk | Body    |
| cg05308829    | <i>GNA12</i>    | chr7  | 0.225547919 | - T2D risk | Body    |
| cg03247739    | <i>CREBBP</i>   | chr16 | 0.225550863 | + T2D risk | Body    |
| cg20674067    | <i>SEZ6L</i>    | chr22 | 0.225551717 | + T2D risk | Body    |
| cg03097819    | <i>PRKAG2</i>   | chr7  | 0.22558712  | + T2D risk | Body    |
| cg24503966    | <i>NOL4</i>     | chr18 | 0.225679028 | - T2D risk | TSS1500 |
| cg24503966    | <i>NOL4</i>     | chr18 | 0.225679028 | - T2D risk | TSS200  |
| cg07932921    | <i>DLL4</i>     | chr15 | 0.22574951  | - T2D risk | TSS200  |
| cg05782976    | <i>WWP2</i>     | chr16 | 0.225837922 | - T2D risk | Body    |
| cg02263703    | <i>PRKCE</i>    | chr2  | 0.225898358 | + T2D risk | Body    |
| cg26843612    | <i>ATXN1</i>    | chr6  | 0.225981613 | - T2D risk | 5'UTR   |
| cg16218074    | <i>RCAN2</i>    | chr6  | 0.226044884 | + T2D risk | Body    |
| cg26083045    | <i>LMCD1</i>    | chr3  | 0.22614763  | + T2D risk | Body    |
| cg23883807    | <i>ATXN1</i>    | chr6  | 0.226183457 | + T2D risk | 5'UTR   |
| cg18414253    | <i>ANK2</i>     | chr4  | 0.226269072 | - T2D risk | Body    |
| cg10684297    | <i>TBC1D5</i>   | chr3  | 0.226310905 | - T2D risk | 5'UTR   |
| cg03177729    | <i>SEC31A</i>   | chr4  | 0.22634142  | + T2D risk | 5'UTR   |
| cg07031665    | <i>RSF1</i>     | chr11 | 0.226359068 | + T2D risk | TSS1500 |
| cg14998312    | <i>ARL15</i>    | chr5  | 0.226434571 | - T2D risk | Body    |
| cg13271643    | <i>CRYL1</i>    | chr13 | 0.226461179 | - T2D risk | Body    |
| cg14957660    | <i>DIP2C</i>    | chr10 | 0.22654434  | - T2D risk | Body    |
| cg23351327    | <i>PRKAG2</i>   | chr7  | 0.22663102  | + T2D risk | Body    |
| cg22355498    | <i>SRPK2</i>    | chr7  | 0.226676683 | + T2D risk | Body    |
| cg22355498    | <i>SRPK2</i>    | chr7  | 0.226676683 | + T2D risk | 5'UTR   |
| cg21105876    | <i>DIP2C</i>    | chr10 | 0.226793722 | - T2D risk | Body    |
| cg07604514    | <i>MDM1</i>     | chr12 | 0.226848153 | - T2D risk | Body    |
| cg16592149    | <i>PDLIM5</i>   | chr4  | 0.22707986  | + T2D risk | Body    |
| cg05673731    | <i>PTPRU</i>    | chr1  | 0.227347128 | + T2D risk | Body    |
| ch.4.2917740F | <i>FNIP2</i>    | chr4  | 0.227398558 | + T2D risk | Body    |
| cg00584106    | <i>ANK2</i>     | chr4  | 0.227572815 | + T2D risk | Body    |
| cg17659271    | <i>SLC29A4</i>  | chr7  | 0.227582372 | - T2D risk | Body    |
| cg07029277    | <i>TSC22D1</i>  | chr13 | 0.227635633 | + T2D risk | 1stExon |
| cg07029277    | <i>TSC22D1</i>  | chr13 | 0.227635633 | + T2D risk | 5'UTR   |
| cg23465749    | <i>ARID2</i>    | chr12 | 0.227655161 | - T2D risk | TSS200  |
| cg23485716    | <i>DIP2C</i>    | chr10 | 0.227698369 | + T2D risk | Body    |
| cg00644447    | <i>DIP2C</i>    | chr10 | 0.22771676  | - T2D risk | Body    |
| cg01151886    | <i>PRKAG2</i>   | chr7  | 0.227840526 | + T2D risk | Body    |
| cg00605763    | <i>DLL4</i>     | chr15 | 0.227896354 | + T2D risk | Body    |
| ch.1.3587792F | <i>SMG7</i>     | chr1  | 0.228105606 | + T2D risk | Body    |
| cg15507440    | <i>PDE3A</i>    | chr12 | 0.228247478 | + T2D risk | TSS200  |
| cg22438356    | <i>PACS1</i>    | chr11 | 0.228301457 | + T2D risk | Body    |
| cg27632318    | <i>RGS7</i>     | chr1  | 0.228323733 | + T2D risk | Body    |
| cg24723476    | <i>DIP2C</i>    | chr10 | 0.228343344 | + T2D risk | Body    |
| cg01973676    | <i>CUX1</i>     | chr7  | 0.228362277 | + T2D risk | Body    |
| cg07124173    | <i>EIF4EBP3</i> | chr5  | 0.228378529 | - T2D risk | TSS200  |
| cg18906283    | <i>UBE2K</i>    | chr4  | 0.228632458 | - T2D risk | Body    |
| cg09525324    | <i>PDLIM5</i>   | chr4  | 0.228673034 | - T2D risk | TSS200  |
| cg13784237    | <i>KCNIP3</i>   | chr2  | 0.228681998 | - T2D risk | Body    |



|            |          |       |             |            |         |
|------------|----------|-------|-------------|------------|---------|
| cg02433905 | ATP6V1A  | chr3  | 0.22872702  | - T2D risk | TSS1500 |
| cg17446199 | KDM4B    | chr19 | 0.22873868  | + T2D risk | 5'UTR   |
| cg21283302 | CUX1     | chr7  | 0.228749611 | + T2D risk | Body    |
| cg22534967 | RHOA     | chr3  | 0.228853906 | - T2D risk | TSS200  |
| cg26368594 | ANK3     | chr10 | 0.228855696 | + T2D risk | Body    |
| cg23401436 | HNRNP2B1 | chr7  | 0.228864264 | - T2D risk | 3'UTR   |
| cg19484260 | ACTN4    | chr19 | 0.228991349 | - T2D risk | Body    |
| cg00095626 | GNA12    | chr7  | 0.229040665 | - T2D risk | Body    |
| cg16865135 | RTN4     | chr2  | 0.229266847 | + T2D risk | TSS1500 |
| cg16865135 | RTN4     | chr2  | 0.229266847 | + T2D risk | Body    |
| cg17254176 | PRKAG2   | chr7  | 0.229274033 | - T2D risk | Body    |
| cg04770940 | ARHGAP32 | chr11 | 0.22932292  | - T2D risk | Body    |
| cg04502704 | DDHD2    | chr8  | 0.229514469 | - T2D risk | Body    |
| cg22886643 | FNIP2    | chr4  | 0.229749926 | + T2D risk | Body    |
| cg02712585 | KDM4B    | chr19 | 0.229771847 | + T2D risk | Body    |
| cg23132302 | RAP1GAP2 | chr17 | 0.22978677  | - T2D risk | Body    |
| cg02810494 | CLEC16A  | chr16 | 0.229790064 | - T2D risk | Body    |
| cg09600585 | CDH22    | chr20 | 0.229865217 | - T2D risk | 5'UTR   |
| cg04655520 | CALD1    | chr7  | 0.22989838  | - T2D risk | 1stExon |
| cg04655520 | CALD1    | chr7  | 0.22989838  | - T2D risk | Body    |
| cg04655520 | CALD1    | chr7  | 0.22989838  | - T2D risk | 5'UTR   |
| cg08674349 | PACRG    | chr6  | 0.229919645 | - T2D risk | Body    |
| cg01500851 | RHOQ     | chr2  | 0.229987209 | + T2D risk | TSS1500 |
| cg23371754 | ANK2     | chr4  | 0.230077774 | + T2D risk | Body    |
| cg13360249 | ARL15    | chr5  | 0.230083482 | - T2D risk | Body    |
| cg02889558 | CLEC16A  | chr16 | 0.230114624 | + T2D risk | 3'UTR   |
| cg06089298 | SCAF8    | chr6  | 0.230127381 | - T2D risk | Body    |
| cg22639895 | KCNJ12   | chr17 | 0.230135978 | + T2D risk | TSS200  |
| cg20818806 | COL4A1   | chr13 | 0.230521059 | - T2D risk | Body    |
| cg10505247 | PFKFB2   | chr1  | 0.230618765 | + T2D risk | TSS200  |
| cg09304293 | PACRG    | chr6  | 0.230619478 | - T2D risk | Body    |
| cg17286640 | KDR      | chr4  | 0.230620446 | - T2D risk | Body    |
| cg01900788 | PACS2    | chr14 | 0.23063253  | + T2D risk | Body    |
| cg18399451 | ATXN1    | chr6  | 0.230817816 | + T2D risk | 5'UTR   |
| cg11566894 | ACTN4    | chr19 | 0.230930594 | + T2D risk | Body    |
| cg09454524 | PRKCE    | chr2  | 0.230932217 | + T2D risk | Body    |
| cg11804248 | GALK2    | chr15 | 0.230965596 | + T2D risk | TSS200  |
| cg17836487 | TMEM131  | chr2  | 0.231001541 | + T2D risk | Body    |
| cg13785200 | RAP1GAP2 | chr17 | 0.23105183  | + T2D risk | Body    |
| cg01766077 | ARL15    | chr5  | 0.231369737 | - T2D risk | Body    |
| cg10252135 | PDE7A    | chr8  | 0.23138289  | - T2D risk | TSS1500 |
| cg01615815 | CNTNAP2  | chr7  | 0.231480408 | - T2D risk | Body    |
| cg05265414 | COL4A1   | chr13 | 0.23161416  | + T2D risk | Body    |
| cg11239445 | CALD1    | chr7  | 0.231627806 | + T2D risk | Body    |
| cg27172310 | ATP6V1A  | chr3  | 0.231631316 | - T2D risk | 5'UTR   |
| cg18239942 | PACS2    | chr14 | 0.231640655 | + T2D risk | Body    |
| cg09767960 | CUL1     | chr7  | 0.231645009 | - T2D risk | Body    |
| cg11653336 | CHFR     | chr12 | 0.231688752 | + T2D risk | TSS1500 |
| cg02867373 | ITPKB    | chr1  | 0.23175582  | + T2D risk | Body    |
| cg25706530 | NOL4     | chr18 | 0.231760735 | + T2D risk | Body    |
| cg25706530 | NOL4     | chr18 | 0.231760735 | + T2D risk | TSS200  |
| cg13980808 | BCAT1    | chr12 | 0.231825754 | - T2D risk | Body    |
| cg12634271 | MEIS2    | chr15 | 0.23188849  | - T2D risk | 3'UTR   |
| cg12634271 | MEIS2    | chr15 | 0.23188849  | - T2D risk | Body    |
| cg18105702 | CUX2     | chr12 | 0.231946218 | + T2D risk | Body    |
| cg04807239 | ANK2     | chr4  | 0.232009318 | - T2D risk | Body    |
| cg18630348 | PACRG    | chr6  | 0.232044243 | - T2D risk | Body    |
| cg14936601 | CUX1     | chr7  | 0.232065774 | - T2D risk | Body    |
| cg26276369 | PRKAG2   | chr7  | 0.232093098 | - T2D risk | 5'UTR   |
| cg26276369 | PRKAG2   | chr7  | 0.232093098 | - T2D risk | 1stExon |
| cg26276369 | PRKAG2   | chr7  | 0.232093098 | - T2D risk | Body    |
| cg04017584 | CUX1     | chr7  | 0.232324747 | + T2D risk | 3'UTR   |
| cg04017584 | CUX1     | chr7  | 0.232324747 | + T2D risk | Body    |
| cg24357619 | MEIS2    | chr15 | 0.232371334 | + T2D risk | Body    |
| cg27444700 | KIAA1217 | chr10 | 0.232478665 | - T2D risk | Body    |
| cg24040299 | PACS2    | chr14 | 0.232598515 | + T2D risk | Body    |
| cg05989951 | AGPAT3   | chr21 | 0.232627822 | + T2D risk | 5'UTR   |
| cg05989951 | AGPAT3   | chr21 | 0.232627822 | + T2D risk | ExonBnd |
| cg18923228 | CREBBP   | chr16 | 0.232768866 | - T2D risk | Body    |
| cg14656131 | UNC80    | chr2  | 0.232823954 | - T2D risk | TSS200  |



|            |                 |       |             |            |         |
|------------|-----------------|-------|-------------|------------|---------|
| cg00727112 | <i>FNIP2</i>    | chr4  | 0.232845022 | + T2D risk | 1stExon |
| cg22935319 | <i>TOP2A</i>    | chr17 | 0.232919887 | - T2D risk | 3'UTR   |
| cg13849378 | <i>RGS7</i>     | chr1  | 0.232941802 | - T2D risk | 1stExon |
| cg13849378 | <i>RGS7</i>     | chr1  | 0.232941802 | - T2D risk | 5'UTR   |
| cg07101082 | <i>NCOA2</i>    | chr8  | 0.233077789 | - T2D risk | Body    |
| cg21287519 | <i>SGSM2</i>    | chr17 | 0.233163388 | + T2D risk | Body    |
| cg00746693 | <i>KIAA0355</i> | chr19 | 0.233170002 | - T2D risk | 5'UTR   |
| cg18970103 | <i>CNTNAP2</i>  | chr7  | 0.233289988 | - T2D risk | Body    |
| cg08539841 | <i>KIAA1217</i> | chr10 | 0.233326126 | - T2D risk | TSS200  |
| cg07293993 | <i>MTHFS</i>    | chr15 | 0.233364144 | + T2D risk | Body    |
| cg17808132 | <i>PPP1R12A</i> | chr12 | 0.233384432 | + T2D risk | Body    |
| cg14916924 | <i>LMX1B</i>    | chr9  | 0.233388466 | + T2D risk | Body    |
| cg12607378 | <i>SLIT3</i>    | chr5  | 0.233427015 | - T2D risk | Body    |
| cg18324798 | <i>DNAH9</i>    | chr17 | 0.233428078 | - T2D risk | 1stExon |
| cg01914991 | <i>DNAJC13</i>  | chr3  | 0.233466455 | - T2D risk | TSS1500 |
| cg13564889 | <i>CPLX2</i>    | chr5  | 0.233528262 | - T2D risk | 5'UTR   |
| cg14378798 | <i>LMX1B</i>    | chr9  | 0.233683375 | + T2D risk | Body    |
| cg18764438 | <i>SNX4</i>     | chr3  | 0.233741617 | + T2D risk | Body    |
| cg04678096 | <i>GALK2</i>    | chr15 | 0.233888536 | - T2D risk | Body    |
| cg13759778 | <i>NF1</i>      | chr17 | 0.234007699 | + T2D risk | Body    |
| cg00205501 | <i>PRKCE</i>    | chr2  | 0.234055458 | + T2D risk | Body    |
| cg05727605 | <i>MET</i>      | chr7  | 0.234137864 | - T2D risk | Body    |
| cg21315874 | <i>ST20</i>     | chr15 | 0.234300746 | + T2D risk | 5'UTR   |
| cg11416338 | <i>PDE3A</i>    | chr12 | 0.234314088 | + T2D risk | 1stExon |
| cg20634940 | <i>DIP2C</i>    | chr10 | 0.234322905 | + T2D risk | Body    |
| cg25050951 | <i>TJP1</i>     | chr15 | 0.234323524 | - T2D risk | TSS1500 |
| cg08526412 | <i>TMEM59</i>   | chr1  | 0.234377362 | - T2D risk | TSS1500 |
| cg16901821 | <i>TMEM131</i>  | chr2  | 0.234447074 | + T2D risk | Body    |
| cg02693745 | <i>ATRN</i>     | chr20 | 0.234593282 | + T2D risk | TSS1500 |
| cg12511023 | <i>PACS1</i>    | chr11 | 0.234715558 | + T2D risk | Body    |
| cg06649805 | <i>RGS7</i>     | chr1  | 0.234818302 | - T2D risk | Body    |
| cg14670266 | <i>INPP4A</i>   | chr2  | 0.234935174 | + T2D risk | 5'UTR   |
| cg01609612 | <i>ATXN1</i>    | chr6  | 0.234939695 | + T2D risk | 5'UTR   |
| cg19821840 | <i>CLASP2</i>   | chr3  | 0.234941704 | - T2D risk | TSS1500 |
| cg24255115 | <i>TJP1</i>     | chr15 | 0.234945727 | - T2D risk | Body    |
| cg11074362 | <i>DENND4C</i>  | chr9  | 0.2349688   | + T2D risk | Body    |
| cg08950508 | <i>PRKACB</i>   | chr1  | 0.235003132 | + T2D risk | Body    |
| cg01803284 | <i>DDC</i>      | chr7  | 0.235067714 | - T2D risk | Body    |
| cg19898425 | <i>PACS2</i>    | chr14 | 0.235077434 | + T2D risk | 5'UTR   |
| cg19898425 | <i>PACS2</i>    | chr14 | 0.235077434 | + T2D risk | Body    |
| cg13978466 | <i>UNC80</i>    | chr2  | 0.235116798 | + T2D risk | Body    |
| cg10747758 | <i>ATRNL1</i>   | chr10 | 0.235137217 | + T2D risk | Body    |
| cg04264638 | <i>CLOCK</i>    | chr4  | 0.235279905 | - T2D risk | 5'UTR   |
| cg14409987 | <i>PRKCE</i>    | chr2  | 0.235347226 | - T2D risk | Body    |
| cg16241421 | <i>CUX2</i>     | chr12 | 0.235776761 | + T2D risk | Body    |
| cg10521786 | <i>PRKCE</i>    | chr2  | 0.235852242 | - T2D risk | Body    |
| cg21637886 | <i>BCAT1</i>    | chr12 | 0.235968003 | + T2D risk | Body    |
| cg01194982 | <i>SLC30A8</i>  | chr8  | 0.236023413 | - T2D risk | 5'UTR   |
| cg01194982 | <i>SLC30A8</i>  | chr8  | 0.236023413 | - T2D risk | 1stExon |
| cg01194982 | <i>SLC30A8</i>  | chr8  | 0.236023413 | - T2D risk | TSS1500 |
| cg12651137 | <i>KCNIP3</i>   | chr2  | 0.236031806 | + T2D risk | Body    |
| cg13280524 | <i>UBE2K</i>    | chr4  | 0.236079835 | + T2D risk | Body    |
| cg06531595 | <i>PDE5A</i>    | chr4  | 0.236173102 | - T2D risk | Body    |
| cg03886752 | <i>TMEM219</i>  | chr16 | 0.236221586 | - T2D risk | 5'UTR   |
| cg07515170 | <i>PPP1R12A</i> | chr12 | 0.236322828 | + T2D risk | TSS1500 |
| cg24284571 | <i>DIP2C</i>    | chr10 | 0.236488319 | + T2D risk | Body    |
| cg18625951 | <i>CNTNAP2</i>  | chr7  | 0.23660529  | - T2D risk | Body    |
| cg23715559 | <i>NUP98</i>    | chr11 | 0.236648511 | + T2D risk | TSS1500 |
| cg14929320 | <i>ARIH1</i>    | chr15 | 0.236672947 | - T2D risk | Body    |
| cg23470864 | <i>EFCAB14</i>  | chr1  | 0.236706234 | + T2D risk | TSS200  |
| cg14407719 | <i>LAP3</i>     | chr4  | 0.236796086 | - T2D risk | Body    |
| cg03668835 | <i>TBC1D5</i>   | chr3  | 0.23679688  | + T2D risk | 5'UTR   |
| cg03668835 | <i>TBC1D5</i>   | chr3  | 0.23679688  | + T2D risk | 1stExon |
| cg17514942 | <i>SUB1</i>     | chr5  | 0.236859188 | - T2D risk | 5'UTR   |
| cg03740159 | <i>SRPK2</i>    | chr7  | 0.23698444  | - T2D risk | TSS200  |
| cg04022888 | <i>ITPKB</i>    | chr1  | 0.237006806 | + T2D risk | Body    |
| cg07473223 | <i>PACS2</i>    | chr14 | 0.237194548 | - T2D risk | Body    |
| cg26749690 | <i>CEP126</i>   | chr11 | 0.237239497 | + T2D risk | Body    |
| cg23563350 | <i>SSBP2</i>    | chr5  | 0.237259598 | + T2D risk | Body    |
| cg13657981 | <i>CALD1</i>    | chr7  | 0.237404147 | - T2D risk | Body    |



|            |          |       |             |            |         |
|------------|----------|-------|-------------|------------|---------|
| cg02784144 | GPC4     | chrX  | 0.237417694 | + T2D risk | Body    |
| cg12808565 | DIP2C    | chr10 | 0.237436772 | - T2D risk | Body    |
| cg03082335 | NCOA2    | chr8  | 0.237438107 | - T2D risk | Body    |
| cg05694499 | AMD1     | chr6  | 0.237620921 | - T2D risk | 5'UTR   |
| cg05694499 | AMD1     | chr6  | 0.237620921 | - T2D risk | Body    |
| cg22549086 | PRKCE    | chr2  | 0.237657126 | + T2D risk | Body    |
| cg00889791 | NCOA7    | chr6  | 0.237784121 | - T2D risk | 5'UTR   |
| cg00889791 | NCOA7    | chr6  | 0.237784121 | - T2D risk | Body    |
| cg26884806 | PACS2    | chr14 | 0.237859974 | + T2D risk | Body    |
| cg06061536 | ULK4     | chr3  | 0.23786931  | + T2D risk | Body    |
| cg10589720 | DACH1    | chr13 | 0.237935664 | - T2D risk | Body    |
| cg01383349 | CREBBP   | chr16 | 0.238270692 | + T2D risk | Body    |
| cg13613280 | NGF      | chr1  | 0.238295476 | + T2D risk | TSS200  |
| cg01012082 | NCOA2    | chr8  | 0.238305978 | + T2D risk | 3'UTR   |
| cg16784366 | LMCD1    | chr3  | 0.238321075 | - T2D risk | Body    |
| cg00499857 | DENND4C  | chr9  | 0.238441161 | + T2D risk | Body    |
| cg00665816 | APBA1    | chr9  | 0.238456995 | - T2D risk | Body    |
| cg24061580 | PRKAG2   | chr7  | 0.238548237 | + T2D risk | 5'UTR   |
| cg24061580 | PRKAG2   | chr7  | 0.238548237 | + T2D risk | 1stExon |
| cg13150071 | CRYL1    | chr13 | 0.238598219 | + T2D risk | Body    |
| cg06665622 | RCAN2    | chr6  | 0.238723614 | - T2D risk | TSS200  |
| cg01191065 | DNAH9    | chr17 | 0.23877823  | - T2D risk | TSS1500 |
| cg01191065 | DNAH9    | chr17 | 0.23877823  | - T2D risk | Body    |
| cg18772376 | ST8SIA1  | chr12 | 0.238886791 | - T2D risk | Body    |
| cg16998466 | SH3GL2   | chr9  | 0.239034467 | - T2D risk | Body    |
| cg02105034 | SMG7     | chr1  | 0.23909929  | + T2D risk | 5'UTR   |
| cg02105034 | SMG7     | chr1  | 0.23909929  | + T2D risk | Body    |
| cg10991406 | PHF21A   | chr11 | 0.239204026 | + T2D risk | Body    |
| cg05970992 | KIAA0232 | chr4  | 0.23920925  | + T2D risk | 5'UTR   |
| cg03567939 | PRKAG2   | chr7  | 0.239277024 | + T2D risk | 5'UTR   |
| cg03567939 | PRKAG2   | chr7  | 0.239277024 | + T2D risk | Body    |
| cg17504397 | TOP2A    | chr17 | 0.239308112 | - T2D risk | TSS1500 |
| cg04569594 | SNX4     | chr3  | 0.239321066 | + T2D risk | Body    |
| cg15625480 | SGSM2    | chr17 | 0.239467738 | + T2D risk | Body    |
| cg18590709 | SPAG9    | chr17 | 0.239469277 | + T2D risk | Body    |
| cg11478105 | SCARB2   | chr4  | 0.239518758 | - T2D risk | Body    |
| cg18205244 | CUX1     | chr7  | 0.239537507 | + T2D risk | Body    |
| cg17773453 | PRKCE    | chr2  | 0.239848313 | - T2D risk | Body    |
| cg00098053 | NCOR1    | chr17 | 0.239857528 | + T2D risk | Body    |
| cg12715421 | DDC      | chr7  | 0.240005291 | + T2D risk | TSS1500 |
| cg12715421 | DDC      | chr7  | 0.240005291 | + T2D risk | 5'UTR   |
| cg04610422 | KIAA1217 | chr10 | 0.240015062 | + T2D risk | 5'UTR   |
| cg00570368 | MYO6     | chr6  | 0.240023899 | - T2D risk | 5'UTR   |
| cg08211120 | CREBBP   | chr16 | 0.24007371  | + T2D risk | Body    |
| cg26147736 | KIAA1217 | chr10 | 0.240169724 | - T2D risk | Body    |
| cg00598235 | LAP3     | chr4  | 0.240235887 | - T2D risk | Body    |
| cg18649198 | PRKAG2   | chr7  | 0.240391632 | - T2D risk | Body    |
| cg02487987 | ITGA1    | chr5  | 0.240528456 | - T2D risk | Body    |
| cg02334521 | DIP2C    | chr10 | 0.240534774 | + T2D risk | Body    |
| cg24874180 | DKK2     | chr4  | 0.240548399 | - T2D risk | Body    |
| cg18772584 | ANK2     | chr4  | 0.240556337 | + T2D risk | Body    |
| cg06461071 | ARL15    | chr5  | 0.240592935 | - T2D risk | Body    |
| cg09729395 | PACRG    | chr6  | 0.240606809 | + T2D risk | Body    |
| cg05642515 | GNA12    | chr7  | 0.240626859 | + T2D risk | Body    |
| cg08777703 | DACH1    | chr13 | 0.240636867 | - T2D risk | Body    |
| cg15104618 | RAP1B    | chr12 | 0.240657319 | - T2D risk | 5'UTR   |
| cg18533833 | CHFR     | chr12 | 0.240660145 | - T2D risk | TSS1500 |
| cg17808901 | WDR48    | chr3  | 0.240692437 | + T2D risk | TSS200  |
| cg25501730 | KDM4B    | chr19 | 0.240754526 | + T2D risk | 5'UTR   |
| cg04048392 | LMX1B    | chr9  | 0.240795214 | + T2D risk | Body    |
| cg25814236 | TENM2    | chr5  | 0.240924449 | + T2D risk | Body    |
| cg02238043 | ATP8A2   | chr13 | 0.241070333 | - T2D risk | Body    |
| cg03670501 | SRPK2    | chr7  | 0.241124542 | - T2D risk | Body    |
| cg18742528 | PHACTR1  | chr6  | 0.241131409 | - T2D risk | Body    |
| cg15808673 | PRKCE    | chr2  | 0.241183176 | - T2D risk | Body    |
| cg09855155 | TENM2    | chr5  | 0.241224354 | + T2D risk | Body    |
| cg00778443 | RSF1     | chr11 | 0.241308314 | - T2D risk | Body    |
| cg18542613 | DACH1    | chr13 | 0.241463598 | - T2D risk | Body    |
| cg12125241 | PDE8A    | chr15 | 0.241480027 | - T2D risk | Body    |
| cg02078598 | INPP4A   | chr2  | 0.241532695 | - T2D risk | Body    |



|            |          |       |             |            |         |
|------------|----------|-------|-------------|------------|---------|
| cg15898192 | CHFR     | chr12 | 0.241552701 | + T2D risk | Body    |
| cg04962621 | MGRN1    | chr16 | 0.241581466 | + T2D risk | Body    |
| cg16080656 | ARL8B    | chr3  | 0.241610409 | - T2D risk | TSS200  |
| cg21332948 | AGPAT3   | chr21 | 0.241694578 | + T2D risk | 5'UTR   |
| cg07033239 | PACS1    | chr11 | 0.241761756 | + T2D risk | Body    |
| cg19344315 | ATXN1    | chr6  | 0.241934385 | - T2D risk | 5'UTR   |
| cg26434332 | CADM1    | chr11 | 0.242078702 | - T2D risk | Body    |
| cg06579558 | NQO1     | chr16 | 0.242091518 | - T2D risk | Body    |
| cg14022656 | COL4A1   | chr13 | 0.242154721 | + T2D risk | Body    |
| cg08012845 | GLG1     | chr16 | 0.242438116 | + T2D risk | 3'UTR   |
| cg08012845 | GLG1     | chr16 | 0.242438116 | + T2D risk | Body    |
| cg26107538 | CNTNAP2  | chr7  | 0.242471297 | + T2D risk | Body    |
| cg26236775 | NCOA7    | chr6  | 0.242494711 | - T2D risk | 5'UTR   |
| cg26236775 | NCOA7    | chr6  | 0.242494711 | - T2D risk | TSS1500 |
| cg27037537 | KANTR    | chrX  | 0.242549248 | + T2D risk | Body    |
| cg17570555 | FAM160A1 | chr4  | 0.242638257 | - T2D risk | Body    |
| cg25412138 | TPCN1    | chr12 | 0.242640013 | - T2D risk | Body    |
| cg14359656 | SPAG9    | chr17 | 0.242647284 | - T2D risk | Body    |
| cg22473770 | NF1      | chr17 | 0.242673427 | - T2D risk | Body    |
| cg00891664 | CDH22    | chr20 | 0.242741072 | - T2D risk | Body    |
| cg14368117 | MEIS2    | chr15 | 0.242766637 | + T2D risk | Body    |
| cg21879740 | SKAP1    | chr17 | 0.242808019 | - T2D risk | Body    |
| cg02144458 | PRKCE    | chr2  | 0.242829725 | + T2D risk | Body    |
| cg14645844 | ZHX2     | chr8  | 0.242831578 | + T2D risk | 5'UTR   |
| cg01423695 | PRKAG2   | chr7  | 0.242848509 | + T2D risk | 5'UTR   |
| cg01423695 | PRKAG2   | chr7  | 0.242848509 | + T2D risk | Body    |
| cg03320208 | TENM2    | chr5  | 0.242874456 | - T2D risk | Body    |
| cg15820610 | KDM4B    | chr19 | 0.242903465 | - T2D risk | Body    |
| cg18236477 | ATP8A2   | chr13 | 0.242924775 | + T2D risk | Body    |
| cg18078795 | KCNIP3   | chr2  | 0.243114721 | + T2D risk | Body    |
| cg00321115 | FLT1     | chr13 | 0.243158453 | + T2D risk | Body    |
| cg00321115 | FLT1     | chr13 | 0.243158453 | + T2D risk | 3'UTR   |
| cg11677960 | NCOR1    | chr17 | 0.243351965 | - T2D risk | Body    |
| cg25401482 | KDM4B    | chr19 | 0.243427844 | + T2D risk | Body    |
| cg19521438 | ATRNL1   | chr10 | 0.243511394 | - T2D risk | Body    |
| cg11323828 | DLL4     | chr15 | 0.24359002  | + T2D risk | 3'UTR   |
| cg02132909 | DYNC111  | chr7  | 0.243632552 | - T2D risk | Body    |
| cg06718419 | POLA1    | chrX  | 0.243704463 | - T2D risk | ExonBnd |
| cg06718419 | POLA1    | chrX  | 0.243704463 | - T2D risk | Body    |
| cg21350153 | KCNIP3   | chr2  | 0.243747226 | + T2D risk | Body    |
| cg05930502 | KDM4B    | chr19 | 0.243757654 | - T2D risk | Body    |
| cg24132146 | PHACTR1  | chr6  | 0.243845671 | + T2D risk | TSS1500 |
| cg21000520 | ROBO2    | chr3  | 0.243974333 | - T2D risk | 5'UTR   |
| cg21000520 | ROBO2    | chr3  | 0.243974333 | - T2D risk | Body    |
| cg13209122 | ITPKB    | chr1  | 0.243977771 | + T2D risk | TSS1500 |
| cg05217312 | KIAA1217 | chr10 | 0.244013698 | - T2D risk | 5'UTR   |
| cg19052870 | PPFIBP1  | chr12 | 0.24405792  | - T2D risk | 5'UTR   |
| cg03773731 | NOTCH3   | chr19 | 0.244081092 | + T2D risk | Body    |
| cg24647724 | DNAH9    | chr17 | 0.244214708 | - T2D risk | Body    |
| cg26633695 | ANKHD1   | chr5  | 0.244215816 | + T2D risk | Body    |
| cg08351088 | ARL8B    | chr3  | 0.244287822 | + T2D risk | Body    |
| cg25336228 | NUF2     | chr1  | 0.24441116  | - T2D risk | TSS1500 |
| cg10711857 | SCARB2   | chr4  | 0.244435985 | - T2D risk | Body    |
| cg12991594 | TENM2    | chr5  | 0.244468943 | + T2D risk | Body    |
| cg21757513 | GRK5     | chr10 | 0.244495671 | + T2D risk | Body    |
| cg13784796 | MEIS2    | chr15 | 0.244528534 | + T2D risk | Body    |
| cg18873911 | NQO1     | chr16 | 0.24455768  | - T2D risk | 5'UTR   |
| cg18873911 | NQO1     | chr16 | 0.24455768  | - T2D risk | 1stExon |
| cg03242869 | KIAA1217 | chr10 | 0.244610729 | + T2D risk | 5'UTR   |
| cg25450986 | TOP2A    | chr17 | 0.244613818 | + T2D risk | TSS200  |
| cg20762590 | PRKD1    | chr14 | 0.244676025 | - T2D risk | Body    |
| cg04920279 | GNA12    | chr7  | 0.244830496 | + T2D risk | Body    |
| cg12978800 | PRKAG2   | chr7  | 0.245032816 | - T2D risk | Body    |
| cg23478225 | PRKCE    | chr2  | 0.245044404 | - T2D risk | Body    |
| cg08056517 | ULK4     | chr3  | 0.245078431 | - T2D risk | Body    |
| cg21078498 | ATRNL1   | chr20 | 0.245091632 | + T2D risk | Body    |
| cg24536624 | NCOA2    | chr8  | 0.245109568 | - T2D risk | Body    |
| cg16031133 | ANKHD1   | chr5  | 0.245152759 | + T2D risk | TSS1500 |
| cg06472636 | SLIT3    | chr5  | 0.245203254 | + T2D risk | Body    |
| cg07407492 | DIP2C    | chr10 | 0.245221694 | - T2D risk | Body    |



|               |          |       |             |            |         |
|---------------|----------|-------|-------------|------------|---------|
| cg25864555    | MAST1    | chr19 | 0.245403405 | - T2D risk | Body    |
| cg12332929    | SLIT3    | chr5  | 0.245461307 | + T2D risk | 3'UTR   |
| cg10154148    | DIP2C    | chr10 | 0.245461657 | + T2D risk | Body    |
| cg03872433    | TPCN1    | chr12 | 0.24551161  | - T2D risk | TSS1500 |
| cg25275410    | ATRN     | chr20 | 0.245717762 | - T2D risk | Body    |
| cg04213163    | ITPKB    | chr1  | 0.246048745 | - T2D risk | Body    |
| cg09031390    | CUX1     | chr7  | 0.246055215 | - T2D risk | Body    |
| cg17201805    | MGRN1    | chr16 | 0.246139506 | - T2D risk | Body    |
| cg15077919    | AMD1     | chr6  | 0.246244684 | + T2D risk | 5'UTR   |
| cg15077919    | AMD1     | chr6  | 0.246244684 | + T2D risk | 1stExon |
| cg21201760    | INPP4A   | chr2  | 0.246293321 | + T2D risk | ExonBnd |
| cg21201760    | INPP4A   | chr2  | 0.246293321 | + T2D risk | Body    |
| cg02477328    | SPAG9    | chr17 | 0.246317625 | + T2D risk | Body    |
| cg08823780    | PRKACB   | chr1  | 0.24634692  | + T2D risk | Body    |
| cg06568361    | RTN4     | chr2  | 0.246426906 | - T2D risk | Body    |
| cg20818337    | RTN4     | chr2  | 0.246516789 | - T2D risk | TSS200  |
| cg03782762    | ARIH1    | chr15 | 0.246549393 | - T2D risk | Body    |
| cg23088023    | GRK5     | chr10 | 0.246551967 | + T2D risk | Body    |
| cg12935882    | WWP2     | chr16 | 0.246626095 | + T2D risk | 1stExon |
| cg12935882    | WWP2     | chr16 | 0.246626095 | + T2D risk | 5'UTR   |
| cg12935882    | WWP2     | chr16 | 0.246626095 | + T2D risk | Body    |
| cg04507925    | UNC80    | chr2  | 0.246709541 | + T2D risk | Body    |
| cg13294594    | MAST1    | chr19 | 0.246792391 | + T2D risk | 1stExon |
| cg08688512    | MEIS2    | chr15 | 0.246838686 | - T2D risk | TSS1500 |
| cg08036955    | COL4A1   | chr13 | 0.246848183 | + T2D risk | Body    |
| cg18165289    | TENM2    | chr5  | 0.246930019 | + T2D risk | Body    |
| cg12939373    | DIP2C    | chr10 | 0.246970149 | + T2D risk | Body    |
| cg25790835    | SLIT3    | chr5  | 0.247042766 | - T2D risk | Body    |
| cg04522984    | ANK2     | chr4  | 0.247183918 | - T2D risk | Body    |
| cg09724301    | GAD1     | chr2  | 0.247209124 | - T2D risk | 5'UTR   |
| cg22579691    | ATP4A    | chr19 | 0.247236191 | + T2D risk | Body    |
| cg26783666    | SSB      | chr2  | 0.247269263 | - T2D risk | TSS1500 |
| cg27222778    | DNAH9    | chr17 | 0.247343614 | - T2D risk | TSS1500 |
| cg19839382    | KDM4B    | chr19 | 0.247453226 | + T2D risk | Body    |
| cg16397746    | RAP2A    | chr13 | 0.247470019 | + T2D risk | Body    |
| cg12110036    | SCAF8    | chr6  | 0.247676248 | + T2D risk | Body    |
| cg22776578    | CPLX2    | chr5  | 0.247710124 | - T2D risk | TSS200  |
| cg11015012    | RAP2A    | chr13 | 0.247790007 | - T2D risk | Body    |
| cg11472319    | AGPAT3   | chr21 | 0.247835077 | + T2D risk | TSS1500 |
| cg13537353    | ATP8A2   | chr13 | 0.247918327 | + T2D risk | Body    |
| cg21967713    | DIP2C    | chr10 | 0.247939551 | + T2D risk | Body    |
| cg05968188    | ATXN1    | chr6  | 0.24796369  | - T2D risk | 5'UTR   |
| cg13537567    | CPLX2    | chr5  | 0.248083478 | + T2D risk | 5'UTR   |
| cg08178031    | ST6GAL1  | chr3  | 0.24809637  | - T2D risk | 5'UTR   |
| cg24843499    | ATXN1    | chr6  | 0.248183336 | - T2D risk | 5'UTR   |
| cg09187217    | LAP3     | chr4  | 0.248186377 | - T2D risk | Body    |
| cg10037326    | GRK5     | chr10 | 0.248221682 | + T2D risk | Body    |
| cg01937505    | CLOCK    | chr4  | 0.248263361 | - T2D risk | 5'UTR   |
| cg10173751    | RAP1GAP2 | chr17 | 0.248345581 | + T2D risk | Body    |
| cg18470649    | CLOCK    | chr4  | 0.248356174 | - T2D risk | Body    |
| cg14100888    | LMX1B    | chr9  | 0.248359705 | - T2D risk | Body    |
| cg15718164    | TBC1D5   | chr3  | 0.248388513 | + T2D risk | Body    |
| cg07571638    | DIP2C    | chr10 | 0.248412539 | + T2D risk | Body    |
| cg24325309    | DIP2C    | chr10 | 0.248420329 | + T2D risk | Body    |
| cg26363263    | CUX2     | chr12 | 0.248470155 | + T2D risk | Body    |
| cg27356587    | ATXN1    | chr6  | 0.248515904 | + T2D risk | 5'UTR   |
| cg10964639    | PRKCB    | chr16 | 0.248688437 | + T2D risk | Body    |
| cg18196453    | RNF217   | chr6  | 0.248693602 | + T2D risk | Body    |
| cg09435245    | CHID1    | chr11 | 0.248731935 | + T2D risk | Body    |
| ch.16.406779R | CLEC16A  | chr16 | 0.248819876 | - T2D risk | Body    |
| cg00934626    | ATP8A2   | chr13 | 0.248957844 | + T2D risk | Body    |
| cg25793978    | WWP2     | chr16 | 0.24897172  | - T2D risk | Body    |
| cg08383942    | TMEM59   | chr1  | 0.24897185  | + T2D risk | 5'UTR   |
| cg08383942    | TMEM59   | chr1  | 0.24897185  | + T2D risk | Body    |
| cg25692259    | FARSB    | chr2  | 0.249119537 | + T2D risk | Body    |
| cg13380511    | PACS1    | chr11 | 0.249149445 | - T2D risk | 1stExon |
| cg08051625    | CREBBP   | chr16 | 0.249186752 | - T2D risk | Body    |
| cg05768078    | WWP2     | chr16 | 0.249254691 | - T2D risk | 5'UTR   |
| cg26463020    | SEC31A   | chr4  | 0.249270403 | + T2D risk | TSS1500 |
| cg23240565    | NDUFB3   | chr2  | 0.249322201 | + T2D risk | 5'UTR   |



|            |          |       |             |            |         |
|------------|----------|-------|-------------|------------|---------|
| cg23240565 | NDUFB3   | chr2  | 0.249322201 | + T2D risk | 1stExon |
| cg15920906 | CUX2     | chr12 | 0.249491294 | - T2D risk | Body    |
| cg05448504 | TSHZ1    | chr18 | 0.249501681 | + T2D risk | 5'UTR   |
| cg24737418 | NPEPPS   | chr17 | 0.249563834 | - T2D risk | Body    |
| cg20586334 | UXS1     | chr2  | 0.249675937 | + T2D risk | Body    |
| cg16427743 | PLEKHG3  | chr14 | 0.249754578 | + T2D risk | Body    |
| cg18151685 | CUX1     | chr7  | 0.249895529 | + T2D risk | Body    |
| cg06650786 | NOTCH3   | chr19 | 0.250182016 | - T2D risk | TSS1500 |
| cg27552483 | CLEC16A  | chr16 | 0.250191429 | + T2D risk | Body    |
| cg16705835 | NGLY1    | chr3  | 0.250511296 | + T2D risk | Body    |
| cg05315865 | ZDHHC2   | chr8  | 0.250584251 | - T2D risk | TSS1500 |
| cg20384615 | ATRN     | chr20 | 0.250589307 | - T2D risk | Body    |
| cg06354759 | CLEC16A  | chr16 | 0.250610385 | + T2D risk | Body    |
| cg12224816 | DIP2C    | chr10 | 0.250670673 | - T2D risk | Body    |
| cg15105716 | TTC28    | chr22 | 0.250865614 | - T2D risk | Body    |
| cg06851941 | FBXL2    | chr3  | 0.250884193 | + T2D risk | Body    |
| cg20702935 | WIZ      | chr19 | 0.250924119 | + T2D risk | 5'UTR   |
| cg24857809 | TMEM131  | chr2  | 0.250978955 | + T2D risk | Body    |
| cg27542747 | ATP8A2   | chr13 | 0.251006369 | - T2D risk | Body    |
| cg03928539 | KCNJ12   | chr17 | 0.251149857 | - T2D risk | TSS200  |
| cg06109812 | UBE2K    | chr4  | 0.251267152 | - T2D risk | Body    |
| cg01910727 | ITPKB    | chr1  | 0.251280213 | + T2D risk | Body    |
| cg12179148 | LAMA4    | chr6  | 0.251420181 | - T2D risk | Body    |
| cg27650699 | ATP8A2   | chr13 | 0.251454779 | + T2D risk | Body    |
| cg11932989 | UBL3     | chr13 | 0.251829852 | - T2D risk | Body    |
| cg18997564 | TJP1     | chr15 | 0.251945942 | - T2D risk | Body    |
| cg00284949 | ST6GAL1  | chr3  | 0.251981893 | + T2D risk | 5'UTR   |
| cg12554655 | CPLX2    | chr5  | 0.251991173 | - T2D risk | 5'UTR   |
| cg12554655 | CPLX2    | chr5  | 0.251991173 | - T2D risk | 1stExon |
| cg20958559 | POC1B    | chr12 | 0.252150741 | - T2D risk | ExonBnd |
| cg20958559 | POC1B    | chr12 | 0.252150741 | - T2D risk | Body    |
| cg23812119 | TMEM131  | chr2  | 0.2521799   | + T2D risk | Body    |
| cg03927165 | NUF2     | chr1  | 0.252205353 | + T2D risk | 5'UTR   |
| cg00256463 | GRK5     | chr10 | 0.252224962 | + T2D risk | Body    |
| cg07474678 | PRKACB   | chr1  | 0.252329358 | + T2D risk | Body    |
| cg07474678 | PRKACB   | chr1  | 0.252329358 | + T2D risk | TSS1500 |
| cg22570405 | PRKCE    | chr2  | 0.25236138  | - T2D risk | Body    |
| cg09864183 | SPOCK1   | chr5  | 0.25236467  | + T2D risk | Body    |
| cg17633639 | DNAJC13  | chr3  | 0.252434554 | - T2D risk | Body    |
| cg23771319 | DIP2C    | chr10 | 0.252493824 | - T2D risk | Body    |
| cg14036758 | KIAA0232 | chr4  | 0.252515377 | - T2D risk | Body    |
| cg18841660 | ARHGAP32 | chr11 | 0.252524117 | - T2D risk | Body    |
| cg04432137 | CREBBP   | chr16 | 0.252722386 | + T2D risk | Body    |
| cg15618712 | PDE3A    | chr12 | 0.252725372 | - T2D risk | 1stExon |
| cg05200658 | CMTR1    | chr6  | 0.25283135  | + T2D risk | 5'UTR   |
| cg00491418 | LAMA4    | chr6  | 0.252873932 | + T2D risk | 5'UTR   |
| cg12241599 | MEIS2    | chr15 | 0.252993538 | + T2D risk | Body    |
| cg27470916 | CADM1    | chr11 | 0.253039676 | - T2D risk | Body    |
| cg18232597 | NF1      | chr17 | 0.253316032 | + T2D risk | Body    |
| cg07282184 | RGS7     | chr1  | 0.253330313 | + T2D risk | Body    |
| cg10731022 | EIF4EBP3 | chr5  | 0.253403756 | + T2D risk | 1stExon |
| cg10731022 | EIF4EBP3 | chr5  | 0.253403756 | + T2D risk | 5'UTR   |
| cg16646459 | CUX2     | chr12 | 0.253469712 | + T2D risk | Body    |
| cg11291456 | RAP1B    | chr12 | 0.253499064 | - T2D risk | 5'UTR   |
| cg23252899 | KDM4B    | chr19 | 0.253681623 | - T2D risk | 5'UTR   |
| cg07093681 | FLT1     | chr13 | 0.253754486 | - T2D risk | Body    |
| cg18391757 | NPAT     | chr11 | 0.253790236 | - T2D risk | TSS200  |
| cg22537964 | ATP6V1H  | chr8  | 0.253866178 | + T2D risk | 5'UTR   |
| cg08354372 | WWP2     | chr16 | 0.253945971 | - T2D risk | Body    |
| cg08507917 | TTC28    | chr22 | 0.254035871 | - T2D risk | Body    |
| cg03352776 | CUX2     | chr12 | 0.254119755 | - T2D risk | TSS1500 |
| cg25013161 | FARSB    | chr2  | 0.254160616 | - T2D risk | TSS1500 |
| cg18729871 | PACS1    | chr11 | 0.254185832 | + T2D risk | Body    |
| cg00009922 | COL4A1   | chr13 | 0.25421692  | - T2D risk | Body    |
| cg14695332 | ITPKB    | chr1  | 0.254336907 | + T2D risk | Body    |
| cg03518390 | PACS2    | chr14 | 0.254377924 | + T2D risk | Body    |
| cg26931308 | DNAJC1   | chr10 | 0.254492063 | - T2D risk | TSS200  |
| cg05550276 | TOX3     | chr16 | 0.254522067 | - T2D risk | 5'UTR   |
| cg05550276 | TOX3     | chr16 | 0.254522067 | - T2D risk | Body    |
| cg12794094 | PLEKHG3  | chr14 | 0.254540675 | + T2D risk | Body    |



|            |          |       |             |            |         |
|------------|----------|-------|-------------|------------|---------|
| cg01190164 | CNTROB   | chr17 | 0.25472815  | - T2D risk | Body    |
| cg24435924 | MAST1    | chr19 | 0.254841449 | + T2D risk | Body    |
| cg01221286 | WDR47    | chr1  | 0.254936308 | - T2D risk | 5'UTR   |
| cg03476195 | ANK2     | chr4  | 0.254937925 | - T2D risk | TSS200  |
| cg03476195 | ANK2     | chr4  | 0.254937925 | - T2D risk | Body    |
| cg01972495 | GRK5     | chr10 | 0.255198573 | + T2D risk | Body    |
| cg25711558 | CUX1     | chr7  | 0.255215967 | - T2D risk | Body    |
| cg26995689 | AGPAT3   | chr21 | 0.255237155 | + T2D risk | Body    |
| cg23805719 | CUX1     | chr7  | 0.255248341 | - T2D risk | Body    |
| cg20539934 | PACS1    | chr11 | 0.255272856 | + T2D risk | Body    |
| cg26161895 | FNIP2    | chr4  | 0.255361212 | - T2D risk | Body    |
| cg13013143 | ERC2     | chr3  | 0.255489396 | - T2D risk | 3'UTR   |
| cg21497114 | ARPP19   | chr15 | 0.25551413  | - T2D risk | 1stExon |
| cg21497114 | ARPP19   | chr15 | 0.25551413  | - T2D risk | Body    |
| cg21497114 | ARPP19   | chr15 | 0.25551413  | - T2D risk | ExonBnd |
| cg26741262 | MTHFS    | chr15 | 0.255586875 | - T2D risk | TSS1500 |
| cg25396790 | CDH22    | chr20 | 0.255608682 | - T2D risk | Body    |
| cg13351028 | DIP2C    | chr10 | 0.255760986 | + T2D risk | Body    |
| cg03189019 | CUX1     | chr7  | 0.255825317 | - T2D risk | Body    |
| cg16504801 | FARSB    | chr2  | 0.255966557 | + T2D risk | Body    |
| cg09276050 | CUX1     | chr7  | 0.256017283 | - T2D risk | Body    |
| cg24484394 | PACS1    | chr11 | 0.256162637 | + T2D risk | Body    |
| cg23525112 | ATP2B1   | chr12 | 0.256201356 | + T2D risk | Body    |
| cg11787262 | PKD1     | chr2  | 0.25626478  | + T2D risk | TSS200  |
| cg16688899 | POC1B    | chr12 | 0.256527098 | + T2D risk | Body    |
| cg16688899 | POC1B    | chr12 | 0.256527098 | + T2D risk | 5'UTR   |
| cg14940505 | CADM1    | chr11 | 0.256532802 | - T2D risk | Body    |
| cg14940505 | CADM1    | chr11 | 0.256532802 | - T2D risk | ExonBnd |
| cg15800161 | ARL15    | chr5  | 0.256613128 | - T2D risk | TSS1500 |
| cg14497145 | DIP2C    | chr10 | 0.256651132 | + T2D risk | Body    |
| cg25174591 | DNAH9    | chr17 | 0.25667502  | - T2D risk | TSS200  |
| cg02280422 | DNAJC1   | chr10 | 0.256750524 | + T2D risk | Body    |
| cg13462525 | PKD1     | chr2  | 0.256775786 | + T2D risk | TSS200  |
| cg13462525 | PKD1     | chr2  | 0.256775786 | + T2D risk | TSS1500 |
| cg16061656 | CADM1    | chr11 | 0.256842125 | - T2D risk | Body    |
| cg02027561 | NCOA7    | chr6  | 0.257033452 | - T2D risk | TSS1500 |
| cg02562678 | ASXL2    | chr2  | 0.257034083 | + T2D risk | Body    |
| cg22199864 | DNAJC1   | chr10 | 0.257043923 | - T2D risk | Body    |
| cg24729690 | CPLX2    | chr5  | 0.257070076 | + T2D risk | 5'UTR   |
| cg04543115 | MAST1    | chr19 | 0.257091764 | + T2D risk | Body    |
| cg07724793 | COL4A1   | chr13 | 0.25711255  | - T2D risk | Body    |
| cg03974850 | PDE7A    | chr8  | 0.257170949 | + T2D risk | Body    |
| cg24456235 | ITGA1    | chr5  | 0.257290904 | - T2D risk | Body    |
| cg03643538 | CADM1    | chr11 | 0.257295339 | - T2D risk | 3'UTR   |
| cg17309644 | NPEPPS   | chr17 | 0.257367602 | + T2D risk | Body    |
| cg06149183 | NGLY1    | chr3  | 0.257513634 | - T2D risk | Body    |
| cg06149183 | NGLY1    | chr3  | 0.257513634 | - T2D risk | TSS1500 |
| cg04422019 | DDC      | chr7  | 0.257610973 | - T2D risk | 5'UTR   |
| cg04063945 | KIAA1217 | chr10 | 0.257684034 | + T2D risk | TSS1500 |
| cg17710875 | TMEM131  | chr2  | 0.257756563 | - T2D risk | Body    |
| cg15287850 | ST6GAL1  | chr3  | 0.257793848 | - T2D risk | TSS200  |
| cg15287850 | ST6GAL1  | chr3  | 0.257793848 | - T2D risk | 5'UTR   |
| cg06109044 | GRK5     | chr10 | 0.257803733 | + T2D risk | Body    |
| cg23677243 | MEIS2    | chr15 | 0.258105747 | - T2D risk | Body    |
| cg26022581 | PACS2    | chr14 | 0.2581542   | - T2D risk | Body    |
| cg03141815 | CUX1     | chr7  | 0.258218572 | - T2D risk | Body    |
| cg05698117 | ASH1L    | chr1  | 0.258222253 | + T2D risk | Body    |
| cg20645177 | ANK3     | chr10 | 0.258274906 | - T2D risk | Body    |
| cg09510202 | PHACTR1  | chr6  | 0.258351808 | - T2D risk | Body    |
| cg09534501 | ANK2     | chr4  | 0.258367954 | + T2D risk | Body    |
| cg04025761 | CUX2     | chr12 | 0.258396151 | - T2D risk | Body    |
| cg11744351 | UBL3     | chr13 | 0.258478203 | - T2D risk | 1stExon |
| cg11744351 | UBL3     | chr13 | 0.258478203 | - T2D risk | 5'UTR   |
| cg18639524 | PDE3A    | chr12 | 0.258684656 | + T2D risk | Body    |
| cg12658906 | DIP2C    | chr10 | 0.258751161 | + T2D risk | Body    |
| cg24251659 | CUX1     | chr7  | 0.258757817 | - T2D risk | Body    |
| cg20411049 | RSF1     | chr11 | 0.258767734 | + T2D risk | Body    |
| cg26467471 | DIP2C    | chr10 | 0.258781786 | + T2D risk | Body    |
| cg17095257 | PDE8A    | chr15 | 0.258800928 | - T2D risk | Body    |
| cg14436312 | ITGA1    | chr5  | 0.258959069 | + T2D risk | Body    |



|            |          |       |             |            |         |
|------------|----------|-------|-------------|------------|---------|
| cg11506711 | SCARB2   | chr4  | 0.25901759  | - T2D risk | Body    |
| cg14755054 | NDUFB3   | chr2  | 0.259076243 | - T2D risk | 5'UTR   |
| cg03588978 | IMPA1    | chr8  | 0.259085159 | - T2D risk | TSS200  |
| cg10441401 | DIP2C    | chr10 | 0.259114179 | - T2D risk | Body    |
| cg00997754 | WWP2     | chr16 | 0.259255484 | - T2D risk | 5'UTR   |
| cg25410950 | AMD1     | chr6  | 0.259311879 | - T2D risk | 5'UTR   |
| cg25410950 | AMD1     | chr6  | 0.259311879 | - T2D risk | Body    |
| cg16548015 | ACTN4    | chr19 | 0.259449303 | + T2D risk | Body    |
| cg07007834 | CHFR     | chr12 | 0.259459871 | + T2D risk | Body    |
| cg06364066 | NCOA2    | chr8  | 0.259535218 | + T2D risk | Body    |
| cg04151469 | CUX1     | chr7  | 0.259539201 | + T2D risk | Body    |
| cg02911387 | CUX1     | chr7  | 0.259591005 | - T2D risk | Body    |
| cg10580626 | DIP2C    | chr10 | 0.259718715 | + T2D risk | Body    |
| cg18455405 | ATXN1    | chr6  | 0.259722054 | + T2D risk | 3'UTR   |
| cg11226009 | ARHGAP32 | chr11 | 0.259801574 | + T2D risk | 5'UTR   |
| cg11226009 | ARHGAP32 | chr11 | 0.259801574 | + T2D risk | Body    |
| cg20400045 | CRYL1    | chr13 | 0.259868142 | - T2D risk | Body    |
| cg04972436 | BIRC5    | chr17 | 0.259918161 | - T2D risk | Body    |
| cg13807925 | SSBP2    | chr5  | 0.260040709 | - T2D risk | Body    |
| cg22366933 | CUX1     | chr7  | 0.260082883 | - T2D risk | Body    |
| cg04605143 | DIP2C    | chr10 | 0.260138934 | + T2D risk | Body    |
| cg20452738 | ITPKB    | chr1  | 0.260273615 | + T2D risk | Body    |
| cg13357776 | KDM4B    | chr19 | 0.260486313 | + T2D risk | Body    |
| cg03265360 | ATXN1    | chr6  | 0.260570543 | - T2D risk | 5'UTR   |
| cg15086714 | TENM2    | chr5  | 0.260602991 | - T2D risk | Body    |
| cg17486877 | ANKHD1   | chr5  | 0.26062633  | + T2D risk | Body    |
| cg26662007 | WDR47    | chr1  | 0.260655472 | - T2D risk | TSS200  |
| cg24074495 | ITGA1    | chr5  | 0.260687794 | - T2D risk | Body    |
| cg18199556 | COL4A1   | chr13 | 0.260737608 | - T2D risk | Body    |
| cg15021585 | CRYL1    | chr13 | 0.260801485 | - T2D risk | Body    |
| cg23368586 | ULK4     | chr3  | 0.260803845 | - T2D risk | Body    |
| cg17712120 | ANK3     | chr10 | 0.26097711  | + T2D risk | TSS1500 |
| cg09915984 | PLEKHG3  | chr14 | 0.26108817  | - T2D risk | 5'UTR   |
| cg06136160 | PACRG    | chr6  | 0.261106325 | - T2D risk | Body    |
| cg18269091 | POC1B    | chr12 | 0.261118497 | - T2D risk | Body    |
| cg18314885 | TOP2A    | chr17 | 0.261249808 | + T2D risk | Body    |
| cg16341266 | CNTNAP2  | chr7  | 0.261360871 | + T2D risk | Body    |
| cg14081634 | PDE3A    | chr12 | 0.261400115 | - T2D risk | Body    |
| cg09453838 | DYNC111  | chr7  | 0.261620883 | + T2D risk | Body    |
| cg14242633 | PRKCE    | chr2  | 0.261718617 | + T2D risk | Body    |
| cg07931221 | ATRNL1   | chr10 | 0.261736861 | - T2D risk | Body    |
| cg21227035 | UXS1     | chr2  | 0.261866684 | - T2D risk | Body    |
| cg14863265 | GNA12    | chr7  | 0.261940592 | + T2D risk | Body    |
| cg17354314 | CDK8     | chr13 | 0.261943377 | - T2D risk | Body    |
| cg04374604 | RHOQ     | chr2  | 0.262177    | - T2D risk | TSS1500 |
| cg25627693 | GRK5     | chr10 | 0.262179693 | + T2D risk | Body    |
| cg01363077 | ATP6V1H  | chr8  | 0.262231174 | - T2D risk | Body    |
| cg08845730 | ROBO2    | chr3  | 0.262399205 | + T2D risk | 1stExon |
| cg08845730 | ROBO2    | chr3  | 0.262399205 | + T2D risk | Body    |
| cg00961203 | PACRG    | chr6  | 0.262419914 | + T2D risk | Body    |
| cg27306873 | TSGA10   | chr2  | 0.262602432 | - T2D risk | TSS1500 |
| cg01734951 | TIIMM23  | chr10 | 0.262634653 | - T2D risk | Body    |
| cg19905126 | DNAJC1   | chr10 | 0.262722257 | + T2D risk | Body    |
| cg13837309 | SLC7A2   | chr8  | 0.262909029 | - T2D risk | 5'UTR   |
| cg10495606 | PRKCE    | chr2  | 0.262970003 | - T2D risk | Body    |
| cg04865480 | PDK1     | chr2  | 0.263073791 | - T2D risk | 1stExon |
| cg09445902 | DIP2C    | chr10 | 0.263115997 | + T2D risk | Body    |
| cg06468911 | PHACTR1  | chr6  | 0.263132988 | - T2D risk | Body    |
| cg26870725 | MAST1    | chr19 | 0.263306051 | - T2D risk | Body    |
| cg11779254 | KIAA1217 | chr10 | 0.26336401  | - T2D risk | Body    |
| cg10510442 | ZHX2     | chr8  | 0.263512666 | + T2D risk | 3'UTR   |
| cg23036244 | BCAT1    | chr12 | 0.263526453 | + T2D risk | 5'UTR   |
| cg23036244 | BCAT1    | chr12 | 0.263526453 | + T2D risk | 1stExon |
| cg20521148 | SLIT3    | chr5  | 0.263546977 | - T2D risk | Body    |
| cg02556805 | ATP8A2   | chr13 | 0.263920192 | - T2D risk | Body    |
| cg22587186 | LAMA4    | chr6  | 0.263949396 | - T2D risk | Body    |
| cg22703888 | SPAG9    | chr17 | 0.264092663 | - T2D risk | Body    |
| cg11806305 | ANKHD1   | chr5  | 0.264144711 | - T2D risk | Body    |
| cg03662697 | DIP2C    | chr10 | 0.264181174 | - T2D risk | TSS1500 |
| cg17214279 | EFR3A    | chr8  | 0.264335384 | + T2D risk | Body    |



|            |          |       |             |            |         |
|------------|----------|-------|-------------|------------|---------|
| cg12855997 | PRKAG2   | chr7  | 0.26461309  | + T2D risk | Body    |
| cg14401311 | CDH22    | chr20 | 0.264641149 | - T2D risk | 5'UTR   |
| cg11794625 | FARSB    | chr2  | 0.264641657 | - T2D risk | TSS1500 |
| cg04223442 | NCOR1    | chr17 | 0.264689599 | + T2D risk | 5'UTR   |
| cg16827459 | LMX1B    | chr9  | 0.264724139 | + T2D risk | Body    |
| cg14710084 | MAN1A1   | chr6  | 0.264753497 | - T2D risk | Body    |
| cg11175091 | ANK2     | chr4  | 0.264754961 | - T2D risk | Body    |
| cg19595016 | SGSM2    | chr17 | 0.264858891 | - T2D risk | Body    |
| cg14750721 | AGPAT3   | chr21 | 0.264946102 | + T2D risk | 5'UTR   |
| cg09325373 | PTPRU    | chr1  | 0.264971131 | + T2D risk | Body    |
| cg04563122 | CADM1    | chr11 | 0.265020852 | - T2D risk | Body    |
| cg23403864 | YWHAQ    | chr2  | 0.265031017 | - T2D risk | Body    |
| cg04614212 | NPAT     | chr11 | 0.265106217 | + T2D risk | Body    |
| cg00436050 | ZHX2     | chr8  | 0.265179753 | + T2D risk | 5'UTR   |
| cg12914100 | TPCN1    | chr12 | 0.265273076 | + T2D risk | 3'UTR   |
| cg13457392 | SRPK2    | chr7  | 0.265327146 | + T2D risk | Body    |
| cg15587829 | SGSM2    | chr17 | 0.26536195  | - T2D risk | Body    |
| cg24183566 | CUX1     | chr7  | 0.265371054 | + T2D risk | Body    |
| cg09744867 | GALK2    | chr15 | 0.265415961 | + T2D risk | Body    |
| cg11404277 | RHBDD1   | chr2  | 0.265503451 | - T2D risk | Body    |
| cg21215323 | DLL4     | chr15 | 0.265581069 | + T2D risk | TSS1500 |
| cg16268233 | SPOCK1   | chr5  | 0.265582638 | - T2D risk | Body    |
| cg26760813 | ASXL2    | chr2  | 0.265648113 | + T2D risk | TSS1500 |
| cg26977742 | EFR3A    | chr8  | 0.265713354 | + T2D risk | Body    |
| cg24718710 | DIP2C    | chr10 | 0.265733508 | - T2D risk | Body    |
| cg06508056 | CNTNAP2  | chr7  | 0.265788429 | + T2D risk | Body    |
| cg19949241 | ANK2     | chr4  | 0.26586464  | - T2D risk | Body    |
| cg02353484 | PACS1    | chr11 | 0.265951413 | + T2D risk | TSS1500 |
| cg20723815 | ZDHHC2   | chr8  | 0.266016733 | - T2D risk | Body    |
| cg00951960 | ATXN1    | chr6  | 0.266233191 | - T2D risk | 5'UTR   |
| cg20567093 | RAP1GAP2 | chr17 | 0.266367363 | - T2D risk | Body    |
| cg04421151 | GRK5     | chr10 | 0.266478383 | + T2D risk | Body    |
| cg14702988 | RCAN2    | chr6  | 0.266529258 | + T2D risk | 5'UTR   |
| cg14702988 | RCAN2    | chr6  | 0.266529258 | + T2D risk | TSS200  |
| cg22792560 | FAM160A1 | chr4  | 0.266538466 | + T2D risk | 5'UTR   |
| cg17522601 | CHFR     | chr12 | 0.266547688 | + T2D risk | Body    |
| cg06683978 | PDLIM5   | chr4  | 0.26655298  | - T2D risk | 5'UTR   |
| cg06683978 | PDLIM5   | chr4  | 0.26655298  | - T2D risk | Body    |
| cg13305165 | OXSM     | chr3  | 0.266557934 | - T2D risk | Body    |
| cg13305165 | OXSM     | chr3  | 0.266557934 | - T2D risk | 5'UTR   |
| cg13305165 | NGLY1    | chr3  | 0.266557934 | - T2D risk | TSS1500 |
| cg03503785 | PRKCB    | chr16 | 0.266562436 | - T2D risk | Body    |
| cg13015673 | RHBDD1   | chr2  | 0.2665864   | - T2D risk | Body    |
| cg23581430 | CREBBP   | chr16 | 0.266792909 | + T2D risk | Body    |
| cg07665487 | EFR3A    | chr8  | 0.266850987 | + T2D risk | TSS1500 |
| cg16141840 | CLIC5    | chr6  | 0.266898915 | + T2D risk | Body    |
| cg21524461 | PDE3A    | chr12 | 0.266924433 | - T2D risk | Body    |
| cg12144374 | ZHX2     | chr8  | 0.266959173 | - T2D risk | TSS1500 |
| cg01991762 | CTR9     | chr11 | 0.267110668 | + T2D risk | TSS1500 |
| cg11241032 | COL4A1   | chr13 | 0.267167587 | - T2D risk | Body    |
| cg22422589 | ARIH1    | chr15 | 0.267377029 | + T2D risk | Body    |
| cg09641576 | SLC29A4  | chr7  | 0.267437618 | - T2D risk | Body    |
| cg06326591 | CUX1     | chr7  | 0.267463287 | + T2D risk | 3'UTR   |
| cg06326591 | CUX1     | chr7  | 0.267463287 | + T2D risk | Body    |
| cg20422160 | PHACTR1  | chr6  | 0.267539834 | + T2D risk | Body    |
| cg17675311 | TSC22D1  | chr13 | 0.267797573 | + T2D risk | Body    |
| cg06413165 | PLEKHG3  | chr14 | 0.267808079 | + T2D risk | 5'UTR   |
| cg13540417 | CLEC16A  | chr16 | 0.267816825 | - T2D risk | Body    |
| cg03917670 | ZHX2     | chr8  | 0.267922023 | + T2D risk | 5'UTR   |
| cg00863438 | GRK5     | chr10 | 0.268109282 | - T2D risk | Body    |
| cg10289699 | PLAGL1   | chr6  | 0.26814511  | + T2D risk | 5'UTR   |
| cg15927720 | SLIT3    | chr5  | 0.268170441 | - T2D risk | TSS200  |
| cg23458989 | DIP2C    | chr10 | 0.26822864  | + T2D risk | Body    |
| cg19003301 | CADM1    | chr11 | 0.268424854 | - T2D risk | Body    |
| cg01883164 | TENM2    | chr5  | 0.268542748 | - T2D risk | Body    |
| cg20365403 | ZHX2     | chr8  | 0.26869166  | - T2D risk | TSS1500 |
| cg02503303 | PICALM   | chr11 | 0.268808736 | + T2D risk | TSS1500 |
| cg14497787 | SRPK2    | chr7  | 0.268816402 | - T2D risk | TSS1500 |
| cg22574825 | FLT1     | chr13 | 0.268903853 | - T2D risk | 5'UTR   |
| cg22574825 | FLT1     | chr13 | 0.268903853 | - T2D risk | 1stExon |



|            |          |       |             |            |         |
|------------|----------|-------|-------------|------------|---------|
| cg01802114 | ANK3     | chr10 | 0.268916332 | - T2D risk | Body    |
| cg04865267 | PRKCE    | chr2  | 0.268995043 | + T2D risk | Body    |
| cg18467406 | DIP2C    | chr10 | 0.269002115 | + T2D risk | Body    |
| cg07588253 | NGF      | chr1  | 0.26921692  | + T2D risk | 5'UTR   |
| cg00093653 | RAP1GAP2 | chr17 | 0.269256948 | + T2D risk | Body    |
| cg17194350 | SGSM2    | chr17 | 0.269280564 | - T2D risk | Body    |
| cg06788850 | ARHGAP32 | chr11 | 0.269314762 | - T2D risk | Body    |
| cg19163331 | EFR3A    | chr8  | 0.269486995 | - T2D risk | Body    |
| cg04011030 | APC      | chr5  | 0.269681854 | + T2D risk | TSS200  |
| cg16048781 | NOTCH3   | chr19 | 0.269775111 | - T2D risk | Body    |
| cg04523560 | CUX1     | chr7  | 0.269847108 | + T2D risk | Body    |
| cg26080096 | FAM160A1 | chr4  | 0.269848054 | + T2D risk | 5'UTR   |
| cg07222250 | ROBO2    | chr3  | 0.270229117 | - T2D risk | Body    |
| cg05450336 | DIP2C    | chr10 | 0.270230618 | + T2D risk | Body    |
| cg26670992 | ATP8A1   | chr4  | 0.270378855 | - T2D risk | ExonBnd |
| cg26670992 | ATP8A1   | chr4  | 0.270378855 | - T2D risk | Body    |
| cg21300742 | USP53    | chr4  | 0.270389726 | + T2D risk | TSS200  |
| cg00360534 | GALK2    | chr15 | 0.270420116 | + T2D risk | Body    |
| cg00360534 | GALK2    | chr15 | 0.270420116 | + T2D risk | TSS1500 |
| cg12923613 | SEC31A   | chr4  | 0.270469193 | + T2D risk | 5'UTR   |
| cg08918224 | CHID1    | chr11 | 0.270574165 | - T2D risk | 5'UTR   |
| cg05749717 | CNTNAP2  | chr7  | 0.270595407 | - T2D risk | TSS200  |
| cg13034073 | GNA12    | chr7  | 0.270665527 | + T2D risk | 3'UTR   |
| cg18849114 | ULK4     | chr3  | 0.270726808 | - T2D risk | TSS1500 |
| cg23404286 | ST20     | chr15 | 0.270741595 | + T2D risk | 5'UTR   |
| cg23404286 | ST20     | chr15 | 0.270741595 | + T2D risk | Body    |
| cg07414840 | UXS1     | chr2  | 0.271338405 | - T2D risk | Body    |
| cg24365811 | CHID1    | chr11 | 0.271399791 | - T2D risk | Body    |
| cg23424145 | COL4A1   | chr13 | 0.271422995 | + T2D risk | Body    |
| cg19138785 | TSC22D1  | chr13 | 0.271477531 | - T2D risk | Body    |
| cg19138785 | TSC22D1  | chr13 | 0.271477531 | - T2D risk | TSS200  |
| cg20934389 | ACTN4    | chr19 | 0.271480988 | + T2D risk | Body    |
| cg04236145 | PRKAG2   | chr7  | 0.271544071 | + T2D risk | Body    |
| cg11909989 | EFR3A    | chr8  | 0.271550978 | + T2D risk | 3'UTR   |
| cg01758864 | PFKFB2   | chr1  | 0.271651053 | - T2D risk | Body    |
| cg03460027 | DIP2C    | chr10 | 0.271662609 | + T2D risk | Body    |
| cg16933762 | ROBO2    | chr3  | 0.271674998 | - T2D risk | TSS200  |
| cg16933762 | ROBO2    | chr3  | 0.271674998 | - T2D risk | Body    |
| cg02786378 | SLC7A2   | chr8  | 0.271716932 | + T2D risk | Body    |
| cg02786378 | SLC7A2   | chr8  | 0.271716932 | + T2D risk | 5'UTR   |
| cg02628581 | TAB2     | chr6  | 0.27183186  | - T2D risk | 5'UTR   |
| cg02628581 | TAB2     | chr6  | 0.27183186  | - T2D risk | Body    |
| cg03890659 | APBA1    | chr9  | 0.271889476 | - T2D risk | 1stExon |
| cg03890659 | APBA1    | chr9  | 0.271889476 | - T2D risk | 5'UTR   |
| cg00183804 | KIAA0355 | chr19 | 0.272225007 | + T2D risk | 5'UTR   |
| cg07797208 | USP29    | chr19 | 0.272249782 | + T2D risk | 3'UTR   |
| cg01803488 | PFKFB2   | chr1  | 0.27225514  | + T2D risk | Body    |
| cg04759439 | ERC2     | chr3  | 0.27232324  | - T2D risk | TSS1500 |
| cg03453374 | CLIC5    | chr6  | 0.272325455 | + T2D risk | Body    |
| cg26837161 | NUCB2    | chr11 | 0.272334669 | + T2D risk | 5'UTR   |
| cg26229043 | KIAA1217 | chr10 | 0.27237106  | - T2D risk | 5'UTR   |
| cg06887159 | PHF21A   | chr11 | 0.272442257 | + T2D risk | TSS200  |
| cg13375690 | PDE7A    | chr8  | 0.272460425 | + T2D risk | Body    |
| cg04986494 | ERC2     | chr3  | 0.272497807 | - T2D risk | Body    |
| cg16426510 | PHF21A   | chr11 | 0.27259273  | - T2D risk | Body    |
| cg09475221 | WWP2     | chr16 | 0.272648499 | + T2D risk | Body    |
| cg00010168 | MMS19    | chr10 | 0.272650026 | + T2D risk | TSS1500 |
| cg06852243 | DNAH9    | chr17 | 0.27265153  | + T2D risk | Body    |
| cg08913356 | GLG1     | chr16 | 0.27268248  | + T2D risk | 3'UTR   |
| cg08913356 | GLG1     | chr16 | 0.27268248  | + T2D risk | Body    |
| cg22117688 | UBL3     | chr13 | 0.272696064 | + T2D risk | Body    |
| cg06782818 | MMS19    | chr10 | 0.272714103 | + T2D risk | ExonBnd |
| cg06782818 | MMS19    | chr10 | 0.272714103 | + T2D risk | Body    |
| cg25361193 | ATXN1    | chr6  | 0.272782053 | - T2D risk | 5'UTR   |
| cg11764535 | RCAN2    | chr6  | 0.272874591 | - T2D risk | Body    |
| cg21922298 | SCARB2   | chr4  | 0.272895263 | - T2D risk | Body    |
| cg04422300 | NF1      | chr17 | 0.272969289 | + T2D risk | Body    |
| cg22018930 | PRKCB    | chr16 | 0.273079396 | - T2D risk | Body    |
| cg16222616 | POC1B    | chr12 | 0.273085419 | - T2D risk | Body    |
| cg13935507 | ZHX2     | chr8  | 0.273141927 | - T2D risk | 1stExon |



|               |         |       |             |            |         |
|---------------|---------|-------|-------------|------------|---------|
| cg13935507    | ZHX2    | chr8  | 0.273141927 | - T2D risk | 5'UTR   |
| cg22508229    | ZDHHHC2 | chr8  | 0.273214595 | + T2D risk | TSS1500 |
| cg14289093    | RNF157  | chr17 | 0.273525962 | + T2D risk | Body    |
| cg15745450    | KDM4B   | chr19 | 0.273597546 | + T2D risk | 5'UTR   |
| cg23082393    | LAMA4   | chr6  | 0.27360049  | + T2D risk | Body    |
| cg08343142    | GRK5    | chr10 | 0.273608132 | + T2D risk | Body    |
| cg20811564    | DNAH9   | chr17 | 0.273831143 | - T2D risk | Body    |
| cg11101081    | BCAT1   | chr12 | 0.273834736 | + T2D risk | TSS1500 |
| cg11855741    | SLIT3   | chr5  | 0.273838008 | - T2D risk | Body    |
| cg08862739    | TBC1D5  | chr3  | 0.273971539 | - T2D risk | Body    |
| cg03087846    | TPCN1   | chr12 | 0.27406112  | + T2D risk | Body    |
| cg18802729    | TTC28   | chr22 | 0.274258954 | + T2D risk | Body    |
| cg02489108    | CEP126  | chr11 | 0.274283702 | - T2D risk | Body    |
| cg10688790    | CNTNAP2 | chr7  | 0.274290339 | + T2D risk | Body    |
| cg16409367    | MEIS2   | chr15 | 0.274375171 | - T2D risk | TSS1500 |
| cg21810379    | ANK2    | chr4  | 0.274389494 | - T2D risk | Body    |
| cg13891949    | NF1     | chr17 | 0.274424112 | - T2D risk | TSS1500 |
| cg14165858    | DNAH9   | chr17 | 0.274502726 | - T2D risk | Body    |
| cg02796229    | RGS7    | chr1  | 0.274576372 | - T2D risk | Body    |
| cg11926805    | NCOA7   | chr6  | 0.274594385 | - T2D risk | 5'UTR   |
| cg11926805    | NCOA7   | chr6  | 0.274594385 | - T2D risk | 1stExon |
| cg23567041    | CUX1    | chr7  | 0.274600113 | + T2D risk | Body    |
| cg15857470    | SRPK2   | chr7  | 0.274620344 | - T2D risk | Body    |
| cg02283436    | MGRN1   | chr16 | 0.27463729  | - T2D risk | TSS200  |
| cg07895143    | APBA1   | chr9  | 0.274685302 | - T2D risk | Body    |
| cg00749531    | RHBDD1  | chr2  | 0.274702073 | + T2D risk | 5'UTR   |
| cg21927177    | PLEKHG3 | chr14 | 0.274766549 | - T2D risk | 5'UTR   |
| cg02779966    | CLEC16A | chr16 | 0.274773388 | + T2D risk | Body    |
| cg11462252    | SLIT3   | chr5  | 0.274783237 | - T2D risk | Body    |
| cg22291359    | NCOR1   | chr17 | 0.274806332 | + T2D risk | TSS1500 |
| cg04837412    | TANC2   | chr17 | 0.274817051 | - T2D risk | Body    |
| cg06033320    | PDE7A   | chr8  | 0.274886646 | - T2D risk | Body    |
| cg18963985    | TSHZ1   | chr18 | 0.274968006 | - T2D risk | 5'UTR   |
| cg18963985    | TSHZ1   | chr18 | 0.274968006 | - T2D risk | 1stExon |
| cg07456586    | ST20    | chr15 | 0.27512609  | - T2D risk | 5'UTR   |
| cg07456586    | ST20    | chr15 | 0.27512609  | - T2D risk | Body    |
| cg05436658    | PRKCB   | chr16 | 0.27513178  | + T2D risk | 1stExon |
| cg17899806    | RAP1B   | chr12 | 0.275195018 | - T2D risk | 5'UTR   |
| cg07460734    | USP29   | chr19 | 0.275307112 | - T2D risk | TSS1500 |
| cg00342068    | PPFIBP1 | chr12 | 0.275558843 | - T2D risk | 5'UTR   |
| cg02858808    | CUX1    | chr7  | 0.275678497 | + T2D risk | Body    |
| cg05731594    | LMX1B   | chr9  | 0.275900104 | + T2D risk | Body    |
| cg24844694    | MEIS2   | chr15 | 0.276014035 | + T2D risk | Body    |
| cg05984792    | CDH22   | chr20 | 0.276059958 | - T2D risk | Body    |
| cg07060347    | CUX1    | chr7  | 0.276178381 | + T2D risk | Body    |
| ch.5.2522686R | SPOCK1  | chr5  | 0.276445589 | - T2D risk | Body    |
| cg14658804    | SLIT3   | chr5  | 0.276500449 | - T2D risk | TSS200  |
| cg12537302    | DIP2C   | chr10 | 0.276546973 | + T2D risk | Body    |
| cg01635707    | PLAGL1  | chr6  | 0.276667429 | + T2D risk | 5'UTR   |
| cg04591119    | AMD1    | chr6  | 0.276677366 | + T2D risk | 5'UTR   |
| cg04591119    | AMD1    | chr6  | 0.276677366 | + T2D risk | Body    |
| cg19018883    | PFKFB2  | chr1  | 0.27672125  | - T2D risk | Body    |
| cg16254309    | CNTNAP2 | chr7  | 0.276795666 | - T2D risk | Body    |
| cg21589431    | PDE8A   | chr15 | 0.276958556 | + T2D risk | Body    |
| cg26548811    | PACRG   | chr6  | 0.277049508 | + T2D risk | Body    |
| cg09782637    | DIP2C   | chr10 | 0.277112825 | + T2D risk | Body    |
| cg10606216    | PCYT1A  | chr3  | 0.277319684 | - T2D risk | TSS1500 |
| cg19204958    | DIP2C   | chr10 | 0.277343791 | - T2D risk | Body    |
| cg03816951    | NCOA2   | chr8  | 0.277386399 | + T2D risk | 5'UTR   |
| cg02130601    | NOTCH3  | chr19 | 0.27742262  | + T2D risk | Body    |
| cg17046825    | CRYL1   | chr13 | 0.277427751 | + T2D risk | Body    |
| cg24815618    | NCOR1   | chr17 | 0.2774287   | - T2D risk | Body    |
| cg06847149    | APBA1   | chr9  | 0.277581885 | + T2D risk | Body    |
| cg22610364    | CDH22   | chr20 | 0.277602106 | - T2D risk | 5'UTR   |
| cg04204246    | LAMA4   | chr6  | 0.277616846 | - T2D risk | Body    |
| cg25114586    | PACS2   | chr14 | 0.277689616 | - T2D risk | Body    |
| cg04444450    | NCOA2   | chr8  | 0.277739844 | - T2D risk | 5'UTR   |
| cg02272795    | NOTCH3  | chr19 | 0.277783146 | - T2D risk | Body    |
| cg09432528    | ACTN4   | chr19 | 0.277899899 | + T2D risk | TSS200  |
| cg24539517    | GRK5    | chr10 | 0.277971555 | + T2D risk | Body    |



|            |                 |       |             |            |         |
|------------|-----------------|-------|-------------|------------|---------|
| cg26769186 | <i>PCYT1A</i>   | chr3  | 0.277973743 | + T2D risk | 5'UTR   |
| cg06773023 | <i>EFR3A</i>    | chr8  | 0.278086504 | + T2D risk | Body    |
| cg24890451 | <i>SPOCK1</i>   | chr5  | 0.278142093 | - T2D risk | Body    |
| cg06144920 | <i>TOX3</i>     | chr16 | 0.278477544 | - T2D risk | Body    |
| cg05460980 | <i>ATP8A2</i>   | chr13 | 0.278618583 | - T2D risk | Body    |
| cg01756564 | <i>NPAT</i>     | chr11 | 0.278632481 | + T2D risk | TSS1500 |
| cg15882609 | <i>TSC22D1</i>  | chr13 | 0.278707001 | + T2D risk | TSS1500 |
| cg15882609 | <i>TSC22D1</i>  | chr13 | 0.278707001 | + T2D risk | 5'UTR   |
| cg15882609 | <i>TSC22D1</i>  | chr13 | 0.278707001 | + T2D risk | Body    |
| cg08912210 | <i>CREBBP</i>   | chr16 | 0.278744837 | + T2D risk | Body    |
| cg15483436 | <i>PACS2</i>    | chr14 | 0.278760951 | + T2D risk | Body    |
| cg04179151 | <i>TMEM59</i>   | chr1  | 0.278769275 | - T2D risk | TSS1500 |
| cg04158967 | <i>SLC30A8</i>  | chr8  | 0.278812314 | - T2D risk | TSS1500 |
| cg01853347 | <i>DNAJC13</i>  | chr3  | 0.278815773 | - T2D risk | 5'UTR   |
| cg14128582 | <i>WDR47</i>    | chr1  | 0.278821598 | + T2D risk | 5'UTR   |
| cg14128582 | <i>WDR47</i>    | chr1  | 0.278821598 | + T2D risk | 1stExon |
| cg01211338 | <i>MEIS2</i>    | chr15 | 0.278871032 | - T2D risk | Body    |
| cg18303423 | <i>DIP2C</i>    | chr10 | 0.278872744 | + T2D risk | Body    |
| cg24727133 | <i>CHFR</i>     | chr12 | 0.279082641 | - T2D risk | TSS1500 |
| cg21350431 | <i>GLG1</i>     | chr16 | 0.279296521 | - T2D risk | Body    |
| cg25190437 | <i>SKAP1</i>    | chr17 | 0.279406125 | - T2D risk | Body    |
| cg19584790 | <i>PACS2</i>    | chr14 | 0.279412894 | - T2D risk | Body    |
| cg11019127 | <i>CADM1</i>    | chr11 | 0.279554255 | - T2D risk | Body    |
| cg22896873 | <i>PRKAG2</i>   | chr7  | 0.279648751 | + T2D risk | Body    |
| cg10259277 | <i>RNF157</i>   | chr17 | 0.279676513 | - T2D risk | Body    |
| cg02437766 | <i>ARL15</i>    | chr5  | 0.279821046 | + T2D risk | Body    |
| cg15027563 | <i>CLEC16A</i>  | chr16 | 0.279839706 | - T2D risk | TSS200  |
| cg01021234 | <i>ANK3</i>     | chr10 | 0.27984899  | - T2D risk | Body    |
| cg26238057 | <i>TENM2</i>    | chr5  | 0.279875915 | - T2D risk | Body    |
| cg20184106 | <i>OXSM</i>     | chr3  | 0.279980206 | - T2D risk | TSS200  |
| cg20184106 | <i>NGLY1</i>    | chr3  | 0.279980206 | - T2D risk | 1stExon |
| cg20184106 | <i>NGLY1</i>    | chr3  | 0.279980206 | - T2D risk | 5'UTR   |
| cg00375056 | <i>SSBP2</i>    | chr5  | 0.280041833 | + T2D risk | Body    |
| cg17109865 | <i>CREBBP</i>   | chr16 | 0.280072457 | + T2D risk | Body    |
| cg17949643 | <i>PDE3A</i>    | chr12 | 0.280090055 | - T2D risk | Body    |
| cg19450840 | <i>CALD1</i>    | chr7  | 0.280139113 | + T2D risk | 5'UTR   |
| cg11716471 | <i>TSHZ1</i>    | chr18 | 0.280248656 | + T2D risk | 5'UTR   |
| cg11716471 | <i>TSHZ1</i>    | chr18 | 0.280248656 | + T2D risk | Body    |
| cg20864959 | <i>ENAH</i>     | chr1  | 0.280376572 | - T2D risk | TSS1500 |
| cg01591591 | <i>CREBBP</i>   | chr16 | 0.280420511 | + T2D risk | Body    |
| cg12058544 | <i>PTPRU</i>    | chr1  | 0.28053276  | + T2D risk | Body    |
| cg04446284 | <i>CPLX2</i>    | chr5  | 0.280674067 | - T2D risk | 5'UTR   |
| cg16824225 | <i>TENM2</i>    | chr5  | 0.280818899 | + T2D risk | Body    |
| cg02261733 | <i>ARID2</i>    | chr12 | 0.280841378 | + T2D risk | 3'UTR   |
| cg23653008 | <i>CHFR</i>     | chr12 | 0.280910519 | - T2D risk | TSS1500 |
| cg20323015 | <i>HMBBOX1</i>  | chr8  | 0.280952188 | - T2D risk | 3'UTR   |
| cg04808420 | <i>USP53</i>    | chr4  | 0.280992433 | + T2D risk | TSS1500 |
| cg02833089 | <i>CUX1</i>     | chr7  | 0.281016358 | + T2D risk | Body    |
| cg08519109 | <i>SRPK2</i>    | chr7  | 0.281030021 | - T2D risk | Body    |
| cg09686236 | <i>KCNIP3</i>   | chr2  | 0.281073835 | - T2D risk | Body    |
| cg09686236 | <i>KCNIP3</i>   | chr2  | 0.281073835 | - T2D risk | TSS1500 |
| cg11726593 | <i>IMPA1</i>    | chr8  | 0.281169682 | + T2D risk | TSS1500 |
| cg18504656 | <i>DACH1</i>    | chr13 | 0.281349166 | - T2D risk | Body    |
| cg06946551 | <i>PTP4A2</i>   | chr1  | 0.281529355 | + T2D risk | 5'UTR   |
| cg09537015 | <i>NUP98</i>    | chr11 | 0.281639754 | + T2D risk | Body    |
| cg23261443 | <i>CUX1</i>     | chr7  | 0.281788931 | - T2D risk | Body    |
| cg13250196 | <i>MDM1</i>     | chr12 | 0.281903976 | - T2D risk | 3'UTR   |
| cg13250196 | <i>MDM1</i>     | chr12 | 0.281903976 | - T2D risk | Body    |
| cg03195732 | <i>KDM4B</i>    | chr19 | 0.281965325 | - T2D risk | Body    |
| cg07314038 | <i>SGSM2</i>    | chr17 | 0.281967037 | + T2D risk | 5'UTR   |
| cg07314038 | <i>SGSM2</i>    | chr17 | 0.281967037 | + T2D risk | 1stExon |
| cg26406407 | <i>DIP2C</i>    | chr10 | 0.281998936 | + T2D risk | Body    |
| cg02361546 | <i>PACS2</i>    | chr14 | 0.282067014 | - T2D risk | Body    |
| cg02361546 | <i>PACS2</i>    | chr14 | 0.282067014 | - T2D risk | 5'UTR   |
| cg05346287 | <i>DDC</i>      | chr7  | 0.282077507 | + T2D risk | 5'UTR   |
| cg20948548 | <i>SLIT3</i>    | chr5  | 0.282115653 | - T2D risk | Body    |
| cg10694153 | <i>RAP1GAP2</i> | chr17 | 0.282139795 | + T2D risk | Body    |
| cg17945231 | <i>KIAA0355</i> | chr19 | 0.282148529 | + T2D risk | Body    |
| cg16114442 | <i>ULK4</i>     | chr3  | 0.282270051 | - T2D risk | TSS1500 |
| cg24629311 | <i>KIAA0355</i> | chr19 | 0.282291066 | + T2D risk | Body    |



|            |          |       |             |            |         |
|------------|----------|-------|-------------|------------|---------|
| cg09935452 | ULK4     | chr3  | 0.282428874 | + T2D risk | Body    |
| cg13942215 | UXS1     | chr2  | 0.282563023 | + T2D risk | Body    |
| cg13942215 | UXS1     | chr2  | 0.282563023 | + T2D risk | TSS1500 |
| cg12411601 | DDC      | chr7  | 0.28275839  | + T2D risk | Body    |
| cg08167748 | GRK5     | chr10 | 0.282761888 | - T2D risk | Body    |
| cg12636835 | SEZ6L    | chr22 | 0.282853851 | + T2D risk | 3'UTR   |
| cg03133811 | CDH22    | chr20 | 0.282867336 | - T2D risk | Body    |
| cg04274830 | SCARB2   | chr4  | 0.283130424 | - T2D risk | Body    |
| cg19159985 | ANKHD1   | chr5  | 0.283194538 | + T2D risk | Body    |
| cg21525946 | TENM2    | chr5  | 0.28323151  | - T2D risk | Body    |
| cg04863508 | TMEM59   | chr1  | 0.283257842 | - T2D risk | TSS1500 |
| cg26571814 | PDE3A    | chr12 | 0.283272319 | - T2D risk | Body    |
| cg17520142 | SRPK2    | chr7  | 0.283298471 | - T2D risk | Body    |
| cg17520142 | SRPK2    | chr7  | 0.283298471 | - T2D risk | TSS1500 |
| cg11977795 | CMTR1    | chr6  | 0.283346758 | - T2D risk | ExonBnd |
| cg11977795 | CMTR1    | chr6  | 0.283346758 | - T2D risk | 5'UTR   |
| cg03440846 | ACSS2    | chr20 | 0.28344385  | + T2D risk | TSS1500 |
| cg21348925 | PRKCE    | chr2  | 0.283781097 | + T2D risk | Body    |
| cg25261191 | CUX1     | chr7  | 0.283793941 | - T2D risk | Body    |
| cg00699693 | WWP2     | chr16 | 0.283925692 | + T2D risk | Body    |
| cg01815376 | AMD1     | chr6  | 0.283934333 | - T2D risk | 5'UTR   |
| cg12027401 | TANC2    | chr17 | 0.28394296  | + T2D risk | Body    |
| cg02707048 | PACRG    | chr6  | 0.283962755 | - T2D risk | Body    |
| cg14123607 | APBA1    | chr9  | 0.284034673 | - T2D risk | 5'UTR   |
| cg17566334 | PACRG    | chr6  | 0.284123573 | - T2D risk | Body    |
| cg25237410 | CUX1     | chr7  | 0.284184573 | - T2D risk | Body    |
| cg21464353 | SCAF8    | chr6  | 0.284201235 | - T2D risk | Body    |
| cg09929879 | DIP2C    | chr10 | 0.284282716 | - T2D risk | Body    |
| cg09626265 | GLG1     | chr16 | 0.284369395 | - T2D risk | Body    |
| cg11699755 | NCOA2    | chr8  | 0.284475846 | + T2D risk | 5'UTR   |
| cg05226454 | DIP2C    | chr10 | 0.284548772 | + T2D risk | Body    |
| cg02393372 | GRK5     | chr10 | 0.28455224  | + T2D risk | Body    |
| cg08048137 | KREMEN1  | chr22 | 0.284593889 | - T2D risk | Body    |
| cg17881363 | ATXN1    | chr6  | 0.284659985 | + T2D risk | TSS200  |
| cg26908399 | RCAN2    | chr6  | 0.28466543  | - T2D risk | TSS1500 |
| cg25383568 | ACTN4    | chr19 | 0.284695142 | - T2D risk | Body    |
| cg27049987 | ZDHHC2   | chr8  | 0.284755216 | - T2D risk | TSS1500 |
| cg19288598 | TTC28    | chr22 | 0.284888217 | + T2D risk | Body    |
| cg09377512 | DNAH9    | chr17 | 0.285006815 | + T2D risk | 5'UTR   |
| cg09377512 | DNAH9    | chr17 | 0.285006815 | + T2D risk | Body    |
| cg13422119 | PDE8A    | chr15 | 0.28509686  | - T2D risk | Body    |
| cg22301377 | KCNIP3   | chr2  | 0.285157572 | + T2D risk | Body    |
| cg22301377 | KCNIP3   | chr2  | 0.285157572 | + T2D risk | TSS1500 |
| cg16232289 | KIAA1109 | chr4  | 0.285241398 | + T2D risk | Body    |
| cg01190084 | SKAP1    | chr17 | 0.285367393 | + T2D risk | Body    |
| cg01182310 | RANBP17  | chr5  | 0.285394501 | - T2D risk | Body    |
| cg07319098 | PDLIM5   | chr4  | 0.285520101 | - T2D risk | TSS200  |
| cg23078800 | ANK3     | chr10 | 0.28562558  | - T2D risk | Body    |
| cg22699725 | PFKFB2   | chr1  | 0.285895252 | + T2D risk | Body    |
| cg19214977 | RAP1GAP2 | chr17 | 0.285908576 | + T2D risk | Body    |
| cg13859097 | SKAP1    | chr17 | 0.285917015 | - T2D risk | Body    |
| cg09533708 | KCNIP3   | chr2  | 0.285954728 | - T2D risk | TSS1500 |
| cg23383887 | ANK2     | chr4  | 0.286067176 | - T2D risk | Body    |
| cg26564768 | DIP2C    | chr10 | 0.286106413 | - T2D risk | Body    |
| cg16489616 | PRKCE    | chr2  | 0.286154041 | + T2D risk | Body    |
| cg04927789 | TENM2    | chr5  | 0.28616123  | - T2D risk | Body    |
| cg05195377 | NCOA2    | chr8  | 0.286364648 | + T2D risk | 5'UTR   |
| cg11117097 | SLC7A2   | chr8  | 0.286470791 | - T2D risk | 5'UTR   |
| cg27390443 | CREBBP   | chr16 | 0.286519481 | + T2D risk | Body    |
| cg05654340 | AMD1     | chr6  | 0.286578576 | + T2D risk | 5'UTR   |
| cg05654340 | AMD1     | chr6  | 0.286578576 | + T2D risk | Body    |
| cg12356730 | PRKAG2   | chr7  | 0.286586911 | + T2D risk | 5'UTR   |
| cg12356730 | PRKAG2   | chr7  | 0.286586911 | + T2D risk | 1stExon |
| cg12356730 | PRKAG2   | chr7  | 0.286586911 | + T2D risk | Body    |
| cg08508761 | FLT1     | chr13 | 0.286637343 | + T2D risk | Body    |
| cg23204680 | ATXN1    | chr6  | 0.28666103  | - T2D risk | 5'UTR   |
| cg14013378 | PDLIM5   | chr4  | 0.286891455 | + T2D risk | Body    |
| cg06365577 | CREBBP   | chr16 | 0.286943316 | - T2D risk | Body    |
| cg09758680 | DIP2C    | chr10 | 0.287016179 | - T2D risk | Body    |
| cg07657658 | CNTNAP2  | chr7  | 0.287051934 | + T2D risk | Body    |



|               |          |       |             |            |         |
|---------------|----------|-------|-------------|------------|---------|
| cg23932241    | ARID2    | chr12 | 0.287071725 | - T2D risk | TSS1500 |
| cg04283838    | KIAA0232 | chr4  | 0.287128638 | - T2D risk | Body    |
| cg03562868    | PLAGL1   | chr6  | 0.287175777 | - T2D risk | TSS1500 |
| cg03562868    | PLAGL1   | chr6  | 0.287175777 | - T2D risk | 5'UTR   |
| cg06217931    | KDM4B    | chr19 | 0.287255188 | + T2D risk | Body    |
| cg22526076    | INPP4A   | chr2  | 0.28725854  | + T2D risk | 5'UTR   |
| cg13013301    | SGSM2    | chr17 | 0.287270319 | - T2D risk | Body    |
| cg23881119    | KIAA1217 | chr10 | 0.287271175 | - T2D risk | TSS1500 |
| cg23881119    | KIAA1217 | chr10 | 0.287271175 | - T2D risk | 5'UTR   |
| cg26463342    | ULK4     | chr3  | 0.28727709  | + T2D risk | Body    |
| cg14642696    | LMX1B    | chr9  | 0.287504164 | - T2D risk | Body    |
| cg08444060    | RSF1     | chr11 | 0.287504186 | - T2D risk | TSS200  |
| cg10106857    | ATXN1    | chr6  | 0.287517023 | - T2D risk | Body    |
| cg10090389    | USP53    | chr4  | 0.287588948 | + T2D risk | 5'UTR   |
| cg09443467    | TENM2    | chr5  | 0.287645085 | + T2D risk | Body    |
| cg12838902    | SLC29A4  | chr7  | 0.28777184  | + T2D risk | 5'UTR   |
| cg12838902    | SLC29A4  | chr7  | 0.28777184  | + T2D risk | 1stExon |
| cg24962317    | TMEM131  | chr2  | 0.287819445 | - T2D risk | Body    |
| cg10780097    | AMD1     | chr6  | 0.287843973 | - T2D risk | TSS1500 |
| cg16194292    | CUX1     | chr7  | 0.287849101 | + T2D risk | Body    |
| cg07959190    | KREMEN1  | chr22 | 0.288026351 | - T2D risk | Body    |
| cg14026061    | PRKCE    | chr2  | 0.288107906 | + T2D risk | Body    |
| cg13692416    | DIP2C    | chr10 | 0.288127774 | - T2D risk | Body    |
| cg11344729    | PRKAG2   | chr7  | 0.288142043 | + T2D risk | Body    |
| cg06582575    | PACRG    | chr6  | 0.288153202 | + T2D risk | 1stExon |
| cg06582575    | PACRG    | chr6  | 0.288153202 | + T2D risk | 5'UTR   |
| cg08712068    | PRKAG2   | chr7  | 0.288195261 | - T2D risk | TSS1500 |
| cg23504415    | AGPAT3   | chr21 | 0.288289822 | - T2D risk | 5'UTR   |
| cg02564272    | MAN1A1   | chr6  | 0.288352127 | + T2D risk | Body    |
| cg09313191    | DIP2C    | chr10 | 0.288353441 | - T2D risk | Body    |
| cg20405025    | CUX1     | chr7  | 0.288695462 | + T2D risk | Body    |
| cg26535070    | CLOCK    | chr4  | 0.288705329 | - T2D risk | Body    |
| cg21996137    | ATXN1    | chr6  | 0.288732025 | + T2D risk | TSS200  |
| cg25757393    | PDLIM5   | chr4  | 0.288826604 | + T2D risk | 5'UTR   |
| cg25757393    | PDLIM5   | chr4  | 0.288826604 | + T2D risk | Body    |
| cg11732505    | UXS1     | chr2  | 0.288954056 | - T2D risk | Body    |
| cg03787603    | CUX1     | chr7  | 0.288986995 | + T2D risk | Body    |
| cg20969033    | ANK2     | chr4  | 0.289060858 | - T2D risk | Body    |
| cg09731958    | DYNC111  | chr7  | 0.289191719 | - T2D risk | Body    |
| cg26671183    | PFKFB2   | chr1  | 0.289215751 | - T2D risk | TSS200  |
| cg02907102    | CUX2     | chr12 | 0.289469591 | + T2D risk | Body    |
| cg10423587    | DIP2C    | chr10 | 0.289537823 | + T2D risk | Body    |
| cg18998543    | GNA12    | chr7  | 0.289636474 | - T2D risk | 3'UTR   |
| cg02526950    | MET      | chr7  | 0.289652374 | - T2D risk | 5'UTR   |
| cg03164309    | SLC29A4  | chr7  | 0.289716909 | + T2D risk | Body    |
| cg01272967    | DIP2C    | chr10 | 0.289850195 | + T2D risk | Body    |
| cg26226356    | CUX2     | chr12 | 0.289904367 | - T2D risk | Body    |
| cg24649229    | AMD1     | chr6  | 0.289952168 | - T2D risk | 5'UTR   |
| cg22387076    | ZHX2     | chr8  | 0.290181616 | + T2D risk | 5'UTR   |
| cg02034675    | DKK2     | chr4  | 0.29022908  | + T2D risk | Body    |
| cg09933021    | FBXO11   | chr2  | 0.290249077 | - T2D risk | Body    |
| cg24630521    | ARL15    | chr5  | 0.29031385  | - T2D risk | Body    |
| cg06968641    | DIP2C    | chr10 | 0.290404016 | + T2D risk | Body    |
| cg03898690    | RAP1GAP2 | chr17 | 0.290456987 | - T2D risk | Body    |
| cg07028533    | CNTNAP2  | chr7  | 0.290487506 | + T2D risk | TSS200  |
| cg27363021    | DACH1    | chr13 | 0.290543406 | + T2D risk | Body    |
| cg14750751    | CUX2     | chr12 | 0.290691099 | - T2D risk | Body    |
| cg17860226    | CUX1     | chr7  | 0.290750676 | - T2D risk | Body    |
| cg00415665    | ZHX2     | chr8  | 0.290939918 | - T2D risk | 5'UTR   |
| cg26222689    | PRKCE    | chr2  | 0.290997091 | - T2D risk | Body    |
| cg21852905    | ASH1L    | chr1  | 0.291003505 | + T2D risk | 1stExon |
| cg21852905    | ASH1L    | chr1  | 0.291003505 | + T2D risk | 5'UTR   |
| cg03171157    | GRK5     | chr10 | 0.291005616 | + T2D risk | Body    |
| cg20567227    | ATP8A1   | chr4  | 0.291116895 | - T2D risk | Body    |
| cg03860010    | TJP1     | chr15 | 0.291189579 | - T2D risk | Body    |
| cg26896818    | PDE8A    | chr15 | 0.291228676 | - T2D risk | Body    |
| ch.7.3189261R | PRKAG2   | chr7  | 0.291431456 | - T2D risk | 5'UTR   |
| ch.7.3189261R | PRKAG2   | chr7  | 0.291431456 | - T2D risk | Body    |
| cg00048905    | DIP2C    | chr10 | 0.291473314 | + T2D risk | Body    |
| cg12975130    | SSBP2    | chr5  | 0.291578966 | + T2D risk | 3'UTR   |



|            |                 |       |             |            |         |
|------------|-----------------|-------|-------------|------------|---------|
| cg13076784 | <i>FBXO11</i>   | chr2  | 0.291675739 | - T2D risk | Body    |
| cg11855218 | <i>CRYL1</i>    | chr13 | 0.291708763 | + T2D risk | Body    |
| cg03038245 | <i>DIP2C</i>    | chr10 | 0.29175418  | - T2D risk | Body    |
| cg11884933 | <i>GNA12</i>    | chr7  | 0.291779803 | + T2D risk | Body    |
| cg13101284 | <i>SLIT3</i>    | chr5  | 0.291781186 | + T2D risk | Body    |
| cg01317470 | <i>FBXO11</i>   | chr2  | 0.291906233 | - T2D risk | Body    |
| cg26210511 | <i>EFCAB14</i>  | chr1  | 0.291938094 | + T2D risk | TSS1500 |
| cg04620298 | <i>CPLX2</i>    | chr5  | 0.292143359 | + T2D risk | 5'UTR   |
| cg21670451 | <i>ANKHD1</i>   | chr5  | 0.292257538 | - T2D risk | TSS200  |
| cg05181989 | <i>WWP2</i>     | chr16 | 0.292262547 | + T2D risk | TSS1500 |
| cg02800630 | <i>ANK2</i>     | chr4  | 0.292285684 | - T2D risk | Body    |
| cg01513605 | <i>TAB2</i>     | chr6  | 0.292509804 | + T2D risk | 5'UTR   |
| cg01513605 | <i>TAB2</i>     | chr6  | 0.292509804 | + T2D risk | Body    |
| cg04319464 | <i>PLAGL1</i>   | chr6  | 0.292649535 | + T2D risk | 5'UTR   |
| cg04319464 | <i>PLAGL1</i>   | chr6  | 0.292649535 | + T2D risk | 1stExon |
| cg10214615 | <i>LAMA4</i>    | chr6  | 0.292714239 | - T2D risk | Body    |
| cg04840930 | <i>PLAGL1</i>   | chr6  | 0.292824766 | - T2D risk | TSS1500 |
| cg04840930 | <i>PLAGL1</i>   | chr6  | 0.292824766 | - T2D risk | 5'UTR   |
| cg12419863 | <i>PLAGL1</i>   | chr6  | 0.292897669 | + T2D risk | Body    |
| cg14052289 | <i>ULK4</i>     | chr3  | 0.292959573 | - T2D risk | Body    |
| cg00204501 | <i>TJP1</i>     | chr15 | 0.293084335 | - T2D risk | 1stExon |
| cg00204501 | <i>TJP1</i>     | chr15 | 0.293084335 | - T2D risk | 5'UTR   |
| cg25604082 | <i>RET</i>      | chr10 | 0.293109796 | + T2D risk | Body    |
| cg23223071 | <i>PHACTR1</i>  | chr6  | 0.293342722 | - T2D risk | Body    |
| cg15989253 | <i>PICALM</i>   | chr11 | 0.29355138  | - T2D risk | TSS1500 |
| cg10439859 | <i>RHBDD1</i>   | chr2  | 0.293560101 | - T2D risk | Body    |
| cg15123499 | <i>DIP2C</i>    | chr10 | 0.293571446 | - T2D risk | Body    |
| cg01313057 | <i>PPFIBP1</i>  | chr12 | 0.293726585 | - T2D risk | 5'UTR   |
| cg00902429 | <i>ATXN1</i>    | chr6  | 0.293757258 | - T2D risk | 5'UTR   |
| cg12632309 | <i>ST6GAL1</i>  | chr3  | 0.293765771 | - T2D risk | 5'UTR   |
| cg20254607 | <i>POLA1</i>    | chrX  | 0.293783489 | - T2D risk | Body    |
| cg14980090 | <i>UXS1</i>     | chr2  | 0.294058603 | - T2D risk | TSS200  |
| cg20263741 | <i>RHBDD1</i>   | chr2  | 0.294162415 | + T2D risk | Body    |
| cg02293852 | <i>PTPRU</i>    | chr1  | 0.294385559 | + T2D risk | Body    |
| cg20163056 | <i>KDM4B</i>    | chr19 | 0.294609267 | + T2D risk | 5'UTR   |
| cg06072664 | <i>ATP8A2</i>   | chr13 | 0.294869258 | + T2D risk | Body    |
| cg10194279 | <i>ATXN1</i>    | chr6  | 0.294981363 | - T2D risk | 5'UTR   |
| cg04895047 | <i>AGPAT3</i>   | chr21 | 0.295116407 | - T2D risk | Body    |
| cg20305610 | <i>PDLIM5</i>   | chr4  | 0.295117895 | - T2D risk | 5'UTR   |
| cg20305610 | <i>PDLIM5</i>   | chr4  | 0.295117895 | - T2D risk | Body    |
| cg13800491 | <i>FLT1</i>     | chr13 | 0.295208388 | - T2D risk | Body    |
| cg24374900 | <i>PDE8A</i>    | chr15 | 0.295277923 | - T2D risk | TSS1500 |
| cg12240515 | <i>EFR3A</i>    | chr8  | 0.295306464 | + T2D risk | Body    |
| cg04495969 | <i>FBXO11</i>   | chr2  | 0.295408773 | + T2D risk | 5'UTR   |
| cg06065769 | <i>INPP4A</i>   | chr2  | 0.295419529 | - T2D risk | 5'UTR   |
| cg02910405 | <i>PACS1</i>    | chr11 | 0.295434191 | - T2D risk | Body    |
| cg14725733 | <i>DIP2C</i>    | chr10 | 0.295467982 | - T2D risk | Body    |
| cg09787619 | <i>PRKACB</i>   | chr1  | 0.295547243 | + T2D risk | Body    |
| cg20029849 | <i>RAP1GAP2</i> | chr17 | 0.29559188  | + T2D risk | Body    |
| cg11912239 | <i>BIRC5</i>    | chr17 | 0.295662307 | + T2D risk | 3'UTR   |
| cg05349356 | <i>ATRNL</i>    | chr20 | 0.295735594 | + T2D risk | TSS200  |
| cg06404238 | <i>CUX1</i>     | chr7  | 0.295827717 | - T2D risk | Body    |
| cg18502238 | <i>DIP2C</i>    | chr10 | 0.295834116 | + T2D risk | Body    |
| cg07703765 | <i>ACTN4</i>    | chr19 | 0.295854723 | + T2D risk | Body    |
| cg15546232 | <i>TSGA10</i>   | chr2  | 0.295896754 | - T2D risk | 5'UTR   |
| cg15546232 | <i>TSGA10</i>   | chr2  | 0.295896754 | - T2D risk | 1stExon |
| cg03223765 | <i>CHKA</i>     | chr11 | 0.296185634 | + T2D risk | Body    |
| cg24962011 | <i>DIP2C</i>    | chr10 | 0.296257315 | - T2D risk | Body    |
| cg03296248 | <i>COL4A1</i>   | chr13 | 0.296337351 | + T2D risk | Body    |
| cg08783063 | <i>RSF1</i>     | chr11 | 0.296374414 | - T2D risk | Body    |
| cg17578322 | <i>ERC2</i>     | chr3  | 0.296378403 | - T2D risk | 3'UTR   |
| cg05526846 | <i>INPP4A</i>   | chr2  | 0.29641682  | - T2D risk | 5'UTR   |
| cg03581459 | <i>PACS2</i>    | chr14 | 0.296510471 | + T2D risk | TSS1500 |
| cg06240854 | <i>TSGA10</i>   | chr2  | 0.296550509 | - T2D risk | 5'UTR   |
| cg05371064 | <i>MAN1A1</i>   | chr6  | 0.296641912 | - T2D risk | TSS1500 |
| cg22284398 | <i>PRKCE</i>    | chr2  | 0.296650344 | + T2D risk | Body    |
| cg21514227 | <i>NOTCH3</i>   | chr19 | 0.296697842 | + T2D risk | Body    |
| cg03979024 | <i>DIP2C</i>    | chr10 | 0.296795703 | + T2D risk | Body    |
| cg03455912 | <i>ACSS2</i>    | chr20 | 0.29684206  | - T2D risk | TSS1500 |
| cg10541139 | <i>ENAH</i>     | chr1  | 0.296894285 | + T2D risk | Body    |



|            |          |       |             |            |         |
|------------|----------|-------|-------------|------------|---------|
| cg15262516 | COL4A1   | chr13 | 0.2969095   | - T2D risk | Body    |
| cg18082894 | PRKACB   | chr1  | 0.297143693 | - T2D risk | Body    |
| cg12064947 | DLL4     | chr15 | 0.297343344 | - T2D risk | TSS1500 |
| cg09712329 | ATRN     | chr20 | 0.297451343 | + T2D risk | Body    |
| cg05902801 | CUX2     | chr12 | 0.29746435  | - T2D risk | Body    |
| cg07865517 | PLEKHG3  | chr14 | 0.297501342 | - T2D risk | TSS1500 |
| cg08065241 | ERC2     | chr3  | 0.297607279 | - T2D risk | 5'UTR   |
| cg23536300 | PPP1R12A | chr12 | 0.297634127 | + T2D risk | Body    |
| cg23536300 | PPP1R12A | chr12 | 0.297634127 | + T2D risk | 1stExon |
| cg16493124 | ASXL2    | chr2  | 0.297656433 | - T2D risk | Body    |
| cg17725607 | PTPRU    | chr1  | 0.297714872 | + T2D risk | Body    |
| cg17767427 | KDM4B    | chr19 | 0.297738732 | - T2D risk | Body    |
| cg14848333 | ASH1L    | chr1  | 0.297856767 | - T2D risk | Body    |
| cg11345010 | AGPAT3   | chr21 | 0.298129822 | - T2D risk | 5'UTR   |
| cg17019362 | PDE3A    | chr12 | 0.298365648 | + T2D risk | Body    |
| cg17019362 | PDE3A    | chr12 | 0.298365648 | + T2D risk | TSS200  |
| cg00729815 | ATP2B1   | chr12 | 0.298403118 | - T2D risk | Body    |
| cg12565055 | TTC28    | chr22 | 0.298463053 | - T2D risk | TSS1500 |
| cg12744722 | CUX2     | chr12 | 0.298533395 | + T2D risk | Body    |
| cg10665789 | ITPKB    | chr1  | 0.298545297 | - T2D risk | Body    |
| cg21341821 | DIP2C    | chr10 | 0.298600992 | - T2D risk | Body    |
| cg01625998 | TMEM219  | chr16 | 0.29876176  | + T2D risk | 5'UTR   |
| cg08527313 | PTPRU    | chr1  | 0.298904018 | - T2D risk | Body    |
| cg00744866 | CLASP2   | chr3  | 0.299064481 | - T2D risk | Body    |
| cg15487208 | ARL15    | chr5  | 0.299101103 | - T2D risk | Body    |
| cg02791664 | SCAF11   | chr12 | 0.299451161 | + T2D risk | Body    |
| cg03554765 | SPOCK1   | chr5  | 0.299491738 | - T2D risk | TSS1500 |
| cg27390840 | SLIT3    | chr5  | 0.299578992 | - T2D risk | Body    |
| cg15475168 | CUX1     | chr7  | 0.299616922 | - T2D risk | Body    |
| cg26710819 | CALD1    | chr7  | 0.299620502 | - T2D risk | 3'UTR   |
| cg24545602 | PRKCE    | chr2  | 0.299645138 | + T2D risk | Body    |
| cg00408980 | HMBOX1   | chr8  | 0.299757271 | + T2D risk | 5'UTR   |
| cg00408980 | HMBOX1   | chr8  | 0.299757271 | + T2D risk | ExonBnd |
| cg10784597 | NOL4     | chr18 | 0.300047568 | + T2D risk | Body    |
| cg02038353 | SUB1     | chr5  | 0.30006437  | - T2D risk | TSS1500 |
| cg11505026 | PRKCE    | chr2  | 0.300104903 | - T2D risk | Body    |
| cg04395439 | TENM2    | chr5  | 0.300165516 | - T2D risk | Body    |
| cg15720797 | PDLIM5   | chr4  | 0.300184648 | - T2D risk | Body    |
| cg06715974 | RAP1B    | chr12 | 0.300221247 | - T2D risk | 5'UTR   |
| cg24760597 | ANK3     | chr10 | 0.300231021 | - T2D risk | Body    |
| cg02057782 | ATP8A2   | chr13 | 0.300252246 | - T2D risk | Body    |
| cg23185029 | PRKAG2   | chr7  | 0.300295634 | + T2D risk | TSS1500 |
| cg23185029 | PRKAG2   | chr7  | 0.300295634 | + T2D risk | Body    |
| cg07819331 | SLIT3    | chr5  | 0.300349186 | - T2D risk | Body    |
| cg18132241 | ATP8A2   | chr13 | 0.300431535 | - T2D risk | Body    |
| cg07973479 | ATP8A2   | chr13 | 0.3004793   | + T2D risk | TSS1500 |
| cg01857931 | LAP3     | chr4  | 0.300584093 | - T2D risk | Body    |
| cg16673301 | CADM1    | chr11 | 0.300614032 | - T2D risk | Body    |
| cg05125455 | CADM1    | chr11 | 0.300617884 | - T2D risk | Body    |
| cg03386480 | DYNC111  | chr7  | 0.30063099  | + T2D risk | TSS200  |
| cg03508526 | ZDHHC2   | chr8  | 0.300656734 | - T2D risk | Body    |
| cg20330224 | UXS1     | chr2  | 0.300719971 | + T2D risk | Body    |
| cg19112780 | PTPRU    | chr1  | 0.300834626 | - T2D risk | 1stExon |
| cg19112780 | PTPRU    | chr1  | 0.300834626 | - T2D risk | 5'UTR   |
| cg24816866 | PACRG    | chr6  | 0.300905542 | + T2D risk | Body    |
| cg24013909 | PTPRU    | chr1  | 0.301021959 | - T2D risk | Body    |
| cg16785827 | ARL8B    | chr3  | 0.301022747 | - T2D risk | Body    |
| cg01254555 | LAMA4    | chr6  | 0.301193857 | + T2D risk | Body    |
| cg22239322 | TENM2    | chr5  | 0.301215663 | - T2D risk | Body    |
| cg08431272 | TPCN1    | chr12 | 0.3012812   | + T2D risk | 5'UTR   |
| cg08431272 | TPCN1    | chr12 | 0.3012812   | + T2D risk | Body    |
| cg17331706 | RGS7     | chr1  | 0.301288403 | + T2D risk | Body    |
| cg17331706 | RGS7     | chr1  | 0.301288403 | + T2D risk | 3'UTR   |
| cg16509430 | ATXN1    | chr6  | 0.301305437 | + T2D risk | 5'UTR   |
| cg18306520 | ARID2    | chr12 | 0.301310438 | + T2D risk | TSS200  |
| cg07992484 | UXS1     | chr2  | 0.301357382 | + T2D risk | Body    |
| cg27029179 | CADM1    | chr11 | 0.301372175 | + T2D risk | TSS1500 |
| cg22389121 | ST20     | chr15 | 0.301496145 | - T2D risk | TSS1500 |
| cg24312492 | ASH1L    | chr1  | 0.301523238 | - T2D risk | TSS200  |
| cg17983891 | TSGA10   | chr2  | 0.301680524 | - T2D risk | 1stExon |



|            |           |       |             |            |         |
|------------|-----------|-------|-------------|------------|---------|
| cg17983891 | TSGA10    | chr2  | 0.301680524 | - T2D risk | 5'UTR   |
| cg04477101 | SGSM2     | chr17 | 0.301693436 | - T2D risk | Body    |
| cg15163417 | TANC2     | chr17 | 0.301731764 | - T2D risk | Body    |
| cg20823215 | RSF1      | chr11 | 0.30188947  | + T2D risk | Body    |
| cg07675216 | PRKACB    | chr1  | 0.302048653 | - T2D risk | Body    |
| cg21222767 | DNAH9     | chr17 | 0.302061825 | + T2D risk | Body    |
| cg03995533 | CLEC16A   | chr16 | 0.302119234 | + T2D risk | Body    |
| cg02578070 | MAN1A1    | chr6  | 0.302126139 | + T2D risk | Body    |
| cg04451134 | PDE3A     | chr12 | 0.302137871 | - T2D risk | Body    |
| cg04451134 | PDE3A     | chr12 | 0.302137871 | - T2D risk | TSS1500 |
| cg09732704 | CLEC16A   | chr16 | 0.302256679 | - T2D risk | Body    |
| cg10850893 | ZDHHC2    | chr8  | 0.302312318 | - T2D risk | Body    |
| cg15487282 | GALK2     | chr15 | 0.302393247 | - T2D risk | Body    |
| cg13151724 | RBBP6     | chr16 | 0.302530407 | + T2D risk | 5'UTR   |
| cg13151724 | RBBP6     | chr16 | 0.302530407 | + T2D risk | 1stExon |
| cg25578013 | CRYL1     | chr13 | 0.302553385 | + T2D risk | Body    |
| cg18918010 | ZHX2      | chr8  | 0.302561706 | - T2D risk | 5'UTR   |
| cg25553110 | ZHX2      | chr8  | 0.302621702 | + T2D risk | Body    |
| cg14012925 | CUX1      | chr7  | 0.302622993 | - T2D risk | Body    |
| cg21849597 | ARPP19    | chr15 | 0.302713469 | + T2D risk | TSS1500 |
| cg25719450 | PDK1      | chr2  | 0.302764275 | + T2D risk | TSS1500 |
| cg26212303 | DLL4      | chr15 | 0.302921744 | + T2D risk | TSS1500 |
| cg24498114 | NOTCH3    | chr19 | 0.303115323 | - T2D risk | Body    |
| cg08602888 | UXS1      | chr2  | 0.303129833 | + T2D risk | Body    |
| cg26157192 | ANK3      | chr10 | 0.303171076 | - T2D risk | Body    |
| cg12720670 | CUX1      | chr7  | 0.303340262 | - T2D risk | Body    |
| cg15683743 | SPPL2A    | chr15 | 0.303371374 | + T2D risk | Body    |
| cg10971973 | FNIP2     | chr4  | 0.303427841 | + T2D risk | Body    |
| cg05263760 | PHACTR1   | chr6  | 0.30344036  | - T2D risk | Body    |
| cg04058144 | GLG1      | chr16 | 0.303513435 | + T2D risk | Body    |
| cg14884935 | RNF217    | chr6  | 0.30361079  | + T2D risk | Body    |
| cg09773769 | GPC4      | chrX  | 0.303720743 | + T2D risk | Body    |
| cg11613015 | APC       | chr5  | 0.303752178 | - T2D risk | 5'UTR   |
| cg11613015 | APC       | chr5  | 0.303752178 | - T2D risk | TSS200  |
| cg06071396 | SLIT3     | chr5  | 0.303809367 | - T2D risk | Body    |
| cg22810137 | EVI5      | chr1  | 0.303839993 | - T2D risk | Body    |
| cg08052619 | TMEM150C  | chr4  | 0.303874327 | + T2D risk | TSS1500 |
| cg04483289 | SKAP1     | chr17 | 0.303945571 | - T2D risk | TSS1500 |
| cg04699519 | ATXN1     | chr6  | 0.303949933 | + T2D risk | 3'UTR   |
| cg01160733 | DDHD2     | chr8  | 0.303956941 | - T2D risk | Body    |
| cg05388548 | PHACTR1   | chr6  | 0.304025386 | + T2D risk | Body    |
| cg25592746 | SLIT3     | chr5  | 0.304101153 | + T2D risk | Body    |
| cg19460902 | ATXN1     | chr6  | 0.30415064  | + T2D risk | 5'UTR   |
| cg02892618 | HNRNPA2B1 | chr7  | 0.30433666  | + T2D risk | Body    |
| cg10156207 | GALK2     | chr15 | 0.304378193 | - T2D risk | Body    |
| cg25734899 | DIP2C     | chr10 | 0.304433698 | + T2D risk | Body    |
| cg17435796 | RGS7      | chr1  | 0.304465682 | - T2D risk | Body    |
| cg26562578 | SGSM2     | chr17 | 0.304474746 | + T2D risk | Body    |
| cg01183713 | ULK4      | chr3  | 0.304534188 | - T2D risk | Body    |
| cg00615852 | AMD1      | chr6  | 0.304650476 | - T2D risk | 5'UTR   |
| cg17999272 | SPAG9     | chr17 | 0.304691969 | - T2D risk | Body    |
| cg17999272 | SPAG9     | chr17 | 0.304691969 | - T2D risk | ExonBnd |
| cg23575731 | CUX1      | chr7  | 0.30469633  | - T2D risk | Body    |
| cg16334882 | CLEC16A   | chr16 | 0.30493491  | + T2D risk | Body    |
| cg11050992 | RGS7      | chr1  | 0.305052177 | - T2D risk | Body    |
| cg11050992 | RGS7      | chr1  | 0.305052177 | - T2D risk | 3'UTR   |
| cg24629941 | CUX1      | chr7  | 0.305125818 | - T2D risk | Body    |
| cg05031214 | RAP1GAP2  | chr17 | 0.305240835 | + T2D risk | TSS1500 |
| cg07484986 | ANK3      | chr10 | 0.305315778 | - T2D risk | Body    |
| cg12694124 | TSC22D1   | chr13 | 0.305412084 | + T2D risk | Body    |
| cg13979277 | LMX1B     | chr9  | 0.305497622 | - T2D risk | Body    |
| cg02215538 | ANKHD1    | chr5  | 0.30554995  | + T2D risk | Body    |
| cg13708206 | SLIT3     | chr5  | 0.305828608 | + T2D risk | Body    |
| cg02957270 | SKAP1     | chr17 | 0.305917941 | + T2D risk | TSS1500 |
| cg07651080 | ROBO2     | chr3  | 0.30594004  | + T2D risk | TSS1500 |
| cg07651080 | ROBO2     | chr3  | 0.30594004  | + T2D risk | Body    |
| cg23335258 | TMEM219   | chr16 | 0.306005772 | - T2D risk | 5'UTR   |
| cg15170386 | CUX1      | chr7  | 0.306124764 | + T2D risk | Body    |
| cg23268576 | ATXN1     | chr6  | 0.306145261 | - T2D risk | 5'UTR   |
| cg08074000 | MET       | chr7  | 0.306281225 | + T2D risk | Body    |



|            |          |       |             |            |         |
|------------|----------|-------|-------------|------------|---------|
| cg20715291 | INPP4A   | chr2  | 0.306366828 | - T2D risk | TSS1500 |
| cg06007761 | SLIT3    | chr5  | 0.306407784 | - T2D risk | Body    |
| cg14486019 | PRKCE    | chr2  | 0.306409933 | - T2D risk | Body    |
| cg00906616 | PRKAG2   | chr7  | 0.306596705 | + T2D risk | Body    |
| cg04188753 | KIAA1217 | chr10 | 0.306647246 | - T2D risk | Body    |
| cg26321127 | AGPAT3   | chr21 | 0.306713076 | - T2D risk | 5'UTR   |
| cg26321127 | AGPAT3   | chr21 | 0.306713076 | - T2D risk | TSS1500 |
| cg10541043 | CUX1     | chr7  | 0.306727512 | - T2D risk | 3'UTR   |
| cg10541043 | CUX1     | chr7  | 0.306727512 | - T2D risk | Body    |
| cg12488877 | TBC1D5   | chr3  | 0.30688307  | + T2D risk | TSS200  |
| cg01139696 | GNA12    | chr7  | 0.307143274 | - T2D risk | Body    |
| cg12127692 | INPP4A   | chr2  | 0.307166901 | + T2D risk | 5'UTR   |
| cg21477922 | KIAA0232 | chr4  | 0.307244653 | - T2D risk | TSS200  |
| cg13952688 | KCNJ12   | chr17 | 0.307271092 | + T2D risk | 5'UTR   |
| cg07393320 | CPLX2    | chr5  | 0.307394879 | + T2D risk | 5'UTR   |
| cg14430158 | TENM2    | chr5  | 0.307399968 | + T2D risk | Body    |
| cg23109041 | PACS2    | chr14 | 0.307541423 | - T2D risk | Body    |
| cg04196549 | TSC22D1  | chr13 | 0.307733509 | - T2D risk | TSS1500 |
| cg04196549 | TSC22D1  | chr13 | 0.307733509 | - T2D risk | 5'UTR   |
| cg04196549 | TSC22D1  | chr13 | 0.307733509 | - T2D risk | Body    |
| cg25858805 | KCNJ18   | chr17 | 0.307751298 | + T2D risk | TSS1500 |
| cg25858805 | KCNJ12   | chr17 | 0.307751298 | + T2D risk | 5'UTR   |
| cg12221970 | ITPKB    | chr1  | 0.3078644   | + T2D risk | Body    |
| cg09401276 | BCAT1    | chr12 | 0.307980343 | + T2D risk | Body    |
| cg15611364 | OXSM     | chr3  | 0.308022484 | - T2D risk | TSS200  |
| cg15611364 | NGLY1    | chr3  | 0.308022484 | - T2D risk | 1stExon |
| cg15611364 | NGLY1    | chr3  | 0.308022484 | - T2D risk | 5'UTR   |
| cg26339042 | SEZ6L    | chr22 | 0.308084957 | + T2D risk | Body    |
| cg08135718 | CUX1     | chr7  | 0.308136891 | - T2D risk | Body    |
| cg19709083 | CUL1     | chr7  | 0.308263806 | + T2D risk | 3'UTR   |
| cg26673019 | USP53    | chr4  | 0.308347811 | + T2D risk | 5'UTR   |
| cg02510467 | GAD1     | chr2  | 0.308353438 | - T2D risk | 5'UTR   |
| cg05119810 | CHFR     | chr12 | 0.308354932 | + T2D risk | Body    |
| cg01340195 | TBC1D5   | chr3  | 0.308367289 | + T2D risk | 5'UTR   |
| cg01329098 | RTN4     | chr2  | 0.308415055 | - T2D risk | Body    |
| cg21266942 | CUX1     | chr7  | 0.308489298 | - T2D risk | Body    |
| cg12169153 | CREBBP   | chr16 | 0.308546837 | + T2D risk | Body    |
| cg09488184 | KCNJ12   | chr17 | 0.30866153  | - T2D risk | 5'UTR   |
| cg21090457 | ROBO2    | chr3  | 0.308670101 | - T2D risk | Body    |
| cg14752915 | TOP2A    | chr17 | 0.308671077 | + T2D risk | Body    |
| cg00875000 | ATXN1    | chr6  | 0.308673071 | - T2D risk | 5'UTR   |
| cg05134054 | CUX2     | chr12 | 0.308813059 | - T2D risk | Body    |
| cg19255681 | ERC2     | chr3  | 0.308865209 | + T2D risk | Body    |
| cg10403260 | PHF21A   | chr11 | 0.308912397 | - T2D risk | 5'UTR   |
| cg10403260 | PHF21A   | chr11 | 0.308912397 | - T2D risk | 1stExon |
| cg19310375 | ACSS2    | chr20 | 0.308926077 | - T2D risk | Body    |
| cg19310375 | ACSS2    | chr20 | 0.308926077 | - T2D risk | 1stExon |
| cg23873669 | RANBP17  | chr5  | 0.308965181 | - T2D risk | Body    |
| cg05525455 | ARHGAP32 | chr11 | 0.308972695 | - T2D risk | 3'UTR   |
| cg12859234 | DDHD2    | chr8  | 0.309141242 | + T2D risk | 5'UTR   |
| cg12859234 | DDHD2    | chr8  | 0.309141242 | + T2D risk | 1stExon |
| cg24420703 | ATP6V1A  | chr3  | 0.309165502 | + T2D risk | 5'UTR   |
| cg22235600 | SGSM2    | chr17 | 0.309417388 | - T2D risk | Body    |
| cg11351927 | DIP2C    | chr10 | 0.309459625 | - T2D risk | Body    |
| cg17005864 | TENM2    | chr5  | 0.309528044 | - T2D risk | Body    |
| cg22424122 | PPP1R12A | chr12 | 0.309546523 | - T2D risk | Body    |
| cg02699933 | ARHGAP32 | chr11 | 0.309636613 | - T2D risk | Body    |
| cg25163086 | CADM1    | chr11 | 0.309673223 | - T2D risk | Body    |
| cg05512869 | LAMA4    | chr6  | 0.309677764 | - T2D risk | Body    |
| cg03782461 | FAM160A1 | chr4  | 0.309815649 | + T2D risk | 5'UTR   |
| cg10983639 | PRKCB    | chr16 | 0.309942108 | + T2D risk | Body    |
| cg20699740 | TMEM59   | chr1  | 0.310178242 | + T2D risk | 5'UTR   |
| cg20699740 | TMEM59   | chr1  | 0.310178242 | + T2D risk | Body    |
| cg03053738 | PHF21A   | chr11 | 0.310269879 | - T2D risk | Body    |
| cg03879823 | PHACTR1  | chr6  | 0.310365459 | - T2D risk | Body    |
| cg22821606 | RSF1     | chr11 | 0.310382272 | - T2D risk | TSS1500 |
| cg26981180 | FNIP2    | chr4  | 0.310390265 | - T2D risk | Body    |
| cg04950452 | TENM2    | chr5  | 0.310690557 | - T2D risk | Body    |
| cg17443058 | FLT1     | chr13 | 0.310782118 | - T2D risk | Body    |
| cg22160502 | YWHAQ    | chr2  | 0.310829009 | - T2D risk | Body    |



|               |          |       |             |            |         |
|---------------|----------|-------|-------------|------------|---------|
| cg16569650    | GNA12    | chr7  | 0.310873903 | - T2D risk | Body    |
| cg23657143    | HMBOX1   | chr8  | 0.310941536 | + T2D risk | 5'UTR   |
| cg09990242    | ST6GAL1  | chr3  | 0.310973565 | - T2D risk | 5'UTR   |
| cg19501306    | PACS2    | chr14 | 0.311060058 | + T2D risk | Body    |
| cg19501306    | PACS2    | chr14 | 0.311060058 | + T2D risk | 5'UTR   |
| cg18836581    | PACRG    | chr6  | 0.311290329 | - T2D risk | Body    |
| cg11056055    | MET      | chr7  | 0.31130322  | - T2D risk | Body    |
| cg15985580    | GRK5     | chr10 | 0.311415578 | + T2D risk | Body    |
| cg07635227    | MGRN1    | chr16 | 0.311433499 | + T2D risk | Body    |
| cg04198075    | DIP2C    | chr10 | 0.311452467 | + T2D risk | Body    |
| cg19488093    | CALD1    | chr7  | 0.311497353 | - T2D risk | 1stExon |
| cg19488093    | CALD1    | chr7  | 0.311497353 | - T2D risk | Body    |
| cg19488093    | CALD1    | chr7  | 0.311497353 | - T2D risk | 5'UTR   |
| cg26482626    | PRKAG2   | chr7  | 0.311775457 | + T2D risk | TSS1500 |
| cg26482626    | PRKAG2   | chr7  | 0.311775457 | + T2D risk | Body    |
| cg15496985    | TSGA10   | chr2  | 0.311835439 | - T2D risk | TSS200  |
| cg26499095    | DIP2C    | chr10 | 0.311843037 | + T2D risk | Body    |
| cg00728039    | AMD1     | chr6  | 0.311914706 | - T2D risk | 5'UTR   |
| cg03396151    | MEIS2    | chr15 | 0.311964088 | - T2D risk | Body    |
| cg03844372    | KIAA1217 | chr10 | 0.312003704 | + T2D risk | 5'UTR   |
| cg15369381    | TANC2    | chr17 | 0.312252277 | + T2D risk | Body    |
| cg25054043    | RHOA     | chr3  | 0.312262261 | + T2D risk | Body    |
| cg09690543    | CLIC5    | chr6  | 0.312291442 | - T2D risk | Body    |
| cg27017357    | KDM4B    | chr19 | 0.312325534 | + T2D risk | 5'UTR   |
| cg24374051    | GLG1     | chr16 | 0.312360381 | + T2D risk | Body    |
| cg20125846    | PACRG    | chr6  | 0.312362433 | - T2D risk | Body    |
| cg09950921    | STX6     | chr1  | 0.312413781 | - T2D risk | 5'UTR   |
| cg09950921    | STX6     | chr1  | 0.312413781 | - T2D risk | Body    |
| cg25244800    | MEIS2    | chr15 | 0.312440387 | - T2D risk | Body    |
| cg25536136    | RGS7     | chr1  | 0.312476408 | + T2D risk | Body    |
| cg15306863    | DIP2C    | chr10 | 0.312521777 | + T2D risk | Body    |
| cg09302897    | SCARB2   | chr4  | 0.312659989 | + T2D risk | Body    |
| cg14785205    | CPLX2    | chr5  | 0.312674523 | + T2D risk | 5'UTR   |
| cg00122765    | NF1      | chr17 | 0.312812689 | + T2D risk | Body    |
| cg17196246    | BCAT1    | chr12 | 0.312830452 | - T2D risk | Body    |
| cg02242527    | RCAN2    | chr6  | 0.312857618 | - T2D risk | TSS1500 |
| cg02242527    | RCAN2    | chr6  | 0.312857618 | - T2D risk | Body    |
| cg09981407    | RAP1GAP2 | chr17 | 0.312902309 | + T2D risk | TSS1500 |
| cg18843773    | DDC      | chr7  | 0.312940726 | - T2D risk | Body    |
| cg25447144    | MEIS2    | chr15 | 0.312981287 | - T2D risk | Body    |
| cg08376530    | PACRG    | chr6  | 0.312985839 | - T2D risk | Body    |
| cg09468912    | NCOA2    | chr8  | 0.312992892 | + T2D risk | TSS1500 |
| cg07409747    | ASXL2    | chr2  | 0.313004966 | - T2D risk | Body    |
| cg23871260    | AMD1     | chr6  | 0.313014076 | - T2D risk | 5'UTR   |
| cg02614932    | DIP2C    | chr10 | 0.31329578  | - T2D risk | Body    |
| cg03667968    | APC      | chr5  | 0.313337735 | - T2D risk | 5'UTR   |
| cg03667968    | APC      | chr5  | 0.313337735 | - T2D risk | TSS200  |
| cg10255171    | ATXN1    | chr6  | 0.313387267 | - T2D risk | Body    |
| cg01283398    | KIAA1217 | chr10 | 0.31346107  | - T2D risk | Body    |
| cg17862404    | TSC22D1  | chr13 | 0.313498449 | + T2D risk | Body    |
| cg16177187    | ITPKB    | chr1  | 0.313516922 | + T2D risk | Body    |
| cg25902639    | NOTCH3   | chr19 | 0.313793516 | + T2D risk | TSS1500 |
| cg02076100    | ROBO2    | chr3  | 0.31383358  | + T2D risk | 5'UTR   |
| cg02076100    | ROBO2    | chr3  | 0.31383358  | + T2D risk | Body    |
| cg15647266    | ANK3     | chr10 | 0.313927268 | + T2D risk | Body    |
| cg13635931    | SSB      | chr2  | 0.313963845 | - T2D risk | TSS1500 |
| cg02092785    | PHACTR1  | chr6  | 0.313987833 | + T2D risk | Body    |
| cg17359198    | PRKAG2   | chr7  | 0.314002314 | + T2D risk | 5'UTR   |
| cg17359198    | PRKAG2   | chr7  | 0.314002314 | + T2D risk | Body    |
| cg27063425    | KIAA1217 | chr10 | 0.314004845 | + T2D risk | Body    |
| cg06765630    | CDH22    | chr20 | 0.314008795 | - T2D risk | Body    |
| cg09529437    | PRKCB    | chr16 | 0.314011567 | + T2D risk | Body    |
| cg14898547    | SPPL2A   | chr15 | 0.314062512 | + T2D risk | Body    |
| ch.2.4457098R | FARSB    | chr2  | 0.314065138 | + T2D risk | Body    |
| cg03866192    | RAP1GAP2 | chr17 | 0.314385523 | - T2D risk | TSS200  |
| cg05104811    | PACRG    | chr6  | 0.314449149 | + T2D risk | Body    |
| cg25902202    | CUX2     | chr12 | 0.31503416  | - T2D risk | Body    |
| cg20606185    | ANK3     | chr10 | 0.315084195 | - T2D risk | Body    |
| cg08299464    | CDH22    | chr20 | 0.315087709 | + T2D risk | Body    |
| cg18373615    | KIAA1217 | chr10 | 0.315178013 | - T2D risk | 5'UTR   |



|            |                 |       |             |            |         |
|------------|-----------------|-------|-------------|------------|---------|
| cg09048009 | <i>RTN4</i>     | chr2  | 0.315186137 | - T2D risk | Body    |
| cg04485603 | <i>CLOCK</i>    | chr4  | 0.315283035 | + T2D risk | 5'UTR   |
| cg15787544 | <i>PRKAG2</i>   | chr7  | 0.315345277 | + T2D risk | 5'UTR   |
| cg15787544 | <i>PRKAG2</i>   | chr7  | 0.315345277 | + T2D risk | Body    |
| cg21902150 | <i>SH3GL2</i>   | chr9  | 0.315460652 | + T2D risk | Body    |
| cg05901503 | <i>TENM2</i>    | chr5  | 0.315512138 | - T2D risk | Body    |
| cg24888214 | <i>ARHGAP32</i> | chr11 | 0.315576704 | + T2D risk | Body    |
| cg27115439 | <i>PDE3A</i>    | chr12 | 0.315578391 | + T2D risk | Body    |
| cg08263357 | <i>PLAGL1</i>   | chr6  | 0.315815243 | - T2D risk | TSS1500 |
| cg08263357 | <i>PLAGL1</i>   | chr6  | 0.315815243 | - T2D risk | 5'UTR   |
| cg14761454 | <i>NPAT</i>     | chr11 | 0.315825431 | - T2D risk | Body    |
| cg02034890 | <i>WWP2</i>     | chr16 | 0.315979654 | - T2D risk | 5'UTR   |
| cg05168404 | <i>SLC29A4</i>  | chr7  | 0.315986802 | - T2D risk | TSS1500 |
| cg27252233 | <i>SSB</i>      | chr2  | 0.316099752 | + T2D risk | 5'UTR   |
| cg13610262 | <i>PACS2</i>    | chr14 | 0.316214074 | - T2D risk | Body    |
| cg13610262 | <i>PACS2</i>    | chr14 | 0.316214074 | - T2D risk | 5'UTR   |
| cg15463714 | <i>AGPAT3</i>   | chr21 | 0.316479139 | - T2D risk | 5'UTR   |
| cg23303782 | <i>GRK5</i>     | chr10 | 0.316512456 | + T2D risk | Body    |
| cg06196467 | <i>CUL1</i>     | chr7  | 0.316583304 | + T2D risk | 5'UTR   |
| cg05430894 | <i>ARPP19</i>   | chr15 | 0.316615271 | + T2D risk | TSS1500 |
| cg26224781 | <i>DYNC111</i>  | chr7  | 0.316643326 | - T2D risk | Body    |
| cg27354901 | <i>WWP2</i>     | chr16 | 0.316661958 | + T2D risk | Body    |
| cg02637343 | <i>WWP2</i>     | chr16 | 0.316765902 | + T2D risk | Body    |
| cg17008375 | <i>CUX1</i>     | chr7  | 0.316799757 | + T2D risk | Body    |
| cg09440989 | <i>MGRN1</i>    | chr16 | 0.316809581 | + T2D risk | Body    |
| cg02732777 | <i>NUF2</i>     | chr1  | 0.316831202 | - T2D risk | Body    |
| cg19941833 | <i>SEC31A</i>   | chr4  | 0.316912451 | + T2D risk | ExonBnd |
| cg19941833 | <i>SEC31A</i>   | chr4  | 0.316912451 | + T2D risk | Body    |
| cg04113159 | <i>ULK4</i>     | chr3  | 0.316922201 | + T2D risk | Body    |
| cg05192951 | <i>PACS2</i>    | chr14 | 0.316970726 | - T2D risk | Body    |
| cg05192951 | <i>PACS2</i>    | chr14 | 0.316970726 | - T2D risk | 5'UTR   |
| cg08957091 | <i>PDE5A</i>    | chr4  | 0.316979586 | - T2D risk | Body    |
| cg23816370 | <i>CNTNAP2</i>  | chr7  | 0.317026145 | - T2D risk | Body    |
| cg09061849 | <i>HMBX1</i>    | chr8  | 0.317049632 | + T2D risk | Body    |
| cg14032244 | <i>MAST1</i>    | chr19 | 0.317117853 | + T2D risk | Body    |
| cg27104437 | <i>GRK5</i>     | chr10 | 0.317158411 | + T2D risk | Body    |
| cg18362538 | <i>KDM4B</i>    | chr19 | 0.317323824 | + T2D risk | 5'UTR   |
| cg10565891 | <i>TANC2</i>    | chr17 | 0.317432268 | - T2D risk | Body    |
| cg27196330 | <i>DIP2C</i>    | chr10 | 0.31747846  | + T2D risk | Body    |
| cg13987304 | <i>TENM2</i>    | chr5  | 0.317568114 | + T2D risk | Body    |
| cg26647139 | <i>CADM1</i>    | chr11 | 0.317602326 | - T2D risk | TSS1500 |
| cg16708047 | <i>TENM2</i>    | chr5  | 0.317618499 | - T2D risk | Body    |
| cg14217261 | <i>SLC29A4</i>  | chr7  | 0.317644343 | + T2D risk | Body    |
| cg04569831 | <i>CNTNAP2</i>  | chr7  | 0.317682744 | - T2D risk | Body    |
| cg14736874 | <i>ARL15</i>    | chr5  | 0.317761242 | - T2D risk | Body    |
| cg16140258 | <i>ACTN4</i>    | chr19 | 0.317795824 | + T2D risk | Body    |
| cg19069029 | <i>PHACTR1</i>  | chr6  | 0.317828384 | - T2D risk | Body    |
| cg23957372 | <i>TANC2</i>    | chr17 | 0.317889541 | + T2D risk | Body    |
| cg05344046 | <i>NUP98</i>    | chr11 | 0.318015672 | + T2D risk | Body    |
| cg25750285 | <i>FLT1</i>     | chr13 | 0.318253172 | - T2D risk | Body    |
| cg19721211 | <i>SPPL2A</i>   | chr15 | 0.318327625 | + T2D risk | TSS200  |
| cg05326150 | <i>CDH22</i>    | chr20 | 0.318346512 | + T2D risk | 5'UTR   |
| cg21657450 | <i>RHOQ</i>     | chr2  | 0.318422322 | + T2D risk | TSS1500 |
| cg08241225 | <i>ATP4A</i>    | chr19 | 0.318424306 | + T2D risk | 3'UTR   |
| cg17717333 | <i>ASXL2</i>    | chr2  | 0.31845536  | + T2D risk | TSS1500 |
| cg20999118 | <i>DYNC112</i>  | chr2  | 0.318783316 | - T2D risk | TSS1500 |
| cg18439339 | <i>PRKAG2</i>   | chr7  | 0.318794531 | + T2D risk | Body    |
| cg21044834 | <i>PDK1</i>     | chr2  | 0.319051964 | - T2D risk | TSS1500 |
| cg26344933 | <i>TSC22D1</i>  | chr13 | 0.319112066 | + T2D risk | TSS1500 |
| cg26344933 | <i>TSC22D1</i>  | chr13 | 0.319112066 | + T2D risk | 5'UTR   |
| cg26344933 | <i>TSC22D1</i>  | chr13 | 0.319112066 | + T2D risk | Body    |
| cg00893603 | <i>ATP8A2</i>   | chr13 | 0.319144011 | + T2D risk | Body    |
| cg26598152 | <i>NQO1</i>     | chr16 | 0.319349019 | - T2D risk | TSS1500 |
| cg22859370 | <i>GNA12</i>    | chr7  | 0.319447461 | + T2D risk | Body    |
| cg11210138 | <i>SKAP1</i>    | chr17 | 0.319467503 | + T2D risk | Body    |
| cg19903766 | <i>ATP4A</i>    | chr19 | 0.319536735 | + T2D risk | Body    |
| cg06241427 | <i>ITPKB</i>    | chr1  | 0.319596967 | + T2D risk | Body    |
| cg23074224 | <i>APBA1</i>    | chr9  | 0.319657827 | - T2D risk | 5'UTR   |
| cg18581708 | <i>CUX1</i>     | chr7  | 0.319679071 | - T2D risk | Body    |
| cg05412882 | <i>RCAN2</i>    | chr6  | 0.319743235 | - T2D risk | TSS1500 |



|            |          |       |             |            |         |
|------------|----------|-------|-------------|------------|---------|
| cg05412882 | RCAN2    | chr6  | 0.319743235 | - T2D risk | Body    |
| cg16516248 | WWP2     | chr16 | 0.31974658  | - T2D risk | TSS1500 |
| cg16516248 | WWP2     | chr16 | 0.31974658  | - T2D risk | Body    |
| cg10658516 | TMEM131  | chr2  | 0.319797631 | - T2D risk | TSS200  |
| cg05714396 | SSBP2    | chr5  | 0.319878249 | - T2D risk | TSS1500 |
| cg03618302 | PDE3A    | chr12 | 0.319898331 | + T2D risk | Body    |
| cg07233779 | ITGB1    | chr10 | 0.319947564 | + T2D risk | TSS1500 |
| cg03010756 | CUL1     | chr7  | 0.319955319 | - T2D risk | Body    |
| cg16565696 | CDH22    | chr20 | 0.320067654 | - T2D risk | Body    |
| cg01808708 | SMG7     | chr1  | 0.320110758 | - T2D risk | 5'UTR   |
| cg01808708 | SMG7     | chr1  | 0.320110758 | - T2D risk | Body    |
| cg18578732 | ERC2     | chr3  | 0.320116998 | - T2D risk | 3'UTR   |
| cg14754494 | DDC      | chr7  | 0.32016342  | + T2D risk | Body    |
| cg02057969 | PDE5A    | chr4  | 0.320308117 | - T2D risk | Body    |
| cg24454909 | TENM2    | chr5  | 0.320321033 | - T2D risk | Body    |
| cg00074853 | AMD1     | chr6  | 0.320349699 | + T2D risk | 5'UTR   |
| cg23738353 | SLC29A4  | chr7  | 0.320551849 | - T2D risk | 5'UTR   |
| cg23738353 | SLC29A4  | chr7  | 0.320551849 | - T2D risk | 1stExon |
| cg12371681 | SNX4     | chr3  | 0.320558982 | - T2D risk | TSS200  |
| cg13780945 | RPGR     | chrX  | 0.320560235 | - T2D risk | 3'UTR   |
| cg13780945 | RPGR     | chrX  | 0.320560235 | - T2D risk | Body    |
| cg20076588 | ANK2     | chr4  | 0.320573228 | - T2D risk | Body    |
| cg09956718 | UNC80    | chr2  | 0.320613502 | - T2D risk | Body    |
| cg18310794 | NPEPPS   | chr17 | 0.320749405 | - T2D risk | Body    |
| cg22295383 | SPPL2A   | chr15 | 0.320959942 | - T2D risk | TSS200  |
| cg21548414 | CLIC5    | chr6  | 0.32099344  | + T2D risk | 5'UTR   |
| cg21548414 | CLIC5    | chr6  | 0.32099344  | + T2D risk | 1stExon |
| cg21548414 | CLIC5    | chr6  | 0.32099344  | + T2D risk | Body    |
| cg12333556 | PACS1    | chr11 | 0.321004221 | - T2D risk | Body    |
| cg19988566 | ZRANB1   | chr10 | 0.321040889 | - T2D risk | 3'UTR   |
| cg04336433 | CREBBP   | chr16 | 0.321101964 | - T2D risk | Body    |
| cg15991124 | KIAA0355 | chr19 | 0.321121634 | - T2D risk | Body    |
| cg19803298 | PHACTR1  | chr6  | 0.321136178 | - T2D risk | Body    |
| cg17409288 | LAP3     | chr4  | 0.321180439 | + T2D risk | Body    |
| cg13946678 | SPOCK1   | chr5  | 0.321305003 | - T2D risk | Body    |
| cg12318342 | ANK3     | chr10 | 0.321312791 | - T2D risk | Body    |
| cg04451043 | NDUFB3   | chr2  | 0.321351575 | + T2D risk | Body    |
| cg06485596 | PRKCB    | chr16 | 0.321458102 | + T2D risk | Body    |
| cg10333808 | ST8SIA1  | chr12 | 0.321590235 | - T2D risk | 1stExon |
| cg10333808 | ST8SIA1  | chr12 | 0.321590235 | - T2D risk | 5'UTR   |
| cg08463105 | TMEM131  | chr2  | 0.321621494 | - T2D risk | Body    |
| cg10766396 | RHBDD1   | chr2  | 0.321653179 | + T2D risk | 5'UTR   |
| cg04452569 | FLT1     | chr13 | 0.321742435 | - T2D risk | Body    |
| cg08227282 | SEZ6L    | chr22 | 0.321749122 | - T2D risk | Body    |
| cg17002851 | ATP8A2   | chr13 | 0.321838071 | + T2D risk | Body    |
| cg18313094 | USP29    | chr19 | 0.32185233  | + T2D risk | 5'UTR   |
| cg20142358 | WDR48    | chr3  | 0.321868356 | - T2D risk | Body    |
| cg27278227 | WIZ      | chr19 | 0.322087187 | + T2D risk | Body    |
| cg04146241 | CDH22    | chr20 | 0.322101547 | - T2D risk | 5'UTR   |
| cg27280256 | CLASP2   | chr3  | 0.322208828 | - T2D risk | Body    |
| cg04364718 | IMPA1    | chr8  | 0.322231589 | + T2D risk | TSS200  |
| cg14791922 | KDM4B    | chr19 | 0.322236523 | + T2D risk | Body    |
| cg02133819 | UXS1     | chr2  | 0.322570239 | + T2D risk | Body    |
| cg19935199 | TBC1D5   | chr3  | 0.322691824 | - T2D risk | 5'UTR   |
| cg25567805 | LAMA4    | chr6  | 0.322826745 | + T2D risk | Body    |
| cg13546321 | CUX2     | chr12 | 0.322888646 | - T2D risk | Body    |
| cg04696964 | PLAGL1   | chr6  | 0.323068618 | - T2D risk | 5'UTR   |
| cg17169320 | CNTROB   | chr17 | 0.323091578 | + T2D risk | ExonBnd |
| cg17169320 | CNTROB   | chr17 | 0.323091578 | + T2D risk | Body    |
| cg13589168 | DNAJC1   | chr10 | 0.323095743 | + T2D risk | Body    |
| cg13719628 | PRKCE    | chr2  | 0.323136943 | - T2D risk | TSS200  |
| cg13070185 | TMEM150C | chr4  | 0.323264879 | + T2D risk | TSS1500 |
| cg03206874 | UXS1     | chr2  | 0.323305839 | - T2D risk | Body    |
| cg20639203 | PRKACB   | chr1  | 0.323431452 | - T2D risk | Body    |
| cg20639203 | PRKACB   | chr1  | 0.323431452 | - T2D risk | TSS1500 |
| cg04478604 | PFKFB2   | chr1  | 0.3234567   | - T2D risk | Body    |
| cg04478604 | PFKFB2   | chr1  | 0.3234567   | - T2D risk | 3'UTR   |
| cg17674090 | ITGA1    | chr5  | 0.323662329 | + T2D risk | TSS1500 |
| cg11197908 | NCOA2    | chr8  | 0.323777158 | - T2D risk | Body    |
| cg22084841 | SLC30A8  | chr8  | 0.323824964 | + T2D risk | 5'UTR   |



|               |          |       |             |            |         |
|---------------|----------|-------|-------------|------------|---------|
| cg00130275    | PRMT3    | chr11 | 0.324013455 | - T2D risk | Body    |
| cg00130275    | PRMT3    | chr11 | 0.324013455 | - T2D risk | 5'UTR   |
| cg16649697    | PRMT3    | chr11 | 0.324016981 | + T2D risk | Body    |
| cg01091000    | SEMA3G   | chr3  | 0.32401735  | - T2D risk | Body    |
| cg03083542    | NUP98    | chr11 | 0.324035075 | - T2D risk | TSS1500 |
| cg03058874    | KIAA0355 | chr19 | 0.324148586 | + T2D risk | Body    |
| cg16071550    | PACS1    | chr11 | 0.324159407 | + T2D risk | Body    |
| cg24301844    | CNTROB   | chr17 | 0.324168462 | + T2D risk | TSS1500 |
| cg15908861    | ASH1L    | chr1  | 0.324254056 | - T2D risk | TSS1500 |
| cg27307648    | GALK2    | chr15 | 0.324255726 | - T2D risk | Body    |
| cg16097693    | FBXL2    | chr3  | 0.324349207 | + T2D risk | TSS1500 |
| cg12619983    | MAN1A2   | chr1  | 0.324353898 | - T2D risk | Body    |
| ch.1.3533603R | STX6     | chr1  | 0.324387231 | - T2D risk | Body    |
| cg07046194    | MTHFS    | chr15 | 0.324475616 | + T2D risk | Body    |
| cg25498137    | DDC      | chr7  | 0.324518492 | - T2D risk | Body    |
| cg20388206    | NOL4     | chr18 | 0.324531959 | + T2D risk | Body    |
| cg20388206    | NOL4     | chr18 | 0.324531959 | + T2D risk | TSS200  |
| cg24452437    | ANK2     | chr4  | 0.324536189 | + T2D risk | 5'UTR   |
| cg26309221    | RNF217   | chr6  | 0.324573044 | + T2D risk | Body    |
| cg25557396    | ANK3     | chr10 | 0.324573094 | + T2D risk | Body    |
| cg01153442    | PDE3A    | chr12 | 0.324656764 | - T2D risk | Body    |
| cg25059464    | TSC22D1  | chr13 | 0.324726163 | + T2D risk | Body    |
| cg25059464    | TSC22D1  | chr13 | 0.324726163 | + T2D risk | TSS1500 |
| cg25059464    | TSC22D1  | chr13 | 0.324726163 | + T2D risk | 5'UTR   |
| cg25059464    | TSC22D1  | chr13 | 0.324726163 | + T2D risk | 1stExon |
| cg16542170    | ANK3     | chr10 | 0.324741289 | - T2D risk | TSS1500 |
| cg24928023    | AGPAT3   | chr21 | 0.324814364 | + T2D risk | Body    |
| cg27199295    | RGS7     | chr1  | 0.324936579 | - T2D risk | Body    |
| cg10936057    | DIP2C    | chr10 | 0.325056222 | + T2D risk | Body    |
| cg20347343    | KDM4B    | chr19 | 0.325059696 | + T2D risk | Body    |
| cg05191006    | NQO1     | chr16 | 0.325278094 | - T2D risk | TSS1500 |
| cg24420432    | CUX1     | chr7  | 0.32551035  | + T2D risk | Body    |
| cg17075538    | NOTCH3   | chr19 | 0.325551111 | + T2D risk | Body    |
| cg21215416    | RSF1     | chr11 | 0.325554297 | + T2D risk | TSS1500 |
| cg19030737    | ITPKB    | chr1  | 0.325640397 | - T2D risk | TSS1500 |
| cg01587911    | RSF1     | chr11 | 0.325699261 | + T2D risk | Body    |
| cg17760455    | CCNB1    | chr5  | 0.325905451 | + T2D risk | Body    |
| cg03537184    | CLASP2   | chr3  | 0.325986047 | + T2D risk | Body    |
| cg19280901    | PKD1     | chr2  | 0.325996724 | + T2D risk | Body    |
| cg24526028    | PCYT1A   | chr3  | 0.326029804 | - T2D risk | TSS1500 |
| cg11423998    | DIP2C    | chr10 | 0.326052986 | + T2D risk | Body    |
| cg25090616    | ERC2     | chr3  | 0.326055018 | - T2D risk | 3'UTR   |
| cg21530005    | PCYT1A   | chr3  | 0.326065707 | + T2D risk | TSS1500 |
| cg21172322    | BCAT1    | chr12 | 0.326173521 | + T2D risk | Body    |
| cg17934955    | MTHFS    | chr15 | 0.326240677 | + T2D risk | Body    |
| cg24349665    | PI15     | chr8  | 0.326312781 | - T2D risk | TSS200  |
| cg13287203    | PTP4A2   | chr1  | 0.326652355 | - T2D risk | 3'UTR   |
| cg07541643    | PRKCB    | chr16 | 0.326774839 | + T2D risk | Body    |
| cg18434367    | CLIC5    | chr6  | 0.326857125 | + T2D risk | Body    |
| cg23983710    | DIP2C    | chr10 | 0.326914093 | + T2D risk | Body    |
| cg24993238    | BIRC5    | chr17 | 0.32716278  | - T2D risk | TSS1500 |
| cg05015897    | PHF21A   | chr11 | 0.327315307 | + T2D risk | Body    |
| cg08683307    | CLASP2   | chr3  | 0.327384518 | - T2D risk | Body    |
| cg08683307    | CLASP2   | chr3  | 0.327384518 | - T2D risk | TSS1500 |
| cg20706311    | DIP2C    | chr10 | 0.327403521 | + T2D risk | Body    |
| cg14242106    | SGSM2    | chr17 | 0.327534462 | - T2D risk | 3'UTR   |
| cg01230360    | KIAA1217 | chr10 | 0.327723844 | + T2D risk | TSS1500 |
| cg01230360    | KIAA1217 | chr10 | 0.327723844 | + T2D risk | 5'UTR   |
| cg01230360    | KIAA1217 | chr10 | 0.327723844 | + T2D risk | Body    |
| cg08552718    | RAP1GAP2 | chr17 | 0.327774814 | + T2D risk | Body    |
| cg14246288    | RBM4     | chr11 | 0.327800803 | + T2D risk | Body    |
| ch.2.635363R  | ASXL2    | chr2  | 0.327921153 | - T2D risk | Body    |
| cg24160569    | ANK3     | chr10 | 0.327973394 | - T2D risk | Body    |
| cg20134175    | JPH2     | chr20 | 0.32816268  | + T2D risk | Body    |
| cg02913277    | DIP2C    | chr10 | 0.328217709 | + T2D risk | Body    |
| cg17158968    | CLASP2   | chr3  | 0.328226492 | + T2D risk | Body    |
| cg20253855    | CUX1     | chr7  | 0.328339628 | + T2D risk | Body    |
| cg18775526    | CUX1     | chr7  | 0.328426712 | + T2D risk | Body    |
| cg06769602    | CUX1     | chr7  | 0.328611627 | - T2D risk | Body    |
| cg17500986    | COL4A1   | chr13 | 0.328771958 | + T2D risk | Body    |



|               |          |       |             |            |         |
|---------------|----------|-------|-------------|------------|---------|
| cg11105774    | DIP2C    | chr10 | 0.329016293 | + T2D risk | Body    |
| cg02909293    | ULK4     | chr3  | 0.329134687 | + T2D risk | Body    |
| cg08105005    | PACS2    | chr14 | 0.32917109  | + T2D risk | Body    |
| cg04415978    | IFT74    | chr9  | 0.329250558 | - T2D risk | 5'UTR   |
| cg04415978    | IFT74    | chr9  | 0.329250558 | - T2D risk | TSS200  |
| cg09908050    | TPCN1    | chr12 | 0.329399988 | - T2D risk | Body    |
| cg12126869    | DIP2C    | chr10 | 0.329448187 | + T2D risk | Body    |
| cg19997783    | GRK5     | chr10 | 0.329469803 | - T2D risk | Body    |
| cg08324703    | DIP2C    | chr10 | 0.329484395 | - T2D risk | Body    |
| cg00241281    | PACS2    | chr14 | 0.329489181 | - T2D risk | TSS1500 |
| cg09712195    | CUX1     | chr7  | 0.329599127 | + T2D risk | Body    |
| cg19069660    | SCGN     | chr6  | 0.329628434 | + T2D risk | Body    |
| cg18554639    | CLIC5    | chr6  | 0.329661159 | - T2D risk | Body    |
| cg18638433    | ATP6V1A  | chr3  | 0.329664619 | - T2D risk | Body    |
| cg14642082    | KIAA1217 | chr10 | 0.32978124  | - T2D risk | TSS200  |
| cg14642082    | KIAA1217 | chr10 | 0.32978124  | - T2D risk | Body    |
| cg20704394    | SRPK2    | chr7  | 0.329889722 | - T2D risk | Body    |
| cg26261298    | PLAGL1   | chr6  | 0.329909766 | + T2D risk | Body    |
| cg16147729    | GRK5     | chr10 | 0.329910691 | + T2D risk | Body    |
| cg14343790    | CLEC16A  | chr16 | 0.330002652 | - T2D risk | Body    |
| cg04279596    | USP53    | chr4  | 0.330247558 | - T2D risk | TSS200  |
| cg07942500    | PLEKHG3  | chr14 | 0.330342911 | + T2D risk | 5'UTR   |
| cg15745238    | ERC2     | chr3  | 0.33037916  | - T2D risk | 3'UTR   |
| cg07612821    | CDH22    | chr20 | 0.330486415 | + T2D risk | TSS1500 |
| cg00313685    | CUX1     | chr7  | 0.330486534 | + T2D risk | Body    |
| cg03443455    | GAD1     | chr2  | 0.330487804 | - T2D risk | TSS1500 |
| cg05082204    | ACTN4    | chr19 | 0.330492876 | + T2D risk | Body    |
| cg24131452    | DIP2C    | chr10 | 0.330577054 | - T2D risk | Body    |
| cg03407446    | RAP1GAP2 | chr17 | 0.330590833 | + T2D risk | Body    |
| cg16328394    | SLIT3    | chr5  | 0.330724438 | - T2D risk | Body    |
| cg12425560    | TPCN1    | chr12 | 0.33113635  | - T2D risk | Body    |
| cg24745798    | PCYT1A   | chr3  | 0.331186389 | - T2D risk | 5'UTR   |
| cg17128256    | SLC29A4  | chr7  | 0.331193123 | + T2D risk | Body    |
| cg08687330    | ARID2    | chr12 | 0.331194243 | - T2D risk | Body    |
| cg17085581    | DIP2C    | chr10 | 0.331324324 | - T2D risk | Body    |
| cg01043759    | CALD1    | chr7  | 0.331330472 | - T2D risk | Body    |
| cg21757266    | FLT1     | chr13 | 0.33141697  | + T2D risk | Body    |
| cg18895668    | ULK4     | chr3  | 0.33142855  | + T2D risk | Body    |
| ch.7.2182816F | CUX1     | chr7  | 0.331539619 | - T2D risk | Body    |
| cg05489332    | GNA12    | chr7  | 0.331583357 | - T2D risk | Body    |
| cg05489332    | GNA12    | chr7  | 0.331583357 | - T2D risk | TSS1500 |
| cg08135835    | PCYT1A   | chr3  | 0.331617934 | - T2D risk | 5'UTR   |
| cg07584494    | KDM4B    | chr19 | 0.331638516 | - T2D risk | Body    |
| cg01512138    | CLEC16A  | chr16 | 0.331734023 | - T2D risk | Body    |
| cg25387505    | NGLY1    | chr3  | 0.331745426 | - T2D risk | 1stExon |
| cg25387505    | OXSM     | chr3  | 0.331745426 | - T2D risk | TSS200  |
| cg25387505    | NGLY1    | chr3  | 0.331745426 | - T2D risk | 5'UTR   |
| cg15302705    | GNA12    | chr7  | 0.331910664 | + T2D risk | TSS1500 |
| cg11288769    | MEIS2    | chr15 | 0.33207177  | - T2D risk | Body    |
| cg25453797    | PRKCE    | chr2  | 0.332088495 | + T2D risk | Body    |
| cg19199932    | TJP1     | chr15 | 0.332132961 | + T2D risk | Body    |
| cg10484848    | SLC29A4  | chr7  | 0.332162966 | - T2D risk | TSS1500 |
| cg19924248    | ULK4     | chr3  | 0.332235019 | - T2D risk | TSS200  |
| cg21176263    | LMX1B    | chr9  | 0.332282739 | + T2D risk | Body    |
| cg05194552    | CREBBP   | chr16 | 0.332373054 | - T2D risk | Body    |
| cg23024102    | TSC22D1  | chr13 | 0.332615157 | - T2D risk | 1stExon |
| cg25485655    | KREMEN1  | chr22 | 0.332664437 | + T2D risk | Body    |
| cg15817752    | ATP6V1H  | chr8  | 0.332709372 | + T2D risk | Body    |
| cg15817752    | ATP6V1H  | chr8  | 0.332709372 | + T2D risk | ExonBnd |
| cg23259001    | PACS2    | chr14 | 0.332884285 | + T2D risk | Body    |
| cg05128566    | DYNC111  | chr7  | 0.332909625 | + T2D risk | 1stExon |
| cg05128566    | DYNC111  | chr7  | 0.332909625 | + T2D risk | 5'UTR   |
| cg02622903    | NF1      | chr17 | 0.332925637 | + T2D risk | Body    |
| cg18090068    | ERC2     | chr3  | 0.332928828 | + T2D risk | 3'UTR   |
| cg09786278    | RGS7     | chr1  | 0.333029288 | - T2D risk | Body    |
| cg00947599    | GNA12    | chr7  | 0.333045654 | - T2D risk | Body    |
| cg24789321    | ASH1L    | chr1  | 0.333173251 | - T2D risk | Body    |
| cg27566746    | DNAJC1   | chr10 | 0.333219994 | - T2D risk | Body    |
| cg02903680    | PDE8A    | chr15 | 0.333419329 | + T2D risk | Body    |
| cg16899038    | DIP2C    | chr10 | 0.333429136 | + T2D risk | Body    |



|            |          |       |             |            |         |
|------------|----------|-------|-------------|------------|---------|
| cg03745002 | TOX3     | chr16 | 0.33348908  | - T2D risk | 5'UTR   |
| cg03745002 | TOX3     | chr16 | 0.33348908  | - T2D risk | TSS1500 |
| cg26720817 | ERC2     | chr3  | 0.333579829 | - T2D risk | 3'UTR   |
| cg09317372 | NCOA7    | chr6  | 0.333588747 | + T2D risk | 5'UTR   |
| cg08448479 | ANK2     | chr4  | 0.333596978 | - T2D risk | Body    |
| cg02739534 | KIAA1217 | chr10 | 0.333654375 | - T2D risk | Body    |
| cg13806480 | ATXN1    | chr6  | 0.333700956 | - T2D risk | 5'UTR   |
| cg21338340 | ANK2     | chr4  | 0.333712881 | - T2D risk | Body    |
| cg00572058 | UNC80    | chr2  | 0.333723528 | - T2D risk | Body    |
| cg15557065 | KCNJ18   | chr17 | 0.33377599  | + T2D risk | TSS200  |
| cg15557065 | KCNJ12   | chr17 | 0.33377599  | + T2D risk | 5'UTR   |
| cg24528604 | PICALM   | chr11 | 0.333801287 | + T2D risk | Body    |
| cg21009420 | CNTNAP2  | chr7  | 0.333808604 | + T2D risk | Body    |
| cg13422751 | CDH22    | chr20 | 0.333848581 | - T2D risk | Body    |
| cg23038277 | ITPKB    | chr1  | 0.333891957 | - T2D risk | Body    |
| cg25440600 | ULK4     | chr3  | 0.333953275 | + T2D risk | Body    |
| cg18597411 | CUL1     | chr7  | 0.333995634 | - T2D risk | TSS1500 |
| cg01801350 | RNF217   | chr6  | 0.33400782  | - T2D risk | TSS1500 |
| cg02608427 | NUP98    | chr11 | 0.334096084 | + T2D risk | Body    |
| cg03876705 | TOX3     | chr16 | 0.334233716 | - T2D risk | Body    |
| cg25052122 | ANK3     | chr10 | 0.334243266 | + T2D risk | Body    |
| cg05555653 | ZHX2     | chr8  | 0.334261067 | - T2D risk | Body    |
| cg03239422 | CRYL1    | chr13 | 0.334349615 | - T2D risk | TSS1500 |
| cg17974142 | ATP6V1A  | chr3  | 0.334395615 | + T2D risk | TSS1500 |
| cg10222826 | SKAP1    | chr17 | 0.334452548 | + T2D risk | Body    |
| cg24791843 | TANC2    | chr17 | 0.334505302 | - T2D risk | Body    |
| cg20410109 | ATXN1    | chr6  | 0.334597259 | + T2D risk | 5'UTR   |
| cg01149821 | KREMEN1  | chr22 | 0.33472963  | + T2D risk | Body    |
| cg21500300 | BCAT1    | chr12 | 0.334760577 | - T2D risk | TSS1500 |
| cg13808141 | TENM2    | chr5  | 0.334818853 | + T2D risk | Body    |
| cg13334757 | DIP2C    | chr10 | 0.334865197 | - T2D risk | Body    |
| cg11591729 | CLOCK    | chr4  | 0.334873088 | - T2D risk | 5'UTR   |
| cg11591729 | CLOCK    | chr4  | 0.334873088 | - T2D risk | 1stExon |
| cg23461824 | CALD1    | chr7  | 0.334927963 | - T2D risk | Body    |
| cg24969601 | TMEM131  | chr2  | 0.334994076 | + T2D risk | Body    |
| cg09519954 | CREBBP   | chr16 | 0.335111806 | - T2D risk | Body    |
| cg17423264 | JPH2     | chr20 | 0.335271032 | - T2D risk | Body    |
| cg09491787 | ANKHD1   | chr5  | 0.335383264 | + T2D risk | Body    |
| cg26381312 | EVI5     | chr1  | 0.335406331 | + T2D risk | Body    |
| cg07512343 | LMCD1    | chr3  | 0.335446964 | - T2D risk | 5'UTR   |
| cg07512343 | LMCD1    | chr3  | 0.335446964 | - T2D risk | Body    |
| cg20877895 | ARID2    | chr12 | 0.335472522 | - T2D risk | TSS1500 |
| cg13370490 | ACTN4    | chr19 | 0.335535691 | + T2D risk | Body    |
| cg18919106 | EFR3A    | chr8  | 0.335564976 | + T2D risk | Body    |
| cg16503437 | PRKCE    | chr2  | 0.335664194 | - T2D risk | Body    |
| cg14871870 | ST8SIA1  | chr12 | 0.335786258 | + T2D risk | Body    |
| cg05960597 | CDH22    | chr20 | 0.335792478 | + T2D risk | Body    |
| cg05728853 | TMEM131  | chr2  | 0.335794966 | + T2D risk | Body    |
| cg04813590 | CADM1    | chr11 | 0.335865569 | + T2D risk | Body    |
| cg15993048 | PDE7A    | chr8  | 0.335883298 | - T2D risk | Body    |
| cg26670433 | ARPP19   | chr15 | 0.335983471 | - T2D risk | Body    |
| cg26365969 | DDC      | chr7  | 0.33608827  | - T2D risk | 5'UTR   |
| cg24172675 | PACS2    | chr14 | 0.336091045 | + T2D risk | Body    |
| cg07633212 | MTHFS    | chr15 | 0.336335232 | - T2D risk | Body    |
| cg10320070 | ZHX2     | chr8  | 0.336373345 | - T2D risk | 5'UTR   |
| cg14482153 | ATXN1    | chr6  | 0.33648878  | - T2D risk | Body    |
| cg18402315 | KIAA0232 | chr4  | 0.336552656 | - T2D risk | Body    |
| cg23353281 | TBC1D5   | chr3  | 0.336564474 | - T2D risk | 5'UTR   |
| cg23353281 | TBC1D5   | chr3  | 0.336564474 | - T2D risk | 1stExon |
| cg13773290 | CPLX2    | chr5  | 0.336597658 | - T2D risk | 5'UTR   |
| cg04471701 | LCA5     | chr6  | 0.336688491 | + T2D risk | 5'UTR   |
| cg05146205 | CUX1     | chr7  | 0.336769107 | - T2D risk | TSS1500 |
| cg23112825 | RNF157   | chr17 | 0.33678689  | + T2D risk | Body    |
| cg16074010 | PACS2    | chr14 | 0.336820572 | + T2D risk | Body    |
| cg26832509 | CHFR     | chr12 | 0.337001899 | - T2D risk | TSS1500 |
| cg17125018 | PPP1R12A | chr12 | 0.337056077 | - T2D risk | Body    |
| cg13869600 | RET      | chr10 | 0.337062262 | + T2D risk | Body    |
| cg24247040 | SKAP1    | chr17 | 0.337309356 | + T2D risk | Body    |
| cg07952985 | USP53    | chr4  | 0.337313111 | - T2D risk | 5'UTR   |
| cg07952985 | USP53    | chr4  | 0.337313111 | - T2D risk | 1stExon |



|               |           |       |             |            |         |
|---------------|-----------|-------|-------------|------------|---------|
| cg24340372    | RNF217    | chr6  | 0.33742565  | - T2D risk | Body    |
| cg20056341    | GALK2     | chr15 | 0.337602731 | + T2D risk | Body    |
| cg26303222    | CPLX2     | chr5  | 0.337691035 | + T2D risk | 5'UTR   |
| cg18430082    | RBM4      | chr11 | 0.337696831 | - T2D risk | 5'UTR   |
| cg08502322    | TENM2     | chr5  | 0.3380086   | - T2D risk | Body    |
| cg13669769    | CHFR      | chr12 | 0.338045859 | + T2D risk | Body    |
| cg19901859    | SLIT3     | chr5  | 0.338095004 | - T2D risk | Body    |
| cg15593664    | KIAA0355  | chr19 | 0.338098662 | - T2D risk | 3'UTR   |
| cg09433192    | SCAF11    | chr12 | 0.338101288 | + T2D risk | Body    |
| cg18191087    | ZHX2      | chr8  | 0.338436547 | - T2D risk | Body    |
| cg25695378    | ANK2      | chr4  | 0.338442615 | + T2D risk | Body    |
| cg00393376    | HNRNPA2B1 | chr7  | 0.338622325 | - T2D risk | Body    |
| cg11128391    | COL4A1    | chr13 | 0.338716935 | - T2D risk | Body    |
| cg19499224    | KDM4B     | chr19 | 0.338879781 | - T2D risk | Body    |
| cg12697116    | LMX1B     | chr9  | 0.338961285 | + T2D risk | Body    |
| cg17705152    | RTN4      | chr2  | 0.339043621 | + T2D risk | Body    |
| cg17029260    | ATXN1     | chr6  | 0.339129401 | + T2D risk | 5'UTR   |
| cg25314266    | SCARB2    | chr4  | 0.33918275  | + T2D risk | Body    |
| cg03204339    | TAB2      | chr6  | 0.339234892 | - T2D risk | Body    |
| cg13220896    | SRPK2     | chr7  | 0.339266853 | - T2D risk | Body    |
| cg09212577    | SPPL2A    | chr15 | 0.339456063 | + T2D risk | Body    |
| cg26472074    | BCAT1     | chr12 | 0.339604344 | - T2D risk | Body    |
| cg26472074    | BCAT1     | chr12 | 0.339604344 | - T2D risk | TSS1500 |
| cg11817192    | GNA12     | chr7  | 0.339657389 | + T2D risk | Body    |
| cg24776427    | MEIS2     | chr15 | 0.339836883 | - T2D risk | Body    |
| cg26340889    | KCNIP3    | chr2  | 0.339969928 | - T2D risk | Body    |
| cg17067577    | ANK2      | chr4  | 0.339999602 | + T2D risk | Body    |
| cg01456229    | CLASP2    | chr3  | 0.340149728 | + T2D risk | Body    |
| cg13313051    | TBC1D5    | chr3  | 0.340345171 | + T2D risk | 5'UTR   |
| cg19008133    | ADCY5     | chr3  | 0.340393709 | + T2D risk | Body    |
| cg19940563    | ATP8A2    | chr13 | 0.340417059 | + T2D risk | Body    |
| cg11471651    | SGSM2     | chr17 | 0.34044762  | - T2D risk | 5'UTR   |
| cg11471651    | SGSM2     | chr17 | 0.34044762  | - T2D risk | 1stExon |
| cg05037622    | JPH2      | chr20 | 0.340624724 | + T2D risk | TSS1500 |
| cg06833778    | RGS7      | chr1  | 0.340742154 | - T2D risk | Body    |
| cg09915396    | RAP1GAP2  | chr17 | 0.340903928 | - T2D risk | Body    |
| cg07047197    | INPP4A    | chr2  | 0.340961282 | - T2D risk | 5'UTR   |
| cg08828886    | CHFR      | chr12 | 0.340995621 | - T2D risk | Body    |
| cg27212234    | ATP4A     | chr19 | 0.341027052 | + T2D risk | Body    |
| cg05845765    | CUX1      | chr7  | 0.341395703 | + T2D risk | Body    |
| cg09423037    | TENM2     | chr5  | 0.341447569 | - T2D risk | Body    |
| cg18911778    | ANK2      | chr4  | 0.341497498 | + T2D risk | Body    |
| cg09584163    | TANC2     | chr17 | 0.341578927 | - T2D risk | Body    |
| cg21403580    | INPP4A    | chr2  | 0.341614794 | - T2D risk | ExonBnd |
| cg21403580    | INPP4A    | chr2  | 0.341614794 | - T2D risk | 5'UTR   |
| cg23143323    | ERC2      | chr3  | 0.341674041 | + T2D risk | 3'UTR   |
| cg11521114    | KIAA0355  | chr19 | 0.341827722 | + T2D risk | Body    |
| cg09753064    | JPH2      | chr20 | 0.341832592 | - T2D risk | Body    |
| cg07262659    | DIP2C     | chr10 | 0.34189264  | - T2D risk | Body    |
| cg07738413    | NGLY1     | chr3  | 0.342047382 | - T2D risk | Body    |
| cg10697473    | AGPAT3    | chr21 | 0.342076512 | - T2D risk | 3'UTR   |
| cg16710170    | PRKAG2    | chr7  | 0.342181292 | + T2D risk | Body    |
| cg17034614    | TSHZ1     | chr18 | 0.342219679 | + T2D risk | Body    |
| cg24838436    | PLEKHG3   | chr14 | 0.34224848  | - T2D risk | 5'UTR   |
| cg24671530    | TTC28     | chr22 | 0.342256211 | + T2D risk | Body    |
| cg26046284    | TENM2     | chr5  | 0.342293989 | - T2D risk | Body    |
| cg12738151    | ATP8A2    | chr13 | 0.342648879 | - T2D risk | Body    |
| cg00021166    | PPFIBP1   | chr12 | 0.342732572 | - T2D risk | TSS1500 |
| cg14312434    | AMD1      | chr6  | 0.342778911 | + T2D risk | TSS1500 |
| cg08167250    | GLG1      | chr16 | 0.342942442 | - T2D risk | Body    |
| ch.7.2185748R | CUX1      | chr7  | 0.342946641 | - T2D risk | Body    |
| cg09096476    | AMD1      | chr6  | 0.343206306 | - T2D risk | 5'UTR   |
| cg09096476    | AMD1      | chr6  | 0.343206306 | - T2D risk | Body    |
| cg18446336    | GNA12     | chr7  | 0.343226635 | - T2D risk | Body    |
| cg17221083    | SPOCK1    | chr5  | 0.343252751 | + T2D risk | Body    |
| cg09649686    | NCOA7     | chr6  | 0.343286492 | + T2D risk | 5'UTR   |
| cg00369126    | MGRN1     | chr16 | 0.343314842 | + T2D risk | TSS200  |
| cg19722656    | MAN1A1    | chr6  | 0.343402744 | + T2D risk | Body    |
| cg20580350    | ZHX2      | chr8  | 0.343431253 | + T2D risk | 5'UTR   |
| cg07951978    | CHFR      | chr12 | 0.343573167 | - T2D risk | TSS1500 |



|            |          |       |             |            |         |
|------------|----------|-------|-------------|------------|---------|
| cg05706373 | PDE8A    | chr15 | 0.343691477 | + T2D risk | Body    |
| cg10433410 | AMD1     | chr6  | 0.343705542 | - T2D risk | 5'UTR   |
| cg07412186 | ATXN1    | chr6  | 0.343825856 | + T2D risk | 5'UTR   |
| cg08803535 | POC1B    | chr12 | 0.343883042 | + T2D risk | Body    |
| cg06716922 | CREBBP   | chr16 | 0.343889731 | + T2D risk | Body    |
| cg16177259 | MAN1A1   | chr6  | 0.343911604 | - T2D risk | Body    |
| cg23151649 | PRKAG2   | chr7  | 0.343945551 | + T2D risk | Body    |
| cg22592108 | ARL15    | chr5  | 0.344174612 | - T2D risk | Body    |
| cg04865506 | NF1      | chr17 | 0.344206208 | + T2D risk | Body    |
| cg12747180 | ADCY5    | chr3  | 0.344301752 | + T2D risk | Body    |
| cg06085817 | PDE3A    | chr12 | 0.3443606   | + T2D risk | Body    |
| cg06085817 | PDE3A    | chr12 | 0.3443606   | + T2D risk | TSS1500 |
| cg03653726 | GNA12    | chr7  | 0.344476431 | + T2D risk | 3'UTR   |
| cg05285429 | ROBO2    | chr3  | 0.344566959 | - T2D risk | Body    |
| cg18603028 | SPOCK1   | chr5  | 0.344769602 | - T2D risk | 5'UTR   |
| cg06941335 | RGS7     | chr1  | 0.34484738  | - T2D risk | 5'UTR   |
| cg27158659 | PRKCE    | chr2  | 0.344874118 | - T2D risk | Body    |
| cg18654877 | ST8SIA1  | chr12 | 0.344914456 | - T2D risk | 5'UTR   |
| cg18654877 | ST8SIA1  | chr12 | 0.344914456 | - T2D risk | Body    |
| cg18389062 | MAN1A2   | chr1  | 0.344944399 | + T2D risk | TSS1500 |
| cg01727128 | RNF217   | chr6  | 0.345064546 | - T2D risk | TSS1500 |
| cg01727128 | RNF217   | chr6  | 0.345064546 | - T2D risk | Body    |
| cg11582100 | GAD1     | chr2  | 0.345260658 | - T2D risk | 1stExon |
| cg11582100 | GAD1     | chr2  | 0.345260658 | - T2D risk | 5'UTR   |
| cg26666915 | TMEM131  | chr2  | 0.345442023 | + T2D risk | Body    |
| cg09798033 | CUX2     | chr12 | 0.345447576 | - T2D risk | Body    |
| cg07582407 | SCAF11   | chr12 | 0.345534063 | - T2D risk | 5'UTR   |
| cg08310224 | PACRG    | chr6  | 0.345536812 | - T2D risk | Body    |
| cg03708234 | PRKCE    | chr2  | 0.345595466 | - T2D risk | Body    |
| cg17670650 | PTPRU    | chr1  | 0.345648939 | + T2D risk | Body    |
| cg00781957 | PRKAG2   | chr7  | 0.345666859 | + T2D risk | Body    |
| cg15433902 | PPP1R12A | chr12 | 0.345810916 | + T2D risk | TSS200  |
| cg15433902 | PPP1R12A | chr12 | 0.345810916 | + T2D risk | TSS1500 |
| cg07628084 | LAMA4    | chr6  | 0.345903139 | - T2D risk | TSS1500 |
| cg23204070 | ATP2B1   | chr12 | 0.346046093 | - T2D risk | Body    |
| cg21535772 | GAD1     | chr2  | 0.346129098 | + T2D risk | Body    |
| cg16080125 | GNA12    | chr7  | 0.34617679  | - T2D risk | Body    |
| cg01171429 | WWP2     | chr16 | 0.346215062 | + T2D risk | Body    |
| cg23054647 | ZHX2     | chr8  | 0.346394663 | - T2D risk | 5'UTR   |
| cg03232613 | PCYT1A   | chr3  | 0.346409831 | + T2D risk | Body    |
| cg16521460 | APC      | chr5  | 0.346483697 | + T2D risk | Body    |
| cg16340268 | ITPKB    | chr1  | 0.346530532 | + T2D risk | 5'UTR   |
| cg22431466 | PLAGL1   | chr6  | 0.346557322 | - T2D risk | 5'UTR   |
| cg08544585 | LAP3     | chr4  | 0.346566715 | - T2D risk | Body    |
| cg09618830 | RBBP6    | chr16 | 0.346604558 | + T2D risk | Body    |
| cg22784060 | COL4A1   | chr13 | 0.346617941 | + T2D risk | Body    |
| cg01076454 | TBC1D5   | chr3  | 0.346639217 | - T2D risk | 5'UTR   |
| cg01076454 | TBC1D5   | chr3  | 0.346639217 | - T2D risk | TSS1500 |
| cg19538119 | PDK1     | chr2  | 0.346657966 | + T2D risk | TSS1500 |
| cg19538119 | PDK1     | chr2  | 0.346657966 | + T2D risk | Body    |
| cg03358468 | KDM4B    | chr19 | 0.346660997 | + T2D risk | Body    |
| cg13903087 | ERC2     | chr3  | 0.346873056 | - T2D risk | 3'UTR   |
| cg07496388 | ANK3     | chr10 | 0.346951946 | - T2D risk | 1stExon |
| cg07496388 | ANK3     | chr10 | 0.346951946 | - T2D risk | 5'UTR   |
| cg07496388 | ANK3     | chr10 | 0.346951946 | - T2D risk | Body    |
| cg17961556 | GRK5     | chr10 | 0.346982973 | + T2D risk | Body    |
| cg13251829 | UXS1     | chr2  | 0.347015702 | - T2D risk | Body    |
| cg22104276 | GRK5     | chr10 | 0.347189935 | - T2D risk | Body    |
| cg01536712 | ZRANB1   | chr10 | 0.347262022 | - T2D risk | Body    |
| cg02193611 | KIAA1217 | chr10 | 0.347284341 | - T2D risk | TSS1500 |
| cg22399809 | PRKAG2   | chr7  | 0.347411158 | + T2D risk | Body    |
| cg11819081 | ATXN1    | chr6  | 0.347544073 | - T2D risk | 5'UTR   |
| cg02293985 | TANC2    | chr17 | 0.347554622 | - T2D risk | Body    |
| cg08082436 | RBBP6    | chr16 | 0.347639779 | + T2D risk | TSS1500 |
| cg10578110 | CUX2     | chr12 | 0.34767254  | - T2D risk | Body    |
| cg13628971 | GNA12    | chr7  | 0.347698153 | + T2D risk | TSS1500 |
| cg09414426 | LAMA4    | chr6  | 0.347716345 | - T2D risk | Body    |
| cg00398816 | RET      | chr10 | 0.347733991 | + T2D risk | Body    |
| cg08166431 | CLEC16A  | chr16 | 0.347756783 | + T2D risk | Body    |
| cg15553710 | USP53    | chr4  | 0.347769253 | + T2D risk | Body    |



|            |          |       |             |            |         |
|------------|----------|-------|-------------|------------|---------|
| cg04493488 | TOX3     | chr16 | 0.347814108 | - T2D risk | 5'UTR   |
| cg04493488 | TOX3     | chr16 | 0.347814108 | - T2D risk | Body    |
| cg18553732 | CHKA     | chr11 | 0.347864996 | + T2D risk | Body    |
| cg02606398 | ARL15    | chr5  | 0.34789964  | - T2D risk | Body    |
| cg20580912 | TTC28    | chr22 | 0.347938259 | - T2D risk | TSS1500 |
| cg11314488 | SKAP1    | chr17 | 0.347961785 | + T2D risk | Body    |
| cg11828932 | PRKD1    | chr14 | 0.347998122 | - T2D risk | Body    |
| cg00406211 | GRK5     | chr10 | 0.348366396 | - T2D risk | Body    |
| cg23359839 | LAP3     | chr4  | 0.348533466 | - T2D risk | Body    |
| cg08050550 | TMEM150C | chr4  | 0.348606551 | - T2D risk | Body    |
| cg13246235 | PHACTR1  | chr6  | 0.348649404 | - T2D risk | Body    |
| cg03608515 | RAP2A    | chr13 | 0.348771004 | - T2D risk | Body    |
| cg19079117 | ATP6V1H  | chr8  | 0.349105029 | - T2D risk | Body    |
| cg20578018 | ACTN4    | chr19 | 0.34917604  | - T2D risk | TSS1500 |
| cg26857910 | KCNJ12   | chr17 | 0.349357403 | - T2D risk | TSS200  |
| cg01578632 | WWP2     | chr16 | 0.349613567 | + T2D risk | TSS1500 |
| cg01578632 | WWP2     | chr16 | 0.349613567 | + T2D risk | Body    |
| cg09789698 | WWP2     | chr16 | 0.349695251 | + T2D risk | 5'UTR   |
| cg21797906 | PPFIBP1  | chr12 | 0.349802607 | - T2D risk | 5'UTR   |
| cg09492830 | DYNC1I2  | chr2  | 0.34980782  | - T2D risk | 5'UTR   |
| cg09492830 | DYNC1I2  | chr2  | 0.34980782  | - T2D risk | TSS200  |
| cg09492830 | DYNC1I2  | chr2  | 0.34980782  | - T2D risk | 1stExon |
| cg15750633 | ACSS2    | chr20 | 0.349897448 | - T2D risk | Body    |
| cg20055548 | CALD1    | chr7  | 0.349924851 | - T2D risk | Body    |
| cg16783764 | PACS2    | chr14 | 0.349966545 | + T2D risk | Body    |
| cg13031545 | PHACTR1  | chr6  | 0.349995369 | - T2D risk | Body    |
| cg13389684 | SSB      | chr2  | 0.350044327 | - T2D risk | TSS200  |
| cg18662080 | FLT1     | chr13 | 0.350130437 | - T2D risk | Body    |
| cg08123816 | PDE8A    | chr15 | 0.350203069 | - T2D risk | Body    |
| cg23049758 | SPAG9    | chr17 | 0.350296141 | + T2D risk | Body    |
| cg16817413 | ANK2     | chr4  | 0.350327324 | - T2D risk | Body    |
| cg26197220 | TSC22D1  | chr13 | 0.350374793 | - T2D risk | 1stExon |
| cg26197220 | TSC22D1  | chr13 | 0.350374793 | - T2D risk | 5'UTR   |
| cg05677464 | SPAG9    | chr17 | 0.350452546 | + T2D risk | Body    |
| cg17423813 | GRK5     | chr10 | 0.350453016 | + T2D risk | Body    |
| cg10636297 | AGPAT3   | chr21 | 0.350599178 | - T2D risk | 3'UTR   |
| cg16419054 | PACS2    | chr14 | 0.350648741 | + T2D risk | Body    |
| cg14387182 | NCOA7    | chr6  | 0.350658917 | - T2D risk | 5'UTR   |
| cg24322380 | GLG1     | chr16 | 0.35100479  | + T2D risk | Body    |
| cg18576674 | CLEC16A  | chr16 | 0.351051715 | + T2D risk | Body    |
| cg15978017 | FLT1     | chr13 | 0.35128593  | + T2D risk | Body    |
| cg04165359 | RANBP17  | chr5  | 0.351302003 | + T2D risk | Body    |
| cg24572153 | CRYL1    | chr13 | 0.35138662  | - T2D risk | Body    |
| cg14436051 | DIP2C    | chr10 | 0.351455586 | - T2D risk | Body    |
| cg24185852 | SLIT3    | chr5  | 0.351508194 | + T2D risk | Body    |
| cg19965221 | TJP1     | chr15 | 0.351534732 | - T2D risk | 1stExon |
| cg19965221 | TJP1     | chr15 | 0.351534732 | - T2D risk | 5'UTR   |
| cg09664186 | FBXO11   | chr2  | 0.351547844 | + T2D risk | 5'UTR   |
| cg14191360 | MET      | chr7  | 0.351558928 | + T2D risk | TSS1500 |
| cg22616646 | KDM4B    | chr19 | 0.351646991 | - T2D risk | 5'UTR   |
| cg09326497 | ERC2     | chr3  | 0.351689103 | + T2D risk | Body    |
| cg21558014 | GGPS1    | chr1  | 0.351730795 | - T2D risk | TSS200  |
| cg21558014 | GGPS1    | chr1  | 0.351730795 | - T2D risk | TSS1500 |
| cg07258928 | OXSM     | chr3  | 0.351891648 | - T2D risk | Body    |
| cg07258928 | NGLY1    | chr3  | 0.351891648 | - T2D risk | TSS1500 |
| cg07258928 | OXSM     | chr3  | 0.351891648 | - T2D risk | 5'UTR   |
| cg21229510 | ATP8A2   | chr13 | 0.352103596 | - T2D risk | Body    |
| cg06345856 | LAMA4    | chr6  | 0.352104477 | - T2D risk | Body    |
| cg07730071 | RCAN2    | chr6  | 0.352148517 | - T2D risk | Body    |
| cg08736634 | PPFIBP1  | chr12 | 0.352161793 | - T2D risk | TSS200  |
| cg23537932 | GRK5     | chr10 | 0.35220979  | + T2D risk | Body    |
| cg00332951 | DIP2C    | chr10 | 0.352326902 | - T2D risk | Body    |
| cg04447006 | SRPK2    | chr7  | 0.352403393 | + T2D risk | Body    |
| cg13549461 | CALD1    | chr7  | 0.352442174 | + T2D risk | Body    |
| cg13549461 | CALD1    | chr7  | 0.352442174 | + T2D risk | TSS1500 |
| cg03359285 | TOP2A    | chr17 | 0.352521853 | + T2D risk | Body    |
| cg20155837 | NCOR1    | chr17 | 0.352657809 | - T2D risk | Body    |
| cg22301272 | CHFR     | chr12 | 0.352670456 | + T2D risk | Body    |
| cg11051391 | SRPK2    | chr7  | 0.352807626 | + T2D risk | Body    |
| cg07061355 | SLC30A8  | chr8  | 0.352836735 | + T2D risk | TSS200  |



|            |                  |       |             |            |         |
|------------|------------------|-------|-------------|------------|---------|
| cg00830401 | <i>PRKAG2</i>    | chr7  | 0.352837808 | + T2D risk | Body    |
| cg16178141 | <i>KCNIP3</i>    | chr2  | 0.352867371 | - T2D risk | Body    |
| cg26533193 | <i>DIP2C</i>     | chr10 | 0.352868619 | - T2D risk | Body    |
| cg15244981 | <i>KDM4B</i>     | chr19 | 0.353055352 | + T2D risk | 5'UTR   |
| cg14769265 | <i>PCYT1A</i>    | chr3  | 0.35310003  | - T2D risk | 5'UTR   |
| cg19605080 | <i>LAMA4</i>     | chr6  | 0.353232405 | - T2D risk | TSS1500 |
| cg24729600 | <i>ROBO2</i>     | chr3  | 0.353268158 | - T2D risk | 5'UTR   |
| cg24729600 | <i>ROBO2</i>     | chr3  | 0.353268158 | - T2D risk | Body    |
| cg01200905 | <i>TOX3</i>      | chr16 | 0.353297552 | - T2D risk | Body    |
| cg21406217 | <i>HMBOX1</i>    | chr8  | 0.353457256 | + T2D risk | 5'UTR   |
| cg21406217 | <i>HMBOX1</i>    | chr8  | 0.353457256 | + T2D risk | 1stExon |
| cg16760019 | <i>HMBOX1</i>    | chr8  | 0.353614993 | - T2D risk | 5'UTR   |
| cg06891548 | <i>GGPS1</i>     | chr1  | 0.353655646 | - T2D risk | 5'UTR   |
| cg07186448 | <i>DNAH9</i>     | chr17 | 0.353850398 | + T2D risk | 5'UTR   |
| cg07186448 | <i>DNAH9</i>     | chr17 | 0.353850398 | + T2D risk | 1stExon |
| cg07186448 | <i>DNAH9</i>     | chr17 | 0.353850398 | + T2D risk | Body    |
| cg01668174 | <i>UXS1</i>      | chr2  | 0.353913709 | + T2D risk | 1stExon |
| cg13472882 | <i>APBA1</i>     | chr9  | 0.353959428 | - T2D risk | TSS1500 |
| cg12380513 | <i>KDM4B</i>     | chr19 | 0.353990901 | + T2D risk | Body    |
| cg18491269 | <i>ATRNL1</i>    | chr10 | 0.354071591 | + T2D risk | Body    |
| cg15351697 | <i>ULK4</i>      | chr3  | 0.354133911 | + T2D risk | Body    |
| cg09951433 | <i>CUX1</i>      | chr7  | 0.354160811 | - T2D risk | Body    |
| cg01183424 | <i>PLAGL1</i>    | chr6  | 0.354193424 | + T2D risk | 5'UTR   |
| cg05957544 | <i>AGPAT3</i>    | chr21 | 0.354212529 | - T2D risk | 5'UTR   |
| cg24345338 | <i>RCAN2</i>     | chr6  | 0.354225792 | + T2D risk | 3'UTR   |
| cg19947171 | <i>RGS7</i>      | chr1  | 0.35429884  | - T2D risk | Body    |
| cg10663557 | <i>CPLX2</i>     | chr5  | 0.354403201 | + T2D risk | 3'UTR   |
| cg19904411 | <i>TSGA10</i>    | chr2  | 0.354434515 | + T2D risk | 5'UTR   |
| cg05765921 | <i>DIP2C</i>     | chr10 | 0.354436042 | - T2D risk | Body    |
| cg22465905 | <i>UBL3</i>      | chr13 | 0.354570923 | - T2D risk | Body    |
| cg11750789 | <i>NGLY1</i>     | chr3  | 0.354742807 | + T2D risk | Body    |
| cg11750789 | <i>NGLY1</i>     | chr3  | 0.354742807 | + T2D risk | TSS200  |
| cg17566342 | <i>PACRG</i>     | chr6  | 0.354746257 | - T2D risk | Body    |
| cg23786063 | <i>ARID2</i>     | chr12 | 0.354946581 | - T2D risk | Body    |
| cg09522699 | <i>TMEM131</i>   | chr2  | 0.35494916  | + T2D risk | Body    |
| cg17494625 | <i>ASB9</i>      | chrX  | 0.355147416 | - T2D risk | 1stExon |
| cg17494625 | <i>ASB9</i>      | chrX  | 0.355147416 | - T2D risk | 5'UTR   |
| cg27015805 | <i>ATXN1</i>     | chr6  | 0.355214616 | + T2D risk | TSS1500 |
| cg18758378 | <i>SEC31A</i>    | chr4  | 0.35527443  | + T2D risk | 1stExon |
| cg18758378 | <i>SEC31A</i>    | chr4  | 0.35527443  | + T2D risk | TSS200  |
| cg18758378 | <i>SEC31A</i>    | chr4  | 0.35527443  | + T2D risk | 5'UTR   |
| cg02315870 | <i>HNRNPA2B1</i> | chr7  | 0.355591308 | - T2D risk | Body    |
| cg10308124 | <i>TMEM150C</i>  | chr4  | 0.355622734 | - T2D risk | Body    |
| cg23368787 | <i>ATP4A</i>     | chr19 | 0.355624933 | - T2D risk | Body    |
| cg17398815 | <i>COL4A1</i>    | chr13 | 0.355665628 | - T2D risk | Body    |
| cg09829457 | <i>ARL15</i>     | chr5  | 0.355674381 | + T2D risk | Body    |
| cg14142846 | <i>PACRG</i>     | chr6  | 0.355694568 | - T2D risk | Body    |
| cg08947191 | <i>KDR</i>       | chr4  | 0.355795207 | - T2D risk | Body    |
| cg01104047 | <i>SPOCK1</i>    | chr5  | 0.355872474 | - T2D risk | Body    |
| cg27093563 | <i>PHF21A</i>    | chr11 | 0.355949917 | + T2D risk | Body    |
| cg13480738 | <i>PRKCE</i>     | chr2  | 0.356038229 | - T2D risk | Body    |
| cg06369569 | <i>SLC30A8</i>   | chr8  | 0.356041698 | - T2D risk | 5'UTR   |
| cg10592619 | <i>KDM4B</i>     | chr19 | 0.356127655 | + T2D risk | Body    |
| cg05283276 | <i>KIAA1217</i>  | chr10 | 0.356167382 | + T2D risk | Body    |
| cg05809858 | <i>RANBP17</i>   | chr5  | 0.356170776 | + T2D risk | Body    |
| cg05883149 | <i>ROBO2</i>     | chr3  | 0.35622399  | + T2D risk | 5'UTR   |
| cg05883149 | <i>ROBO2</i>     | chr3  | 0.35622399  | + T2D risk | Body    |
| cg13869415 | <i>ZHX2</i>      | chr8  | 0.356226242 | + T2D risk | TSS1500 |
| cg10964302 | <i>CUX1</i>      | chr7  | 0.356233273 | - T2D risk | Body    |
| cg02521797 | <i>ST20</i>      | chr15 | 0.356307325 | + T2D risk | Body    |
| cg02521797 | <i>ST20</i>      | chr15 | 0.356307325 | + T2D risk | 5'UTR   |
| cg15282665 | <i>ST6GAL1</i>   | chr3  | 0.356389662 | - T2D risk | 5'UTR   |
| cg08467229 | <i>ATP8A2</i>    | chr13 | 0.356478686 | - T2D risk | Body    |
| cg09924579 | <i>HMBOX1</i>    | chr8  | 0.356643679 | - T2D risk | Body    |
| cg18917640 | <i>GGPS1</i>     | chr1  | 0.356703348 | - T2D risk | 5'UTR   |
| cg17537683 | <i>RTN4</i>      | chr2  | 0.35682727  | - T2D risk | Body    |
| cg21429500 | <i>LAP3</i>      | chr4  | 0.356989038 | - T2D risk | Body    |
| cg25091527 | <i>COL4A1</i>    | chr13 | 0.35701871  | - T2D risk | Body    |
| cg21185355 | <i>ULK4</i>      | chr3  | 0.357129622 | - T2D risk | Body    |
| cg23047992 | <i>CUX1</i>      | chr7  | 0.35738052  | + T2D risk | Body    |



|               |          |       |             |            |         |
|---------------|----------|-------|-------------|------------|---------|
| cg13493071    | GNA12    | chr7  | 0.357395449 | + T2D risk | Body    |
| cg16693127    | ANK3     | chr10 | 0.357422371 | - T2D risk | 1stExon |
| cg16693127    | ANK3     | chr10 | 0.357422371 | - T2D risk | 5'UTR   |
| cg10023652    | PACRG    | chr6  | 0.357456711 | - T2D risk | Body    |
| cg13804534    | SRPK2    | chr7  | 0.357500379 | + T2D risk | Body    |
| cg06335132    | SLC9A6   | chrX  | 0.357528344 | + T2D risk | Body    |
| cg00255889    | ATP8A2   | chr13 | 0.357535642 | + T2D risk | Body    |
| cg01276128    | ACTN4    | chr19 | 0.35756776  | + T2D risk | 5'UTR   |
| cg01276128    | ACTN4    | chr19 | 0.35756776  | + T2D risk | 1stExon |
| cg24628896    | APBA1    | chr9  | 0.357637481 | + T2D risk | TSS1500 |
| cg18965322    | TSGA10   | chr2  | 0.357738466 | + T2D risk | 5'UTR   |
| cg11662638    | PRKCE    | chr2  | 0.357750072 | + T2D risk | TSS200  |
| cg26471529    | HMBBOX1  | chr8  | 0.357807419 | - T2D risk | 5'UTR   |
| cg26471529    | HMBBOX1  | chr8  | 0.357807419 | - T2D risk | TSS200  |
| cg23034799    | CADM1    | chr11 | 0.357901162 | - T2D risk | TSS200  |
| cg16778018    | MGRN1    | chr16 | 0.35808071  | + T2D risk | Body    |
| cg23095451    | TMEM150C | chr4  | 0.358153807 | + T2D risk | 5'UTR   |
| cg18350895    | PRKD1    | chr14 | 0.358251046 | - T2D risk | TSS1500 |
| cg18693924    | WWP2     | chr16 | 0.358359847 | - T2D risk | Body    |
| cg03362840    | CALD1    | chr7  | 0.358432515 | + T2D risk | 1stExon |
| cg03362840    | CALD1    | chr7  | 0.358432515 | + T2D risk | 5'UTR   |
| cg16550012    | ARIH1    | chr15 | 0.358498259 | + T2D risk | TSS1500 |
| cg01921059    | MET      | chr7  | 0.358524331 | - T2D risk | 5'UTR   |
| cg06111305    | RAP2A    | chr13 | 0.358567772 | - T2D risk | 1stExon |
| cg08698854    | CALD1    | chr7  | 0.358697956 | - T2D risk | Body    |
| cg08698854    | CALD1    | chr7  | 0.358697956 | - T2D risk | TSS1500 |
| cg25011395    | CNTROB   | chr17 | 0.358734981 | + T2D risk | TSS1500 |
| cg04713352    | ATP4A    | chr19 | 0.358831194 | - T2D risk | TSS1500 |
| cg26395089    | ZRANB1   | chr10 | 0.359038869 | - T2D risk | Body    |
| cg01082884    | FNIP2    | chr4  | 0.359131088 | + T2D risk | Body    |
| cg20690400    | WWP2     | chr16 | 0.359148479 | - T2D risk | 5'UTR   |
| cg21569854    | PACS2    | chr14 | 0.359169051 | - T2D risk | Body    |
| cg02815171    | ANK2     | chr4  | 0.359333029 | - T2D risk | TSS1500 |
| cg02815171    | ANK2     | chr4  | 0.359333029 | - T2D risk | Body    |
| cg13711528    | ACTN4    | chr19 | 0.359337389 | - T2D risk | TSS200  |
| cg17412248    | CDH22    | chr20 | 0.359338237 | + T2D risk | Body    |
| cg02099572    | COL4A1   | chr13 | 0.359341186 | - T2D risk | Body    |
| cg04908608    | PRKCE    | chr2  | 0.359353692 | + T2D risk | Body    |
| cg25984364    | BCAT1    | chr12 | 0.359492797 | - T2D risk | TSS1500 |
| cg07530250    | TSC22D1  | chr13 | 0.359503465 | - T2D risk | TSS1500 |
| cg02403292    | SLIT3    | chr5  | 0.359560205 | - T2D risk | TSS200  |
| cg05351998    | TANC2    | chr17 | 0.359748006 | - T2D risk | Body    |
| cg13918948    | DIP2C    | chr10 | 0.359787037 | - T2D risk | Body    |
| cg05633973    | DIP2C    | chr10 | 0.359828395 | + T2D risk | Body    |
| cg11679177    | RGS7     | chr1  | 0.359838912 | - T2D risk | 5'UTR   |
| cg26902259    | NCOA7    | chr6  | 0.359850449 | - T2D risk | TSS200  |
| cg03769371    | LCA5     | chr6  | 0.359977301 | - T2D risk | TSS200  |
| cg10638769    | PPP1R12A | chr12 | 0.36005394  | + T2D risk | Body    |
| cg18940274    | CUL1     | chr7  | 0.360066878 | - T2D risk | Body    |
| cg08183300    | ARIH1    | chr15 | 0.360256275 | + T2D risk | Body    |
| cg13135255    | CREBBP   | chr16 | 0.360302053 | - T2D risk | Body    |
| cg03199014    | ITPKB    | chr1  | 0.36030605  | + T2D risk | Body    |
| cg03556944    | KDM4B    | chr19 | 0.36031567  | + T2D risk | Body    |
| cg06978261    | CLASP2   | chr3  | 0.360420572 | - T2D risk | Body    |
| cg08426696    | SEZ6L    | chr22 | 0.360563647 | + T2D risk | Body    |
| cg16340768    | ADCY5    | chr3  | 0.360610902 | - T2D risk | Body    |
| cg05890578    | PRKCE    | chr2  | 0.36068471  | - T2D risk | TSS1500 |
| cg22196130    | CHFR     | chr12 | 0.360736076 | + T2D risk | Body    |
| cg12480689    | PFKFB2   | chr1  | 0.360740223 | + T2D risk | Body    |
| cg21416120    | PLAGL1   | chr6  | 0.360937194 | - T2D risk | TSS1500 |
| cg21416120    | PLAGL1   | chr6  | 0.360937194 | - T2D risk | 5'UTR   |
| cg24807339    | ANK2     | chr4  | 0.360939304 | - T2D risk | Body    |
| ch.14.190588F | PRKD1    | chr14 | 0.360970404 | + T2D risk | Body    |
| cg19905251    | SLIT3    | chr5  | 0.36107245  | + T2D risk | TSS1500 |
| cg00956252    | CLEC16A  | chr16 | 0.3611091   | + T2D risk | Body    |
| cg18188807    | DDC      | chr7  | 0.361248247 | + T2D risk | Body    |
| cg08765214    | PDLIM5   | chr4  | 0.361269089 | + T2D risk | Body    |
| cg15509969    | GAD1     | chr2  | 0.361384092 | + T2D risk | 1stExon |
| cg15509969    | GAD1     | chr2  | 0.361384092 | + T2D risk | 5'UTR   |
| cg24636368    | SKAP1    | chr17 | 0.361384853 | + T2D risk | Body    |



|            |          |       |             |            |         |
|------------|----------|-------|-------------|------------|---------|
| cg14979214 | CHKA     | chr11 | 0.361415862 | - T2D risk | Body    |
| cg15965094 | RAP1GAP2 | chr17 | 0.361430843 | + T2D risk | Body    |
| cg05049639 | CUX1     | chr7  | 0.361431534 | + T2D risk | Body    |
| cg09969528 | PRKAG2   | chr7  | 0.361767781 | - T2D risk | 5'UTR   |
| cg09969528 | PRKAG2   | chr7  | 0.361767781 | - T2D risk | Body    |
| cg26498829 | POC1B    | chr12 | 0.361887043 | + T2D risk | Body    |
| cg24996339 | PHACTR1  | chr6  | 0.361917536 | - T2D risk | 3'UTR   |
| cg03487200 | RBBP6    | chr16 | 0.361959954 | - T2D risk | Body    |
| cg10675002 | ARL15    | chr5  | 0.361961087 | - T2D risk | Body    |
| cg07814335 | ARIH1    | chr15 | 0.362053165 | + T2D risk | Body    |
| cg05985663 | CREBBP   | chr16 | 0.36232399  | - T2D risk | TSS1500 |
| cg08176733 | SPOCK1   | chr5  | 0.362476436 | - T2D risk | Body    |
| cg00128482 | PI15     | chr8  | 0.362582871 | + T2D risk | 5'UTR   |
| cg11951169 | ASH1L    | chr1  | 0.362607534 | + T2D risk | Body    |
| cg15381380 | ITGA1    | chr5  | 0.362673758 | + T2D risk | Body    |
| cg22604429 | KREMEN1  | chr22 | 0.362724908 | - T2D risk | Body    |
| cg17734243 | ATXN1    | chr6  | 0.362906334 | + T2D risk | 5'UTR   |
| cg24987775 | FAM160A1 | chr4  | 0.362960097 | + T2D risk | 3'UTR   |
| cg09969827 | TJP1     | chr15 | 0.362968797 | - T2D risk | Body    |
| cg23346933 | CLIC5    | chr6  | 0.362993882 | + T2D risk | Body    |
| cg18055467 | LMX1B    | chr9  | 0.363096615 | + T2D risk | Body    |
| cg00755518 | AGPAT3   | chr21 | 0.363103863 | - T2D risk | 5'UTR   |
| cg19921237 | DIP2C    | chr10 | 0.363158036 | + T2D risk | Body    |
| cg25429902 | CNTNAP2  | chr7  | 0.363173493 | - T2D risk | Body    |
| cg23749448 | NF1      | chr17 | 0.363175055 | - T2D risk | Body    |
| cg08147187 | MGRN1    | chr16 | 0.363341536 | - T2D risk | Body    |
| cg02536793 | TENM2    | chr5  | 0.363435431 | - T2D risk | Body    |
| cg12091594 | ZHX2     | chr8  | 0.36361905  | - T2D risk | Body    |
| cg06436185 | PRKAG2   | chr7  | 0.363898379 | + T2D risk | Body    |
| cg05930631 | FBXL2    | chr3  | 0.364294989 | + T2D risk | Body    |
| cg24525684 | PRKAG2   | chr7  | 0.36435791  | - T2D risk | Body    |
| cg19053250 | UNC80    | chr2  | 0.364386825 | - T2D risk | Body    |
| cg24911397 | TANC2    | chr17 | 0.364401739 | - T2D risk | Body    |
| cg02403283 | DIP2C    | chr10 | 0.364473586 | + T2D risk | Body    |
| cg04587587 | CMTR1    | chr6  | 0.364591181 | - T2D risk | TSS1500 |
| cg01765545 | SSBP2    | chr5  | 0.364595318 | - T2D risk | Body    |
| cg09928260 | AMD1     | chr6  | 0.364883935 | + T2D risk | 5'UTR   |
| cg07884070 | RAP1B    | chr12 | 0.364903121 | + T2D risk | 5'UTR   |
| cg19972106 | BCAT1    | chr12 | 0.364935185 | - T2D risk | 3'UTR   |
| cg19550452 | AGPAT3   | chr21 | 0.364938538 | + T2D risk | 5'UTR   |
| cg19052547 | PRKAG2   | chr7  | 0.364944165 | + T2D risk | Body    |
| cg12054772 | COL4A1   | chr13 | 0.364949565 | - T2D risk | Body    |
| cg26185843 | ASH1L    | chr1  | 0.365010817 | + T2D risk | TSS1500 |
| cg00970112 | PFKFB2   | chr1  | 0.365013134 | + T2D risk | TSS200  |
| cg27069263 | RTN4     | chr2  | 0.365096377 | - T2D risk | TSS1500 |
| cg05072426 | ANK3     | chr10 | 0.365130014 | - T2D risk | Body    |
| cg21289613 | KIAA0355 | chr19 | 0.365134651 | - T2D risk | 5'UTR   |
| cg15082648 | CHID1    | chr11 | 0.365299474 | - T2D risk | Body    |
| cg17344149 | NUP98    | chr11 | 0.365416622 | - T2D risk | 5'UTR   |
| cg17493303 | RHOA     | chr3  | 0.365453579 | + T2D risk | TSS1500 |
| cg25918541 | NPAT     | chr11 | 0.365520596 | + T2D risk | Body    |
| cg04747278 | ACTN4    | chr19 | 0.365546536 | + T2D risk | Body    |
| cg17525385 | TENM2    | chr5  | 0.365608703 | + T2D risk | Body    |
| cg11169227 | APBA1    | chr9  | 0.365699911 | + T2D risk | 3'UTR   |
| cg21093704 | COL4A1   | chr13 | 0.365718802 | + T2D risk | Body    |
| cg26687497 | SLC30A8  | chr8  | 0.365808542 | - T2D risk | 5'UTR   |
| cg26687497 | SLC30A8  | chr8  | 0.365808542 | - T2D risk | 1stExon |
| cg26597734 | CLEC16A  | chr16 | 0.36602897  | + T2D risk | Body    |
| cg18669388 | SLIT3    | chr5  | 0.366134978 | - T2D risk | TSS1500 |
| cg14376625 | CUX2     | chr12 | 0.366161434 | - T2D risk | Body    |
| cg06907479 | EVI5     | chr1  | 0.366180268 | - T2D risk | Body    |
| cg19780684 | ASB9     | chrX  | 0.366191934 | + T2D risk | 1stExon |
| cg19780684 | ASB9     | chrX  | 0.366191934 | + T2D risk | 5'UTR   |
| cg09125627 | ADCY5    | chr3  | 0.366201071 | - T2D risk | Body    |
| cg24524634 | GNA12    | chr7  | 0.366267218 | - T2D risk | Body    |
| cg03274539 | RAP1GAP2 | chr17 | 0.366457267 | - T2D risk | Body    |
| cg02716173 | PDLIM5   | chr4  | 0.366593424 | - T2D risk | TSS1500 |
| cg10140536 | USP29    | chr19 | 0.366655631 | + T2D risk | TSS1500 |
| cg21039885 | GLG1     | chr16 | 0.366696996 | - T2D risk | Body    |
| cg17733649 | PRKAG2   | chr7  | 0.366762134 | - T2D risk | Body    |



|            |           |       |             |            |         |
|------------|-----------|-------|-------------|------------|---------|
| cg18477928 | CUX2      | chr12 | 0.36678725  | - T2D risk | Body    |
| cg26537431 | ATXN1     | chr6  | 0.366922364 | - T2D risk | Body    |
| cg11320208 | TENM2     | chr5  | 0.367131629 | - T2D risk | Body    |
| cg03357727 | ULK4      | chr3  | 0.367229988 | - T2D risk | Body    |
| cg01419417 | DYNC111   | chr7  | 0.367237168 | - T2D risk | Body    |
| cg06926254 | TMEM219   | chr16 | 0.367302547 | + T2D risk | TSS1500 |
| cg05789099 | TENM2     | chr5  | 0.367388793 | + T2D risk | Body    |
| cg14401309 | NOL4      | chr18 | 0.367440605 | - T2D risk | Body    |
| cg14742497 | PRKD1     | chr14 | 0.36751119  | + T2D risk | Body    |
| cg22028137 | PDE7A     | chr8  | 0.367637601 | + T2D risk | Body    |
| cg09786608 | PDE5A     | chr4  | 0.367657846 | - T2D risk | TSS200  |
| cg09786608 | PDE5A     | chr4  | 0.367657846 | - T2D risk | TSS1500 |
| cg02676906 | DIP2C     | chr10 | 0.367658487 | - T2D risk | Body    |
| cg02459537 | KCNIP3    | chr2  | 0.367800197 | - T2D risk | Body    |
| cg12900739 | RRAGB     | chrX  | 0.367802329 | + T2D risk | TSS200  |
| cg10835212 | PACS2     | chr14 | 0.368013768 | - T2D risk | 3'UTR   |
| cg17567602 | UXS1      | chr2  | 0.36809093  | + T2D risk | Body    |
| cg09737793 | CUX2      | chr12 | 0.368091919 | - T2D risk | Body    |
| cg25244253 | BCAT1     | chr12 | 0.368163368 | + T2D risk | TSS1500 |
| cg15816862 | ATXN1     | chr6  | 0.368169727 | + T2D risk | 5'UTR   |
| cg25391724 | RGS7      | chr1  | 0.368237414 | + T2D risk | Body    |
| cg25984601 | SLIT3     | chr5  | 0.368244911 | + T2D risk | Body    |
| cg05083630 | APBA1     | chr9  | 0.368327873 | - T2D risk | 5'UTR   |
| cg25093603 | SLIT3     | chr5  | 0.368425396 | + T2D risk | Body    |
| cg27665812 | KIAA1217  | chr10 | 0.36843067  | + T2D risk | Body    |
| cg14656774 | NCOA2     | chr8  | 0.368650607 | + T2D risk | 5'UTR   |
| cg06635715 | DNAJC1    | chr10 | 0.368684885 | + T2D risk | Body    |
| cg04482825 | MEIS2     | chr15 | 0.368815101 | - T2D risk | Body    |
| cg04697126 | AMD1      | chr6  | 0.368858814 | - T2D risk | 5'UTR   |
| cg12913479 | HNRNPA2B1 | chr7  | 0.368975442 | + T2D risk | TSS1500 |
| cg07957498 | DIP2C     | chr10 | 0.369092121 | + T2D risk | Body    |
| cg13783152 | SH3GL2    | chr9  | 0.369106419 | + T2D risk | 5'UTR   |
| cg13783152 | SH3GL2    | chr9  | 0.369106419 | + T2D risk | 1stExon |
| cg02899960 | GLG1      | chr16 | 0.369109228 | - T2D risk | TSS1500 |
| cg00540891 | RET       | chr10 | 0.369143393 | - T2D risk | TSS1500 |
| cg25635922 | PACS2     | chr14 | 0.36919315  | - T2D risk | Body    |
| cg13488761 | SLIT3     | chr5  | 0.369202503 | - T2D risk | Body    |
| cg03147470 | DIP2C     | chr10 | 0.369274093 | + T2D risk | Body    |
| cg08942716 | CNTROB    | chr17 | 0.369289843 | + T2D risk | TSS1500 |
| cg10718835 | CRYL1     | chr13 | 0.369304417 | + T2D risk | Body    |
| cg08325898 | NCOA2     | chr8  | 0.36958853  | + T2D risk | Body    |
| cg22775956 | CDH22     | chr20 | 0.369629101 | - T2D risk | Body    |
| cg21857146 | TTC28     | chr22 | 0.369648164 | - T2D risk | Body    |
| cg26353192 | BCAT1     | chr12 | 0.369746878 | + T2D risk | Body    |
| cg26353713 | TAB2      | chr6  | 0.369774541 | + T2D risk | Body    |
| cg03544525 | PFKFB2    | chr1  | 0.369936357 | - T2D risk | TSS200  |
| cg13454135 | ULK4      | chr3  | 0.369995636 | + T2D risk | 1stExon |
| cg13454135 | ULK4      | chr3  | 0.369995636 | + T2D risk | 5'UTR   |
| cg08701053 | PPFIBP1   | chr12 | 0.370104361 | + T2D risk | Body    |
| cg12685846 | TJP1      | chr15 | 0.370164687 | - T2D risk | TSS200  |
| cg12111714 | ATP8A2    | chr13 | 0.370205714 | - T2D risk | Body    |
| cg01507577 | CNTNAP2   | chr7  | 0.370269637 | + T2D risk | Body    |
| cg14232793 | NCOA2     | chr8  | 0.370314708 | - T2D risk | 5'UTR   |
| cg03893387 | LMX1B     | chr9  | 0.370399848 | + T2D risk | Body    |
| cg10843310 | FAM160A1  | chr4  | 0.370439402 | - T2D risk | 5'UTR   |
| cg08350738 | ARL8B     | chr3  | 0.370440053 | + T2D risk | Body    |
| cg01704198 | CLASP2    | chr3  | 0.370531874 | - T2D risk | Body    |
| cg09368905 | PRKCE     | chr2  | 0.370575627 | + T2D risk | Body    |
| cg18913798 | DLL4      | chr15 | 0.370683786 | - T2D risk | TSS1500 |
| cg16348076 | CLEC16A   | chr16 | 0.371149362 | + T2D risk | Body    |
| cg11009100 | KIAA1217  | chr10 | 0.371212285 | - T2D risk | 5'UTR   |
| cg11423517 | DDC       | chr7  | 0.371308807 | - T2D risk | Body    |
| cg22043586 | ATP2B1    | chr12 | 0.371362912 | + T2D risk | Body    |
| cg25030513 | NUCB2     | chr11 | 0.371364109 | - T2D risk | TSS1500 |
| cg19135835 | FNIP2     | chr4  | 0.371458433 | + T2D risk | Body    |
| cg10300897 | PRKCE     | chr2  | 0.371760467 | + T2D risk | Body    |
| cg00007226 | PACS2     | chr14 | 0.371788361 | + T2D risk | 1stExon |
| cg24318684 | KIAA1217  | chr10 | 0.371844664 | - T2D risk | Body    |
| cg08821669 | COX6A1    | chr12 | 0.371865677 | + T2D risk | 1stExon |
| cg04561075 | PRKCE     | chr2  | 0.371865708 | - T2D risk | Body    |



|               |          |       |             |            |         |
|---------------|----------|-------|-------------|------------|---------|
| cg13660622    | SRPK2    | chr7  | 0.371986248 | - T2D risk | Body    |
| cg02234139    | DDC      | chr7  | 0.372080815 | + T2D risk | Body    |
| cg15618517    | APC      | chr5  | 0.372155501 | - T2D risk | Body    |
| cg22300622    | SEZ6L    | chr22 | 0.372193171 | - T2D risk | Body    |
| cg17491288    | TSC22D1  | chr13 | 0.372245153 | - T2D risk | 1stExon |
| cg17491288    | TSC22D1  | chr13 | 0.372245153 | - T2D risk | 5'UTR   |
| cg19848034    | TPCN1    | chr12 | 0.372257215 | + T2D risk | Body    |
| cg13770461    | PHF21A   | chr11 | 0.372298394 | + T2D risk | Body    |
| cg24265969    | ERC2     | chr3  | 0.372323725 | - T2D risk | 3'UTR   |
| cg01552777    | DIP2C    | chr10 | 0.3723701   | + T2D risk | Body    |
| cg01245268    | RAP1GAP2 | chr17 | 0.372423581 | + T2D risk | Body    |
| cg04086239    | PRKCB    | chr16 | 0.372644502 | + T2D risk | Body    |
| cg13069535    | RBM4     | chr11 | 0.372702974 | - T2D risk | 5'UTR   |
| cg17417193    | CLIC5    | chr6  | 0.372791898 | - T2D risk | Body    |
| cg27654189    | UXS1     | chr2  | 0.372953699 | + T2D risk | TSS200  |
| cg19415587    | PTPRU    | chr1  | 0.372987651 | + T2D risk | Body    |
| cg06613222    | PRKCE    | chr2  | 0.373048637 | - T2D risk | Body    |
| cg01839603    | GNA12    | chr7  | 0.373082746 | + T2D risk | Body    |
| cg02279883    | TANC2    | chr17 | 0.373150469 | - T2D risk | TSS1500 |
| cg26920504    | CADM1    | chr11 | 0.373183201 | + T2D risk | Body    |
| cg27425700    | RHBDD1   | chr2  | 0.373212432 | - T2D risk | Body    |
| cg24978482    | POC1B    | chr12 | 0.373323421 | - T2D risk | Body    |
| cg03996348    | CLASP2   | chr3  | 0.373419324 | - T2D risk | Body    |
| cg24164005    | DDC      | chr7  | 0.3735964   | - T2D risk | TSS1500 |
| cg24164005    | DDC      | chr7  | 0.3735964   | - T2D risk | 5'UTR   |
| cg23342001    | ATRNL1   | chr10 | 0.37359979  | - T2D risk | Body    |
| cg09801828    | ACSS2    | chr20 | 0.373608358 | + T2D risk | TSS200  |
| cg21345207    | NCOA7    | chr6  | 0.373616296 | - T2D risk | Body    |
| cg23497644    | SSB      | chr2  | 0.373617482 | - T2D risk | TSS1500 |
| cg19671084    | RCAN2    | chr6  | 0.373740459 | - T2D risk | 5'UTR   |
| cg14519877    | CALD1    | chr7  | 0.373829414 | + T2D risk | Body    |
| cg11791482    | ATXN1    | chr6  | 0.373861895 | - T2D risk | 5'UTR   |
| cg10125127    | APBA1    | chr9  | 0.373875106 | - T2D risk | 5'UTR   |
| cg22699461    | CALD1    | chr7  | 0.373903787 | - T2D risk | 5'UTR   |
| cg10996014    | RHOA     | chr3  | 0.374000455 | - T2D risk | TSS1500 |
| cg10223008    | ULK4     | chr3  | 0.374154505 | + T2D risk | Body    |
| cg15880762    | GALK2    | chr15 | 0.374190146 | + T2D risk | TSS1500 |
| cg02184609    | GNA12    | chr7  | 0.374193733 | - T2D risk | Body    |
| cg24898562    | WIZ      | chr19 | 0.374350858 | + T2D risk | Body    |
| cg09284795    | MTHFS    | chr15 | 0.374371851 | + T2D risk | TSS1500 |
| ch.1.1047298R | PTP4A2   | chr1  | 0.374577955 | - T2D risk | Body    |
| cg07388580    | ATXN1    | chr6  | 0.37458568  | + T2D risk | 5'UTR   |
| cg02506578    | NGLY1    | chr3  | 0.374630406 | - T2D risk | Body    |
| cg00142834    | WWP2     | chr16 | 0.374939021 | - T2D risk | TSS1500 |
| cg03091512    | RHBDD1   | chr2  | 0.375057621 | - T2D risk | 5'UTR   |
| cg13227893    | CMTR1    | chr6  | 0.375196181 | + T2D risk | Body    |
| cg02203207    | POC1B    | chr12 | 0.375214309 | - T2D risk | Body    |
| cg20798729    | KIAA1217 | chr10 | 0.375289269 | + T2D risk | TSS1500 |
| cg20798729    | KIAA1217 | chr10 | 0.375289269 | + T2D risk | 5'UTR   |
| cg20798729    | KIAA1217 | chr10 | 0.375289269 | + T2D risk | Body    |
| cg06571559    | DIP2C    | chr10 | 0.375310126 | - T2D risk | Body    |
| cg22530055    | AGPAT3   | chr21 | 0.375326071 | + T2D risk | 5'UTR   |
| cg14201467    | CADM1    | chr11 | 0.37549496  | - T2D risk | Body    |
| cg15420926    | EFR3A    | chr8  | 0.375516845 | + T2D risk | Body    |
| cg25947141    | CUX1     | chr7  | 0.375519098 | + T2D risk | Body    |
| cg11393025    | TOP2A    | chr17 | 0.375564154 | + T2D risk | Body    |
| cg05617141    | RANBP17  | chr5  | 0.375659815 | + T2D risk | Body    |
| cg19953972    | TBC1D5   | chr3  | 0.375929357 | - T2D risk | 5'UTR   |
| cg26586242    | YWHAQ    | chr2  | 0.375945202 | + T2D risk | Body    |
| cg17658085    | PRKAG2   | chr7  | 0.376003058 | + T2D risk | Body    |
| cg16070387    | SGSM2    | chr17 | 0.3761166   | + T2D risk | Body    |
| cg22265379    | KIAA1217 | chr10 | 0.376165835 | + T2D risk | Body    |
| cg14489159    | NF1      | chr17 | 0.376199141 | - T2D risk | TSS200  |
| cg15562756    | RAP1GAP2 | chr17 | 0.376315867 | + T2D risk | Body    |
| cg13926796    | CUX1     | chr7  | 0.376334967 | + T2D risk | Body    |
| cg05318891    | PTP4A2   | chr1  | 0.376476173 | - T2D risk | 3'UTR   |
| cg09395436    | KIAA1109 | chr4  | 0.376501357 | - T2D risk | Body    |
| cg00678354    | PDE7A    | chr8  | 0.376533919 | + T2D risk | Body    |
| cg23300267    | CUX2     | chr12 | 0.3765734   | - T2D risk | 3'UTR   |
| cg16402814    | CHID1    | chr11 | 0.376635894 | + T2D risk | TSS200  |



|            |          |       |             |            |         |
|------------|----------|-------|-------------|------------|---------|
| cg23239588 | PACRG    | chr6  | 0.376733517 | - T2D risk | Body    |
| cg14025220 | ATXN1    | chr6  | 0.376783127 | - T2D risk | 5'UTR   |
| cg26280690 | MTHFS    | chr15 | 0.376875911 | - T2D risk | Body    |
| cg12404313 | DIP2C    | chr10 | 0.376975696 | + T2D risk | Body    |
| cg08933276 | GNA12    | chr7  | 0.377144401 | + T2D risk | 3'UTR   |
| cg21985745 | STX6     | chr1  | 0.377185633 | - T2D risk | Body    |
| cg18792803 | COL4A1   | chr13 | 0.377263274 | + T2D risk | Body    |
| cg26245549 | DIP2C    | chr10 | 0.377288711 | + T2D risk | Body    |
| cg02992503 | CTR9     | chr11 | 0.377291282 | + T2D risk | Body    |
| cg14887811 | ATRNL1   | chr10 | 0.377318698 | + T2D risk | 3'UTR   |
| cg24176647 | ARL15    | chr5  | 0.377366951 | + T2D risk | Body    |
| cg09618971 | TSC22D1  | chr13 | 0.377426415 | - T2D risk | 1stExon |
| cg09618971 | TSC22D1  | chr13 | 0.377426415 | - T2D risk | Body    |
| cg12911428 | NOL4     | chr18 | 0.377561613 | - T2D risk | TSS1500 |
| cg17357263 | CDH22    | chr20 | 0.377956161 | - T2D risk | Body    |
| cg18200423 | POLA1    | chrX  | 0.377966518 | - T2D risk | Body    |
| cg24754199 | DIP2C    | chr10 | 0.378111219 | - T2D risk | Body    |
| cg01040649 | ST6GAL1  | chr3  | 0.37824928  | + T2D risk | 5'UTR   |
| cg01040649 | ST6GAL1  | chr3  | 0.37824928  | + T2D risk | TSS1500 |
| cg11920745 | DIP2C    | chr10 | 0.378255554 | + T2D risk | Body    |
| cg07960932 | NPEPPS   | chr17 | 0.378376385 | + T2D risk | Body    |
| cg16021135 | ADCY5    | chr3  | 0.378489758 | + T2D risk | Body    |
| cg26075339 | PHF21A   | chr11 | 0.378643042 | + T2D risk | 5'UTR   |
| cg12470780 | ARHGEF9  | chrX  | 0.378701572 | + T2D risk | Body    |
| cg25291978 | PLAGL1   | chr6  | 0.378787913 | + T2D risk | TSS1500 |
| cg25062003 | FNIP2    | chr4  | 0.378873084 | - T2D risk | Body    |
| cg24658867 | CALD1    | chr7  | 0.378898575 | + T2D risk | Body    |
| cg01105847 | SGSM2    | chr17 | 0.378911212 | + T2D risk | Body    |
| cg24382823 | LMX1B    | chr9  | 0.379076685 | + T2D risk | Body    |
| cg01616269 | FNIP2    | chr4  | 0.379124827 | - T2D risk | Body    |
| cg03010958 | LAMA4    | chr6  | 0.379160203 | + T2D risk | Body    |
| cg27503740 | PRKD1    | chr14 | 0.37917315  | - T2D risk | Body    |
| cg02447476 | RGS7     | chr1  | 0.379204016 | - T2D risk | Body    |
| cg27321563 | SPOCK1   | chr5  | 0.379207187 | + T2D risk | Body    |
| cg09027876 | COL4A1   | chr13 | 0.37933823  | - T2D risk | Body    |
| cg13772072 | INPP4A   | chr2  | 0.379349976 | + T2D risk | 5'UTR   |
| cg07294175 | DIP2C    | chr10 | 0.379464255 | - T2D risk | Body    |
| cg08586168 | ADCY5    | chr3  | 0.379665338 | + T2D risk | TSS1500 |
| cg18263365 | SPOCK1   | chr5  | 0.37974144  | - T2D risk | 5'UTR   |
| cg26124994 | CADM1    | chr11 | 0.379779289 | + T2D risk | Body    |
| cg23004985 | PDE8A    | chr15 | 0.379804837 | - T2D risk | 3'UTR   |
| cg05739347 | GRK5     | chr10 | 0.379932144 | + T2D risk | Body    |
| cg14630659 | ST8SIA1  | chr12 | 0.380199135 | - T2D risk | Body    |
| cg09636661 | NQO1     | chr16 | 0.380261188 | + T2D risk | 3'UTR   |
| cg16937126 | DDHD2    | chr8  | 0.380262321 | - T2D risk | TSS1500 |
| cg16937126 | DDHD2    | chr8  | 0.380262321 | - T2D risk | TSS200  |
| cg23598974 | AGPAT3   | chr21 | 0.380297346 | + T2D risk | 5'UTR   |
| cg23478124 | PICALM   | chr11 | 0.380313474 | + T2D risk | Body    |
| cg17290508 | DIP2C    | chr10 | 0.380314999 | + T2D risk | Body    |
| cg08653443 | SPOCK1   | chr5  | 0.380428088 | - T2D risk | Body    |
| cg01282147 | CADM1    | chr11 | 0.380455722 | - T2D risk | Body    |
| cg13326844 | PACRG    | chr6  | 0.380474851 | - T2D risk | Body    |
| cg25838505 | RHOQ     | chr2  | 0.380580252 | + T2D risk | Body    |
| cg03669936 | FBXO11   | chr2  | 0.380618585 | - T2D risk | ExonBnd |
| cg03669936 | FBXO11   | chr2  | 0.380618585 | - T2D risk | Body    |
| cg22202031 | CHFR     | chr12 | 0.380645344 | + T2D risk | TSS1500 |
| cg10216240 | SKAP1    | chr17 | 0.380651293 | - T2D risk | Body    |
| cg18795324 | SRPK2    | chr7  | 0.380727684 | - T2D risk | Body    |
| cg12238812 | CHFR     | chr12 | 0.38104343  | + T2D risk | TSS1500 |
| cg27428660 | TMEM59   | chr1  | 0.381066229 | - T2D risk | TSS200  |
| cg26579909 | ATXN1    | chr6  | 0.381193769 | + T2D risk | 5'UTR   |
| cg22229906 | BCAT1    | chr12 | 0.381205871 | - T2D risk | Body    |
| cg19183248 | FAM160A1 | chr4  | 0.381294267 | + T2D risk | 5'UTR   |
| cg17114932 | NPAT     | chr11 | 0.381407174 | - T2D risk | Body    |
| cg02145679 | ARL15    | chr5  | 0.381415161 | + T2D risk | Body    |
| cg11266407 | CDH22    | chr20 | 0.38157141  | + T2D risk | Body    |
| cg15487558 | ATXN1    | chr6  | 0.381602248 | - T2D risk | 5'UTR   |
| cg02746620 | SLIT3    | chr5  | 0.381750257 | - T2D risk | Body    |
| cg22134476 | CHKA     | chr11 | 0.38177483  | + T2D risk | Body    |
| cg23742556 | ACTN4    | chr19 | 0.381800033 | + T2D risk | Body    |



|            |                 |       |             |            |         |
|------------|-----------------|-------|-------------|------------|---------|
| cg07093455 | <i>HMBOX1</i>   | chr8  | 0.381888073 | - T2D risk | 5'UTR   |
| cg08592305 | <i>MAST1</i>    | chr19 | 0.38190964  | + T2D risk | Body    |
| cg18005506 | <i>PICALM</i>   | chr11 | 0.381933153 | - T2D risk | TSS200  |
| cg18005506 | <i>PICALM</i>   | chr11 | 0.381933153 | - T2D risk | 5'UTR   |
| cg10209539 | <i>PPFIBP1</i>  | chr12 | 0.382046385 | - T2D risk | 5'UTR   |
| cg16930254 | <i>AGPAT3</i>   | chr21 | 0.382094091 | - T2D risk | Body    |
| cg00096603 | <i>PDLIM5</i>   | chr4  | 0.382189835 | + T2D risk | Body    |
| cg20564703 | <i>CUX1</i>     | chr7  | 0.382276505 | - T2D risk | Body    |
| cg01172766 | <i>GNA12</i>    | chr7  | 0.382330839 | - T2D risk | Body    |
| cg23958151 | <i>PACRG</i>    | chr6  | 0.382406297 | - T2D risk | Body    |
| cg15951914 | <i>SRPK2</i>    | chr7  | 0.382598028 | - T2D risk | Body    |
| cg10149159 | <i>MTHFS</i>    | chr15 | 0.382640329 | + T2D risk | TSS1500 |
| cg26967154 | <i>TSC22D1</i>  | chr13 | 0.382649769 | - T2D risk | Body    |
| cg02428746 | <i>CLASP2</i>   | chr3  | 0.382716382 | + T2D risk | Body    |
| cg15370815 | <i>NPAT</i>     | chr11 | 0.38283219  | + T2D risk | 1stExon |
| cg15370815 | <i>NPAT</i>     | chr11 | 0.38283219  | + T2D risk | 5'UTR   |
| cg17079352 | <i>NDUFB3</i>   | chr2  | 0.382965626 | - T2D risk | TSS1500 |
| cg14097129 | <i>KCNIP3</i>   | chr2  | 0.383092544 | + T2D risk | Body    |
| cg13808183 | <i>PACS2</i>    | chr14 | 0.383273514 | + T2D risk | Body    |
| cg18742521 | <i>TENM2</i>    | chr5  | 0.383364596 | + T2D risk | Body    |
| cg17220574 | <i>DIP2C</i>    | chr10 | 0.383549365 | - T2D risk | Body    |
| cg02978184 | <i>ADCY5</i>    | chr3  | 0.383608392 | + T2D risk | TSS1500 |
| cg12071317 | <i>ATP8A2</i>   | chr13 | 0.383731643 | - T2D risk | Body    |
| cg16970596 | <i>NF1</i>      | chr17 | 0.383891167 | - T2D risk | Body    |
| cg13453607 | <i>RNF157</i>   | chr17 | 0.383994578 | - T2D risk | Body    |
| cg19183542 | <i>GALK2</i>    | chr15 | 0.384061961 | - T2D risk | Body    |
| cg14955916 | <i>DIP2C</i>    | chr10 | 0.384114636 | + T2D risk | Body    |
| cg15622912 | <i>CPLX2</i>    | chr5  | 0.384118005 | + T2D risk | 5'UTR   |
| cg03431368 | <i>GALK2</i>    | chr15 | 0.384144871 | - T2D risk | Body    |
| cg15169943 | <i>NCOA2</i>    | chr8  | 0.384236574 | + T2D risk | Body    |
| cg13250884 | <i>LMCD1</i>    | chr3  | 0.38426415  | - T2D risk | TSS1500 |
| cg02020384 | <i>MDM1</i>     | chr12 | 0.384298636 | - T2D risk | Body    |
| cg12401625 | <i>ARL15</i>    | chr5  | 0.384309257 | - T2D risk | Body    |
| cg03908676 | <i>LYVE1</i>    | chr11 | 0.38461934  | - T2D risk | 5'UTR   |
| cg03908676 | <i>LYVE1</i>    | chr11 | 0.38461934  | - T2D risk | 1stExon |
| cg13673837 | <i>NOTCH3</i>   | chr19 | 0.384766603 | + T2D risk | Body    |
| cg12792732 | <i>ATP6V1H</i>  | chr8  | 0.384961296 | + T2D risk | Body    |
| cg11042589 | <i>ARL15</i>    | chr5  | 0.385030519 | - T2D risk | Body    |
| cg13585590 | <i>NCOR1</i>    | chr17 | 0.385070614 | - T2D risk | Body    |
| cg02354107 | <i>SCARB2</i>   | chr4  | 0.385070644 | - T2D risk | TSS200  |
| cg14768000 | <i>TPCN1</i>    | chr12 | 0.385075349 | + T2D risk | Body    |
| cg08524372 | <i>MGRN1</i>    | chr16 | 0.385255421 | + T2D risk | Body    |
| cg09566021 | <i>CREBBP</i>   | chr16 | 0.38529278  | + T2D risk | Body    |
| cg02735486 | <i>ANK2</i>     | chr4  | 0.385304985 | - T2D risk | 1stExon |
| cg02735486 | <i>ANK2</i>     | chr4  | 0.385304985 | - T2D risk | Body    |
| cg04728746 | <i>ATRNL1</i>   | chr10 | 0.385343306 | + T2D risk | Body    |
| cg21106962 | <i>ANK3</i>     | chr10 | 0.385483326 | - T2D risk | TSS1500 |
| cg21106962 | <i>ANK3</i>     | chr10 | 0.385483326 | - T2D risk | Body    |
| cg05485165 | <i>TMEM219</i>  | chr16 | 0.385525675 | + T2D risk | TSS1500 |
| cg04822695 | <i>PHF21A</i>   | chr11 | 0.385560674 | - T2D risk | Body    |
| cg20662476 | <i>CDK8</i>     | chr13 | 0.385920318 | - T2D risk | Body    |
| cg02773188 | <i>FAM160A1</i> | chr4  | 0.386091264 | - T2D risk | 5'UTR   |
| cg19525705 | <i>TAB2</i>     | chr6  | 0.386183811 | - T2D risk | Body    |
| cg12755397 | <i>TMEM150C</i> | chr4  | 0.386277371 | + T2D risk | TSS200  |
| cg17800974 | <i>LMCD1</i>    | chr3  | 0.386373408 | + T2D risk | 5'UTR   |
| cg17800974 | <i>LMCD1</i>    | chr3  | 0.386373408 | + T2D risk | Body    |
| cg27528351 | <i>DDC</i>      | chr7  | 0.386438838 | + T2D risk | TSS1500 |
| cg27528351 | <i>DDC</i>      | chr7  | 0.386438838 | + T2D risk | 5'UTR   |
| cg00242903 | <i>CUL1</i>     | chr7  | 0.386521022 | + T2D risk | 5'UTR   |
| cg11099918 | <i>KIAA0232</i> | chr4  | 0.386555568 | - T2D risk | Body    |
| cg15034763 | <i>TMEM59</i>   | chr1  | 0.386608235 | - T2D risk | 5'UTR   |
| cg15034763 | <i>TMEM59</i>   | chr1  | 0.386608235 | - T2D risk | 1stExon |
| cg18285813 | <i>MET</i>      | chr7  | 0.38678644  | - T2D risk | Body    |
| cg18165715 | <i>PDK1</i>     | chr2  | 0.38683305  | + T2D risk | Body    |
| cg00163294 | <i>DIP2C</i>    | chr10 | 0.386872635 | + T2D risk | Body    |
| cg14289461 | <i>LAMA4</i>    | chr6  | 0.386915451 | + T2D risk | TSS200  |
| cg01785151 | <i>ASH1L</i>    | chr1  | 0.38700045  | + T2D risk | Body    |
| cg08250135 | <i>RCAN2</i>    | chr6  | 0.387061834 | - T2D risk | Body    |
| cg26782150 | <i>DIP2C</i>    | chr10 | 0.387075835 | - T2D risk | Body    |
| cg11592503 | <i>CNTNAP2</i>  | chr7  | 0.387525217 | - T2D risk | TSS200  |



|            |          |       |             |            |         |
|------------|----------|-------|-------------|------------|---------|
| cg07201759 | ERC2     | chr3  | 0.387529064 | - T2D risk | Body    |
| cg02723395 | GAD1     | chr2  | 0.387605785 | + T2D risk | Body    |
| cg08265627 | GGPS1    | chr1  | 0.387623509 | + T2D risk | Body    |
| cg08265627 | GGPS1    | chr1  | 0.387623509 | + T2D risk | 5'UTR   |
| cg27482744 | DIP2C    | chr10 | 0.387700683 | - T2D risk | Body    |
| cg08114011 | CUX2     | chr12 | 0.387750135 | + T2D risk | Body    |
| cg00080691 | CUX1     | chr7  | 0.387822268 | - T2D risk | Body    |
| cg04053163 | SLC7A2   | chr8  | 0.387856365 | + T2D risk | 5'UTR   |
| cg04053163 | SLC7A2   | chr8  | 0.387856365 | + T2D risk | TSS1500 |
| cg16008351 | FAM160A1 | chr4  | 0.387905437 | - T2D risk | 5'UTR   |
| cg01842756 | RNF217   | chr6  | 0.387930037 | - T2D risk | Body    |
| cg04672026 | NCOA2    | chr8  | 0.388065954 | + T2D risk | 5'UTR   |
| cg14581304 | TENM2    | chr5  | 0.388069041 | - T2D risk | Body    |
| cg03190018 | PRKAG2   | chr7  | 0.388097761 | + T2D risk | Body    |
| cg17192599 | PRKAG2   | chr7  | 0.388138363 | + T2D risk | 5'UTR   |
| cg17192599 | PRKAG2   | chr7  | 0.388138363 | + T2D risk | Body    |
| cg04470564 | TBC1D5   | chr3  | 0.388182959 | - T2D risk | 5'UTR   |
| cg02988755 | COL4A1   | chr13 | 0.388294788 | + T2D risk | Body    |
| cg25749508 | ADCY5    | chr3  | 0.388428191 | + T2D risk | Body    |
| cg11970192 | ST20     | chr15 | 0.388481734 | + T2D risk | 5'UTR   |
| cg09219260 | DACH1    | chr13 | 0.388562651 | + T2D risk | Body    |
| cg25430839 | ATXN1    | chr6  | 0.388603593 | - T2D risk | 5'UTR   |
| cg07557423 | ATP8A1   | chr4  | 0.388694925 | - T2D risk | Body    |
| cg24857086 | FLT1     | chr13 | 0.388703368 | - T2D risk | Body    |
| cg14279728 | WWP2     | chr16 | 0.388731443 | - T2D risk | Body    |
| cg09943714 | DIP2C    | chr10 | 0.388733278 | + T2D risk | Body    |
| cg13800022 | ITGB1    | chr10 | 0.388744554 | - T2D risk | 5'UTR   |
| cg02676881 | PLAGL1   | chr6  | 0.388823675 | - T2D risk | 5'UTR   |
| cg20710480 | ATP8A1   | chr4  | 0.388831178 | + T2D risk | Body    |
| cg07402933 | ARHGAP32 | chr11 | 0.388945602 | + T2D risk | Body    |
| cg19194405 | DDC      | chr7  | 0.38898721  | + T2D risk | Body    |
| cg03770962 | CUL1     | chr7  | 0.389004405 | + T2D risk | Body    |
| cg15459059 | RAP1GAP2 | chr17 | 0.389058561 | - T2D risk | Body    |
| cg01958086 | MEIS2    | chr15 | 0.389077623 | - T2D risk | Body    |
| cg03336270 | ATP8A2   | chr13 | 0.389178658 | - T2D risk | Body    |
| cg07656804 | WWP2     | chr16 | 0.389192215 | + T2D risk | Body    |
| cg15537731 | PDLIM5   | chr4  | 0.389296014 | + T2D risk | 5'UTR   |
| cg15537731 | PDLIM5   | chr4  | 0.389296014 | + T2D risk | Body    |
| cg07296387 | CDH22    | chr20 | 0.389302377 | + T2D risk | Body    |
| cg05928980 | PTPRU    | chr1  | 0.389389573 | - T2D risk | Body    |
| cg23996030 | PDE7A    | chr8  | 0.389452998 | + T2D risk | TSS1500 |
| cg17564205 | ATP2B1   | chr12 | 0.389454836 | + T2D risk | Body    |
| cg11150797 | SKAP1    | chr17 | 0.389488127 | + T2D risk | Body    |
| cg08512345 | APC      | chr5  | 0.389534035 | + T2D risk | 1stExon |
| cg08512345 | APC      | chr5  | 0.389534035 | + T2D risk | 5'UTR   |
| cg01589629 | WIZ      | chr19 | 0.389570559 | + T2D risk | Body    |
| cg23393728 | CALD1    | chr7  | 0.389751991 | + T2D risk | 5'UTR   |
| cg20012761 | SLIT3    | chr5  | 0.389841558 | - T2D risk | Body    |
| cg22646782 | KDM4B    | chr19 | 0.390313044 | + T2D risk | 3'UTR   |
| cg21688692 | ATP8A1   | chr4  | 0.390337349 | - T2D risk | Body    |
| cg05998064 | DIP2C    | chr10 | 0.390449666 | + T2D risk | Body    |
| cg02100294 | SH3GL2   | chr9  | 0.390605043 | - T2D risk | Body    |
| cg01297639 | MET      | chr7  | 0.390626826 | + T2D risk | Body    |
| cg00510507 | ANK3     | chr10 | 0.390669581 | - T2D risk | 1stExon |
| cg00510507 | ANK3     | chr10 | 0.390669581 | - T2D risk | 5'UTR   |
| cg00510507 | ANK3     | chr10 | 0.390669581 | - T2D risk | Body    |
| cg07277869 | NQO1     | chr16 | 0.390847574 | - T2D risk | TSS1500 |
| cg07434277 | PACS2    | chr14 | 0.390923291 | + T2D risk | Body    |
| cg07434277 | PACS2    | chr14 | 0.390923291 | + T2D risk | 5'UTR   |
| cg26424318 | PRKCE    | chr2  | 0.391049536 | + T2D risk | Body    |
| cg05508793 | CHFR     | chr12 | 0.391064097 | - T2D risk | Body    |
| cg03171210 | ANK2     | chr4  | 0.39118474  | - T2D risk | Body    |
| cg06215509 | RPGR     | chrX  | 0.391472401 | - T2D risk | Body    |
| cg03042149 | PDE8A    | chr15 | 0.391719298 | - T2D risk | TSS1500 |
| cg25349006 | ATRN     | chr20 | 0.391776676 | + T2D risk | Body    |
| cg09905475 | KREMEN1  | chr22 | 0.392016802 | + T2D risk | Body    |
| cg26816748 | CALD1    | chr7  | 0.39207589  | - T2D risk | TSS1500 |
| cg00514964 | UNC80    | chr2  | 0.392097693 | - T2D risk | Body    |
| cg10622931 | ENAH     | chr1  | 0.392113436 | + T2D risk | Body    |
| cg17858541 | RGS7     | chr1  | 0.392147464 | - T2D risk | Body    |



|            |          |       |             |            |         |
|------------|----------|-------|-------------|------------|---------|
| cg09439192 | SLC30A8  | chr8  | 0.392205795 | - T2D risk | TSS200  |
| cg25331309 | ERC2     | chr3  | 0.392279013 | + T2D risk | Body    |
| cg12828275 | NF1      | chr17 | 0.392286132 | + T2D risk | Body    |
| cg25599673 | ST6GAL1  | chr3  | 0.392413399 | - T2D risk | 5'UTR   |
| cg25599673 | ST6GAL1  | chr3  | 0.392413399 | - T2D risk | TSS1500 |
| cg08425177 | PDE5A    | chr4  | 0.392454089 | + T2D risk | Body    |
| cg26986883 | RHOQ     | chr2  | 0.392456134 | + T2D risk | Body    |
| cg15861644 | RBBP6    | chr16 | 0.392464032 | - T2D risk | 5'UTR   |
| cg15861644 | RBBP6    | chr16 | 0.392464032 | - T2D risk | 1stExon |
| cg04998702 | MEIS2    | chr15 | 0.392468083 | + T2D risk | TSS1500 |
| cg04998702 | MEIS2    | chr15 | 0.392468083 | + T2D risk | 5'UTR   |
| cg04998702 | MEIS2    | chr15 | 0.392468083 | + T2D risk | Body    |
| cg04998702 | MEIS2    | chr15 | 0.392468083 | + T2D risk | ExonBnd |
| cg04998702 | MEIS2    | chr15 | 0.392468083 | + T2D risk | TSS200  |
| cg04998702 | MEIS2    | chr15 | 0.392468083 | + T2D risk | 1stExon |
| cg17974145 | CUX1     | chr7  | 0.392632439 | - T2D risk | Body    |
| cg12365648 | PDLIM5   | chr4  | 0.392746417 | + T2D risk | 5'UTR   |
| cg12365648 | PDLIM5   | chr4  | 0.392746417 | + T2D risk | Body    |
| cg16031179 | RNF217   | chr6  | 0.392800271 | + T2D risk | Body    |
| cg12571892 | PDE5A    | chr4  | 0.392912115 | - T2D risk | TSS1500 |
| cg17515702 | BIRC5    | chr17 | 0.393031489 | + T2D risk | Body    |
| cg02917381 | MEIS2    | chr15 | 0.393039769 | - T2D risk | 5'UTR   |
| cg02917381 | MEIS2    | chr15 | 0.393039769 | - T2D risk | 1stExon |
| cg02917381 | MEIS2    | chr15 | 0.393039769 | - T2D risk | TSS1500 |
| cg01836011 | RGS7     | chr1  | 0.393203558 | + T2D risk | Body    |
| cg11253913 | CALD1    | chr7  | 0.39345843  | - T2D risk | Body    |
| cg20961366 | KCNJ12   | chr17 | 0.393522557 | + T2D risk | 5'UTR   |
| cg03120823 | ATP8A2   | chr13 | 0.393581693 | + T2D risk | Body    |
| cg15937325 | PTPRU    | chr1  | 0.393735134 | + T2D risk | Body    |
| cg04147428 | MET      | chr7  | 0.393826136 | - T2D risk | 5'UTR   |
| cg11348701 | GAD1     | chr2  | 0.393859544 | + T2D risk | Body    |
| cg01802593 | ST8SIA1  | chr12 | 0.393965146 | - T2D risk | 3'UTR   |
| cg23353113 | WWP2     | chr16 | 0.394013143 | - T2D risk | Body    |
| cg14203426 | CUX1     | chr7  | 0.394058088 | - T2D risk | Body    |
| cg07574645 | FLT1     | chr13 | 0.394242991 | - T2D risk | Body    |
| cg12870332 | ZRANB1   | chr10 | 0.394283411 | + T2D risk | Body    |
| cg23720519 | KIAA1217 | chr10 | 0.394399825 | - T2D risk | Body    |
| cg11881861 | SGSM2    | chr17 | 0.394467942 | - T2D risk | Body    |
| cg09965980 | FLT1     | chr13 | 0.394570775 | + T2D risk | 3'UTR   |
| cg06251068 | CHID1    | chr11 | 0.394595293 | + T2D risk | 5'UTR   |
| cg06251068 | CHID1    | chr11 | 0.394595293 | + T2D risk | TSS200  |
| cg09787394 | TSGA10   | chr2  | 0.394637746 | - T2D risk | TSS200  |
| cg17304695 | ST6GAL1  | chr3  | 0.394720291 | + T2D risk | 5'UTR   |
| cg05782454 | MGRN1    | chr16 | 0.394755654 | + T2D risk | Body    |
| cg18450582 | DYNC111  | chr7  | 0.394767732 | - T2D risk | Body    |
| cg14804129 | KDM4B    | chr19 | 0.394816166 | + T2D risk | Body    |
| cg02170577 | SRPK2    | chr7  | 0.394868741 | - T2D risk | Body    |
| cg12263857 | RNF217   | chr6  | 0.395059195 | - T2D risk | Body    |
| cg22509138 | CDH22    | chr20 | 0.395176165 | - T2D risk | Body    |
| cg09254099 | ITPKB    | chr1  | 0.395253024 | + T2D risk | Body    |
| cg07562451 | TANC2    | chr17 | 0.3953195   | + T2D risk | Body    |
| cg07611606 | MTHFS    | chr15 | 0.395396822 | - T2D risk | 5'UTR   |
| cg07611606 | MTHFS    | chr15 | 0.395396822 | - T2D risk | TSS200  |
| cg24583704 | CRYL1    | chr13 | 0.395423927 | - T2D risk | Body    |
| cg27015761 | ATP8A1   | chr4  | 0.395431324 | - T2D risk | TSS200  |
| cg18441041 | CUX1     | chr7  | 0.395561805 | + T2D risk | Body    |
| cg07423421 | PACS2    | chr14 | 0.395586493 | - T2D risk | Body    |
| cg07423421 | PACS2    | chr14 | 0.395586493 | - T2D risk | 5'UTR   |
| cg26030025 | TMEM59   | chr1  | 0.395603038 | + T2D risk | 5'UTR   |
| cg26030025 | TMEM59   | chr1  | 0.395603038 | + T2D risk | Body    |
| cg10065839 | AGPAT3   | chr21 | 0.395644679 | - T2D risk | Body    |
| cg07214539 | WWP2     | chr16 | 0.395650435 | + T2D risk | ExonBnd |
| cg07214539 | WWP2     | chr16 | 0.395650435 | + T2D risk | Body    |
| cg17880118 | COL4A1   | chr13 | 0.395667534 | + T2D risk | Body    |
| cg19669126 | DNAH9    | chr17 | 0.39568313  | - T2D risk | 5'UTR   |
| cg19669126 | DNAH9    | chr17 | 0.39568313  | - T2D risk | Body    |
| cg22866659 | CUX1     | chr7  | 0.395841603 | + T2D risk | Body    |
| cg01433654 | ARL15    | chr5  | 0.395854168 | + T2D risk | Body    |
| cg25820234 | KDM4B    | chr19 | 0.395863556 | + T2D risk | 5'UTR   |
| cg02661079 | CDH22    | chr20 | 0.395956795 | - T2D risk | Body    |



|            |          |       |             |            |         |
|------------|----------|-------|-------------|------------|---------|
| cg17445453 | CHFR     | chr12 | 0.3959568   | + T2D risk | Body    |
| cg14657915 | DNAH9    | chr17 | 0.396016044 | - T2D risk | Body    |
| cg03736327 | RET      | chr10 | 0.396021808 | - T2D risk | Body    |
| cg24891222 | CUX1     | chr7  | 0.396033937 | + T2D risk | Body    |
| cg15314149 | NPAT     | chr11 | 0.396323689 | + T2D risk | Body    |
| cg13159168 | PACS1    | chr11 | 0.396353274 | - T2D risk | Body    |
| cg26526047 | KIAA1217 | chr10 | 0.396372849 | - T2D risk | 5'UTR   |
| cg10844679 | TMEM131  | chr2  | 0.396597037 | - T2D risk | Body    |
| cg00692161 | ANKHD1   | chr5  | 0.396727156 | + T2D risk | Body    |
| cg25682171 | COL4A1   | chr13 | 0.396733843 | - T2D risk | Body    |
| cg13309884 | CADM1    | chr11 | 0.396750983 | - T2D risk | Body    |
| cg10947480 | HMBX1    | chr8  | 0.39676584  | - T2D risk | 5'UTR   |
| cg23524037 | SLIT3    | chr5  | 0.396810866 | - T2D risk | Body    |
| cg00729049 | GAD1     | chr2  | 0.396893357 | + T2D risk | Body    |
| cg25026700 | FNIP2    | chr4  | 0.396971675 | + T2D risk | Body    |
| cg04944477 | SCAF8    | chr6  | 0.397163126 | - T2D risk | Body    |
| cg14222879 | NCOA2    | chr8  | 0.397288917 | - T2D risk | TSS1500 |
| cg07382273 | PTP4A2   | chr1  | 0.397314776 | - T2D risk | 5'UTR   |
| cg07382273 | PTP4A2   | chr1  | 0.397314776 | - T2D risk | 1stExon |
| cg24125889 | MDM1     | chr12 | 0.397359216 | + T2D risk | 5'UTR   |
| cg24125889 | MDM1     | chr12 | 0.397359216 | + T2D risk | 1stExon |
| cg23655704 | SGSM2    | chr17 | 0.397524306 | + T2D risk | Body    |
| cg01327877 | GRK5     | chr10 | 0.397599132 | - T2D risk | TSS1500 |
| cg06234781 | CREBBP   | chr16 | 0.397607423 | + T2D risk | Body    |
| cg05682965 | NOTCH3   | chr19 | 0.3976239   | - T2D risk | Body    |
| cg05361257 | KIAA1217 | chr10 | 0.397708638 | + T2D risk | 5'UTR   |
| cg00028455 | NCOA7    | chr6  | 0.397711533 | + T2D risk | 5'UTR   |
| cg22998640 | PICALM   | chr11 | 0.397761558 | + T2D risk | 5'UTR   |
| cg22998640 | PICALM   | chr11 | 0.397761558 | + T2D risk | Body    |
| cg14648190 | DIP2C    | chr10 | 0.39776623  | + T2D risk | Body    |
| cg09620929 | PRKAG2   | chr7  | 0.3978039   | + T2D risk | 5'UTR   |
| cg09620929 | PRKAG2   | chr7  | 0.3978039   | + T2D risk | Body    |
| cg22908922 | PACS2    | chr14 | 0.397940589 | + T2D risk | Body    |
| cg14825889 | RANBP17  | chr5  | 0.398154661 | + T2D risk | Body    |
| cg14161241 | PLAGL1   | chr6  | 0.398161408 | + T2D risk | TSS1500 |
| cg14161241 | PLAGL1   | chr6  | 0.398161408 | + T2D risk | 5'UTR   |
| cg05674052 | CUX1     | chr7  | 0.39824486  | + T2D risk | Body    |
| cg24063615 | LAMA4    | chr6  | 0.398271744 | - T2D risk | Body    |
| cg14587045 | NPAT     | chr11 | 0.39829586  | - T2D risk | Body    |
| cg26535072 | APBA1    | chr9  | 0.398355933 | - T2D risk | TSS1500 |
| cg21484573 | PACRG    | chr6  | 0.398404795 | - T2D risk | Body    |
| cg10729739 | CNTROB   | chr17 | 0.398409557 | + T2D risk | TSS200  |
| cg27608614 | ZHX2     | chr8  | 0.398432992 | + T2D risk | 5'UTR   |
| cg06811300 | ATXN1    | chr6  | 0.398667322 | - T2D risk | 5'UTR   |
| cg24433685 | DNAJC13  | chr3  | 0.399302636 | + T2D risk | 5'UTR   |
| cg17600785 | ERC2     | chr3  | 0.399408603 | + T2D risk | Body    |
| cg25912911 | PDE3A    | chr12 | 0.399492272 | + T2D risk | 1stExon |
| cg05945869 | PDLIM5   | chr4  | 0.399557972 | - T2D risk | Body    |
| cg07768002 | PCYT1A   | chr3  | 0.399593909 | - T2D risk | Body    |
| cg17735169 | RAP1GAP2 | chr17 | 0.399653535 | - T2D risk | Body    |
| cg13877163 | PRKAG2   | chr7  | 0.39971038  | + T2D risk | Body    |
| cg27232130 | PACRG    | chr6  | 0.399717777 | + T2D risk | Body    |
| cg21620535 | NUCB2    | chr11 | 0.39974979  | - T2D risk | TSS1500 |
| cg22631387 | SLIT3    | chr5  | 0.399819942 | + T2D risk | Body    |
| cg22984723 | KREMEN1  | chr22 | 0.399963688 | - T2D risk | Body    |
| cg09887007 | FLT1     | chr13 | 0.400033021 | - T2D risk | TSS1500 |
| cg07570641 | RANBP17  | chr5  | 0.400181633 | - T2D risk | TSS1500 |
| cg03418237 | DIP2C    | chr10 | 0.400262652 | + T2D risk | Body    |
| cg00530538 | SEZ6L    | chr22 | 0.400275701 | - T2D risk | Body    |
| cg25967324 | ADCY5    | chr3  | 0.40033776  | + T2D risk | Body    |
| cg24250393 | PRKCB    | chr16 | 0.40034744  | - T2D risk | TSS1500 |
| cg24987733 | USP53    | chr4  | 0.400354996 | + T2D risk | 5'UTR   |
| cg02498334 | KCNIP3   | chr2  | 0.400445594 | + T2D risk | TSS1500 |
| cg08646713 | PRKD1    | chr14 | 0.400585328 | - T2D risk | Body    |
| cg11268628 | EFR3A    | chr8  | 0.400679108 | + T2D risk | TSS1500 |
| cg17353823 | ST6GAL1  | chr3  | 0.400727509 | - T2D risk | 5'UTR   |
| cg06104764 | SCARB2   | chr4  | 0.400754468 | + T2D risk | Body    |
| cg06717140 | MGRN1    | chr16 | 0.400948354 | + T2D risk | Body    |
| cg04454957 | SCAF11   | chr12 | 0.400958573 | + T2D risk | Body    |
| cg06319033 | FBXL2    | chr3  | 0.401006298 | - T2D risk | TSS200  |



|            |          |       |             |            |         |
|------------|----------|-------|-------------|------------|---------|
| cg22574559 | NCOR1    | chr17 | 0.401034638 | + T2D risk | Body    |
| cg15753746 | GAD1     | chr2  | 0.401259623 | - T2D risk | Body    |
| cg09704544 | PDE8A    | chr15 | 0.40129027  | + T2D risk | Body    |
| cg08592897 | RHOA     | chr3  | 0.401348766 | - T2D risk | 3'UTR   |
| cg07834314 | GNA12    | chr7  | 0.401427796 | - T2D risk | Body    |
| cg26942930 | CNTNAP2  | chr7  | 0.401464462 | - T2D risk | Body    |
| cg19800916 | GRK5     | chr10 | 0.401545132 | + T2D risk | Body    |
| cg24935345 | ITGA1    | chr5  | 0.401604041 | - T2D risk | Body    |
| cg21930781 | CUX1     | chr7  | 0.401678103 | + T2D risk | Body    |
| cg08530205 | CUX1     | chr7  | 0.401819955 | - T2D risk | Body    |
| cg04770900 | CUX2     | chr12 | 0.401842074 | + T2D risk | Body    |
| cg14248235 | ASXL2    | chr2  | 0.401857424 | - T2D risk | Body    |
| cg11659747 | SCARB2   | chr4  | 0.401877159 | - T2D risk | 1stExon |
| cg19949018 | SGSM2    | chr17 | 0.40206047  | - T2D risk | Body    |
| cg23338468 | EFCAB14  | chr1  | 0.402100828 | + T2D risk | TSS1500 |
| cg11419723 | SLC9A6   | chrX  | 0.402193948 | + T2D risk | 3'UTR   |
| cg22866675 | ATRNL1   | chr10 | 0.402237134 | - T2D risk | 1stExon |
| cg22866675 | ATRNL1   | chr10 | 0.402237134 | - T2D risk | Body    |
| cg22866675 | ATRNL1   | chr10 | 0.402237134 | - T2D risk | 5'UTR   |
| cg12258607 | PHACTR1  | chr6  | 0.402294866 | - T2D risk | TSS1500 |
| cg00557536 | ERC2     | chr3  | 0.402309514 | - T2D risk | Body    |
| cg23656890 | BCAT1    | chr12 | 0.402335589 | - T2D risk | Body    |
| cg16943030 | TENM2    | chr5  | 0.402338689 | + T2D risk | Body    |
| cg00050792 | COL4A1   | chr13 | 0.402450152 | + T2D risk | Body    |
| cg03513850 | CUX2     | chr12 | 0.402550986 | - T2D risk | Body    |
| cg24682750 | TAB2     | chr6  | 0.402566569 | - T2D risk | Body    |
| cg00647317 | DDC      | chr7  | 0.402648353 | + T2D risk | TSS1500 |
| cg04248036 | FLT1     | chr13 | 0.40272308  | + T2D risk | Body    |
| cg11258489 | STX6     | chr1  | 0.402879282 | + T2D risk | 3'UTR   |
| cg08708069 | IFT74    | chr9  | 0.402884022 | - T2D risk | 5'UTR   |
| cg08708069 | IFT74    | chr9  | 0.402884022 | - T2D risk | TSS1500 |
| cg04874031 | CALD1    | chr7  | 0.402989705 | + T2D risk | 1stExon |
| cg04874031 | CALD1    | chr7  | 0.402989705 | + T2D risk | 5'UTR   |
| cg17487957 | NF1      | chr17 | 0.403037722 | - T2D risk | Body    |
| cg21287367 | ENAH     | chr1  | 0.403241532 | + T2D risk | Body    |
| cg01934420 | AGPAT3   | chr21 | 0.403265588 | + T2D risk | 5'UTR   |
| cg20421928 | SLIT3    | chr5  | 0.403379664 | - T2D risk | Body    |
| cg20914464 | NOL4     | chr18 | 0.403399861 | - T2D risk | TSS1500 |
| cg17257720 | ZDHHC2   | chr8  | 0.403469153 | + T2D risk | Body    |
| cg17312424 | PDLIM5   | chr4  | 0.403528954 | + T2D risk | 5'UTR   |
| cg17312424 | PDLIM5   | chr4  | 0.403528954 | + T2D risk | Body    |
| cg11615758 | PHACTR1  | chr6  | 0.403661369 | + T2D risk | Body    |
| cg24117849 | SPPL2A   | chr15 | 0.403693774 | + T2D risk | Body    |
| cg02515738 | CNTNAP2  | chr7  | 0.403703523 | - T2D risk | Body    |
| cg11918372 | FBXO11   | chr2  | 0.404018888 | + T2D risk | 5'UTR   |
| cg11918372 | FBXO11   | chr2  | 0.404018888 | + T2D risk | 1stExon |
| cg20645309 | ANK3     | chr10 | 0.404035583 | - T2D risk | Body    |
| cg06437195 | PHACTR1  | chr6  | 0.40409745  | + T2D risk | Body    |
| cg25426307 | DIP2C    | chr10 | 0.404142609 | + T2D risk | Body    |
| cg08172674 | POLA1    | chrX  | 0.404148444 | - T2D risk | Body    |
| cg12835599 | PRKAG2   | chr7  | 0.404156287 | - T2D risk | Body    |
| cg11521414 | ANKHD1   | chr5  | 0.40426024  | + T2D risk | Body    |
| cg17493526 | PDE3A    | chr12 | 0.404274662 | + T2D risk | Body    |
| cg00196119 | SEMA3G   | chr3  | 0.404625907 | - T2D risk | TSS1500 |
| cg25715964 | CUX1     | chr7  | 0.404630318 | - T2D risk | Body    |
| cg20966551 | MAST1    | chr19 | 0.404644221 | - T2D risk | TSS200  |
| cg23240589 | RTN4     | chr2  | 0.404776938 | - T2D risk | Body    |
| cg08434803 | PHF21A   | chr11 | 0.404983381 | + T2D risk | 5'UTR   |
| cg08434803 | PHF21A   | chr11 | 0.404983381 | + T2D risk | ExonBnd |
| cg24066423 | PRMT3    | chr11 | 0.405004448 | + T2D risk | Body    |
| cg20952652 | UXS1     | chr2  | 0.405035101 | + T2D risk | Body    |
| cg00757212 | ST8SIA1  | chr12 | 0.405054117 | - T2D risk | TSS1500 |
| cg10903225 | PRKCE    | chr2  | 0.40506647  | + T2D risk | Body    |
| cg08822898 | MDM1     | chr12 | 0.405267563 | - T2D risk | Body    |
| cg14355247 | PACRG    | chr6  | 0.405332255 | + T2D risk | Body    |
| cg20802511 | CUX1     | chr7  | 0.405381598 | - T2D risk | Body    |
| cg22555517 | RAP1GAP2 | chr17 | 0.405410357 | - T2D risk | Body    |
| cg12788227 | RNF217   | chr6  | 0.405437751 | - T2D risk | TSS1500 |
| cg16355244 | RNF157   | chr17 | 0.405510488 | - T2D risk | Body    |
| cg09719626 | PHF21A   | chr11 | 0.405529522 | + T2D risk | Body    |



|            |          |       |             |            |         |
|------------|----------|-------|-------------|------------|---------|
| cg07878191 | CALD1    | chr7  | 0.405910129 | - T2D risk | Body    |
| cg17968880 | GGPS1    | chr1  | 0.405980198 | - T2D risk | Body    |
| cg22547978 | ERC2     | chr3  | 0.40605195  | + T2D risk | 3'UTR   |
| cg21713424 | DDC      | chr7  | 0.406065223 | + T2D risk | Body    |
| cg02989351 | YWHAQ    | chr2  | 0.406165966 | + T2D risk | 5'UTR   |
| cg11943389 | DNAJC13  | chr3  | 0.406193409 | + T2D risk | Body    |
| cg13529668 | PHF21A   | chr11 | 0.406304992 | - T2D risk | Body    |
| cg04797180 | TENM2    | chr5  | 0.406325038 | + T2D risk | Body    |
| cg11057897 | APC      | chr5  | 0.406335951 | - T2D risk | TSS1500 |
| cg00428487 | SLC29A4  | chr7  | 0.406351768 | + T2D risk | 5'UTR   |
| cg04072177 | GNA12    | chr7  | 0.406392383 | - T2D risk | Body    |
| cg07983394 | DIP2C    | chr10 | 0.406414992 | + T2D risk | Body    |
| cg04042828 | FAM160A1 | chr4  | 0.40643825  | + T2D risk | TSS1500 |
| cg02976864 | GAD1     | chr2  | 0.406510064 | + T2D risk | Body    |
| cg20802407 | DYNC111  | chr7  | 0.406528088 | + T2D risk | Body    |
| cg16127200 | ULK4     | chr3  | 0.406616699 | + T2D risk | Body    |
| cg00919921 | DIP2C    | chr10 | 0.406632971 | + T2D risk | Body    |
| cg15902390 | MEIS2    | chr15 | 0.406710917 | - T2D risk | Body    |
| cg14302113 | ITGA1    | chr5  | 0.406717459 | + T2D risk | 1stExon |
| cg04555779 | LAMA4    | chr6  | 0.406739567 | + T2D risk | 5'UTR   |
| cg05501666 | PACRG    | chr6  | 0.40681512  | - T2D risk | Body    |
| cg12444411 | GNA12    | chr7  | 0.406839565 | - T2D risk | Body    |
| cg24646035 | PHACTR1  | chr6  | 0.406887879 | - T2D risk | Body    |
| cg10830021 | NUP98    | chr11 | 0.40709643  | + T2D risk | 5'UTR   |
| cg20653662 | DDHD2    | chr8  | 0.407114446 | - T2D risk | Body    |
| cg22223232 | MAN1A2   | chr1  | 0.407118724 | + T2D risk | Body    |
| cg24729955 | NF1      | chr17 | 0.407340159 | - T2D risk | Body    |
| cg06601347 | TBC1D5   | chr3  | 0.407396152 | + T2D risk | 5'UTR   |
| cg04120815 | RGS7     | chr1  | 0.407426413 | - T2D risk | Body    |
| cg17322503 | CUX1     | chr7  | 0.407451188 | + T2D risk | Body    |
| cg23965109 | ST6GAL1  | chr3  | 0.407460019 | + T2D risk | 5'UTR   |
| cg23965109 | ST6GAL1  | chr3  | 0.407460019 | + T2D risk | TSS1500 |
| cg00648568 | TAZ      | chrX  | 0.407462159 | - T2D risk | Body    |
| cg04868197 | NCOA2    | chr8  | 0.407613118 | - T2D risk | 5'UTR   |
| cg21888923 | PHF21A   | chr11 | 0.407620075 | - T2D risk | Body    |
| cg11679519 | LAMA4    | chr6  | 0.407796354 | - T2D risk | Body    |
| cg10318510 | PRKD1    | chr14 | 0.408137449 | - T2D risk | TSS200  |
| cg21684809 | GNA12    | chr7  | 0.408152044 | - T2D risk | Body    |
| cg21684809 | GNA12    | chr7  | 0.408152044 | - T2D risk | TSS200  |
| cg12710520 | PRMT3    | chr11 | 0.408185022 | - T2D risk | Body    |
| cg18536802 | APC      | chr5  | 0.408333617 | + T2D risk | TSS200  |
| cg15361162 | PLAGL1   | chr6  | 0.408383455 | - T2D risk | 5'UTR   |
| cg04443360 | DDC      | chr7  | 0.408546352 | + T2D risk | TSS200  |
| cg10466225 | TJP1     | chr15 | 0.408747189 | - T2D risk | Body    |
| cg04100532 | UNC80    | chr2  | 0.408762639 | - T2D risk | TSS200  |
| cg16253634 | CALD1    | chr7  | 0.40877507  | - T2D risk | TSS200  |
| cg02199466 | KIAA1217 | chr10 | 0.408785744 | - T2D risk | TSS1500 |
| cg02199466 | KIAA1217 | chr10 | 0.408785744 | - T2D risk | Body    |
| cg06390484 | CALD1    | chr7  | 0.409018438 | - T2D risk | Body    |
| cg06390484 | CALD1    | chr7  | 0.409018438 | - T2D risk | TSS1500 |
| cg14711690 | ITPKB    | chr1  | 0.409169699 | - T2D risk | Body    |
| cg07466622 | PHACTR1  | chr6  | 0.409192366 | - T2D risk | Body    |
| cg02780029 | RET      | chr10 | 0.409247626 | - T2D risk | 3'UTR   |
| cg02780029 | RET      | chr10 | 0.409247626 | - T2D risk | Body    |
| cg04690177 | ARL15    | chr5  | 0.40948138  | + T2D risk | Body    |
| cg02770187 | TTC28    | chr22 | 0.409610235 | + T2D risk | Body    |
| cg05047276 | CRYL1    | chr13 | 0.409613008 | - T2D risk | Body    |
| cg22073916 | ENAH     | chr1  | 0.409772989 | - T2D risk | Body    |
| cg26387435 | CNTNAP2  | chr7  | 0.409864514 | - T2D risk | Body    |
| cg17121447 | GRK5     | chr10 | 0.410130504 | - T2D risk | Body    |
| cg19085156 | ARHGAP32 | chr11 | 0.410178205 | + T2D risk | TSS1500 |
| cg19085156 | ARHGAP32 | chr11 | 0.410178205 | + T2D risk | Body    |
| cg11587658 | MDM1     | chr12 | 0.410553178 | + T2D risk | TSS200  |
| cg02315353 | NGLY1    | chr3  | 0.410732795 | + T2D risk | Body    |
| cg02315353 | NGLY1    | chr3  | 0.410732795 | + T2D risk | TSS1500 |
| cg07063911 | SNX4     | chr3  | 0.411268596 | - T2D risk | Body    |
| cg16028169 | ANK2     | chr4  | 0.411302752 | + T2D risk | TSS1500 |
| cg15985574 | NDUFB3   | chr2  | 0.411407991 | + T2D risk | Body    |
| cg15985574 | NDUFB3   | chr2  | 0.411407991 | + T2D risk | ExonBnd |
| cg15871127 | COL4A1   | chr13 | 0.411541653 | - T2D risk | TSS1500 |



|            |          |       |             |            |         |
|------------|----------|-------|-------------|------------|---------|
| cg11152825 | CDH22    | chr20 | 0.411543647 | + T2D risk | TSS1500 |
| cg02493332 | SLIT3    | chr5  | 0.411610089 | - T2D risk | Body    |
| cg18276474 | GRK5     | chr10 | 0.411761291 | + T2D risk | Body    |
| cg18075666 | CALD1    | chr7  | 0.41187617  | - T2D risk | 5'UTR   |
| cg02697702 | ANK3     | chr10 | 0.411886989 | + T2D risk | Body    |
| cg19584551 | KIAA1217 | chr10 | 0.411950243 | + T2D risk | Body    |
| cg00441269 | PDE5A    | chr4  | 0.411971739 | + T2D risk | Body    |
| cg07055745 | INPP4A   | chr2  | 0.412141646 | + T2D risk | Body    |
| cg09286894 | NQO1     | chr16 | 0.41218855  | + T2D risk | 3'UTR   |
| cg24792209 | TANC2    | chr17 | 0.412204188 | - T2D risk | 3'UTR   |
| cg10556830 | CCNB1    | chr5  | 0.412218026 | + T2D risk | 1stExon |
| cg10556830 | CCNB1    | chr5  | 0.412218026 | + T2D risk | 5'UTR   |
| cg00100549 | CHKA     | chr11 | 0.412264722 | + T2D risk | Body    |
| cg23122913 | ST8SIA1  | chr12 | 0.412489551 | + T2D risk | 5'UTR   |
| cg23122913 | ST8SIA1  | chr12 | 0.412489551 | + T2D risk | Body    |
| cg17042881 | CHID1    | chr11 | 0.412580284 | + T2D risk | Body    |
| cg26025906 | ZDHHC2   | chr8  | 0.412677479 | + T2D risk | 3'UTR   |
| cg07015203 | UNC80    | chr2  | 0.412711313 | + T2D risk | Body    |
| cg09435479 | EFR3A    | chr8  | 0.412757971 | + T2D risk | Body    |
| cg14767833 | TTC28    | chr22 | 0.41279637  | - T2D risk | 3'UTR   |
| cg14482068 | GALK2    | chr15 | 0.412811926 | + T2D risk | TSS1500 |
| cg07465127 | MAN1A1   | chr6  | 0.412882342 | - T2D risk | Body    |
| cg01529466 | PACS1    | chr11 | 0.412964416 | + T2D risk | Body    |
| cg23934546 | PDE7A    | chr8  | 0.413129625 | - T2D risk | Body    |
| cg01237444 | NCOA2    | chr8  | 0.413570122 | - T2D risk | 5'UTR   |
| cg17455688 | NUP98    | chr11 | 0.413636105 | + T2D risk | TSS1500 |
| cg13938970 | PRKCB    | chr16 | 0.413891702 | + T2D risk | Body    |
| cg10046367 | TANC2    | chr17 | 0.413973951 | + T2D risk | TSS1500 |
| cg22346702 | NOL4     | chr18 | 0.414297037 | - T2D risk | 5'UTR   |
| cg22346702 | NOL4     | chr18 | 0.414297037 | - T2D risk | Body    |
| cg25461513 | CADM1    | chr11 | 0.414337702 | - T2D risk | Body    |
| cg25301039 | PRKCB    | chr16 | 0.414365838 | - T2D risk | Body    |
| cg06951739 | SLIT3    | chr5  | 0.41437743  | + T2D risk | Body    |
| cg15318881 | TENM2    | chr5  | 0.414416516 | - T2D risk | Body    |
| cg08454936 | ACTN4    | chr19 | 0.414440592 | - T2D risk | Body    |
| cg04328729 | DIP2C    | chr10 | 0.414535995 | - T2D risk | Body    |
| cg10397419 | PRKCE    | chr2  | 0.414570421 | - T2D risk | Body    |
| cg00846287 | PDLIM5   | chr4  | 0.414585764 | - T2D risk | Body    |
| cg24257168 | CUX1     | chr7  | 0.414592947 | + T2D risk | Body    |
| cg10978194 | NOL4     | chr18 | 0.414619098 | - T2D risk | 5'UTR   |
| cg10978194 | NOL4     | chr18 | 0.414619098 | - T2D risk | Body    |
| cg02036430 | SSBP2    | chr5  | 0.414766828 | + T2D risk | Body    |
| cg17668562 | CCNB1    | chr5  | 0.414881343 | + T2D risk | Body    |
| cg19978273 | MAST1    | chr19 | 0.414953516 | - T2D risk | TSS200  |
| cg13256874 | PRKAG2   | chr7  | 0.414995443 | + T2D risk | Body    |
| cg06249924 | PDE7A    | chr8  | 0.41502672  | + T2D risk | Body    |
| cg02333645 | NCOA7    | chr6  | 0.415105678 | + T2D risk | 5'UTR   |
| cg02333645 | NCOA7    | chr6  | 0.415105678 | + T2D risk | Body    |
| cg10271097 | ATP8A2   | chr13 | 0.415345255 | - T2D risk | Body    |
| cg07833011 | PDK1     | chr2  | 0.415396032 | + T2D risk | TSS200  |
| cg07833011 | PDK1     | chr2  | 0.415396032 | + T2D risk | TSS1500 |
| cg13710297 | ERC2     | chr3  | 0.415443928 | - T2D risk | Body    |
| cg13335567 | NCOA2    | chr8  | 0.415459676 | - T2D risk | Body    |
| cg19679250 | CALD1    | chr7  | 0.415556385 | - T2D risk | TSS1500 |
| cg16053012 | ADCY5    | chr3  | 0.415645453 | + T2D risk | Body    |
| cg15580458 | GRK5     | chr10 | 0.415647803 | + T2D risk | Body    |
| cg09157320 | RHBDD1   | chr2  | 0.41570971  | - T2D risk | Body    |
| cg13285910 | ADCY5    | chr3  | 0.415786668 | + T2D risk | Body    |
| cg01217316 | INPP4A   | chr2  | 0.415819832 | + T2D risk | 5'UTR   |
| cg23898214 | PHACTR1  | chr6  | 0.415943843 | + T2D risk | Body    |
| cg16294280 | BCAT1    | chr12 | 0.415991035 | - T2D risk | Body    |
| cg04186200 | CLASP2   | chr3  | 0.415997069 | - T2D risk | Body    |
| cg04186200 | CLASP2   | chr3  | 0.415997069 | - T2D risk | ExonBnd |
| cg06733114 | CLIC5    | chr6  | 0.416006905 | + T2D risk | Body    |
| cg11667785 | GNA12    | chr7  | 0.416177078 | - T2D risk | Body    |
| cg04517960 | ERC2     | chr3  | 0.416334871 | + T2D risk | TSS1500 |
| cg07999090 | FLT1     | chr13 | 0.416335846 | + T2D risk | Body    |
| cg19063930 | KIAA1217 | chr10 | 0.41642198  | + T2D risk | TSS1500 |
| cg19063930 | KIAA1217 | chr10 | 0.41642198  | + T2D risk | 5'UTR   |
| cg01722003 | CNTNAP2  | chr7  | 0.416475992 | - T2D risk | Body    |



|            |          |       |             |            |         |
|------------|----------|-------|-------------|------------|---------|
| cg16253962 | TSC22D1  | chr13 | 0.416490378 | - T2D risk | Body    |
| cg16253962 | TSC22D1  | chr13 | 0.416490378 | - T2D risk | 5'UTR   |
| cg16253962 | TSC22D1  | chr13 | 0.416490378 | - T2D risk | TSS200  |
| cg03654387 | ERC2     | chr3  | 0.416492725 | + T2D risk | 3'UTR   |
| cg09147066 | KDM4B    | chr19 | 0.416554403 | + T2D risk | 5'UTR   |
| cg08870271 | DDC      | chr7  | 0.416627154 | + T2D risk | Body    |
| cg08814640 | UBE2K    | chr4  | 0.416676178 | - T2D risk | Body    |
| cg22867070 | TOP2A    | chr17 | 0.416770392 | - T2D risk | Body    |
| cg16423638 | CREBBP   | chr16 | 0.41696177  | + T2D risk | Body    |
| cg00152034 | ITGA1    | chr5  | 0.417013458 | + T2D risk | Body    |
| cg16396223 | PRKAG2   | chr7  | 0.417096276 | + T2D risk | Body    |
| cg02107110 | WDR47    | chr1  | 0.417240346 | - T2D risk | 3'UTR   |
| cg05997242 | KDM4B    | chr19 | 0.417403661 | - T2D risk | Body    |
| cg10654443 | WWP2     | chr16 | 0.41788664  | - T2D risk | 5'UTR   |
| cg04335339 | ATRNL1   | chr10 | 0.417983642 | + T2D risk | TSS200  |
| cg09084461 | FLT1     | chr13 | 0.417992329 | - T2D risk | Body    |
| cg02098414 | PHACTR1  | chr6  | 0.418321783 | + T2D risk | Body    |
| cg24301028 | CNTNAP2  | chr7  | 0.418330799 | + T2D risk | Body    |
| cg07096093 | TTC28    | chr22 | 0.418380757 | - T2D risk | Body    |
| cg08260861 | CNTNAP2  | chr7  | 0.418412924 | - T2D risk | Body    |
| cg02648746 | ULK4     | chr3  | 0.418790567 | + T2D risk | TSS1500 |
| cg17964981 | CDH22    | chr20 | 0.418804213 | + T2D risk | Body    |
| cg12300377 | RHBDD1   | chr2  | 0.418805236 | - T2D risk | Body    |
| cg14293758 | SVIP     | chr11 | 0.419026129 | - T2D risk | 1stExon |
| cg10733507 | ZHX2     | chr8  | 0.419094008 | - T2D risk | 5'UTR   |
| cg11883099 | CUX1     | chr7  | 0.4193605   | - T2D risk | Body    |
| cg20223648 | TAB2     | chr6  | 0.419499063 | - T2D risk | 5'UTR   |
| cg20223648 | TAB2     | chr6  | 0.419499063 | - T2D risk | Body    |
| cg07771123 | PTPRU    | chr1  | 0.419506632 | + T2D risk | Body    |
| cg05747134 | MMS19    | chr10 | 0.419703882 | + T2D risk | Body    |
| cg26223654 | MAST1    | chr19 | 0.41996999  | + T2D risk | 5'UTR   |
| cg26223654 | MAST1    | chr19 | 0.41996999  | + T2D risk | 1stExon |
| cg10533057 | FAM160A1 | chr4  | 0.420038315 | - T2D risk | Body    |
| cg17142816 | DIP2C    | chr10 | 0.42022684  | + T2D risk | Body    |
| cg05937573 | ARHGAP32 | chr11 | 0.420234199 | + T2D risk | TSS1500 |
| cg05627289 | PACRG    | chr6  | 0.420301776 | - T2D risk | Body    |
| cg02340253 | TJP1     | chr15 | 0.420362994 | + T2D risk | Body    |
| cg12766607 | RHBDD1   | chr2  | 0.420415019 | + T2D risk | Body    |
| cg19090468 | NDUFB3   | chr2  | 0.420422841 | - T2D risk | 5'UTR   |
| cg19090468 | NDUFB3   | chr2  | 0.420422841 | - T2D risk | 1stExon |
| cg23502751 | DIP2C    | chr10 | 0.420579704 | + T2D risk | Body    |
| cg01275697 | INPP4A   | chr2  | 0.420581291 | - T2D risk | 3'UTR   |
| cg24495383 | PACS1    | chr11 | 0.420717605 | + T2D risk | Body    |
| cg13366899 | SLC29A4  | chr7  | 0.420887697 | + T2D risk | 5'UTR   |
| cg13366899 | SLC29A4  | chr7  | 0.420887697 | + T2D risk | 1stExon |
| cg24945092 | DNAH9    | chr17 | 0.420952155 | + T2D risk | 3'UTR   |
| cg08058836 | MGRN1    | chr16 | 0.421252171 | + T2D risk | TSS1500 |
| cg05929272 | PRKAG2   | chr7  | 0.421331622 | + T2D risk | Body    |
| cg26788616 | CLEC16A  | chr16 | 0.421344692 | + T2D risk | Body    |
| cg09278107 | PACS2    | chr14 | 0.421359244 | - T2D risk | TSS1500 |
| cg11697013 | RAP1GAP2 | chr17 | 0.421504072 | + T2D risk | Body    |
| cg02186409 | FLT1     | chr13 | 0.421551196 | - T2D risk | Body    |
| cg17904068 | CHFR     | chr12 | 0.4216327   | - T2D risk | Body    |
| cg25506045 | SKAP1    | chr17 | 0.421686086 | - T2D risk | Body    |
| cg19992857 | NDUFB3   | chr2  | 0.421825992 | + T2D risk | 5'UTR   |
| cg19992857 | NDUFB3   | chr2  | 0.421825992 | + T2D risk | 1stExon |
| cg19120273 | DIP2C    | chr10 | 0.422035516 | + T2D risk | Body    |
| cg06291627 | ATRNL1   | chr10 | 0.422126284 | + T2D risk | Body    |
| cg11001780 | DIP2C    | chr10 | 0.422268264 | + T2D risk | Body    |
| cg12677481 | GLG1     | chr16 | 0.422357647 | + T2D risk | TSS1500 |
| cg11793689 | ROBO2    | chr3  | 0.422381465 | - T2D risk | Body    |
| cg24386905 | DIP2C    | chr10 | 0.42240342  | + T2D risk | Body    |
| cg07469445 | DIP2C    | chr10 | 0.422546979 | + T2D risk | Body    |
| cg06513979 | DIP2C    | chr10 | 0.422547692 | - T2D risk | Body    |
| cg01080927 | RNF217   | chr6  | 0.422616506 | - T2D risk | Body    |
| cg20990472 | PRKCB    | chr16 | 0.422776637 | + T2D risk | Body    |
| cg26487908 | PTPRU    | chr1  | 0.422931859 | - T2D risk | Body    |
| cg10841988 | PRKCE    | chr2  | 0.423032163 | - T2D risk | Body    |
| cg16605942 | SEZ6L    | chr22 | 0.42316808  | - T2D risk | TSS1500 |
| cg17946266 | PHACTR1  | chr6  | 0.423169495 | - T2D risk | Body    |



|            |                 |       |             |            |         |
|------------|-----------------|-------|-------------|------------|---------|
| cg16183813 | <i>DACH1</i>    | chr13 | 0.423264669 | - T2D risk | 5'UTR   |
| cg16183813 | <i>DACH1</i>    | chr13 | 0.423264669 | - T2D risk | 1stExon |
| cg20085036 | <i>KCNIP3</i>   | chr2  | 0.423277406 | + T2D risk | Body    |
| cg24857609 | <i>NCOA2</i>    | chr8  | 0.423472325 | + T2D risk | 5'UTR   |
| cg02186735 | <i>LAMA4</i>    | chr6  | 0.423554187 | - T2D risk | Body    |
| cg14864167 | <i>PDE7A</i>    | chr8  | 0.423577797 | + T2D risk | Body    |
| cg10643850 | <i>ATRN</i>     | chr20 | 0.423751054 | + T2D risk | Body    |
| cg23981905 | <i>MMS19</i>    | chr10 | 0.423753277 | - T2D risk | TSS1500 |
| cg12740129 | <i>MET</i>      | chr7  | 0.423784352 | - T2D risk | TSS1500 |
| cg16382960 | <i>CLASP2</i>   | chr3  | 0.423804145 | - T2D risk | Body    |
| cg27132802 | <i>CLOCK</i>    | chr4  | 0.423815652 | + T2D risk | TSS200  |
| cg27132802 | <i>CLOCK</i>    | chr4  | 0.423815652 | + T2D risk | 5'UTR   |
| cg13177972 | <i>ANK3</i>     | chr10 | 0.423827863 | - T2D risk | Body    |
| cg09999348 | <i>PRKCE</i>    | chr2  | 0.423860349 | - T2D risk | Body    |
| cg15275786 | <i>SSBP2</i>    | chr5  | 0.423874983 | - T2D risk | Body    |
| cg20886248 | <i>RHBDD1</i>   | chr2  | 0.423934382 | - T2D risk | Body    |
| cg01334081 | <i>TANC2</i>    | chr17 | 0.423952004 | - T2D risk | TSS1500 |
| cg13980639 | <i>HMBX1</i>    | chr8  | 0.42405707  | + T2D risk | 5'UTR   |
| cg25637631 | <i>IFT74</i>    | chr9  | 0.424159984 | - T2D risk | TSS200  |
| cg25637631 | <i>IFT74</i>    | chr9  | 0.424159984 | - T2D risk | 5'UTR   |
| cg19505458 | <i>KIAA1217</i> | chr10 | 0.42423625  | - T2D risk | Body    |
| cg08727316 | <i>KIAA1217</i> | chr10 | 0.424288214 | - T2D risk | Body    |
| cg21997435 | <i>PDLIM5</i>   | chr4  | 0.424396939 | + T2D risk | TSS1500 |
| cg06122921 | <i>DIP2C</i>    | chr10 | 0.424510599 | + T2D risk | Body    |
| cg15928398 | <i>ST6GAL1</i>  | chr3  | 0.424520419 | - T2D risk | TSS1500 |
| cg14891948 | <i>CADM1</i>    | chr11 | 0.424521587 | + T2D risk | Body    |
| cg00567872 | <i>CUX1</i>     | chr7  | 0.424751873 | + T2D risk | Body    |
| cg11549132 | <i>INPP4A</i>   | chr2  | 0.424847382 | - T2D risk | TSS200  |
| cg00930125 | <i>INPP4A</i>   | chr2  | 0.424852804 | + T2D risk | Body    |
| cg16571786 | <i>RNF157</i>   | chr17 | 0.424882191 | - T2D risk | TSS1500 |
| cg03598288 | <i>FNIP2</i>    | chr4  | 0.42493517  | + T2D risk | Body    |
| cg03193551 | <i>PRKAG2</i>   | chr7  | 0.425091759 | + T2D risk | Body    |
| cg11894690 | <i>ATXN1</i>    | chr6  | 0.425160574 | - T2D risk | 5'UTR   |
| cg03815900 | <i>CNTROB</i>   | chr17 | 0.425231847 | - T2D risk | Body    |
| cg02279759 | <i>CRYL1</i>    | chr13 | 0.425278554 | + T2D risk | TSS1500 |
| cg18568335 | <i>PACS2</i>    | chr14 | 0.425326093 | - T2D risk | Body    |
| cg06271237 | <i>PLAGL1</i>   | chr6  | 0.425326376 | + T2D risk | Body    |
| cg12895407 | <i>TENM2</i>    | chr5  | 0.425392592 | - T2D risk | Body    |
| cg22291711 | <i>MEIS2</i>    | chr15 | 0.425566775 | + T2D risk | Body    |
| cg18104149 | <i>ERC2</i>     | chr3  | 0.425870398 | - T2D risk | 5'UTR   |
| cg24600701 | <i>GALK2</i>    | chr15 | 0.426153991 | - T2D risk | Body    |
| cg18430255 | <i>GRK5</i>     | chr10 | 0.426163859 | - T2D risk | Body    |
| cg26073987 | <i>KIAA0232</i> | chr4  | 0.426174591 | + T2D risk | TSS1500 |
| cg23253053 | <i>CUX2</i>     | chr12 | 0.426185199 | - T2D risk | Body    |
| cg01353809 | <i>ARID2</i>    | chr12 | 0.426330635 | - T2D risk | TSS200  |
| cg03034794 | <i>PDK1</i>     | chr2  | 0.426339157 | - T2D risk | Body    |
| cg02606650 | <i>TENM2</i>    | chr5  | 0.42634656  | - T2D risk | Body    |
| cg01603740 | <i>GRK5</i>     | chr10 | 0.426401271 | + T2D risk | Body    |
| cg05211947 | <i>ATP8A1</i>   | chr4  | 0.426460087 | + T2D risk | Body    |
| cg04168997 | <i>EFR3A</i>    | chr8  | 0.42655341  | + T2D risk | Body    |
| cg25494796 | <i>MAN1A1</i>   | chr6  | 0.426603093 | + T2D risk | Body    |
| cg25026667 | <i>PRKCE</i>    | chr2  | 0.426678879 | + T2D risk | Body    |
| cg27650540 | <i>CUX2</i>     | chr12 | 0.426710576 | + T2D risk | Body    |
| cg17545341 | <i>PRKAG2</i>   | chr7  | 0.426721235 | - T2D risk | Body    |
| cg01373599 | <i>DIP2C</i>    | chr10 | 0.426835125 | + T2D risk | Body    |
| cg12583638 | <i>TOX3</i>     | chr16 | 0.426900863 | - T2D risk | Body    |
| cg11159252 | <i>STX6</i>     | chr1  | 0.42693164  | + T2D risk | Body    |
| cg27131579 | <i>RNF217</i>   | chr6  | 0.426952898 | + T2D risk | Body    |
| cg27131579 | <i>RNF217</i>   | chr6  | 0.426952898 | + T2D risk | 3'UTR   |
| cg00579794 | <i>CLEC16A</i>  | chr16 | 0.42700101  | - T2D risk | 3'UTR   |
| cg23571288 | <i>CDK8</i>     | chr13 | 0.427106966 | + T2D risk | 1stExon |
| cg23571288 | <i>CDK8</i>     | chr13 | 0.427106966 | + T2D risk | 5'UTR   |
| cg08999070 | <i>CDH22</i>    | chr20 | 0.427117907 | - T2D risk | Body    |
| cg06879573 | <i>DIP2C</i>    | chr10 | 0.427218103 | + T2D risk | Body    |
| cg04075376 | <i>ATXN1</i>    | chr6  | 0.427270383 | - T2D risk | 5'UTR   |
| cg06997028 | <i>CLOCK</i>    | chr4  | 0.427509719 | - T2D risk | 5'UTR   |
| cg10605829 | <i>APBA1</i>    | chr9  | 0.427522342 | - T2D risk | Body    |
| cg18825119 | <i>PACRG</i>    | chr6  | 0.427659039 | + T2D risk | Body    |
| cg04224811 | <i>ERC2</i>     | chr3  | 0.427691276 | - T2D risk | 3'UTR   |
| cg27021520 | <i>CLASP2</i>   | chr3  | 0.427756416 | - T2D risk | TSS1500 |



|            |           |       |             |            |         |
|------------|-----------|-------|-------------|------------|---------|
| cg14536424 | ASH1L     | chr1  | 0.427833109 | + T2D risk | Body    |
| cg02647929 | MGRN1     | chr16 | 0.427843799 | - T2D risk | Body    |
| cg09884290 | PICALM    | chr11 | 0.427929045 | + T2D risk | Body    |
| cg09614956 | IMPA1     | chr8  | 0.427962216 | + T2D risk | 3'UTR   |
| cg20789821 | CNTNAP2   | chr7  | 0.428134786 | - T2D risk | Body    |
| cg22530144 | PRKCE     | chr2  | 0.428239271 | - T2D risk | Body    |
| cg10591926 | DIP2C     | chr10 | 0.428274626 | - T2D risk | Body    |
| cg07620853 | GAD1      | chr2  | 0.428399451 | - T2D risk | Body    |
| cg19087177 | ENAH      | chr1  | 0.428404672 | - T2D risk | Body    |
| cg12053543 | LAMA4     | chr6  | 0.428495325 | - T2D risk | Body    |
| cg20227241 | CNTROB    | chr17 | 0.428633137 | + T2D risk | 1stExon |
| cg20227241 | CNTROB    | chr17 | 0.428633137 | + T2D risk | 5'UTR   |
| cg14002960 | NOL4      | chr18 | 0.428648234 | - T2D risk | Body    |
| cg05733361 | PDE8A     | chr15 | 0.428715009 | + T2D risk | TSS1500 |
| cg13966241 | BCAT1     | chr12 | 0.428771682 | - T2D risk | Body    |
| cg13966241 | BCAT1     | chr12 | 0.428771682 | - T2D risk | TSS1500 |
| cg14303481 | SLIT3     | chr5  | 0.428799458 | + T2D risk | Body    |
| cg21938148 | COL4A1    | chr13 | 0.428825862 | - T2D risk | Body    |
| cg06402738 | CLIC5     | chr6  | 0.428917825 | + T2D risk | TSS1500 |
| cg06402738 | CLIC5     | chr6  | 0.428917825 | + T2D risk | Body    |
| cg16024891 | RAP1GAP2  | chr17 | 0.42894086  | + T2D risk | Body    |
| cg20706192 | HNRNPA2B1 | chr7  | 0.429041365 | + T2D risk | TSS1500 |
| cg25262044 | DKK2      | chr4  | 0.429110148 | - T2D risk | TSS1500 |
| cg14442394 | HMBOX1    | chr8  | 0.429148748 | - T2D risk | TSS200  |
| cg14442394 | HMBOX1    | chr8  | 0.429148748 | - T2D risk | TSS1500 |
| cg18814402 | INPP4A    | chr2  | 0.429150755 | + T2D risk | Body    |
| cg05966059 | UNC80     | chr2  | 0.429170967 | - T2D risk | Body    |
| cg20700952 | USP29     | chr19 | 0.429175942 | + T2D risk | TSS1500 |
| cg08206308 | NCOR1     | chr17 | 0.429184115 | + T2D risk | TSS1500 |
| cg12757684 | PLAGL1    | chr6  | 0.429202767 | - T2D risk | 5'UTR   |
| cg12757684 | PLAGL1    | chr6  | 0.429202767 | - T2D risk | 1stExon |
| cg03081478 | GNA12     | chr7  | 0.429396582 | - T2D risk | Body    |
| cg01927532 | PDE3A     | chr12 | 0.429415408 | + T2D risk | Body    |
| cg27400561 | KCNIP3    | chr2  | 0.429542886 | - T2D risk | Body    |
| cg08689932 | KCNJ18    | chr17 | 0.429564437 | + T2D risk | TSS1500 |
| cg08689932 | KCNJ12    | chr17 | 0.429564437 | + T2D risk | 5'UTR   |
| cg04404956 | PRKD1     | chr14 | 0.429564945 | + T2D risk | Body    |
| cg25464696 | HMBOX1    | chr8  | 0.429642626 | - T2D risk | Body    |
| cg10062150 | TMEM59    | chr1  | 0.429827191 | + T2D risk | 5'UTR   |
| cg10062150 | TMEM59    | chr1  | 0.429827191 | + T2D risk | Body    |
| cg08782022 | MGRN1     | chr16 | 0.429828079 | - T2D risk | Body    |
| cg08751352 | UBL3      | chr13 | 0.42983985  | - T2D risk | Body    |
| cg09137729 | PLAGL1    | chr6  | 0.430092847 | - T2D risk | 5'UTR   |
| cg09137729 | PLAGL1    | chr6  | 0.430092847 | - T2D risk | ExonBnd |
| cg03022575 | ULK4      | chr3  | 0.430098526 | + T2D risk | TSS200  |
| cg22873412 | PDE7A     | chr8  | 0.43020294  | + T2D risk | Body    |
| cg12978142 | CADM1     | chr11 | 0.430245008 | + T2D risk | Body    |
| cg26892401 | GNA12     | chr7  | 0.430290797 | + T2D risk | Body    |
| cg07259733 | BCAT1     | chr12 | 0.430325715 | - T2D risk | TSS1500 |
| cg22476055 | CLEC16A   | chr16 | 0.43040979  | - T2D risk | Body    |
| cg03703833 | CTR9      | chr11 | 0.43042678  | - T2D risk | Body    |
| cg25617952 | PDK1      | chr2  | 0.430459226 | + T2D risk | Body    |
| cg17160317 | NOL4      | chr18 | 0.430478861 | + T2D risk | 5'UTR   |
| cg17160317 | NOL4      | chr18 | 0.430478861 | + T2D risk | Body    |
| cg06104007 | GALK2     | chr15 | 0.430484676 | + T2D risk | 5'UTR   |
| cg06104007 | GALK2     | chr15 | 0.430484676 | + T2D risk | 1stExon |
| cg02577963 | KDM4B     | chr19 | 0.430647047 | + T2D risk | Body    |
| cg14180318 | RCAN2     | chr6  | 0.430766394 | - T2D risk | Body    |
| cg07486252 | ANK2      | chr4  | 0.430887022 | - T2D risk | Body    |
| cg02275396 | WIZ       | chr19 | 0.430929319 | + T2D risk | Body    |
| cg00181964 | PACS2     | chr14 | 0.430933371 | + T2D risk | Body    |
| cg00181964 | PACS2     | chr14 | 0.430933371 | + T2D risk | 5'UTR   |
| cg25299666 | TTC28     | chr22 | 0.431004637 | - T2D risk | Body    |
| cg07080147 | UNC80     | chr2  | 0.431025529 | - T2D risk | Body    |
| cg16451027 | APC       | chr5  | 0.431070408 | - T2D risk | TSS1500 |
| cg26480862 | TTC28     | chr22 | 0.431167051 | + T2D risk | Body    |
| cg27233847 | DIP2C     | chr10 | 0.431289326 | + T2D risk | Body    |
| cg01536668 | CREBBP    | chr16 | 0.431371148 | - T2D risk | Body    |
| cg10920342 | PPP1R12A  | chr12 | 0.431411205 | + T2D risk | Body    |
| cg20730432 | ARL8B     | chr3  | 0.431488341 | - T2D risk | Body    |



|            |          |       |             |            |         |
|------------|----------|-------|-------------|------------|---------|
| cg14607415 | PRKACB   | chr1  | 0.431531261 | + T2D risk | Body    |
| cg14607415 | PRKACB   | chr1  | 0.431531261 | + T2D risk | TSS1500 |
| cg16134349 | ANK3     | chr10 | 0.431594349 | - T2D risk | 1stExon |
| cg16134349 | ANK3     | chr10 | 0.431594349 | - T2D risk | 5'UTR   |
| cg16134349 | ANK3     | chr10 | 0.431594349 | - T2D risk | Body    |
| cg14003320 | ASXL2    | chr2  | 0.431637344 | - T2D risk | Body    |
| cg03196689 | RSF1     | chr11 | 0.431667284 | + T2D risk | Body    |
| cg17808646 | PFKFB2   | chr1  | 0.43169393  | + T2D risk | TSS1500 |
| cg00053839 | CUX1     | chr7  | 0.431796032 | - T2D risk | Body    |
| cg03762314 | SLC29A4  | chr7  | 0.431821505 | + T2D risk | Body    |
| cg11857210 | CLASP2   | chr3  | 0.431824991 | + T2D risk | Body    |
| cg05710613 | RSF1     | chr11 | 0.432061529 | + T2D risk | Body    |
| cg22321985 | CREBBP   | chr16 | 0.432104669 | - T2D risk | 3'UTR   |
| cg21222911 | SVIP     | chr11 | 0.432223478 | + T2D risk | TSS1500 |
| cg16619991 | ITGA1    | chr5  | 0.432242524 | + T2D risk | Body    |
| cg10963021 | CREBBP   | chr16 | 0.432447065 | - T2D risk | Body    |
| cg01100868 | SLIT3    | chr5  | 0.432575436 | - T2D risk | Body    |
| cg10683548 | ANK2     | chr4  | 0.432609261 | - T2D risk | Body    |
| cg02175739 | CHID1    | chr11 | 0.432697366 | - T2D risk | Body    |
| cg02172182 | ANK3     | chr10 | 0.432701223 | + T2D risk | Body    |
| cg02953559 | ADCY5    | chr3  | 0.432837599 | - T2D risk | Body    |
| cg22847846 | RET      | chr10 | 0.432850223 | - T2D risk | Body    |
| cg10226218 | RRAGB    | chrX  | 0.432863161 | + T2D risk | Body    |
| cg26535616 | ACSS2    | chr20 | 0.43289509  | + T2D risk | TSS1500 |
| cg26535616 | ACSS2    | chr20 | 0.43289509  | + T2D risk | 5'UTR   |
| cg26535616 | ACSS2    | chr20 | 0.43289509  | + T2D risk | 1stExon |
| cg19344725 | SCARB2   | chr4  | 0.432946251 | - T2D risk | Body    |
| cg07963705 | ITGB1    | chr10 | 0.433034425 | - T2D risk | Body    |
| cg01276222 | CCNB1    | chr5  | 0.433039794 | - T2D risk | Body    |
| cg16498359 | SLC29A4  | chr7  | 0.433067496 | + T2D risk | Body    |
| cg15959238 | CALD1    | chr7  | 0.433122957 | - T2D risk | Body    |
| cg15959238 | CALD1    | chr7  | 0.433122957 | - T2D risk | TSS200  |
| cg14383014 | SRPK2    | chr7  | 0.43316865  | - T2D risk | Body    |
| cg18416981 | CHKA     | chr11 | 0.433272092 | + T2D risk | 3'UTR   |
| cg25994883 | GGPS1    | chr1  | 0.433290079 | + T2D risk | TSS1500 |
| cg24979438 | ARL15    | chr5  | 0.433457994 | - T2D risk | Body    |
| cg01280655 | LMCD1    | chr3  | 0.433483089 | + T2D risk | 5'UTR   |
| cg01280655 | LMCD1    | chr3  | 0.433483089 | + T2D risk | Body    |
| cg19777066 | KANTR    | chrX  | 0.433559634 | - T2D risk | Body    |
| cg00648911 | ANK2     | chr4  | 0.433564454 | - T2D risk | ExonBnd |
| cg00648911 | ANK2     | chr4  | 0.433564454 | - T2D risk | Body    |
| cg16084313 | KIAA1217 | chr10 | 0.433709881 | + T2D risk | Body    |
| cg11597447 | STX6     | chr1  | 0.433726051 | - T2D risk | Body    |
| cg18813128 | CADM1    | chr11 | 0.433745522 | - T2D risk | Body    |
| cg05974003 | COL4A1   | chr13 | 0.433764624 | + T2D risk | Body    |
| cg00512487 | ATRN     | chr20 | 0.433932378 | - T2D risk | 1stExon |
| cg00809147 | SLIT3    | chr5  | 0.433956141 | + T2D risk | Body    |
| cg06639440 | CHID1    | chr11 | 0.434037785 | + T2D risk | TSS200  |
| cg26732155 | MEIS2    | chr15 | 0.434117953 | + T2D risk | Body    |
| cg19252199 | COL4A1   | chr13 | 0.434195158 | + T2D risk | TSS1500 |
| cg27463953 | ATRN     | chr20 | 0.434217902 | - T2D risk | TSS1500 |
| cg09644309 | DACH1    | chr13 | 0.434267406 | + T2D risk | Body    |
| cg18848677 | PRKCB    | chr16 | 0.434270936 | + T2D risk | Body    |
| cg20952131 | TPCN1    | chr12 | 0.434564874 | + T2D risk | Body    |
| cg15337646 | CHFR     | chr12 | 0.43460778  | - T2D risk | TSS1500 |
| cg17254607 | ERC2     | chr3  | 0.434614344 | - T2D risk | 3'UTR   |
| cg10071690 | DIP2C    | chr10 | 0.434705408 | - T2D risk | Body    |
| cg25063058 | ARPP19   | chr15 | 0.434760072 | - T2D risk | Body    |
| cg26573683 | CUX1     | chr7  | 0.434848941 | - T2D risk | Body    |
| cg11461133 | GNA12    | chr7  | 0.434969317 | - T2D risk | TSS200  |
| cg07113164 | TAZ      | chrX  | 0.435014291 | + T2D risk | Body    |
| cg01785153 | SLIT3    | chr5  | 0.435144516 | + T2D risk | Body    |
| cg23821914 | RBM4     | chr11 | 0.435275949 | - T2D risk | Body    |
| cg21746573 | PRKCE    | chr2  | 0.4353294   | - T2D risk | Body    |
| cg03363242 | HMBOX1   | chr8  | 0.435397286 | + T2D risk | TSS200  |
| cg03363242 | HMBOX1   | chr8  | 0.435397286 | + T2D risk | TSS1500 |
| cg10904471 | MAN1A1   | chr6  | 0.435432889 | - T2D risk | Body    |
| cg21681030 | RHOQ     | chr2  | 0.435567986 | + T2D risk | Body    |
| cg14330593 | INPP4A   | chr2  | 0.4355907   | - T2D risk | Body    |
| cg09533946 | KDM4B    | chr19 | 0.43564086  | - T2D risk | 5'UTR   |



|            |          |       |             |            |         |
|------------|----------|-------|-------------|------------|---------|
| cg19447221 | KIAA1217 | chr10 | 0.435879744 | + T2D risk | 5'UTR   |
| cg05232977 | KIAA1217 | chr10 | 0.435903158 | - T2D risk | 5'UTR   |
| cg05232977 | KIAA1217 | chr10 | 0.435903158 | - T2D risk | Body    |
| cg23015138 | RAP1GAP2 | chr17 | 0.435932488 | + T2D risk | Body    |
| cg02612836 | APBA1    | chr9  | 0.436041311 | + T2D risk | 5'UTR   |
| cg11989218 | CHFR     | chr12 | 0.436055074 | + T2D risk | Body    |
| cg16594957 | CREBBP   | chr16 | 0.436097519 | + T2D risk | 3'UTR   |
| cg20256804 | DIP2C    | chr10 | 0.436197788 | + T2D risk | Body    |
| cg06394961 | KIAA1217 | chr10 | 0.436288453 | - T2D risk | 5'UTR   |
| cg02342962 | TENM2    | chr5  | 0.436289634 | - T2D risk | Body    |
| cg11820745 | TOP2A    | chr17 | 0.436292572 | + T2D risk | Body    |
| cg15917362 | PRKD1    | chr14 | 0.436342174 | + T2D risk | Body    |
| cg20981245 | CUX1     | chr7  | 0.436366211 | + T2D risk | Body    |
| cg01055232 | AMD1     | chr6  | 0.436392693 | + T2D risk | 5'UTR   |
| cg18224734 | PDLIM5   | chr4  | 0.43639567  | - T2D risk | 5'UTR   |
| cg18224734 | PDLIM5   | chr4  | 0.43639567  | - T2D risk | Body    |
| cg12158535 | PACS2    | chr14 | 0.43639715  | - T2D risk | Body    |
| cg20643012 | DNAH9    | chr17 | 0.4364269   | + T2D risk | TSS200  |
| cg02205401 | SEC31A   | chr4  | 0.436446073 | - T2D risk | 5'UTR   |
| cg02205401 | SEC31A   | chr4  | 0.436446073 | - T2D risk | Body    |
| cg27146011 | WIZ      | chr19 | 0.436494295 | + T2D risk | Body    |
| cg05289022 | TMEM131  | chr2  | 0.436509796 | + T2D risk | Body    |
| cg01948062 | CADM1    | chr11 | 0.436538302 | - T2D risk | TSS1500 |
| cg26544725 | DNAJC1   | chr10 | 0.436654248 | + T2D risk | Body    |
| cg03892569 | PHACTR1  | chr6  | 0.436817473 | + T2D risk | Body    |
| cg16829042 | CUX1     | chr7  | 0.436904081 | + T2D risk | Body    |
| cg01144889 | SLIT3    | chr5  | 0.437017728 | + T2D risk | Body    |
| cg10155983 | CLEC16A  | chr16 | 0.437090426 | - T2D risk | Body    |
| cg06996663 | ATP6V1H  | chr8  | 0.437156621 | - T2D risk | TSS200  |
| cg06996663 | ATP6V1H  | chr8  | 0.437156621 | - T2D risk | TSS1500 |
| cg25087601 | ARHGAP32 | chr11 | 0.437170285 | - T2D risk | Body    |
| cg07918578 | SEZ6L    | chr22 | 0.437250226 | - T2D risk | Body    |
| cg05544394 | DIP2C    | chr10 | 0.437321508 | - T2D risk | Body    |
| cg04680907 | CALD1    | chr7  | 0.437395795 | + T2D risk | Body    |
| cg00324510 | PACS1    | chr11 | 0.437482856 | - T2D risk | Body    |
| cg22678707 | NPAT     | chr11 | 0.437523164 | - T2D risk | Body    |
| cg25181236 | CLOCK    | chr4  | 0.437604485 | - T2D risk | 5'UTR   |
| cg14859916 | CNTNAP2  | chr7  | 0.437752263 | - T2D risk | Body    |
| cg11914194 | FLT1     | chr13 | 0.43779033  | - T2D risk | Body    |
| cg00687668 | ASH1L    | chr1  | 0.437863071 | - T2D risk | Body    |
| cg08397390 | UXS1     | chr2  | 0.437970584 | + T2D risk | Body    |
| cg03282630 | FARSB    | chr2  | 0.438176944 | - T2D risk | Body    |
| cg01901898 | ATP6V1A  | chr3  | 0.438255549 | - T2D risk | TSS1500 |
| cg10708675 | NQO1     | chr16 | 0.438359228 | - T2D risk | TSS1500 |
| cg04932464 | KIAA0232 | chr4  | 0.438405606 | + T2D risk | 5'UTR   |
| cg09377736 | CALD1    | chr7  | 0.43846019  | - T2D risk | Body    |
| cg09520037 | ZHX2     | chr8  | 0.438482992 | - T2D risk | 5'UTR   |
| cg01656717 | WWP2     | chr16 | 0.438533654 | + T2D risk | Body    |
| cg11053561 | CHID1    | chr11 | 0.438584496 | + T2D risk | 3'UTR   |
| cg22992794 | SPOCK1   | chr5  | 0.438622156 | + T2D risk | Body    |
| cg03669245 | SSBP2    | chr5  | 0.438639382 | - T2D risk | Body    |
| cg09066988 | ANK2     | chr4  | 0.438646165 | + T2D risk | Body    |
| cg25553730 | CUX1     | chr7  | 0.438651821 | - T2D risk | Body    |
| cg22183626 | TSC22D1  | chr13 | 0.438808203 | + T2D risk | TSS1500 |
| cg27299484 | ATP8A1   | chr4  | 0.438814206 | + T2D risk | Body    |
| cg20689626 | SLC7A2   | chr8  | 0.438858814 | - T2D risk | TSS1500 |
| cg06525993 | TJP1     | chr15 | 0.439013748 | - T2D risk | Body    |
| cg04264958 | GALK2    | chr15 | 0.439096729 | + T2D risk | 5'UTR   |
| cg04264958 | GALK2    | chr15 | 0.439096729 | + T2D risk | Body    |
| cg01588379 | PRKAG2   | chr7  | 0.439124364 | - T2D risk | Body    |
| cg06736849 | SEC31A   | chr4  | 0.439470345 | - T2D risk | Body    |
| cg07607536 | RAP1GAP2 | chr17 | 0.439488251 | + T2D risk | Body    |
| cg06886080 | PACS1    | chr11 | 0.439582529 | - T2D risk | Body    |
| cg08755532 | KCNIP3   | chr2  | 0.439689015 | - T2D risk | Body    |
| cg16516888 | RSF1     | chr11 | 0.439706656 | - T2D risk | TSS1500 |
| cg04578183 | PRKAG2   | chr7  | 0.439830703 | + T2D risk | Body    |
| cg09893431 | DIP2C    | chr10 | 0.439879312 | + T2D risk | Body    |
| cg06781086 | DYNC1I2  | chr2  | 0.439889176 | + T2D risk | Body    |
| cg24886068 | ATXN1    | chr6  | 0.440114383 | + T2D risk | 5'UTR   |
| cg05445263 | CRYL1    | chr13 | 0.440121068 | - T2D risk | Body    |



|            |         |       |             |            |         |
|------------|---------|-------|-------------|------------|---------|
| cg01890075 | CUX1    | chr7  | 0.440131439 | - T2D risk | 3'UTR   |
| cg23053299 | ITGA1   | chr5  | 0.44024065  | + T2D risk | TSS1500 |
| cg08613606 | DIP2C   | chr10 | 0.440302128 | + T2D risk | Body    |
| cg06730364 | CNTNAP2 | chr7  | 0.440351065 | - T2D risk | Body    |
| cg20153409 | GAD1    | chr2  | 0.440466585 | - T2D risk | Body    |
| cg06916597 | SLIT3   | chr5  | 0.440772247 | - T2D risk | Body    |
| cg15048607 | CLOCK   | chr4  | 0.440803769 | + T2D risk | Body    |
| cg14488626 | SLIT3   | chr5  | 0.440829347 | + T2D risk | Body    |
| cg22228556 | ST20    | chr15 | 0.44099957  | - T2D risk | 5'UTR   |
| cg22228556 | ST20    | chr15 | 0.44099957  | - T2D risk | Body    |
| cg24145039 | MAST1   | chr19 | 0.441033921 | + T2D risk | Body    |
| cg00797346 | MEIS2   | chr15 | 0.44105176  | - T2D risk | 5'UTR   |
| cg00797346 | MEIS2   | chr15 | 0.44105176  | - T2D risk | 1stExon |
| cg00797346 | MEIS2   | chr15 | 0.44105176  | - T2D risk | Body    |
| cg00797346 | MEIS2   | chr15 | 0.44105176  | - T2D risk | TSS1500 |
| cg08559978 | AGPAT3  | chr21 | 0.441302682 | + T2D risk | 5'UTR   |
| cg10558228 | ASH1L   | chr1  | 0.441367765 | - T2D risk | TSS1500 |
| cg03084158 | GNA12   | chr7  | 0.441404328 | + T2D risk | Body    |
| cg05575995 | ITGA1   | chr5  | 0.4414099   | + T2D risk | TSS1500 |
| cg02483529 | DIP2C   | chr10 | 0.441539408 | + T2D risk | Body    |
| cg11849461 | DNAH9   | chr17 | 0.441804477 | + T2D risk | Body    |
| cg17545875 | CUX1    | chr7  | 0.441829642 | - T2D risk | Body    |
| cg12470036 | DIP2C   | chr10 | 0.441889475 | - T2D risk | Body    |
| cg01943520 | AGPAT3  | chr21 | 0.442032408 | + T2D risk | 5'UTR   |
| cg16445423 | TMEM131 | chr2  | 0.44203851  | + T2D risk | Body    |
| cg11804641 | SKAP1   | chr17 | 0.442053548 | + T2D risk | Body    |
| cg06819775 | RAP1B   | chr12 | 0.442116198 | + T2D risk | TSS1500 |
| cg20293888 | GNA12   | chr7  | 0.442169676 | + T2D risk | Body    |
| cg08507436 | RSF1    | chr11 | 0.442173519 | - T2D risk | Body    |
| cg00795520 | TAB2    | chr6  | 0.442178495 | + T2D risk | 5'UTR   |
| cg00795520 | TAB2    | chr6  | 0.442178495 | + T2D risk | Body    |
| cg01306891 | DIP2C   | chr10 | 0.442425149 | - T2D risk | Body    |
| cg22231602 | RGS7    | chr1  | 0.442524298 | + T2D risk | Body    |
| cg00767846 | SSB     | chr2  | 0.442596716 | - T2D risk | 1stExon |
| cg00767846 | SSB     | chr2  | 0.442596716 | - T2D risk | 5'UTR   |
| cg14618411 | NCOA2   | chr8  | 0.442624341 | - T2D risk | 5'UTR   |
| cg16142698 | DNAJC13 | chr3  | 0.442694794 | - T2D risk | TSS1500 |
| cg00168106 | PACS1   | chr11 | 0.442701406 | - T2D risk | Body    |
| cg11756080 | ERC2    | chr3  | 0.442750107 | + T2D risk | Body    |
| cg25645338 | APC     | chr5  | 0.442885475 | - T2D risk | 5'UTR   |
| cg10553088 | CADM1   | chr11 | 0.443101415 | + T2D risk | Body    |
| cg06646604 | PDE8A   | chr15 | 0.443185677 | - T2D risk | Body    |
| cg22150335 | ANK3    | chr10 | 0.443212731 | + T2D risk | Body    |
| cg02473562 | CDH22   | chr20 | 0.443228775 | + T2D risk | Body    |
| cg24646561 | ST20    | chr15 | 0.443231634 | + T2D risk | TSS200  |
| cg24646561 | ST20    | chr15 | 0.443231634 | + T2D risk | Body    |
| cg12591302 | MMS19   | chr10 | 0.443464381 | - T2D risk | TSS200  |
| cg02429514 | NCOR1   | chr17 | 0.44348007  | - T2D risk | Body    |
| cg25355904 | CUX1    | chr7  | 0.443554388 | + T2D risk | Body    |
| cg02512697 | RCAN2   | chr6  | 0.443560486 | - T2D risk | 5'UTR   |
| cg02512697 | RCAN2   | chr6  | 0.443560486 | - T2D risk | 1stExon |
| cg02512697 | RCAN2   | chr6  | 0.443560486 | - T2D risk | Body    |
| cg02709321 | TOX3    | chr16 | 0.443618549 | - T2D risk | 5'UTR   |
| cg02709321 | TOX3    | chr16 | 0.443618549 | - T2D risk | TSS1500 |
| cg22338152 | USP29   | chr19 | 0.443621525 | + T2D risk | Body    |
| cg07259683 | MEIS2   | chr15 | 0.443673228 | - T2D risk | Body    |
| cg17933295 | KDM4B   | chr19 | 0.443802728 | + T2D risk | Body    |
| cg10469659 | SPPL2A  | chr15 | 0.443859225 | - T2D risk | 1stExon |
| cg19078574 | INPP4A  | chr2  | 0.44391899  | + T2D risk | TSS200  |
| cg24639176 | PHACTR1 | chr6  | 0.444019708 | + T2D risk | Body    |
| cg05616819 | PRKCB   | chr16 | 0.444057076 | + T2D risk | 3'UTR   |
| cg18675899 | TENM2   | chr5  | 0.444061122 | + T2D risk | Body    |
| cg11086275 | STX6    | chr1  | 0.444079422 | - T2D risk | Body    |
| cg18226451 | PLEKHG3 | chr14 | 0.444398205 | + T2D risk | 5'UTR   |
| cg15726556 | ATP6V1A | chr3  | 0.444467247 | - T2D risk | 5'UTR   |
| cg21628055 | GNA12   | chr7  | 0.444489482 | - T2D risk | Body    |
| cg14600855 | CLIC5   | chr6  | 0.444532953 | + T2D risk | Body    |
| cg20534694 | PRKAG2  | chr7  | 0.444606492 | - T2D risk | TSS1500 |
| cg20534694 | PRKAG2  | chr7  | 0.444606492 | - T2D risk | Body    |
| cg00619087 | SRPK2   | chr7  | 0.444634941 | + T2D risk | Body    |



|            |          |       |             |            |         |
|------------|----------|-------|-------------|------------|---------|
| cg00619087 | SRPK2    | chr7  | 0.444634941 | + T2D risk | 5'UTR   |
| cg11994439 | CLEC16A  | chr16 | 0.444650071 | + T2D risk | Body    |
| cg17256791 | PDE8A    | chr15 | 0.444771456 | + T2D risk | 5'UTR   |
| cg17256791 | PDE8A    | chr15 | 0.444771456 | + T2D risk | Body    |
| cg04709373 | WWP2     | chr16 | 0.444779195 | - T2D risk | Body    |
| cg13263104 | NF1      | chr17 | 0.444779362 | - T2D risk | Body    |
| cg19542090 | PDE8A    | chr15 | 0.444915411 | + T2D risk | TSS1500 |
| cg01596289 | PACRG    | chr6  | 0.444927983 | - T2D risk | Body    |
| cg12643008 | KREMEN1  | chr22 | 0.445047921 | - T2D risk | Body    |
| cg09117950 | NCOR1    | chr17 | 0.4450688   | + T2D risk | Body    |
| cg23473401 | PRKCB    | chr16 | 0.445098021 | - T2D risk | Body    |
| cg14494607 | CLIC5    | chr6  | 0.445683389 | + T2D risk | Body    |
| cg05053968 | CCNB1    | chr5  | 0.445767657 | + T2D risk | Body    |
| cg26570844 | CUX1     | chr7  | 0.4458228   | + T2D risk | Body    |
| cg26997596 | GALK2    | chr15 | 0.445865333 | + T2D risk | Body    |
| cg09678615 | TOX3     | chr16 | 0.445897258 | + T2D risk | 5'UTR   |
| cg09678615 | TOX3     | chr16 | 0.445897258 | + T2D risk | Body    |
| cg01345637 | CADM1    | chr11 | 0.445905484 | - T2D risk | Body    |
| cg04934204 | PACS2    | chr14 | 0.445920744 | - T2D risk | 5'UTR   |
| cg04934204 | PACS2    | chr14 | 0.445920744 | - T2D risk | Body    |
| cg06622286 | RTN4     | chr2  | 0.446122445 | + T2D risk | Body    |
| cg06622286 | RTN4     | chr2  | 0.446122445 | + T2D risk | 5'UTR   |
| cg27556675 | ATRN     | chr20 | 0.44614382  | + T2D risk | Body    |
| cg09477426 | TMEM19   | chr16 | 0.446167125 | + T2D risk | Body    |
| cg04122422 | ARHGAP32 | chr11 | 0.446167353 | + T2D risk | Body    |
| cg26955835 | DKK2     | chr4  | 0.44618054  | + T2D risk | 1stExon |
| cg26955835 | DKK2     | chr4  | 0.44618054  | + T2D risk | 5'UTR   |
| cg05903872 | DIP2C    | chr10 | 0.446201779 | - T2D risk | Body    |
| cg11066280 | TTC28    | chr22 | 0.446355627 | - T2D risk | Body    |
| cg10717379 | PLAGL1   | chr6  | 0.446449612 | - T2D risk | 5'UTR   |
| cg06780255 | ANK2     | chr4  | 0.446455646 | + T2D risk | Body    |
| cg12679308 | CUX1     | chr7  | 0.446555007 | + T2D risk | Body    |
| cg13484357 | SLC30A8  | chr8  | 0.44656271  | - T2D risk | 5'UTR   |
| cg08536167 | TSGA10   | chr2  | 0.44664728  | - T2D risk | 5'UTR   |
| cg08536167 | TSGA10   | chr2  | 0.44664728  | - T2D risk | TSS200  |
| cg23337361 | PHACTR1  | chr6  | 0.446660784 | + T2D risk | Body    |
| cg12948619 | CUX2     | chr12 | 0.446739715 | + T2D risk | Body    |
| cg24387389 | ATP8A2   | chr13 | 0.446850879 | - T2D risk | Body    |
| cg22403971 | MAN1A1   | chr6  | 0.447145909 | + T2D risk | TSS1500 |
| cg22019065 | UNC80    | chr2  | 0.447169227 | - T2D risk | Body    |
| cg04922772 | EFR3A    | chr8  | 0.447280822 | + T2D risk | Body    |
| cg21218883 | PRKCE    | chr2  | 0.447650439 | + T2D risk | Body    |
| cg07784478 | CUX1     | chr7  | 0.447842845 | + T2D risk | Body    |
| cg08342791 | WWP2     | chr16 | 0.447875933 | + T2D risk | Body    |
| cg02473953 | RBBP6    | chr16 | 0.447880471 | + T2D risk | TSS1500 |
| cg25793592 | SKAP1    | chr17 | 0.447898584 | - T2D risk | Body    |
| cg11760361 | TTC28    | chr22 | 0.447975756 | + T2D risk | Body    |
| cg20793071 | TMEM59   | chr1  | 0.448002493 | + T2D risk | TSS1500 |
| cg19874047 | CUX1     | chr7  | 0.448026325 | + T2D risk | 5'UTR   |
| cg19874047 | CUX1     | chr7  | 0.448026325 | + T2D risk | TSS200  |
| cg19874047 | CUX1     | chr7  | 0.448026325 | + T2D risk | 1stExon |
| cg14045725 | SGSM2    | chr17 | 0.448033715 | + T2D risk | 5'UTR   |
| cg14045725 | SGSM2    | chr17 | 0.448033715 | + T2D risk | 1stExon |
| cg00739778 | RAP1GAP2 | chr17 | 0.448158715 | - T2D risk | Body    |
| cg15610170 | ST6GAL1  | chr3  | 0.448162529 | - T2D risk | 5'UTR   |
| cg18068715 | ERC2     | chr3  | 0.448196886 | - T2D risk | Body    |
| cg11520554 | ST20     | chr15 | 0.448317892 | - T2D risk | 5'UTR   |
| cg11520554 | ST20     | chr15 | 0.448317892 | - T2D risk | 1stExon |
| cg06068379 | COL4A1   | chr13 | 0.448412438 | - T2D risk | Body    |
| cg11111332 | DDC      | chr7  | 0.448496535 | - T2D risk | 5'UTR   |
| cg27172916 | ENAH     | chr1  | 0.448502636 | + T2D risk | Body    |
| cg17387870 | CHFR     | chr12 | 0.448536648 | + T2D risk | Body    |
| cg10752869 | MEIS2    | chr15 | 0.44856487  | - T2D risk | 5'UTR   |
| cg10752869 | MEIS2    | chr15 | 0.44856487  | - T2D risk | 1stExon |
| cg10752869 | MEIS2    | chr15 | 0.44856487  | - T2D risk | Body    |
| cg10752869 | MEIS2    | chr15 | 0.44856487  | - T2D risk | TSS1500 |
| cg23895155 | PACS2    | chr14 | 0.448565193 | + T2D risk | 3'UTR   |
| cg26967305 | KREMEN1  | chr22 | 0.448605007 | + T2D risk | 3'UTR   |
| cg11261859 | KDM4B    | chr19 | 0.448663954 | - T2D risk | 5'UTR   |
| cg02609692 | LMX1B    | chr9  | 0.448761809 | - T2D risk | Body    |



|            |          |       |             |            |         |
|------------|----------|-------|-------------|------------|---------|
| cg08845722 | PRKCE    | chr2  | 0.448788848 | + T2D risk | Body    |
| cg01763575 | CDH22    | chr20 | 0.448900226 | + T2D risk | Body    |
| cg09916174 | CALD1    | chr7  | 0.448968817 | - T2D risk | Body    |
| cg09916174 | CALD1    | chr7  | 0.448968817 | - T2D risk | TSS200  |
| cg14044233 | NCOR1    | chr17 | 0.448984186 | - T2D risk | Body    |
| cg14350899 | CALD1    | chr7  | 0.449001198 | - T2D risk | Body    |
| cg17702583 | KDR      | chr4  | 0.44910862  | - T2D risk | 3'UTR   |
| cg20140023 | DNAJC1   | chr10 | 0.449218105 | - T2D risk | Body    |
| cg25867228 | TAB2     | chr6  | 0.449248876 | + T2D risk | Body    |
| cg00582562 | SKAP1    | chr17 | 0.449376118 | + T2D risk | Body    |
| cg20470716 | DDC      | chr7  | 0.449413631 | - T2D risk | Body    |
| cg10249546 | TTC28    | chr22 | 0.449546778 | - T2D risk | Body    |
| cg17010273 | DDK2     | chr4  | 0.449565068 | - T2D risk | TSS1500 |
| cg10333144 | ATP6V1H  | chr8  | 0.449566062 | + T2D risk | 3'UTR   |
| cg21236247 | KIAA0232 | chr4  | 0.449572144 | - T2D risk | 5'UTR   |
| cg10871345 | ATXN1    | chr6  | 0.449671712 | - T2D risk | 5'UTR   |
| cg13690322 | MGRN1    | chr16 | 0.449713804 | + T2D risk | Body    |
| cg00678630 | SCAF11   | chr12 | 0.449939867 | - T2D risk | TSS1500 |
| cg02131870 | CUX1     | chr7  | 0.45004036  | + T2D risk | Body    |
| cg00389397 | CDH22    | chr20 | 0.450172065 | - T2D risk | Body    |
| cg12741922 | TSC22D1  | chr13 | 0.450178291 | - T2D risk | Body    |
| cg12741922 | TSC22D1  | chr13 | 0.450178291 | - T2D risk | TSS1500 |
| cg12741922 | TSC22D1  | chr13 | 0.450178291 | - T2D risk | 5'UTR   |
| cg12741922 | TSC22D1  | chr13 | 0.450178291 | - T2D risk | TSS200  |
| cg06456315 | KDM4B    | chr19 | 0.450188808 | + T2D risk | Body    |
| cg12908660 | DDC      | chr7  | 0.45030218  | - T2D risk | Body    |
| cg00961517 | KIAA1217 | chr10 | 0.450316705 | + T2D risk | 5'UTR   |
| cg04837309 | CUX1     | chr7  | 0.450331173 | - T2D risk | Body    |
| cg23401210 | USP29    | chr19 | 0.450332549 | - T2D risk | TSS1500 |
| cg04986034 | ITGB1    | chr10 | 0.450372892 | + T2D risk | Body    |
| cg00115741 | PTPRU    | chr1  | 0.450376665 | + T2D risk | Body    |
| cg24271718 | PRKAG2   | chr7  | 0.450485309 | - T2D risk | Body    |
| cg06795712 | AGPAT3   | chr21 | 0.45052532  | + T2D risk | 5'UTR   |
| cg06795712 | AGPAT3   | chr21 | 0.45052532  | + T2D risk | TSS1500 |
| cg26199576 | SLC7A2   | chr8  | 0.45053205  | + T2D risk | TSS1500 |
| cg23523619 | LMX1B    | chr9  | 0.450745402 | + T2D risk | Body    |
| cg04136251 | ROBO2    | chr3  | 0.450813607 | - T2D risk | 5'UTR   |
| cg04136251 | ROBO2    | chr3  | 0.450813607 | - T2D risk | Body    |
| cg05640346 | CNTNAP2  | chr7  | 0.451027036 | - T2D risk | Body    |
| cg03644238 | CUL1     | chr7  | 0.451182938 | - T2D risk | 5'UTR   |
| cg16578108 | RAP1GAP2 | chr17 | 0.451199539 | - T2D risk | Body    |
| cg15085427 | ARID2    | chr12 | 0.451236537 | + T2D risk | Body    |
| cg22381955 | CHFR     | chr12 | 0.45134527  | + T2D risk | Body    |
| cg11680444 | ROBO2    | chr3  | 0.451354216 | + T2D risk | 5'UTR   |
| cg11680444 | ROBO2    | chr3  | 0.451354216 | + T2D risk | TSS200  |
| cg11680444 | ROBO2    | chr3  | 0.451354216 | + T2D risk | Body    |
| cg24703175 | NOTCH3   | chr19 | 0.451741263 | - T2D risk | Body    |
| cg14511739 | APC      | chr5  | 0.45186871  | - T2D risk | 5'UTR   |
| cg14511739 | APC      | chr5  | 0.45186871  | - T2D risk | TSS200  |
| cg14490286 | ARL15    | chr5  | 0.452140399 | + T2D risk | Body    |
| cg12986181 | TMEM150C | chr4  | 0.452158704 | - T2D risk | 5'UTR   |
| cg10439402 | TMEM131  | chr2  | 0.452225734 | + T2D risk | Body    |
| cg24322374 | PACRG    | chr6  | 0.452254232 | + T2D risk | TSS1500 |
| cg10388392 | SCAF11   | chr12 | 0.452323237 | + T2D risk | Body    |
| cg06171022 | CUX2     | chr12 | 0.452353148 | + T2D risk | Body    |
| cg14179786 | RHBDD1   | chr2  | 0.45242948  | + T2D risk | Body    |
| cg11266473 | GAD1     | chr2  | 0.452429484 | + T2D risk | 5'UTR   |
| cg12234533 | ULK4     | chr3  | 0.452437346 | + T2D risk | 5'UTR   |
| cg15811446 | WWP2     | chr16 | 0.452519321 | + T2D risk | Body    |
| cg12042923 | SPOCK1   | chr5  | 0.452842553 | - T2D risk | Body    |
| cg12610595 | WDR47    | chr1  | 0.452984609 | - T2D risk | 5'UTR   |
| cg12610595 | WDR47    | chr1  | 0.452984609 | - T2D risk | 1stExon |
| cg20058937 | SLC29A4  | chr7  | 0.453006462 | + T2D risk | Body    |
| cg19239007 | KDM4B    | chr19 | 0.453006506 | - T2D risk | 5'UTR   |
| cg03450124 | CUX1     | chr7  | 0.453118424 | + T2D risk | Body    |
| cg12724894 | DIP2C    | chr10 | 0.453217771 | + T2D risk | Body    |
| cg27352871 | TSC22D1  | chr13 | 0.453241881 | + T2D risk | TSS1500 |
| cg27352871 | TSC22D1  | chr13 | 0.453241881 | + T2D risk | 5'UTR   |
| cg27352871 | TSC22D1  | chr13 | 0.453241881 | + T2D risk | Body    |
| cg05616959 | ERC2     | chr3  | 0.453339707 | - T2D risk | Body    |



|               |          |       |             |            |         |
|---------------|----------|-------|-------------|------------|---------|
| cg05287944    | PRKACB   | chr1  | 0.45335178  | - T2D risk | Body    |
| cg01123126    | AGPAT3   | chr21 | 0.453518037 | + T2D risk | 5'UTR   |
| cg09397542    | PHACTR1  | chr6  | 0.453586894 | - T2D risk | 5'UTR   |
| cg09041037    | CLEC16A  | chr16 | 0.453590858 | - T2D risk | Body    |
| cg25350411    | PLAGL1   | chr6  | 0.453658337 | - T2D risk | 5'UTR   |
| cg10169887    | PHF21A   | chr11 | 0.453758224 | - T2D risk | 3'UTR   |
| cg23030397    | CHFR     | chr12 | 0.45376305  | + T2D risk | 3'UTR   |
| cg12829831    | TPCN1    | chr12 | 0.45380164  | - T2D risk | 5'UTR   |
| cg12510170    | CUX1     | chr7  | 0.45396691  | - T2D risk | 3'UTR   |
| cg12510170    | CUX1     | chr7  | 0.45396691  | - T2D risk | Body    |
| cg09896544    | MEIS2    | chr15 | 0.454053886 | + T2D risk | Body    |
| cg25531074    | CLASP2   | chr3  | 0.454137285 | - T2D risk | Body    |
| cg26743518    | SSBP2    | chr5  | 0.454311684 | + T2D risk | Body    |
| cg16488105    | FBXL2    | chr3  | 0.454321491 | - T2D risk | ExonBnd |
| cg16488105    | FBXL2    | chr3  | 0.454321491 | - T2D risk | Body    |
| cg22781236    | UBL3     | chr13 | 0.454354177 | + T2D risk | 1stExon |
| cg22781236    | UBL3     | chr13 | 0.454354177 | + T2D risk | 5'UTR   |
| cg19341715    | DIP2C    | chr10 | 0.454360511 | - T2D risk | Body    |
| cg10568297    | SLC29A4  | chr7  | 0.45447283  | - T2D risk | TSS1500 |
| cg14204784    | LMX1B    | chr9  | 0.454586199 | - T2D risk | Body    |
| cg09616189    | CNTNAP2  | chr7  | 0.454674052 | - T2D risk | Body    |
| cg13971546    | RANBP17  | chr5  | 0.454756364 | + T2D risk | Body    |
| cg03093944    | RAP1GAP2 | chr17 | 0.454784919 | - T2D risk | Body    |
| cg05005422    | CUX1     | chr7  | 0.455090729 | + T2D risk | Body    |
| cg02833367    | PTP4A2   | chr1  | 0.455157899 | + T2D risk | 5'UTR   |
| cg20254168    | NDUFB3   | chr2  | 0.455173872 | + T2D risk | Body    |
| cg01363095    | DIP2C    | chr10 | 0.455197421 | + T2D risk | Body    |
| cg13650660    | RHOQ     | chr2  | 0.455302354 | - T2D risk | Body    |
| cg15636860    | ARL15    | chr5  | 0.455323028 | + T2D risk | Body    |
| cg21297695    | PRKAG2   | chr7  | 0.455336241 | - T2D risk | Body    |
| cg01709568    | APBA1    | chr9  | 0.455341666 | - T2D risk | 5'UTR   |
| cg21017748    | FNIP2    | chr4  | 0.4553878   | - T2D risk | Body    |
| cg00849183    | SLIT3    | chr5  | 0.455467342 | - T2D risk | 1stExon |
| cg00849183    | SLIT3    | chr5  | 0.455467342 | - T2D risk | 5'UTR   |
| cg13859346    | DIP2C    | chr10 | 0.455553368 | - T2D risk | Body    |
| cg12783346    | FBXO11   | chr2  | 0.455631777 | - T2D risk | 5'UTR   |
| cg19080559    | PFKFB2   | chr1  | 0.455646001 | + T2D risk | Body    |
| cg18068637    | SLIT3    | chr5  | 0.455688072 | - T2D risk | Body    |
| cg05894754    | UNC80    | chr2  | 0.455710123 | + T2D risk | Body    |
| cg25134747    | SEMA3G   | chr3  | 0.455711237 | + T2D risk | TSS1500 |
| cg03807878    | PRKCB    | chr16 | 0.455729214 | + T2D risk | Body    |
| ch.7.2186304R | CUX1     | chr7  | 0.45573774  | + T2D risk | Body    |
| cg02256034    | NCOA2    | chr8  | 0.455787827 | - T2D risk | 5'UTR   |
| cg15581007    | ARL15    | chr5  | 0.455790632 | - T2D risk | Body    |
| cg09024023    | PHF21A   | chr11 | 0.455904163 | - T2D risk | Body    |
| cg23587257    | MYO6     | chr6  | 0.4559304   | + T2D risk | Body    |
| cg16865970    | PRKCE    | chr2  | 0.456028987 | + T2D risk | Body    |
| cg01753920    | NGLY1    | chr3  | 0.456036504 | + T2D risk | Body    |
| cg15623573    | APBA1    | chr9  | 0.456090405 | - T2D risk | TSS1500 |
| cg14355023    | CNTNAP2  | chr7  | 0.456140065 | - T2D risk | Body    |
| cg02071811    | ANK3     | chr10 | 0.456170994 | + T2D risk | Body    |
| cg04931788    | RAP1GAP2 | chr17 | 0.456263109 | + T2D risk | 3'UTR   |
| cg04761352    | TAB2     | chr6  | 0.456321236 | - T2D risk | Body    |
| cg02399469    | USP29    | chr19 | 0.456341666 | + T2D risk | TSS1500 |
| cg03479012    | ANKHD1   | chr5  | 0.456417473 | + T2D risk | Body    |
| cg07458272    | KIAA0355 | chr19 | 0.45650449  | + T2D risk | TSS1500 |
| cg07102380    | DIP2C    | chr10 | 0.456516593 | - T2D risk | Body    |
| cg23716866    | CLIC5    | chr6  | 0.456661904 | - T2D risk | TSS1500 |
| cg07012178    | PRKAG2   | chr7  | 0.456691586 | + T2D risk | Body    |
| cg26088614    | ASXL2    | chr2  | 0.456892616 | - T2D risk | Body    |
| cg04946603    | DLL4     | chr15 | 0.456936485 | + T2D risk | TSS200  |
| cg02002807    | BCAT1    | chr12 | 0.457015843 | + T2D risk | Body    |
| cg27291602    | DIP2C    | chr10 | 0.457121667 | - T2D risk | Body    |
| cg21232015    | CHFR     | chr12 | 0.457141236 | - T2D risk | Body    |
| cg06626556    | ULK4     | chr3  | 0.457187498 | - T2D risk | 3'UTR   |
| cg20595215    | LMCD1    | chr3  | 0.457286355 | + T2D risk | TSS1500 |
| cg26745402    | DYNC111  | chr7  | 0.457294719 | - T2D risk | 5'UTR   |
| cg25097167    | TENM2    | chr5  | 0.457498114 | - T2D risk | Body    |
| cg05735395    | CUX1     | chr7  | 0.457551708 | - T2D risk | Body    |
| cg08507393    | DNAH9    | chr17 | 0.45762687  | - T2D risk | Body    |



|            |          |       |             |            |         |
|------------|----------|-------|-------------|------------|---------|
| cg05845767 | CDH22    | chr20 | 0.45763671  | + T2D risk | 5'UTR   |
| cg25034557 | PACS1    | chr11 | 0.45767692  | - T2D risk | Body    |
| cg27186420 | WWP2     | chr16 | 0.45767836  | - T2D risk | 3'UTR   |
| cg22323421 | NCOA7    | chr6  | 0.457685049 | - T2D risk | Body    |
| cg27274947 | FBXL2    | chr3  | 0.457814737 | + T2D risk | Body    |
| cg04218418 | DDHD2    | chr8  | 0.457963242 | + T2D risk | TSS1500 |
| cg04218418 | DDHD2    | chr8  | 0.457963242 | + T2D risk | TSS200  |
| cg03643116 | MAST1    | chr19 | 0.458116438 | + T2D risk | Body    |
| cg11988872 | AGPAT3   | chr21 | 0.458175748 | + T2D risk | 5'UTR   |
| cg13632208 | ACSS2    | chr20 | 0.458255959 | + T2D risk | Body    |
| cg06918623 | PRKAG2   | chr7  | 0.458406641 | + T2D risk | Body    |
| cg20789595 | ADCY5    | chr3  | 0.458459363 | + T2D risk | Body    |
| cg12136731 | PDE3A    | chr12 | 0.458642152 | + T2D risk | Body    |
| cg15912031 | DIP2C    | chr10 | 0.458673746 | + T2D risk | Body    |
| cg12141724 | RAP1GAP2 | chr17 | 0.458971374 | + T2D risk | Body    |
| cg02986924 | RTN4     | chr2  | 0.459087709 | - T2D risk | 3'UTR   |
| cg17553760 | PRKCB    | chr16 | 0.459089727 | + T2D risk | Body    |
| cg17230540 | KCNJ18   | chr17 | 0.459098779 | + T2D risk | TSS200  |
| cg17230540 | KCNJ12   | chr17 | 0.459098779 | + T2D risk | 5'UTR   |
| cg22323716 | RHBDD1   | chr2  | 0.459157137 | - T2D risk | Body    |
| cg20972917 | PRKAG2   | chr7  | 0.459157247 | + T2D risk | TSS1500 |
| cg20972917 | PRKAG2   | chr7  | 0.459157247 | + T2D risk | Body    |
| cg22616512 | CUX1     | chr7  | 0.459186978 | + T2D risk | Body    |
| cg05926955 | ROBO2    | chr3  | 0.459292955 | - T2D risk | 5'UTR   |
| cg05926955 | ROBO2    | chr3  | 0.459292955 | - T2D risk | Body    |
| cg13607311 | PLAGL1   | chr6  | 0.459354856 | + T2D risk | 3'UTR   |
| cg15643574 | PICALM   | chr11 | 0.45939261  | - T2D risk | Body    |
| cg17984397 | TAB2     | chr6  | 0.459558753 | - T2D risk | 5'UTR   |
| cg17984397 | TAB2     | chr6  | 0.459558753 | - T2D risk | Body    |
| cg17984397 | TAB2     | chr6  | 0.459558753 | - T2D risk | 1stExon |
| cg24556130 | ASH1L    | chr1  | 0.459559785 | + T2D risk | Body    |
| cg07430325 | CMTR1    | chr6  | 0.459765502 | - T2D risk | Body    |
| cg24067911 | ATXN1    | chr6  | 0.459774896 | + T2D risk | 5'UTR   |
| cg08730885 | CNTNAP2  | chr7  | 0.459803966 | + T2D risk | Body    |
| cg10881773 | DYNC111  | chr7  | 0.459848489 | - T2D risk | 3'UTR   |
| cg13258535 | ZHX2     | chr8  | 0.459899918 | - T2D risk | 5'UTR   |
| cg11905876 | ITGA1    | chr5  | 0.459915066 | + T2D risk | Body    |
| cg13411037 | ATP6V1H  | chr8  | 0.45998041  | - T2D risk | Body    |
| cg03978682 | ARL15    | chr5  | 0.460033473 | - T2D risk | Body    |
| cg17280975 | ZHX2     | chr8  | 0.460065613 | + T2D risk | 5'UTR   |
| cg21660300 | RNF217   | chr6  | 0.460087345 | + T2D risk | TSS1500 |
| cg06790566 | CDH22    | chr20 | 0.460088345 | + T2D risk | 5'UTR   |
| cg09330153 | KIAA1217 | chr10 | 0.460117626 | + T2D risk | TSS1500 |
| cg01698343 | ERC2     | chr3  | 0.460125202 | + T2D risk | Body    |
| cg24400939 | CUX1     | chr7  | 0.460182538 | - T2D risk | 3'UTR   |
| cg24400939 | CUX1     | chr7  | 0.460182538 | - T2D risk | Body    |
| cg08461746 | KCNIP3   | chr2  | 0.460224037 | + T2D risk | Body    |
| cg15331609 | ATP8A2   | chr13 | 0.46057867  | - T2D risk | Body    |
| cg07029759 | ANK2     | chr4  | 0.460719944 | + T2D risk | Body    |
| cg17903450 | SCGN     | chr6  | 0.460721926 | - T2D risk | TSS200  |
| cg21617644 | PPFIBP1  | chr12 | 0.460742383 | + T2D risk | 5'UTR   |
| cg01956420 | COL4A1   | chr13 | 0.460781535 | - T2D risk | TSS200  |
| cg14958217 | TOX3     | chr16 | 0.460800738 | + T2D risk | 1stExon |
| cg14958217 | TOX3     | chr16 | 0.460800738 | + T2D risk | 5'UTR   |
| cg14958217 | TOX3     | chr16 | 0.460800738 | + T2D risk | TSS1500 |
| cg17861764 | PICALM   | chr11 | 0.460855364 | + T2D risk | Body    |
| cg01026025 | DENND4C  | chr9  | 0.461044864 | - T2D risk | Body    |
| cg18359782 | CUX1     | chr7  | 0.46113651  | + T2D risk | Body    |
| cg00071658 | DACH1    | chr13 | 0.461198609 | + T2D risk | Body    |
| cg26405880 | PRKAG2   | chr7  | 0.461231503 | - T2D risk | Body    |
| cg24418589 | TTC28    | chr22 | 0.461341295 | - T2D risk | Body    |
| cg27424108 | NCOA2    | chr8  | 0.461349441 | - T2D risk | 5'UTR   |
| cg26873115 | CREBBP   | chr16 | 0.461443437 | - T2D risk | Body    |
| cg07005078 | LAP3     | chr4  | 0.461700122 | + T2D risk | TSS1500 |
| cg04723544 | ACTN4    | chr19 | 0.461713508 | + T2D risk | Body    |
| cg22201778 | CUX1     | chr7  | 0.461740743 | - T2D risk | TSS1500 |
| cg22201778 | CUX1     | chr7  | 0.461740743 | - T2D risk | TSS200  |
| cg07325360 | NGLY1    | chr3  | 0.46178045  | + T2D risk | Body    |
| cg04466134 | RSF1     | chr11 | 0.461788593 | + T2D risk | Body    |
| cg06026769 | PDE3A    | chr12 | 0.461794548 | - T2D risk | Body    |



|            |          |       |             |            |         |
|------------|----------|-------|-------------|------------|---------|
| cg07638320 | CRYL1    | chr13 | 0.461807816 | - T2D risk | Body    |
| cg10298313 | PDE7A    | chr8  | 0.461830743 | + T2D risk | Body    |
| cg26247937 | PRKCE    | chr2  | 0.4618836   | - T2D risk | Body    |
| cg08341316 | DKK2     | chr4  | 0.461890328 | - T2D risk | 1stExon |
| cg08341316 | DKK2     | chr4  | 0.461890328 | - T2D risk | 5'UTR   |
| cg19377719 | TAB2     | chr6  | 0.461920114 | - T2D risk | Body    |
| cg02218809 | TMEM219  | chr16 | 0.46192693  | - T2D risk | TSS200  |
| cg08935703 | ATRNL1   | chr10 | 0.461957668 | + T2D risk | Body    |
| cg05381383 | PPP1R12A | chr12 | 0.46223289  | + T2D risk | Body    |
| cg05381383 | PPP1R12A | chr12 | 0.46223289  | + T2D risk | TSS1500 |
| cg05301102 | STX6     | chr1  | 0.462449682 | - T2D risk | TSS200  |
| cg02678496 | PACS1    | chr11 | 0.462492715 | - T2D risk | Body    |
| cg05481041 | TSHZ1    | chr18 | 0.462604431 | + T2D risk | TSS200  |
| cg10699496 | ADCY5    | chr3  | 0.462677174 | - T2D risk | Body    |
| cg02197034 | ITGA1    | chr5  | 0.462749277 | - T2D risk | Body    |
| cg08975507 | PRKCB    | chr16 | 0.462839293 | + T2D risk | Body    |
| cg04130572 | JPH2     | chr20 | 0.462915087 | + T2D risk | Body    |
| cg04130572 | JPH2     | chr20 | 0.462915087 | + T2D risk | 3'UTR   |
| cg15994971 | PRKCE    | chr2  | 0.462940208 | - T2D risk | Body    |
| cg15630459 | CPLX2    | chr5  | 0.462974558 | + T2D risk | TSS1500 |
| cg22637244 | BCAT1    | chr12 | 0.462983222 | - T2D risk | Body    |
| cg22637244 | BCAT1    | chr12 | 0.462983222 | - T2D risk | TSS1500 |
| cg18454630 | POC1B    | chr12 | 0.4632317   | + T2D risk | Body    |
| cg01072202 | RSF1     | chr11 | 0.463253653 | - T2D risk | Body    |
| cg21085921 | LAMA4    | chr6  | 0.463310362 | - T2D risk | Body    |
| cg25131582 | TSC22D1  | chr13 | 0.463393415 | - T2D risk | TSS1500 |
| cg25131582 | TSC22D1  | chr13 | 0.463393415 | - T2D risk | 5'UTR   |
| cg25131582 | TSC22D1  | chr13 | 0.463393415 | - T2D risk | Body    |
| cg17409514 | GLG1     | chr16 | 0.463403764 | - T2D risk | Body    |
| cg09449988 | PRKAG2   | chr7  | 0.463928366 | + T2D risk | Body    |
| cg07661636 | APC      | chr5  | 0.463955233 | + T2D risk | TSS1500 |
| cg14455196 | LAMA4    | chr6  | 0.463957434 | - T2D risk | Body    |
| cg26612230 | PDLIM5   | chr4  | 0.464039396 | + T2D risk | 3'UTR   |
| cg26612230 | PDLIM5   | chr4  | 0.464039396 | + T2D risk | Body    |
| cg11877325 | KIAA1217 | chr10 | 0.464045505 | - T2D risk | Body    |
| cg17170812 | TENM2    | chr5  | 0.464098805 | + T2D risk | Body    |
| cg17964750 | TENM2    | chr5  | 0.464147698 | + T2D risk | Body    |
| cg15301006 | CPLX2    | chr5  | 0.464221257 | + T2D risk | 5'UTR   |
| cg12093930 | IMPA1    | chr8  | 0.464268847 | - T2D risk | TSS200  |
| cg24756864 | NPEPPS   | chr17 | 0.464302942 | + T2D risk | Body    |
| cg13603028 | CHKA     | chr11 | 0.464327904 | - T2D risk | Body    |
| cg19846314 | GAD1     | chr2  | 0.464446781 | + T2D risk | Body    |
| cg12105873 | MEIS2    | chr15 | 0.464478046 | + T2D risk | Body    |
| cg01830256 | PACS2    | chr14 | 0.464588593 | - T2D risk | 3'UTR   |
| cg13443733 | RAP1GAP2 | chr17 | 0.464594159 | + T2D risk | TSS200  |
| cg12158124 | INPP4A   | chr2  | 0.464606321 | + T2D risk | 5'UTR   |
| cg19465823 | ASH1L    | chr1  | 0.464644857 | + T2D risk | ExonBnd |
| cg19465823 | ASH1L    | chr1  | 0.464644857 | + T2D risk | Body    |
| cg02826729 | SSB      | chr2  | 0.464815706 | + T2D risk | Body    |
| cg04888638 | CRYL1    | chr13 | 0.464923429 | - T2D risk | TSS1500 |
| cg15788533 | UXS1     | chr2  | 0.465000268 | - T2D risk | Body    |
| cg13801307 | DIP2C    | chr10 | 0.465006379 | + T2D risk | Body    |
| cg14511575 | RAP2A    | chr13 | 0.465024778 | - T2D risk | Body    |
| cg22650104 | FAM155B  | chrX  | 0.465120909 | - T2D risk | Body    |
| cg11535486 | MMS19    | chr10 | 0.46519007  | + T2D risk | TSS200  |
| cg16697996 | ERC2     | chr3  | 0.465284761 | - T2D risk | 3'UTR   |
| cg24016360 | PACS2    | chr14 | 0.465304342 | + T2D risk | Body    |
| cg22471931 | WWP2     | chr16 | 0.46536224  | + T2D risk | TSS200  |
| cg22471931 | WWP2     | chr16 | 0.46536224  | + T2D risk | Body    |
| cg27056599 | KCNJ12   | chr17 | 0.465382093 | - T2D risk | TSS200  |
| cg14023804 | ARID2    | chr12 | 0.465422914 | - T2D risk | Body    |
| cg14023804 | ARID2    | chr12 | 0.465422914 | - T2D risk | ExonBnd |
| cg25786436 | PRKAG2   | chr7  | 0.465430283 | - T2D risk | 5'UTR   |
| cg25786436 | PRKAG2   | chr7  | 0.465430283 | - T2D risk | 1stExon |
| cg05549834 | DIP2C    | chr10 | 0.465449283 | + T2D risk | Body    |
| cg10949072 | FAM160A1 | chr4  | 0.465489551 | - T2D risk | Body    |
| cg15155559 | ULK4     | chr3  | 0.465701394 | - T2D risk | Body    |
| cg17352023 | CUX2     | chr12 | 0.465798978 | - T2D risk | Body    |
| cg18671654 | NCOA2    | chr8  | 0.46581486  | + T2D risk | Body    |
| cg19637634 | MEIS2    | chr15 | 0.465884908 | + T2D risk | Body    |



|            |          |       |             |            |         |
|------------|----------|-------|-------------|------------|---------|
| cg23160224 | SLIT3    | chr5  | 0.465968536 | - T2D risk | Body    |
| cg18523183 | SPAG9    | chr17 | 0.465984963 | - T2D risk | Body    |
| cg16391727 | PRKAG2   | chr7  | 0.465988809 | - T2D risk | Body    |
| cg23392763 | ATP2B1   | chr12 | 0.4661618   | - T2D risk | Body    |
| cg23686983 | CUX1     | chr7  | 0.466267637 | + T2D risk | Body    |
| cg15979225 | ACSS2    | chr20 | 0.466329508 | + T2D risk | Body    |
| cg06674286 | PTP4A2   | chr1  | 0.46635644  | - T2D risk | 5'UTR   |
| cg06674286 | PTP4A2   | chr1  | 0.46635644  | - T2D risk | 1stExon |
| cg04223924 | TMEM131  | chr2  | 0.466371464 | - T2D risk | Body    |
| cg02947996 | CPLX2    | chr5  | 0.466499901 | - T2D risk | 5'UTR   |
| cg07795968 | JPH2     | chr20 | 0.466561313 | + T2D risk | TSS1500 |
| cg10078482 | ST6GAL1  | chr3  | 0.466566642 | - T2D risk | Body    |
| cg10078482 | ST6GAL1  | chr3  | 0.466566642 | - T2D risk | 5'UTR   |
| cg01498219 | GNA12    | chr7  | 0.466587033 | - T2D risk | Body    |
| cg05567269 | TJP1     | chr15 | 0.466655006 | - T2D risk | Body    |
| cg00761363 | EVI5     | chr1  | 0.466705738 | + T2D risk | Body    |
| cg12867150 | PTPRU    | chr1  | 0.466736087 | + T2D risk | Body    |
| cg06097537 | NCOA7    | chr6  | 0.466926765 | + T2D risk | Body    |
| cg11799301 | ATP8A2   | chr13 | 0.466938897 | - T2D risk | Body    |
| cg26726310 | ASXL2    | chr2  | 0.466982408 | + T2D risk | Body    |
| cg13057030 | CUX2     | chr12 | 0.467093397 | + T2D risk | Body    |
| cg18874483 | DIP2C    | chr10 | 0.467150046 | - T2D risk | Body    |
| cg09132185 | KIAA1217 | chr10 | 0.467505499 | - T2D risk | 5'UTR   |
| cg14822228 | PACS1    | chr11 | 0.467580262 | + T2D risk | Body    |
| cg09688713 | ASH1L    | chr1  | 0.467582218 | + T2D risk | ExonBnd |
| cg09688713 | ASH1L    | chr1  | 0.467582218 | + T2D risk | Body    |
| cg18120999 | TENM2    | chr5  | 0.468252743 | + T2D risk | Body    |
| cg10587299 | NUP98    | chr11 | 0.468571161 | + T2D risk | Body    |
| cg03769116 | KIAA0355 | chr19 | 0.468581156 | + T2D risk | Body    |
| cg15795705 | SLIT3    | chr5  | 0.468682944 | + T2D risk | Body    |
| cg07956003 | DYNC111  | chr7  | 0.468862659 | + T2D risk | 5'UTR   |
| cg14591730 | PACS1    | chr11 | 0.468961978 | - T2D risk | Body    |
| cg16395205 | CREBBP   | chr16 | 0.469329626 | + T2D risk | Body    |
| cg26311782 | DIP2C    | chr10 | 0.469383    | + T2D risk | Body    |
| cg13370754 | SSBP2    | chr5  | 0.46953302  | + T2D risk | Body    |
| cg02544394 | PRKCE    | chr2  | 0.469540132 | + T2D risk | TSS1500 |
| cg19900501 | KIAA0355 | chr19 | 0.469658076 | + T2D risk | TSS1500 |
| cg08774817 | CNTNAP2  | chr7  | 0.469737751 | - T2D risk | Body    |
| cg14999189 | RAP1GAP2 | chr17 | 0.469947716 | + T2D risk | Body    |
| cg00038681 | ROBO2    | chr3  | 0.469957608 | + T2D risk | 5'UTR   |
| cg00038681 | ROBO2    | chr3  | 0.469957608 | + T2D risk | Body    |
| cg06067493 | ATP6V1H  | chr8  | 0.470063202 | - T2D risk | 5'UTR   |
| cg06067493 | ATP6V1H  | chr8  | 0.470063202 | - T2D risk | TSS200  |
| cg06067493 | ATP6V1H  | chr8  | 0.470063202 | - T2D risk | 1stExon |
| cg27395226 | SRPK2    | chr7  | 0.470111974 | - T2D risk | Body    |
| cg23344412 | SUB1     | chr5  | 0.470121519 | - T2D risk | 3'UTR   |
| cg15769565 | FNIP2    | chr4  | 0.470157821 | + T2D risk | Body    |
| cg19457556 | ANK3     | chr10 | 0.470224202 | + T2D risk | TSS1500 |
| cg06640374 | PFKFB2   | chr1  | 0.470225906 | + T2D risk | Body    |
| cg06640374 | PFKFB2   | chr1  | 0.470225906 | + T2D risk | 3'UTR   |
| cg07814338 | KIAA0355 | chr19 | 0.470273031 | - T2D risk | 5'UTR   |
| cg01494454 | BCAT1    | chr12 | 0.470430502 | - T2D risk | Body    |
| cg17510725 | PRKACB   | chr1  | 0.470486539 | - T2D risk | Body    |
| cg17510725 | PRKACB   | chr1  | 0.470486539 | - T2D risk | TSS1500 |
| cg13588073 | PRKAG2   | chr7  | 0.470553709 | + T2D risk | TSS1500 |
| cg13588073 | PRKAG2   | chr7  | 0.470553709 | + T2D risk | Body    |
| cg04946715 | SSB      | chr2  | 0.470648675 | - T2D risk | 5'UTR   |
| cg11588566 | DIP2C    | chr10 | 0.470741812 | + T2D risk | Body    |
| cg24437943 | DNAJC13  | chr3  | 0.470789593 | + T2D risk | 5'UTR   |
| cg24346177 | SEZ6L    | chr22 | 0.470816347 | + T2D risk | Body    |
| cg17767263 | TJP1     | chr15 | 0.47091715  | - T2D risk | Body    |
| cg17521327 | LAP3     | chr4  | 0.47097975  | - T2D risk | TSS1500 |
| cg15941945 | KCNJ12   | chr17 | 0.471033039 | + T2D risk | Body    |
| cg12400336 | TJP1     | chr15 | 0.471089092 | + T2D risk | TSS200  |
| cg15605257 | SRPK2    | chr7  | 0.471127317 | - T2D risk | Body    |
| cg22526226 | ARID2    | chr12 | 0.4711308   | + T2D risk | Body    |
| cg17752374 | NCOR1    | chr17 | 0.471171144 | - T2D risk | Body    |
| cg26700932 | MGRN1    | chr16 | 0.471186169 | + T2D risk | Body    |
| cg25149423 | CLEC16A  | chr16 | 0.47121926  | - T2D risk | Body    |
| cg12778065 | COL4A1   | chr13 | 0.471352659 | + T2D risk | Body    |



|            |                 |       |             |            |         |
|------------|-----------------|-------|-------------|------------|---------|
| cg08256027 | <i>PLAGL1</i>   | chr6  | 0.471438678 | - T2D risk | 5'UTR   |
| cg14621885 | <i>UBE2K</i>    | chr4  | 0.471506269 | - T2D risk | Body    |
| cg07279321 | <i>PHACTR1</i>  | chr6  | 0.471753388 | - T2D risk | TSS200  |
| cg08602281 | <i>NUP98</i>    | chr11 | 0.471769642 | + T2D risk | Body    |
| cg11415826 | <i>ANK3</i>     | chr10 | 0.471813236 | + T2D risk | Body    |
| cg05557932 | <i>CREBBP</i>   | chr16 | 0.471954419 | - T2D risk | Body    |
| cg12402064 | <i>MAN1A1</i>   | chr6  | 0.471969821 | + T2D risk | Body    |
| cg27428799 | <i>ANKHD1</i>   | chr5  | 0.472047069 | - T2D risk | Body    |
| cg12864601 | <i>CADM1</i>    | chr11 | 0.472063788 | - T2D risk | Body    |
| cg16908223 | <i>PTPRU</i>    | chr1  | 0.472292124 | - T2D risk | Body    |
| cg11076544 | <i>MGRN1</i>    | chr16 | 0.472433332 | + T2D risk | Body    |
| cg05324894 | <i>PACS2</i>    | chr14 | 0.472475353 | - T2D risk | Body    |
| cg07051110 | <i>PRKCB</i>    | chr16 | 0.472513682 | - T2D risk | Body    |
| cg14889690 | <i>DNAJC1</i>   | chr10 | 0.472684321 | - T2D risk | Body    |
| cg24687579 | <i>CUX1</i>     | chr7  | 0.472780647 | - T2D risk | Body    |
| cg17613241 | <i>TENM2</i>    | chr5  | 0.472811125 | - T2D risk | Body    |
| cg17534070 | <i>SLIT3</i>    | chr5  | 0.472953619 | + T2D risk | Body    |
| cg11890278 | <i>NOL4</i>     | chr18 | 0.473090676 | + T2D risk | 5'UTR   |
| cg11890278 | <i>NOL4</i>     | chr18 | 0.473090676 | + T2D risk | Body    |
| cg00844078 | <i>ASXL2</i>    | chr2  | 0.473132191 | + T2D risk | Body    |
| cg15977864 | <i>BCAT1</i>    | chr12 | 0.473178886 | - T2D risk | Body    |
| cg12949530 | <i>DIP2C</i>    | chr10 | 0.473327499 | + T2D risk | Body    |
| cg08035942 | <i>TSHZ1</i>    | chr18 | 0.473338493 | - T2D risk | TSS1500 |
| cg16585570 | <i>SSBP2</i>    | chr5  | 0.473387527 | + T2D risk | Body    |
| cg12368246 | <i>PLAGL1</i>   | chr6  | 0.473459426 | + T2D risk | 5'UTR   |
| cg03106584 | <i>ATP6V1A</i>  | chr3  | 0.473491602 | - T2D risk | Body    |
| cg14336545 | <i>ATP8A2</i>   | chr13 | 0.473513202 | - T2D risk | ExonBnd |
| cg14336545 | <i>ATP8A2</i>   | chr13 | 0.473513202 | - T2D risk | Body    |
| cg04232541 | <i>PLAGL1</i>   | chr6  | 0.473785447 | - T2D risk | 5'UTR   |
| cg13302994 | <i>UNC80</i>    | chr2  | 0.473816818 | + T2D risk | Body    |
| cg19952762 | <i>KDR</i>      | chr4  | 0.47385862  | - T2D risk | 3'UTR   |
| cg11591441 | <i>SKAP1</i>    | chr17 | 0.473876146 | - T2D risk | Body    |
| cg13246407 | <i>SNX4</i>     | chr3  | 0.473951327 | - T2D risk | Body    |
| cg11198912 | <i>DIP2C</i>    | chr10 | 0.473954394 | - T2D risk | Body    |
| cg24482293 | <i>RHOQ</i>     | chr2  | 0.473966459 | + T2D risk | ExonBnd |
| cg24482293 | <i>RHOQ</i>     | chr2  | 0.473966459 | + T2D risk | Body    |
| cg02642914 | <i>CADM1</i>    | chr11 | 0.474067115 | - T2D risk | Body    |
| cg08645720 | <i>LCA5</i>     | chr6  | 0.474068171 | - T2D risk | TSS200  |
| cg15208525 | <i>CNTNAP2</i>  | chr7  | 0.474098858 | - T2D risk | Body    |
| cg05869122 | <i>ITPKB</i>    | chr1  | 0.47434092  | - T2D risk | TSS200  |
| cg15323881 | <i>YWHAQ</i>    | chr2  | 0.474479416 | - T2D risk | Body    |
| cg08724310 | <i>BCAT1</i>    | chr12 | 0.474539504 | + T2D risk | Body    |
| cg01088474 | <i>NCOA2</i>    | chr8  | 0.474551262 | + T2D risk | 5'UTR   |
| cg20091786 | <i>PRKAG2</i>   | chr7  | 0.474588678 | - T2D risk | Body    |
| cg07778064 | <i>ASXL2</i>    | chr2  | 0.47493927  | + T2D risk | Body    |
| cg17790273 | <i>SPAG9</i>    | chr17 | 0.475187397 | - T2D risk | 3'UTR   |
| cg10043753 | <i>CADM1</i>    | chr11 | 0.475354999 | + T2D risk | Body    |
| cg08738901 | <i>LAMA4</i>    | chr6  | 0.475395628 | + T2D risk | Body    |
| cg02386665 | <i>ARL15</i>    | chr5  | 0.475397015 | - T2D risk | Body    |
| cg23419050 | <i>NOL4</i>     | chr18 | 0.475460642 | - T2D risk | Body    |
| cg23419050 | <i>NOL4</i>     | chr18 | 0.475460642 | - T2D risk | TSS200  |
| cg27058898 | <i>ASXL2</i>    | chr2  | 0.475482667 | + T2D risk | Body    |
| cg25242003 | <i>ANKHD1</i>   | chr5  | 0.475483046 | - T2D risk | TSS1500 |
| cg24347998 | <i>WWP2</i>     | chr16 | 0.475601414 | + T2D risk | Body    |
| cg09949366 | <i>PHACTR1</i>  | chr6  | 0.475709605 | + T2D risk | Body    |
| cg20073327 | <i>KIAA0355</i> | chr19 | 0.475771479 | + T2D risk | Body    |
| cg07411420 | <i>ERC2</i>     | chr3  | 0.475826239 | - T2D risk | 5'UTR   |
| cg02374934 | <i>DLL4</i>     | chr15 | 0.475849414 | + T2D risk | Body    |
| cg02521050 | <i>AGPAT3</i>   | chr21 | 0.475948844 | + T2D risk | 5'UTR   |
| cg06222774 | <i>PDE7A</i>    | chr8  | 0.475972453 | - T2D risk | Body    |
| cg18735405 | <i>TENM2</i>    | chr5  | 0.476021383 | + T2D risk | Body    |
| cg14275148 | <i>FBXO11</i>   | chr2  | 0.476050612 | - T2D risk | Body    |
| cg20222988 | <i>TENM2</i>    | chr5  | 0.476054754 | + T2D risk | Body    |
| cg15922394 | <i>NF1</i>      | chr17 | 0.476144608 | + T2D risk | TSS1500 |
| cg05273887 | <i>KREMEN1</i>  | chr22 | 0.476148592 | - T2D risk | Body    |
| cg08322834 | <i>PRKCB</i>    | chr16 | 0.476183379 | + T2D risk | Body    |
| cg24368203 | <i>ROBO2</i>    | chr3  | 0.476196995 | + T2D risk | Body    |
| cg18598642 | <i>FAM160A1</i> | chr4  | 0.476296708 | - T2D risk | Body    |
| cg17187023 | <i>SKAP1</i>    | chr17 | 0.476364086 | - T2D risk | Body    |
| cg21536815 | <i>FBXO11</i>   | chr2  | 0.476395178 | + T2D risk | 5'UTR   |



|            |          |       |             |            |         |
|------------|----------|-------|-------------|------------|---------|
| cg00496868 | ACTN4    | chr19 | 0.476416735 | - T2D risk | Body    |
| cg26878006 | ANK3     | chr10 | 0.476573519 | - T2D risk | Body    |
| cg20855617 | CNTNAP2  | chr7  | 0.476604855 | + T2D risk | Body    |
| cg24203529 | ASXL2    | chr2  | 0.476617887 | - T2D risk | Body    |
| cg06428023 | ROBO2    | chr3  | 0.476749717 | - T2D risk | 5'UTR   |
| cg06428023 | ROBO2    | chr3  | 0.476749717 | - T2D risk | Body    |
| cg19798199 | DDHD2    | chr8  | 0.476799246 | - T2D risk | 5'UTR   |
| cg19798199 | DDHD2    | chr8  | 0.476799246 | - T2D risk | ExonBnd |
| cg18669040 | FBXL2    | chr3  | 0.476989566 | + T2D risk | Body    |
| cg16468910 | SNX4     | chr3  | 0.477039817 | - T2D risk | Body    |
| cg08037152 | PRKAG2   | chr7  | 0.477215958 | + T2D risk | Body    |
| cg13599258 | CUX2     | chr12 | 0.477324493 | + T2D risk | Body    |
| cg04743919 | PPP1R12A | chr12 | 0.477338973 | - T2D risk | Body    |
| cg07311379 | IFT74    | chr9  | 0.477397283 | + T2D risk | Body    |
| cg12724384 | NCOA2    | chr8  | 0.477517201 | - T2D risk | 5'UTR   |
| cg14005211 | GAD1     | chr2  | 0.47773557  | - T2D risk | Body    |
| cg01278113 | RHBDD1   | chr2  | 0.477752647 | + T2D risk | Body    |
| cg11245088 | PPFIBP1  | chr12 | 0.477823199 | + T2D risk | 5'UTR   |
| cg17482114 | ADCY5    | chr3  | 0.477866212 | - T2D risk | Body    |
| cg22444124 | ITPKB    | chr1  | 0.47787263  | + T2D risk | Body    |
| cg04704169 | USP29    | chr19 | 0.47795808  | - T2D risk | TSS1500 |
| cg04914625 | PHACTR1  | chr6  | 0.47801462  | - T2D risk | Body    |
| cg02714148 | ANK2     | chr4  | 0.478135033 | - T2D risk | 5'UTR   |
| cg08642613 | CPLX2    | chr5  | 0.478155584 | + T2D risk | TSS1500 |
| cg17480466 | RGS7     | chr1  | 0.478233229 | - T2D risk | Body    |
| cg09043188 | PI15     | chr8  | 0.478286157 | - T2D risk | 3'UTR   |
| cg02233614 | PFKFB2   | chr1  | 0.478416364 | - T2D risk | 5'UTR   |
| cg04101351 | PDE3A    | chr12 | 0.478442552 | + T2D risk | 1stExon |
| cg00819417 | NF1      | chr17 | 0.478512061 | - T2D risk | Body    |
| cg24289219 | JPH2     | chr20 | 0.478609813 | - T2D risk | Body    |
| cg26669438 | EFR3A    | chr8  | 0.47862193  | - T2D risk | Body    |
| cg25441591 | PHF21A   | chr11 | 0.478655986 | - T2D risk | 5'UTR   |
| cg05817845 | JPH2     | chr20 | 0.478857931 | + T2D risk | TSS200  |
| cg09659208 | DIP2C    | chr10 | 0.47886494  | + T2D risk | Body    |
| cg00134028 | WIZ      | chr19 | 0.478886871 | - T2D risk | Body    |
| cg24863347 | MET      | chr7  | 0.478979374 | - T2D risk | Body    |
| cg07702255 | PHF21A   | chr11 | 0.479311326 | + T2D risk | TSS1500 |
| cg14754741 | PTPRU    | chr1  | 0.479348171 | + T2D risk | Body    |
| cg12643226 | NGF      | chr1  | 0.479398203 | + T2D risk | Body    |
| cg20538812 | NCOR1    | chr17 | 0.479431677 | + T2D risk | Body    |
| cg15981799 | JPH2     | chr20 | 0.479599168 | - T2D risk | Body    |
| cg08736034 | CDH22    | chr20 | 0.479688001 | - T2D risk | Body    |
| cg07363112 | SNX4     | chr3  | 0.479744182 | - T2D risk | TSS1500 |
| cg00115714 | AMD1     | chr6  | 0.479782308 | - T2D risk | 5'UTR   |
| cg00115714 | AMD1     | chr6  | 0.479782308 | - T2D risk | 1stExon |
| cg19596493 | PTP4A2   | chr1  | 0.4798067   | - T2D risk | TSS200  |
| cg19040173 | TANC2    | chr17 | 0.479818113 | - T2D risk | Body    |
| cg10997326 | CPLX2    | chr5  | 0.47993044  | + T2D risk | 5'UTR   |
| cg02423030 | MAST1    | chr19 | 0.479999564 | + T2D risk | Body    |
| cg26377120 | GNA12    | chr7  | 0.480150986 | + T2D risk | Body    |
| cg25823979 | DYNC111  | chr7  | 0.48033484  | - T2D risk | 5'UTR   |
| cg18094610 | GAD1     | chr2  | 0.480394972 | + T2D risk | TSS1500 |
| cg13605034 | CDH22    | chr20 | 0.480432993 | - T2D risk | Body    |
| cg22477590 | EFCAB14  | chr1  | 0.480461911 | - T2D risk | Body    |
| cg11007423 | SPPL2A   | chr15 | 0.480479859 | + T2D risk | TSS1500 |
| cg13305444 | ENAH     | chr1  | 0.480489321 | - T2D risk | Body    |
| cg13235721 | CUX1     | chr7  | 0.480504065 | - T2D risk | Body    |
| cg12482300 | ITPKB    | chr1  | 0.480509497 | + T2D risk | Body    |
| cg09373727 | PTP4A2   | chr1  | 0.480524235 | - T2D risk | TSS1500 |
| cg04825291 | ENAH     | chr1  | 0.480540907 | - T2D risk | Body    |
| cg22328512 | CALD1    | chr7  | 0.480625202 | + T2D risk | Body    |
| cg07636973 | KIAA1217 | chr10 | 0.480661911 | - T2D risk | Body    |
| cg02601188 | CPLX2    | chr5  | 0.480766615 | + T2D risk | 5'UTR   |
| cg14853946 | KIAA0232 | chr4  | 0.480929206 | - T2D risk | 3'UTR   |
| cg08095278 | ASH1L    | chr1  | 0.481009802 | - T2D risk | TSS1500 |
| cg00540828 | CUX1     | chr7  | 0.481064079 | - T2D risk | Body    |
| cg00320534 | DNAJC1   | chr10 | 0.481113451 | + T2D risk | Body    |
| cg19860734 | PACRG    | chr6  | 0.481242685 | + T2D risk | Body    |
| cg03954279 | ERC2     | chr3  | 0.481266444 | + T2D risk | Body    |
| cg23755860 | KIAA1217 | chr10 | 0.481498479 | + T2D risk | Body    |



|            |          |       |             |            |         |
|------------|----------|-------|-------------|------------|---------|
| cg02804067 | ST8SIA1  | chr12 | 0.481499698 | - T2D risk | Body    |
| cg23138179 | PDE5A    | chr4  | 0.481538112 | - T2D risk | Body    |
| cg23138179 | PDE5A    | chr4  | 0.481538112 | - T2D risk | 5'UTR   |
| cg10821320 | KDM4B    | chr19 | 0.481547065 | - T2D risk | Body    |
| cg26784952 | DACH1    | chr13 | 0.481552464 | - T2D risk | TSS1500 |
| cg03568236 | PRKCE    | chr2  | 0.481557395 | - T2D risk | Body    |
| cg23145714 | ATXN1    | chr6  | 0.481603885 | - T2D risk | 5'UTR   |
| cg11060759 | PTPRU    | chr1  | 0.481720045 | - T2D risk | Body    |
| cg11120971 | CUX1     | chr7  | 0.481842261 | - T2D risk | Body    |
| cg05054124 | ATP6V1H  | chr8  | 0.481985785 | - T2D risk | Body    |
| cg19191984 | PDE5A    | chr4  | 0.482039469 | - T2D risk | 1stExon |
| cg19191984 | PDE5A    | chr4  | 0.482039469 | - T2D risk | TSS1500 |
| cg16339924 | LAP3     | chr4  | 0.482146806 | + T2D risk | TSS200  |
| cg12525330 | DIP2C    | chr10 | 0.48235384  | + T2D risk | Body    |
| cg01247223 | CHID1    | chr11 | 0.482376275 | + T2D risk | Body    |
| cg27303655 | PRKAG2   | chr7  | 0.482437968 | + T2D risk | Body    |
| cg11619922 | GRK5     | chr10 | 0.482651041 | + T2D risk | Body    |
| cg25262999 | MET      | chr7  | 0.48285723  | - T2D risk | 3'UTR   |
| cg14027376 | GGPS1    | chr1  | 0.482997431 | - T2D risk | TSS1500 |
| cg06192755 | ERC2     | chr3  | 0.483008718 | - T2D risk | Body    |
| cg11312674 | GRK5     | chr10 | 0.483110364 | - T2D risk | Body    |
| cg10189247 | TTC28    | chr22 | 0.483219646 | + T2D risk | Body    |
| cg23290664 | TSHZ1    | chr18 | 0.483240322 | + T2D risk | Body    |
| cg20060396 | SCGN     | chr6  | 0.483440744 | + T2D risk | Body    |
| cg02507604 | CHFR     | chr12 | 0.483509011 | + T2D risk | 3'UTR   |
| cg16081609 | DNAJC1   | chr10 | 0.483509501 | - T2D risk | Body    |
| cg13742512 | CUX2     | chr12 | 0.48357013  | - T2D risk | Body    |
| cg21983048 | ASH1L    | chr1  | 0.483595633 | - T2D risk | Body    |
| cg08900316 | PRKCE    | chr2  | 0.483647337 | + T2D risk | Body    |
| cg20755612 | ANK3     | chr10 | 0.483874645 | - T2D risk | Body    |
| cg05291207 | NOL4     | chr18 | 0.48396994  | - T2D risk | Body    |
| cg09635232 | ENAH     | chr1  | 0.484047627 | + T2D risk | 1stExon |
| cg09635232 | ENAH     | chr1  | 0.484047627 | + T2D risk | 5'UTR   |
| cg06806958 | KIAA1217 | chr10 | 0.48410351  | - T2D risk | 1stExon |
| cg06806958 | KIAA1217 | chr10 | 0.48410351  | - T2D risk | 5'UTR   |
| cg14466661 | DIP2C    | chr10 | 0.484163297 | + T2D risk | Body    |
| cg19017135 | CDH22    | chr20 | 0.484258304 | + T2D risk | 5'UTR   |
| cg19643252 | PRKAG2   | chr7  | 0.484634608 | - T2D risk | Body    |
| cg06675341 | PRMT3    | chr11 | 0.484667901 | + T2D risk | TSS1500 |
| cg07281938 | WWP2     | chr16 | 0.484719593 | - T2D risk | Body    |
| cg10041241 | NOL4     | chr18 | 0.484766508 | - T2D risk | 5'UTR   |
| cg10041241 | NOL4     | chr18 | 0.484766508 | - T2D risk | Body    |
| cg15868287 | JPH2     | chr20 | 0.484770915 | + T2D risk | Body    |
| cg17103171 | TOX3     | chr16 | 0.484795868 | - T2D risk | 1stExon |
| cg17103171 | TOX3     | chr16 | 0.484795868 | - T2D risk | 5'UTR   |
| cg22909759 | PLEKHG3  | chr14 | 0.484864761 | + T2D risk | 5'UTR   |
| cg03494277 | CUX1     | chr7  | 0.485071038 | - T2D risk | Body    |
| cg22527533 | RCAN2    | chr6  | 0.485079937 | + T2D risk | Body    |
| cg09185679 | YWHAQ    | chr2  | 0.485320727 | - T2D risk | TSS1500 |
| cg06478249 | ST6GAL1  | chr3  | 0.485453654 | + T2D risk | 5'UTR   |
| cg19686983 | PHACTR1  | chr6  | 0.485506116 | + T2D risk | Body    |
| cg20007596 | PTP4A2   | chr1  | 0.485673259 | + T2D risk | 5'UTR   |
| cg21043716 | RGS7     | chr1  | 0.485849136 | + T2D risk | Body    |
| cg09591921 | PRKCB    | chr16 | 0.485903194 | - T2D risk | Body    |
| cg25728723 | NUP98    | chr11 | 0.485906907 | + T2D risk | 5'UTR   |
| cg25728723 | NUP98    | chr11 | 0.485906907 | + T2D risk | 1stExon |
| cg07108648 | ANK3     | chr10 | 0.486003106 | - T2D risk | TSS1500 |
| cg15385768 | MYO6     | chr6  | 0.486042852 | - T2D risk | 5'UTR   |
| cg18553223 | RAP1GAP2 | chr17 | 0.486050153 | + T2D risk | TSS1500 |
| cg00788156 | LYVE1    | chr11 | 0.486061205 | - T2D risk | TSS200  |
| cg06805236 | CUX2     | chr12 | 0.48610137  | - T2D risk | Body    |
| cg00426517 | PDLIM5   | chr4  | 0.48610437  | - T2D risk | TSS200  |
| cg13276501 | RSF1     | chr11 | 0.486134583 | - T2D risk | Body    |
| cg15151052 | PTPRU    | chr1  | 0.486158077 | + T2D risk | Body    |
| cg04352958 | ANK3     | chr10 | 0.486310975 | - T2D risk | Body    |
| cg19056691 | CUX2     | chr12 | 0.486406595 | - T2D risk | Body    |
| cg13962718 | ITPKB    | chr1  | 0.486529203 | + T2D risk | Body    |
| cg23336105 | NCOA2    | chr8  | 0.486534367 | - T2D risk | Body    |
| cg02214153 | RAP1GAP2 | chr17 | 0.486589639 | + T2D risk | Body    |
| cg27315279 | GRK5     | chr10 | 0.486782102 | + T2D risk | TSS1500 |



|            |           |       |             |            |         |
|------------|-----------|-------|-------------|------------|---------|
| cg10532246 | LMCD1     | chr3  | 0.486844612 | - T2D risk | TSS1500 |
| cg07629149 | DIP2C     | chr10 | 0.486966838 | + T2D risk | Body    |
| cg05457620 | SLIT3     | chr5  | 0.487027899 | - T2D risk | Body    |
| cg07104163 | TAZ       | chrX  | 0.487033836 | - T2D risk | Body    |
| cg21231909 | SPAG9     | chr17 | 0.487077186 | - T2D risk | Body    |
| cg18633230 | PRKAG2    | chr7  | 0.487081639 | + T2D risk | Body    |
| cg00005112 | WWP2      | chr16 | 0.487158187 | - T2D risk | TSS200  |
| cg00005112 | WWP2      | chr16 | 0.487158187 | - T2D risk | Body    |
| cg22444720 | NCOA7     | chr6  | 0.487166862 | + T2D risk | Body    |
| cg24663467 | ANK2      | chr4  | 0.48721183  | - T2D risk | Body    |
| cg24887139 | CNTNAP2   | chr7  | 0.487321567 | + T2D risk | 5'UTR   |
| cg24887139 | CNTNAP2   | chr7  | 0.487321567 | + T2D risk | 1stExon |
| cg16395614 | GRK5      | chr10 | 0.487517051 | + T2D risk | Body    |
| cg00315606 | HNRNPA2B1 | chr7  | 0.487576784 | + T2D risk | Body    |
| cg06354075 | NUP98     | chr11 | 0.487577055 | - T2D risk | Body    |
| cg26884345 | WWP2      | chr16 | 0.487986211 | - T2D risk | Body    |
| cg01112236 | PDE5A     | chr4  | 0.48801056  | - T2D risk | Body    |
| cg01434465 | TENM2     | chr5  | 0.488123969 | + T2D risk | Body    |
| cg01744651 | CUX1      | chr7  | 0.488147517 | - T2D risk | 3'UTR   |
| cg01744651 | CUX1      | chr7  | 0.488147517 | - T2D risk | Body    |
| cg11756387 | PTP4A2    | chr1  | 0.488157213 | + T2D risk | 5'UTR   |
| cg10845232 | PHACTR1   | chr6  | 0.488278101 | + T2D risk | Body    |
| cg23602489 | CUX1      | chr7  | 0.488306243 | - T2D risk | Body    |
| cg10132858 | RNF217    | chr6  | 0.488363108 | - T2D risk | Body    |
| cg23735442 | SMG7      | chr1  | 0.488462082 | - T2D risk | TSS1500 |
| cg23956091 | CADM1     | chr11 | 0.488491864 | - T2D risk | 3'UTR   |
| cg23924082 | SGSM2     | chr17 | 0.48849804  | - T2D risk | Body    |
| cg10211016 | ST6GAL1   | chr3  | 0.488577181 | + T2D risk | 5'UTR   |
| cg14698782 | KCNIP3    | chr2  | 0.488722707 | - T2D risk | Body    |
| cg13702235 | FNIP2     | chr4  | 0.488852956 | - T2D risk | TSS1500 |
| cg23239842 | NCOA2     | chr8  | 0.488882495 | + T2D risk | 5'UTR   |
| cg23239842 | NCOA2     | chr8  | 0.488882495 | + T2D risk | 1stExon |
| cg19110355 | WWP2      | chr16 | 0.488952818 | - T2D risk | 5'UTR   |
| cg18964988 | CUX2      | chr12 | 0.489073998 | - T2D risk | TSS1500 |
| cg16207991 | PHACTR1   | chr6  | 0.489144849 | + T2D risk | Body    |
| cg05709720 | NF1       | chr17 | 0.489274147 | + T2D risk | Body    |
| cg20834627 | ITPKB     | chr1  | 0.489300954 | + T2D risk | Body    |
| cg03424182 | APBA1     | chr9  | 0.489489747 | + T2D risk | Body    |
| cg07954671 | CADM1     | chr11 | 0.489634455 | - T2D risk | Body    |
| cg08342771 | SPOCK1    | chr5  | 0.489754669 | + T2D risk | Body    |
| cg08917023 | CREBBP    | chr16 | 0.489802468 | + T2D risk | Body    |
| cg03871180 | NPAT      | chr11 | 0.489813169 | - T2D risk | Body    |
| cg06835509 | PRKCB     | chr16 | 0.489873834 | - T2D risk | Body    |
| cg15574108 | PDLIM5    | chr4  | 0.489878366 | + T2D risk | 5'UTR   |
| cg15574108 | PDLIM5    | chr4  | 0.489878366 | + T2D risk | Body    |
| cg05316650 | GNA12     | chr7  | 0.489923706 | - T2D risk | Body    |
| cg26604311 | ITPKB     | chr1  | 0.489934722 | - T2D risk | Body    |
| cg04576426 | CUL1      | chr7  | 0.490034687 | + T2D risk | Body    |
| cg17416146 | EIF4EBP3  | chr5  | 0.490083878 | - T2D risk | TSS200  |
| cg19902173 | DIP2C     | chr10 | 0.490136451 | - T2D risk | Body    |
| cg03772219 | CNTNAP2   | chr7  | 0.49021574  | + T2D risk | Body    |
| cg04096435 | AMD1      | chr6  | 0.490264479 | - T2D risk | TSS1500 |
| cg03291835 | COL4A1    | chr13 | 0.490396492 | + T2D risk | Body    |
| cg06902358 | PRKAG2    | chr7  | 0.490481222 | - T2D risk | Body    |
| cg26432058 | NF1       | chr17 | 0.490642417 | + T2D risk | Body    |
| cg22734236 | FAM160A1  | chr4  | 0.490754417 | + T2D risk | 5'UTR   |
| cg25049299 | PTPRU     | chr1  | 0.490786511 | - T2D risk | Body    |
| cg09844001 | SLIT3     | chr5  | 0.490854857 | + T2D risk | Body    |
| cg17282085 | ROBO2     | chr3  | 0.491007321 | - T2D risk | Body    |
| cg14005725 | SH3GL2    | chr9  | 0.491007408 | + T2D risk | Body    |
| cg16315116 | ST6GAL1   | chr3  | 0.491076265 | + T2D risk | 5'UTR   |
| cg11553245 | SLC7A2    | chr8  | 0.491113237 | - T2D risk | 5'UTR   |
| cg06104935 | CUX1      | chr7  | 0.491213272 | + T2D risk | Body    |
| cg02869163 | AGPAT3    | chr21 | 0.491310602 | - T2D risk | 5'UTR   |
| cg22813220 | TMEM59    | chr1  | 0.491435407 | - T2D risk | TSS200  |
| cg14820356 | PRKCE     | chr2  | 0.491574492 | - T2D risk | Body    |
| cg16831612 | ADCY5     | chr3  | 0.491606796 | + T2D risk | Body    |
| cg01366698 | RHOA      | chr3  | 0.49168485  | - T2D risk | 3'UTR   |
| cg16405211 | CNTNAP2   | chr7  | 0.491740249 | - T2D risk | Body    |
| cg10515766 | CLOCK     | chr4  | 0.491752259 | + T2D risk | Body    |



|               |          |       |             |            |         |
|---------------|----------|-------|-------------|------------|---------|
| cg27405731    | CUX1     | chr7  | 0.491838423 | + T2D risk | Body    |
| cg24487076    | KIAA1217 | chr10 | 0.491875776 | - T2D risk | TSS200  |
| cg14980255    | MEIS2    | chr15 | 0.491977881 | - T2D risk | Body    |
| cg05379312    | ATP2B1   | chr12 | 0.492010535 | - T2D risk | Body    |
| cg15939539    | ANK2     | chr4  | 0.492070698 | - T2D risk | Body    |
| cg01999914    | NUP98    | chr11 | 0.492131729 | - T2D risk | Body    |
| cg14550163    | CUX2     | chr12 | 0.492205816 | - T2D risk | Body    |
| cg27033190    | HMBOX1   | chr8  | 0.492205926 | + T2D risk | TSS1500 |
| cg13312403    | NCOA2    | chr8  | 0.49223632  | + T2D risk | 5'UTR   |
| cg07499372    | USP29    | chr19 | 0.492290751 | - T2D risk | TSS1500 |
| cg03459202    | DIP2C    | chr10 | 0.492323271 | + T2D risk | Body    |
| cg18316621    | PLAGL1   | chr6  | 0.492329924 | - T2D risk | 5'UTR   |
| cg15784881    | CREBBP   | chr16 | 0.492524585 | - T2D risk | Body    |
| cg12063688    | PLEKHG3  | chr14 | 0.492656098 | + T2D risk | 5'UTR   |
| cg09740815    | CREBBP   | chr16 | 0.4926868   | - T2D risk | Body    |
| cg07168181    | GNA12    | chr7  | 0.492879354 | - T2D risk | TSS200  |
| cg06890870    | SEMA3G   | chr3  | 0.492924953 | + T2D risk | 3'UTR   |
| cg07392884    | LAMA4    | chr6  | 0.493093564 | - T2D risk | Body    |
| cg11863954    | CUX2     | chr12 | 0.493107373 | - T2D risk | Body    |
| cg05569793    | MEIS2    | chr15 | 0.493118531 | + T2D risk | Body    |
| cg20895389    | RSF1     | chr11 | 0.493147703 | - T2D risk | TSS200  |
| cg02862153    | CUX1     | chr7  | 0.493163385 | - T2D risk | TSS1500 |
| cg02862153    | CUX1     | chr7  | 0.493163385 | - T2D risk | Body    |
| cg02937158    | DDC      | chr7  | 0.49340268  | + T2D risk | TSS1500 |
| cg02937158    | DDC      | chr7  | 0.49340268  | + T2D risk | 5'UTR   |
| cg04687318    | PRKAG2   | chr7  | 0.4935014   | + T2D risk | Body    |
| cg19068421    | WDR48    | chr3  | 0.493534165 | + T2D risk | Body    |
| cg14571344    | CRYL1    | chr13 | 0.493867433 | + T2D risk | Body    |
| cg12796844    | PACRG    | chr6  | 0.494100162 | + T2D risk | Body    |
| cg26514816    | ATRN     | chr20 | 0.494104047 | - T2D risk | Body    |
| cg21857945    | FLT1     | chr13 | 0.49421956  | + T2D risk | Body    |
| cg26673980    | PRKAG2   | chr7  | 0.494229913 | - T2D risk | 5'UTR   |
| cg26673980    | PRKAG2   | chr7  | 0.494229913 | - T2D risk | Body    |
| cg11813690    | CUX2     | chr12 | 0.494236435 | - T2D risk | Body    |
| cg14647131    | ANK3     | chr10 | 0.494276437 | - T2D risk | 1stExon |
| cg14647131    | ANK3     | chr10 | 0.494276437 | - T2D risk | 5'UTR   |
| cg14647131    | ANK3     | chr10 | 0.494276437 | - T2D risk | Body    |
| cg02902800    | KIAA0232 | chr4  | 0.494320051 | + T2D risk | TSS1500 |
| cg23735092    | RAP1GAP2 | chr17 | 0.494351042 | + T2D risk | Body    |
| cg12322190    | TMEM131  | chr2  | 0.494419515 | + T2D risk | Body    |
| cg23832749    | RET      | chr10 | 0.494495036 | + T2D risk | Body    |
| cg05484691    | DIP2C    | chr10 | 0.494495752 | - T2D risk | 3'UTR   |
| cg19139618    | SKAP1    | chr17 | 0.494500531 | - T2D risk | Body    |
| cg12769509    | ULK4     | chr3  | 0.494592166 | + T2D risk | Body    |
| cg12769509    | ULK4     | chr3  | 0.494592166 | + T2D risk | ExonBnd |
| cg08803490    | PPP1R12A | chr12 | 0.494667445 | + T2D risk | Body    |
| cg08803490    | PPP1R12A | chr12 | 0.494667445 | + T2D risk | 5'UTR   |
| cg24880316    | RNF157   | chr17 | 0.494813616 | - T2D risk | Body    |
| ch.10.645342R | KIAA1217 | chr10 | 0.494906471 | - T2D risk | Body    |
| cg10269608    | USP53    | chr4  | 0.495069689 | - T2D risk | 5'UTR   |
| cg15609913    | SGSM2    | chr17 | 0.49513063  | + T2D risk | Body    |
| cg12026045    | TSC22D1  | chr13 | 0.495300498 | - T2D risk | TSS1500 |
| cg12026045    | TSC22D1  | chr13 | 0.495300498 | - T2D risk | Body    |
| cg02549290    | TSC22D1  | chr13 | 0.495310648 | + T2D risk | 1stExon |
| cg02549290    | TSC22D1  | chr13 | 0.495310648 | + T2D risk | 5'UTR   |
| cg02549290    | TSC22D1  | chr13 | 0.495310648 | + T2D risk | Body    |
| cg20712669    | NOTCH3   | chr19 | 0.495537278 | - T2D risk | Body    |
| cg08983700    | NCOR1    | chr17 | 0.495609428 | - T2D risk | Body    |
| cg10878982    | PACS1    | chr11 | 0.495667169 | - T2D risk | Body    |
| cg22441846    | FNIP2    | chr4  | 0.495765412 | + T2D risk | Body    |
| cg09097040    | MDM1     | chr12 | 0.495804548 | + T2D risk | TSS1500 |
| cg06403660    | ST8SIA1  | chr12 | 0.495815478 | + T2D risk | 1stExon |
| cg06403660    | ST8SIA1  | chr12 | 0.495815478 | + T2D risk | 5'UTR   |
| cg16973751    | SLC9A6   | chrX  | 0.496017462 | - T2D risk | 3'UTR   |
| cg17190608    | CUX2     | chr12 | 0.496111201 | + T2D risk | TSS1500 |
| cg14605119    | DIP2C    | chr10 | 0.496143754 | - T2D risk | Body    |
| cg07750727    | KREMEN1  | chr22 | 0.496198418 | + T2D risk | Body    |
| cg26310823    | NGLY1    | chr3  | 0.496232569 | - T2D risk | Body    |
| cg17769854    | CALD1    | chr7  | 0.496331714 | - T2D risk | 5'UTR   |
| cg04113977    | UXS1     | chr2  | 0.496583615 | + T2D risk | Body    |



|            |          |       |             |            |         |
|------------|----------|-------|-------------|------------|---------|
| cg00412337 | CLIC5    | chr6  | 0.496635407 | - T2D risk | Body    |
| cg14413674 | ARHGEF9  | chrX  | 0.496724404 | - T2D risk | Body    |
| cg24301101 | PHACTR1  | chr6  | 0.496759086 | + T2D risk | Body    |
| cg23734205 | TAB2     | chr6  | 0.496820979 | + T2D risk | Body    |
| cg17678144 | UBL3     | chr13 | 0.496880075 | + T2D risk | TSS1500 |
| cg11397668 | NCOA2    | chr8  | 0.497018707 | - T2D risk | Body    |
| cg27464670 | PRKCB    | chr16 | 0.49716424  | - T2D risk | Body    |
| cg25010192 | AGPAT3   | chr21 | 0.49717037  | - T2D risk | 5'UTR   |
| cg24472496 | RGS7     | chr1  | 0.497250144 | - T2D risk | TSS1500 |
| cg26880200 | NOTCH3   | chr19 | 0.497352028 | - T2D risk | Body    |
| cg14107889 | CDH22    | chr20 | 0.49747476  | + T2D risk | 5'UTR   |
| cg16228716 | SSBP2    | chr5  | 0.497708864 | - T2D risk | Body    |
| cg03157150 | MGRN1    | chr16 | 0.497770253 | + T2D risk | Body    |
| cg03157150 | MGRN1    | chr16 | 0.497770253 | + T2D risk | 3'UTR   |
| cg22164298 | ANK2     | chr4  | 0.497899756 | + T2D risk | Body    |
| cg04822434 | LAMA4    | chr6  | 0.498048669 | - T2D risk | Body    |
| cg07985679 | CADM1    | chr11 | 0.498208774 | - T2D risk | Body    |
| cg14678774 | MAST1    | chr19 | 0.498270711 | + T2D risk | Body    |
| cg10161423 | SLC29A4  | chr7  | 0.498310017 | + T2D risk | 5'UTR   |
| cg15815767 | RHOQ     | chr2  | 0.49853063  | - T2D risk | TSS200  |
| cg03451743 | PRKAG2   | chr7  | 0.49863136  | + T2D risk | Body    |
| cg09085932 | GRK5     | chr10 | 0.498705181 | + T2D risk | Body    |
| cg09887927 | RNF157   | chr17 | 0.498748424 | + T2D risk | Body    |
| cg01169981 | PDE8A    | chr15 | 0.49883237  | + T2D risk | Body    |
| cg27375542 | UXS1     | chr2  | 0.498868362 | - T2D risk | Body    |
| cg13698274 | TJP1     | chr15 | 0.498869725 | + T2D risk | TSS200  |
| cg13698274 | TJP1     | chr15 | 0.498869725 | + T2D risk | TSS1500 |
| cg13698274 | TJP1     | chr15 | 0.498869725 | + T2D risk | Body    |
| cg03843951 | DDC      | chr7  | 0.498941022 | + T2D risk | TSS1500 |
| cg03843951 | DDC      | chr7  | 0.498941022 | + T2D risk | 5'UTR   |
| cg21787516 | SRPK2    | chr7  | 0.498996386 | + T2D risk | Body    |
| cg00421815 | ARL15    | chr5  | 0.499103708 | + T2D risk | Body    |
| cg06169878 | CPLX2    | chr5  | 0.499111061 | + T2D risk | 5'UTR   |
| cg14627974 | CNTNAP2  | chr7  | 0.499461833 | - T2D risk | Body    |
| cg18387085 | TSHZ1    | chr18 | 0.499674221 | - T2D risk | TSS200  |
| cg01778683 | UXS1     | chr2  | 0.499836677 | - T2D risk | Body    |
| cg08390987 | KDM4B    | chr19 | 0.49996035  | + T2D risk | Body    |
| cg20675274 | NUP98    | chr11 | 0.500179238 | - T2D risk | TSS1500 |
| cg12342484 | ERC2     | chr3  | 0.500225967 | - T2D risk | Body    |
| cg02172857 | LCA5     | chr6  | 0.500425253 | - T2D risk | TSS1500 |
| cg24863706 | PDE5A    | chr4  | 0.500463382 | - T2D risk | Body    |
| cg24863706 | PDE5A    | chr4  | 0.500463382 | - T2D risk | 1stExon |
| cg24863706 | PDE5A    | chr4  | 0.500463382 | - T2D risk | TSS1500 |
| cg24863706 | PDE5A    | chr4  | 0.500463382 | - T2D risk | 5'UTR   |
| cg04777881 | PPFIBP1  | chr12 | 0.50050243  | - T2D risk | TSS200  |
| cg26569670 | NCOA2    | chr8  | 0.50059725  | - T2D risk | 5'UTR   |
| cg10724969 | CLASP2   | chr3  | 0.500821243 | - T2D risk | Body    |
| cg02234780 | EVI5     | chr1  | 0.500887668 | - T2D risk | Body    |
| cg14715946 | EVI5     | chr1  | 0.500901915 | - T2D risk | Body    |
| cg06007042 | ROBO2    | chr3  | 0.500996258 | + T2D risk | 5'UTR   |
| cg06007042 | ROBO2    | chr3  | 0.500996258 | + T2D risk | Body    |
| cg00156147 | TENM2    | chr5  | 0.501036712 | + T2D risk | Body    |
| cg11453891 | ST6GAL1  | chr3  | 0.50104624  | - T2D risk | 5'UTR   |
| cg16794609 | PHF21A   | chr11 | 0.501354421 | - T2D risk | Body    |
| cg27623536 | LYVE1    | chr11 | 0.501358103 | - T2D risk | TSS1500 |
| cg21652122 | TTC28    | chr22 | 0.5013866   | + T2D risk | Body    |
| cg12151083 | ATP8A2   | chr13 | 0.501543104 | + T2D risk | Body    |
| cg11439050 | ASH1L    | chr1  | 0.501557418 | - T2D risk | TSS200  |
| cg04095373 | SKAP1    | chr17 | 0.50156402  | + T2D risk | Body    |
| cg15028103 | KCNJ12   | chr17 | 0.501650863 | + T2D risk | TSS1500 |
| cg04087057 | MGRN1    | chr16 | 0.501730708 | + T2D risk | Body    |
| cg13572780 | KIAA1217 | chr10 | 0.501744294 | - T2D risk | Body    |
| cg13211927 | CHKA     | chr11 | 0.501792876 | - T2D risk | Body    |
| cg25733327 | PACS2    | chr14 | 0.501800732 | - T2D risk | TSS1500 |
| cg20811761 | ATRNL    | chr20 | 0.501843037 | - T2D risk | Body    |
| cg05549853 | ARIH1    | chr15 | 0.50184967  | - T2D risk | Body    |
| cg08771353 | ATXN1    | chr6  | 0.501855263 | - T2D risk | 5'UTR   |
| cg04640913 | CDH22    | chr20 | 0.501864055 | - T2D risk | TSS200  |
| cg04024781 | SPAG9    | chr17 | 0.501888068 | + T2D risk | Body    |
| cg11116202 | ANK3     | chr10 | 0.501908008 | - T2D risk | Body    |



|            |                 |       |             |            |         |
|------------|-----------------|-------|-------------|------------|---------|
| cg07342306 | <i>RAP1GAP2</i> | chr17 | 0.502035414 | + T2D risk | Body    |
| cg04383817 | <i>NCOA7</i>    | chr6  | 0.502064622 | + T2D risk | 5'UTR   |
| cg07145942 | <i>LAMA4</i>    | chr6  | 0.502118889 | - T2D risk | Body    |
| cg15339616 | <i>ST20</i>     | chr15 | 0.502138118 | - T2D risk | TSS1500 |
| cg15339616 | <i>ST20</i>     | chr15 | 0.502138118 | - T2D risk | 5'UTR   |
| cg05013337 | <i>TTC28</i>    | chr22 | 0.502308431 | + T2D risk | Body    |
| cg06757067 | <i>SMG7</i>     | chr1  | 0.502499105 | + T2D risk | Body    |
| cg24433646 | <i>RNF157</i>   | chr17 | 0.502550116 | - T2D risk | Body    |
| cg18789476 | <i>DYNC111</i>  | chr7  | 0.502594731 | + T2D risk | TSS1500 |
| cg05174595 | <i>ZDHHC2</i>   | chr8  | 0.502782227 | + T2D risk | Body    |
| cg07716832 | <i>PRKCE</i>    | chr2  | 0.502787091 | - T2D risk | Body    |
| cg04854162 | <i>DIP2C</i>    | chr10 | 0.502788165 | + T2D risk | Body    |
| cg22374834 | <i>ERC2</i>     | chr3  | 0.502827858 | + T2D risk | Body    |
| cg09334634 | <i>PRKAG2</i>   | chr7  | 0.502923895 | + T2D risk | Body    |
| cg16774853 | <i>RNF157</i>   | chr17 | 0.503257199 | - T2D risk | Body    |
| cg01868752 | <i>CNTNAP2</i>  | chr7  | 0.503436451 | + T2D risk | Body    |
| cg19695867 | <i>WDR47</i>    | chr1  | 0.503445246 | - T2D risk | TSS1500 |
| cg06333800 | <i>PRKAG2</i>   | chr7  | 0.503583142 | + T2D risk | Body    |
| cg11671969 | <i>ST20</i>     | chr15 | 0.503588167 | + T2D risk | 5'UTR   |
| cg13883522 | <i>ATP8A2</i>   | chr13 | 0.50366195  | - T2D risk | Body    |
| cg12594731 | <i>ITGA1</i>    | chr5  | 0.503670053 | - T2D risk | Body    |
| cg27193519 | <i>MGRN1</i>    | chr16 | 0.503737853 | - T2D risk | Body    |
| cg11524174 | <i>ANK3</i>     | chr10 | 0.503748088 | - T2D risk | Body    |
| cg07344315 | <i>RAP1B</i>    | chr12 | 0.504131014 | - T2D risk | 3'UTR   |
| cg19310653 | <i>CUX1</i>     | chr7  | 0.504614191 | + T2D risk | Body    |
| cg20927070 | <i>CUX1</i>     | chr7  | 0.504660725 | - T2D risk | Body    |
| cg20457962 | <i>NUP98</i>    | chr11 | 0.504742703 | - T2D risk | TSS1500 |
| cg20666271 | <i>SCARB2</i>   | chr4  | 0.504744461 | + T2D risk | TSS1500 |
| cg26944382 | <i>NOL4</i>     | chr18 | 0.504747318 | - T2D risk | Body    |
| cg26944382 | <i>NOL4</i>     | chr18 | 0.504747318 | - T2D risk | TSS200  |
| cg04936932 | <i>SGSM2</i>    | chr17 | 0.504763527 | - T2D risk | 3'UTR   |
| cg13552073 | <i>RAP1GAP2</i> | chr17 | 0.505027165 | + T2D risk | Body    |
| cg01129684 | <i>TPCN1</i>    | chr12 | 0.505054258 | + T2D risk | 3'UTR   |
| cg22455082 | <i>UBE2K</i>    | chr4  | 0.50528755  | - T2D risk | Body    |
| cg14807046 | <i>ARL15</i>    | chr5  | 0.50531091  | + T2D risk | Body    |
| cg02746771 | <i>DIP2C</i>    | chr10 | 0.505314349 | - T2D risk | Body    |
| cg02884197 | <i>RCAN2</i>    | chr6  | 0.505423056 | + T2D risk | Body    |
| cg02574024 | <i>RHOQ</i>     | chr2  | 0.505431959 | + T2D risk | TSS1500 |
| cg02324737 | <i>DYNC112</i>  | chr2  | 0.505501727 | - T2D risk | TSS200  |
| cg17704449 | <i>PRKD1</i>    | chr14 | 0.505501847 | + T2D risk | Body    |
| cg12428440 | <i>PRKCE</i>    | chr2  | 0.505521961 | + T2D risk | Body    |
| cg25560141 | <i>ATRNL1</i>   | chr10 | 0.505555625 | - T2D risk | Body    |
| cg11733738 | <i>TAB2</i>     | chr6  | 0.505586707 | - T2D risk | 5'UTR   |
| cg11733738 | <i>TAB2</i>     | chr6  | 0.505586707 | - T2D risk | Body    |
| cg20920104 | <i>ANKHD1</i>   | chr5  | 0.505670712 | - T2D risk | Body    |
| cg03607379 | <i>POLA1</i>    | chrX  | 0.505741154 | + T2D risk | Body    |
| cg01259486 | <i>DIP2C</i>    | chr10 | 0.505791421 | + T2D risk | Body    |
| cg15810754 | <i>TJP1</i>     | chr15 | 0.506077988 | + T2D risk | Body    |
| cg03191241 | <i>DNAH9</i>    | chr17 | 0.506139978 | - T2D risk | Body    |
| cg26725354 | <i>RGS7</i>     | chr1  | 0.506245562 | - T2D risk | Body    |
| cg01266790 | <i>PACS2</i>    | chr14 | 0.506702522 | + T2D risk | 1stExon |
| cg00529545 | <i>PACRG</i>    | chr6  | 0.506749209 | - T2D risk | Body    |
| cg02383173 | <i>PDLIM5</i>   | chr4  | 0.506875919 | - T2D risk | TSS1500 |
| cg20715438 | <i>RAP1GAP2</i> | chr17 | 0.506877276 | + T2D risk | Body    |
| cg10692436 | <i>TPCN1</i>    | chr12 | 0.506878454 | - T2D risk | Body    |
| cg12903574 | <i>MEIS2</i>    | chr15 | 0.506893654 | - T2D risk | Body    |
| cg22843424 | <i>SLC7A2</i>   | chr8  | 0.506903674 | + T2D risk | Body    |
| cg11863755 | <i>RAP1GAP2</i> | chr17 | 0.506920128 | + T2D risk | Body    |
| cg21992844 | <i>NGLY1</i>    | chr3  | 0.506930237 | - T2D risk | Body    |
| cg21992844 | <i>OXSM</i>     | chr3  | 0.506930237 | - T2D risk | TSS1500 |
| cg01073046 | <i>POC1B</i>    | chr12 | 0.506964825 | - T2D risk | 5'UTR   |
| cg01073046 | <i>POC1B</i>    | chr12 | 0.506964825 | - T2D risk | Body    |
| cg02273535 | <i>SUB1</i>     | chr5  | 0.507024988 | - T2D risk | TSS200  |
| cg19010139 | <i>ULK4</i>     | chr3  | 0.507042305 | + T2D risk | Body    |
| cg20183705 | <i>ATXN1</i>    | chr6  | 0.507175074 | - T2D risk | 5'UTR   |
| cg26689765 | <i>ITGA1</i>    | chr5  | 0.507176058 | + T2D risk | TSS1500 |
| cg12033578 | <i>RAP1B</i>    | chr12 | 0.507209569 | + T2D risk | Body    |
| cg03921870 | <i>TTC28</i>    | chr22 | 0.507225943 | + T2D risk | Body    |
| cg15432831 | <i>ASH1L</i>    | chr1  | 0.507230246 | - T2D risk | 5'UTR   |
| cg00268177 | <i>ATXN1</i>    | chr6  | 0.507271306 | - T2D risk | 5'UTR   |



|            |          |       |             |            |         |
|------------|----------|-------|-------------|------------|---------|
| cg03952736 | NUP98    | chr11 | 0.507313176 | - T2D risk | 5'UTR   |
| cg11802553 | PLEKHG3  | chr14 | 0.507411009 | + T2D risk | Body    |
| cg12253830 | ST8SIA1  | chr12 | 0.507526215 | + T2D risk | TSS200  |
| cg17125719 | NCOA2    | chr8  | 0.507564533 | + T2D risk | 5'UTR   |
| cg10074979 | CRYL1    | chr13 | 0.507655017 | + T2D risk | Body    |
| cg19458485 | PHACTR1  | chr6  | 0.507689336 | + T2D risk | Body    |
| cg20540629 | SKAP1    | chr17 | 0.507696047 | - T2D risk | Body    |
| cg13592941 | CUX2     | chr12 | 0.5077625   | + T2D risk | Body    |
| cg04719420 | SMG7     | chr1  | 0.507766258 | - T2D risk | TSS200  |
| cg23702038 | PPP1R12A | chr12 | 0.507806978 | - T2D risk | Body    |
| cg13780614 | GALK2    | chr15 | 0.507864729 | - T2D risk | Body    |
| cg08571547 | RBM4     | chr11 | 0.50794478  | - T2D risk | 3'UTR   |
| cg22677755 | CRYL1    | chr13 | 0.508083411 | - T2D risk | Body    |
| cg20841436 | PACRG    | chr6  | 0.508149377 | - T2D risk | Body    |
| cg21232904 | LMCD1    | chr3  | 0.508228736 | + T2D risk | TSS200  |
| cg01663295 | PACS1    | chr11 | 0.508291755 | + T2D risk | TSS1500 |
| cg10720966 | CUX1     | chr7  | 0.508458816 | + T2D risk | Body    |
| cg13800209 | MEIS2    | chr15 | 0.508545617 | + T2D risk | 5'UTR   |
| cg13800209 | MEIS2    | chr15 | 0.508545617 | + T2D risk | 1stExon |
| cg13800209 | MEIS2    | chr15 | 0.508545617 | + T2D risk | Body    |
| cg18376773 | CDH22    | chr20 | 0.508761309 | + T2D risk | Body    |
| cg03577350 | PRKCE    | chr2  | 0.508817144 | + T2D risk | Body    |
| cg01763173 | GAD1     | chr2  | 0.508864865 | - T2D risk | 5'UTR   |
| cg16046214 | RANBP17  | chr5  | 0.508919002 | + T2D risk | Body    |
| cg14470594 | PCYT1A   | chr3  | 0.508971368 | + T2D risk | TSS200  |
| cg06421161 | ATXN1    | chr6  | 0.508984032 | - T2D risk | Body    |
| cg03305916 | KIAA1217 | chr10 | 0.509172269 | + T2D risk | Body    |
| cg04530345 | ARL15    | chr5  | 0.509182266 | - T2D risk | Body    |
| cg25362120 | PACRG    | chr6  | 0.509284912 | - T2D risk | Body    |
| cg17905091 | DIP2C    | chr10 | 0.509327107 | + T2D risk | Body    |
| cg03144206 | ACTN4    | chr19 | 0.509479487 | - T2D risk | TSS1500 |
| cg11742016 | ATP8A1   | chr4  | 0.509578538 | - T2D risk | Body    |
| cg09979989 | SGSM2    | chr17 | 0.509670182 | + T2D risk | Body    |
| cg03033000 | WWP2     | chr16 | 0.509678777 | - T2D risk | 5'UTR   |
| cg25293430 | ANK2     | chr4  | 0.509885777 | - T2D risk | 5'UTR   |
| cg16633848 | PICALM   | chr11 | 0.509893762 | - T2D risk | TSS200  |
| cg22757824 | COL4A1   | chr13 | 0.510025727 | - T2D risk | TSS1500 |
| cg08858723 | ZHX2     | chr8  | 0.510151045 | + T2D risk | 5'UTR   |
| cg08355739 | ATXN1    | chr6  | 0.510167696 | + T2D risk | 5'UTR   |
| cg00112341 | ERC2     | chr3  | 0.510288662 | + T2D risk | Body    |
| cg23221504 | GAD1     | chr2  | 0.510312356 | + T2D risk | TSS200  |
| cg02290623 | PDE8A    | chr15 | 0.510314238 | - T2D risk | 5'UTR   |
| cg02290623 | PDE8A    | chr15 | 0.510314238 | - T2D risk | Body    |
| cg16225947 | TJP1     | chr15 | 0.510501239 | + T2D risk | Body    |
| cg23052793 | PRKACB   | chr1  | 0.510537365 | - T2D risk | Body    |
| cg13051202 | CHKA     | chr11 | 0.510626549 | + T2D risk | Body    |
| cg01451541 | ERC2     | chr3  | 0.510681672 | + T2D risk | Body    |
| cg03775632 | CALD1    | chr7  | 0.510754242 | + T2D risk | Body    |
| cg08817610 | TTC28    | chr22 | 0.510829538 | - T2D risk | Body    |
| cg24630943 | SLIT3    | chr5  | 0.511272197 | - T2D risk | Body    |
| cg19282586 | CLEC16A  | chr16 | 0.511435168 | + T2D risk | Body    |
| cg02515354 | CNTNAP2  | chr7  | 0.511536079 | - T2D risk | Body    |
| cg02958709 | APBA1    | chr9  | 0.511585008 | - T2D risk | ExonBnd |
| cg02958709 | APBA1    | chr9  | 0.511585008 | - T2D risk | Body    |
| cg00194374 | ITPKB    | chr1  | 0.511744939 | + T2D risk | Body    |
| cg03850491 | CLASP2   | chr3  | 0.511797513 | + T2D risk | Body    |
| cg17412560 | KCNIP3   | chr2  | 0.51179832  | + T2D risk | Body    |
| cg18666944 | ATXN1    | chr6  | 0.511810842 | - T2D risk | 5'UTR   |
| cg17573365 | PACS1    | chr11 | 0.511816389 | - T2D risk | Body    |
| cg05145839 | PHF21A   | chr11 | 0.511889204 | + T2D risk | Body    |
| cg24039723 | ANK3     | chr10 | 0.511915954 | - T2D risk | Body    |
| cg19736276 | ARIH1    | chr15 | 0.511972123 | + T2D risk | 5'UTR   |
| cg19736276 | ARIH1    | chr15 | 0.511972123 | + T2D risk | 1stExon |
| cg27531356 | CNTNAP2  | chr7  | 0.512200913 | - T2D risk | Body    |
| cg11196702 | PRKAG2   | chr7  | 0.512365567 | - T2D risk | 5'UTR   |
| cg11196702 | PRKAG2   | chr7  | 0.512365567 | - T2D risk | Body    |
| cg20336857 | DNAH9    | chr17 | 0.512418339 | + T2D risk | TSS1500 |
| cg20336857 | DNAH9    | chr17 | 0.512418339 | + T2D risk | Body    |
| cg10087081 | KIAA0355 | chr19 | 0.512459011 | - T2D risk | 5'UTR   |
| cg18765724 | SKAP1    | chr17 | 0.512501396 | + T2D risk | Body    |



|            |          |       |             |            |         |
|------------|----------|-------|-------------|------------|---------|
| cg14346532 | NGLY1    | chr3  | 0.512723777 | - T2D risk | Body    |
| cg27028557 | TPCN1    | chr12 | 0.512728218 | - T2D risk | 5'UTR   |
| cg05854775 | ANK2     | chr4  | 0.512753238 | - T2D risk | Body    |
| cg03608853 | TAB2     | chr6  | 0.512779884 | + T2D risk | TSS1500 |
| cg12600337 | SUB1     | chr5  | 0.512805402 | - T2D risk | TSS1500 |
| cg20865131 | PRKAG2   | chr7  | 0.512821738 | - T2D risk | Body    |
| cg14124587 | SEC31A   | chr4  | 0.512987262 | - T2D risk | 5'UTR   |
| cg14124587 | SEC31A   | chr4  | 0.512987262 | - T2D risk | Body    |
| cg09522226 | TTC28    | chr22 | 0.513020553 | - T2D risk | Body    |
| cg13471349 | RAP1GAP2 | chr17 | 0.513125686 | - T2D risk | Body    |
| cg00958342 | MEIS2    | chr15 | 0.513193737 | - T2D risk | Body    |
| cg07812289 | MGRN1    | chr16 | 0.513245229 | + T2D risk | Body    |
| cg24033032 | CUL1     | chr7  | 0.513342988 | + T2D risk | Body    |
| cg04786050 | SLIT3    | chr5  | 0.513381688 | - T2D risk | Body    |
| cg14318115 | RBBP6    | chr16 | 0.513421789 | + T2D risk | TSS1500 |
| cg00349770 | CUX1     | chr7  | 0.513496813 | - T2D risk | Body    |
| cg08858458 | ARIH1    | chr15 | 0.513551915 | + T2D risk | Body    |
| cg11409308 | RHOA     | chr3  | 0.513630564 | - T2D risk | Body    |
| cg08199717 | KIAA1217 | chr10 | 0.513742914 | + T2D risk | 5'UTR   |
| cg06773247 | SGSM2    | chr17 | 0.51383347  | + T2D risk | Body    |
| cg00742573 | BCAT1    | chr12 | 0.513925243 | + T2D risk | Body    |
| cg24146047 | FLT1     | chr13 | 0.513952026 | + T2D risk | Body    |
| cg21323738 | NF1      | chr17 | 0.514043708 | - T2D risk | Body    |
| cg27315601 | DIP2C    | chr10 | 0.514083691 | - T2D risk | Body    |
| cg02062384 | RAP1GAP2 | chr17 | 0.514134557 | - T2D risk | Body    |
| cg13751476 | COL4A1   | chr13 | 0.514185549 | - T2D risk | Body    |
| cg02035603 | ARL15    | chr5  | 0.514290918 | + T2D risk | Body    |
| cg03409395 | KIAA1217 | chr10 | 0.514363023 | + T2D risk | Body    |
| cg15054429 | SKAP1    | chr17 | 0.514402828 | - T2D risk | Body    |
| cg05848001 | ACTN4    | chr19 | 0.51446233  | + T2D risk | Body    |
| cg05184564 | BCAT1    | chr12 | 0.514527915 | - T2D risk | Body    |
| cg21582240 | SPOCK1   | chr5  | 0.514585982 | + T2D risk | Body    |
| cg17514249 | COL4A1   | chr13 | 0.51462133  | - T2D risk | Body    |
| cg00674311 | DIP2C    | chr10 | 0.514670687 | - T2D risk | Body    |
| cg15542608 | PHACTR1  | chr6  | 0.514742232 | - T2D risk | Body    |
| cg02252638 | RCAN2    | chr6  | 0.514770295 | - T2D risk | Body    |
| cg27004760 | MGRN1    | chr16 | 0.514985291 | - T2D risk | Body    |
| cg04212729 | PLEKHG3  | chr14 | 0.514994029 | + T2D risk | TSS200  |
| cg21934237 | NUF2     | chr1  | 0.515002072 | + T2D risk | TSS1500 |
| cg05977462 | CUX2     | chr12 | 0.515122718 | - T2D risk | Body    |
| cg17665095 | ERC2     | chr3  | 0.515162461 | + T2D risk | Body    |
| cg16551122 | ANK3     | chr10 | 0.51521688  | + T2D risk | Body    |
| cg16062451 | CDH22    | chr20 | 0.515226328 | - T2D risk | Body    |
| cg24723331 | ST8SIA1  | chr12 | 0.515237022 | + T2D risk | 1stExon |
| cg24723331 | ST8SIA1  | chr12 | 0.515237022 | + T2D risk | 5'UTR   |
| cg08255636 | KIAA1109 | chr4  | 0.515279304 | - T2D risk | Body    |
| cg08255636 | KIAA1109 | chr4  | 0.515279304 | - T2D risk | ExonBnd |
| cg25946714 | MTHFS    | chr15 | 0.515323854 | - T2D risk | Body    |
| cg25946714 | MTHFS    | chr15 | 0.515323854 | - T2D risk | 3'UTR   |
| cg22170402 | MYO6     | chr6  | 0.515341579 | + T2D risk | Body    |
| cg16950783 | ANK3     | chr10 | 0.515355211 | + T2D risk | Body    |
| cg22400109 | PACS2    | chr14 | 0.515405353 | - T2D risk | 5'UTR   |
| cg09499177 | AGPAT3   | chr21 | 0.515405823 | + T2D risk | 5'UTR   |
| cg08839770 | PDLIM5   | chr4  | 0.515495841 | + T2D risk | 5'UTR   |
| cg08839770 | PDLIM5   | chr4  | 0.515495841 | + T2D risk | Body    |
| cg10093761 | IFT74    | chr9  | 0.515513222 | - T2D risk | Body    |
| cg14526082 | TANC2    | chr17 | 0.515828825 | - T2D risk | Body    |
| cg23142800 | DYNC111  | chr7  | 0.515845861 | + T2D risk | Body    |
| cg21134382 | PDE3A    | chr12 | 0.515896859 | + T2D risk | Body    |
| cg21428874 | RET      | chr10 | 0.516058876 | + T2D risk | Body    |
| cg24981221 | HMBBOX1  | chr8  | 0.51617533  | + T2D risk | Body    |
| cg27233612 | NGLY1    | chr3  | 0.516175991 | + T2D risk | Body    |
| cg10789161 | RAP1B    | chr12 | 0.516198417 | + T2D risk | 5'UTR   |
| cg09887532 | ITPKB    | chr1  | 0.516287285 | + T2D risk | Body    |
| cg09402708 | KDM4B    | chr19 | 0.516369775 | - T2D risk | Body    |
| cg03338924 | PHACTR1  | chr6  | 0.516521627 | + T2D risk | Body    |
| cg00026412 | ANK3     | chr10 | 0.516691164 | - T2D risk | Body    |
| cg17636500 | ADCY5    | chr3  | 0.51676097  | + T2D risk | Body    |
| cg09924241 | ATP6V1H  | chr8  | 0.516781211 | - T2D risk | Body    |
| cg01193753 | SLIT3    | chr5  | 0.516834189 | + T2D risk | Body    |



|            |          |       |             |            |         |
|------------|----------|-------|-------------|------------|---------|
| cg20066677 | CHFR     | chr12 | 0.516942122 | - T2D risk | Body    |
| cg20765665 | DACH1    | chr13 | 0.516951676 | - T2D risk | Body    |
| cg13002170 | NCOA2    | chr8  | 0.516981673 | - T2D risk | Body    |
| cg09331533 | TANC2    | chr17 | 0.517134306 | - T2D risk | Body    |
| cg26083752 | LYVE1    | chr11 | 0.51713966  | - T2D risk | TSS1500 |
| cg24127061 | PACS1    | chr11 | 0.517196002 | - T2D risk | Body    |
| cg14445026 | KIAA0232 | chr4  | 0.517270244 | + T2D risk | Body    |
| cg20623215 | SLC30A8  | chr8  | 0.517319506 | - T2D risk | 5'UTR   |
| cg20623215 | SLC30A8  | chr8  | 0.517319506 | - T2D risk | TSS1500 |
| cg08243301 | KDM4B    | chr19 | 0.51747881  | + T2D risk | Body    |
| cg06761428 | PRKCE    | chr2  | 0.517550654 | - T2D risk | Body    |
| cg03301831 | RTN4     | chr2  | 0.517748204 | + T2D risk | Body    |
| cg04237618 | NGF      | chr1  | 0.517748711 | + T2D risk | 5'UTR   |
| cg10442572 | MGRN1    | chr16 | 0.517934323 | + T2D risk | Body    |
| cg11573321 | NCOA7    | chr6  | 0.517995343 | - T2D risk | 5'UTR   |
| cg11573321 | NCOA7    | chr6  | 0.517995343 | - T2D risk | Body    |
| cg03986218 | KIAA1217 | chr10 | 0.518065823 | + T2D risk | Body    |
| cg02404489 | MGRN1    | chr16 | 0.518173217 | + T2D risk | Body    |
| cg11811816 | CUX2     | chr12 | 0.518241516 | + T2D risk | Body    |
| cg16156021 | ST6GAL1  | chr3  | 0.518256884 | - T2D risk | 5'UTR   |
| cg24343007 | PICALM   | chr11 | 0.518351978 | + T2D risk | Body    |
| cg02968723 | KCNIP3   | chr2  | 0.518359783 | + T2D risk | Body    |
| cg03588267 | ATP6V1H  | chr8  | 0.518369084 | - T2D risk | Body    |
| cg26571127 | MAST1    | chr19 | 0.518448074 | - T2D risk | Body    |
| cg02972157 | PRKAG2   | chr7  | 0.518510515 | - T2D risk | Body    |
| cg09517926 | PRKAG2   | chr7  | 0.518632624 | - T2D risk | Body    |
| cg04283566 | RAP2A    | chr13 | 0.518710684 | - T2D risk | TSS1500 |
| cg09735140 | FAM160A1 | chr4  | 0.518730519 | - T2D risk | 5'UTR   |
| cg20441035 | ERC2     | chr3  | 0.51879179  | + T2D risk | 3'UTR   |
| cg07947315 | RSF1     | chr11 | 0.518801187 | - T2D risk | TSS1500 |
| cg17891146 | TSHZ1    | chr18 | 0.519030964 | - T2D risk | 5'UTR   |
| cg17891146 | TSHZ1    | chr18 | 0.519030964 | - T2D risk | Body    |
| cg18483526 | PRKCB    | chr16 | 0.519376003 | - T2D risk | Body    |
| cg24035035 | PRKAG2   | chr7  | 0.51937989  | - T2D risk | 5'UTR   |
| cg24035035 | PRKAG2   | chr7  | 0.51937989  | - T2D risk | Body    |
| cg09580882 | ITPKB    | chr1  | 0.51938141  | - T2D risk | Body    |
| cg27492103 | ASXL2    | chr2  | 0.519393644 | - T2D risk | Body    |
| cg02584678 | NOTCH3   | chr19 | 0.519438118 | - T2D risk | Body    |
| cg11614389 | SSBP2    | chr5  | 0.519447391 | - T2D risk | TSS200  |
| cg04093078 | TANC2    | chr17 | 0.519451028 | + T2D risk | Body    |
| cg17040092 | NCOA2    | chr8  | 0.519620791 | - T2D risk | Body    |
| cg06329892 | ANK3     | chr10 | 0.519630805 | + T2D risk | Body    |
| cg00703422 | ROBO2    | chr3  | 0.519822312 | - T2D risk | 5'UTR   |
| cg00703422 | ROBO2    | chr3  | 0.519822312 | - T2D risk | Body    |
| cg18724465 | PRKCB    | chr16 | 0.519926289 | + T2D risk | TSS1500 |
| cg11165254 | ERC2     | chr3  | 0.520045822 | + T2D risk | Body    |
| cg22604250 | ERC2     | chr3  | 0.520101346 | + T2D risk | 3'UTR   |
| cg18581355 | ARL15    | chr5  | 0.520186901 | - T2D risk | Body    |
| cg26880891 | ARIH1    | chr15 | 0.520229052 | - T2D risk | 1stExon |
| cg27453365 | NPAT     | chr11 | 0.520313823 | + T2D risk | Body    |
| cg22168287 | KIAA1217 | chr10 | 0.520331617 | - T2D risk | Body    |
| cg16964394 | RANBP17  | chr5  | 0.520348301 | - T2D risk | Body    |
| cg09860047 | RHBDD1   | chr2  | 0.520461271 | + T2D risk | Body    |
| cg26177915 | PACS2    | chr14 | 0.520465608 | - T2D risk | Body    |
| cg26177915 | PACS2    | chr14 | 0.520465608 | - T2D risk | 5'UTR   |
| cg13457498 | ANK3     | chr10 | 0.520692706 | - T2D risk | Body    |
| cg03147394 | NOL4     | chr18 | 0.520735144 | + T2D risk | Body    |
| cg02548323 | CUX1     | chr7  | 0.520769144 | - T2D risk | Body    |
| cg00978893 | BCAT1    | chr12 | 0.520866222 | + T2D risk | Body    |
| cg19462116 | DIP2C    | chr10 | 0.521058722 | + T2D risk | Body    |
| cg16850419 | RNF157   | chr17 | 0.521080026 | + T2D risk | TSS1500 |
| cg04652496 | RCAN2    | chr6  | 0.521113542 | - T2D risk | TSS1500 |
| cg12014181 | DIP2C    | chr10 | 0.521135602 | - T2D risk | Body    |
| cg02726883 | NF1      | chr17 | 0.521507791 | - T2D risk | TSS1500 |
| cg09462477 | PCYT1A   | chr3  | 0.521759546 | - T2D risk | TSS200  |
| cg07835234 | GRK5     | chr10 | 0.521776199 | - T2D risk | Body    |
| cg13742752 | CRYL1    | chr13 | 0.52186484  | - T2D risk | Body    |
| cg10781582 | KIAA1217 | chr10 | 0.522020788 | + T2D risk | TSS1500 |
| cg10781582 | KIAA1217 | chr10 | 0.522020788 | + T2D risk | 5'UTR   |
| cg10781582 | KIAA1217 | chr10 | 0.522020788 | + T2D risk | Body    |



|            |          |       |             |            |         |
|------------|----------|-------|-------------|------------|---------|
| cg01203773 | CLIC5    | chr6  | 0.522053404 | + T2D risk | Body    |
| cg04100243 | WDR48    | chr3  | 0.522074098 | + T2D risk | TSS1500 |
| cg00059879 | GALK2    | chr15 | 0.522089114 | - T2D risk | Body    |
| cg12835078 | PCYT1A   | chr3  | 0.522101473 | + T2D risk | Body    |
| cg25639341 | ANKHD1   | chr5  | 0.522233585 | - T2D risk | TSS1500 |
| cg24837397 | CUX1     | chr7  | 0.522385981 | + T2D risk | Body    |
| cg27599391 | NPAT     | chr11 | 0.522433917 | + T2D risk | Body    |
| cg17324804 | SLIT3    | chr5  | 0.522620433 | - T2D risk | Body    |
| cg18170385 | DIP2C    | chr10 | 0.522705449 | + T2D risk | Body    |
| cg15895233 | RET      | chr10 | 0.522721927 | + T2D risk | Body    |
| cg02725675 | ANK2     | chr4  | 0.522885804 | - T2D risk | Body    |
| cg24858140 | MTHFS    | chr15 | 0.522966491 | + T2D risk | 1stExon |
| cg02969677 | CLASP2   | chr3  | 0.523068877 | + T2D risk | Body    |
| cg04932056 | SPAG9    | chr17 | 0.523084775 | - T2D risk | TSS1500 |
| cg14410548 | CUX2     | chr12 | 0.523112393 | - T2D risk | Body    |
| cg13153318 | CLASP2   | chr3  | 0.523218156 | - T2D risk | Body    |
| cg13153318 | CLASP2   | chr3  | 0.523218156 | - T2D risk | ExonBnd |
| cg15755348 | CUX1     | chr7  | 0.523238687 | - T2D risk | Body    |
| cg15990629 | BCAT1    | chr12 | 0.523415571 | + T2D risk | Body    |
| cg27469563 | GNA12    | chr7  | 0.523555466 | + T2D risk | Body    |
| cg20498175 | PDE7A    | chr8  | 0.523588721 | + T2D risk | Body    |
| cg20114391 | CDH22    | chr20 | 0.523704178 | + T2D risk | Body    |
| cg00713286 | RAP1GAP2 | chr17 | 0.523726683 | + T2D risk | Body    |
| cg08921986 | ROBO2    | chr3  | 0.52374096  | - T2D risk | Body    |
| cg11955163 | INPP4A   | chr2  | 0.523834557 | - T2D risk | Body    |
| cg05078618 | KIAA1217 | chr10 | 0.523843774 | - T2D risk | Body    |
| cg18160302 | CADM1    | chr11 | 0.523950207 | + T2D risk | Body    |
| cg00032664 | SNX4     | chr3  | 0.523992226 | - T2D risk | Body    |
| cg22737241 | DIP2C    | chr10 | 0.524071073 | - T2D risk | Body    |
| cg15159625 | MAN1A2   | chr1  | 0.524161652 | - T2D risk | Body    |
| cg02652891 | PACRG    | chr6  | 0.524169544 | - T2D risk | Body    |
| cg00854324 | WWP2     | chr16 | 0.524378026 | + T2D risk | Body    |
| cg18205787 | CHID1    | chr11 | 0.524379727 | - T2D risk | TSS200  |
| cg14526021 | CUX1     | chr7  | 0.524555658 | + T2D risk | Body    |
| cg15024035 | COX6A1   | chr12 | 0.524577318 | - T2D risk | Body    |
| cg19156769 | PRKCB    | chr16 | 0.524617032 | + T2D risk | Body    |
| cg06410025 | PHACTR1  | chr6  | 0.52462766  | + T2D risk | Body    |
| cg14378958 | DIP2C    | chr10 | 0.524677258 | - T2D risk | Body    |
| cg09404592 | GAD1     | chr2  | 0.524732931 | - T2D risk | TSS1500 |
| cg06659019 | TENM2    | chr5  | 0.525049291 | - T2D risk | Body    |
| cg25778070 | MTHFS    | chr15 | 0.525229804 | + T2D risk | Body    |
| cg01524948 | ZHX2     | chr8  | 0.525266032 | + T2D risk | 5'UTR   |
| cg17430920 | PHACTR1  | chr6  | 0.525305773 | - T2D risk | Body    |
| cg19603966 | DNAJC1   | chr10 | 0.52534582  | - T2D risk | TSS200  |
| cg23445003 | CUX1     | chr7  | 0.525380801 | + T2D risk | Body    |
| cg13996514 | GRK5     | chr10 | 0.525424303 | + T2D risk | Body    |
| cg09999715 | ARL15    | chr5  | 0.52550964  | - T2D risk | Body    |
| cg26894278 | CRYL1    | chr13 | 0.525624219 | + T2D risk | Body    |
| cg16433800 | PDK1     | chr2  | 0.525777502 | - T2D risk | 1stExon |
| cg16433800 | PDK1     | chr2  | 0.525777502 | - T2D risk | 5'UTR   |
| cg10612065 | KDM4B    | chr19 | 0.525904559 | + T2D risk | Body    |
| cg14166189 | CHID1    | chr11 | 0.525915234 | - T2D risk | TSS1500 |
| cg10659216 | PACS1    | chr11 | 0.525949696 | - T2D risk | 1stExon |
| cg08036796 | KDM4B    | chr19 | 0.525967237 | - T2D risk | Body    |
| cg07286060 | SPOCK1   | chr5  | 0.525976831 | + T2D risk | Body    |
| cg23494444 | TTC28    | chr22 | 0.525990554 | + T2D risk | Body    |
| cg08082763 | CLEC16A  | chr16 | 0.526011744 | - T2D risk | Body    |
| cg26413827 | DACH1    | chr13 | 0.526157173 | - T2D risk | 5'UTR   |
| cg26413827 | DACH1    | chr13 | 0.526157173 | - T2D risk | 1stExon |
| cg13372900 | ANK3     | chr10 | 0.526266578 | - T2D risk | Body    |
| cg26875813 | COL4A1   | chr13 | 0.526622757 | + T2D risk | Body    |
| cg23662892 | HMBX1    | chr8  | 0.526712595 | + T2D risk | 5'UTR   |
| cg10992339 | ATP8A1   | chr4  | 0.526895923 | - T2D risk | Body    |
| cg24542643 | EFR3A    | chr8  | 0.526901739 | - T2D risk | TSS1500 |
| cg03899654 | AGPAT3   | chr21 | 0.527059284 | + T2D risk | 5'UTR   |
| cg02904605 | NOTCH3   | chr19 | 0.527079424 | + T2D risk | Body    |
| cg16546717 | GNA12    | chr7  | 0.527323683 | - T2D risk | Body    |
| cg06713769 | LYVE1    | chr11 | 0.527374774 | + T2D risk | Body    |
| cg26311944 | TSC22D1  | chr13 | 0.527377471 | + T2D risk | Body    |
| cg14248352 | CNTNAP2  | chr7  | 0.527503613 | - T2D risk | Body    |



|               |          |       |             |            |         |
|---------------|----------|-------|-------------|------------|---------|
| cg00924094    | LMCD1    | chr3  | 0.527543971 | - T2D risk | Body    |
| cg04857026    | PACS2    | chr14 | 0.527724077 | + T2D risk | Body    |
| cg07541610    | CALD1    | chr7  | 0.527744315 | - T2D risk | Body    |
| cg12015310    | MEIS2    | chr15 | 0.527746111 | - T2D risk | 5'UTR   |
| cg12015310    | MEIS2    | chr15 | 0.527746111 | - T2D risk | 1stExon |
| cg12015310    | MEIS2    | chr15 | 0.527746111 | - T2D risk | TSS1500 |
| cg08103074    | NGLY1    | chr3  | 0.527817039 | + T2D risk | Body    |
| cg04071866    | MGRN1    | chr16 | 0.52789538  | - T2D risk | Body    |
| cg19872814    | IFT74    | chr9  | 0.527975536 | - T2D risk | 5'UTR   |
| cg03585389    | DIP2C    | chr10 | 0.528012758 | - T2D risk | Body    |
| cg13971793    | NQO1     | chr16 | 0.528032848 | + T2D risk | TSS1500 |
| cg15988693    | CLASP2   | chr3  | 0.528080448 | + T2D risk | TSS200  |
| cg03072586    | ATXN1    | chr6  | 0.528095772 | + T2D risk | 5'UTR   |
| cg06246474    | CUX1     | chr7  | 0.528143483 | - T2D risk | Body    |
| cg25244420    | PRKAG2   | chr7  | 0.528167612 | + T2D risk | Body    |
| cg09983140    | DIP2C    | chr10 | 0.528400942 | - T2D risk | Body    |
| cg03310779    | KDM4B    | chr19 | 0.528448225 | + T2D risk | Body    |
| cg04727043    | PTPRU    | chr1  | 0.528497743 | - T2D risk | Body    |
| cg07442487    | SLIT3    | chr5  | 0.52860724  | + T2D risk | Body    |
| cg17444972    | RSF1     | chr11 | 0.528615686 | + T2D risk | Body    |
| cg05048426    | PACS2    | chr14 | 0.528653691 | + T2D risk | Body    |
| cg16463964    | CMTR1    | chr6  | 0.528691831 | + T2D risk | Body    |
| cg09465494    | ERC2     | chr3  | 0.528813802 | + T2D risk | Body    |
| cg19592720    | KCNIP3   | chr2  | 0.528815799 | + T2D risk | Body    |
| cg26076846    | TANC2    | chr17 | 0.528830956 | - T2D risk | Body    |
| cg02710892    | TENM2    | chr5  | 0.528883002 | + T2D risk | Body    |
| cg09246611    | DIP2C    | chr10 | 0.528957119 | + T2D risk | Body    |
| cg16118148    | MGRN1    | chr16 | 0.529060064 | - T2D risk | Body    |
| cg13600622    | LMX1B    | chr9  | 0.529060899 | + T2D risk | Body    |
| cg21738971    | UXS1     | chr2  | 0.529130397 | - T2D risk | TSS200  |
| cg06435786    | INPP4A   | chr2  | 0.529176477 | - T2D risk | 5'UTR   |
| cg10193817    | CADM1    | chr11 | 0.529226822 | - T2D risk | 5'UTR   |
| cg10193817    | CADM1    | chr11 | 0.529226822 | - T2D risk | 1stExon |
| cg25496760    | CLEC16A  | chr16 | 0.529287976 | + T2D risk | Body    |
| cg25496760    | CLEC16A  | chr16 | 0.529287976 | + T2D risk | ExonBnd |
| cg24847829    | SPOCK1   | chr5  | 0.529352378 | - T2D risk | 5'UTR   |
| cg03212768    | ANK3     | chr10 | 0.52960129  | - T2D risk | Body    |
| cg07520586    | RAP1GAP2 | chr17 | 0.529703022 | - T2D risk | Body    |
| cg06258595    | MGRN1    | chr16 | 0.529785162 | - T2D risk | Body    |
| cg04772620    | PDLIM5   | chr4  | 0.529874889 | + T2D risk | 5'UTR   |
| cg04772620    | PDLIM5   | chr4  | 0.529874889 | + T2D risk | Body    |
| cg11032145    | APBA1    | chr9  | 0.529883733 | + T2D risk | 3'UTR   |
| cg00795205    | PRKCB    | chr16 | 0.529960331 | + T2D risk | Body    |
| cg06746009    | CUX1     | chr7  | 0.530010201 | + T2D risk | Body    |
| cg03696852    | WWP2     | chr16 | 0.530013805 | - T2D risk | Body    |
| cg12702941    | PRKCE    | chr2  | 0.530062507 | + T2D risk | 3'UTR   |
| cg00367499    | RANBP17  | chr5  | 0.530111139 | + T2D risk | Body    |
| cg17496602    | CREBBP   | chr16 | 0.530159097 | + T2D risk | Body    |
| cg04578258    | CNTNAP2  | chr7  | 0.53033771  | + T2D risk | Body    |
| cg05758010    | SSBP2    | chr5  | 0.530365866 | + T2D risk | 5'UTR   |
| cg05758010    | SSBP2    | chr5  | 0.530365866 | + T2D risk | 1stExon |
| cg06719495    | SEC31A   | chr4  | 0.530376642 | - T2D risk | Body    |
| cg11580199    | KIAA1217 | chr10 | 0.530379371 | - T2D risk | TSS200  |
| cg11580199    | KIAA1217 | chr10 | 0.530379371 | - T2D risk | Body    |
| cg07863043    | APC      | chr5  | 0.530382229 | + T2D risk | Body    |
| cg24058116    | TSHZ1    | chr18 | 0.530575638 | + T2D risk | 5'UTR   |
| cg24058116    | TSHZ1    | chr18 | 0.530575638 | + T2D risk | Body    |
| cg01509920    | RAP1B    | chr12 | 0.53079711  | - T2D risk | 5'UTR   |
| cg08251176    | ATP6V1A  | chr3  | 0.530914929 | - T2D risk | TSS1500 |
| cg08789073    | ZHX2     | chr8  | 0.530922974 | - T2D risk | Body    |
| cg18262079    | TJP1     | chr15 | 0.531108189 | - T2D risk | TSS1500 |
| cg18262079    | TJP1     | chr15 | 0.531108189 | - T2D risk | 5'UTR   |
| cg18262079    | TJP1     | chr15 | 0.531108189 | - T2D risk | Body    |
| cg18262079    | TJP1     | chr15 | 0.531108189 | - T2D risk | 1stExon |
| cg24523250    | RGS7     | chr1  | 0.531120123 | - T2D risk | Body    |
| cg27227804    | CLEC16A  | chr16 | 0.53135572  | + T2D risk | Body    |
| cg15020645    | APC      | chr5  | 0.531388436 | - T2D risk | 5'UTR   |
| cg07366670    | CUX2     | chr12 | 0.531438166 | + T2D risk | Body    |
| ch.11.942842R | PHF21A   | chr11 | 0.531581827 | - T2D risk | Body    |
| cg02626991    | NGF      | chr1  | 0.531634473 | + T2D risk | Body    |



|            |                 |       |             |            |         |
|------------|-----------------|-------|-------------|------------|---------|
| cg02216795 | <i>PHACTR1</i>  | chr6  | 0.531636389 | + T2D risk | Body    |
| cg15625618 | <i>MMS19</i>    | chr10 | 0.531687175 | - T2D risk | Body    |
| cg25681060 | <i>SEZ6L</i>    | chr22 | 0.531800532 | + T2D risk | Body    |
| cg10318661 | <i>GRK5</i>     | chr10 | 0.531814469 | - T2D risk | Body    |
| cg11447650 | <i>CNTNAP2</i>  | chr7  | 0.531956831 | + T2D risk | Body    |
| cg05398587 | <i>DENND4C</i>  | chr9  | 0.53197378  | + T2D risk | Body    |
| cg23362669 | <i>UXS1</i>     | chr2  | 0.531995455 | + T2D risk | Body    |
| cg05637360 | <i>PPFIBP1</i>  | chr12 | 0.532156748 | - T2D risk | Body    |
| cg01064048 | <i>KIAA0232</i> | chr4  | 0.532261853 | + T2D risk | Body    |
| cg23127694 | <i>GRK5</i>     | chr10 | 0.532319048 | - T2D risk | Body    |
| cg25691775 | <i>RAP1GAP2</i> | chr17 | 0.532322448 | + T2D risk | TSS1500 |
| cg15199594 | <i>TENM2</i>    | chr5  | 0.532596424 | + T2D risk | TSS1500 |
| cg00966672 | <i>AGPAT3</i>   | chr21 | 0.532730794 | - T2D risk | 5'UTR   |
| cg02284194 | <i>ACSS2</i>    | chr20 | 0.533170826 | + T2D risk | Body    |
| cg02284194 | <i>ACSS2</i>    | chr20 | 0.533170826 | + T2D risk | 5'UTR   |
| cg02284194 | <i>ACSS2</i>    | chr20 | 0.533170826 | + T2D risk | 1stExon |
| cg24056874 | <i>SEC31A</i>   | chr4  | 0.53318886  | - T2D risk | Body    |
| cg14796565 | <i>CHID1</i>    | chr11 | 0.533427522 | - T2D risk | TSS1500 |
| cg14796565 | <i>CHID1</i>    | chr11 | 0.533427522 | - T2D risk | 5'UTR   |
| cg00713247 | <i>DIP2C</i>    | chr10 | 0.533510051 | - T2D risk | Body    |
| cg26678187 | <i>NGF</i>      | chr1  | 0.533810349 | + T2D risk | 3'UTR   |
| cg07329239 | <i>PRKCE</i>    | chr2  | 0.534119023 | + T2D risk | Body    |
| cg09097668 | <i>RHOA</i>     | chr3  | 0.534137121 | - T2D risk | 5'UTR   |
| cg08301254 | <i>CUX2</i>     | chr12 | 0.53418317  | + T2D risk | Body    |
| cg12076945 | <i>RAP1B</i>    | chr12 | 0.534313188 | - T2D risk | 5'UTR   |
| cg23532924 | <i>DDC</i>      | chr7  | 0.534357369 | + T2D risk | TSS1500 |
| cg19242397 | <i>CTR9</i>     | chr11 | 0.53464357  | + T2D risk | Body    |
| cg13244293 | <i>OXSM</i>     | chr3  | 0.534698476 | - T2D risk | Body    |
| cg13244293 | <i>OXSM</i>     | chr3  | 0.534698476 | - T2D risk | 5'UTR   |
| cg13244293 | <i>NGLY1</i>    | chr3  | 0.534698476 | - T2D risk | TSS1500 |
| cg22199628 | <i>PPP1R12A</i> | chr12 | 0.534745061 | - T2D risk | Body    |
| cg12058096 | <i>CUX2</i>     | chr12 | 0.534760896 | + T2D risk | Body    |
| cg25189108 | <i>DIP2C</i>    | chr10 | 0.534826747 | - T2D risk | Body    |
| cg15353666 | <i>DNAJC1</i>   | chr10 | 0.534965312 | + T2D risk | Body    |
| cg24459984 | <i>ERC2</i>     | chr3  | 0.535003384 | - T2D risk | Body    |
| cg18801028 | <i>PTPRU</i>    | chr1  | 0.535055704 | + T2D risk | Body    |
| cg14624444 | <i>PHACTR1</i>  | chr6  | 0.535097831 | + T2D risk | Body    |
| cg02108620 | <i>ULK4</i>     | chr3  | 0.535108731 | + T2D risk | 5'UTR   |
| cg06225605 | <i>CNTNAP2</i>  | chr7  | 0.535244209 | + T2D risk | Body    |
| cg00644629 | <i>PTPRU</i>    | chr1  | 0.535259531 | + T2D risk | Body    |
| cg06152383 | <i>GNA12</i>    | chr7  | 0.535383645 | - T2D risk | TSS1500 |
| cg14872684 | <i>GRK5</i>     | chr10 | 0.535516465 | + T2D risk | Body    |
| cg01595870 | <i>PLAGL1</i>   | chr6  | 0.535541242 | - T2D risk | TSS1500 |
| cg15182613 | <i>RAP1GAP2</i> | chr17 | 0.535563261 | + T2D risk | Body    |
| cg06979656 | <i>MET</i>      | chr7  | 0.535695376 | + T2D risk | Body    |
| cg15315418 | <i>ROBO2</i>    | chr3  | 0.535743788 | - T2D risk | 5'UTR   |
| cg15315418 | <i>ROBO2</i>    | chr3  | 0.535743788 | - T2D risk | TSS1500 |
| cg15315418 | <i>ROBO2</i>    | chr3  | 0.535743788 | - T2D risk | Body    |
| cg11602897 | <i>CUX2</i>     | chr12 | 0.535943698 | - T2D risk | Body    |
| cg07448800 | <i>TENM2</i>    | chr5  | 0.536062111 | - T2D risk | Body    |
| cg04697208 | <i>PRKAG2</i>   | chr7  | 0.536066115 | - T2D risk | Body    |
| cg03815117 | <i>ENAH</i>     | chr1  | 0.536074733 | + T2D risk | 3'UTR   |
| cg23847069 | <i>RAP1GAP2</i> | chr17 | 0.536110183 | - T2D risk | Body    |
| cg23717689 | <i>SLIT3</i>    | chr5  | 0.536151651 | + T2D risk | Body    |
| cg12438666 | <i>TSGA10</i>   | chr2  | 0.53616506  | - T2D risk | 5'UTR   |
| cg10732689 | <i>TSHZ1</i>    | chr18 | 0.536256    | - T2D risk | 5'UTR   |
| cg10732689 | <i>TSHZ1</i>    | chr18 | 0.536256    | - T2D risk | Body    |
| cg04301322 | <i>CUL1</i>     | chr7  | 0.536321441 | + T2D risk | 5'UTR   |
| cg10857271 | <i>ATP6V1A</i>  | chr3  | 0.536328222 | + T2D risk | TSS1500 |
| cg07438751 | <i>TENM2</i>    | chr5  | 0.536468138 | - T2D risk | Body    |
| cg01813276 | <i>GLA</i>      | chrX  | 0.536472099 | - T2D risk | Body    |
| cg00391352 | <i>SLC29A4</i>  | chr7  | 0.536501625 | + T2D risk | Body    |
| cg23287442 | <i>TMEM150C</i> | chr4  | 0.53653165  | - T2D risk | Body    |
| cg14191654 | <i>CDH22</i>    | chr20 | 0.536674229 | - T2D risk | Body    |
| cg26188389 | <i>SLIT3</i>    | chr5  | 0.536715695 | - T2D risk | Body    |
| cg25900163 | <i>EFR3A</i>    | chr8  | 0.537060634 | + T2D risk | Body    |
| cg09607548 | <i>JPH2</i>     | chr20 | 0.537092848 | + T2D risk | Body    |
| cg02723107 | <i>KDR</i>      | chr4  | 0.537093614 | - T2D risk | Body    |
| cg10551649 | <i>CHID1</i>    | chr11 | 0.537124054 | + T2D risk | TSS1500 |
| cg10551649 | <i>CHID1</i>    | chr11 | 0.537124054 | + T2D risk | 5'UTR   |



|               |          |       |             |            |         |
|---------------|----------|-------|-------------|------------|---------|
| cg17420659    | NPAT     | chr11 | 0.537247163 | + T2D risk | Body    |
| cg08238568    | RGS7     | chr1  | 0.537302566 | - T2D risk | Body    |
| cg22276692    | DLL4     | chr15 | 0.537451279 | + T2D risk | TSS200  |
| cg13868109    | PACRG    | chr6  | 0.537464666 | + T2D risk | Body    |
| cg04543413    | BCAT1    | chr12 | 0.537498489 | + T2D risk | Body    |
| cg13423469    | ATRNL1   | chr10 | 0.537527595 | + T2D risk | Body    |
| cg13011713    | DNAJC13  | chr3  | 0.537530899 | - T2D risk | Body    |
| cg05660670    | PDE3A    | chr12 | 0.537546999 | + T2D risk | TSS1500 |
| cg01363648    | PTPRU    | chr1  | 0.537613442 | + T2D risk | Body    |
| cg17014647    | ATXN1    | chr6  | 0.537682959 | - T2D risk | 5'UTR   |
| cg13264765    | APC      | chr5  | 0.537724708 | + T2D risk | Body    |
| cg09253125    | TPCN1    | chr12 | 0.537745219 | + T2D risk | TSS1500 |
| cg24953670    | CDK8     | chr13 | 0.537768171 | + T2D risk | Body    |
| cg01670430    | GNA12    | chr7  | 0.537818855 | - T2D risk | Body    |
| cg14157175    | APBA1    | chr9  | 0.537970547 | - T2D risk | Body    |
| cg23835971    | TTC28    | chr22 | 0.538030972 | - T2D risk | Body    |
| cg11101800    | PLEKHG3  | chr14 | 0.538123162 | + T2D risk | TSS200  |
| cg15603766    | ST20     | chr15 | 0.53825798  | - T2D risk | 1stExon |
| cg15603766    | ST20     | chr15 | 0.53825798  | - T2D risk | 5'UTR   |
| cg15603766    | ST20     | chr15 | 0.53825798  | - T2D risk | Body    |
| cg11482716    | ARL8B    | chr3  | 0.538464568 | - T2D risk | TSS1500 |
| cg03383322    | ADCY5    | chr3  | 0.538534845 | + T2D risk | Body    |
| cg07317944    | TSC22D1  | chr13 | 0.538544572 | + T2D risk | Body    |
| cg07317944    | TSC22D1  | chr13 | 0.538544572 | + T2D risk | 5'UTR   |
| cg03683666    | CMTR1    | chr6  | 0.538575174 | + T2D risk | Body    |
| cg25468723    | SEZ6L    | chr22 | 0.538688476 | - T2D risk | Body    |
| cg19736369    | MAST1    | chr19 | 0.538718412 | + T2D risk | Body    |
| cg05005968    | DIP2C    | chr10 | 0.538769031 | - T2D risk | Body    |
| cg03346852    | NUP98    | chr11 | 0.538903596 | - T2D risk | Body    |
| cg13296555    | GRK5     | chr10 | 0.53904823  | + T2D risk | Body    |
| cg02245391    | TENM2    | chr5  | 0.539093178 | - T2D risk | Body    |
| cg16331867    | ACSS2    | chr20 | 0.539259495 | + T2D risk | Body    |
| cg25069772    | PHACTR1  | chr6  | 0.539319092 | + T2D risk | Body    |
| cg25663171    | TENM2    | chr5  | 0.539339453 | + T2D risk | Body    |
| cg04908625    | ADCY5    | chr3  | 0.539411803 | - T2D risk | 1stExon |
| cg00588047    | RGS7     | chr1  | 0.53952606  | - T2D risk | Body    |
| cg18577214    | NUP98    | chr11 | 0.539581726 | - T2D risk | TSS1500 |
| cg25113008    | RAP1B    | chr12 | 0.539628744 | - T2D risk | Body    |
| cg01970726    | LMCD1    | chr3  | 0.539902518 | - T2D risk | 3'UTR   |
| cg06659727    | COL4A1   | chr13 | 0.539944618 | - T2D risk | 1stExon |
| cg06659727    | COL4A1   | chr13 | 0.539944618 | - T2D risk | 5'UTR   |
| cg12489915    | SPAG9    | chr17 | 0.539966221 | + T2D risk | Body    |
| cg16363189    | SCAF8    | chr6  | 0.539996537 | - T2D risk | Body    |
| cg12070069    | PHACTR1  | chr6  | 0.540014129 | + T2D risk | TSS1500 |
| cg11057604    | KIAA0355 | chr19 | 0.540080469 | + T2D risk | Body    |
| cg14097373    | MDM1     | chr12 | 0.540110335 | + T2D risk | TSS1500 |
| cg00887994    | PACS2    | chr14 | 0.540117287 | + T2D risk | Body    |
| cg12653327    | ERC2     | chr3  | 0.54020179  | - T2D risk | 3'UTR   |
| cg07676324    | ANKHD1   | chr5  | 0.540239114 | + T2D risk | TSS1500 |
| cg10818446    | ZDHHC2   | chr8  | 0.540564595 | - T2D risk | Body    |
| cg03229959    | DDHD2    | chr8  | 0.540666095 | + T2D risk | 5'UTR   |
| cg03229959    | DDHD2    | chr8  | 0.540666095 | + T2D risk | 1stExon |
| cg13340442    | PRKCE    | chr2  | 0.540795835 | + T2D risk | Body    |
| cg07095384    | NCOA7    | chr6  | 0.540800131 | - T2D risk | 5'UTR   |
| cg07095384    | NCOA7    | chr6  | 0.540800131 | - T2D risk | Body    |
| cg21272956    | PRKACB   | chr1  | 0.54081432  | - T2D risk | Body    |
| cg18116815    | RCAN2    | chr6  | 0.54106954  | - T2D risk | Body    |
| cg12715330    | ST6GAL1  | chr3  | 0.54112027  | - T2D risk | 5'UTR   |
| cg22369266    | PCYT1A   | chr3  | 0.541148302 | - T2D risk | ExonBnd |
| cg22369266    | PCYT1A   | chr3  | 0.541148302 | - T2D risk | Body    |
| cg24517837    | TENM2    | chr5  | 0.541242132 | + T2D risk | Body    |
| cg24603152    | PRKACB   | chr1  | 0.541309779 | - T2D risk | TSS1500 |
| cg22826038    | GRK5     | chr10 | 0.541460953 | - T2D risk | Body    |
| cg02892577    | GRK5     | chr10 | 0.541517932 | - T2D risk | Body    |
| cg09806966    | WWP2     | chr16 | 0.541577157 | - T2D risk | 3'UTR   |
| cg09806966    | WWP2     | chr16 | 0.541577157 | - T2D risk | Body    |
| ch.11.150171F | NUP98    | chr11 | 0.541580648 | + T2D risk | Body    |
| cg20442224    | TMEM131  | chr2  | 0.541640604 | - T2D risk | Body    |
| cg22612642    | SPOCK1   | chr5  | 0.541661159 | - T2D risk | 3'UTR   |
| cg06722216    | NOL4     | chr18 | 0.541787299 | + T2D risk | 1stExon |



|               |          |       |             |            |         |
|---------------|----------|-------|-------------|------------|---------|
| cg15252599    | TANC2    | chr17 | 0.541969323 | - T2D risk | Body    |
| cg23882186    | INPP4A   | chr2  | 0.541970743 | + T2D risk | 5'UTR   |
| cg18346182    | DIP2C    | chr10 | 0.541999064 | - T2D risk | Body    |
| cg00668174    | ASH1L    | chr1  | 0.542007606 | + T2D risk | 5'UTR   |
| cg26064307    | TENM2    | chr5  | 0.542120627 | - T2D risk | Body    |
| cg20382695    | ATRNL1   | chr10 | 0.542336459 | - T2D risk | Body    |
| cg19334176    | DIP2C    | chr10 | 0.542345478 | - T2D risk | Body    |
| cg14278774    | FNIP2    | chr4  | 0.54237893  | + T2D risk | Body    |
| cg10451116    | MEIS2    | chr15 | 0.5425392   | - T2D risk | Body    |
| cg03865213    | KIAA1217 | chr10 | 0.542565746 | + T2D risk | Body    |
| cg25218521    | TSC22D1  | chr13 | 0.542737841 | - T2D risk | Body    |
| cg27466022    | FAM160A1 | chr4  | 0.542767067 | + T2D risk | Body    |
| cg05201958    | ANK3     | chr10 | 0.542900433 | - T2D risk | Body    |
| cg09698846    | ZHX2     | chr8  | 0.543000284 | + T2D risk | Body    |
| cg02765913    | BCAT1    | chr12 | 0.543005371 | + T2D risk | 5'UTR   |
| cg02765913    | BCAT1    | chr12 | 0.543005371 | + T2D risk | 1stExon |
| cg16007063    | DDC      | chr7  | 0.543135537 | + T2D risk | Body    |
| cg25257044    | ITGA1    | chr5  | 0.543143226 | + T2D risk | Body    |
| cg08949364    | WWP2     | chr16 | 0.543243471 | + T2D risk | TSS1500 |
| cg08949364    | WWP2     | chr16 | 0.543243471 | + T2D risk | Body    |
| cg16086016    | EVI5     | chr1  | 0.543302458 | + T2D risk | TSS1500 |
| cg08502856    | PDE8A    | chr15 | 0.543382276 | - T2D risk | TSS200  |
| cg08502856    | PDE8A    | chr15 | 0.543382276 | - T2D risk | TSS1500 |
| cg03382226    | GALK2    | chr15 | 0.543482531 | - T2D risk | Body    |
| cg03565153    | PHACTR1  | chr6  | 0.543523912 | - T2D risk | Body    |
| cg14022840    | RGS7     | chr1  | 0.543594223 | - T2D risk | Body    |
| cg21389456    | DIP2C    | chr10 | 0.543809676 | - T2D risk | Body    |
| cg04305963    | SKAP1    | chr17 | 0.543923602 | - T2D risk | Body    |
| cg22502704    | PHF21A   | chr11 | 0.544047035 | + T2D risk | 5'UTR   |
| cg13517826    | KDM4B    | chr19 | 0.544053212 | + T2D risk | Body    |
| cg02366856    | MEIS2    | chr15 | 0.544079343 | - T2D risk | Body    |
| cg10740500    | MMS19    | chr10 | 0.544242171 | - T2D risk | ExonBnd |
| cg10740500    | MMS19    | chr10 | 0.544242171 | - T2D risk | Body    |
| cg09411975    | PACS1    | chr11 | 0.544382385 | + T2D risk | Body    |
| cg04801795    | RSF1     | chr11 | 0.544400869 | - T2D risk | Body    |
| cg16803124    | DIP2C    | chr10 | 0.544463491 | - T2D risk | Body    |
| cg18141431    | HMBX1    | chr8  | 0.544775245 | - T2D risk | 5'UTR   |
| cg24589102    | ATRN     | chr20 | 0.544780137 | + T2D risk | Body    |
| cg12520276    | DIP2C    | chr10 | 0.544856524 | + T2D risk | Body    |
| cg22267941    | PDE8A    | chr15 | 0.544866627 | + T2D risk | TSS1500 |
| cg16050957    | RBBP6    | chr16 | 0.544927437 | - T2D risk | TSS200  |
| cg23310936    | UXS1     | chr2  | 0.545061233 | + T2D risk | Body    |
| cg14668632    | GNA12    | chr7  | 0.54508548  | + T2D risk | Body    |
| cg16466485    | PRKACB   | chr1  | 0.545196536 | + T2D risk | Body    |
| cg01948390    | SVIP     | chr11 | 0.545201897 | - T2D risk | Body    |
| cg19416470    | MEIS2    | chr15 | 0.545361961 | + T2D risk | 5'UTR   |
| cg19416470    | MEIS2    | chr15 | 0.545361961 | + T2D risk | TSS1500 |
| cg00456950    | ITGB1    | chr10 | 0.545450726 | + T2D risk | TSS1500 |
| cg00456950    | ITGB1    | chr10 | 0.545450726 | + T2D risk | 5'UTR   |
| cg06419562    | PRKCB    | chr16 | 0.545451634 | - T2D risk | Body    |
| cg11050527    | ATP6V1H  | chr8  | 0.545453192 | + T2D risk | 5'UTR   |
| cg11050527    | ATP6V1H  | chr8  | 0.545453192 | + T2D risk | 1stExon |
| cg00718452    | ARID2    | chr12 | 0.545551226 | + T2D risk | 3'UTR   |
| cg12578615    | CPLX2    | chr5  | 0.54564265  | + T2D risk | 5'UTR   |
| cg05793240    | GNA12    | chr7  | 0.545645971 | + T2D risk | Body    |
| cg26293014    | NCOA7    | chr6  | 0.545670929 | + T2D risk | Body    |
| cg02706205    | GALK2    | chr15 | 0.545774478 | + T2D risk | TSS200  |
| ch.15.607847R | GALK2    | chr15 | 0.545917626 | + T2D risk | Body    |
| cg03150082    | ENAH     | chr1  | 0.546072651 | + T2D risk | Body    |
| cg19856701    | NF1      | chr17 | 0.546094965 | + T2D risk | 3'UTR   |
| cg19856701    | NF1      | chr17 | 0.546094965 | + T2D risk | Body    |
| cg18288907    | SCAF8    | chr6  | 0.546173019 | + T2D risk | Body    |
| cg03721109    | CRYL1    | chr13 | 0.546310886 | + T2D risk | Body    |
| cg23338195    | SLC30A8  | chr8  | 0.546326954 | - T2D risk | TSS1500 |
| cg23924939    | POLA1    | chrX  | 0.546345646 | + T2D risk | Body    |
| cg07554478    | ATP6V1A  | chr3  | 0.546355239 | - T2D risk | 5'UTR   |
| cg17682255    | PDE7A    | chr8  | 0.546386294 | + T2D risk | Body    |
| cg23340034    | ST6GAL1  | chr3  | 0.546622671 | - T2D risk | Body    |
| cg15019644    | ENAH     | chr1  | 0.546856779 | - T2D risk | Body    |
| cg11638352    | PDE8A    | chr15 | 0.546860796 | - T2D risk | 5'UTR   |



|               |          |       |             |            |         |
|---------------|----------|-------|-------------|------------|---------|
| cg11638352    | PDE8A    | chr15 | 0.546860796 | - T2D risk | Body    |
| cg00153831    | TSHZ1    | chr18 | 0.546865086 | + T2D risk | 5'UTR   |
| cg00153831    | TSHZ1    | chr18 | 0.546865086 | + T2D risk | Body    |
| cg25260582    | AMD1     | chr6  | 0.546948279 | + T2D risk | 5'UTR   |
| cg08635011    | CUX2     | chr12 | 0.547062716 | - T2D risk | Body    |
| cg02646615    | ERC2     | chr3  | 0.547181621 | - T2D risk | 5'UTR   |
| cg01955214    | PLEKHG3  | chr14 | 0.547226708 | + T2D risk | 5'UTR   |
| cg24175288    | NCOA7    | chr6  | 0.547375683 | + T2D risk | 5'UTR   |
| cg25622597    | RHOA     | chr3  | 0.547381131 | + T2D risk | 1stExon |
| cg25622597    | RHOA     | chr3  | 0.547381131 | + T2D risk | 5'UTR   |
| cg23587915    | ZHX2     | chr8  | 0.547390219 | - T2D risk | 5'UTR   |
| cg07872115    | TTC28    | chr22 | 0.547432782 | + T2D risk | Body    |
| cg15436936    | SCAF8    | chr6  | 0.547627131 | + T2D risk | Body    |
| cg21113768    | PLAGL1   | chr6  | 0.547698547 | + T2D risk | TSS1500 |
| cg12844290    | CUX2     | chr12 | 0.5477917   | - T2D risk | Body    |
| cg00904723    | ATP6V1A  | chr3  | 0.547792189 | - T2D risk | ExonBnd |
| cg00904723    | ATP6V1A  | chr3  | 0.547792189 | - T2D risk | Body    |
| cg24844230    | CHFR     | chr12 | 0.547812795 | + T2D risk | Body    |
| cg21460095    | SLIT3    | chr5  | 0.547823461 | - T2D risk | Body    |
| cg15430525    | ARIH1    | chr15 | 0.547853729 | - T2D risk | Body    |
| cg20884241    | CUX1     | chr7  | 0.548166563 | + T2D risk | Body    |
| cg19083007    | RCAN2    | chr6  | 0.548405666 | + T2D risk | TSS1500 |
| cg06969479    | TMEM131  | chr2  | 0.548465411 | + T2D risk | Body    |
| cg10116636    | KIAA1217 | chr10 | 0.548636764 | - T2D risk | 5'UTR   |
| cg02203055    | SPOCK1   | chr5  | 0.548744455 | + T2D risk | Body    |
| cg09009074    | LMCD1    | chr3  | 0.548770911 | - T2D risk | TSS200  |
| cg03340398    | SLC7A2   | chr8  | 0.548789401 | + T2D risk | 5'UTR   |
| cg18762488    | MET      | chr7  | 0.548811268 | + T2D risk | Body    |
| cg16125666    | CLOCK    | chr4  | 0.548953969 | - T2D risk | TSS1500 |
| cg03670115    | DYNC1I2  | chr2  | 0.54896057  | + T2D risk | 5'UTR   |
| cg03670115    | DYNC1I2  | chr2  | 0.54896057  | + T2D risk | 1stExon |
| cg12580389    | SLIT3    | chr5  | 0.549028517 | + T2D risk | Body    |
| cg08027238    | MYO6     | chr6  | 0.549234215 | + T2D risk | 5'UTR   |
| cg06909274    | ITPKB    | chr1  | 0.549246407 | + T2D risk | Body    |
| ch.11.152092R | NUP98    | chr11 | 0.549323303 | - T2D risk | Body    |
| cg02650170    | TENM2    | chr5  | 0.549360923 | - T2D risk | Body    |
| cg16250093    | MGRN1    | chr16 | 0.549385057 | - T2D risk | Body    |
| cg13447009    | TTC28    | chr22 | 0.549466328 | + T2D risk | Body    |
| cg11478896    | GNA12    | chr7  | 0.549497997 | - T2D risk | Body    |
| cg18243357    | ERC2     | chr3  | 0.549539427 | - T2D risk | 3'UTR   |
| cg25863391    | DDC      | chr7  | 0.549574611 | - T2D risk | 5'UTR   |
| cg06021990    | FLT1     | chr13 | 0.549690755 | - T2D risk | Body    |
| cg18633693    | KIAA1217 | chr10 | 0.549723224 | - T2D risk | TSS1500 |
| cg08212266    | CUX1     | chr7  | 0.549833678 | + T2D risk | Body    |
| cg25366903    | ATP8A2   | chr13 | 0.549942058 | + T2D risk | Body    |
| cg05141089    | PDE5A    | chr4  | 0.550037648 | - T2D risk | TSS200  |
| cg05141089    | PDE5A    | chr4  | 0.550037648 | - T2D risk | TSS1500 |
| cg15192909    | ATP4A    | chr19 | 0.550212188 | + T2D risk | Body    |
| cg09327847    | PRKCB    | chr16 | 0.55030494  | + T2D risk | Body    |
| cg24356742    | ERC2     | chr3  | 0.550383596 | + T2D risk | Body    |
| cg09441903    | PRKAG2   | chr7  | 0.550492036 | + T2D risk | Body    |
| cg05060807    | PRKAG2   | chr7  | 0.55053477  | + T2D risk | Body    |
| cg11543957    | PRKAG2   | chr7  | 0.550707303 | + T2D risk | Body    |
| cg27546237    | COL4A1   | chr13 | 0.550723909 | - T2D risk | TSS1500 |
| cg25697292    | WWP2     | chr16 | 0.550794723 | - T2D risk | Body    |
| cg19303239    | ST6GAL1  | chr3  | 0.550820044 | + T2D risk | 5'UTR   |
| cg25113157    | CUX2     | chr12 | 0.550828686 | - T2D risk | Body    |
| cg12349030    | NUP98    | chr11 | 0.550849499 | - T2D risk | 5'UTR   |
| cg12349030    | NUP98    | chr11 | 0.550849499 | - T2D risk | 1stExon |
| cg12531838    | DIP2C    | chr10 | 0.550921244 | - T2D risk | Body    |
| cg24569082    | CLIC5    | chr6  | 0.551010839 | + T2D risk | Body    |
| cg25373484    | SKAP1    | chr17 | 0.551041994 | + T2D risk | Body    |
| cg24807198    | GRK5     | chr10 | 0.551048718 | + T2D risk | Body    |
| cg20485865    | STX6     | chr1  | 0.55117707  | + T2D risk | TSS1500 |
| cg15797175    | PACRG    | chr6  | 0.551197765 | - T2D risk | Body    |
| cg06270249    | ERC2     | chr3  | 0.551337873 | - T2D risk | Body    |
| cg20406483    | EVI5     | chr1  | 0.551380514 | - T2D risk | ExonBnd |
| cg20406483    | EVI5     | chr1  | 0.551380514 | - T2D risk | Body    |
| cg22994024    | CADM1    | chr11 | 0.551389125 | - T2D risk | 3'UTR   |
| cg01259619    | ITPKB    | chr1  | 0.551408475 | + T2D risk | 5'UTR   |



|            |          |       |             |            |         |
|------------|----------|-------|-------------|------------|---------|
| cg13679083 | ARL15    | chr5  | 0.551475556 | - T2D risk | Body    |
| cg06941655 | USP53    | chr4  | 0.55148479  | - T2D risk | 5'UTR   |
| cg14895029 | GNA12    | chr7  | 0.551681699 | - T2D risk | Body    |
| cg13127598 | PRKCB    | chr16 | 0.551729401 | + T2D risk | Body    |
| cg14274656 | ANK3     | chr10 | 0.551860631 | - T2D risk | 1stExon |
| cg14274656 | ANK3     | chr10 | 0.551860631 | - T2D risk | 5'UTR   |
| cg14274656 | ANK3     | chr10 | 0.551860631 | - T2D risk | Body    |
| cg24315860 | SRPK2    | chr7  | 0.552040055 | - T2D risk | TSS200  |
| cg11474135 | ANK2     | chr4  | 0.552116036 | - T2D risk | Body    |
| cg19871598 | CLEC16A  | chr16 | 0.552117378 | - T2D risk | Body    |
| cg23128584 | DIP2C    | chr10 | 0.552237226 | + T2D risk | Body    |
| cg05233160 | PDE8A    | chr15 | 0.552275418 | - T2D risk | Body    |
| cg06997134 | KREMEN1  | chr22 | 0.552371643 | - T2D risk | Body    |
| cg26975271 | WWP2     | chr16 | 0.552433217 | - T2D risk | Body    |
| cg07109965 | ATXN1    | chr6  | 0.552572465 | - T2D risk | 5'UTR   |
| cg05374171 | PRKCE    | chr2  | 0.552791456 | + T2D risk | Body    |
| cg20546935 | TPCN1    | chr12 | 0.552803409 | - T2D risk | 5'UTR   |
| cg20546935 | TPCN1    | chr12 | 0.552803409 | - T2D risk | Body    |
| cg01492538 | GNA12    | chr7  | 0.552813986 | - T2D risk | Body    |
| cg09404290 | ADCY5    | chr3  | 0.55293438  | - T2D risk | Body    |
| cg16381076 | ITPKB    | chr1  | 0.553121612 | + T2D risk | Body    |
| cg15044010 | SRPK2    | chr7  | 0.553330318 | - T2D risk | Body    |
| cg16469046 | INPP4A   | chr2  | 0.553338004 | - T2D risk | 5'UTR   |
| cg09425164 | PDE8A    | chr15 | 0.553339473 | + T2D risk | Body    |
| cg26266308 | PDE7A    | chr8  | 0.553352109 | - T2D risk | 5'UTR   |
| cg26266308 | PDE7A    | chr8  | 0.553352109 | - T2D risk | 1stExon |
| cg26266308 | PDE7A    | chr8  | 0.553352109 | - T2D risk | Body    |
| cg08368169 | ATP8A2   | chr13 | 0.553387616 | - T2D risk | Body    |
| cg07219384 | MAN1A1   | chr6  | 0.553457822 | + T2D risk | Body    |
| cg26713219 | ACTN4    | chr19 | 0.553536087 | - T2D risk | Body    |
| cg24612498 | LMCD1    | chr3  | 0.553562932 | + T2D risk | Body    |
| cg27410091 | PDE7A    | chr8  | 0.553563675 | - T2D risk | Body    |
| cg00131482 | ANK2     | chr4  | 0.553580776 | - T2D risk | Body    |
| cg19646538 | PACS1    | chr11 | 0.55359383  | - T2D risk | TSS1500 |
| cg16304927 | SLIT3    | chr5  | 0.553629144 | + T2D risk | Body    |
| cg13647309 | CCNB1    | chr5  | 0.55368641  | - T2D risk | 3'UTR   |
| cg04102510 | ITPKB    | chr1  | 0.553756569 | + T2D risk | Body    |
| cg04915058 | ERC2     | chr3  | 0.553990358 | + T2D risk | 3'UTR   |
| cg05231821 | ACTN4    | chr19 | 0.554043905 | + T2D risk | TSS200  |
| cg16968297 | PDLIM5   | chr4  | 0.554083767 | - T2D risk | 5'UTR   |
| cg16968297 | PDLIM5   | chr4  | 0.554083767 | - T2D risk | Body    |
| cg16051089 | ITGA1    | chr5  | 0.554345556 | + T2D risk | TSS200  |
| cg04643554 | KIAA1217 | chr10 | 0.554450592 | + T2D risk | Body    |
| cg22273589 | TSC22D1  | chr13 | 0.554454359 | - T2D risk | TSS1500 |
| cg22273589 | TSC22D1  | chr13 | 0.554454359 | - T2D risk | Body    |
| cg14727383 | NCOA2    | chr8  | 0.554648518 | - T2D risk | Body    |
| cg05204809 | ERC2     | chr3  | 0.554679406 | - T2D risk | 3'UTR   |
| cg01878750 | GNA12    | chr7  | 0.554750885 | + T2D risk | Body    |
| cg09556492 | PHACTR1  | chr6  | 0.554758575 | - T2D risk | Body    |
| cg17699704 | SGSM2    | chr17 | 0.554775893 | - T2D risk | TSS1500 |
| cg01738095 | ASXL2    | chr2  | 0.554897338 | + T2D risk | TSS1500 |
| cg24014236 | SH3GL2   | chr9  | 0.55508005  | + T2D risk | 5'UTR   |
| cg24014236 | SH3GL2   | chr9  | 0.55508005  | + T2D risk | 1stExon |
| cg00016814 | CNTNAP2  | chr7  | 0.555110078 | + T2D risk | Body    |
| cg17299387 | RNF157   | chr17 | 0.555144936 | + T2D risk | Body    |
| cg17026475 | MEIS2    | chr15 | 0.555187583 | - T2D risk | 5'UTR   |
| cg17026475 | MEIS2    | chr15 | 0.555187583 | - T2D risk | 1stExon |
| cg17026475 | MEIS2    | chr15 | 0.555187583 | - T2D risk | Body    |
| cg17026475 | MEIS2    | chr15 | 0.555187583 | - T2D risk | TSS1500 |
| cg02603526 | DDC      | chr7  | 0.555204142 | - T2D risk | 5'UTR   |
| cg04628881 | GALK2    | chr15 | 0.555337467 | + T2D risk | 5'UTR   |
| cg04628881 | GALK2    | chr15 | 0.555337467 | + T2D risk | Body    |
| cg00946155 | SEZ6L    | chr22 | 0.555410721 | + T2D risk | Body    |
| cg12103354 | CLIC5    | chr6  | 0.555541757 | - T2D risk | TSS1500 |
| cg26975461 | USP53    | chr4  | 0.555541992 | - T2D risk | 5'UTR   |
| cg02487809 | GRK5     | chr10 | 0.555588367 | + T2D risk | Body    |
| cg00181154 | ST6GAL1  | chr3  | 0.555599376 | - T2D risk | TSS1500 |
| cg25998678 | GALK2    | chr15 | 0.555613303 | - T2D risk | 5'UTR   |
| cg25998678 | GALK2    | chr15 | 0.555613303 | - T2D risk | 1stExon |
| cg25998678 | GALK2    | chr15 | 0.555613303 | - T2D risk | Body    |



|            |          |       |             |            |         |
|------------|----------|-------|-------------|------------|---------|
| cg20224867 | ULK4     | chr3  | 0.55580429  | + T2D risk | Body    |
| cg04782618 | TENM2    | chr5  | 0.556096453 | + T2D risk | Body    |
| cg15267873 | DNAJC13  | chr3  | 0.556245671 | + T2D risk | Body    |
| cg01528425 | APC      | chr5  | 0.556336962 | + T2D risk | TSS200  |
| cg19410750 | SCAF11   | chr12 | 0.556370524 | - T2D risk | Body    |
| cg06328725 | PACRG    | chr6  | 0.556495949 | + T2D risk | Body    |
| cg15001981 | AGPAT3   | chr21 | 0.556859624 | - T2D risk | 5'UTR   |
| cg25674102 | KIAA1217 | chr10 | 0.557079601 | - T2D risk | Body    |
| cg15024660 | ARL15    | chr5  | 0.557126317 | - T2D risk | Body    |
| cg23495031 | PRKAG2   | chr7  | 0.55717435  | - T2D risk | Body    |
| cg18393040 | MEIS2    | chr15 | 0.557228585 | + T2D risk | 5'UTR   |
| cg18393040 | MEIS2    | chr15 | 0.557228585 | + T2D risk | TSS1500 |
| cg16085344 | ATP8A1   | chr4  | 0.557305409 | - T2D risk | 3'UTR   |
| cg00872701 | PPFIBP1  | chr12 | 0.557315817 | - T2D risk | 5'UTR   |
| cg08751994 | DYNC111  | chr7  | 0.557584614 | + T2D risk | Body    |
| cg13528956 | PACS1    | chr11 | 0.557585156 | - T2D risk | Body    |
| cg17013870 | IMPA1    | chr8  | 0.557626758 | + T2D risk | TSS1500 |
| cg27136228 | AMD1     | chr6  | 0.557772148 | - T2D risk | Body    |
| cg19731401 | GNA12    | chr7  | 0.557878956 | - T2D risk | Body    |
| cg02993937 | CNTROB   | chr17 | 0.557887198 | - T2D risk | Body    |
| cg18857899 | LMCD1    | chr3  | 0.55790104  | - T2D risk | Body    |
| cg26451873 | CDK8     | chr13 | 0.557918979 | + T2D risk | Body    |
| cg19566879 | ATXN1    | chr6  | 0.557961004 | - T2D risk | 5'UTR   |
| cg11524513 | RHBDD1   | chr2  | 0.557995219 | - T2D risk | Body    |
| cg25900222 | KIAA1109 | chr4  | 0.558005233 | - T2D risk | Body    |
| cg06596387 | TJP1     | chr15 | 0.558038657 | - T2D risk | 1stExon |
| cg06596387 | TJP1     | chr15 | 0.558038657 | - T2D risk | 5'UTR   |
| cg06596387 | TJP1     | chr15 | 0.558038657 | - T2D risk | Body    |
| cg20087010 | GLG1     | chr16 | 0.558540441 | - T2D risk | Body    |
| cg18356743 | UBL3     | chr13 | 0.55863686  | - T2D risk | Body    |
| cg19161022 | AGPAT3   | chr21 | 0.558757738 | - T2D risk | 5'UTR   |
| cg19161022 | AGPAT3   | chr21 | 0.558757738 | - T2D risk | TSS1500 |
| cg11160386 | MDM1     | chr12 | 0.558777407 | - T2D risk | Body    |
| cg25860096 | RBM4     | chr11 | 0.55884001  | + T2D risk | Body    |
| cg03154286 | RGS7     | chr1  | 0.558841153 | + T2D risk | 5'UTR   |
| cg27216384 | PLAGL1   | chr6  | 0.558905354 | + T2D risk | TSS1500 |
| cg27216384 | PLAGL1   | chr6  | 0.558905354 | + T2D risk | 5'UTR   |
| cg03907390 | GRK5     | chr10 | 0.558908319 | + T2D risk | Body    |
| cg01282080 | NOTCH3   | chr19 | 0.558986896 | + T2D risk | Body    |
| cg15278747 | PACS2    | chr14 | 0.559448861 | - T2D risk | Body    |
| cg21110337 | TPCN1    | chr12 | 0.559520899 | - T2D risk | Body    |
| cg06945504 | SEZ6L    | chr22 | 0.559537808 | - T2D risk | Body    |
| cg16135276 | DIP2C    | chr10 | 0.559557684 | + T2D risk | Body    |
| cg17264779 | RAP1GAP2 | chr17 | 0.559602122 | - T2D risk | Body    |
| cg06722976 | ITGB1    | chr10 | 0.559663381 | + T2D risk | 3'UTR   |
| cg06722976 | ITGB1    | chr10 | 0.559663381 | + T2D risk | Body    |
| cg01826124 | FLT1     | chr13 | 0.559764763 | - T2D risk | Body    |
| cg06753153 | PLEKHG3  | chr14 | 0.559877328 | + T2D risk | 5'UTR   |
| cg07486584 | DNAH9    | chr17 | 0.559953125 | - T2D risk | Body    |
| cg05138138 | UXS1     | chr2  | 0.55998067  | - T2D risk | Body    |
| cg02628881 | KIAA0355 | chr19 | 0.559983627 | + T2D risk | TSS1500 |
| cg20189474 | PRKCB    | chr16 | 0.560045451 | + T2D risk | Body    |
| cg13556387 | ITGB1    | chr10 | 0.560197437 | + T2D risk | TSS1500 |
| cg13556387 | ITGB1    | chr10 | 0.560197437 | + T2D risk | 5'UTR   |
| cg09970590 | MEIS2    | chr15 | 0.560344234 | + T2D risk | Body    |
| cg06139060 | SCARB2   | chr4  | 0.560561037 | + T2D risk | 3'UTR   |
| cg20638683 | CLIC5    | chr6  | 0.560668549 | + T2D risk | Body    |
| cg22563040 | ARL15    | chr5  | 0.560689844 | - T2D risk | Body    |
| cg26532208 | SKAP1    | chr17 | 0.560752209 | - T2D risk | Body    |
| cg14494018 | PHACTR1  | chr6  | 0.560772988 | - T2D risk | Body    |
| cg12640653 | SLIT3    | chr5  | 0.560851938 | - T2D risk | Body    |
| cg01002284 | CEP126   | chr11 | 0.560867033 | - T2D risk | TSS1500 |
| cg21123740 | PDE5A    | chr4  | 0.560897194 | - T2D risk | Body    |
| cg03637447 | INPP4A   | chr2  | 0.560909608 | + T2D risk | TSS200  |
| cg04876084 | ERC2     | chr3  | 0.560913303 | - T2D risk | Body    |
| cg07627002 | PACS1    | chr11 | 0.561043936 | - T2D risk | Body    |
| cg23180235 | LMCD1    | chr3  | 0.561078008 | + T2D risk | Body    |
| cg06051213 | GRK5     | chr10 | 0.561141448 | + T2D risk | Body    |
| cg02260576 | SGSM2    | chr17 | 0.561264047 | + T2D risk | Body    |
| cg01666675 | ZHX2     | chr8  | 0.561333953 | - T2D risk | 5'UTR   |



|            |                 |       |             |            |         |
|------------|-----------------|-------|-------------|------------|---------|
| cg09642428 | <i>SPOCK1</i>   | chr5  | 0.561436293 | - T2D risk | Body    |
| cg19454959 | <i>ULK4</i>     | chr3  | 0.561529009 | + T2D risk | TSS200  |
| cg16319445 | <i>TMEM131</i>  | chr2  | 0.561580084 | - T2D risk | TSS1500 |
| cg16274899 | <i>PLEKHG3</i>  | chr14 | 0.56159361  | + T2D risk | 5'UTR   |
| cg22999536 | <i>DIP2C</i>    | chr10 | 0.561715896 | - T2D risk | Body    |
| cg12346351 | <i>FAM160A1</i> | chr4  | 0.561776625 | + T2D risk | TSS200  |
| cg18077307 | <i>TMEM131</i>  | chr2  | 0.561803022 | + T2D risk | Body    |
| cg16905129 | <i>SEC31A</i>   | chr4  | 0.561831502 | + T2D risk | 5'UTR   |
| cg16905129 | <i>SEC31A</i>   | chr4  | 0.561831502 | + T2D risk | Body    |
| cg19122463 | <i>PCYT1A</i>   | chr3  | 0.561859938 | - T2D risk | ExonBnd |
| cg19122463 | <i>PCYT1A</i>   | chr3  | 0.561859938 | - T2D risk | Body    |
| cg10069305 | <i>PACS2</i>    | chr14 | 0.562011218 | - T2D risk | Body    |
| cg00611847 | <i>DDC</i>      | chr7  | 0.562081418 | + T2D risk | Body    |
| cg16386425 | <i>DIP2C</i>    | chr10 | 0.562084232 | - T2D risk | Body    |
| cg10479221 | <i>SPAG9</i>    | chr17 | 0.562151988 | + T2D risk | Body    |
| cg05108346 | <i>PDLIM5</i>   | chr4  | 0.562211216 | - T2D risk | 5'UTR   |
| cg05108346 | <i>PDLIM5</i>   | chr4  | 0.562211216 | - T2D risk | Body    |
| cg06668695 | <i>ST20</i>     | chr15 | 0.562324024 | + T2D risk | 5'UTR   |
| cg06668695 | <i>ST20</i>     | chr15 | 0.562324024 | + T2D risk | Body    |
| cg14914809 | <i>GAD1</i>     | chr2  | 0.562337704 | - T2D risk | Body    |
| cg14659678 | <i>ARID2</i>    | chr12 | 0.562357082 | - T2D risk | Body    |
| cg25756435 | <i>MAST1</i>    | chr19 | 0.56243872  | + T2D risk | Body    |
| cg11132198 | <i>PPFIBP1</i>  | chr12 | 0.56245432  | + T2D risk | 3'UTR   |
| cg06516482 | <i>PRKAG2</i>   | chr7  | 0.562727388 | + T2D risk | Body    |
| cg01411440 | <i>CNTR0B</i>   | chr17 | 0.56273443  | - T2D risk | TSS200  |
| cg02005232 | <i>CADM1</i>    | chr11 | 0.562886501 | - T2D risk | Body    |
| cg23845211 | <i>CHFR</i>     | chr12 | 0.562980956 | - T2D risk | Body    |
| cg13917002 | <i>APBA1</i>    | chr9  | 0.562986388 | - T2D risk | 5'UTR   |
| cg14851496 | <i>PACS2</i>    | chr14 | 0.563165738 | + T2D risk | Body    |
| cg09840968 | <i>MEIS2</i>    | chr15 | 0.563274714 | - T2D risk | TSS1500 |
| cg03805527 | <i>FLT1</i>     | chr13 | 0.563329282 | + T2D risk | Body    |
| cg08918431 | <i>ANKHD1</i>   | chr5  | 0.563430943 | + T2D risk | TSS1500 |
| cg12187810 | <i>PRKCE</i>    | chr2  | 0.563441853 | + T2D risk | Body    |
| cg27190366 | <i>RTN4</i>     | chr2  | 0.563523973 | - T2D risk | TSS200  |
| cg07102474 | <i>TANC2</i>    | chr17 | 0.563531461 | + T2D risk | Body    |
| cg16087630 | <i>CHKA</i>     | chr11 | 0.563552452 | - T2D risk | TSS1500 |
| cg00691830 | <i>MEIS2</i>    | chr15 | 0.563746664 | - T2D risk | Body    |
| cg00982974 | <i>CUX1</i>     | chr7  | 0.563797081 | + T2D risk | Body    |
| cg02315450 | <i>YWHAQ</i>    | chr2  | 0.563801282 | - T2D risk | Body    |
| cg08573115 | <i>PPFIBP1</i>  | chr12 | 0.563817693 | - T2D risk | 5'UTR   |
| cg02291472 | <i>DNAJC1</i>   | chr10 | 0.563916535 | + T2D risk | TSS200  |
| cg05838101 | <i>TTC28</i>    | chr22 | 0.563982183 | + T2D risk | Body    |
| cg04554506 | <i>MEIS2</i>    | chr15 | 0.56403482  | + T2D risk | Body    |
| cg00580854 | <i>JPH2</i>     | chr20 | 0.564085971 | + T2D risk | Body    |
| cg05709325 | <i>PRKD1</i>    | chr14 | 0.564325314 | - T2D risk | Body    |
| cg11484783 | <i>RNF217</i>   | chr6  | 0.564366307 | + T2D risk | Body    |
| cg27051502 | <i>TSGA10</i>   | chr2  | 0.564435107 | - T2D risk | Body    |
| cg00927151 | <i>SCAF8</i>    | chr6  | 0.564473838 | + T2D risk | Body    |
| cg20442744 | <i>RGS7</i>     | chr1  | 0.564593581 | + T2D risk | Body    |
| cg13086402 | <i>UNC80</i>    | chr2  | 0.564708733 | - T2D risk | Body    |
| cg27109284 | <i>NPEPPS</i>   | chr17 | 0.564859291 | - T2D risk | Body    |
| cg03075966 | <i>GRK5</i>     | chr10 | 0.564903869 | - T2D risk | Body    |
| cg07779484 | <i>RHOA</i>     | chr3  | 0.564932618 | + T2D risk | 5'UTR   |
| cg06648782 | <i>PACRG</i>    | chr6  | 0.565027121 | - T2D risk | Body    |
| cg11922514 | <i>UNC80</i>    | chr2  | 0.565124743 | - T2D risk | Body    |
| cg13601997 | <i>LMX1B</i>    | chr9  | 0.56535223  | - T2D risk | TSS1500 |
| cg25326688 | <i>TENM2</i>    | chr5  | 0.565472964 | + T2D risk | Body    |
| cg13760845 | <i>FLT1</i>     | chr13 | 0.565511058 | + T2D risk | Body    |
| cg03938187 | <i>FBXO11</i>   | chr2  | 0.565564219 | - T2D risk | Body    |
| cg27472701 | <i>MET</i>      | chr7  | 0.565593843 | + T2D risk | 5'UTR   |
| cg27201627 | <i>CDH22</i>    | chr20 | 0.56561426  | - T2D risk | Body    |
| cg07806801 | <i>CADM1</i>    | chr11 | 0.565693383 | - T2D risk | 3'UTR   |
| cg10860568 | <i>CEP126</i>   | chr11 | 0.565790385 | - T2D risk | Body    |
| cg03512465 | <i>DIP2C</i>    | chr10 | 0.565806219 | + T2D risk | Body    |
| cg03828860 | <i>CNTR0B</i>   | chr17 | 0.565859651 | - T2D risk | 1stExon |
| cg03828860 | <i>CNTR0B</i>   | chr17 | 0.565859651 | - T2D risk | 5'UTR   |
| cg20281905 | <i>CUX1</i>     | chr7  | 0.565986486 | + T2D risk | Body    |
| cg20091587 | <i>SEC31A</i>   | chr4  | 0.566041169 | + T2D risk | Body    |
| cg03455828 | <i>CLEC16A</i>  | chr16 | 0.566111075 | - T2D risk | Body    |
| cg06171908 | <i>USP29</i>    | chr19 | 0.56612875  | - T2D risk | TSS1500 |



|              |          |       |             |            |         |
|--------------|----------|-------|-------------|------------|---------|
| cg14075393   | ATP8A2   | chr13 | 0.56622078  | + T2D risk | Body    |
| cg21571596   | RPGR     | chrX  | 0.566242844 | + T2D risk | Body    |
| cg04509648   | TAZ      | chrX  | 0.566270106 | - T2D risk | Body    |
| cg26132715   | ANK3     | chr10 | 0.56641081  | - T2D risk | Body    |
| cg16846532   | DDC      | chr7  | 0.566467526 | - T2D risk | TSS1500 |
| cg22811859   | LAP3     | chr4  | 0.566488405 | + T2D risk | Body    |
| cg05252062   | CUX1     | chr7  | 0.566507359 | - T2D risk | Body    |
| cg26344026   | PACS1    | chr11 | 0.566607104 | + T2D risk | Body    |
| cg21026553   | KCNJ12   | chr17 | 0.566799578 | - T2D risk | 5'UTR   |
| cg21026553   | KCNJ12   | chr17 | 0.566799578 | - T2D risk | 1stExon |
| cg06481699   | CUX1     | chr7  | 0.566822583 | - T2D risk | TSS1500 |
| cg12854721   | CUX1     | chr7  | 0.566912609 | - T2D risk | Body    |
| cg11830387   | TSC22D1  | chr13 | 0.56693673  | - T2D risk | Body    |
| cg02296478   | ANK2     | chr4  | 0.566993336 | + T2D risk | Body    |
| cg14345978   | GNA12    | chr7  | 0.567044162 | - T2D risk | Body    |
| cg14345978   | GNA12    | chr7  | 0.567044162 | - T2D risk | TSS1500 |
| cg16776670   | POLA1    | chrX  | 0.567261143 | + T2D risk | Body    |
| ch.7.141697R | GNA12    | chr7  | 0.567266562 | + T2D risk | Body    |
| cg27322545   | IFT74    | chr9  | 0.567285689 | - T2D risk | TSS1500 |
| cg27322545   | IFT74    | chr9  | 0.567285689 | - T2D risk | TSS200  |
| cg14580919   | KDM4B    | chr19 | 0.56746316  | + T2D risk | Body    |
| cg10325509   | KIAA1217 | chr10 | 0.567501726 | - T2D risk | 5'UTR   |
| cg00290758   | GRK5     | chr10 | 0.567528138 | - T2D risk | Body    |
| cg07793203   | YWHAQ    | chr2  | 0.567563785 | - T2D risk | TSS1500 |
| cg23633413   | CHFR     | chr12 | 0.567661956 | + T2D risk | Body    |
| cg07298363   | ITGA1    | chr5  | 0.567716113 | - T2D risk | Body    |
| cg00577375   | PRKAG2   | chr7  | 0.567719474 | + T2D risk | Body    |
| cg08445905   | NUF2     | chr1  | 0.567735641 | - T2D risk | Body    |
| cg18852426   | TJP1     | chr15 | 0.567765343 | + T2D risk | Body    |
| cg17286211   | ATP4A    | chr19 | 0.56776536  | - T2D risk | Body    |
| cg26202404   | SUB1     | chr5  | 0.567835807 | - T2D risk | Body    |
| cg25371487   | RTN4     | chr2  | 0.567887357 | - T2D risk | TSS1500 |
| cg13037901   | ST20     | chr15 | 0.567896558 | - T2D risk | 5'UTR   |
| cg13037901   | ST20     | chr15 | 0.567896558 | - T2D risk | Body    |
| cg26019654   | ARL15    | chr5  | 0.56800833  | - T2D risk | Body    |
| cg15341833   | UXS1     | chr2  | 0.568058043 | + T2D risk | Body    |
| cg21858225   | PDE5A    | chr4  | 0.568110242 | - T2D risk | Body    |
| cg24436196   | ERC2     | chr3  | 0.568181115 | + T2D risk | Body    |
| cg16897885   | KCNJ12   | chr17 | 0.568274596 | - T2D risk | 5'UTR   |
| cg01793956   | RRAGB    | chrX  | 0.568501874 | + T2D risk | Body    |
| cg01793956   | RRAGB    | chrX  | 0.568501874 | + T2D risk | ExonBnd |
| cg26718511   | SCGN     | chr6  | 0.568527328 | - T2D risk | 5'UTR   |
| cg26718511   | SCGN     | chr6  | 0.568527328 | - T2D risk | 1stExon |
| cg21828951   | CUL1     | chr7  | 0.56856934  | + T2D risk | 5'UTR   |
| cg22074675   | CHKA     | chr11 | 0.568587806 | + T2D risk | 1stExon |
| cg22074675   | CHKA     | chr11 | 0.568587806 | + T2D risk | 5'UTR   |
| cg00519208   | EVI5     | chr1  | 0.568659474 | - T2D risk | TSS1500 |
| cg17763260   | MAST1    | chr19 | 0.568826501 | - T2D risk | Body    |
| cg17201960   | UXS1     | chr2  | 0.568858709 | + T2D risk | Body    |
| cg13119097   | RNF157   | chr17 | 0.568863656 | + T2D risk | Body    |
| cg14661161   | NCOA2    | chr8  | 0.568893258 | + T2D risk | 5'UTR   |
| cg11499681   | DNAH9    | chr17 | 0.569082162 | - T2D risk | TSS200  |
| cg25264004   | GAD1     | chr2  | 0.569146172 | - T2D risk | 5'UTR   |
| cg25646239   | UXS1     | chr2  | 0.569254386 | + T2D risk | Body    |
| cg25646239   | UXS1     | chr2  | 0.569254386 | + T2D risk | TSS1500 |
| cg03893806   | DENND4C  | chr9  | 0.569266418 | - T2D risk | Body    |
| cg15859278   | UBE2K    | chr4  | 0.569342188 | + T2D risk | Body    |
| cg26833784   | FLT1     | chr13 | 0.569361493 | + T2D risk | 3'UTR   |
| cg11797265   | ATXN1    | chr6  | 0.569525763 | + T2D risk | 5'UTR   |
| cg23184174   | SLIT3    | chr5  | 0.56960564  | - T2D risk | Body    |
| cg23042387   | DIP2C    | chr10 | 0.569869202 | + T2D risk | Body    |
| cg04502145   | ROBO2    | chr3  | 0.569870891 | - T2D risk | 5'UTR   |
| cg04502145   | ROBO2    | chr3  | 0.569870891 | - T2D risk | Body    |
| cg20758834   | ANK2     | chr4  | 0.570126372 | + T2D risk | Body    |
| cg12888632   | PTPRU    | chr1  | 0.57014381  | - T2D risk | Body    |
| cg13831483   | RNF157   | chr17 | 0.570167413 | - T2D risk | Body    |
| cg21005024   | DDC      | chr7  | 0.570168251 | + T2D risk | Body    |
| cg01584205   | RNF157   | chr17 | 0.570330648 | - T2D risk | Body    |
| cg01584205   | RNF157   | chr17 | 0.570330648 | - T2D risk | ExonBnd |
| cg14899615   | ZHX2     | chr8  | 0.57035627  | + T2D risk | 5'UTR   |



|            |         |       |             |            |         |
|------------|---------|-------|-------------|------------|---------|
| cg05026785 | KCNIP3  | chr2  | 0.570511222 | - T2D risk | TSS1500 |
| cg08021602 | DACH1   | chr13 | 0.570550119 | - T2D risk | Body    |
| cg10936841 | CPLX2   | chr5  | 0.570613505 | - T2D risk | 5'UTR   |
| cg18334288 | DIP2C   | chr10 | 0.570805833 | + T2D risk | Body    |
| cg16232702 | DDHD2   | chr8  | 0.570870619 | + T2D risk | 5'UTR   |
| cg16232702 | DDHD2   | chr8  | 0.570870619 | + T2D risk | TSS200  |
| cg07137244 | NF1     | chr17 | 0.570872322 | - T2D risk | Body    |
| cg09413378 | ADCY5   | chr3  | 0.570961963 | - T2D risk | Body    |
| cg09661016 | SEZ6L   | chr22 | 0.570962462 | + T2D risk | Body    |
| cg09887953 | SLIT3   | chr5  | 0.571005392 | + T2D risk | Body    |
| cg12172612 | NUCB2   | chr11 | 0.571073613 | + T2D risk | Body    |
| cg12172612 | NUCB2   | chr11 | 0.571073613 | + T2D risk | ExonBnd |
| cg13999415 | SSBP2   | chr5  | 0.57125036  | - T2D risk | TSS1500 |
| cg00800606 | ST8SIA1 | chr12 | 0.571399558 | + T2D risk | 3'UTR   |
| cg04273674 | NCOA7   | chr6  | 0.571472485 | - T2D risk | Body    |
| cg04273674 | NCOA7   | chr6  | 0.571472485 | - T2D risk | TSS1500 |
| cg05147453 | NCOA2   | chr8  | 0.571634899 | + T2D risk | Body    |
| cg24241655 | ZRANB1  | chr10 | 0.571687338 | - T2D risk | Body    |
| cg13263093 | PHACTR1 | chr6  | 0.571688241 | + T2D risk | Body    |
| cg23204897 | PHACTR1 | chr6  | 0.571714276 | - T2D risk | Body    |
| cg26758826 | TENM2   | chr5  | 0.571750758 | + T2D risk | Body    |
| cg25833403 | DACH1   | chr13 | 0.571810106 | + T2D risk | Body    |
| cg03403093 | INPP4A  | chr2  | 0.571937755 | + T2D risk | 5'UTR   |
| cg10400227 | COL4A1  | chr13 | 0.571941158 | - T2D risk | TSS1500 |
| cg26697116 | ST20    | chr15 | 0.572037669 | - T2D risk | 5'UTR   |
| cg26697116 | ST20    | chr15 | 0.572037669 | - T2D risk | Body    |
| cg17446583 | BCAT1   | chr12 | 0.572108705 | + T2D risk | Body    |
| cg01323926 | DLL4    | chr15 | 0.572386431 | - T2D risk | TSS1500 |
| cg26648818 | TOX3    | chr16 | 0.572568422 | + T2D risk | TSS200  |
| cg26648818 | TOX3    | chr16 | 0.572568422 | + T2D risk | TSS1500 |
| cg20492354 | ARL15   | chr5  | 0.572617955 | + T2D risk | Body    |
| cg11664313 | DACH1   | chr13 | 0.572816417 | + T2D risk | TSS1500 |
| cg05380956 | ULK4    | chr3  | 0.572971479 | - T2D risk | Body    |
| cg24750627 | PLAGL1  | chr6  | 0.572990504 | + T2D risk | TSS1500 |
| cg12528184 | TMEM131 | chr2  | 0.57301565  | - T2D risk | Body    |
| cg11102019 | SEMA3G  | chr3  | 0.573107584 | - T2D risk | TSS200  |
| cg10893864 | ADCY5   | chr3  | 0.573128006 | - T2D risk | Body    |
| cg02708898 | ATP6V1H | chr8  | 0.573225047 | - T2D risk | 5'UTR   |
| cg02708898 | ATP6V1H | chr8  | 0.573225047 | - T2D risk | TSS1500 |
| cg02708898 | ATP6V1H | chr8  | 0.573225047 | - T2D risk | 1stExon |
| cg20994699 | PDE3A   | chr12 | 0.573308655 | - T2D risk | Body    |
| cg10629367 | ATXN1   | chr6  | 0.573671816 | + T2D risk | 5'UTR   |
| cg19005390 | COL4A1  | chr13 | 0.57368051  | - T2D risk | Body    |
| cg13512138 | CHID1   | chr11 | 0.573743752 | + T2D risk | 5'UTR   |
| cg19212948 | RBBP6   | chr16 | 0.57396164  | - T2D risk | 5'UTR   |
| cg19212948 | RBBP6   | chr16 | 0.57396164  | - T2D risk | 1stExon |
| cg17045869 | SUB1    | chr5  | 0.57399934  | - T2D risk | 5'UTR   |
| cg17045869 | SUB1    | chr5  | 0.57399934  | - T2D risk | 1stExon |
| cg25942783 | PPFIBP1 | chr12 | 0.574033192 | - T2D risk | 5'UTR   |
| cg08665196 | ST8SIA1 | chr12 | 0.57403638  | + T2D risk | Body    |
| cg16922523 | CADM1   | chr11 | 0.574036522 | + T2D risk | Body    |
| cg25335440 | CUX1    | chr7  | 0.574227704 | + T2D risk | Body    |
| cg08896456 | KCNIP3  | chr2  | 0.574229998 | + T2D risk | Body    |
| cg04332110 | CLEC16A | chr16 | 0.574343919 | - T2D risk | Body    |
| cg04332110 | CLEC16A | chr16 | 0.574343919 | - T2D risk | ExonBnd |
| cg04279973 | PRKCB   | chr16 | 0.574346559 | - T2D risk | TSS1500 |
| cg02216200 | PPFIBP1 | chr12 | 0.574417051 | + T2D risk | 5'UTR   |
| cg02216200 | PPFIBP1 | chr12 | 0.574417051 | + T2D risk | Body    |
| cg02067908 | ERC2    | chr3  | 0.57460737  | + T2D risk | 3'UTR   |
| cg01028000 | ARL8B   | chr3  | 0.574647575 | - T2D risk | Body    |
| cg23689697 | SSB     | chr2  | 0.574650686 | + T2D risk | Body    |
| cg23689697 | SSB     | chr2  | 0.574650686 | + T2D risk | ExonBnd |
| cg21750800 | CLEC16A | chr16 | 0.57470259  | + T2D risk | Body    |
| cg22266009 | KCNJ12  | chr17 | 0.574806382 | + T2D risk | 5'UTR   |
| cg23165545 | RHOA    | chr3  | 0.575154982 | - T2D risk | TSS200  |
| cg07309144 | NPEPPS  | chr17 | 0.575265623 | - T2D risk | Body    |
| cg03627409 | PTPRU   | chr1  | 0.575321138 | - T2D risk | Body    |
| cg22528270 | PRKAG2  | chr7  | 0.575389636 | - T2D risk | 5'UTR   |
| cg22528270 | PRKAG2  | chr7  | 0.575389636 | - T2D risk | Body    |
| cg15610472 | ARL15   | chr5  | 0.575411504 | - T2D risk | Body    |



|            |          |       |             |            |         |
|------------|----------|-------|-------------|------------|---------|
| cg04927066 | SPOCK1   | chr5  | 0.575503013 | - T2D risk | Body    |
| cg25412448 | PACRG    | chr6  | 0.575649212 | - T2D risk | Body    |
| cg02659867 | KDM4B    | chr19 | 0.575687883 | + T2D risk | Body    |
| cg01342448 | ATRNL1   | chr10 | 0.575712723 | - T2D risk | Body    |
| cg13781197 | PDE8A    | chr15 | 0.57576599  | + T2D risk | Body    |
| cg26553736 | GALK2    | chr15 | 0.575786797 | + T2D risk | Body    |
| cg12230180 | GRK5     | chr10 | 0.575964693 | - T2D risk | Body    |
| cg09543660 | CLASP2   | chr3  | 0.575981065 | + T2D risk | Body    |
| cg10093934 | PKD1     | chr2  | 0.576024981 | - T2D risk | Body    |
| cg26428889 | MET      | chr7  | 0.576029912 | - T2D risk | TSS1500 |
| cg27262174 | KREMEN1  | chr22 | 0.576082497 | - T2D risk | Body    |
| cg22116492 | MET      | chr7  | 0.576297192 | - T2D risk | Body    |
| cg17878351 | CLIC5    | chr6  | 0.576377087 | + T2D risk | Body    |
| cg20136435 | CRYL1    | chr13 | 0.576473628 | + T2D risk | TSS1500 |
| cg25714057 | ADCY5    | chr3  | 0.576556177 | - T2D risk | Body    |
| cg23697486 | CUX2     | chr12 | 0.576643364 | - T2D risk | Body    |
| cg05897030 | PPFIBP1  | chr12 | 0.576644767 | - T2D risk | 5'UTR   |
| cg20190649 | SKAP1    | chr17 | 0.576869668 | - T2D risk | Body    |
| cg14706661 | CUX2     | chr12 | 0.576980024 | + T2D risk | 3'UTR   |
| cg16448401 | DIP2C    | chr10 | 0.576985675 | + T2D risk | Body    |
| cg21928347 | CDH22    | chr20 | 0.577005427 | + T2D risk | Body    |
| cg02312647 | INPP4A   | chr2  | 0.577027129 | + T2D risk | Body    |
| cg26059418 | BCAT1    | chr12 | 0.577156143 | + T2D risk | Body    |
| cg13021301 | CNTROB   | chr17 | 0.577160778 | + T2D risk | 1stExon |
| cg25638118 | ARIH1    | chr15 | 0.57741649  | + T2D risk | Body    |
| cg03789645 | CUL1     | chr7  | 0.577543448 | + T2D risk | TSS1500 |
| cg26467673 | KIAA0355 | chr19 | 0.577565928 | - T2D risk | 5'UTR   |
| cg17252780 | SNX4     | chr3  | 0.577599293 | + T2D risk | Body    |
| cg24282422 | SNX4     | chr3  | 0.577691673 | - T2D risk | TSS200  |
| cg20890687 | PPFIBP1  | chr12 | 0.577844473 | + T2D risk | Body    |
| cg10164018 | SMG7     | chr1  | 0.577859045 | - T2D risk | TSS1500 |
| cg17897352 | GRK5     | chr10 | 0.577987386 | + T2D risk | Body    |
| cg21245372 | NUP98    | chr11 | 0.578006681 | + T2D risk | TSS1500 |
| cg04659658 | DENND4C  | chr9  | 0.578006704 | + T2D risk | TSS1500 |
| cg27060609 | SEZ6L    | chr22 | 0.578094556 | + T2D risk | Body    |
| cg13855589 | ASH1L    | chr1  | 0.578151408 | + T2D risk | Body    |
| cg18208632 | SLIT3    | chr5  | 0.578343412 | - T2D risk | Body    |
| cg06613666 | ARID2    | chr12 | 0.578399258 | + T2D risk | TSS1500 |
| cg01941881 | PACS2    | chr14 | 0.578455788 | + T2D risk | Body    |
| cg26407811 | PRKAG2   | chr7  | 0.578470101 | - T2D risk | Body    |
| cg02377544 | MEIS2    | chr15 | 0.578482063 | + T2D risk | Body    |
| cg18070802 | GLG1     | chr16 | 0.578515184 | - T2D risk | Body    |
| cg03592906 | KDM4B    | chr19 | 0.578749097 | - T2D risk | Body    |
| cg07910010 | FARSB    | chr2  | 0.578866188 | - T2D risk | Body    |
| cg19149140 | NUP98    | chr11 | 0.578973799 | - T2D risk | 3'UTR   |
| cg15602999 | PDE3A    | chr12 | 0.579001094 | - T2D risk | 1stExon |
| cg15602999 | PDE3A    | chr12 | 0.579001094 | - T2D risk | Body    |
| cg12901835 | GNA12    | chr7  | 0.579031902 | + T2D risk | Body    |
| cg03830169 | INPP4A   | chr2  | 0.57903255  | + T2D risk | Body    |
| cg04566019 | TENM2    | chr5  | 0.579071938 | - T2D risk | Body    |
| cg12759997 | TMEM59   | chr1  | 0.579303995 | - T2D risk | 1stExon |
| cg23698832 | SLC29A4  | chr7  | 0.579308063 | + T2D risk | Body    |
| cg03348965 | PDE5A    | chr4  | 0.579511928 | + T2D risk | Body    |
| cg10296301 | PACRG    | chr6  | 0.579515354 | - T2D risk | Body    |
| cg11839771 | ST20     | chr15 | 0.57970671  | + T2D risk | 5'UTR   |
| cg07236912 | PDLIM5   | chr4  | 0.579911751 | + T2D risk | Body    |
| cg09769542 | TOX3     | chr16 | 0.580004692 | + T2D risk | TSS1500 |
| cg20085125 | ATP6V1A  | chr3  | 0.580060484 | + T2D risk | Body    |
| cg04555836 | MYO6     | chr6  | 0.580148192 | - T2D risk | TSS1500 |
| cg01263942 | DIP2C    | chr10 | 0.580152944 | - T2D risk | Body    |
| cg16739639 | ITPKB    | chr1  | 0.58018396  | + T2D risk | Body    |
| cg26980138 | MDM1     | chr12 | 0.580210418 | - T2D risk | TSS1500 |
| cg23263176 | TENM2    | chr5  | 0.580249248 | + T2D risk | Body    |
| cg06085476 | CLOCK    | chr4  | 0.580370065 | - T2D risk | TSS1500 |
| cg07102262 | PPFIBP1  | chr12 | 0.58042185  | + T2D risk | 5'UTR   |
| cg05070265 | ERC2     | chr3  | 0.580543761 | + T2D risk | Body    |
| cg16366546 | KIAA1217 | chr10 | 0.580564242 | + T2D risk | Body    |
| cg24470298 | DIP2C    | chr10 | 0.580591368 | + T2D risk | Body    |
| cg09300914 | NGLY1    | chr3  | 0.580638485 | - T2D risk | Body    |
| cg09300914 | OXSM     | chr3  | 0.580638485 | - T2D risk | TSS1500 |



|            |          |       |             |            |         |
|------------|----------|-------|-------------|------------|---------|
| cg04825276 | DIP2C    | chr10 | 0.58079084  | + T2D risk | Body    |
| cg14886857 | MEIS2    | chr15 | 0.581033257 | + T2D risk | Body    |
| cg26765295 | CLEC16A  | chr16 | 0.581067511 | - T2D risk | Body    |
| cg09980876 | TAB2     | chr6  | 0.581075106 | + T2D risk | Body    |
| cg01260541 | MAN1A1   | chr6  | 0.581077824 | - T2D risk | 3'UTR   |
| cg24532476 | CHFR     | chr12 | 0.581083055 | + T2D risk | Body    |
| cg13250776 | ATP8A2   | chr13 | 0.581204834 | + T2D risk | Body    |
| cg03486689 | USP53    | chr4  | 0.581218747 | - T2D risk | 5'UTR   |
| cg03486689 | USP53    | chr4  | 0.581218747 | - T2D risk | 1stExon |
| cg18936283 | DIP2C    | chr10 | 0.581277378 | + T2D risk | Body    |
| cg18835815 | ATP6V1H  | chr8  | 0.581278232 | + T2D risk | TSS1500 |
| cg11588932 | NPAT     | chr11 | 0.581294193 | + T2D risk | Body    |
| cg05698732 | COL4A1   | chr13 | 0.581306555 | + T2D risk | Body    |
| cg16824480 | RNF157   | chr17 | 0.581490423 | - T2D risk | Body    |
| cg17347903 | WWP2     | chr16 | 0.581572869 | + T2D risk | 5'UTR   |
| cg12158810 | KCNIP3   | chr2  | 0.581783554 | + T2D risk | TSS1500 |
| cg24933651 | ROBO2    | chr3  | 0.582044266 | - T2D risk | TSS200  |
| cg24933651 | ROBO2    | chr3  | 0.582044266 | - T2D risk | Body    |
| cg05041125 | GRK5     | chr10 | 0.58209674  | - T2D risk | Body    |
| cg04183188 | RGS7     | chr1  | 0.582287551 | + T2D risk | Body    |
| cg16356528 | PI15     | chr8  | 0.582498679 | + T2D risk | Body    |
| cg20180629 | CUX1     | chr7  | 0.582527118 | - T2D risk | Body    |
| cg17280671 | ATP8A1   | chr4  | 0.582595598 | + T2D risk | Body    |
| cg09030592 | ST8SIA1  | chr12 | 0.582641793 | + T2D risk | 5'UTR   |
| cg09030592 | ST8SIA1  | chr12 | 0.582641793 | + T2D risk | Body    |
| cg00127725 | ST6GAL1  | chr3  | 0.582681993 | + T2D risk | Body    |
| cg10077239 | PRKD1    | chr14 | 0.582741583 | - T2D risk | TSS1500 |
| cg11820818 | PHF21A   | chr11 | 0.582761003 | + T2D risk | 5'UTR   |
| cg18083595 | USP29    | chr19 | 0.582794285 | - T2D risk | TSS1500 |
| cg08036668 | GALK2    | chr15 | 0.582814332 | - T2D risk | Body    |
| cg08036668 | GALK2    | chr15 | 0.582814332 | - T2D risk | TSS1500 |
| cg12833451 | CLASP2   | chr3  | 0.582928549 | - T2D risk | Body    |
| cg11778573 | CUX1     | chr7  | 0.582964105 | + T2D risk | Body    |
| cg17798175 | PACS1    | chr11 | 0.582988213 | + T2D risk | Body    |
| cg01278718 | PACS1    | chr11 | 0.583022263 | + T2D risk | Body    |
| cg19376807 | PICALM   | chr11 | 0.583078712 | + T2D risk | Body    |
| cg02154972 | KIAA1217 | chr10 | 0.583101057 | - T2D risk | 5'UTR   |
| cg15944762 | SPAG9    | chr17 | 0.583152278 | + T2D risk | 1stExon |
| cg25019847 | GRK5     | chr10 | 0.583202803 | - T2D risk | Body    |
| cg25871594 | RAP1GAP2 | chr17 | 0.583265507 | + T2D risk | Body    |
| cg08234256 | COL4A1   | chr13 | 0.583516806 | - T2D risk | Body    |
| cg23762306 | CREBBP   | chr16 | 0.583549375 | + T2D risk | Body    |
| cg15825617 | GALK2    | chr15 | 0.583563874 | + T2D risk | Body    |
| cg06835392 | CUX2     | chr12 | 0.583571891 | - T2D risk | Body    |
| cg09839914 | PPP1R12A | chr12 | 0.583616194 | - T2D risk | Body    |
| cg03424584 | CDK8     | chr13 | 0.583639583 | - T2D risk | Body    |
| cg15547162 | GALK2    | chr15 | 0.583670833 | - T2D risk | Body    |
| cg16023991 | TSC22D1  | chr13 | 0.583961703 | + T2D risk | Body    |
| cg08720527 | PTPRU    | chr1  | 0.583986917 | - T2D risk | Body    |
| cg11168904 | ATP8A1   | chr4  | 0.584001794 | + T2D risk | Body    |
| cg02182571 | USP53    | chr4  | 0.584026572 | - T2D risk | TSS1500 |
| cg26207423 | HMBOX1   | chr8  | 0.584102591 | + T2D risk | 5'UTR   |
| cg21820708 | CDH22    | chr20 | 0.584122327 | + T2D risk | Body    |
| cg01904227 | DNAJC1   | chr10 | 0.584166681 | - T2D risk | Body    |
| cg15814658 | SPAG9    | chr17 | 0.584301357 | - T2D risk | 5'UTR   |
| cg15814658 | SPAG9    | chr17 | 0.584301357 | - T2D risk | 1stExon |
| cg04975172 | TTC28    | chr22 | 0.58449029  | + T2D risk | Body    |
| cg13432154 | PRMT3    | chr11 | 0.584506847 | - T2D risk | TSS200  |
| cg09670276 | PCYT1A   | chr3  | 0.584552221 | - T2D risk | 5'UTR   |
| cg12591318 | TAZ      | chrX  | 0.584557587 | + T2D risk | ExonBnd |
| cg12591318 | TAZ      | chrX  | 0.584557587 | + T2D risk | Body    |
| cg10180848 | GRK5     | chr10 | 0.584624511 | + T2D risk | Body    |
| cg04434611 | PDLIM5   | chr4  | 0.584655434 | - T2D risk | 5'UTR   |
| cg04434611 | PDLIM5   | chr4  | 0.584655434 | - T2D risk | Body    |
| cg10610482 | NPAT     | chr11 | 0.584692296 | + T2D risk | Body    |
| cg08585518 | RSF1     | chr11 | 0.584732713 | + T2D risk | Body    |
| cg08585518 | RSF1     | chr11 | 0.584732713 | + T2D risk | ExonBnd |
| cg04926668 | PACS2    | chr14 | 0.584781833 | - T2D risk | Body    |
| cg14030258 | PTPRU    | chr1  | 0.584878862 | + T2D risk | Body    |
| cg12936255 | ST6GAL1  | chr3  | 0.584921433 | + T2D risk | 5'UTR   |



|            |          |       |             |            |         |
|------------|----------|-------|-------------|------------|---------|
| cg17817619 | PACRG    | chr6  | 0.58505903  | - T2D risk | TSS200  |
| cg17817619 | PACRG    | chr6  | 0.58505903  | - T2D risk | TSS1500 |
| cg08345526 | ITPKB    | chr1  | 0.585089858 | - T2D risk | Body    |
| cg01954514 | CHFR     | chr12 | 0.585096906 | - T2D risk | Body    |
| cg19703240 | CUX1     | chr7  | 0.585166146 | + T2D risk | Body    |
| cg00006301 | ANK3     | chr10 | 0.585185974 | + T2D risk | TSS200  |
| cg00006301 | ANK3     | chr10 | 0.585185974 | + T2D risk | Body    |
| cg03448612 | GAD1     | chr2  | 0.585280328 | + T2D risk | TSS1500 |
| cg02896222 | KREMEN1  | chr22 | 0.58537688  | - T2D risk | Body    |
| cg14802481 | MYO6     | chr6  | 0.585446489 | + T2D risk | Body    |
| cg16143378 | CADM1    | chr11 | 0.585500216 | + T2D risk | Body    |
| cg13671526 | ADCY5    | chr3  | 0.585520763 | - T2D risk | Body    |
| cg01379400 | AGPAT3   | chr21 | 0.58557681  | + T2D risk | Body    |
| cg03295552 | DIP2C    | chr10 | 0.585587005 | + T2D risk | Body    |
| cg19895185 | PACS2    | chr14 | 0.58567368  | - T2D risk | Body    |
| cg23423910 | KIAA1109 | chr4  | 0.585685022 | + T2D risk | Body    |
| cg15030415 | RAP1GAP2 | chr17 | 0.585733139 | - T2D risk | Body    |
| cg22221575 | PCYT1A   | chr3  | 0.585832656 | + T2D risk | 3'UTR   |
| cg21521683 | ST8SIA1  | chr12 | 0.585882642 | + T2D risk | TSS200  |
| cg08934607 | PRMT3    | chr11 | 0.586012495 | + T2D risk | Body    |
| cg08934607 | PRMT3    | chr11 | 0.586012495 | + T2D risk | 5'UTR   |
| cg08470863 | ROBO2    | chr3  | 0.586092224 | - T2D risk | Body    |
| cg18914215 | TPCN1    | chr12 | 0.586126819 | + T2D risk | TSS200  |
| cg24101578 | CDH22    | chr20 | 0.586131382 | + T2D risk | 1stExon |
| cg24101578 | CDH22    | chr20 | 0.586131382 | + T2D risk | 5'UTR   |
| cg01814572 | TENM2    | chr5  | 0.586246164 | + T2D risk | Body    |
| cg23380468 | PLAGL1   | chr6  | 0.586296344 | - T2D risk | 5'UTR   |
| cg23380468 | PLAGL1   | chr6  | 0.586296344 | - T2D risk | ExonBnd |
| cg18479322 | PACRG    | chr6  | 0.586312215 | - T2D risk | Body    |
| cg02558361 | ACTN4    | chr19 | 0.58636861  | + T2D risk | Body    |
| cg20559819 | SRPK2    | chr7  | 0.586374048 | + T2D risk | TSS200  |
| cg20559819 | SRPK2    | chr7  | 0.586374048 | + T2D risk | Body    |
| cg20559819 | SRPK2    | chr7  | 0.586374048 | + T2D risk | 5'UTR   |
| cg18804920 | CNTNAP2  | chr7  | 0.586383006 | - T2D risk | Body    |
| cg09279763 | GNA12    | chr7  | 0.586429204 | - T2D risk | Body    |
| cg07130623 | LMX1B    | chr9  | 0.586443262 | + T2D risk | Body    |
| cg08130736 | CDH22    | chr20 | 0.586510982 | - T2D risk | TSS1500 |
| cg10295298 | HMBX1    | chr8  | 0.586547385 | - T2D risk | Body    |
| cg20180059 | WDR47    | chr1  | 0.586562292 | - T2D risk | 5'UTR   |
| cg14731933 | TMEM150C | chr4  | 0.586591783 | - T2D risk | TSS200  |
| cg16594007 | USP29    | chr19 | 0.586657676 | + T2D risk | Body    |
| cg17229698 | SLIT3    | chr5  | 0.58672752  | - T2D risk | Body    |
| cg12655303 | ANK3     | chr10 | 0.586834843 | + T2D risk | Body    |
| cg18531559 | ULK4     | chr3  | 0.586945367 | + T2D risk | TSS200  |
| cg06751794 | TTC28    | chr22 | 0.586972395 | - T2D risk | Body    |
| cg13390630 | CDH22    | chr20 | 0.587668723 | + T2D risk | Body    |
| cg22021740 | APBA1    | chr9  | 0.587839776 | + T2D risk | 1stExon |
| cg22021740 | APBA1    | chr9  | 0.587839776 | + T2D risk | 5'UTR   |
| cg13589945 | SCAF8    | chr6  | 0.587926517 | + T2D risk | Body    |
| cg21802096 | ERC2     | chr3  | 0.587978069 | - T2D risk | Body    |
| cg24709263 | SPAG9    | chr17 | 0.587993402 | - T2D risk | Body    |
| cg20545410 | ITGB1    | chr10 | 0.588117945 | + T2D risk | 5'UTR   |
| cg21973527 | KDM4B    | chr19 | 0.588173347 | - T2D risk | Body    |
| cg12450135 | ATP8A2   | chr13 | 0.588183395 | + T2D risk | Body    |
| cg00036171 | SPAG9    | chr17 | 0.588229405 | + T2D risk | Body    |
| cg24181213 | IMPA1    | chr8  | 0.588312672 | - T2D risk | Body    |
| cg20148227 | ASH1L    | chr1  | 0.588346586 | + T2D risk | Body    |
| cg00250092 | ACSS2    | chr20 | 0.588379871 | - T2D risk | TSS1500 |
| cg25985144 | RBM4     | chr11 | 0.588386799 | - T2D risk | Body    |
| cg07839256 | RBBP6    | chr16 | 0.588420125 | - T2D risk | Body    |
| cg07839256 | RBBP6    | chr16 | 0.588420125 | - T2D risk | ExonBnd |
| cg01941253 | WIZ      | chr19 | 0.588432837 | + T2D risk | Body    |
| cg21647114 | CUX1     | chr7  | 0.588455939 | + T2D risk | Body    |
| cg00340225 | PRKCE    | chr2  | 0.588510352 | + T2D risk | Body    |
| cg04373017 | PRKAG2   | chr7  | 0.588521971 | + T2D risk | Body    |
| cg18864804 | ATRNL1   | chr10 | 0.588613087 | - T2D risk | Body    |
| cg23097277 | PPFIBP1  | chr12 | 0.588618659 | + T2D risk | TSS1500 |
| cg03247926 | FLT1     | chr13 | 0.588676509 | + T2D risk | TSS1500 |
| cg09851245 | ASH1L    | chr1  | 0.588703605 | + T2D risk | 5'UTR   |
| cg00639215 | MGRN1    | chr16 | 0.588720336 | - T2D risk | Body    |



|                |          |       |             |            |         |
|----------------|----------|-------|-------------|------------|---------|
| cg05682745     | SRPK2    | chr7  | 0.588729395 | - T2D risk | Body    |
| cg17070775     | NUP98    | chr11 | 0.588793099 | + T2D risk | Body    |
| cg05911659     | CPLX2    | chr5  | 0.588808649 | - T2D risk | 5'UTR   |
| cg05911659     | CPLX2    | chr5  | 0.588808649 | - T2D risk | 1stExon |
| cg17154701     | CADM1    | chr11 | 0.588848759 | - T2D risk | Body    |
| cg06172116     | ANKHD1   | chr5  | 0.589051768 | - T2D risk | Body    |
| cg14397918     | APBA1    | chr9  | 0.589068182 | - T2D risk | Body    |
| cg14731942     | INPP4A   | chr2  | 0.589162163 | + T2D risk | Body    |
| cg06847678     | ZRANB1   | chr10 | 0.589196461 | - T2D risk | TSS1500 |
| cg26587228     | USP29    | chr19 | 0.589271023 | + T2D risk | Body    |
| cg09038531     | PFKFB2   | chr1  | 0.589386038 | + T2D risk | ExonBnd |
| cg09038531     | PFKFB2   | chr1  | 0.589386038 | + T2D risk | Body    |
| cg22675660     | RAP1GAP2 | chr17 | 0.589402809 | - T2D risk | Body    |
| cg01020035     | DIP2C    | chr10 | 0.589681378 | - T2D risk | Body    |
| cg15777599     | NOTCH3   | chr19 | 0.590010865 | - T2D risk | ExonBnd |
| cg15777599     | NOTCH3   | chr19 | 0.590010865 | - T2D risk | Body    |
| cg02972093     | PTPRU    | chr1  | 0.590018979 | - T2D risk | Body    |
| cg09240436     | USP29    | chr19 | 0.590097016 | + T2D risk | TSS1500 |
| cg05789432     | SLIT3    | chr5  | 0.590177727 | + T2D risk | Body    |
| cg19046175     | TENM2    | chr5  | 0.590300375 | - T2D risk | Body    |
| cg22375856     | TBC1D5   | chr3  | 0.590350351 | + T2D risk | Body    |
| cg12687212     | PHACTR1  | chr6  | 0.590672838 | - T2D risk | Body    |
| cg00067702     | TENM2    | chr5  | 0.590800525 | - T2D risk | Body    |
| cg14712611     | ANK2     | chr4  | 0.590827083 | - T2D risk | 1stExon |
| cg14712611     | ANK2     | chr4  | 0.590827083 | - T2D risk | 5'UTR   |
| cg04274883     | PHACTR1  | chr6  | 0.590970734 | - T2D risk | Body    |
| cg10253902     | DACH1    | chr13 | 0.591266522 | - T2D risk | Body    |
| cg19175314     | USP53    | chr4  | 0.591277586 | + T2D risk | Body    |
| cg20293874     | TTC28    | chr22 | 0.591346877 | - T2D risk | Body    |
| cg20566776     | ITGA1    | chr5  | 0.591428576 | - T2D risk | Body    |
| cg23785771     | PRKAG2   | chr7  | 0.591451074 | + T2D risk | Body    |
| cg15548246     | PHACTR1  | chr6  | 0.591454411 | + T2D risk | Body    |
| cg22159468     | TJP1     | chr15 | 0.591511694 | + T2D risk | Body    |
| cg07315815     | PLEKHG3  | chr14 | 0.591547275 | + T2D risk | Body    |
| cg06637168     | PHF21A   | chr11 | 0.591580344 | + T2D risk | Body    |
| cg17495836     | SUB1     | chr5  | 0.59166564  | + T2D risk | 5'UTR   |
| cg05118636     | GALK2    | chr15 | 0.59171503  | - T2D risk | Body    |
| cg05118636     | GALK2    | chr15 | 0.59171503  | - T2D risk | TSS200  |
| cg03024546     | CLEC16A  | chr16 | 0.591755199 | + T2D risk | Body    |
| cg00651363     | KDM4B    | chr19 | 0.591795369 | - T2D risk | Body    |
| cg22625415     | ITGA1    | chr5  | 0.591908245 | + T2D risk | Body    |
| cg00977926     | ARL15    | chr5  | 0.591972862 | - T2D risk | Body    |
| cg24552660     | AGPAT3   | chr21 | 0.592061259 | + T2D risk | 3'UTR   |
| cg25798832     | KIAA0355 | chr19 | 0.592118483 | + T2D risk | 5'UTR   |
| cg24800810     | RGS7     | chr1  | 0.592141326 | - T2D risk | TSS1500 |
| cg09781768     | DIP2C    | chr10 | 0.592148286 | - T2D risk | Body    |
| cg26797263     | KIAA1217 | chr10 | 0.592220352 | + T2D risk | Body    |
| cg10379077     | CLEC16A  | chr16 | 0.592236552 | + T2D risk | Body    |
| cg00179576     | GLG1     | chr16 | 0.592336621 | - T2D risk | 3'UTR   |
| cg00179576     | GLG1     | chr16 | 0.592336621 | - T2D risk | Body    |
| cg19008597     | BCAT1    | chr12 | 0.5925762   | - T2D risk | TSS200  |
| cg24066742     | SEZ6L    | chr22 | 0.592615193 | + T2D risk | Body    |
| cg26251460     | CLEC16A  | chr16 | 0.592638057 | - T2D risk | Body    |
| cg26075933     | MEIS2    | chr15 | 0.592642227 | + T2D risk | Body    |
| cg21687610     | FNIP2    | chr4  | 0.592721674 | + T2D risk | Body    |
| cg12600072     | COL4A1   | chr13 | 0.592841553 | + T2D risk | Body    |
| cg14445459     | CPLX2    | chr5  | 0.592902205 | + T2D risk | 5'UTR   |
| cg08710739     | CUX2     | chr12 | 0.592930475 | + T2D risk | TSS1500 |
| ch.16.1684049R | GLG1     | chr16 | 0.593089434 | - T2D risk | Body    |
| cg11727338     | DIP2C    | chr10 | 0.593097502 | - T2D risk | Body    |
| cg16512239     | SPPL2A   | chr15 | 0.593126579 | - T2D risk | TSS200  |
| cg12690846     | ITPKB    | chr1  | 0.593137275 | - T2D risk | Body    |
| cg22539706     | KIAA1217 | chr10 | 0.593239419 | - T2D risk | Body    |
| cg11450831     | PPP1R12A | chr12 | 0.593328158 | - T2D risk | Body    |
| cg11375679     | EVI5     | chr1  | 0.593337176 | + T2D risk | Body    |
| cg27054608     | ULK4     | chr3  | 0.593427247 | + T2D risk | Body    |
| cg21718261     | NCOA2    | chr8  | 0.593452576 | - T2D risk | Body    |
| cg05134404     | SLC30A8  | chr8  | 0.593638351 | - T2D risk | TSS1500 |
| cg06197356     | MAN1A1   | chr6  | 0.593903274 | - T2D risk | Body    |
| cg21008776     | PRKCB    | chr16 | 0.59391792  | - T2D risk | Body    |



|            |          |       |             |            |         |
|------------|----------|-------|-------------|------------|---------|
| cg13217374 | ERC2     | chr3  | 0.593964853 | - T2D risk | Body    |
| cg06865501 | DNAJC13  | chr3  | 0.594037695 | + T2D risk | Body    |
| cg18581392 | CUX2     | chr12 | 0.59412616  | + T2D risk | Body    |
| cg01685977 | GLG1     | chr16 | 0.594259757 | - T2D risk | Body    |
| cg02134095 | ITGB1    | chr10 | 0.594328426 | + T2D risk | TSS1500 |
| cg23631322 | DYNC1I2  | chr2  | 0.594356054 | - T2D risk | TSS1500 |
| cg22430036 | CALD1    | chr7  | 0.594470793 | - T2D risk | Body    |
| cg02872232 | GPC4     | chrX  | 0.594483488 | - T2D risk | Body    |
| cg10952950 | ITPKB    | chr1  | 0.594522185 | + T2D risk | Body    |
| cg15621731 | KDM4B    | chr19 | 0.594543384 | + T2D risk | Body    |
| cg19203911 | SRPK2    | chr7  | 0.594545194 | + T2D risk | Body    |
| cg11908041 | PHACTR1  | chr6  | 0.594589112 | + T2D risk | Body    |
| cg04777988 | DDK2     | chr4  | 0.594729461 | + T2D risk | Body    |
| cg03185022 | GNA12    | chr7  | 0.594960067 | - T2D risk | TSS200  |
| cg12681329 | ANK3     | chr10 | 0.595010003 | - T2D risk | Body    |
| cg11974158 | ATRNL1   | chr10 | 0.595100483 | + T2D risk | Body    |
| cg17440417 | DIP2C    | chr10 | 0.595259364 | - T2D risk | Body    |
| cg14123409 | RAP1GAP2 | chr17 | 0.595353516 | + T2D risk | Body    |
| cg14233959 | GRK5     | chr10 | 0.595381767 | + T2D risk | Body    |
| cg19903156 | ST6GAL1  | chr3  | 0.595630148 | + T2D risk | 5'UTR   |
| cg14320220 | PCYT1A   | chr3  | 0.595637712 | - T2D risk | 5'UTR   |
| cg02021485 | PACS1    | chr11 | 0.595810774 | + T2D risk | Body    |
| cg25512177 | PRMT3    | chr11 | 0.595929506 | - T2D risk | TSS1500 |
| cg27291128 | NCOA7    | chr6  | 0.596024302 | + T2D risk | Body    |
| cg17773654 | KDM4B    | chr19 | 0.596209929 | - T2D risk | Body    |
| cg11697861 | WIZ      | chr19 | 0.596237799 | + T2D risk | 3'UTR   |
| cg24563011 | TBC1D5   | chr3  | 0.596496296 | + T2D risk | Body    |
| cg09400362 | TMEM131  | chr2  | 0.596609235 | - T2D risk | Body    |
| cg08732749 | DNAH9    | chr17 | 0.596646819 | + T2D risk | 5'UTR   |
| cg08732749 | DNAH9    | chr17 | 0.596646819 | + T2D risk | Body    |
| cg22247442 | ATRNL1   | chr10 | 0.596676225 | + T2D risk | Body    |
| cg10844578 | ENAH     | chr1  | 0.596750532 | - T2D risk | Body    |
| cg16721194 | CUX2     | chr12 | 0.596798372 | - T2D risk | Body    |
| cg19783291 | CUX1     | chr7  | 0.596848402 | + T2D risk | Body    |
| cg07276634 | SEZ6L    | chr22 | 0.596877018 | - T2D risk | Body    |
| cg23454082 | RTN4     | chr2  | 0.596908521 | - T2D risk | Body    |
| cg23454082 | RTN4     | chr2  | 0.596908521 | - T2D risk | 5'UTR   |
| cg15697820 | NPEPPS   | chr17 | 0.597026152 | - T2D risk | Body    |
| cg26110900 | ANK3     | chr10 | 0.597400163 | - T2D risk | Body    |
| cg05483534 | RHOQ     | chr2  | 0.59741328  | - T2D risk | Body    |
| cg00358092 | ERC2     | chr3  | 0.597509885 | - T2D risk | 3'UTR   |
| cg02819375 | PACS2    | chr14 | 0.597660336 | - T2D risk | Body    |
| cg27374572 | APC      | chr5  | 0.597694449 | - T2D risk | Body    |
| cg13378563 | KCNIP3   | chr2  | 0.59775681  | + T2D risk | Body    |
| cg20351160 | PDLIM5   | chr4  | 0.597807966 | + T2D risk | 5'UTR   |
| cg20351160 | PDLIM5   | chr4  | 0.597807966 | + T2D risk | Body    |
| cg14650610 | SPOCK1   | chr5  | 0.597848285 | - T2D risk | 5'UTR   |
| cg10335743 | DDC      | chr7  | 0.597857116 | - T2D risk | TSS1500 |
| cg10179984 | ANK2     | chr4  | 0.59803013  | - T2D risk | 5'UTR   |
| cg06773625 | ANK2     | chr4  | 0.598097001 | + T2D risk | Body    |
| cg15455539 | KIAA0355 | chr19 | 0.598134594 | + T2D risk | 3'UTR   |
| cg07291135 | DIP2C    | chr10 | 0.598135827 | + T2D risk | Body    |
| cg00765111 | TENM2    | chr5  | 0.598200581 | + T2D risk | Body    |
| cg06115214 | SPOCK1   | chr5  | 0.598335026 | + T2D risk | Body    |
| cg02587534 | PRKACB   | chr1  | 0.598536986 | - T2D risk | Body    |
| cg12083083 | DIP2C    | chr10 | 0.59854205  | - T2D risk | Body    |
| cg18059272 | CUX1     | chr7  | 0.598718706 | + T2D risk | Body    |
| cg04044936 | DIP2C    | chr10 | 0.598753365 | + T2D risk | Body    |
| cg23647784 | KIAA1217 | chr10 | 0.598796432 | + T2D risk | 5'UTR   |
| cg02086580 | CHFR     | chr12 | 0.59885602  | + T2D risk | Body    |
| cg10386105 | PRKCE    | chr2  | 0.598864403 | - T2D risk | Body    |
| cg15416440 | COL4A1   | chr13 | 0.599072575 | - T2D risk | Body    |
| cg03407756 | ATP6V1A  | chr3  | 0.599090586 | + T2D risk | TSS1500 |
| cg14342648 | CMTR1    | chr6  | 0.599104042 | - T2D risk | Body    |
| cg18219250 | ANK2     | chr4  | 0.599185352 | + T2D risk | 5'UTR   |
| cg05687930 | ENAH     | chr1  | 0.599237973 | - T2D risk | 1stExon |
| cg05687930 | ENAH     | chr1  | 0.599237973 | - T2D risk | 5'UTR   |
| cg06692211 | ARPP19   | chr15 | 0.59933978  | + T2D risk | TSS1500 |
| cg17815886 | PDLIM5   | chr4  | 0.599391756 | - T2D risk | Body    |
| cg03120983 | ST20     | chr15 | 0.599579881 | - T2D risk | Body    |



|               |          |       |             |            |         |
|---------------|----------|-------|-------------|------------|---------|
| cg03120983    | ST20     | chr15 | 0.599579881 | - T2D risk | 5'UTR   |
| cg20251943    | DIP2C    | chr10 | 0.599634294 | - T2D risk | Body    |
| cg13908149    | DIP2C    | chr10 | 0.59986439  | - T2D risk | Body    |
| cg27040423    | CHFR     | chr12 | 0.599877391 | - T2D risk | TSS1500 |
| cg13285181    | PLAGL1   | chr6  | 0.599935482 | - T2D risk | 5'UTR   |
| cg01142066    | KCNIP3   | chr2  | 0.599941732 | + T2D risk | Body    |
| cg04395875    | CUX2     | chr12 | 0.599978422 | - T2D risk | Body    |
| cg02329226    | PACS1    | chr11 | 0.600051781 | + T2D risk | Body    |
| cg17730623    | GLG1     | chr16 | 0.600079645 | + T2D risk | Body    |
| cg16410976    | ANK2     | chr4  | 0.600102582 | + T2D risk | Body    |
| cg26884705    | PTP4A2   | chr1  | 0.600109686 | + T2D risk | Body    |
| cg21293589    | PACRG    | chr6  | 0.600122928 | - T2D risk | Body    |
| cg03910065    | CADM1    | chr11 | 0.600249692 | - T2D risk | Body    |
| cg14481469    | PRKAG2   | chr7  | 0.600283258 | - T2D risk | Body    |
| cg07511721    | SLC29A4  | chr7  | 0.600455577 | + T2D risk | Body    |
| cg07884432    | LAMA4    | chr6  | 0.600605941 | - T2D risk | ExonBnd |
| cg07884432    | LAMA4    | chr6  | 0.600605941 | - T2D risk | Body    |
| cg07536328    | TIMM23   | chr10 | 0.6007187   | + T2D risk | 3'UTR   |
| cg19767048    | CLEC16A  | chr16 | 0.600833868 | - T2D risk | Body    |
| cg00096522    | DNAJC1   | chr10 | 0.600935769 | - T2D risk | Body    |
| cg18816170    | PHF21A   | chr11 | 0.600965781 | + T2D risk | 5'UTR   |
| cg02163033    | RCAN2    | chr6  | 0.601016222 | - T2D risk | 5'UTR   |
| cg06307939    | MAST1    | chr19 | 0.601085483 | + T2D risk | Body    |
| cg12652063    | DACH1    | chr13 | 0.601086352 | - T2D risk | TSS200  |
| cg08930413    | PRKAG2   | chr7  | 0.60110127  | + T2D risk | Body    |
| cg20230569    | DIP2C    | chr10 | 0.601147547 | + T2D risk | Body    |
| cg14053575    | CNTNAP2  | chr7  | 0.601303389 | + T2D risk | Body    |
| cg17219055    | SPPL2A   | chr15 | 0.60133157  | - T2D risk | Body    |
| cg09752223    | NOTCH3   | chr19 | 0.601397428 | - T2D risk | Body    |
| cg12300465    | SRPK2    | chr7  | 0.60162604  | - T2D risk | Body    |
| cg00693240    | MGRN1    | chr16 | 0.601759438 | - T2D risk | Body    |
| cg20769455    | ATP8A2   | chr13 | 0.60196013  | - T2D risk | Body    |
| cg01561777    | TSHZ1    | chr18 | 0.602013947 | - T2D risk | Body    |
| cg08790730    | NCOA2    | chr8  | 0.60203416  | - T2D risk | Body    |
| cg16457440    | GAD1     | chr2  | 0.602162955 | - T2D risk | Body    |
| cg07869907    | CDH22    | chr20 | 0.602204203 | + T2D risk | Body    |
| cg20618615    | DIP2C    | chr10 | 0.602222913 | - T2D risk | Body    |
| cg03598811    | LCA5     | chr6  | 0.602230462 | - T2D risk | TSS1500 |
| cg03664994    | RTN4     | chr2  | 0.602325622 | + T2D risk | Body    |
| cg00551455    | INPP4A   | chr2  | 0.602325882 | - T2D risk | Body    |
| cg01129966    | SVIP     | chr11 | 0.602423612 | - T2D risk | TSS200  |
| cg21859201    | NUP98    | chr11 | 0.602470004 | - T2D risk | Body    |
| cg22564026    | PACRG    | chr6  | 0.602490197 | - T2D risk | Body    |
| cg03504469    | LMX1B    | chr9  | 0.602542646 | + T2D risk | TSS1500 |
| ch.3.1226245F | ERC2     | chr3  | 0.602548908 | - T2D risk | Body    |
| cg14001161    | POLA1    | chrX  | 0.602551722 | - T2D risk | Body    |
| cg14211549    | ARPP19   | chr15 | 0.602683893 | + T2D risk | TSS1500 |
| cg01777212    | MET      | chr7  | 0.602855802 | + T2D risk | Body    |
| cg04327759    | PACS1    | chr11 | 0.603041968 | + T2D risk | Body    |
| cg01573089    | DIP2C    | chr10 | 0.60326483  | + T2D risk | Body    |
| cg10137676    | LAMA4    | chr6  | 0.603300947 | + T2D risk | Body    |
| cg04338128    | PRKCE    | chr2  | 0.603334601 | - T2D risk | Body    |
| cg14354881    | RAP1GAP2 | chr17 | 0.603336655 | + T2D risk | Body    |
| cg16907110    | KIAA1217 | chr10 | 0.603449026 | + T2D risk | Body    |
| cg02588499    | KREMEN1  | chr22 | 0.603467947 | - T2D risk | Body    |
| cg16884847    | PRKCE    | chr2  | 0.603468141 | + T2D risk | Body    |
| cg08393822    | UNC80    | chr2  | 0.603691221 | - T2D risk | Body    |
| cg12063580    | PACS2    | chr14 | 0.603765196 | - T2D risk | Body    |
| cg21105835    | POC1B    | chr12 | 0.603811142 | - T2D risk | TSS200  |
| cg21105835    | POC1B    | chr12 | 0.603811142 | - T2D risk | TSS1500 |
| cg16506970    | KIAA0232 | chr4  | 0.603837823 | + T2D risk | 5'UTR   |
| cg04961042    | PRKD1    | chr14 | 0.604009245 | + T2D risk | Body    |
| cg18585306    | TBC1D5   | chr3  | 0.604011244 | + T2D risk | 5'UTR   |
| cg18585306    | TBC1D5   | chr3  | 0.604011244 | + T2D risk | TSS1500 |
| cg23186959    | MEIS2    | chr15 | 0.604061301 | - T2D risk | 5'UTR   |
| cg23186959    | MEIS2    | chr15 | 0.604061301 | - T2D risk | 1stExon |
| cg23186959    | MEIS2    | chr15 | 0.604061301 | - T2D risk | Body    |
| cg23186959    | MEIS2    | chr15 | 0.604061301 | - T2D risk | TSS200  |
| cg23186959    | MEIS2    | chr15 | 0.604061301 | - T2D risk | TSS1500 |
| cg14491224    | PHACTR1  | chr6  | 0.604093851 | - T2D risk | Body    |



|            |          |       |             |            |         |
|------------|----------|-------|-------------|------------|---------|
| cg13928313 | GNA12    | chr7  | 0.604108235 | + T2D risk | Body    |
| cg24209738 | ATXN1    | chr6  | 0.60415038  | - T2D risk | 3'UTR   |
| cg23267224 | SEC31A   | chr4  | 0.60416045  | + T2D risk | Body    |
| cg00157109 | PRKAG2   | chr7  | 0.604190843 | + T2D risk | Body    |
| cg04420481 | ANK2     | chr4  | 0.604215195 | + T2D risk | Body    |
| cg08039562 | ATP8A2   | chr13 | 0.60427168  | - T2D risk | Body    |
| cg01404163 | TOX3     | chr16 | 0.604400727 | - T2D risk | TSS200  |
| cg01404163 | TOX3     | chr16 | 0.604400727 | - T2D risk | TSS1500 |
| cg11020333 | GNA12    | chr7  | 0.604485645 | + T2D risk | Body    |
| cg17569934 | NPEPPS   | chr17 | 0.604684485 | - T2D risk | Body    |
| cg13937817 | APBA1    | chr9  | 0.604738614 | + T2D risk | 5'UTR   |
| cg00178998 | PPFIBP1  | chr12 | 0.604853776 | - T2D risk | 5'UTR   |
| cg06273402 | ANK2     | chr4  | 0.604858283 | - T2D risk | Body    |
| cg06985664 | MET      | chr7  | 0.604878248 | + T2D risk | Body    |
| cg11722768 | ANK3     | chr10 | 0.604899703 | + T2D risk | Body    |
| cg05082805 | CNTNAP2  | chr7  | 0.604933425 | + T2D risk | Body    |
| cg01159576 | LMX1B    | chr9  | 0.605012196 | - T2D risk | Body    |
| cg20557071 | SGSM2    | chr17 | 0.605079765 | + T2D risk | Body    |
| cg09108394 | PRKCB    | chr16 | 0.605082994 | - T2D risk | Body    |
| cg14756271 | PRKCE    | chr2  | 0.605088478 | - T2D risk | Body    |
| cg25673720 | RNF157   | chr17 | 0.605438302 | + T2D risk | Body    |
| cg06651180 | CUX1     | chr7  | 0.605780185 | + T2D risk | Body    |
| cg22500102 | PFKFB2   | chr1  | 0.605888038 | - T2D risk | 5'UTR   |
| cg11886031 | ANK3     | chr10 | 0.606027399 | - T2D risk | Body    |
| cg04128563 | AMD1     | chr6  | 0.606151544 | - T2D risk | TSS1500 |
| cg00576027 | DNAH9    | chr17 | 0.606236975 | + T2D risk | TSS1500 |
| cg02428753 | KCNJ12   | chr17 | 0.606291678 | - T2D risk | TSS1500 |
| cg03157766 | NCOR1    | chr17 | 0.606385813 | - T2D risk | Body    |
| cg23327556 | SLIT3    | chr5  | 0.606422738 | + T2D risk | Body    |
| cg16547341 | USP29    | chr19 | 0.606456435 | - T2D risk | TSS1500 |
| cg04363087 | TENM2    | chr5  | 0.606506287 | - T2D risk | Body    |
| cg00089122 | PDE3A    | chr12 | 0.606586334 | + T2D risk | Body    |
| cg12354377 | ANK3     | chr10 | 0.606672658 | - T2D risk | TSS200  |
| cg19205498 | CHFR     | chr12 | 0.606685031 | - T2D risk | Body    |
| cg15643158 | ATXN1    | chr6  | 0.606724977 | - T2D risk | 3'UTR   |
| cg24084719 | ACTN4    | chr19 | 0.606729015 | - T2D risk | Body    |
| cg07904429 | SVIP     | chr11 | 0.606775896 | + T2D risk | TSS1500 |
| cg16025094 | CPLX2    | chr5  | 0.607027451 | + T2D risk | 5'UTR   |
| cg16025094 | CPLX2    | chr5  | 0.607027451 | + T2D risk | 1stExon |
| cg03662064 | FLT1     | chr13 | 0.60703559  | + T2D risk | TSS1500 |
| cg05148610 | PHF21A   | chr11 | 0.607222708 | + T2D risk | 3'UTR   |
| cg05048199 | FBXL2    | chr3  | 0.607273575 | + T2D risk | 5'UTR   |
| cg05048199 | FBXL2    | chr3  | 0.607273575 | + T2D risk | 1stExon |
| cg16959387 | PPFIBP1  | chr12 | 0.607274972 | - T2D risk | 5'UTR   |
| cg18961773 | RNF157   | chr17 | 0.607399541 | - T2D risk | Body    |
| cg10706073 | SKAP1    | chr17 | 0.607422227 | - T2D risk | Body    |
| cg03051880 | MAN1A1   | chr6  | 0.607479991 | - T2D risk | Body    |
| cg11137980 | SEMA3G   | chr3  | 0.607513878 | - T2D risk | 3'UTR   |
| cg02433807 | CLEC16A  | chr16 | 0.607758702 | - T2D risk | Body    |
| cg02447471 | DYNC111  | chr7  | 0.607775191 | + T2D risk | Body    |
| cg19961183 | TANC2    | chr17 | 0.607791195 | - T2D risk | Body    |
| cg17547544 | AGPAT3   | chr21 | 0.607809912 | - T2D risk | 5'UTR   |
| cg08964563 | MET      | chr7  | 0.608165627 | - T2D risk | 5'UTR   |
| cg13882278 | KIAA1217 | chr10 | 0.608496327 | - T2D risk | TSS200  |
| cg08988698 | RTN4     | chr2  | 0.608521897 | - T2D risk | Body    |
| cg06962875 | AGPAT3   | chr21 | 0.608544571 | + T2D risk | 5'UTR   |
| cg06755671 | CNTNAP2  | chr7  | 0.608581904 | + T2D risk | Body    |
| cg21177426 | MEIS2    | chr15 | 0.60861272  | + T2D risk | Body    |
| cg02237883 | RAP1GAP2 | chr17 | 0.608801197 | + T2D risk | Body    |
| cg05052687 | TTC28    | chr22 | 0.608977815 | - T2D risk | Body    |
| cg08646535 | PRKCE    | chr2  | 0.609028711 | + T2D risk | Body    |
| cg13006424 | TMEM131  | chr2  | 0.609159969 | + T2D risk | Body    |
| cg06897650 | MTHFS    | chr15 | 0.609316483 | - T2D risk | Body    |
| cg02178768 | CDH22    | chr20 | 0.609322305 | + T2D risk | Body    |
| cg03003544 | PRKCE    | chr2  | 0.609456225 | - T2D risk | Body    |
| cg05381331 | ARIH1    | chr15 | 0.60950372  | - T2D risk | TSS1500 |
| cg00379657 | CHFR     | chr12 | 0.609560111 | - T2D risk | Body    |
| cg15549075 | PRKCE    | chr2  | 0.609590306 | - T2D risk | Body    |
| cg22102964 | FBXL2    | chr3  | 0.609637967 | - T2D risk | Body    |
| cg05087909 | YWHAQ    | chr2  | 0.609804131 | + T2D risk | TSS200  |



|            |          |       |             |            |         |
|------------|----------|-------|-------------|------------|---------|
| cg15858897 | CHKA     | chr11 | 0.609834475 | - T2D risk | TSS200  |
| cg00056280 | GNA12    | chr7  | 0.609918945 | - T2D risk | Body    |
| cg00056280 | GNA12    | chr7  | 0.609918945 | - T2D risk | TSS200  |
| cg09540957 | TMEM131  | chr2  | 0.610047148 | - T2D risk | Body    |
| cg11223286 | DIP2C    | chr10 | 0.610053165 | + T2D risk | Body    |
| cg19065299 | RGS7     | chr1  | 0.610065391 | - T2D risk | Body    |
| cg23169604 | RGS7     | chr1  | 0.610203649 | - T2D risk | Body    |
| cg26548251 | CNTNAP2  | chr7  | 0.610252984 | + T2D risk | Body    |
| cg21356998 | ANK2     | chr4  | 0.610276244 | + T2D risk | Body    |
| cg06359059 | NQO1     | chr16 | 0.610462807 | + T2D risk | Body    |
| cg10709852 | ULK4     | chr3  | 0.610467646 | - T2D risk | Body    |
| cg01313180 | TOP2A    | chr17 | 0.610489337 | - T2D risk | TSS1500 |
| cg20063214 | PRKCE    | chr2  | 0.610733871 | - T2D risk | Body    |
| cg00459975 | HMBOX1   | chr8  | 0.610748721 | - T2D risk | 5'UTR   |
| cg15551781 | DIP2C    | chr10 | 0.610886951 | - T2D risk | 3'UTR   |
| cg26481896 | WWP2     | chr16 | 0.610888748 | - T2D risk | 3'UTR   |
| cg14286665 | FBXO11   | chr2  | 0.610926654 | - T2D risk | TSS200  |
| cg16230982 | PDE7A    | chr8  | 0.61100831  | - T2D risk | TSS1500 |
| cg16230982 | PDE7A    | chr8  | 0.61100831  | - T2D risk | Body    |
| cg24346263 | DIP2C    | chr10 | 0.611122782 | + T2D risk | Body    |
| cg02941852 | SRPK2    | chr7  | 0.611137356 | - T2D risk | TSS1500 |
| cg27546718 | DIP2C    | chr10 | 0.611192986 | + T2D risk | Body    |
| cg18437625 | CUX2     | chr12 | 0.611233509 | + T2D risk | Body    |
| cg17499682 | CDH22    | chr20 | 0.611289525 | - T2D risk | 5'UTR   |
| cg18617819 | WWP2     | chr16 | 0.611301657 | + T2D risk | Body    |
| cg06272854 | SVIP     | chr11 | 0.611334152 | + T2D risk | Body    |
| cg11780967 | ARL15    | chr5  | 0.611506536 | + T2D risk | Body    |
| cg09125977 | APBA1    | chr9  | 0.611541273 | + T2D risk | Body    |
| cg00203035 | MGRN1    | chr16 | 0.612039415 | + T2D risk | TSS200  |
| cg09390870 | GAD1     | chr2  | 0.612047941 | + T2D risk | Body    |
| cg10858353 | KDR      | chr4  | 0.61217942  | + T2D risk | 3'UTR   |
| cg07459489 | SLC30A8  | chr8  | 0.612265483 | - T2D risk | TSS200  |
| cg07791058 | PPP1R12A | chr12 | 0.612283074 | + T2D risk | Body    |
| cg07791058 | PPP1R12A | chr12 | 0.612283074 | + T2D risk | 5'UTR   |
| cg26763365 | PLEKHG3  | chr14 | 0.612335437 | + T2D risk | 5'UTR   |
| cg21475065 | CNTNAP2  | chr7  | 0.612398771 | - T2D risk | Body    |
| cg03306374 | PRKCB    | chr16 | 0.612453718 | - T2D risk | 5'UTR   |
| cg03306374 | PRKCB    | chr16 | 0.612453718 | - T2D risk | 1stExon |
| cg00168439 | ERC2     | chr3  | 0.612573712 | + T2D risk | Body    |
| cg22794803 | TPCN1    | chr12 | 0.612618977 | - T2D risk | Body    |
| cg17870553 | PLAGL1   | chr6  | 0.612619864 | + T2D risk | 5'UTR   |
| cg23621335 | PACS1    | chr11 | 0.6126262   | + T2D risk | Body    |
| cg00395230 | CLEC16A  | chr16 | 0.612640299 | + T2D risk | Body    |
| cg22214259 | RHBDD1   | chr2  | 0.612645221 | - T2D risk | 5'UTR   |
| cg13516624 | ITGB1    | chr10 | 0.612715415 | + T2D risk | Body    |
| cg25147866 | STX6     | chr1  | 0.612896851 | - T2D risk | TSS200  |
| cg02531277 | CUX1     | chr7  | 0.612927464 | + T2D risk | Body    |
| cg15878839 | SKAP1    | chr17 | 0.613073245 | - T2D risk | Body    |
| cg03103158 | HMBOX1   | chr8  | 0.613090532 | + T2D risk | 5'UTR   |
| cg03103158 | HMBOX1   | chr8  | 0.613090532 | + T2D risk | TSS200  |
| cg01010931 | CREBBP   | chr16 | 0.613163484 | + T2D risk | Body    |
| cg16928427 | PI15     | chr8  | 0.613207451 | - T2D risk | 3'UTR   |
| cg20917241 | COL4A1   | chr13 | 0.613227257 | + T2D risk | Body    |
| cg21642054 | CUX1     | chr7  | 0.613289    | - T2D risk | Body    |
| cg13908395 | WDR47    | chr1  | 0.613300041 | - T2D risk | TSS1500 |
| cg16457876 | CLEC16A  | chr16 | 0.613491346 | + T2D risk | Body    |
| cg14186145 | DNAJC13  | chr3  | 0.613736271 | + T2D risk | Body    |
| cg15663265 | MAST1    | chr19 | 0.613828126 | + T2D risk | Body    |
| cg05153682 | ZHX2     | chr8  | 0.613899315 | + T2D risk | 5'UTR   |
| cg02202052 | PDE3A    | chr12 | 0.6139939   | - T2D risk | Body    |
| cg19429538 | CLOCK    | chr4  | 0.614139647 | + T2D risk | Body    |
| cg19071854 | CUX2     | chr12 | 0.614336599 | - T2D risk | Body    |
| cg14468640 | NUP98    | chr11 | 0.614401446 | - T2D risk | Body    |
| cg01450705 | CPLX2    | chr5  | 0.61451398  | - T2D risk | 5'UTR   |
| cg22877969 | FLT1     | chr13 | 0.614534497 | + T2D risk | Body    |
| cg01655671 | LAMA4    | chr6  | 0.614602204 | - T2D risk | Body    |
| cg27437966 | FAM155B  | chrX  | 0.614778303 | + T2D risk | Body    |
| cg21642050 | PRKAG2   | chr7  | 0.614827378 | + T2D risk | Body    |
| cg09029124 | PRKAG2   | chr7  | 0.614886104 | + T2D risk | Body    |
| cg03460001 | CUX1     | chr7  | 0.614963721 | - T2D risk | Body    |



|            |                |       |             |            |         |
|------------|----------------|-------|-------------|------------|---------|
| cg15437444 | <i>FBXL2</i>   | chr3  | 0.615076785 | - T2D risk | Body    |
| cg02474265 | <i>ATP8A2</i>  | chr13 | 0.615142758 | - T2D risk | Body    |
| cg23494893 | <i>ITGA1</i>   | chr5  | 0.6152285   | + T2D risk | Body    |
| cg01312837 | <i>CREBBP</i>  | chr16 | 0.615334289 | - T2D risk | Body    |
| cg13891250 | <i>CLASP2</i>  | chr3  | 0.615412598 | - T2D risk | Body    |
| cg01330316 | <i>CLIC5</i>   | chr6  | 0.615484374 | + T2D risk | Body    |
| cg24806831 | <i>INPP4A</i>  | chr2  | 0.615606406 | + T2D risk | Body    |
| cg06560836 | <i>NF1</i>     | chr17 | 0.615611543 | + T2D risk | Body    |
| cg09032537 | <i>CDH22</i>   | chr20 | 0.615704434 | + T2D risk | Body    |
| cg17780935 | <i>PRKACB</i>  | chr1  | 0.615774332 | - T2D risk | Body    |
| cg17780935 | <i>PRKACB</i>  | chr1  | 0.615774332 | - T2D risk | TSS1500 |
| cg25214924 | <i>PACRG</i>   | chr6  | 0.615800823 | + T2D risk | Body    |
| cg27423357 | <i>FLT1</i>    | chr13 | 0.615866133 | - T2D risk | Body    |
| cg27423357 | <i>FLT1</i>    | chr13 | 0.615866133 | - T2D risk | 3'UTR   |
| cg05092387 | <i>MEIS2</i>   | chr15 | 0.615885966 | + T2D risk | Body    |
| cg04982834 | <i>EVI5</i>    | chr1  | 0.615925721 | + T2D risk | TSS1500 |
| cg06922858 | <i>FARSB</i>   | chr2  | 0.616027008 | + T2D risk | Body    |
| cg05431598 | <i>NDUFB3</i>  | chr2  | 0.616054182 | - T2D risk | Body    |
| cg26007540 | <i>TOP2A</i>   | chr17 | 0.616061903 | - T2D risk | TSS1500 |
| cg15625092 | <i>CUX1</i>    | chr7  | 0.616095511 | - T2D risk | Body    |
| cg00175180 | <i>CDH22</i>   | chr20 | 0.616386439 | + T2D risk | Body    |
| cg25484135 | <i>CDH22</i>   | chr20 | 0.616505691 | - T2D risk | ExonBnd |
| cg25484135 | <i>CDH22</i>   | chr20 | 0.616505691 | - T2D risk | Body    |
| cg25154733 | <i>FLT1</i>    | chr13 | 0.616621081 | - T2D risk | Body    |
| cg08683939 | <i>CCNB1</i>   | chr5  | 0.616644403 | - T2D risk | TSS1500 |
| cg27084026 | <i>CHFR</i>    | chr12 | 0.616656116 | + T2D risk | TSS1500 |
| cg03610729 | <i>SLIT3</i>   | chr5  | 0.616712458 | - T2D risk | Body    |
| cg14876102 | <i>SLC29A4</i> | chr7  | 0.616795557 | + T2D risk | Body    |
| cg18114450 | <i>CLEC16A</i> | chr16 | 0.616969928 | - T2D risk | Body    |
| cg27375135 | <i>DIP2C</i>   | chr10 | 0.61698981  | + T2D risk | Body    |
| cg17665652 | <i>ANK2</i>    | chr4  | 0.617021154 | + T2D risk | Body    |
| cg06413426 | <i>CUX2</i>    | chr12 | 0.617127874 | - T2D risk | Body    |
| cg16450654 | <i>KCNIP3</i>  | chr2  | 0.617167268 | + T2D risk | Body    |
| cg13612543 | <i>ANK3</i>    | chr10 | 0.617251637 | + T2D risk | TSS1500 |
| cg08859787 | <i>MTHFS</i>   | chr15 | 0.617263123 | + T2D risk | TSS1500 |
| cg01884589 | <i>ULK4</i>    | chr3  | 0.617270658 | + T2D risk | Body    |
| cg19612376 | <i>CUX2</i>    | chr12 | 0.617309877 | - T2D risk | Body    |
| cg26375570 | <i>CPLX2</i>   | chr5  | 0.617390269 | + T2D risk | 5'UTR   |
| cg26375570 | <i>CPLX2</i>   | chr5  | 0.617390269 | + T2D risk | 1stExon |
| cg05032498 | <i>GAD1</i>    | chr2  | 0.61741318  | + T2D risk | 5'UTR   |
| cg13672817 | <i>KREMEN1</i> | chr22 | 0.617415119 | - T2D risk | Body    |
| cg15722376 | <i>ERC2</i>    | chr3  | 0.617425517 | + T2D risk | Body    |
| cg16430099 | <i>MAN1A2</i>  | chr1  | 0.617449146 | + T2D risk | Body    |
| cg26895220 | <i>PDE8A</i>   | chr15 | 0.617460343 | + T2D risk | 5'UTR   |
| cg26895220 | <i>PDE8A</i>   | chr15 | 0.617460343 | + T2D risk | Body    |
| cg02673355 | <i>COL4A1</i>  | chr13 | 0.61747681  | + T2D risk | Body    |
| cg26896179 | <i>FBXO11</i>  | chr2  | 0.617482855 | + T2D risk | Body    |
| cg08033142 | <i>PRKCE</i>   | chr2  | 0.617494043 | + T2D risk | Body    |
| cg11176058 | <i>ADCY5</i>   | chr3  | 0.617605647 | + T2D risk | Body    |
| cg15837623 | <i>COL4A1</i>  | chr13 | 0.617641432 | - T2D risk | Body    |
| cg01473729 | <i>CHID1</i>   | chr11 | 0.617776942 | - T2D risk | Body    |
| cg07053851 | <i>TANC2</i>   | chr17 | 0.617841238 | + T2D risk | Body    |
| cg25669851 | <i>CUX1</i>    | chr7  | 0.617888766 | + T2D risk | Body    |
| cg13274437 | <i>CUX2</i>    | chr12 | 0.617894901 | + T2D risk | Body    |
| cg11935459 | <i>GALK2</i>   | chr15 | 0.617944328 | - T2D risk | Body    |
| cg08203192 | <i>PRKCE</i>   | chr2  | 0.617968203 | - T2D risk | Body    |
| cg18379819 | <i>TMEM131</i> | chr2  | 0.618075046 | - T2D risk | Body    |
| cg24137710 | <i>CUX1</i>    | chr7  | 0.618253254 | + T2D risk | Body    |
| cg01382567 | <i>POC1B</i>   | chr12 | 0.618290176 | - T2D risk | Body    |
| cg01382567 | <i>POC1B</i>   | chr12 | 0.618290176 | - T2D risk | 5'UTR   |
| cg12990844 | <i>SSB</i>     | chr2  | 0.61829282  | - T2D risk | TSS200  |
| cg14471723 | <i>ATP8A2</i>  | chr13 | 0.618377557 | - T2D risk | ExonBnd |
| cg14471723 | <i>ATP8A2</i>  | chr13 | 0.618377557 | - T2D risk | Body    |
| cg09647340 | <i>PRKCE</i>   | chr2  | 0.618458712 | - T2D risk | Body    |
| cg05837041 | <i>DIP2C</i>   | chr10 | 0.618684864 | - T2D risk | Body    |
| cg19126603 | <i>RBM4</i>    | chr11 | 0.618760796 | + T2D risk | 5'UTR   |
| cg05797501 | <i>ITGA1</i>   | chr5  | 0.618789179 | + T2D risk | Body    |
| cg24383674 | <i>RANBP17</i> | chr5  | 0.618959836 | - T2D risk | Body    |
| cg21921619 | <i>ATRNL1</i>  | chr10 | 0.618976351 | - T2D risk | TSS1500 |
| cg03473270 | <i>TENM2</i>   | chr5  | 0.618984142 | + T2D risk | TSS1500 |



|            |          |       |             |            |         |
|------------|----------|-------|-------------|------------|---------|
| cg01196404 | ARL15    | chr5  | 0.619148719 | - T2D risk | TSS200  |
| cg26247093 | GNA12    | chr7  | 0.619158929 | + T2D risk | Body    |
| cg01484826 | DIP2C    | chr10 | 0.619340062 | - T2D risk | Body    |
| cg27266970 | CNTROB   | chr17 | 0.619492538 | - T2D risk | TSS1500 |
| cg03143236 | GRK5     | chr10 | 0.6194976   | + T2D risk | Body    |
| cg01222298 | TANC2    | chr17 | 0.619655406 | - T2D risk | Body    |
| cg15905865 | DIP2C    | chr10 | 0.619709984 | + T2D risk | Body    |
| cg02493614 | PDK1     | chr2  | 0.61972321  | + T2D risk | Body    |
| cg16373820 | AGPAT3   | chr21 | 0.619763562 | + T2D risk | 5'UTR   |
| cg04044684 | CHFR     | chr12 | 0.619783924 | + T2D risk | TSS1500 |
| cg01028600 | PRKCE    | chr2  | 0.619801074 | + T2D risk | Body    |
| cg08265392 | PRKAG2   | chr7  | 0.619849408 | + T2D risk | Body    |
| cg15473052 | KIAA1217 | chr10 | 0.619869686 | + T2D risk | 5'UTR   |
| cg15473052 | KIAA1217 | chr10 | 0.619869686 | + T2D risk | Body    |
| cg09716042 | PACS2    | chr14 | 0.619881162 | - T2D risk | TSS1500 |
| cg03773192 | GRK5     | chr10 | 0.619952683 | + T2D risk | TSS1500 |
| cg22587773 | LMCD1    | chr3  | 0.619956476 | + T2D risk | 5'UTR   |
| cg22587773 | LMCD1    | chr3  | 0.619956476 | + T2D risk | Body    |
| cg03314365 | ZHX2     | chr8  | 0.619959735 | - T2D risk | 5'UTR   |
| cg16693212 | NPAT     | chr11 | 0.620026578 | - T2D risk | 1stExon |
| cg15733165 | CDH22    | chr20 | 0.620054785 | + T2D risk | Body    |
| cg04720886 | CNTNAP2  | chr7  | 0.620233273 | - T2D risk | Body    |
| cg15679799 | GALK2    | chr15 | 0.620235488 | + T2D risk | Body    |
| cg00244328 | ATP8A1   | chr4  | 0.620306905 | + T2D risk | TSS1500 |
| cg21819383 | PRKCE    | chr2  | 0.62031585  | + T2D risk | Body    |
| cg27524361 | TSGA10   | chr2  | 0.620320241 | - T2D risk | 5'UTR   |
| cg15593382 | PRKACB   | chr1  | 0.620333966 | - T2D risk | Body    |
| cg15593382 | PRKACB   | chr1  | 0.620333966 | - T2D risk | TSS200  |
| cg19766638 | NOL4     | chr18 | 0.62041991  | - T2D risk | 5'UTR   |
| cg19766638 | NOL4     | chr18 | 0.62041991  | - T2D risk | Body    |
| cg19766638 | NOL4     | chr18 | 0.62041991  | - T2D risk | 1stExon |
| cg20627874 | ITPKB    | chr1  | 0.620421321 | - T2D risk | Body    |
| cg07343445 | PACRG    | chr6  | 0.620452456 | + T2D risk | Body    |
| cg01139080 | PCYT1A   | chr3  | 0.620471054 | + T2D risk | Body    |
| cg16253629 | ANK2     | chr4  | 0.620615294 | - T2D risk | 5'UTR   |
| cg06761398 | CLASP2   | chr3  | 0.620656226 | + T2D risk | Body    |
| cg06761398 | CLASP2   | chr3  | 0.620656226 | + T2D risk | TSS1500 |
| cg00271211 | DIP2C    | chr10 | 0.620855331 | - T2D risk | Body    |
| cg20626869 | ATP6V1H  | chr8  | 0.620927268 | + T2D risk | Body    |
| cg21322436 | CNTNAP2  | chr7  | 0.620974424 | + T2D risk | TSS1500 |
| cg17771031 | CDH22    | chr20 | 0.621038874 | - T2D risk | Body    |
| cg19524238 | GNA12    | chr7  | 0.621088526 | - T2D risk | Body    |
| cg09490604 | RET      | chr10 | 0.621129222 | + T2D risk | Body    |
| cg20057752 | TENM2    | chr5  | 0.621337703 | - T2D risk | Body    |
| cg25916307 | KREMEN1  | chr22 | 0.621375495 | - T2D risk | TSS1500 |
| cg22001632 | CALD1    | chr7  | 0.621471383 | - T2D risk | 5'UTR   |
| cg02710090 | PFKFB2   | chr1  | 0.621620374 | + T2D risk | TSS1500 |
| cg11631450 | TENM2    | chr5  | 0.621631022 | + T2D risk | Body    |
| cg14047656 | NDUFB3   | chr2  | 0.62171639  | + T2D risk | 5'UTR   |
| cg14047656 | NDUFB3   | chr2  | 0.62171639  | + T2D risk | 1stExon |
| cg19016171 | CADM1    | chr11 | 0.621777929 | - T2D risk | Body    |
| cg08608974 | PRKD1    | chr14 | 0.621849038 | + T2D risk | 5'UTR   |
| cg08608974 | PRKD1    | chr14 | 0.621849038 | + T2D risk | 1stExon |
| cg18029381 | ATXN1    | chr6  | 0.62185989  | - T2D risk | 5'UTR   |
| cg24248713 | NOL4     | chr18 | 0.62192573  | - T2D risk | TSS200  |
| cg06665788 | PACS1    | chr11 | 0.621936273 | - T2D risk | Body    |
| cg03895695 | MEIS2    | chr15 | 0.621946028 | - T2D risk | Body    |
| cg02726729 | MET      | chr7  | 0.621954971 | - T2D risk | Body    |
| cg16689724 | LAMA4    | chr6  | 0.622014824 | - T2D risk | 3'UTR   |
| cg20124815 | SH3GL2   | chr9  | 0.622256048 | - T2D risk | Body    |
| cg26929355 | WWP2     | chr16 | 0.622323664 | - T2D risk | 5'UTR   |
| cg26929355 | WWP2     | chr16 | 0.622323664 | - T2D risk | Body    |
| cg26333902 | SLC7A2   | chr8  | 0.62234675  | - T2D risk | 5'UTR   |
| cg26333902 | SLC7A2   | chr8  | 0.62234675  | - T2D risk | 1stExon |
| cg19203304 | COL4A1   | chr13 | 0.622370239 | - T2D risk | Body    |
| cg16037981 | RAP1GAP2 | chr17 | 0.622467022 | + T2D risk | Body    |
| cg16590189 | CPLX2    | chr5  | 0.62258985  | + T2D risk | 5'UTR   |
| cg21959457 | NUF2     | chr1  | 0.62280271  | + T2D risk | TSS1500 |
| cg03893240 | KIAA0232 | chr4  | 0.622863994 | + T2D risk | Body    |
| cg09345144 | CLEC16A  | chr16 | 0.622940616 | - T2D risk | Body    |



|            |          |       |             |            |         |
|------------|----------|-------|-------------|------------|---------|
| cg13465826 | NCOR1    | chr17 | 0.623154965 | - T2D risk | 5'UTR   |
| cg05296508 | CLEC16A  | chr16 | 0.623183316 | - T2D risk | Body    |
| cg03150234 | ITPKB    | chr1  | 0.623476    | + T2D risk | Body    |
| cg23718806 | EVI5     | chr1  | 0.623575707 | - T2D risk | Body    |
| cg14527148 | ST20     | chr15 | 0.623674293 | + T2D risk | TSS1500 |
| cg27577583 | PLAGL1   | chr6  | 0.623701853 | + T2D risk | 5'UTR   |
| cg09422531 | KCNJ18   | chr17 | 0.623756619 | + T2D risk | TSS1500 |
| cg09422531 | KCNJ12   | chr17 | 0.623756619 | + T2D risk | 5'UTR   |
| cg13061350 | ENAH     | chr1  | 0.623865238 | - T2D risk | 1stExon |
| cg13061350 | ENAH     | chr1  | 0.623865238 | - T2D risk | 5'UTR   |
| cg06058311 | EFR3A    | chr8  | 0.623871862 | - T2D risk | TSS1500 |
| cg05013730 | CNTNAP2  | chr7  | 0.623969243 | + T2D risk | Body    |
| cg27003212 | ITGA1    | chr5  | 0.623991006 | + T2D risk | Body    |
| cg03584382 | EVI5     | chr1  | 0.624074876 | - T2D risk | Body    |
| cg10428661 | NCOR1    | chr17 | 0.62409388  | + T2D risk | TSS1500 |
| cg17440909 | FLT1     | chr13 | 0.62419711  | + T2D risk | Body    |
| cg17612853 | ATP6V1A  | chr3  | 0.624219638 | + T2D risk | TSS1500 |
| cg04370088 | INPP4A   | chr2  | 0.624221393 | + T2D risk | 5'UTR   |
| cg18836626 | ATP8A2   | chr13 | 0.624280399 | + T2D risk | Body    |
| cg19294816 | ST20     | chr15 | 0.624367375 | + T2D risk | 5'UTR   |
| cg15706574 | RCAN2    | chr6  | 0.624425122 | - T2D risk | Body    |
| cg25741744 | ULK4     | chr3  | 0.624558349 | - T2D risk | Body    |
| cg08844365 | LAMA4    | chr6  | 0.624674347 | + T2D risk | TSS1500 |
| cg07136635 | ITGA1    | chr5  | 0.624682278 | + T2D risk | Body    |
| cg01450696 | DYNC111  | chr7  | 0.624719109 | + T2D risk | TSS200  |
| cg02381317 | PACS1    | chr11 | 0.624730219 | + T2D risk | Body    |
| cg06538549 | ITGB1    | chr10 | 0.624796811 | - T2D risk | 5'UTR   |
| cg06067846 | TTC28    | chr22 | 0.624807574 | - T2D risk | Body    |
| cg18637291 | ERC2     | chr3  | 0.624919614 | + T2D risk | Body    |
| cg16719385 | SVIP     | chr11 | 0.625026458 | + T2D risk | Body    |
| cg18593039 | PLAGL1   | chr6  | 0.625061646 | + T2D risk | TSS1500 |
| cg18593039 | PLAGL1   | chr6  | 0.625061646 | + T2D risk | 5'UTR   |
| cg17559206 | CREBBP   | chr16 | 0.625151247 | - T2D risk | Body    |
| cg09460267 | MEIS2    | chr15 | 0.625241214 | + T2D risk | Body    |
| cg23360682 | SRPK2    | chr7  | 0.625398324 | - T2D risk | Body    |
| cg25725999 | PLEKHG3  | chr14 | 0.625440278 | + T2D risk | 5'UTR   |
| cg09949146 | DIP2C    | chr10 | 0.625528431 | - T2D risk | Body    |
| cg10975399 | ERC2     | chr3  | 0.625874726 | - T2D risk | Body    |
| cg12509026 | KIAA1217 | chr10 | 0.626000891 | + T2D risk | TSS1500 |
| cg12509026 | KIAA1217 | chr10 | 0.626000891 | + T2D risk | 5'UTR   |
| cg12509026 | KIAA1217 | chr10 | 0.626000891 | + T2D risk | Body    |
| cg23202388 | CHID1    | chr11 | 0.626117464 | - T2D risk | 1stExon |
| cg23202388 | CHID1    | chr11 | 0.626117464 | - T2D risk | 5'UTR   |
| cg02856420 | CUX1     | chr7  | 0.626869414 | + T2D risk | Body    |
| cg08606786 | PRKAG2   | chr7  | 0.626905143 | + T2D risk | Body    |
| cg08732561 | GRK5     | chr10 | 0.62704357  | - T2D risk | Body    |
| cg22158639 | CDH22    | chr20 | 0.627056293 | + T2D risk | Body    |
| cg09734568 | SCAF11   | chr12 | 0.627302557 | - T2D risk | Body    |
| cg03106852 | LAMA4    | chr6  | 0.627329893 | - T2D risk | Body    |
| cg26072213 | ITGA1    | chr5  | 0.627330646 | - T2D risk | Body    |
| cg03574882 | PRKAG2   | chr7  | 0.627403566 | - T2D risk | TSS200  |
| cg24088685 | CCNB1    | chr5  | 0.627414428 | + T2D risk | TSS200  |
| cg25445431 | CUX1     | chr7  | 0.627447481 | + T2D risk | Body    |
| cg07136998 | SLIT3    | chr5  | 0.62763243  | - T2D risk | 1stExon |
| cg07136998 | SLIT3    | chr5  | 0.62763243  | - T2D risk | 5'UTR   |
| cg09670925 | CADM1    | chr11 | 0.627653468 | - T2D risk | Body    |
| cg01544333 | RAP1GAP2 | chr17 | 0.627660088 | + T2D risk | Body    |
| cg01954337 | NUP98    | chr11 | 0.627708312 | + T2D risk | TSS200  |
| cg00775425 | PRKACB   | chr1  | 0.627729048 | - T2D risk | Body    |
| cg00775425 | PRKACB   | chr1  | 0.627729048 | - T2D risk | TSS200  |
| cg01611748 | MAN1A1   | chr6  | 0.627888065 | + T2D risk | 5'UTR   |
| cg06815950 | CUX2     | chr12 | 0.627918794 | - T2D risk | Body    |
| cg08121890 | EFR3A    | chr8  | 0.627942866 | + T2D risk | Body    |
| cg12407978 | LYVE1    | chr11 | 0.627956    | - T2D risk | 5'UTR   |
| cg12407978 | LYVE1    | chr11 | 0.627956    | - T2D risk | 1stExon |
| cg01039154 | TENM2    | chr5  | 0.628049768 | - T2D risk | Body    |
| cg20852535 | CLEC16A  | chr16 | 0.628194018 | + T2D risk | Body    |
| cg08924488 | ATP6V1A  | chr3  | 0.628380526 | - T2D risk | TSS1500 |
| cg23249868 | GNA12    | chr7  | 0.628511996 | + T2D risk | Body    |
| cg21743616 | NPEPPS   | chr17 | 0.628616471 | + T2D risk | Body    |



|               |          |       |             |            |         |
|---------------|----------|-------|-------------|------------|---------|
| cg21743616    | NPEPPS   | chr17 | 0.628616471 | + T2D risk | ExonBnd |
| cg16235197    | CUX2     | chr12 | 0.628718832 | - T2D risk | Body    |
| cg19030123    | CLEC16A  | chr16 | 0.628928442 | + T2D risk | Body    |
| cg01988452    | EIF1AY   | chrY  | 0.629012098 | + T2D risk | TSS1500 |
| cg00860090    | ITPKB    | chr1  | 0.629012847 | - T2D risk | Body    |
| cg00744145    | SLC29A4  | chr7  | 0.629019936 | + T2D risk | 5'UTR   |
| cg01603311    | RNF157   | chr17 | 0.629142372 | - T2D risk | Body    |
| cg25219591    | SMG7     | chr1  | 0.629275126 | + T2D risk | 5'UTR   |
| cg25219591    | SMG7     | chr1  | 0.629275126 | + T2D risk | Body    |
| cg22308600    | NOL4     | chr18 | 0.629670859 | + T2D risk | Body    |
| cg22308600    | NOL4     | chr18 | 0.629670859 | + T2D risk | TSS200  |
| cg18836267    | PPFIBP1  | chr12 | 0.629716142 | + T2D risk | TSS200  |
| cg09792612    | AGPAT3   | chr21 | 0.629757121 | - T2D risk | 5'UTR   |
| cg01391297    | ASH1L    | chr1  | 0.629772363 | + T2D risk | 5'UTR   |
| cg19561607    | BCAT1    | chr12 | 0.629823539 | + T2D risk | TSS1500 |
| cg17869960    | PHACTR1  | chr6  | 0.629841245 | + T2D risk | 5'UTR   |
| cg01991180    | NPAT     | chr11 | 0.629962605 | + T2D risk | Body    |
| cg00756450    | GALK2    | chr15 | 0.629972018 | + T2D risk | Body    |
| cg01895882    | SKAP1    | chr17 | 0.630213143 | + T2D risk | Body    |
| cg12149609    | JPH2     | chr20 | 0.630258051 | - T2D risk | TSS1500 |
| cg26060583    | NCOA2    | chr8  | 0.630468832 | - T2D risk | 5'UTR   |
| cg18122056    | TANC2    | chr17 | 0.630481066 | - T2D risk | Body    |
| cg07846348    | TENM2    | chr5  | 0.63061087  | - T2D risk | Body    |
| cg12318408    | RAP1GAP2 | chr17 | 0.630626629 | - T2D risk | 1stExon |
| cg12318408    | RAP1GAP2 | chr17 | 0.630626629 | - T2D risk | 5'UTR   |
| cg06418002    | ENAH     | chr1  | 0.630661452 | + T2D risk | 3'UTR   |
| cg00479347    | PACS2    | chr14 | 0.630909173 | + T2D risk | Body    |
| cg17429129    | RAP1GAP2 | chr17 | 0.630922989 | + T2D risk | Body    |
| cg23485436    | KDM4B    | chr19 | 0.630997418 | - T2D risk | Body    |
| cg08374341    | CNTNAP2  | chr7  | 0.631006011 | - T2D risk | Body    |
| cg02019549    | MAN1A1   | chr6  | 0.631025828 | - T2D risk | Body    |
| cg00239505    | DIP2C    | chr10 | 0.631049057 | + T2D risk | Body    |
| cg08999764    | KCNJ12   | chr17 | 0.63106118  | + T2D risk | 5'UTR   |
| cg25115537    | ZHX2     | chr8  | 0.631170075 | - T2D risk | 5'UTR   |
| cg16123438    | TTC28    | chr22 | 0.631237492 | - T2D risk | Body    |
| cg19559644    | NUP98    | chr11 | 0.631266143 | + T2D risk | Body    |
| cg03984209    | ERC2     | chr3  | 0.631410773 | + T2D risk | Body    |
| cg05742691    | RANBP17  | chr5  | 0.631448239 | + T2D risk | TSS1500 |
| cg10463652    | PLEKHG3  | chr14 | 0.631476594 | + T2D risk | Body    |
| cg02105423    | NPAT     | chr11 | 0.631553205 | - T2D risk | Body    |
| cg07638334    | DIP2C    | chr10 | 0.631613697 | + T2D risk | Body    |
| ch.16.192535R | CREBBP   | chr16 | 0.631625745 | - T2D risk | Body    |
| cg06036728    | PRKAG2   | chr7  | 0.631988532 | - T2D risk | Body    |
| cg00452039    | PRKAG2   | chr7  | 0.63199761  | + T2D risk | Body    |
| cg01322438    | TOP2A    | chr17 | 0.632034094 | + T2D risk | Body    |
| cg04373487    | UXS1     | chr2  | 0.632062948 | + T2D risk | Body    |
| cg11257123    | TANC2    | chr17 | 0.632072111 | + T2D risk | Body    |
| cg20833161    | CUX2     | chr12 | 0.632299928 | - T2D risk | Body    |
| cg13627467    | SH3GL2   | chr9  | 0.63247722  | - T2D risk | 3'UTR   |
| cg00590106    | SSBP2    | chr5  | 0.632524579 | - T2D risk | Body    |
| cg06263939    | CHID1    | chr11 | 0.63255874  | + T2D risk | TSS1500 |
| cg26153234    | ATP8A2   | chr13 | 0.632653574 | - T2D risk | TSS1500 |
| cg08026464    | FARSB    | chr2  | 0.632736699 | + T2D risk | TSS1500 |
| cg15080872    | CDH22    | chr20 | 0.632820321 | - T2D risk | Body    |
| cg06476228    | GALK2    | chr15 | 0.632824412 | + T2D risk | TSS200  |
| cg19428249    | PACRG    | chr6  | 0.632827894 | + T2D risk | Body    |
| cg04200224    | SCGN     | chr6  | 0.632912015 | - T2D risk | TSS200  |
| cg05761251    | PDK1     | chr2  | 0.632973697 | + T2D risk | Body    |
| cg13273186    | ATXN1    | chr6  | 0.633083388 | - T2D risk | 5'UTR   |
| cg08461802    | DIP2C    | chr10 | 0.63310609  | - T2D risk | Body    |
| cg06458745    | SGSM2    | chr17 | 0.633113798 | + T2D risk | Body    |
| cg18086083    | JPH2     | chr20 | 0.633297804 | + T2D risk | Body    |
| cg12446939    | ASH1L    | chr1  | 0.633349294 | - T2D risk | Body    |
| cg05393688    | TSC22D1  | chr13 | 0.633482826 | + T2D risk | Body    |
| cg25861577    | ADCY5    | chr3  | 0.633569226 | - T2D risk | Body    |
| cg10595344    | WDR47    | chr1  | 0.633569896 | + T2D risk | TSS200  |
| cg08494843    | SLIT3    | chr5  | 0.633768548 | - T2D risk | Body    |
| cg12001113    | TSHZ1    | chr18 | 0.633768715 | - T2D risk | TSS1500 |
| cg15309223    | TMEM59   | chr1  | 0.633816755 | + T2D risk | 1stExon |
| cg15309223    | TMEM59   | chr1  | 0.633816755 | + T2D risk | 5'UTR   |



|            |          |       |             |            |         |
|------------|----------|-------|-------------|------------|---------|
| cg14182527 | UXS1     | chr2  | 0.633876935 | - T2D risk | Body    |
| cg15741083 | CRYL1    | chr13 | 0.633881088 | - T2D risk | Body    |
| cg04362902 | FBXO11   | chr2  | 0.633955345 | - T2D risk | Body    |
| cg15283737 | CUX2     | chr12 | 0.634044637 | - T2D risk | Body    |
| cg08776875 | ST6GAL1  | chr3  | 0.634045253 | - T2D risk | TSS200  |
| cg04406115 | KDM4B    | chr19 | 0.63411104  | - T2D risk | Body    |
| cg13928438 | FNIP2    | chr4  | 0.63414296  | - T2D risk | Body    |
| cg00395036 | ARL15    | chr5  | 0.634148071 | - T2D risk | Body    |
| cg27228578 | DNAH9    | chr17 | 0.634240564 | + T2D risk | 1stExon |
| cg02998857 | ANK3     | chr10 | 0.63436235  | - T2D risk | ExonBnd |
| cg02998857 | ANK3     | chr10 | 0.63436235  | - T2D risk | Body    |
| cg22633643 | PRKAG2   | chr7  | 0.634415888 | - T2D risk | Body    |
| cg20923549 | PRKAG2   | chr7  | 0.634623202 | + T2D risk | Body    |
| cg11819198 | PRKAG2   | chr7  | 0.634645333 | - T2D risk | Body    |
| cg19803826 | SGSM2    | chr17 | 0.634813079 | + T2D risk | Body    |
| cg13657776 | USP29    | chr19 | 0.634947672 | + T2D risk | TSS1500 |
| cg12899919 | KIAA0355 | chr19 | 0.635073997 | - T2D risk | Body    |
| cg04228581 | ASH1L    | chr1  | 0.635074317 | + T2D risk | Body    |
| cg21567486 | PACS1    | chr11 | 0.635090814 | - T2D risk | Body    |
| cg16020759 | CADM1    | chr11 | 0.635436677 | + T2D risk | 3'UTR   |
| cg09131631 | SEZ6L    | chr22 | 0.63545301  | - T2D risk | TSS1500 |
| cg24252925 | ATRNL1   | chr10 | 0.635638925 | - T2D risk | Body    |
| cg21143896 | GNA12    | chr7  | 0.63566224  | + T2D risk | Body    |
| cg00785037 | ATP4A    | chr19 | 0.635700083 | - T2D risk | Body    |
| cg07366462 | ADCY5    | chr3  | 0.635714934 | - T2D risk | Body    |
| cg26660102 | PKD1     | chr2  | 0.635731881 | + T2D risk | Body    |
| cg10070788 | BIRC5    | chr17 | 0.635745016 | - T2D risk | 3'UTR   |
| cg14624737 | CUX1     | chr7  | 0.635745194 | + T2D risk | Body    |
| cg24200175 | PICALM   | chr11 | 0.635836599 | + T2D risk | 3'UTR   |
| cg15072634 | CNTROB   | chr17 | 0.635916229 | - T2D risk | Body    |
| cg19139509 | CNTNAP2  | chr7  | 0.635982143 | + T2D risk | Body    |
| cg23817232 | ANK3     | chr10 | 0.636242114 | - T2D risk | Body    |
| cg18977539 | FLT1     | chr13 | 0.636353697 | - T2D risk | Body    |
| cg17826531 | SKAP1    | chr17 | 0.636426197 | + T2D risk | Body    |
| cg02531768 | DIP2C    | chr10 | 0.636455497 | - T2D risk | Body    |
| cg10536349 | SPAG9    | chr17 | 0.636484    | - T2D risk | Body    |
| cg19002902 | IFT74    | chr9  | 0.636569387 | - T2D risk | Body    |
| cg14038009 | RGS7     | chr1  | 0.636628754 | - T2D risk | Body    |
| cg02573468 | DLL4     | chr15 | 0.636635128 | + T2D risk | Body    |
| cg13544027 | PRMT3    | chr11 | 0.636846162 | + T2D risk | Body    |
| cg04105895 | KCNJ12   | chr17 | 0.636857175 | - T2D risk | 5'UTR   |
| cg19129981 | PPP1R12A | chr12 | 0.636918758 | + T2D risk | Body    |
| cg23474135 | PRKCE    | chr2  | 0.637009301 | - T2D risk | Body    |
| cg13297988 | ARL8B    | chr3  | 0.637243129 | - T2D risk | TSS200  |
| cg02809083 | ADCY5    | chr3  | 0.637256487 | + T2D risk | Body    |
| cg19390941 | PACRG    | chr6  | 0.637410302 | - T2D risk | Body    |
| cg12283057 | PDE8A    | chr15 | 0.637430337 | - T2D risk | Body    |
| cg15730346 | SKAP1    | chr17 | 0.637456605 | + T2D risk | TSS1500 |
| cg10430352 | PRKCE    | chr2  | 0.637523671 | - T2D risk | Body    |
| cg17951368 | NUCB2    | chr11 | 0.637543173 | - T2D risk | TSS200  |
| cg24824703 | GNA12    | chr7  | 0.63764914  | + T2D risk | Body    |
| cg22735402 | CNTNAP2  | chr7  | 0.637675628 | - T2D risk | Body    |
| cg25581843 | PDE7A    | chr8  | 0.637684785 | + T2D risk | Body    |
| cg14486905 | GAD1     | chr2  | 0.63785099  | + T2D risk | Body    |
| cg05838857 | PACS2    | chr14 | 0.638022443 | + T2D risk | Body    |
| cg18525081 | UBL3     | chr13 | 0.638065366 | + T2D risk | TSS1500 |
| cg21366622 | ATXN1    | chr6  | 0.638074146 | + T2D risk | 5'UTR   |
| cg22090192 | PHF21A   | chr11 | 0.638096643 | + T2D risk | Body    |
| cg21942557 | INPP4A   | chr2  | 0.638159172 | - T2D risk | 5'UTR   |
| cg08364730 | CREBBP   | chr16 | 0.638191619 | + T2D risk | Body    |
| cg22169659 | PRMT3    | chr11 | 0.638371858 | - T2D risk | Body    |
| cg22625220 | NCOR1    | chr17 | 0.638387663 | - T2D risk | TSS1500 |
| cg17333886 | DIP2C    | chr10 | 0.638389444 | + T2D risk | Body    |
| cg27152898 | ITGA1    | chr5  | 0.638471054 | - T2D risk | Body    |
| cg05045210 | TJP1     | chr15 | 0.638506942 | - T2D risk | TSS200  |
| cg05045210 | TJP1     | chr15 | 0.638506942 | - T2D risk | TSS1500 |
| cg05045210 | TJP1     | chr15 | 0.638506942 | - T2D risk | Body    |
| cg01267648 | GALK2    | chr15 | 0.638539782 | - T2D risk | 5'UTR   |
| cg01267648 | GALK2    | chr15 | 0.638539782 | - T2D risk | Body    |
| cg27634695 | ANK2     | chr4  | 0.638545676 | - T2D risk | TSS200  |



|            |          |       |             |            |         |
|------------|----------|-------|-------------|------------|---------|
| cg20048260 | COL4A1   | chr13 | 0.638555465 | + T2D risk | Body    |
| cg04661346 | PPFIBP1  | chr12 | 0.638606322 | + T2D risk | TSS1500 |
| cg11243269 | TJP1     | chr15 | 0.638638325 | - T2D risk | Body    |
| cg03028536 | CUX2     | chr12 | 0.638709691 | + T2D risk | Body    |
| cg25855315 | DNAH9    | chr17 | 0.638902039 | - T2D risk | Body    |
| cg26566673 | ITGA1    | chr5  | 0.639060847 | - T2D risk | Body    |
| cg25644149 | SPOCK1   | chr5  | 0.639150892 | + T2D risk | Body    |
| cg16080103 | EFCAB14  | chr1  | 0.639251224 | + T2D risk | Body    |
| cg15955165 | UBL3     | chr13 | 0.639254349 | - T2D risk | Body    |
| cg22627610 | SPOCK1   | chr5  | 0.639261466 | + T2D risk | Body    |
| cg24298280 | RNF217   | chr6  | 0.63947417  | - T2D risk | 5'UTR   |
| cg04348223 | DIP2C    | chr10 | 0.639649952 | + T2D risk | Body    |
| cg26624525 | PHF21A   | chr11 | 0.639676382 | - T2D risk | Body    |
| cg26624525 | PHF21A   | chr11 | 0.639676382 | - T2D risk | ExonBnd |
| cg24424525 | KIAA1217 | chr10 | 0.63989359  | + T2D risk | Body    |
| cg23459483 | PCYT1A   | chr3  | 0.640048484 | - T2D risk | 5'UTR   |
| cg03658982 | GRK5     | chr10 | 0.640161418 | + T2D risk | Body    |
| cg23571282 | RCAN2    | chr6  | 0.640181937 | - T2D risk | TSS1500 |
| cg17420983 | CUX2     | chr12 | 0.640189308 | + T2D risk | TSS1500 |
| cg11362604 | MEIS2    | chr15 | 0.640201638 | + T2D risk | Body    |
| cg15473502 | ST6GAL1  | chr3  | 0.640276675 | - T2D risk | 5'UTR   |
| cg11896546 | DDC      | chr7  | 0.64042146  | - T2D risk | 5'UTR   |
| cg11896546 | DDC      | chr7  | 0.64042146  | - T2D risk | TSS200  |
| cg27614488 | CLIC5    | chr6  | 0.640424794 | - T2D risk | Body    |
| cg16505390 | TMEM150C | chr4  | 0.640626333 | - T2D risk | 5'UTR   |
| cg10322879 | YWHAQ    | chr2  | 0.640776726 | - T2D risk | Body    |
| cg12793116 | ADCY5    | chr3  | 0.640782326 | + T2D risk | Body    |
| cg23497501 | KCNIP3   | chr2  | 0.640818085 | + T2D risk | TSS200  |
| cg23497501 | KCNIP3   | chr2  | 0.640818085 | + T2D risk | Body    |
| cg14370061 | GNA12    | chr7  | 0.640909869 | - T2D risk | Body    |
| cg11641538 | KANTR    | chrX  | 0.641186631 | - T2D risk | Body    |
| cg18679596 | ZRANB1   | chr10 | 0.641255376 | - T2D risk | Body    |
| cg12939634 | SPPL2A   | chr15 | 0.641343838 | - T2D risk | Body    |
| cg02717454 | CREBBP   | chr16 | 0.641377105 | - T2D risk | Body    |
| cg04703221 | WWP2     | chr16 | 0.641505159 | - T2D risk | Body    |
| cg04054840 | BCAT1    | chr12 | 0.641546603 | + T2D risk | Body    |
| cg09715009 | CPLX2    | chr5  | 0.641691396 | - T2D risk | 5'UTR   |
| cg00650953 | CNTNAP2  | chr7  | 0.641807848 | - T2D risk | Body    |
| cg11505338 | KDR      | chr4  | 0.642063242 | - T2D risk | TSS200  |
| cg12590753 | RGS7     | chr1  | 0.642288467 | - T2D risk | Body    |
| cg26079877 | YWHAQ    | chr2  | 0.642333376 | + T2D risk | Body    |
| cg24894680 | KREMEN1  | chr22 | 0.642363314 | + T2D risk | Body    |
| cg01659632 | PLAGL1   | chr6  | 0.642578345 | - T2D risk | 3'UTR   |
| cg15755137 | ST6GAL1  | chr3  | 0.642617224 | - T2D risk | TSS1500 |
| cg01056853 | PHACTR1  | chr6  | 0.642624251 | + T2D risk | Body    |
| cg09273772 | TOP2A    | chr17 | 0.642671794 | - T2D risk | TSS1500 |
| cg07688779 | MEIS2    | chr15 | 0.642719686 | + T2D risk | 5'UTR   |
| cg07688779 | MEIS2    | chr15 | 0.642719686 | + T2D risk | 1stExon |
| cg07688779 | MEIS2    | chr15 | 0.642719686 | + T2D risk | Body    |
| cg07688779 | MEIS2    | chr15 | 0.642719686 | + T2D risk | TSS1500 |
| cg17516556 | TBC1D5   | chr3  | 0.642737224 | + T2D risk | TSS1500 |
| cg00029284 | CUX2     | chr12 | 0.642743837 | + T2D risk | Body    |
| cg17386093 | SLIT3    | chr5  | 0.642874086 | - T2D risk | 1stExon |
| cg04995537 | SCAF8    | chr6  | 0.642928461 | + T2D risk | Body    |
| cg18998172 | SPOCK1   | chr5  | 0.643022352 | + T2D risk | Body    |
| cg03807888 | LMCD1    | chr3  | 0.643070897 | - T2D risk | Body    |
| cg18297421 | SVIP     | chr11 | 0.643114254 | + T2D risk | 1stExon |
| cg00987808 | PDE3A    | chr12 | 0.643340236 | + T2D risk | Body    |
| cg26379627 | GLG1     | chr16 | 0.643450769 | - T2D risk | TSS1500 |
| cg01284438 | CPLX2    | chr5  | 0.643451331 | + T2D risk | 5'UTR   |
| cg05639392 | COL4A1   | chr13 | 0.643483187 | + T2D risk | Body    |
| cg00529909 | KDM4B    | chr19 | 0.643572926 | - T2D risk | Body    |
| cg03243666 | SRPK2    | chr7  | 0.643621459 | - T2D risk | Body    |
| cg12566083 | TSC22D1  | chr13 | 0.643732275 | + T2D risk | Body    |
| cg12566083 | TSC22D1  | chr13 | 0.643732275 | + T2D risk | TSS1500 |
| cg12566083 | TSC22D1  | chr13 | 0.643732275 | + T2D risk | 5'UTR   |
| cg12566083 | TSC22D1  | chr13 | 0.643732275 | + T2D risk | TSS200  |
| cg25644208 | ARHGAP32 | chr11 | 0.64374744  | + T2D risk | Body    |
| cg00534386 | ULK4     | chr3  | 0.643840996 | - T2D risk | Body    |
| cg02104626 | KIAA0232 | chr4  | 0.643842613 | - T2D risk | Body    |



|            |          |       |             |            |         |
|------------|----------|-------|-------------|------------|---------|
| cg17012893 | ATP8A2   | chr13 | 0.644106342 | - T2D risk | Body    |
| cg19653624 | PRMT3    | chr11 | 0.644121076 | + T2D risk | TSS200  |
| cg03892601 | CNTNAP2  | chr7  | 0.644133179 | + T2D risk | Body    |
| cg11141044 | ARID2    | chr12 | 0.644360155 | - T2D risk | Body    |
| cg23285459 | GNA12    | chr7  | 0.644488607 | - T2D risk | Body    |
| cg22056480 | PDE3A    | chr12 | 0.644511427 | - T2D risk | Body    |
| cg18216571 | SLC7A2   | chr8  | 0.644644576 | + T2D risk | 5'UTR   |
| cg18216571 | SLC7A2   | chr8  | 0.644644576 | + T2D risk | TSS1500 |
| cg00164538 | CUX2     | chr12 | 0.644673632 | + T2D risk | Body    |
| cg14492551 | TENM2    | chr5  | 0.644696275 | + T2D risk | Body    |
| cg15787389 | ERC2     | chr3  | 0.644732072 | - T2D risk | Body    |
| cg09126120 | PACS1    | chr11 | 0.644784149 | - T2D risk | Body    |
| cg16821211 | TJP1     | chr15 | 0.644820369 | - T2D risk | Body    |
| cg23574403 | DDHD2    | chr8  | 0.644852414 | - T2D risk | 5'UTR   |
| cg23574403 | DDHD2    | chr8  | 0.644852414 | - T2D risk | TSS200  |
| cg14269558 | CLIC5    | chr6  | 0.644913633 | + T2D risk | TSS200  |
| cg14269558 | CLIC5    | chr6  | 0.644913633 | + T2D risk | Body    |
| cg06670711 | JPH2     | chr20 | 0.644955096 | - T2D risk | 3'UTR   |
| cg00424064 | TANC2    | chr17 | 0.644981764 | + T2D risk | Body    |
| cg03946683 | KREMEN1  | chr22 | 0.645014573 | - T2D risk | Body    |
| cg26924247 | RGS7     | chr1  | 0.645153544 | - T2D risk | Body    |
| cg27445522 | ENAH     | chr1  | 0.645186892 | - T2D risk | TSS1500 |
| cg05113850 | CALD1    | chr7  | 0.645410811 | + T2D risk | Body    |
| cg08482700 | COX6A1   | chr12 | 0.645442964 | + T2D risk | TSS1500 |
| cg17654017 | PLAGL1   | chr6  | 0.645582797 | + T2D risk | 5'UTR   |
| cg23933355 | ATP8A2   | chr13 | 0.645612132 | - T2D risk | Body    |
| cg14869517 | GALK2    | chr15 | 0.64579745  | + T2D risk | Body    |
| cg19131667 | TBC1D5   | chr3  | 0.64587431  | - T2D risk | Body    |
| cg15562418 | RAP1GAP2 | chr17 | 0.645917277 | + T2D risk | Body    |
| cg18666004 | ULK4     | chr3  | 0.645937795 | + T2D risk | TSS200  |
| cg21534309 | RSF1     | chr11 | 0.645972    | + T2D risk | Body    |
| cg03826480 | KCNJ12   | chr17 | 0.646073732 | + T2D risk | 3'UTR   |
| cg18188891 | CUX1     | chr7  | 0.646097379 | + T2D risk | Body    |
| cg02352612 | MGRN1    | chr16 | 0.646236933 | + T2D risk | Body    |
| cg02352612 | MGRN1    | chr16 | 0.646236933 | + T2D risk | 3'UTR   |
| cg23657393 | JPH2     | chr20 | 0.646240982 | - T2D risk | Body    |
| cg04234813 | CUX2     | chr12 | 0.646289579 | + T2D risk | Body    |
| cg26251101 | RHOQ     | chr2  | 0.646414279 | - T2D risk | TSS1500 |
| cg07077705 | CREBBP   | chr16 | 0.646525975 | - T2D risk | Body    |
| cg02776664 | MAST1    | chr19 | 0.64656765  | + T2D risk | Body    |
| cg14844401 | ADCY5    | chr3  | 0.64656887  | - T2D risk | Body    |
| cg12371924 | BCAT1    | chr12 | 0.646694705 | + T2D risk | TSS200  |
| cg10391294 | CDK8     | chr13 | 0.646855614 | - T2D risk | Body    |
| cg18982976 | TANC2    | chr17 | 0.646857925 | + T2D risk | Body    |
| cg01022670 | DIP2C    | chr10 | 0.647118481 | + T2D risk | Body    |
| cg21449177 | PRKD1    | chr14 | 0.647180251 | + T2D risk | Body    |
| cg27052402 | DDHD2    | chr8  | 0.647358696 | + T2D risk | TSS1500 |
| cg27052402 | DDHD2    | chr8  | 0.647358696 | + T2D risk | TSS200  |
| cg03018058 | RHBDD1   | chr2  | 0.647465031 | - T2D risk | TSS1500 |
| cg01823533 | CLEC16A  | chr16 | 0.647472578 | + T2D risk | Body    |
| cg06046574 | SNX4     | chr3  | 0.647671761 | - T2D risk | TSS1500 |
| cg08580081 | DNAJC1   | chr10 | 0.647700895 | - T2D risk | Body    |
| cg16967541 | EFR3A    | chr8  | 0.647887582 | + T2D risk | TSS200  |
| cg00579717 | RANBP17  | chr5  | 0.647903923 | - T2D risk | Body    |
| cg23381232 | DYNC1I1  | chr7  | 0.647959306 | + T2D risk | Body    |
| cg27084929 | ST6GAL1  | chr3  | 0.647984267 | + T2D risk | 5'UTR   |
| cg06010111 | TSGA10   | chr2  | 0.648117125 | + T2D risk | TSS200  |
| cg04114351 | CUX2     | chr12 | 0.648128303 | + T2D risk | Body    |
| cg04336905 | DIP2C    | chr10 | 0.648136206 | + T2D risk | Body    |
| cg05133339 | ST6GAL1  | chr3  | 0.648193551 | - T2D risk | 5'UTR   |
| cg27364578 | PHACTR1  | chr6  | 0.648581116 | + T2D risk | Body    |
| cg04316898 | CUX2     | chr12 | 0.648596934 | + T2D risk | Body    |
| cg22374742 | UXS1     | chr2  | 0.648747507 | + T2D risk | Body    |
| cg25521406 | PDE3A    | chr12 | 0.648779327 | + T2D risk | Body    |
| cg14159683 | CLEC16A  | chr16 | 0.648779478 | + T2D risk | Body    |
| cg16807061 | RAP1GAP2 | chr17 | 0.648892382 | - T2D risk | Body    |
| cg13896328 | PTPRU    | chr1  | 0.648905322 | - T2D risk | 3'UTR   |
| cg16909635 | SLIT3    | chr5  | 0.648954801 | + T2D risk | Body    |
| cg11435247 | APBA1    | chr9  | 0.649093122 | - T2D risk | ExonBnd |
| cg11435247 | APBA1    | chr9  | 0.649093122 | - T2D risk | Body    |



|            |          |       |             |            |         |
|------------|----------|-------|-------------|------------|---------|
| cg13751455 | SPAG9    | chr17 | 0.649192273 | + T2D risk | Body    |
| cg15701795 | TENM2    | chr5  | 0.649232722 | + T2D risk | Body    |
| cg19424533 | ANK3     | chr10 | 0.649238001 | - T2D risk | Body    |
| cg03740323 | PRKAG2   | chr7  | 0.649275618 | + T2D risk | Body    |
| cg01578939 | ARL15    | chr5  | 0.649318394 | + T2D risk | Body    |
| cg19875864 | ARHGAP32 | chr11 | 0.649397829 | - T2D risk | Body    |
| cg06916950 | SLC7A2   | chr8  | 0.649398986 | - T2D risk | 5'UTR   |
| cg22243466 | ANK2     | chr4  | 0.649429314 | - T2D risk | Body    |
| cg14532217 | TBC1D5   | chr3  | 0.649714919 | + T2D risk | Body    |
| cg26020585 | GGPS1    | chr1  | 0.649763753 | - T2D risk | TSS200  |
| cg26020585 | GGPS1    | chr1  | 0.649763753 | - T2D risk | 5'UTR   |
| cg26020585 | GGPS1    | chr1  | 0.649763753 | - T2D risk | 1stExon |
| cg10539002 | ATRNL1   | chr10 | 0.649775807 | - T2D risk | Body    |
| cg01938009 | CPLX2    | chr5  | 0.649816566 | + T2D risk | 5'UTR   |
| cg05289466 | KDM4B    | chr19 | 0.649834021 | + T2D risk | Body    |
| cg10097882 | FAM160A1 | chr4  | 0.649899483 | - T2D risk | 5'UTR   |
| cg07100595 | ERC2     | chr3  | 0.650105213 | - T2D risk | TSS1500 |
| cg06140903 | ATP8A2   | chr13 | 0.650111349 | - T2D risk | Body    |
| cg02101434 | CLEC16A  | chr16 | 0.650127834 | - T2D risk | Body    |
| cg17463564 | DIP2C    | chr10 | 0.650131467 | + T2D risk | Body    |
| cg15749852 | TBC1D5   | chr3  | 0.650312566 | - T2D risk | Body    |
| cg07952552 | INPP4A   | chr2  | 0.650503602 | - T2D risk | 5'UTR   |
| cg06884029 | KDM4B    | chr19 | 0.65064519  | + T2D risk | 5'UTR   |
| cg25635505 | CUX1     | chr7  | 0.650706475 | + T2D risk | Body    |
| cg16583923 | MAST1    | chr19 | 0.650724848 | - T2D risk | 3'UTR   |
| cg12803878 | SLC7A2   | chr8  | 0.650750493 | + T2D risk | TSS1500 |
| cg16398904 | ITPKB    | chr1  | 0.650786477 | + T2D risk | Body    |
| cg16483326 | CALD1    | chr7  | 0.65087014  | + T2D risk | 5'UTR   |
| cg19992453 | GRK5     | chr10 | 0.650888502 | - T2D risk | Body    |
| cg03265533 | KDR      | chr4  | 0.65091385  | + T2D risk | Body    |
| cg21550585 | RNF157   | chr17 | 0.650918936 | + T2D risk | Body    |
| cg08257185 | CUX1     | chr7  | 0.650949322 | + T2D risk | 5'UTR   |
| cg08257185 | CUX1     | chr7  | 0.650949322 | + T2D risk | TSS200  |
| cg08257185 | CUX1     | chr7  | 0.650949322 | + T2D risk | 1stExon |
| cg17689498 | TJP1     | chr15 | 0.651112487 | - T2D risk | Body    |
| cg09310112 | KDM4B    | chr19 | 0.651151189 | + T2D risk | 5'UTR   |
| cg13303954 | FAM160A1 | chr4  | 0.651240699 | - T2D risk | Body    |
| cg17350528 | SEZ6L    | chr22 | 0.651282875 | - T2D risk | Body    |
| cg17979958 | RCAN2    | chr6  | 0.651357482 | + T2D risk | 5'UTR   |
| cg17979958 | RCAN2    | chr6  | 0.651357482 | + T2D risk | 1stExon |
| cg17979958 | RCAN2    | chr6  | 0.651357482 | + T2D risk | Body    |
| cg00590830 | PTP4A2   | chr1  | 0.651361474 | + T2D risk | 5'UTR   |
| cg00590830 | PTP4A2   | chr1  | 0.651361474 | + T2D risk | 1stExon |
| cg16163065 | ITGA1    | chr5  | 0.651670541 | + T2D risk | Body    |
| cg10279395 | ATXN1    | chr6  | 0.651683435 | - T2D risk | 5'UTR   |
| cg03252313 | CNTNAP2  | chr7  | 0.651744552 | - T2D risk | 3'UTR   |
| cg23575245 | MYO6     | chr6  | 0.651788232 | + T2D risk | 5'UTR   |
| cg02037858 | RTN4     | chr2  | 0.651815782 | - T2D risk | Body    |
| cg13297671 | ARID2    | chr12 | 0.651856064 | + T2D risk | Body    |
| cg15009088 | RSF1     | chr11 | 0.651884163 | - T2D risk | Body    |
| cg13849825 | CCNB1    | chr5  | 0.652108817 | - T2D risk | TSS1500 |
| cg00320301 | SLIT3    | chr5  | 0.652358831 | + T2D risk | Body    |
| cg23521444 | PLAGL1   | chr6  | 0.652419336 | - T2D risk | TSS200  |
| cg08463614 | TENM2    | chr5  | 0.652538453 | + T2D risk | Body    |
| cg03373709 | PRKCB    | chr16 | 0.652640557 | - T2D risk | Body    |
| cg09357953 | ADCY5    | chr3  | 0.652835827 | - T2D risk | Body    |
| cg04130043 | KANTR    | chrX  | 0.65284984  | - T2D risk | Body    |
| cg09827368 | MYO6     | chr6  | 0.652872044 | - T2D risk | 5'UTR   |
| cg17607024 | ZRANB1   | chr10 | 0.652872614 | - T2D risk | 5'UTR   |
| cg17607024 | ZRANB1   | chr10 | 0.652872614 | - T2D risk | 1stExon |
| cg26521024 | TSC22D1  | chr13 | 0.652888581 | - T2D risk | TSS1500 |
| cg19683608 | DIP2C    | chr10 | 0.652888642 | - T2D risk | Body    |
| cg26003119 | WIZ      | chr19 | 0.653136909 | + T2D risk | Body    |
| cg04486846 | TTC28    | chr22 | 0.653226531 | + T2D risk | Body    |
| cg14671833 | RHOQ     | chr2  | 0.653242908 | - T2D risk | Body    |
| cg19283298 | RAP2A    | chr13 | 0.653324964 | - T2D risk | Body    |
| cg10148800 | KCNJ12   | chr17 | 0.653326076 | + T2D risk | 5'UTR   |
| cg03400464 | MAST1    | chr19 | 0.65338069  | + T2D risk | Body    |
| cg17086141 | NPEPPS   | chr17 | 0.653427405 | + T2D risk | TSS1500 |
| cg19168259 | PRMT3    | chr11 | 0.653458233 | - T2D risk | Body    |



|            |          |       |             |            |         |
|------------|----------|-------|-------------|------------|---------|
| cg12837996 | AMD1     | chr6  | 0.653673109 | - T2D risk | ExonBnd |
| cg12837996 | AMD1     | chr6  | 0.653673109 | - T2D risk | Body    |
| cg13706434 | SH3GL2   | chr9  | 0.653730951 | + T2D risk | Body    |
| cg17750109 | NGF      | chr1  | 0.653760789 | - T2D risk | 5'UTR   |
| cg18876494 | RAP1B    | chr12 | 0.65377739  | - T2D risk | TSS1500 |
| cg08284826 | CREBBP   | chr16 | 0.654150651 | - T2D risk | Body    |
| cg20883644 | SPPL2A   | chr15 | 0.654311947 | + T2D risk | Body    |
| cg06006665 | DIP2C    | chr10 | 0.654905508 | + T2D risk | Body    |
| cg06166515 | DNAJC1   | chr10 | 0.65492256  | + T2D risk | Body    |
| cg22989379 | ACSS2    | chr20 | 0.654975856 | + T2D risk | TSS200  |
| cg24332570 | ANK3     | chr10 | 0.655003321 | - T2D risk | Body    |
| cg01956158 | EFR3A    | chr8  | 0.655007826 | + T2D risk | Body    |
| cg12344235 | ST6GAL1  | chr3  | 0.655037417 | + T2D risk | Body    |
| cg12344235 | ST6GAL1  | chr3  | 0.655037417 | + T2D risk | 5'UTR   |
| cg02596683 | ARL15    | chr5  | 0.655158271 | + T2D risk | Body    |
| cg10432598 | TSGA10   | chr2  | 0.655188167 | - T2D risk | Body    |
| cg16904052 | ARHGAP32 | chr11 | 0.655415767 | + T2D risk | Body    |
| cg20678374 | ASXL2    | chr2  | 0.655544503 | - T2D risk | Body    |
| cg07145834 | ZHX2     | chr8  | 0.655604362 | + T2D risk | 5'UTR   |
| cg11468148 | DIP2C    | chr10 | 0.655617561 | - T2D risk | Body    |
| cg14307471 | NOL4     | chr18 | 0.655671396 | - T2D risk | 3'UTR   |
| cg09632011 | ACSS2    | chr20 | 0.6557122   | + T2D risk | Body    |
| cg09632011 | ACSS2    | chr20 | 0.6557122   | + T2D risk | ExonBnd |
| cg02046881 | GNA12    | chr7  | 0.655761638 | - T2D risk | Body    |
| cg05786548 | FAM160A1 | chr4  | 0.655915271 | + T2D risk | TSS200  |
| cg14706575 | RTN4     | chr2  | 0.656022609 | - T2D risk | TSS1500 |
| cg14706575 | RTN4     | chr2  | 0.656022609 | - T2D risk | 1stExon |
| cg14706575 | RTN4     | chr2  | 0.656022609 | - T2D risk | 5'UTR   |
| cg01061290 | TSGA10   | chr2  | 0.656080896 | - T2D risk | TSS200  |
| cg00151815 | SRPK2    | chr7  | 0.656092076 | - T2D risk | Body    |
| cg02052569 | ATXN1    | chr6  | 0.656184449 | - T2D risk | 5'UTR   |
| cg00082656 | SRPK2    | chr7  | 0.656236682 | - T2D risk | Body    |
| cg02519218 | CHFR     | chr12 | 0.656245969 | + T2D risk | Body    |
| cg27287166 | NCOA2    | chr8  | 0.656268188 | - T2D risk | 5'UTR   |
| cg17950139 | CPLX2    | chr5  | 0.656352007 | - T2D risk | TSS1500 |
| cg17950139 | CPLX2    | chr5  | 0.656352007 | - T2D risk | 5'UTR   |
| cg25085723 | PPFIBP1  | chr12 | 0.656481117 | - T2D risk | 5'UTR   |
| cg11710299 | ARL15    | chr5  | 0.656485716 | - T2D risk | Body    |
| cg19210352 | CREBBP   | chr16 | 0.656657442 | + T2D risk | Body    |
| cg05062944 | RHBDD1   | chr2  | 0.656733368 | + T2D risk | Body    |
| cg13598864 | POC1B    | chr12 | 0.657060465 | + T2D risk | Body    |
| cg26677394 | RCAN2    | chr6  | 0.657266852 | - T2D risk | Body    |
| cg13367589 | CHKA     | chr11 | 0.6573854   | + T2D risk | Body    |
| cg06076692 | ATXN1    | chr6  | 0.657395177 | - T2D risk | 5'UTR   |
| cg15621892 | ANK2     | chr4  | 0.657469375 | - T2D risk | Body    |
| cg11681272 | SRPK2    | chr7  | 0.657576056 | - T2D risk | Body    |
| cg11681272 | SRPK2    | chr7  | 0.657576056 | - T2D risk | ExonBnd |
| cg09509553 | RGS7     | chr1  | 0.657587749 | - T2D risk | Body    |
| cg14773588 | PHACTR1  | chr6  | 0.657723029 | + T2D risk | Body    |
| cg16688681 | GNA12    | chr7  | 0.657843225 | - T2D risk | Body    |
| cg15188939 | ARIH1    | chr15 | 0.65792832  | - T2D risk | Body    |
| cg26733444 | PRKAG2   | chr7  | 0.658054596 | + T2D risk | Body    |
| cg19567866 | SPOCK1   | chr5  | 0.658068997 | - T2D risk | Body    |
| cg19308029 | SSBP2    | chr5  | 0.658183292 | + T2D risk | Body    |
| cg24624090 | SLIT3    | chr5  | 0.658193958 | - T2D risk | Body    |
| cg19621049 | ATXN1    | chr6  | 0.658223169 | - T2D risk | 5'UTR   |
| cg25106461 | PACS2    | chr14 | 0.658245739 | - T2D risk | TSS1500 |
| cg12009109 | GGPS1    | chr1  | 0.658331141 | - T2D risk | TSS200  |
| cg12009109 | GGPS1    | chr1  | 0.658331141 | - T2D risk | TSS1500 |
| cg19298572 | GALK2    | chr15 | 0.658364674 | + T2D risk | TSS200  |
| cg23629959 | PRKACB   | chr1  | 0.658436999 | + T2D risk | Body    |
| cg04940349 | RAP1GAP2 | chr17 | 0.658438514 | + T2D risk | 3'UTR   |
| cg18484162 | CLASP2   | chr3  | 0.658704095 | + T2D risk | TSS1500 |
| cg22505420 | TPCN1    | chr12 | 0.658781018 | - T2D risk | Body    |
| cg15726318 | NCOA2    | chr8  | 0.658874836 | - T2D risk | 5'UTR   |
| cg04960169 | RAP1GAP2 | chr17 | 0.658916804 | - T2D risk | Body    |
| cg26387689 | PDE3A    | chr12 | 0.659077266 | - T2D risk | TSS1500 |
| cg06910198 | ANK3     | chr10 | 0.659115523 | - T2D risk | 1stExon |
| cg06910198 | ANK3     | chr10 | 0.659115523 | - T2D risk | 5'UTR   |
| cg06910198 | ANK3     | chr10 | 0.659115523 | - T2D risk | Body    |



|            |          |       |             |            |         |
|------------|----------|-------|-------------|------------|---------|
| cg18697121 | CUL1     | chr7  | 0.659129321 | + T2D risk | 5'UTR   |
| cg16231954 | ROBO2    | chr3  | 0.659198923 | - T2D risk | 5'UTR   |
| cg16231954 | ROBO2    | chr3  | 0.659198923 | - T2D risk | 1stExon |
| cg10987413 | ARHGEF9  | chrX  | 0.659384459 | + T2D risk | Body    |
| cg10987413 | ARHGEF9  | chrX  | 0.659384459 | + T2D risk | TSS1500 |
| cg00460589 | PHACTR1  | chr6  | 0.659457195 | + T2D risk | Body    |
| cg15191126 | TSGA10   | chr2  | 0.659525167 | + T2D risk | Body    |
| cg13696545 | ERC2     | chr3  | 0.659588817 | - T2D risk | Body    |
| cg06916161 | ERC2     | chr3  | 0.659687765 | - T2D risk | Body    |
| cg14079020 | TMEM131  | chr2  | 0.659710892 | + T2D risk | Body    |
| cg06089322 | PLEKHG3  | chr14 | 0.659851197 | - T2D risk | Body    |
| cg15747671 | PACRG    | chr6  | 0.659885968 | + T2D risk | Body    |
| cg12307370 | BIRC5    | chr17 | 0.659895476 | + T2D risk | TSS1500 |
| cg20641545 | ATP2B1   | chr12 | 0.660222496 | - T2D risk | 3'UTR   |
| cg15931233 | ARL15    | chr5  | 0.660287024 | - T2D risk | Body    |
| cg25139641 | TSHZ1    | chr18 | 0.660310536 | + T2D risk | TSS1500 |
| cg20835656 | ANK3     | chr10 | 0.660408872 | - T2D risk | Body    |
| cg13596497 | COL4A1   | chr13 | 0.660422726 | + T2D risk | Body    |
| cg09456134 | NCOR1    | chr17 | 0.660508283 | - T2D risk | Body    |
| cg09665488 | SSB      | chr2  | 0.660517277 | + T2D risk | 5'UTR   |
| cg09729030 | ANK2     | chr4  | 0.660647326 | - T2D risk | Body    |
| cg09522479 | DIP2C    | chr10 | 0.660804159 | - T2D risk | Body    |
| cg26134737 | DIP2C    | chr10 | 0.660925927 | + T2D risk | Body    |
| cg09230870 | TANC2    | chr17 | 0.660945057 | - T2D risk | Body    |
| cg10617091 | ARID2    | chr12 | 0.66097566  | - T2D risk | Body    |
| cg23509227 | ZHX2     | chr8  | 0.660988785 | - T2D risk | 5'UTR   |
| cg07996555 | DIP2C    | chr10 | 0.66111947  | + T2D risk | Body    |
| cg02261543 | CTR9     | chr11 | 0.661165044 | - T2D risk | Body    |
| cg18565138 | CHKA     | chr11 | 0.661213792 | + T2D risk | Body    |
| cg22792350 | RANBP17  | chr5  | 0.661360137 | - T2D risk | TSS1500 |
| cg04983163 | ATXN1    | chr6  | 0.661489441 | + T2D risk | 5'UTR   |
| cg04983163 | ATXN1    | chr6  | 0.661489441 | + T2D risk | ExonBnd |
| cg11764784 | ULK4     | chr3  | 0.661662285 | + T2D risk | Body    |
| cg11658909 | ASH1L    | chr1  | 0.662067266 | - T2D risk | 5'UTR   |
| cg10243322 | KDM4B    | chr19 | 0.662073704 | + T2D risk | Body    |
| cg10210928 | GNA12    | chr7  | 0.662171176 | - T2D risk | Body    |
| cg27181968 | NGF      | chr1  | 0.66230091  | + T2D risk | 5'UTR   |
| cg14003467 | PCYT1A   | chr3  | 0.66245711  | - T2D risk | TSS1500 |
| cg18940157 | PACS2    | chr14 | 0.66252699  | + T2D risk | Body    |
| cg18940157 | PACS2    | chr14 | 0.66252699  | + T2D risk | 5'UTR   |
| cg17180443 | ATP4A    | chr19 | 0.662552753 | - T2D risk | Body    |
| cg15042047 | PRKAG2   | chr7  | 0.662594631 | + T2D risk | Body    |
| cg14079445 | CUX2     | chr12 | 0.662644793 | - T2D risk | Body    |
| cg08009697 | SRPK2    | chr7  | 0.662732726 | - T2D risk | Body    |
| cg14355321 | ZHX2     | chr8  | 0.66302821  | + T2D risk | 5'UTR   |
| cg15344068 | CLIC5    | chr6  | 0.663095467 | - T2D risk | 3'UTR   |
| cg15220914 | GRK5     | chr10 | 0.663152379 | + T2D risk | Body    |
| cg02404256 | DYNC111  | chr7  | 0.663160971 | - T2D risk | Body    |
| cg16234086 | CLIC5    | chr6  | 0.663180287 | + T2D risk | TSS200  |
| cg16234086 | CLIC5    | chr6  | 0.663180287 | + T2D risk | Body    |
| cg14846596 | CUL1     | chr7  | 0.663201143 | - T2D risk | 3'UTR   |
| cg08871031 | DIP2C    | chr10 | 0.663241917 | + T2D risk | Body    |
| cg06007323 | KIAA0232 | chr4  | 0.663281831 | - T2D risk | 5'UTR   |
| cg26612987 | LMCD1    | chr3  | 0.663344958 | - T2D risk | TSS1500 |
| cg14713153 | DIP2C    | chr10 | 0.663509592 | - T2D risk | Body    |
| cg02683371 | CLOCK    | chr4  | 0.663521887 | + T2D risk | 3'UTR   |
| cg24113686 | ITPKB    | chr1  | 0.663536094 | + T2D risk | Body    |
| cg03021573 | SEC31A   | chr4  | 0.663811737 | - T2D risk | Body    |
| cg02618151 | PACS2    | chr14 | 0.663852127 | + T2D risk | Body    |
| cg27320207 | NOTCH3   | chr19 | 0.663981594 | - T2D risk | Body    |
| cg04053961 | ATP6V1H  | chr8  | 0.664019847 | + T2D risk | TSS1500 |
| cg20150647 | PFKFB2   | chr1  | 0.664024152 | - T2D risk | Body    |
| cg19877157 | GNA12    | chr7  | 0.664341803 | + T2D risk | Body    |
| cg16309622 | PACRG    | chr6  | 0.664501915 | + T2D risk | Body    |
| cg03287763 | DIP2C    | chr10 | 0.664561124 | - T2D risk | Body    |
| cg16953943 | ATP8A2   | chr13 | 0.664626798 | + T2D risk | Body    |
| cg02332174 | ULK4     | chr3  | 0.664738836 | + T2D risk | Body    |
| cg07862302 | NCOA7    | chr6  | 0.664772924 | - T2D risk | 3'UTR   |
| cg07236840 | DIP2C    | chr10 | 0.664942981 | + T2D risk | Body    |
| cg23581361 | TTC28    | chr22 | 0.664979362 | + T2D risk | Body    |



|            |          |       |             |            |         |
|------------|----------|-------|-------------|------------|---------|
| cg00463844 | PDE8A    | chr15 | 0.665005191 | + T2D risk | 5'UTR   |
| cg00463844 | PDE8A    | chr15 | 0.665005191 | + T2D risk | Body    |
| cg23687319 | GGPS1    | chr1  | 0.665092553 | + T2D risk | 5'UTR   |
| cg23687319 | GGPS1    | chr1  | 0.665092553 | + T2D risk | 1stExon |
| cg27311272 | DIP2C    | chr10 | 0.665167497 | - T2D risk | Body    |
| cg18599155 | ARL8B    | chr3  | 0.66530841  | - T2D risk | TSS1500 |
| cg04368942 | CALD1    | chr7  | 0.665356773 | + T2D risk | Body    |
| cg24336686 | PDE3A    | chr12 | 0.665420416 | + T2D risk | Body    |
| cg14609314 | PPP1R12A | chr12 | 0.665855613 | + T2D risk | Body    |
| cg24334381 | NGLY1    | chr3  | 0.665874595 | + T2D risk | Body    |
| cg12598524 | PRKCE    | chr2  | 0.665904982 | + T2D risk | Body    |
| cg23575527 | PLAGL1   | chr6  | 0.66590523  | + T2D risk | 5'UTR   |
| cg06110059 | SEZ6L    | chr22 | 0.665958672 | + T2D risk | Body    |
| cg10680196 | ACTN4    | chr19 | 0.665998858 | + T2D risk | Body    |
| cg00513611 | KDM4B    | chr19 | 0.666132623 | + T2D risk | Body    |
| cg17202446 | SLIT3    | chr5  | 0.66614905  | + T2D risk | Body    |
| cg12076142 | ADCY5    | chr3  | 0.666204455 | + T2D risk | Body    |
| cg19505398 | DDHD2    | chr8  | 0.666209505 | + T2D risk | ExonBnd |
| cg19505398 | DDHD2    | chr8  | 0.666209505 | + T2D risk | Body    |
| cg02725620 | CUX1     | chr7  | 0.666211502 | + T2D risk | Body    |
| cg07623238 | PACRG    | chr6  | 0.666349586 | + T2D risk | Body    |
| cg23088461 | CNTROB   | chr17 | 0.666357369 | - T2D risk | TSS200  |
| cg07479547 | PRKAG2   | chr7  | 0.66644365  | + T2D risk | Body    |
| cg10476288 | SPAG9    | chr17 | 0.666478736 | + T2D risk | Body    |
| cg27457655 | GRK5     | chr10 | 0.666513848 | - T2D risk | Body    |
| cg09089066 | PLEKHG3  | chr14 | 0.666565469 | - T2D risk | Body    |
| cg12905931 | TTC28    | chr22 | 0.666726844 | + T2D risk | 3'UTR   |
| cg23175130 | GRK5     | chr10 | 0.666751891 | - T2D risk | Body    |
| cg11569219 | CLOCK    | chr4  | 0.666756995 | + T2D risk | TSS200  |
| cg11569219 | CLOCK    | chr4  | 0.666756995 | + T2D risk | TSS1500 |
| cg14845865 | ATP6V1A  | chr3  | 0.666865407 | + T2D risk | 5'UTR   |
| cg15180253 | KIAA1217 | chr10 | 0.666887626 | + T2D risk | Body    |
| cg09297447 | WWP2     | chr16 | 0.667083413 | + T2D risk | 5'UTR   |
| cg02062237 | ANK2     | chr4  | 0.66714679  | + T2D risk | Body    |
| cg22596515 | GGPS1    | chr1  | 0.667203428 | + T2D risk | TSS200  |
| cg22596515 | GGPS1    | chr1  | 0.667203428 | + T2D risk | TSS1500 |
| cg08452038 | TTC28    | chr22 | 0.667278386 | - T2D risk | Body    |
| cg03156893 | PRKCB    | chr16 | 0.667320252 | + T2D risk | Body    |
| cg20592084 | CUX1     | chr7  | 0.667359712 | - T2D risk | Body    |
| cg06640355 | RPGR     | chrX  | 0.66742782  | + T2D risk | Body    |
| cg22504024 | CUX2     | chr12 | 0.667725016 | + T2D risk | Body    |
| cg03472539 | CREBBP   | chr16 | 0.667731117 | - T2D risk | Body    |
| cg08327371 | PRKCB    | chr16 | 0.667965179 | - T2D risk | Body    |
| cg21864259 | ERC2     | chr3  | 0.668228837 | + T2D risk | TSS1500 |
| cg12513481 | SKAP1    | chr17 | 0.668278269 | - T2D risk | TSS1500 |
| cg16799737 | HMBX1    | chr8  | 0.668411208 | + T2D risk | 5'UTR   |
| cg24956866 | CALD1    | chr7  | 0.668594008 | - T2D risk | TSS200  |
| cg06889202 | PACS2    | chr14 | 0.668649053 | - T2D risk | 5'UTR   |
| cg01819937 | ANK3     | chr10 | 0.668746931 | - T2D risk | Body    |
| cg03157210 | SLIT3    | chr5  | 0.668786882 | + T2D risk | Body    |
| cg08889157 | ATXN1    | chr6  | 0.668787798 | - T2D risk | 5'UTR   |
| cg23653704 | NGF      | chr1  | 0.66879314  | - T2D risk | TSS1500 |
| cg12517452 | ITGA1    | chr5  | 0.668807101 | - T2D risk | TSS200  |
| cg03609034 | CUX1     | chr7  | 0.668973785 | + T2D risk | Body    |
| cg06481807 | NCOA2    | chr8  | 0.668981457 | - T2D risk | Body    |
| cg12247968 | DACH1    | chr13 | 0.669026981 | + T2D risk | TSS1500 |
| cg08256761 | PPP1R12A | chr12 | 0.669069731 | + T2D risk | 3'UTR   |
| cg03075683 | CLEC16A  | chr16 | 0.669103531 | + T2D risk | TSS200  |
| cg00662485 | CLASP2   | chr3  | 0.669169618 | - T2D risk | Body    |
| cg12022967 | ATP8A2   | chr13 | 0.669253198 | - T2D risk | Body    |
| cg26369444 | ARL15    | chr5  | 0.669299289 | + T2D risk | Body    |
| cg18694815 | RTN4     | chr2  | 0.669361649 | - T2D risk | TSS1500 |
| cg16648679 | SLIT3    | chr5  | 0.669516308 | - T2D risk | Body    |
| cg12400070 | SPOCK1   | chr5  | 0.669669136 | + T2D risk | Body    |
| cg16410579 | SLC29A4  | chr7  | 0.669740885 | + T2D risk | 5'UTR   |
| cg10382832 | NGLY1    | chr3  | 0.669886177 | + T2D risk | Body    |
| cg10382832 | NGLY1    | chr3  | 0.669886177 | + T2D risk | TSS1500 |
| cg13533403 | SLC29A4  | chr7  | 0.669972732 | + T2D risk | Body    |
| cg00842122 | GALK2    | chr15 | 0.670124928 | - T2D risk | Body    |
| cg02307880 | CUX1     | chr7  | 0.670130132 | + T2D risk | Body    |



|            |           |       |             |            |         |
|------------|-----------|-------|-------------|------------|---------|
| cg08139059 | PACS2     | chr14 | 0.670143149 | - T2D risk | Body    |
| cg12418686 | ITGA1     | chr5  | 0.670222059 | - T2D risk | Body    |
| cg15478005 | ATP6V1A   | chr3  | 0.670237843 | + T2D risk | TSS200  |
| cg27460675 | GRK5      | chr10 | 0.670254495 | + T2D risk | Body    |
| cg08365618 | NGLY1     | chr3  | 0.670255409 | - T2D risk | Body    |
| cg08365618 | OXSM      | chr3  | 0.670255409 | - T2D risk | TSS1500 |
| cg20465933 | FAM160A1  | chr4  | 0.670403071 | + T2D risk | 5'UTR   |
| cg10320211 | FNIP2     | chr4  | 0.670534786 | + T2D risk | Body    |
| cg27004481 | PDLIM5    | chr4  | 0.670653351 | - T2D risk | 5'UTR   |
| cg27004481 | PDLIM5    | chr4  | 0.670653351 | - T2D risk | Body    |
| cg22355517 | PDE3A     | chr12 | 0.670668822 | - T2D risk | 1stExon |
| cg00078221 | EIF4EBP3  | chr5  | 0.670721705 | + T2D risk | Body    |
| cg02628353 | HNRNPA2B1 | chr7  | 0.670810286 | + T2D risk | TSS1500 |
| cg08836861 | NQO1      | chr16 | 0.670846574 | + T2D risk | Body    |
| cg04340677 | PKD1      | chr2  | 0.670888472 | + T2D risk | Body    |
| cg04340677 | PKD1      | chr2  | 0.670888472 | + T2D risk | 1stExon |
| cg04340677 | PKD1      | chr2  | 0.670888472 | + T2D risk | 5'UTR   |
| cg19292183 | PHF21A    | chr11 | 0.670919676 | - T2D risk | Body    |
| cg25932761 | CUX2      | chr12 | 0.670958727 | - T2D risk | Body    |
| cg23570776 | TANC2     | chr17 | 0.671002716 | + T2D risk | Body    |
| cg22858856 | WDR48     | chr3  | 0.671102045 | - T2D risk | 5'UTR   |
| cg22858856 | WDR48     | chr3  | 0.671102045 | - T2D risk | 1stExon |
| cg16460553 | PPFIBP1   | chr12 | 0.671118993 | - T2D risk | 5'UTR   |
| cg18574112 | PKD1      | chr2  | 0.671291292 | + T2D risk | Body    |
| cg14923176 | SLC9A6    | chrX  | 0.671336348 | + T2D risk | Body    |
| cg24250069 | ANK2      | chr4  | 0.671360451 | + T2D risk | TSS1500 |
| cg06790860 | NQO1      | chr16 | 0.67141074  | + T2D risk | Body    |
| cg13657106 | ARL15     | chr5  | 0.671429218 | + T2D risk | Body    |
| cg21848581 | ATP8A2    | chr13 | 0.671682515 | - T2D risk | Body    |
| cg00657810 | WWP2      | chr16 | 0.671753389 | + T2D risk | Body    |
| cg01915688 | PPP1R12A  | chr12 | 0.671807173 | + T2D risk | Body    |
| cg14329685 | APBA1     | chr9  | 0.671828361 | + T2D risk | TSS1500 |
| cg04781532 | PRKAG2    | chr7  | 0.671883701 | + T2D risk | Body    |
| cg05992501 | GRK5      | chr10 | 0.671909478 | + T2D risk | Body    |
| cg02731148 | ERC2      | chr3  | 0.672020993 | - T2D risk | 3'UTR   |
| cg08975915 | ATP2B1    | chr12 | 0.672024703 | + T2D risk | TSS1500 |
| cg10527300 | COL4A1    | chr13 | 0.672064925 | - T2D risk | Body    |
| cg18002632 | ASH1L     | chr1  | 0.672343944 | + T2D risk | Body    |
| cg14095215 | TTC28     | chr22 | 0.672346239 | + T2D risk | Body    |
| cg00586623 | CLEC16A   | chr16 | 0.67236147  | - T2D risk | TSS1500 |
| cg05806255 | GLG1      | chr16 | 0.672393355 | - T2D risk | Body    |
| cg18998002 | TOP2A     | chr17 | 0.672536866 | - T2D risk | Body    |
| cg10487127 | ATXN1     | chr6  | 0.672657833 | - T2D risk | 5'UTR   |
| cg10487127 | ATXN1     | chr6  | 0.672657833 | - T2D risk | 1stExon |
| cg22355898 | PACRG     | chr6  | 0.672761345 | + T2D risk | Body    |
| cg01825276 | MYO6      | chr6  | 0.672974625 | - T2D risk | 5'UTR   |
| cg26551822 | KIAA1217  | chr10 | 0.673060596 | - T2D risk | 5'UTR   |
| cg24489561 | TENM2     | chr5  | 0.673238499 | - T2D risk | Body    |
| cg07617636 | PRKAG2    | chr7  | 0.673350229 | - T2D risk | Body    |
| cg06888295 | TPCN1     | chr12 | 0.673440171 | + T2D risk | Body    |
| cg20500978 | ROBO2     | chr3  | 0.673447901 | + T2D risk | Body    |
| cg14115597 | SSBP2     | chr5  | 0.673505332 | + T2D risk | Body    |
| cg13042065 | LAMA4     | chr6  | 0.673713873 | + T2D risk | Body    |
| cg05893042 | TBC1D5    | chr3  | 0.673759519 | - T2D risk | Body    |
| cg13627677 | SH3GL2    | chr9  | 0.673846338 | + T2D risk | Body    |
| cg07404252 | PRKAG2    | chr7  | 0.673880656 | + T2D risk | Body    |
| cg12259746 | ATXN1     | chr6  | 0.673882149 | - T2D risk | 5'UTR   |
| cg24483166 | MYO6      | chr6  | 0.673920721 | + T2D risk | Body    |
| cg01600732 | ERC2      | chr3  | 0.673951259 | + T2D risk | Body    |
| cg10518440 | CNTROB    | chr17 | 0.673962836 | + T2D risk | 1stExon |
| cg10518440 | CNTROB    | chr17 | 0.673962836 | + T2D risk | 5'UTR   |
| cg02576744 | KREMEN1   | chr22 | 0.673991628 | + T2D risk | Body    |
| cg23431382 | MEIS2     | chr15 | 0.674003199 | + T2D risk | Body    |
| cg01399051 | CDH22     | chr20 | 0.674020197 | + T2D risk | 5'UTR   |
| cg25462229 | PACRG     | chr6  | 0.674179077 | + T2D risk | Body    |
| cg13502346 | PLEKHG3   | chr14 | 0.67428733  | + T2D risk | TSS1500 |
| cg21034619 | ATP8A2    | chr13 | 0.674392585 | - T2D risk | Body    |
| cg17425584 | CADM1     | chr11 | 0.674531388 | - T2D risk | Body    |
| cg04459481 | GLG1      | chr16 | 0.674555127 | - T2D risk | Body    |
| cg04459481 | GLG1      | chr16 | 0.674555127 | - T2D risk | 1stExon |



|            |          |       |             |            |         |
|------------|----------|-------|-------------|------------|---------|
| cg13344344 | MAST1    | chr19 | 0.674633039 | + T2D risk | Body    |
| cg04324644 | RGS7     | chr1  | 0.674635679 | - T2D risk | Body    |
| cg09776150 | ADCY5    | chr3  | 0.674673924 | - T2D risk | Body    |
| cg18137427 | CLIC5    | chr6  | 0.674732046 | - T2D risk | 5'UTR   |
| cg18137427 | CLIC5    | chr6  | 0.674732046 | - T2D risk | 1stExon |
| cg18137427 | CLIC5    | chr6  | 0.674732046 | - T2D risk | Body    |
| cg10030710 | DIP2C    | chr10 | 0.674762404 | - T2D risk | Body    |
| cg25996290 | ATP8A2   | chr13 | 0.674851953 | + T2D risk | Body    |
| cg08285739 | CTR9     | chr11 | 0.67487883  | + T2D risk | TSS1500 |
| cg21933626 | ADCY5    | chr3  | 0.674901592 | + T2D risk | Body    |
| cg23432930 | CHFR     | chr12 | 0.67502831  | - T2D risk | TSS1500 |
| cg16771677 | RHOA     | chr3  | 0.675159983 | + T2D risk | 3'UTR   |
| cg22514231 | CHID1    | chr11 | 0.675266888 | + T2D risk | TSS200  |
| cg13420975 | LMX1B    | chr9  | 0.675568991 | + T2D risk | Body    |
| cg00294620 | PRKAG2   | chr7  | 0.675599162 | + T2D risk | 5'UTR   |
| cg00294620 | PRKAG2   | chr7  | 0.675599162 | + T2D risk | Body    |
| cg00427086 | ARPP19   | chr15 | 0.675666628 | + T2D risk | TSS200  |
| cg00996959 | CNTNAP2  | chr7  | 0.675703759 | + T2D risk | Body    |
| cg24508208 | CALD1    | chr7  | 0.675768145 | - T2D risk | Body    |
| cg24508208 | CALD1    | chr7  | 0.675768145 | - T2D risk | TSS1500 |
| cg06468203 | CUX1     | chr7  | 0.675859926 | - T2D risk | Body    |
| cg20208292 | FNIP2    | chr4  | 0.675913724 | - T2D risk | Body    |
| cg14052114 | CLASP2   | chr3  | 0.67599071  | - T2D risk | TSS200  |
| cg06353500 | ATP8A2   | chr13 | 0.67607388  | - T2D risk | Body    |
| cg10432654 | GNA12    | chr7  | 0.67624216  | + T2D risk | Body    |
| cg10029496 | PACRG    | chr6  | 0.676373027 | - T2D risk | Body    |
| cg15763628 | DIP2C    | chr10 | 0.676455489 | + T2D risk | Body    |
| cg17336584 | PHACTR1  | chr6  | 0.676616126 | + T2D risk | Body    |
| cg27372750 | ACSS2    | chr20 | 0.676676538 | - T2D risk | Body    |
| cg05779006 | CNTROB   | chr17 | 0.676752422 | + T2D risk | 1stExon |
| cg05779006 | CNTROB   | chr17 | 0.676752422 | + T2D risk | 5'UTR   |
| cg00013255 | ADCY5    | chr3  | 0.676789236 | + T2D risk | Body    |
| cg13246941 | ULK4     | chr3  | 0.676849936 | - T2D risk | Body    |
| cg01755728 | RHOA     | chr3  | 0.676958173 | + T2D risk | TSS200  |
| cg07662557 | GLA      | chrX  | 0.676987549 | - T2D risk | Body    |
| cg02979325 | CUX2     | chr12 | 0.676992371 | + T2D risk | Body    |
| cg09765230 | RHOA     | chr3  | 0.676992735 | - T2D risk | 5'UTR   |
| cg01142212 | PHACTR1  | chr6  | 0.677010186 | - T2D risk | Body    |
| cg03584378 | SLC7A2   | chr8  | 0.677096177 | + T2D risk | 5'UTR   |
| cg09536336 | SLIT3    | chr5  | 0.677102458 | + T2D risk | Body    |
| cg01723019 | KIAA1217 | chr10 | 0.677123    | - T2D risk | 5'UTR   |
| cg01723019 | KIAA1217 | chr10 | 0.677123    | - T2D risk | Body    |
| cg21893456 | DLL4     | chr15 | 0.677183841 | + T2D risk | TSS200  |
| cg11122148 | TSC22D1  | chr13 | 0.677263739 | - T2D risk | TSS200  |
| cg06880494 | CNTNAP2  | chr7  | 0.677274517 | + T2D risk | Body    |
| cg14473568 | ROBO2    | chr3  | 0.677409371 | - T2D risk | TSS1500 |
| cg00004533 | AGPAT3   | chr21 | 0.677639714 | + T2D risk | 3'UTR   |
| cg26416887 | CUX2     | chr12 | 0.677672141 | + T2D risk | Body    |
| cg15525119 | ASXL2    | chr2  | 0.677702039 | - T2D risk | Body    |
| cg17928208 | RAP2A    | chr13 | 0.677711301 | - T2D risk | Body    |
| cg19288979 | NPAT     | chr11 | 0.67776299  | - T2D risk | Body    |
| cg02433515 | MEIS2    | chr15 | 0.677790461 | + T2D risk | Body    |
| cg20907124 | SCAF8    | chr6  | 0.677994144 | + T2D risk | Body    |
| cg06235522 | MEIS2    | chr15 | 0.678023153 | + T2D risk | Body    |
| cg09665520 | CUX2     | chr12 | 0.678067087 | - T2D risk | Body    |
| cg13862927 | APBA1    | chr9  | 0.678086374 | - T2D risk | 5'UTR   |
| cg12084076 | NOL4     | chr18 | 0.678166275 | + T2D risk | TSS1500 |
| cg12084076 | NOL4     | chr18 | 0.678166275 | + T2D risk | TSS200  |
| cg17885959 | ULK4     | chr3  | 0.678171883 | - T2D risk | Body    |
| cg05933932 | DNAH9    | chr17 | 0.678452565 | - T2D risk | Body    |
| cg04105250 | GAD1     | chr2  | 0.678560316 | + T2D risk | Body    |
| cg11043990 | RNF157   | chr17 | 0.678580096 | - T2D risk | Body    |
| cg22814941 | EFR3A    | chr8  | 0.678583554 | + T2D risk | TSS200  |
| cg27548256 | ACTN4    | chr19 | 0.678703088 | + T2D risk | Body    |
| cg26539571 | ATXN1    | chr6  | 0.678756994 | - T2D risk | 5'UTR   |
| cg18379116 | SLIT3    | chr5  | 0.678840572 | + T2D risk | Body    |
| cg21044637 | TSC22D1  | chr13 | 0.678899489 | - T2D risk | Body    |
| cg21044637 | TSC22D1  | chr13 | 0.678899489 | - T2D risk | 5'UTR   |
| cg22877703 | SLC7A2   | chr8  | 0.679110296 | + T2D risk | TSS200  |
| cg22877703 | SLC7A2   | chr8  | 0.679110296 | + T2D risk | 5'UTR   |



|            |          |       |             |            |         |
|------------|----------|-------|-------------|------------|---------|
| cg08459383 | KIAA0355 | chr19 | 0.679139471 | + T2D risk | 5'UTR   |
| cg09186143 | TTC28    | chr22 | 0.679141845 | + T2D risk | Body    |
| cg24963933 | SPOCK1   | chr5  | 0.679241486 | + T2D risk | Body    |
| cg19647783 | KIAA1217 | chr10 | 0.679289479 | - T2D risk | TSS1500 |
| cg19647783 | KIAA1217 | chr10 | 0.679289479 | - T2D risk | 5'UTR   |
| cg21270228 | ANK3     | chr10 | 0.679351287 | + T2D risk | Body    |
| cg08195448 | NOL4     | chr18 | 0.679379497 | - T2D risk | TSS1500 |
| cg03499777 | RAP2A    | chr13 | 0.679440622 | + T2D risk | TSS1500 |
| cg15864612 | DIP2C    | chr10 | 0.679681559 | - T2D risk | Body    |
| cg05632631 | PRKCB    | chr16 | 0.679793458 | + T2D risk | Body    |
| cg02639111 | CDK8     | chr13 | 0.679796261 | - T2D risk | Body    |
| cg05180540 | PDE7A    | chr8  | 0.679801594 | - T2D risk | TSS1500 |
| cg05180540 | PDE7A    | chr8  | 0.679801594 | - T2D risk | Body    |
| cg12778938 | ATP8A2   | chr13 | 0.679856755 | - T2D risk | Body    |
| cg24833675 | ATP8A2   | chr13 | 0.679858058 | - T2D risk | Body    |
| cg08596850 | CUX1     | chr7  | 0.680025381 | + T2D risk | Body    |
| cg17473727 | ULK4     | chr3  | 0.680178844 | + T2D risk | Body    |
| cg01284854 | SLIT3    | chr5  | 0.6802295   | - T2D risk | Body    |
| cg01949584 | PRKAG2   | chr7  | 0.680290115 | - T2D risk | 5'UTR   |
| cg01949584 | PRKAG2   | chr7  | 0.680290115 | - T2D risk | Body    |
| cg13552669 | TENM2    | chr5  | 0.680411392 | + T2D risk | Body    |
| cg01771937 | JPH2     | chr20 | 0.68046583  | + T2D risk | TSS1500 |
| cg26391350 | GAD1     | chr2  | 0.680488562 | - T2D risk | 5'UTR   |
| cg18567941 | COX6A1   | chr12 | 0.680579193 | + T2D risk | 3'UTR   |
| cg02413312 | NCOA2    | chr8  | 0.680597217 | - T2D risk | 5'UTR   |
| cg23015991 | PDE3A    | chr12 | 0.680610303 | - T2D risk | Body    |
| cg09527886 | GNA12    | chr7  | 0.680730691 | + T2D risk | Body    |
| cg01425892 | RGS7     | chr1  | 0.680793543 | + T2D risk | Body    |
| cg25422542 | PRKAG2   | chr7  | 0.680800208 | - T2D risk | Body    |
| cg11026382 | PRKACB   | chr1  | 0.680922887 | - T2D risk | Body    |
| cg16356472 | SLC30A8  | chr8  | 0.680958176 | - T2D risk | 5'UTR   |
| cg01338762 | FBXO11   | chr2  | 0.681060457 | + T2D risk | Body    |
| cg00534479 | SLIT3    | chr5  | 0.681119087 | - T2D risk | Body    |
| cg05115532 | EFCAB14  | chr1  | 0.681165932 | + T2D risk | Body    |
| cg08125503 | NCOR1    | chr17 | 0.681178183 | + T2D risk | TSS1500 |
| cg19422369 | GNA12    | chr7  | 0.681185864 | + T2D risk | Body    |
| cg09457910 | ASXL2    | chr2  | 0.681194244 | + T2D risk | Body    |
| cg14115119 | SPAG9    | chr17 | 0.681409658 | - T2D risk | Body    |
| cg26477455 | EFR3A    | chr8  | 0.68142482  | + T2D risk | Body    |
| cg20069833 | ATP6V1H  | chr8  | 0.681471678 | + T2D risk | Body    |
| cg03198372 | KREMEN1  | chr22 | 0.681517495 | + T2D risk | TSS1500 |
| cg00466500 | CDH22    | chr20 | 0.681551736 | + T2D risk | Body    |
| cg24425628 | NF1      | chr17 | 0.681574333 | + T2D risk | Body    |
| cg06725479 | NDUFB3   | chr2  | 0.681636195 | - T2D risk | 5'UTR   |
| cg23531154 | KIAA1217 | chr10 | 0.681749891 | - T2D risk | 5'UTR   |
| cg24488861 | SPAG9    | chr17 | 0.681806654 | - T2D risk | 5'UTR   |
| cg24488861 | SPAG9    | chr17 | 0.681806654 | - T2D risk | 1stExon |
| cg08619515 | CLEC16A  | chr16 | 0.682023484 | + T2D risk | Body    |
| cg11718566 | MGRN1    | chr16 | 0.682182218 | - T2D risk | Body    |
| cg00549361 | ARL15    | chr5  | 0.682231046 | - T2D risk | Body    |
| cg15005172 | ASH1L    | chr1  | 0.682257891 | + T2D risk | Body    |
| cg02819851 | RBM4     | chr11 | 0.682297157 | - T2D risk | TSS200  |
| cg20024713 | NUP98    | chr11 | 0.682420425 | - T2D risk | Body    |
| cg20024713 | NUP98    | chr11 | 0.682420425 | - T2D risk | ExonBnd |
| cg07421858 | HMBOX1   | chr8  | 0.682720985 | + T2D risk | TSS1500 |
| cg19591408 | KIAA1217 | chr10 | 0.682822302 | - T2D risk | TSS1500 |
| cg05587239 | CUX2     | chr12 | 0.682841278 | + T2D risk | Body    |
| cg24605553 | ATP8A2   | chr13 | 0.6828728   | - T2D risk | Body    |
| cg09003269 | WDR48    | chr3  | 0.682919776 | - T2D risk | Body    |
| cg04674568 | SLIT3    | chr5  | 0.682940248 | - T2D risk | Body    |
| cg20684253 | PRKCB    | chr16 | 0.683305426 | - T2D risk | Body    |
| cg01239944 | GNA12    | chr7  | 0.683339143 | - T2D risk | Body    |
| cg25390658 | CALD1    | chr7  | 0.683431022 | - T2D risk | 1stExon |
| cg25390658 | CALD1    | chr7  | 0.683431022 | - T2D risk | Body    |
| cg25390658 | CALD1    | chr7  | 0.683431022 | - T2D risk | 5'UTR   |
| cg10160276 | TOX3     | chr16 | 0.683468803 | + T2D risk | TSS1500 |
| cg00884606 | NOL4     | chr18 | 0.683646198 | - T2D risk | TSS200  |
| cg11607882 | EFR3A    | chr8  | 0.683686604 | + T2D risk | Body    |
| cg01059768 | CDH22    | chr20 | 0.683746845 | - T2D risk | Body    |
| cg25499746 | ATXN1    | chr6  | 0.683848628 | + T2D risk | 5'UTR   |



|            |         |       |             |            |         |
|------------|---------|-------|-------------|------------|---------|
| cg04978831 | PACRG   | chr6  | 0.683977235 | - T2D risk | Body    |
| cg26034150 | NDUFB3  | chr2  | 0.684087133 | - T2D risk | 5'UTR   |
| cg26034150 | NDUFB3  | chr2  | 0.684087133 | - T2D risk | 1stExon |
| cg07123550 | NCOA2   | chr8  | 0.684369522 | - T2D risk | 5'UTR   |
| cg17332715 | SRPK2   | chr7  | 0.684432053 | + T2D risk | Body    |
| cg05983758 | PDE8A   | chr15 | 0.684617264 | - T2D risk | Body    |
| cg17636538 | AGPAT3  | chr21 | 0.684651707 | + T2D risk | 5'UTR   |
| cg21237360 | RBBP6   | chr16 | 0.684679125 | + T2D risk | 5'UTR   |
| cg21237360 | RBBP6   | chr16 | 0.684679125 | + T2D risk | 1stExon |
| cg19151208 | SRPK2   | chr7  | 0.684713164 | + T2D risk | Body    |
| cg13393612 | CUX1    | chr7  | 0.684736707 | + T2D risk | Body    |
| cg12918839 | LAP3    | chr4  | 0.684742941 | - T2D risk | Body    |
| cg06598622 | ATXN1   | chr6  | 0.684806596 | - T2D risk | 5'UTR   |
| cg23389069 | NPAT    | chr11 | 0.684936467 | + T2D risk | Body    |
| cg19184885 | NPEPPS  | chr17 | 0.684950736 | + T2D risk | 3'UTR   |
| cg18861713 | YWHAQ   | chr2  | 0.684953467 | + T2D risk | Body    |
| cg01238858 | CLEC16A | chr16 | 0.684971754 | - T2D risk | Body    |
| cg27476248 | CUX2    | chr12 | 0.685036509 | + T2D risk | Body    |
| cg16904483 | ZHX2    | chr8  | 0.685053937 | + T2D risk | 5'UTR   |
| cg26918117 | CUX1    | chr7  | 0.685200101 | - T2D risk | Body    |
| cg23842386 | ENAH    | chr1  | 0.685209209 | - T2D risk | 1stExon |
| cg23842386 | ENAH    | chr1  | 0.685209209 | - T2D risk | 5'UTR   |
| cg01049462 | ACTN4   | chr19 | 0.685230878 | - T2D risk | Body    |
| cg04724646 | PDE3A   | chr12 | 0.685280344 | - T2D risk | Body    |
| cg09730369 | PLAGL1  | chr6  | 0.685462623 | + T2D risk | 5'UTR   |
| cg00051022 | SGSM2   | chr17 | 0.685591686 | + T2D risk | Body    |
| cg05314961 | AGPAT3  | chr21 | 0.685660367 | + T2D risk | Body    |
| cg06855877 | TJP1    | chr15 | 0.68576508  | - T2D risk | ExonBnd |
| cg06855877 | TJP1    | chr15 | 0.68576508  | - T2D risk | Body    |
| cg06595510 | ADCY5   | chr3  | 0.685845522 | - T2D risk | Body    |
| cg13710390 | TENM2   | chr5  | 0.685907325 | + T2D risk | Body    |
| cg06769918 | PHACTR1 | chr6  | 0.685969146 | - T2D risk | Body    |
| cg04514983 | NDUFB3  | chr2  | 0.686200363 | + T2D risk | TSS1500 |
| cg13269128 | PDE7A   | chr8  | 0.686216708 | + T2D risk | TSS200  |
| cg04769577 | GNA12   | chr7  | 0.686278604 | + T2D risk | Body    |
| cg04769577 | GNA12   | chr7  | 0.686278604 | + T2D risk | TSS200  |
| cg19798368 | CRYL1   | chr13 | 0.686337329 | + T2D risk | Body    |
| cg19039841 | ATRN    | chr20 | 0.686394694 | - T2D risk | Body    |
| cg19039841 | ATRN    | chr20 | 0.686394694 | - T2D risk | 3'UTR   |
| cg08310866 | KCNJ12  | chr17 | 0.686531219 | - T2D risk | 5'UTR   |
| cg27340209 | ATP6V1H | chr8  | 0.686632965 | + T2D risk | Body    |
| cg14018140 | DIP2C   | chr10 | 0.686665893 | - T2D risk | Body    |
| cg09037026 | PACS1   | chr11 | 0.686731062 | + T2D risk | Body    |
| cg25700789 | GNA12   | chr7  | 0.687053736 | + T2D risk | Body    |
| cg25700789 | GNA12   | chr7  | 0.687053736 | + T2D risk | TSS1500 |
| cg02079060 | ENAH    | chr1  | 0.687074592 | - T2D risk | Body    |
| cg02223062 | TTC28   | chr22 | 0.687115453 | - T2D risk | TSS200  |
| cg00246280 | CUX1    | chr7  | 0.687117523 | - T2D risk | Body    |
| cg09822726 | TANC2   | chr17 | 0.687147343 | + T2D risk | Body    |
| cg12723862 | MET     | chr7  | 0.687223229 | - T2D risk | Body    |
| cg05321442 | SLIT3   | chr5  | 0.687430022 | + T2D risk | Body    |
| cg04585679 | KDM4B   | chr19 | 0.687587166 | - T2D risk | Body    |
| cg10278102 | PRMT3   | chr11 | 0.687620276 | - T2D risk | Body    |
| cg10278102 | PRMT3   | chr11 | 0.687620276 | - T2D risk | 5'UTR   |
| cg11934134 | CLASP2  | chr3  | 0.687626048 | + T2D risk | Body    |
| cg19269426 | GGPS1   | chr1  | 0.687797272 | + T2D risk | Body    |
| cg19269426 | GGPS1   | chr1  | 0.687797272 | + T2D risk | 5'UTR   |
| cg01378578 | PFKFB2  | chr1  | 0.687845861 | + T2D risk | 5'UTR   |
| cg08897388 | LAMA4   | chr6  | 0.687875181 | - T2D risk | 1stExon |
| cg08897388 | LAMA4   | chr6  | 0.687875181 | - T2D risk | 5'UTR   |
| cg17993419 | RNF217  | chr6  | 0.687884757 | + T2D risk | Body    |
| cg09298484 | TSGA10  | chr2  | 0.687915849 | - T2D risk | TSS1500 |
| cg09298484 | TSGA10  | chr2  | 0.687915849 | - T2D risk | 5'UTR   |
| cg26277026 | ST8SIA1 | chr12 | 0.687978604 | + T2D risk | Body    |
| cg16053241 | WWP2    | chr16 | 0.688005357 | + T2D risk | Body    |
| cg11668573 | FNIP2   | chr4  | 0.688068042 | - T2D risk | Body    |
| cg00019093 | UBL3    | chr13 | 0.688202089 | - T2D risk | TSS200  |
| cg27397636 | ERC2    | chr3  | 0.688207344 | - T2D risk | Body    |
| cg16826473 | RHBDD1  | chr2  | 0.688241994 | - T2D risk | 3'UTR   |
| cg24527366 | ADCY5   | chr3  | 0.688289239 | + T2D risk | Body    |



|            |          |       |             |            |         |
|------------|----------|-------|-------------|------------|---------|
| cg24527366 | ADCY5    | chr3  | 0.688289239 | + T2D risk | TSS1500 |
| cg04058799 | PRKAG2   | chr7  | 0.688469701 | - T2D risk | Body    |
| cg05514713 | PHACTR1  | chr6  | 0.688507651 | + T2D risk | Body    |
| cg04717703 | PACS2    | chr14 | 0.688532699 | - T2D risk | Body    |
| cg03849185 | TANC2    | chr17 | 0.68858879  | - T2D risk | Body    |
| cg26752993 | RHOA     | chr3  | 0.688610009 | + T2D risk | TSS1500 |
| cg07061916 | DACH1    | chr13 | 0.688723052 | + T2D risk | TSS200  |
| cg11953820 | MAST1    | chr19 | 0.688878542 | + T2D risk | Body    |
| cg11953820 | MAST1    | chr19 | 0.688878542 | + T2D risk | ExonBnd |
| cg27440834 | SNX4     | chr3  | 0.688914904 | + T2D risk | TSS1500 |
| cg26995924 | RTN4     | chr2  | 0.689058186 | + T2D risk | TSS1500 |
| cg26995924 | RTN4     | chr2  | 0.689058186 | + T2D risk | Body    |
| cg19082416 | DIP2C    | chr10 | 0.689115945 | + T2D risk | 3'UTR   |
| cg06705947 | CUX2     | chr12 | 0.689221198 | + T2D risk | Body    |
| cg14079365 | CUX1     | chr7  | 0.689327326 | + T2D risk | Body    |
| cg11100028 | RTN4     | chr2  | 0.689334393 | + T2D risk | Body    |
| cg11100028 | RTN4     | chr2  | 0.689334393 | + T2D risk | 5'UTR   |
| cg15202874 | TENM2    | chr5  | 0.689352595 | - T2D risk | Body    |
| cg04144768 | DDC      | chr7  | 0.689434392 | - T2D risk | 5'UTR   |
| cg14030346 | CADM1    | chr11 | 0.689471329 | + T2D risk | Body    |
| cg11835785 | KDM4B    | chr19 | 0.689493007 | + T2D risk | 5'UTR   |
| cg25874246 | KIAA1217 | chr10 | 0.689564247 | + T2D risk | Body    |
| cg14863672 | KDM4B    | chr19 | 0.689901096 | + T2D risk | 5'UTR   |
| cg10672155 | ARL15    | chr5  | 0.690001738 | + T2D risk | Body    |
| cg05787590 | PRKCE    | chr2  | 0.690036737 | + T2D risk | Body    |
| cg19161559 | CUX1     | chr7  | 0.690249606 | - T2D risk | Body    |
| cg16602504 | FBXO11   | chr2  | 0.690302294 | - T2D risk | TSS200  |
| cg06015733 | DDHD2    | chr8  | 0.690315921 | + T2D risk | 5'UTR   |
| cg05501546 | SRPK2    | chr7  | 0.690573514 | - T2D risk | Body    |
| cg12227954 | DIP2C    | chr10 | 0.69069558  | + T2D risk | Body    |
| cg05098765 | MDM1     | chr12 | 0.691080612 | + T2D risk | TSS1500 |
| cg09225295 | DYNC111  | chr7  | 0.691082812 | - T2D risk | 5'UTR   |
| cg11645417 | PACRG    | chr6  | 0.69108751  | - T2D risk | Body    |
| cg22384217 | RGS7     | chr1  | 0.691130556 | + T2D risk | Body    |
| cg15509617 | ULK4     | chr3  | 0.691163684 | + T2D risk | Body    |
| cg24975564 | PDE3A    | chr12 | 0.691251054 | - T2D risk | 1stExon |
| cg17338929 | AGPAT3   | chr21 | 0.691453287 | - T2D risk | 5'UTR   |
| cg23727820 | SCAF11   | chr12 | 0.691567112 | - T2D risk | Body    |
| cg08671827 | PACRG    | chr6  | 0.691708049 | - T2D risk | Body    |
| cg15379757 | COL4A1   | chr13 | 0.69177638  | - T2D risk | Body    |
| cg02323694 | PPP1R12A | chr12 | 0.691847628 | + T2D risk | 1stExon |
| cg02323694 | PPP1R12A | chr12 | 0.691847628 | + T2D risk | 5'UTR   |
| cg02323694 | PPP1R12A | chr12 | 0.691847628 | + T2D risk | TSS1500 |
| cg21482536 | SSBP2    | chr5  | 0.691924307 | - T2D risk | 1stExon |
| cg09083108 | PACRG    | chr6  | 0.691941478 | - T2D risk | Body    |
| cg23367857 | CALD1    | chr7  | 0.692008566 | + T2D risk | Body    |
| cg23367857 | CALD1    | chr7  | 0.692008566 | + T2D risk | TSS1500 |
| cg25917442 | MDM1     | chr12 | 0.692062044 | - T2D risk | TSS200  |
| cg13836627 | TJP1     | chr15 | 0.692107533 | + T2D risk | Body    |
| cg25577507 | ENAH     | chr1  | 0.692144536 | + T2D risk | Body    |
| cg26059314 | LMX1B    | chr9  | 0.692247691 | - T2D risk | Body    |
| cg01328392 | ANK2     | chr4  | 0.692254158 | + T2D risk | Body    |
| cg00360780 | MGRN1    | chr16 | 0.692570383 | + T2D risk | Body    |
| cg10868188 | PTP4A2   | chr1  | 0.692600622 | - T2D risk | Body    |
| cg17407652 | KIAA0355 | chr19 | 0.6926338   | + T2D risk | Body    |
| cg19947439 | ST6GAL1  | chr3  | 0.692692271 | + T2D risk | 3'UTR   |
| cg14272125 | PRKCE    | chr2  | 0.692760564 | - T2D risk | Body    |
| cg13722120 | ERC2     | chr3  | 0.69277169  | - T2D risk | 5'UTR   |
| cg25430696 | SGSM2    | chr17 | 0.692794447 | - T2D risk | TSS1500 |
| cg04326566 | CUX1     | chr7  | 0.692800667 | + T2D risk | Body    |
| cg24699699 | EVI5     | chr1  | 0.692888672 | + T2D risk | TSS1500 |
| cg08078265 | PKD1     | chr2  | 0.69290622  | - T2D risk | Body    |
| cg07306605 | FLT1     | chr13 | 0.693019425 | - T2D risk | Body    |
| cg10646607 | KREMEN1  | chr22 | 0.693049325 | - T2D risk | Body    |
| cg05694921 | PTPRU    | chr1  | 0.693049436 | - T2D risk | Body    |
| cg23461512 | ATP2B1   | chr12 | 0.693049449 | - T2D risk | Body    |
| cg12079975 | PRKAG2   | chr7  | 0.693218519 | + T2D risk | Body    |
| cg22519705 | FBXO11   | chr2  | 0.693426093 | + T2D risk | ExonBnd |
| cg22519705 | FBXO11   | chr2  | 0.693426093 | + T2D risk | Body    |
| cg12752882 | SPAG9    | chr17 | 0.693523047 | - T2D risk | Body    |



|            |                 |       |             |            |         |
|------------|-----------------|-------|-------------|------------|---------|
| cg14705232 | <i>TBC1D5</i>   | chr3  | 0.693659456 | - T2D risk | Body    |
| cg24360978 | <i>ROBO2</i>    | chr3  | 0.693735339 | - T2D risk | 5'UTR   |
| cg24360978 | <i>ROBO2</i>    | chr3  | 0.693735339 | - T2D risk | Body    |
| cg06695566 | <i>RSF1</i>     | chr11 | 0.693748975 | - T2D risk | Body    |
| cg18156269 | <i>FNIP2</i>    | chr4  | 0.693789154 | + T2D risk | Body    |
| cg06174407 | <i>KREMEN1</i>  | chr22 | 0.693844591 | + T2D risk | Body    |
| cg22988198 | <i>CPLX2</i>    | chr5  | 0.693903885 | + T2D risk | Body    |
| cg05904317 | <i>PDE5A</i>    | chr4  | 0.693970795 | - T2D risk | Body    |
| cg20783223 | <i>BCAT1</i>    | chr12 | 0.69408683  | - T2D risk | TSS200  |
| cg04208291 | <i>NGF</i>      | chr1  | 0.694145896 | - T2D risk | 5'UTR   |
| cg14173561 | <i>ROBO2</i>    | chr3  | 0.694163099 | - T2D risk | 5'UTR   |
| cg14173561 | <i>ROBO2</i>    | chr3  | 0.694163099 | - T2D risk | Body    |
| cg12444861 | <i>PLAGL1</i>   | chr6  | 0.694182583 | + T2D risk | TSS1500 |
| cg19111422 | <i>ANKHD1</i>   | chr5  | 0.694276893 | + T2D risk | Body    |
| cg01485378 | <i>TBC1D5</i>   | chr3  | 0.694311515 | - T2D risk | 5'UTR   |
| cg01485378 | <i>TBC1D5</i>   | chr3  | 0.694311515 | - T2D risk | 1stExon |
| cg16645977 | <i>SLC29A4</i>  | chr7  | 0.694332303 | - T2D risk | 5'UTR   |
| cg14157570 | <i>DLL4</i>     | chr15 | 0.69438198  | - T2D risk | 3'UTR   |
| cg23513959 | <i>PRKCE</i>    | chr2  | 0.694486988 | - T2D risk | Body    |
| cg14321334 | <i>UNC80</i>    | chr2  | 0.694629446 | + T2D risk | Body    |
| cg03638781 | <i>PRKCB</i>    | chr16 | 0.694709995 | - T2D risk | Body    |
| cg20471982 | <i>NCOR1</i>    | chr17 | 0.694713467 | - T2D risk | ExonBnd |
| cg20471982 | <i>NCOR1</i>    | chr17 | 0.694713467 | - T2D risk | Body    |
| cg23379698 | <i>KREMEN1</i>  | chr22 | 0.694748802 | - T2D risk | Body    |
| cg17028430 | <i>CRYL1</i>    | chr13 | 0.694808806 | + T2D risk | Body    |
| cg24635682 | <i>PTPRU</i>    | chr1  | 0.694843702 | - T2D risk | Body    |
| cg06822340 | <i>CNTNAP2</i>  | chr7  | 0.69488474  | - T2D risk | Body    |
| cg16806497 | <i>CADM1</i>    | chr11 | 0.695227716 | + T2D risk | Body    |
| cg20334591 | <i>UBE2K</i>    | chr4  | 0.695236494 | + T2D risk | Body    |
| cg06840703 | <i>TTC28</i>    | chr22 | 0.695308817 | - T2D risk | Body    |
| cg08441803 | <i>SKAP1</i>    | chr17 | 0.695331263 | + T2D risk | Body    |
| cg25563772 | <i>NF1</i>      | chr17 | 0.695395335 | - T2D risk | Body    |
| cg20535781 | <i>CHFR</i>     | chr12 | 0.695592558 | + T2D risk | TSS1500 |
| cg02395863 | <i>RGS7</i>     | chr1  | 0.695704029 | + T2D risk | Body    |
| cg02953970 | <i>FBXO11</i>   | chr2  | 0.695733878 | + T2D risk | Body    |
| cg12081267 | <i>TMEM131</i>  | chr2  | 0.695927272 | - T2D risk | Body    |
| cg09885320 | <i>PPFIBP1</i>  | chr12 | 0.696003245 | - T2D risk | 5'UTR   |
| cg12760625 | <i>DIP2C</i>    | chr10 | 0.696027763 | - T2D risk | Body    |
| cg08965435 | <i>ARHGAP32</i> | chr11 | 0.696101723 | - T2D risk | ExonBnd |
| cg08965435 | <i>ARHGAP32</i> | chr11 | 0.696101723 | - T2D risk | Body    |
| cg21613389 | <i>RAP1GAP2</i> | chr17 | 0.696397109 | - T2D risk | Body    |
| cg22606703 | <i>MEIS2</i>    | chr15 | 0.696440777 | - T2D risk | Body    |
| cg17189465 | <i>ROBO2</i>    | chr3  | 0.696459379 | + T2D risk | TSS200  |
| cg25557835 | <i>SLC7A2</i>   | chr8  | 0.696465679 | + T2D risk | 5'UTR   |
| cg25557835 | <i>SLC7A2</i>   | chr8  | 0.696465679 | + T2D risk | 1stExon |
| cg13446110 | <i>PDE3A</i>    | chr12 | 0.696639103 | - T2D risk | Body    |
| cg09324830 | <i>ACSS2</i>    | chr20 | 0.69666764  | + T2D risk | Body    |
| cg03459839 | <i>GNA12</i>    | chr7  | 0.696680302 | - T2D risk | Body    |
| cg03459839 | <i>GNA12</i>    | chr7  | 0.696680302 | - T2D risk | TSS200  |
| cg23792314 | <i>BCAT1</i>    | chr12 | 0.696745786 | - T2D risk | Body    |
| cg26144491 | <i>ACSS2</i>    | chr20 | 0.696774293 | - T2D risk | Body    |
| cg10910512 | <i>LAMA4</i>    | chr6  | 0.696997743 | - T2D risk | TSS200  |
| cg16847719 | <i>ATP8A2</i>   | chr13 | 0.697004961 | + T2D risk | Body    |
| cg07098391 | <i>KDR</i>      | chr4  | 0.697018021 | - T2D risk | 1stExon |
| cg21807628 | <i>ITPKB</i>    | chr1  | 0.697082572 | - T2D risk | Body    |
| cg11211690 | <i>CUL1</i>     | chr7  | 0.697092375 | + T2D risk | Body    |
| cg27346982 | <i>RNF157</i>   | chr17 | 0.697142583 | + T2D risk | Body    |
| cg19851979 | <i>RSF1</i>     | chr11 | 0.697214111 | - T2D risk | TSS1500 |
| cg00903437 | <i>DNAH9</i>    | chr17 | 0.697233114 | - T2D risk | TSS1500 |
| cg05218902 | <i>NGLY1</i>    | chr3  | 0.69733548  | + T2D risk | Body    |
| cg05218902 | <i>NGLY1</i>    | chr3  | 0.69733548  | + T2D risk | TSS200  |
| cg21237106 | <i>DIP2C</i>    | chr10 | 0.697529454 | - T2D risk | Body    |
| cg08635765 | <i>SPOCK1</i>   | chr5  | 0.697586132 | + T2D risk | Body    |
| cg22471910 | <i>APC</i>      | chr5  | 0.697794901 | - T2D risk | Body    |
| cg17250223 | <i>TSC22D1</i>  | chr13 | 0.697916281 | - T2D risk | Body    |
| cg17250223 | <i>TSC22D1</i>  | chr13 | 0.697916281 | - T2D risk | TSS1500 |
| cg17250223 | <i>TSC22D1</i>  | chr13 | 0.697916281 | - T2D risk | 5'UTR   |
| cg17250223 | <i>TSC22D1</i>  | chr13 | 0.697916281 | - T2D risk | TSS200  |
| cg08714510 | <i>UXS1</i>     | chr2  | 0.697998544 | - T2D risk | Body    |
| cg08714510 | <i>UXS1</i>     | chr2  | 0.697998544 | - T2D risk | TSS200  |



|            |           |       |             |            |         |
|------------|-----------|-------|-------------|------------|---------|
| cg20785260 | SKAP1     | chr17 | 0.698030297 | - T2D risk | Body    |
| cg17771610 | TSC22D1   | chr13 | 0.698111133 | + T2D risk | Body    |
| cg17771610 | TSC22D1   | chr13 | 0.698111133 | + T2D risk | TSS200  |
| cg04312999 | AGPAT3    | chr21 | 0.698130863 | + T2D risk | Body    |
| cg08523505 | ATXN1     | chr6  | 0.698132492 | + T2D risk | TSS1500 |
| cg25535418 | PLAGL1    | chr6  | 0.698155882 | - T2D risk | TSS1500 |
| cg16427703 | GNA12     | chr7  | 0.698271952 | + T2D risk | Body    |
| cg07390844 | TSHZ1     | chr18 | 0.69836633  | + T2D risk | 5'UTR   |
| cg07390844 | TSHZ1     | chr18 | 0.69836633  | + T2D risk | Body    |
| cg16959075 | PDE8A     | chr15 | 0.69844973  | - T2D risk | 5'UTR   |
| cg16959075 | PDE8A     | chr15 | 0.69844973  | - T2D risk | Body    |
| cg21920959 | MDM1      | chr12 | 0.698824659 | + T2D risk | Body    |
| cg09444931 | EFCAB14   | chr1  | 0.699005852 | - T2D risk | Body    |
| cg23156400 | CADM1     | chr11 | 0.69905542  | - T2D risk | Body    |
| cg15993110 | ZDHHC2    | chr8  | 0.699084329 | - T2D risk | 1stExon |
| cg26372927 | ANK3      | chr10 | 0.699087707 | - T2D risk | 1stExon |
| cg26372927 | ANK3      | chr10 | 0.699087707 | - T2D risk | 5'UTR   |
| cg26372927 | ANK3      | chr10 | 0.699087707 | - T2D risk | Body    |
| cg08381990 | ATXN1     | chr6  | 0.699118998 | - T2D risk | 5'UTR   |
| cg01387972 | WIZ       | chr19 | 0.699239584 | + T2D risk | Body    |
| cg12544794 | TTC28     | chr22 | 0.699315386 | - T2D risk | Body    |
| cg04210645 | RHBDD1    | chr2  | 0.699442247 | - T2D risk | TSS200  |
| cg14387688 | ARPP19    | chr15 | 0.699484369 | - T2D risk | TSS1500 |
| cg11846207 | ARIH1     | chr15 | 0.699498484 | - T2D risk | Body    |
| cg12675345 | SLIT3     | chr5  | 0.699526785 | - T2D risk | Body    |
| cg22649832 | SSBP2     | chr5  | 0.699544231 | - T2D risk | Body    |
| cg25338488 | WWP2      | chr16 | 0.699674108 | - T2D risk | TSS200  |
| cg01763602 | CUX1      | chr7  | 0.699722348 | + T2D risk | Body    |
| cg20434459 | ACTN4     | chr19 | 0.699737173 | + T2D risk | Body    |
| cg22279507 | FARSB     | chr2  | 0.699813655 | + T2D risk | 3'UTR   |
| cg17422574 | RTN4      | chr2  | 0.700017259 | + T2D risk | Body    |
| cg14460953 | CNTROB    | chr17 | 0.700039772 | - T2D risk | 1stExon |
| cg14460953 | CNTROB    | chr17 | 0.700039772 | - T2D risk | 5'UTR   |
| cg17039011 | DIP2C     | chr10 | 0.700079717 | + T2D risk | Body    |
| cg09293391 | PLAGL1    | chr6  | 0.700093298 | - T2D risk | TSS1500 |
| cg13212407 | ATP8A1    | chr4  | 0.700171172 | - T2D risk | Body    |
| cg12121347 | CLEC16A   | chr16 | 0.700180926 | - T2D risk | Body    |
| cg13392051 | NUCB2     | chr11 | 0.700301789 | + T2D risk | 5'UTR   |
| cg25438801 | DIP2C     | chr10 | 0.700303454 | - T2D risk | Body    |
| cg05548393 | SLC30A8   | chr8  | 0.700321379 | - T2D risk | 3'UTR   |
| cg03506452 | CHFR      | chr12 | 0.700340501 | - T2D risk | Body    |
| cg20999864 | HNRNPA2B1 | chr7  | 0.700524665 | + T2D risk | 3'UTR   |
| cg26175410 | RNF157    | chr17 | 0.700566713 | + T2D risk | Body    |
| cg09974756 | GRK5      | chr10 | 0.700608999 | + T2D risk | Body    |
| cg13938098 | LAMA4     | chr6  | 0.70064722  | + T2D risk | TSS200  |
| cg15436030 | ITPKB     | chr1  | 0.700734972 | + T2D risk | Body    |
| cg10367066 | WWP2      | chr16 | 0.700748922 | + T2D risk | 5'UTR   |
| cg26065534 | ATP8A2    | chr13 | 0.700752752 | - T2D risk | Body    |
| cg05745950 | KDR       | chr4  | 0.7008999   | - T2D risk | Body    |
| cg07482547 | MTHFS     | chr15 | 0.700960348 | - T2D risk | 5'UTR   |
| cg07482547 | MTHFS     | chr15 | 0.700960348 | - T2D risk | TSS1500 |
| cg07482547 | MTHFS     | chr15 | 0.700960348 | - T2D risk | TSS200  |
| cg07482547 | MTHFS     | chr15 | 0.700960348 | - T2D risk | 1stExon |
| cg00072158 | FLT1      | chr13 | 0.701090264 | + T2D risk | Body    |
| cg11412766 | RTN4      | chr2  | 0.701123177 | + T2D risk | Body    |
| cg11412766 | RTN4      | chr2  | 0.701123177 | + T2D risk | 1stExon |
| cg11412766 | RTN4      | chr2  | 0.701123177 | + T2D risk | 5'UTR   |
| cg05071623 | ATRNL1    | chr10 | 0.701141708 | - T2D risk | TSS1500 |
| cg06558137 | RCAN2     | chr6  | 0.701175082 | + T2D risk | 5'UTR   |
| cg22102093 | ANK3      | chr10 | 0.701232012 | + T2D risk | Body    |
| cg22774937 | APBA1     | chr9  | 0.701248406 | + T2D risk | 5'UTR   |
| cg06443831 | ASXL2     | chr2  | 0.701510575 | - T2D risk | Body    |
| cg06308522 | ENAH      | chr1  | 0.701524941 | + T2D risk | Body    |
| cg23080845 | ATXN1     | chr6  | 0.70155678  | - T2D risk | 5'UTR   |
| cg16107447 | POLA1     | chrX  | 0.7015705   | - T2D risk | TSS1500 |
| cg07040778 | CHID1     | chr11 | 0.701813354 | + T2D risk | Body    |
| cg11642382 | CNTNAP2   | chr7  | 0.701844726 | - T2D risk | TSS1500 |
| cg22026465 | ERC2      | chr3  | 0.702088501 | + T2D risk | Body    |
| cg02389931 | DIP2C     | chr10 | 0.702100172 | - T2D risk | Body    |
| cg04635783 | ANK3      | chr10 | 0.702435889 | - T2D risk | Body    |



|               |          |       |             |            |         |
|---------------|----------|-------|-------------|------------|---------|
| cg15213493    | APC      | chr5  | 0.702450068 | + T2D risk | Body    |
| cg24315695    | PACS2    | chr14 | 0.70246393  | + T2D risk | Body    |
| cg08241694    | DDC      | chr7  | 0.702525646 | + T2D risk | TSS1500 |
| cg20938379    | PACS1    | chr11 | 0.702588113 | + T2D risk | Body    |
| cg21915904    | RAP1GAP2 | chr17 | 0.702758699 | + T2D risk | Body    |
| cg15798703    | GRK5     | chr10 | 0.702844966 | - T2D risk | Body    |
| cg27533102    | ATRN     | chr20 | 0.702967548 | - T2D risk | TSS1500 |
| cg23551195    | DIP2C    | chr10 | 0.702979376 | + T2D risk | Body    |
| cg24379278    | DENND4C  | chr9  | 0.702991157 | + T2D risk | Body    |
| cg03799220    | ARPP19   | chr15 | 0.703044159 | + T2D risk | Body    |
| cg13765002    | PLAGL1   | chr6  | 0.703046046 | + T2D risk | 5'UTR   |
| cg18143488    | NDUFB3   | chr2  | 0.703206323 | + T2D risk | TSS200  |
| cg15463044    | ST20     | chr15 | 0.703219809 | - T2D risk | 1stExon |
| cg15463044    | ST20     | chr15 | 0.703219809 | - T2D risk | 5'UTR   |
| cg15463044    | ST20     | chr15 | 0.703219809 | - T2D risk | Body    |
| cg21934978    | STX6     | chr1  | 0.70330606  | + T2D risk | Body    |
| cg03499905    | COL4A1   | chr13 | 0.703429514 | - T2D risk | Body    |
| cg14013865    | KIAA1217 | chr10 | 0.703539543 | + T2D risk | Body    |
| cg08727071    | FLT1     | chr13 | 0.703593093 | - T2D risk | Body    |
| cg02246683    | NCOA2    | chr8  | 0.7036042   | + T2D risk | 5'UTR   |
| cg14363125    | CUX1     | chr7  | 0.703622757 | - T2D risk | TSS1500 |
| cg04853151    | TMEM59   | chr1  | 0.703718499 | + T2D risk | TSS200  |
| cg10743858    | SLIT3    | chr5  | 0.703807999 | + T2D risk | Body    |
| cg09396107    | EFR3A    | chr8  | 0.70390591  | - T2D risk | Body    |
| cg09132619    | ATXN1    | chr6  | 0.704210589 | + T2D risk | 5'UTR   |
| cg16765394    | TAB2     | chr6  | 0.704450968 | + T2D risk | Body    |
| cg02968405    | SLIT3    | chr5  | 0.704488349 | - T2D risk | Body    |
| cg01625595    | DIP2C    | chr10 | 0.7045078   | - T2D risk | Body    |
| cg22284828    | PTPRU    | chr1  | 0.704527445 | - T2D risk | TSS1500 |
| cg05539369    | FNIP2    | chr4  | 0.704573466 | + T2D risk | TSS1500 |
| cg04271999    | BIRC5    | chr17 | 0.704606021 | + T2D risk | Body    |
| cg11791210    | NOL4     | chr18 | 0.704648001 | - T2D risk | TSS1500 |
| cg14572634    | TOP2A    | chr17 | 0.704751777 | - T2D risk | TSS200  |
| cg01233620    | CLEC16A  | chr16 | 0.704814997 | + T2D risk | Body    |
| cg02410304    | DIP2C    | chr10 | 0.704833993 | + T2D risk | Body    |
| cg27564931    | PRKCE    | chr2  | 0.704890495 | - T2D risk | Body    |
| cg01563515    | ST6GAL1  | chr3  | 0.70489464  | - T2D risk | 5'UTR   |
| cg23196346    | KIAA1217 | chr10 | 0.704905915 | + T2D risk | Body    |
| cg09846146    | GRK5     | chr10 | 0.704922213 | + T2D risk | Body    |
| cg06121719    | DENND4C  | chr9  | 0.704929839 | + T2D risk | Body    |
| cg09867705    | PDLIM5   | chr4  | 0.705156071 | + T2D risk | 5'UTR   |
| cg09867705    | PDLIM5   | chr4  | 0.705156071 | + T2D risk | Body    |
| cg14402224    | DDC      | chr7  | 0.705437935 | - T2D risk | Body    |
| cg13646260    | SRPK2    | chr7  | 0.705457368 | + T2D risk | Body    |
| cg06546717    | TPCN1    | chr12 | 0.70555782  | - T2D risk | 5'UTR   |
| cg09049209    | CUX1     | chr7  | 0.705747082 | - T2D risk | Body    |
| cg20482960    | CNTNAP2  | chr7  | 0.705779429 | + T2D risk | Body    |
| cg11637968    | FNIP2    | chr4  | 0.705779739 | - T2D risk | Body    |
| ch.7.2184863F | CUX1     | chr7  | 0.705796884 | - T2D risk | Body    |
| cg01100494    | SLC30A8  | chr8  | 0.705838104 | - T2D risk | 5'UTR   |
| cg14602715    | CPLX2    | chr5  | 0.705903354 | - T2D risk | 5'UTR   |
| cg06645081    | PDE8A    | chr15 | 0.705926749 | - T2D risk | 5'UTR   |
| cg06645081    | PDE8A    | chr15 | 0.705926749 | - T2D risk | Body    |
| cg10468236    | CLEC16A  | chr16 | 0.706048994 | - T2D risk | Body    |
| cg05016335    | LAP3     | chr4  | 0.706149451 | - T2D risk | Body    |
| cg03423221    | CUL1     | chr7  | 0.706155983 | + T2D risk | Body    |
| cg10099445    | JPH2     | chr20 | 0.706200706 | - T2D risk | 3'UTR   |
| cg09568279    | INPP4A   | chr2  | 0.706256215 | + T2D risk | 5'UTR   |
| cg13137321    | FLT1     | chr13 | 0.706293623 | + T2D risk | Body    |
| cg25803041    | ATP8A2   | chr13 | 0.706296148 | + T2D risk | Body    |
| cg10945313    | ANK2     | chr4  | 0.706443494 | + T2D risk | 1stExon |
| cg10945313    | ANK2     | chr4  | 0.706443494 | + T2D risk | 5'UTR   |
| cg22109262    | LAP3     | chr4  | 0.706525976 | + T2D risk | TSS200  |
| cg04934643    | PACS2    | chr14 | 0.706576485 | - T2D risk | Body    |
| cg03699105    | PDK1     | chr2  | 0.706635068 | + T2D risk | Body    |
| cg04969688    | TJP1     | chr15 | 0.706684839 | - T2D risk | TSS200  |
| cg04324126    | RTN4     | chr2  | 0.706838502 | - T2D risk | TSS1500 |
| cg04324126    | RTN4     | chr2  | 0.706838502 | - T2D risk | 1stExon |
| cg04324126    | RTN4     | chr2  | 0.706838502 | - T2D risk | 5'UTR   |
| cg24901995    | CHID1    | chr11 | 0.706922172 | - T2D risk | Body    |



|               |                 |       |             |            |         |
|---------------|-----------------|-------|-------------|------------|---------|
| cg09592903    | <i>RTN4</i>     | chr2  | 0.706927005 | + T2D risk | Body    |
| cg20543426    | <i>ERC2</i>     | chr3  | 0.707049251 | - T2D risk | 3'UTR   |
| cg15146813    | <i>SLC7A2</i>   | chr8  | 0.707050496 | - T2D risk | 5'UTR   |
| cg15146813    | <i>SLC7A2</i>   | chr8  | 0.707050496 | - T2D risk | 1stExon |
| cg12667716    | <i>UBE2K</i>    | chr4  | 0.707085024 | + T2D risk | Body    |
| cg26905572    | <i>ANK3</i>     | chr10 | 0.707122757 | - T2D risk | 1stExon |
| cg26905572    | <i>ANK3</i>     | chr10 | 0.707122757 | - T2D risk | 5'UTR   |
| cg26905572    | <i>ANK3</i>     | chr10 | 0.707122757 | - T2D risk | Body    |
| cg02655980    | <i>GALK2</i>    | chr15 | 0.70715767  | - T2D risk | Body    |
| cg02655980    | <i>GALK2</i>    | chr15 | 0.70715767  | - T2D risk | TSS1500 |
| cg20648463    | <i>GLA</i>      | chrX  | 0.707177857 | + T2D risk | 1stExon |
| cg21665242    | <i>CPLX2</i>    | chr5  | 0.707279569 | + T2D risk | 5'UTR   |
| cg27446600    | <i>RGS7</i>     | chr1  | 0.707506804 | + T2D risk | Body    |
| cg17259759    | <i>PACS1</i>    | chr11 | 0.707512843 | + T2D risk | Body    |
| cg17731696    | <i>PDE7A</i>    | chr8  | 0.70762146  | + T2D risk | Body    |
| cg26959510    | <i>WDR47</i>    | chr1  | 0.707642182 | - T2D risk | TSS1500 |
| cg27005819    | <i>TSGA10</i>   | chr2  | 0.707646118 | - T2D risk | 5'UTR   |
| cg27027069    | <i>MYO6</i>     | chr6  | 0.707661994 | + T2D risk | 3'UTR   |
| cg25052941    | <i>CNTNAP2</i>  | chr7  | 0.707684632 | - T2D risk | Body    |
| cg04146883    | <i>PHF21A</i>   | chr11 | 0.707889226 | - T2D risk | Body    |
| cg01800843    | <i>NPAT</i>     | chr11 | 0.708098862 | - T2D risk | Body    |
| cg24202654    | <i>GAD1</i>     | chr2  | 0.70812273  | - T2D risk | 5'UTR   |
| cg10978949    | <i>PRKCE</i>    | chr2  | 0.70821167  | + T2D risk | Body    |
| cg00706441    | <i>MAST1</i>    | chr19 | 0.708345219 | - T2D risk | Body    |
| cg13888710    | <i>UBE2K</i>    | chr4  | 0.708456028 | - T2D risk | TSS200  |
| cg09398924    | <i>WDR48</i>    | chr3  | 0.708483727 | - T2D risk | TSS1500 |
| cg23371800    | <i>PDE3A</i>    | chr12 | 0.708552023 | + T2D risk | Body    |
| cg02762966    | <i>NUP98</i>    | chr11 | 0.708566092 | + T2D risk | Body    |
| cg07993842    | <i>PRKCE</i>    | chr2  | 0.708592944 | + T2D risk | Body    |
| cg09403494    | <i>PRKAG2</i>   | chr7  | 0.7086322   | + T2D risk | Body    |
| cg06633573    | <i>ATXN1</i>    | chr6  | 0.709047503 | + T2D risk | 5'UTR   |
| cg00963786    | <i>WWP2</i>     | chr16 | 0.709049368 | - T2D risk | Body    |
| cg02577999    | <i>DNAH9</i>    | chr17 | 0.70912444  | + T2D risk | Body    |
| cg25941682    | <i>PDE8A</i>    | chr15 | 0.709395399 | - T2D risk | Body    |
| cg01144592    | <i>CLEC16A</i>  | chr16 | 0.709446751 | + T2D risk | Body    |
| cg24429310    | <i>CNTNAP2</i>  | chr7  | 0.709599925 | + T2D risk | Body    |
| cg05350612    | <i>ST6GAL1</i>  | chr3  | 0.709614926 | + T2D risk | 5'UTR   |
| cg03416852    | <i>PRKCE</i>    | chr2  | 0.709701831 | - T2D risk | Body    |
| cg19677927    | <i>ZDHHC2</i>   | chr8  | 0.709828204 | - T2D risk | Body    |
| cg09073398    | <i>SLIT3</i>    | chr5  | 0.709856792 | - T2D risk | 1stExon |
| cg09073398    | <i>SLIT3</i>    | chr5  | 0.709856792 | - T2D risk | 5'UTR   |
| cg26504362    | <i>ANK3</i>     | chr10 | 0.710058157 | - T2D risk | Body    |
| cg26739766    | <i>ATRNL1</i>   | chr10 | 0.710097079 | + T2D risk | Body    |
| cg16408583    | <i>GALK2</i>    | chr15 | 0.710150721 | - T2D risk | 5'UTR   |
| cg16408583    | <i>GALK2</i>    | chr15 | 0.710150721 | - T2D risk | 1stExon |
| cg10272779    | <i>RBBP6</i>    | chr16 | 0.710259521 | + T2D risk | Body    |
| cg12081643    | <i>COL4A1</i>   | chr13 | 0.710431286 | - T2D risk | 3'UTR   |
| cg06519442    | <i>SLIT3</i>    | chr5  | 0.710438306 | + T2D risk | Body    |
| cg01332206    | <i>ST8SIA1</i>  | chr12 | 0.710603474 | - T2D risk | 3'UTR   |
| cg20701342    | <i>ATP8A2</i>   | chr13 | 0.710606062 | + T2D risk | Body    |
| cg03021576    | <i>TMEM131</i>  | chr2  | 0.710622929 | - T2D risk | Body    |
| cg16474725    | <i>CLIC5</i>    | chr6  | 0.710763997 | + T2D risk | Body    |
| cg14394264    | <i>PHF21A</i>   | chr11 | 0.710827669 | - T2D risk | 5'UTR   |
| cg11837965    | <i>KDM4B</i>    | chr19 | 0.710938346 | + T2D risk | Body    |
| cg02655912    | <i>UXS1</i>     | chr2  | 0.71096808  | + T2D risk | Body    |
| cg05652840    | <i>GGPS1</i>    | chr1  | 0.710994923 | + T2D risk | TSS200  |
| cg05652840    | <i>GGPS1</i>    | chr1  | 0.710994923 | + T2D risk | TSS1500 |
| cg22685867    | <i>RGS7</i>     | chr1  | 0.711162933 | - T2D risk | Body    |
| cg26361513    | <i>PACS2</i>    | chr14 | 0.711171757 | + T2D risk | Body    |
| cg24002388    | <i>DDHD2</i>    | chr8  | 0.711223403 | - T2D risk | TSS1500 |
| cg01850278    | <i>PPP1R12A</i> | chr12 | 0.711294488 | - T2D risk | Body    |
| cg01850278    | <i>PPP1R12A</i> | chr12 | 0.711294488 | - T2D risk | TSS1500 |
| cg07325041    | <i>TBC1D5</i>   | chr3  | 0.711395338 | - T2D risk | 5'UTR   |
| cg07325041    | <i>TBC1D5</i>   | chr3  | 0.711395338 | - T2D risk | 1stExon |
| cg01897902    | <i>ITPKB</i>    | chr1  | 0.711654328 | - T2D risk | Body    |
| cg00536472    | <i>TSHZ1</i>    | chr18 | 0.711735521 | - T2D risk | 3'UTR   |
| cg25112002    | <i>PACS2</i>    | chr14 | 0.711736974 | + T2D risk | Body    |
| ch.5.2517577F | <i>SPOCK1</i>   | chr5  | 0.711785844 | + T2D risk | Body    |
| cg01850954    | <i>CADM1</i>    | chr11 | 0.711912781 | + T2D risk | Body    |
| cg17470327    | <i>ROBO2</i>    | chr3  | 0.71226242  | - T2D risk | TSS1500 |



|            |          |       |             |            |         |
|------------|----------|-------|-------------|------------|---------|
| cg14391247 | ANK3     | chr10 | 0.712321479 | + T2D risk | 1stExon |
| cg14391247 | ANK3     | chr10 | 0.712321479 | + T2D risk | 5'UTR   |
| cg08549034 | ASXL2    | chr2  | 0.712415689 | - T2D risk | TSS1500 |
| cg14090951 | ANK3     | chr10 | 0.712507406 | - T2D risk | Body    |
| cg09820373 | ARID2    | chr12 | 0.7125772   | - T2D risk | Body    |
| cg25903851 | AGPAT3   | chr21 | 0.71260441  | - T2D risk | 5'UTR   |
| cg16681278 | CADM1    | chr11 | 0.712794262 | + T2D risk | Body    |
| cg01289495 | CALD1    | chr7  | 0.712795262 | - T2D risk | Body    |
| cg02453591 | FARSB    | chr2  | 0.712866929 | + T2D risk | TSS1500 |
| cg18442019 | DIP2C    | chr10 | 0.712892185 | + T2D risk | Body    |
| cg05248742 | PRKCB    | chr16 | 0.713042802 | + T2D risk | Body    |
| cg27386912 | SEMA3G   | chr3  | 0.713212847 | + T2D risk | TSS200  |
| cg18313221 | MET      | chr7  | 0.713266263 | - T2D risk | TSS1500 |
| cg01899253 | FLT1     | chr13 | 0.713439223 | + T2D risk | TSS1500 |
| cg26862981 | ZHX2     | chr8  | 0.713667365 | + T2D risk | 5'UTR   |
| cg02493260 | RTN4     | chr2  | 0.713696839 | + T2D risk | Body    |
| cg02493260 | RTN4     | chr2  | 0.713696839 | + T2D risk | 5'UTR   |
| cg11264363 | CPLX2    | chr5  | 0.71371803  | + T2D risk | 5'UTR   |
| cg05889858 | TANC2    | chr17 | 0.713739366 | + T2D risk | Body    |
| cg01572505 | SPOCK1   | chr5  | 0.713801834 | + T2D risk | Body    |
| cg14264937 | ARHGAP32 | chr11 | 0.713894148 | + T2D risk | Body    |
| cg13181974 | MEIS2    | chr15 | 0.713914296 | + T2D risk | Body    |
| cg23318157 | TMEM150C | chr4  | 0.713927098 | + T2D risk | 5'UTR   |
| cg22997040 | ZHX2     | chr8  | 0.713975526 | + T2D risk | 5'UTR   |
| cg26627888 | MGRN1    | chr16 | 0.713982022 | + T2D risk | Body    |
| cg26627888 | MGRN1    | chr16 | 0.713982022 | + T2D risk | 3'UTR   |
| cg02051583 | SPOCK1   | chr5  | 0.714026594 | - T2D risk | Body    |
| cg24226884 | CUX2     | chr12 | 0.714089002 | + T2D risk | Body    |
| cg21740631 | TENM2    | chr5  | 0.71424654  | - T2D risk | Body    |
| cg26245141 | AMD1     | chr6  | 0.71447137  | - T2D risk | 5'UTR   |
| cg15073016 | CLEC16A  | chr16 | 0.71447917  | - T2D risk | Body    |
| cg23418083 | CREBBP   | chr16 | 0.714646023 | + T2D risk | Body    |
| cg00642293 | ROBO2    | chr3  | 0.714723332 | + T2D risk | 5'UTR   |
| cg00642293 | ROBO2    | chr3  | 0.714723332 | + T2D risk | Body    |
| cg08940827 | TJP1     | chr15 | 0.71472667  | - T2D risk | Body    |
| cg12404799 | CUX1     | chr7  | 0.714764112 | + T2D risk | Body    |
| cg13121150 | DIP2C    | chr10 | 0.71493507  | + T2D risk | Body    |
| cg04544524 | ANK2     | chr4  | 0.715057073 | + T2D risk | Body    |
| cg11605890 | TMEM131  | chr2  | 0.715076375 | - T2D risk | Body    |
| cg14463790 | ATP8A2   | chr13 | 0.715121635 | + T2D risk | Body    |
| cg01123783 | CNTNAP2  | chr7  | 0.715304032 | - T2D risk | Body    |
| cg08809018 | RRAGB    | chrX  | 0.715451095 | + T2D risk | Body    |
| cg06638113 | CNTNAP2  | chr7  | 0.715527085 | + T2D risk | Body    |
| cg11819305 | MAN1A2   | chr1  | 0.715621387 | - T2D risk | 1stExon |
| cg11819305 | MAN1A2   | chr1  | 0.715621387 | - T2D risk | 5'UTR   |
| cg10581503 | ATXN1    | chr6  | 0.715666923 | + T2D risk | 5'UTR   |
| cg22854804 | TTC28    | chr22 | 0.715789943 | + T2D risk | Body    |
| cg14628993 | SH3GL2   | chr9  | 0.715804787 | + T2D risk | Body    |
| cg18603396 | CADM1    | chr11 | 0.715897718 | - T2D risk | TSS200  |
| cg08475042 | UNC80    | chr2  | 0.715997321 | - T2D risk | Body    |
| cg11387591 | PTPRU    | chr1  | 0.716045648 | - T2D risk | Body    |
| cg08781532 | NGF      | chr1  | 0.716063823 | - T2D risk | 1stExon |
| cg08781532 | NGF      | chr1  | 0.716063823 | - T2D risk | 5'UTR   |
| cg13040192 | PFKFB2   | chr1  | 0.716127071 | + T2D risk | Body    |
| cg13040192 | PFKFB2   | chr1  | 0.716127071 | + T2D risk | 3'UTR   |
| cg19617701 | BCAT1    | chr12 | 0.716136214 | + T2D risk | Body    |
| cg08307430 | ARL8B    | chr3  | 0.716155232 | + T2D risk | TSS200  |
| cg17984935 | FLT1     | chr13 | 0.71631428  | + T2D risk | Body    |
| cg05793701 | TBC1D5   | chr3  | 0.716735393 | + T2D risk | 5'UTR   |
| cg02658690 | COL4A1   | chr13 | 0.716890634 | - T2D risk | Body    |
| cg23367478 | PDE3A    | chr12 | 0.7169396   | + T2D risk | TSS1500 |
| cg19457719 | WWP2     | chr16 | 0.717003988 | - T2D risk | Body    |
| cg18565893 | LAMA4    | chr6  | 0.71709782  | - T2D risk | Body    |
| cg03032816 | CALD1    | chr7  | 0.717197434 | + T2D risk | Body    |
| cg11131810 | PHACTR1  | chr6  | 0.717396771 | - T2D risk | Body    |
| cg23828212 | MAN1A2   | chr1  | 0.717486225 | - T2D risk | 1stExon |
| cg23828212 | MAN1A2   | chr1  | 0.717486225 | - T2D risk | 5'UTR   |
| cg03297042 | KREMEN1  | chr22 | 0.717733298 | - T2D risk | TSS1500 |
| cg13199822 | ATP6V1A  | chr3  | 0.717792454 | - T2D risk | 5'UTR   |
| cg18422853 | TJP1     | chr15 | 0.717801103 | - T2D risk | Body    |



|            |          |       |             |            |         |
|------------|----------|-------|-------------|------------|---------|
| cg06990571 | EFR3A    | chr8  | 0.718005691 | - T2D risk | Body    |
| cg03297029 | GRK5     | chr10 | 0.718028936 | - T2D risk | Body    |
| cg22927365 | PRKD1    | chr14 | 0.718285264 | - T2D risk | Body    |
| cg24398023 | RHOA     | chr3  | 0.718291499 | + T2D risk | 1stExon |
| cg24398023 | RHOA     | chr3  | 0.718291499 | + T2D risk | 5'UTR   |
| cg26193484 | ST6GAL1  | chr3  | 0.718316863 | - T2D risk | TSS1500 |
| cg10835547 | ANKHD1   | chr5  | 0.718457738 | - T2D risk | TSS200  |
| cg04179672 | KCNJ18   | chr17 | 0.718616041 | + T2D risk | TSS200  |
| cg04179672 | KCNJ12   | chr17 | 0.718616041 | + T2D risk | 5'UTR   |
| cg03288942 | TENM2    | chr5  | 0.718647565 | + T2D risk | Body    |
| cg07402003 | TOX3     | chr16 | 0.718677481 | + T2D risk | Body    |
| cg26960562 | DNAH9    | chr17 | 0.718783413 | + T2D risk | TSS200  |
| cg02930556 | SRPK2    | chr7  | 0.71894264  | + T2D risk | Body    |
| cg14283783 | FLT1     | chr13 | 0.718950443 | + T2D risk | TSS1500 |
| cg22244815 | PDLIM5   | chr4  | 0.7190683   | - T2D risk | 5'UTR   |
| cg22244815 | PDLIM5   | chr4  | 0.7190683   | - T2D risk | Body    |
| cg17469471 | UXS1     | chr2  | 0.71909113  | + T2D risk | Body    |
| cg04330057 | ATXN1    | chr6  | 0.719131367 | - T2D risk | 3'UTR   |
| cg08945980 | CNTNAP2  | chr7  | 0.719270813 | + T2D risk | Body    |
| cg06085672 | DDC      | chr7  | 0.71928078  | + T2D risk | Body    |
| cg13765368 | KCNJ12   | chr17 | 0.719302418 | + T2D risk | 5'UTR   |
| cg23376470 | NF1      | chr17 | 0.719315176 | - T2D risk | Body    |
| cg10362426 | TMEM59   | chr1  | 0.719468489 | + T2D risk | 1stExon |
| cg26573334 | TPCN1    | chr12 | 0.719501687 | + T2D risk | Body    |
| cg06861892 | RET      | chr10 | 0.7195372   | + T2D risk | Body    |
| cg07237626 | SVIP     | chr11 | 0.719660712 | + T2D risk | 1stExon |
| cg27238079 | ITGB1    | chr10 | 0.719708461 | - T2D risk | TSS1500 |
| cg27238079 | ITGB1    | chr10 | 0.719708461 | - T2D risk | 5'UTR   |
| cg27238079 | ITGB1    | chr10 | 0.719708461 | - T2D risk | 1stExon |
| cg10363569 | PRKAG2   | chr7  | 0.71974445  | + T2D risk | Body    |
| cg23196741 | DNAJC1   | chr10 | 0.719905472 | + T2D risk | Body    |
| cg11625950 | PHF21A   | chr11 | 0.719976447 | - T2D risk | 5'UTR   |
| cg08388746 | TMEM59   | chr1  | 0.720058435 | - T2D risk | Body    |
| cg22724329 | ANK3     | chr10 | 0.720273359 | - T2D risk | Body    |
| cg21320095 | KDM4B    | chr19 | 0.720290894 | - T2D risk | 5'UTR   |
| cg15882726 | ANK2     | chr4  | 0.720476518 | - T2D risk | Body    |
| cg09500171 | ATP8A1   | chr4  | 0.720527884 | - T2D risk | Body    |
| cg02905063 | CALD1    | chr7  | 0.72061769  | + T2D risk | Body    |
| cg17814717 | PRKAG2   | chr7  | 0.720663974 | + T2D risk | TSS200  |
| cg17814717 | PRKAG2   | chr7  | 0.720663974 | + T2D risk | Body    |
| cg05120716 | PRKCB    | chr16 | 0.720670677 | + T2D risk | Body    |
| cg05585149 | DIP2C    | chr10 | 0.720833811 | + T2D risk | Body    |
| cg21204922 | SLIT3    | chr5  | 0.720867188 | - T2D risk | Body    |
| cg15448554 | ST20     | chr15 | 0.721092663 | - T2D risk | 5'UTR   |
| cg15448554 | ST20     | chr15 | 0.721092663 | - T2D risk | Body    |
| cg05550612 | GLG1     | chr16 | 0.721229785 | + T2D risk | TSS1500 |
| cg17850518 | MEIS2    | chr15 | 0.721235187 | + T2D risk | 5'UTR   |
| cg17850518 | MEIS2    | chr15 | 0.721235187 | + T2D risk | 1stExon |
| cg17850518 | MEIS2    | chr15 | 0.721235187 | + T2D risk | TSS1500 |
| cg20643687 | MTHFS    | chr15 | 0.721373308 | + T2D risk | TSS1500 |
| cg20643687 | MTHFS    | chr15 | 0.721373308 | + T2D risk | TSS200  |
| cg08717401 | KIAA1217 | chr10 | 0.721456818 | + T2D risk | 5'UTR   |
| cg22636697 | CDH22    | chr20 | 0.721619092 | + T2D risk | Body    |
| cg01215773 | KIAA1217 | chr10 | 0.721673711 | - T2D risk | Body    |
| cg22477036 | DENND4C  | chr9  | 0.721715702 | - T2D risk | Body    |
| cg02871846 | ACTN4    | chr19 | 0.721780337 | + T2D risk | Body    |
| cg20034100 | RNF217   | chr6  | 0.721887709 | - T2D risk | TSS200  |
| cg10171988 | PDE5A    | chr4  | 0.722299863 | + T2D risk | TSS1500 |
| cg23790980 | CEP126   | chr11 | 0.722303607 | - T2D risk | Body    |
| cg09020665 | SLC7A2   | chr8  | 0.722307856 | + T2D risk | 5'UTR   |
| cg16105531 | FLT1     | chr13 | 0.722317387 | - T2D risk | Body    |
| cg00509923 | DNAH9    | chr17 | 0.722337346 | - T2D risk | Body    |
| cg22170368 | TBC1D5   | chr3  | 0.722378142 | + T2D risk | 5'UTR   |
| cg16935707 | CADM1    | chr11 | 0.722421356 | - T2D risk | Body    |
| cg07457820 | ROBO2    | chr3  | 0.722593361 | + T2D risk | Body    |
| cg03891302 | PHACTR1  | chr6  | 0.722650134 | + T2D risk | Body    |
| cg04160553 | TTC28    | chr22 | 0.722704161 | - T2D risk | Body    |
| cg05071974 | EIF4EBP3 | chr5  | 0.722895893 | - T2D risk | TSS200  |
| cg08189119 | ATP6V1H  | chr8  | 0.72294913  | - T2D risk | Body    |
| cg02689107 | APC      | chr5  | 0.722966336 | - T2D risk | Body    |



|            |          |       |             |            |         |
|------------|----------|-------|-------------|------------|---------|
| cg26056139 | ATP8A2   | chr13 | 0.722983663 | - T2D risk | Body    |
| cg06053291 | WWP2     | chr16 | 0.723082176 | - T2D risk | Body    |
| cg20724032 | ULK4     | chr3  | 0.723205245 | - T2D risk | Body    |
| cg08506924 | CREBBP   | chr16 | 0.723256961 | - T2D risk | TSS1500 |
| cg25466784 | ATXN1    | chr6  | 0.723281321 | - T2D risk | 5'UTR   |
| cg08191490 | LAMA4    | chr6  | 0.723435624 | - T2D risk | Body    |
| cg09418771 | ANK3     | chr10 | 0.723449823 | - T2D risk | Body    |
| cg25787300 | CUX1     | chr7  | 0.723491356 | + T2D risk | Body    |
| cg10895426 | TOX3     | chr16 | 0.723510157 | - T2D risk | 5'UTR   |
| cg10895426 | TOX3     | chr16 | 0.723510157 | - T2D risk | TSS200  |
| cg05488984 | ITPKB    | chr1  | 0.723542221 | + T2D risk | Body    |
| cg10451566 | DLL4     | chr15 | 0.723565035 | + T2D risk | Body    |
| cg24954977 | PDE8A    | chr15 | 0.723656323 | + T2D risk | Body    |
| cg22988851 | ULK4     | chr3  | 0.723683521 | - T2D risk | Body    |
| cg12710176 | PFKFB2   | chr1  | 0.723798734 | - T2D risk | TSS200  |
| cg03529680 | UNC80    | chr2  | 0.723919847 | - T2D risk | Body    |
| cg13033587 | RBBP6    | chr16 | 0.72401151  | + T2D risk | 5'UTR   |
| cg13033587 | RBBP6    | chr16 | 0.72401151  | + T2D risk | 1stExon |
| cg21066599 | FNIP2    | chr4  | 0.724041203 | + T2D risk | Body    |
| cg02988798 | JPH2     | chr20 | 0.72420035  | + T2D risk | Body    |
| cg20336341 | DDC      | chr7  | 0.724218585 | + T2D risk | 5'UTR   |
| cg20336341 | DDC      | chr7  | 0.724218585 | + T2D risk | TSS200  |
| cg14201389 | RSF1     | chr11 | 0.724225936 | - T2D risk | Body    |
| cg25038330 | DIP2C    | chr10 | 0.724231354 | - T2D risk | Body    |
| cg07470526 | RRAGB    | chrX  | 0.724240331 | + T2D risk | 3'UTR   |
| cg00035453 | ARID2    | chr12 | 0.724306044 | + T2D risk | TSS1500 |
| cg14565408 | CUX2     | chr12 | 0.724504004 | + T2D risk | Body    |
| cg22002084 | ANK2     | chr4  | 0.72458289  | - T2D risk | Body    |
| cg08961450 | PDE7A    | chr8  | 0.724614323 | - T2D risk | Body    |
| cg15744049 | DIP2C    | chr10 | 0.724691874 | - T2D risk | TSS1500 |
| cg01234984 | CUX1     | chr7  | 0.724720135 | - T2D risk | Body    |
| cg25194415 | KIAA0232 | chr4  | 0.724734269 | + T2D risk | TSS1500 |
| cg26242818 | RAP1B    | chr12 | 0.724886557 | - T2D risk | 3'UTR   |
| cg04219480 | CHID1    | chr11 | 0.724889908 | + T2D risk | 5'UTR   |
| cg21863172 | PDE8A    | chr15 | 0.724982594 | + T2D risk | 5'UTR   |
| cg21863172 | PDE8A    | chr15 | 0.724982594 | + T2D risk | Body    |
| cg13540860 | DIP2C    | chr10 | 0.725009313 | + T2D risk | Body    |
| cg16073611 | DNAJC1   | chr10 | 0.725097237 | + T2D risk | Body    |
| cg14039432 | CPLX2    | chr5  | 0.725169683 | + T2D risk | TSS1500 |
| cg14039432 | CPLX2    | chr5  | 0.725169683 | + T2D risk | 5'UTR   |
| cg02016150 | GGPS1    | chr1  | 0.725349676 | - T2D risk | TSS1500 |
| cg05340241 | PRKCE    | chr2  | 0.725353553 | - T2D risk | Body    |
| cg11820833 | PLEKHG3  | chr14 | 0.725362796 | - T2D risk | 5'UTR   |
| cg26926387 | CUX2     | chr12 | 0.725377168 | + T2D risk | Body    |
| cg20342079 | BCAT1    | chr12 | 0.725446022 | + T2D risk | Body    |
| cg00887295 | FLT1     | chr13 | 0.725484441 | + T2D risk | Body    |
| cg22218042 | CDH22    | chr20 | 0.725730008 | - T2D risk | 5'UTR   |
| cg15626913 | KIAA1217 | chr10 | 0.725883026 | - T2D risk | TSS200  |
| cg15626913 | KIAA1217 | chr10 | 0.725883026 | - T2D risk | 5'UTR   |
| cg15626913 | KIAA1217 | chr10 | 0.725883026 | - T2D risk | Body    |
| cg07135835 | CUX2     | chr12 | 0.726044597 | - T2D risk | Body    |
| cg19298990 | CLOCK    | chr4  | 0.726092133 | - T2D risk | TSS1500 |
| cg17619804 | PHACTR1  | chr6  | 0.726241692 | - T2D risk | TSS1500 |
| cg15490801 | PRKD1    | chr14 | 0.726480487 | + T2D risk | Body    |
| cg21913301 | PDE3A    | chr12 | 0.726533201 | - T2D risk | Body    |
| cg00857222 | ULK4     | chr3  | 0.726662591 | + T2D risk | Body    |
| cg06817207 | WDR47    | chr1  | 0.726869084 | + T2D risk | TSS1500 |
| cg24164865 | CUX1     | chr7  | 0.72688496  | + T2D risk | Body    |
| cg19781053 | TJP1     | chr15 | 0.727153628 | + T2D risk | TSS1500 |
| cg09097748 | ANK3     | chr10 | 0.727216903 | + T2D risk | Body    |
| cg13139848 | TANC2    | chr17 | 0.727237051 | + T2D risk | Body    |
| cg23869439 | ZDHHC2   | chr8  | 0.727360474 | + T2D risk | Body    |
| cg00408725 | PDE7A    | chr8  | 0.727442692 | + T2D risk | Body    |
| cg16087412 | KCNJ12   | chr17 | 0.727442855 | + T2D risk | 5'UTR   |
| cg26981929 | KIAA1217 | chr10 | 0.727540717 | - T2D risk | 5'UTR   |
| cg09727784 | EVI5     | chr1  | 0.727870295 | + T2D risk | Body    |
| cg01663016 | SLIT3    | chr5  | 0.72787848  | - T2D risk | 1stExon |
| cg01663016 | SLIT3    | chr5  | 0.72787848  | - T2D risk | 5'UTR   |
| cg19499496 | ERC2     | chr3  | 0.727979178 | - T2D risk | Body    |
| cg13399697 | PTPRU    | chr1  | 0.728045246 | - T2D risk | Body    |



|            |          |       |             |            |         |
|------------|----------|-------|-------------|------------|---------|
| cg11522042 | NCOA2    | chr8  | 0.728088101 | + T2D risk | Body    |
| cg13150344 | CHKA     | chr11 | 0.728304094 | + T2D risk | TSS1500 |
| cg22096413 | TMEM131  | chr2  | 0.728311401 | + T2D risk | Body    |
| cg07421429 | ENAH     | chr1  | 0.72834925  | + T2D risk | Body    |
| cg00674848 | CREBBP   | chr16 | 0.728449033 | - T2D risk | Body    |
| cg15195990 | ANKHD1   | chr5  | 0.728496026 | + T2D risk | Body    |
| cg08298491 | KIAA1217 | chr10 | 0.728572952 | - T2D risk | Body    |
| cg01951815 | HMBOX1   | chr8  | 0.728599909 | - T2D risk | Body    |
| cg17300411 | GRK5     | chr10 | 0.728638601 | + T2D risk | Body    |
| cg01508843 | SLIT3    | chr5  | 0.728773281 | - T2D risk | Body    |
| cg00236302 | RAP1B    | chr12 | 0.728818787 | - T2D risk | 5'UTR   |
| cg23724135 | TAB2     | chr6  | 0.728905241 | - T2D risk | 5'UTR   |
| cg23724135 | TAB2     | chr6  | 0.728905241 | - T2D risk | Body    |
| cg20816122 | TMEM131  | chr2  | 0.728991997 | - T2D risk | Body    |
| cg18634690 | GNA12    | chr7  | 0.729091652 | + T2D risk | Body    |
| cg12227337 | DDC      | chr7  | 0.729152406 | + T2D risk | Body    |
| cg04995108 | ATXN1    | chr6  | 0.729289914 | + T2D risk | 5'UTR   |
| cg26752591 | RAP1GAP2 | chr17 | 0.729334509 | - T2D risk | Body    |
| cg14898366 | KDM4B    | chr19 | 0.729344251 | + T2D risk | Body    |
| cg25117444 | ATXN1    | chr6  | 0.729520984 | + T2D risk | 3'UTR   |
| cg01573693 | CLASP2   | chr3  | 0.729551051 | - T2D risk | Body    |
| cg13900431 | ANK2     | chr4  | 0.729725038 | - T2D risk | Body    |
| cg11081275 | DIP2C    | chr10 | 0.729822307 | - T2D risk | Body    |
| cg14506029 | CRYL1    | chr13 | 0.729842351 | - T2D risk | Body    |
| cg18035136 | PHACTR1  | chr6  | 0.729907122 | + T2D risk | 1stExon |
| cg18035136 | PHACTR1  | chr6  | 0.729907122 | + T2D risk | 5'UTR   |
| cg24820593 | PRKCE    | chr2  | 0.72996895  | - T2D risk | Body    |
| cg13756607 | TSGA10   | chr2  | 0.73013278  | + T2D risk | TSS1500 |
| cg01182697 | TMEM59   | chr1  | 0.730180206 | + T2D risk | TSS1500 |
| cg01405879 | DIP2C    | chr10 | 0.730250314 | - T2D risk | Body    |
| cg03707604 | CNTNAP2  | chr7  | 0.73030035  | + T2D risk | Body    |
| cg02825052 | PICALM   | chr11 | 0.730358154 | + T2D risk | Body    |
| cg00426903 | INPP4A   | chr2  | 0.730412542 | - T2D risk | 5'UTR   |
| cg20230369 | CLIC5    | chr6  | 0.730462262 | - T2D risk | 3'UTR   |
| cg20230369 | CLIC5    | chr6  | 0.730462262 | - T2D risk | Body    |
| cg03905224 | CUX1     | chr7  | 0.730660435 | + T2D risk | Body    |
| cg13758290 | ZHX2     | chr8  | 0.730708336 | + T2D risk | 5'UTR   |
| cg15759452 | AGPAT3   | chr21 | 0.730904792 | + T2D risk | 3'UTR   |
| cg16805715 | STX6     | chr1  | 0.730914896 | - T2D risk | Body    |
| cg21467684 | GRK5     | chr10 | 0.730927733 | + T2D risk | Body    |
| cg16431722 | SCAF8    | chr6  | 0.730928808 | - T2D risk | Body    |
| cg20324262 | MAST1    | chr19 | 0.731012884 | - T2D risk | Body    |
| cg13066846 | PRKAG2   | chr7  | 0.731035129 | - T2D risk | 5'UTR   |
| cg13066846 | PRKAG2   | chr7  | 0.731035129 | - T2D risk | Body    |
| cg13889541 | CHFR     | chr12 | 0.73105681  | + T2D risk | Body    |
| cg06023941 | ARL15    | chr5  | 0.731068856 | - T2D risk | Body    |
| cg16385724 | TENM2    | chr5  | 0.731081979 | - T2D risk | Body    |
| cg05029189 | ADCY5    | chr3  | 0.731139979 | + T2D risk | TSS1500 |
| cg00237565 | NGLY1    | chr3  | 0.731182634 | + T2D risk | 1stExon |
| cg00237565 | NGLY1    | chr3  | 0.731182634 | + T2D risk | Body    |
| cg20025033 | TBC1D5   | chr3  | 0.731196582 | - T2D risk | Body    |
| cg07734991 | PACS1    | chr11 | 0.731239014 | + T2D risk | Body    |
| cg19881234 | TSC22D1  | chr13 | 0.731243534 | - T2D risk | 1stExon |
| cg19881234 | TSC22D1  | chr13 | 0.731243534 | - T2D risk | 5'UTR   |
| cg19881234 | TSC22D1  | chr13 | 0.731243534 | - T2D risk | Body    |
| cg06301099 | APBA1    | chr9  | 0.731389499 | - T2D risk | Body    |
| cg11126697 | TJP1     | chr15 | 0.731390323 | - T2D risk | Body    |
| cg04296187 | COL4A1   | chr13 | 0.731490501 | + T2D risk | Body    |
| cg16905413 | PRKCB    | chr16 | 0.731490931 | + T2D risk | Body    |
| cg04380332 | SRPK2    | chr7  | 0.731516205 | + T2D risk | Body    |
| cg01963870 | CREBBP   | chr16 | 0.731526433 | - T2D risk | Body    |
| cg21266189 | SNX4     | chr3  | 0.731547065 | - T2D risk | Body    |
| cg04496254 | CUX2     | chr12 | 0.731684675 | - T2D risk | Body    |
| cg04929428 | ARID2    | chr12 | 0.731730556 | - T2D risk | Body    |
| cg16676373 | PLEKHG3  | chr14 | 0.731775566 | + T2D risk | 5'UTR   |
| cg16106561 | NCOA2    | chr8  | 0.732097856 | + T2D risk | 5'UTR   |
| cg14784784 | FAM155B  | chrX  | 0.732129348 | + T2D risk | Body    |
| cg15704521 | GNA12    | chr7  | 0.732181095 | - T2D risk | Body    |
| cg27219574 | CHFR     | chr12 | 0.732334458 | - T2D risk | Body    |
| cg00224929 | GAD1     | chr2  | 0.732389355 | - T2D risk | Body    |



|            |                 |       |             |            |         |
|------------|-----------------|-------|-------------|------------|---------|
| cg17238473 | <i>TMEM131</i>  | chr2  | 0.732408655 | + T2D risk | Body    |
| cg07337602 | <i>ST6GAL1</i>  | chr3  | 0.732484924 | + T2D risk | 5'UTR   |
| cg07430608 | <i>MDM1</i>     | chr12 | 0.732523613 | + T2D risk | Body    |
| cg19900074 | <i>CMTR1</i>    | chr6  | 0.732528369 | + T2D risk | 5'UTR   |
| cg00388248 | <i>KCNJ18</i>   | chr17 | 0.732558487 | - T2D risk | TSS200  |
| cg00388248 | <i>KCNJ12</i>   | chr17 | 0.732558487 | - T2D risk | 5'UTR   |
| cg15715690 | <i>LMCD1</i>    | chr3  | 0.732663648 | - T2D risk | 5'UTR   |
| cg15715690 | <i>LMCD1</i>    | chr3  | 0.732663648 | - T2D risk | Body    |
| cg25647665 | <i>DIP2C</i>    | chr10 | 0.732755439 | + T2D risk | Body    |
| cg17535647 | <i>PDE3A</i>    | chr12 | 0.732783249 | - T2D risk | TSS1500 |
| cg18712103 | <i>ANK3</i>     | chr10 | 0.732938673 | - T2D risk | Body    |
| cg16566279 | <i>CUX1</i>     | chr7  | 0.732968356 | + T2D risk | Body    |
| cg07146799 | <i>MEIS2</i>    | chr15 | 0.733082615 | + T2D risk | Body    |
| cg09401384 | <i>ANK2</i>     | chr4  | 0.733135557 | - T2D risk | Body    |
| cg02989671 | <i>ST8SIA1</i>  | chr12 | 0.733189717 | - T2D risk | TSS1500 |
| cg07638450 | <i>CUX1</i>     | chr7  | 0.733245658 | + T2D risk | Body    |
| cg01071289 | <i>PACRG</i>    | chr6  | 0.733387402 | + T2D risk | Body    |
| cg05652102 | <i>RET</i>      | chr10 | 0.733459671 | + T2D risk | Body    |
| cg25888160 | <i>PHF21A</i>   | chr11 | 0.733582212 | + T2D risk | Body    |
| cg27024488 | <i>RHOA</i>     | chr3  | 0.733584199 | - T2D risk | 5'UTR   |
| cg05246057 | <i>USP29</i>    | chr19 | 0.7337377   | - T2D risk | TSS200  |
| cg16741323 | <i>COL4A1</i>   | chr13 | 0.733755034 | - T2D risk | Body    |
| cg06669892 | <i>PHACTR1</i>  | chr6  | 0.733827466 | - T2D risk | Body    |
| cg20884522 | <i>GNA12</i>    | chr7  | 0.733881026 | + T2D risk | Body    |
| cg20884522 | <i>GNA12</i>    | chr7  | 0.733881026 | + T2D risk | TSS200  |
| cg12451671 | <i>ATXN1</i>    | chr6  | 0.733979597 | - T2D risk | 3'UTR   |
| cg08877580 | <i>PDE7A</i>    | chr8  | 0.734029265 | - T2D risk | Body    |
| cg00217553 | <i>ARL8B</i>    | chr3  | 0.734059745 | - T2D risk | Body    |
| cg03045425 | <i>NOL4</i>     | chr18 | 0.734196538 | - T2D risk | TSS200  |
| cg00055595 | <i>GAD1</i>     | chr2  | 0.734263919 | + T2D risk | 5'UTR   |
| cg08935301 | <i>LMCD1</i>    | chr3  | 0.734326322 | + T2D risk | Body    |
| cg08712336 | <i>SLIT3</i>    | chr5  | 0.734330615 | - T2D risk | Body    |
| cg09831558 | <i>SCAF8</i>    | chr6  | 0.734374627 | - T2D risk | Body    |
| cg05678725 | <i>AGPAT3</i>   | chr21 | 0.734434091 | + T2D risk | 5'UTR   |
| cg00253204 | <i>NCOR1</i>    | chr17 | 0.734472201 | - T2D risk | 5'UTR   |
| cg00253204 | <i>NCOR1</i>    | chr17 | 0.734472201 | - T2D risk | 1stExon |
| cg21463945 | <i>JPH2</i>     | chr20 | 0.734508194 | + T2D risk | Body    |
| cg20301306 | <i>DYNC1I2</i>  | chr2  | 0.734622341 | + T2D risk | 5'UTR   |
| cg20301306 | <i>DYNC1I2</i>  | chr2  | 0.734622341 | + T2D risk | TSS200  |
| cg20301306 | <i>DYNC1I2</i>  | chr2  | 0.734622341 | + T2D risk | 1stExon |
| cg08935434 | <i>CLOCK</i>    | chr4  | 0.734679644 | + T2D risk | Body    |
| cg19512783 | <i>PACS2</i>    | chr14 | 0.734957756 | + T2D risk | Body    |
| cg13404054 | <i>NOTCH3</i>   | chr19 | 0.735157195 | - T2D risk | 1stExon |
| cg06274699 | <i>KANTR</i>    | chrX  | 0.735159853 | + T2D risk | Body    |
| cg00245454 | <i>FNIP2</i>    | chr4  | 0.735171778 | - T2D risk | Body    |
| cg00155788 | <i>SLIT3</i>    | chr5  | 0.735246049 | - T2D risk | Body    |
| cg07092805 | <i>CRYL1</i>    | chr13 | 0.73525448  | + T2D risk | Body    |
| cg16807961 | <i>RAP1GAP2</i> | chr17 | 0.735273439 | + T2D risk | 1stExon |
| cg04168708 | <i>TBC1D5</i>   | chr3  | 0.735285192 | - T2D risk | Body    |
| cg20863800 | <i>CUX1</i>     | chr7  | 0.735335611 | - T2D risk | Body    |
| cg03928900 | <i>ERC2</i>     | chr3  | 0.735338849 | + T2D risk | 3'UTR   |
| cg19026125 | <i>DIP2C</i>    | chr10 | 0.735383559 | + T2D risk | Body    |
| cg17651653 | <i>PRKD1</i>    | chr14 | 0.735408853 | - T2D risk | Body    |
| cg19551848 | <i>CNTNAP2</i>  | chr7  | 0.73561558  | - T2D risk | Body    |
| cg23796040 | <i>EFR3A</i>    | chr8  | 0.735705108 | - T2D risk | Body    |
| cg05453071 | <i>PDE5A</i>    | chr4  | 0.735866483 | + T2D risk | Body    |
| cg09403042 | <i>ENAH</i>     | chr1  | 0.735879119 | + T2D risk | Body    |
| cg01316816 | <i>RTN4</i>     | chr2  | 0.735914514 | + T2D risk | TSS200  |
| cg01316816 | <i>RTN4</i>     | chr2  | 0.735914514 | + T2D risk | Body    |
| cg00279530 | <i>SPOCK1</i>   | chr5  | 0.735957541 | + T2D risk | Body    |
| cg21756465 | <i>DYNC1I2</i>  | chr2  | 0.735963225 | + T2D risk | TSS200  |
| cg20611411 | <i>RAP1GAP2</i> | chr17 | 0.735977748 | - T2D risk | Body    |
| cg01955828 | <i>ARPP19</i>   | chr15 | 0.736051794 | + T2D risk | Body    |
| cg06241765 | <i>HMBOX1</i>   | chr8  | 0.736058582 | - T2D risk | 5'UTR   |
| cg06241765 | <i>HMBOX1</i>   | chr8  | 0.736058582 | - T2D risk | 1stExon |
| cg04785555 | <i>FNIP2</i>    | chr4  | 0.736277075 | - T2D risk | Body    |
| cg04980712 | <i>ROBO2</i>    | chr3  | 0.736382279 | - T2D risk | Body    |
| cg23987876 | <i>PTPRU</i>    | chr1  | 0.736406292 | - T2D risk | TSS1500 |
| cg03092390 | <i>ZDHHC2</i>   | chr8  | 0.73660331  | - T2D risk | Body    |
| cg00343217 | <i>ARIH1</i>    | chr15 | 0.736622279 | - T2D risk | 1stExon |



|            |           |       |             |            |         |
|------------|-----------|-------|-------------|------------|---------|
| cg20522673 | ATP8A1    | chr4  | 0.736627091 | - T2D risk | Body    |
| cg12933116 | ZHX2      | chr8  | 0.736665323 | + T2D risk | 5'UTR   |
| cg03711622 | HNRNPA2B1 | chr7  | 0.736691248 | - T2D risk | TSS1500 |
| cg19806031 | MEIS2     | chr15 | 0.73674079  | - T2D risk | Body    |
| cg05225889 | DIP2C     | chr10 | 0.736742129 | + T2D risk | Body    |
| cg04538404 | FBXO11    | chr2  | 0.736768992 | - T2D risk | TSS1500 |
| cg04538404 | FBXO11    | chr2  | 0.736768992 | - T2D risk | Body    |
| cg09105802 | LAMA4     | chr6  | 0.73688576  | + T2D risk | Body    |
| cg00241745 | DIP2C     | chr10 | 0.737031557 | - T2D risk | Body    |
| cg06537115 | TENM2     | chr5  | 0.737131189 | - T2D risk | Body    |
| cg09544338 | NOTCH3    | chr19 | 0.737202869 | - T2D risk | TSS1500 |
| cg25588559 | FAM155B   | chrX  | 0.73731616  | - T2D risk | 3'UTR   |
| cg05407582 | PDE8A     | chr15 | 0.737353386 | + T2D risk | Body    |
| cg23975144 | COX6A1    | chr12 | 0.737391306 | + T2D risk | TSS200  |
| cg08627391 | TSC22D1   | chr13 | 0.737536517 | - T2D risk | Body    |
| cg08627391 | TSC22D1   | chr13 | 0.737536517 | - T2D risk | TSS1500 |
| cg08627391 | TSC22D1   | chr13 | 0.737536517 | - T2D risk | 5'UTR   |
| cg08627391 | TSC22D1   | chr13 | 0.737536517 | - T2D risk | 1stExon |
| cg02024077 | CNTNAP2   | chr7  | 0.737640131 | - T2D risk | TSS1500 |
| cg13392088 | PRKAG2    | chr7  | 0.737650448 | - T2D risk | Body    |
| cg14830530 | MDM1      | chr12 | 0.738071282 | - T2D risk | Body    |
| cg02250357 | WWP2      | chr16 | 0.738215222 | + T2D risk | TSS1500 |
| cg02813721 | HMBOX1    | chr8  | 0.738311645 | - T2D risk | Body    |
| cg09255851 | RBBP6     | chr16 | 0.738367107 | + T2D risk | Body    |
| cg15769735 | PRKAG2    | chr7  | 0.73847002  | + T2D risk | TSS1500 |
| cg15769735 | PRKAG2    | chr7  | 0.73847002  | + T2D risk | Body    |
| cg18816129 | MEIS2     | chr15 | 0.738496889 | + T2D risk | Body    |
| cg12149996 | DIP2C     | chr10 | 0.73853842  | + T2D risk | Body    |
| cg22323494 | SGSM2     | chr17 | 0.738602374 | + T2D risk | Body    |
| cg05131191 | NUP98     | chr11 | 0.738790315 | + T2D risk | Body    |
| cg19455763 | ITGA1     | chr5  | 0.738800337 | + T2D risk | Body    |
| cg07328688 | ANK2      | chr4  | 0.738806125 | + T2D risk | 3'UTR   |
| cg04113087 | ATP8A2    | chr13 | 0.739039396 | - T2D risk | Body    |
| cg15085377 | ERC2      | chr3  | 0.739044622 | + T2D risk | 3'UTR   |
| cg00758259 | CADM1     | chr11 | 0.739055537 | - T2D risk | Body    |
| cg03958364 | PRKCE     | chr2  | 0.739084419 | - T2D risk | Body    |
| cg09174233 | SH3GL2    | chr9  | 0.73924839  | - T2D risk | TSS200  |
| cg16528305 | DIP2C     | chr10 | 0.739311346 | + T2D risk | Body    |
| cg14355899 | LMX1B     | chr9  | 0.739378127 | + T2D risk | TSS1500 |
| cg12416053 | ROBO2     | chr3  | 0.739493266 | - T2D risk | Body    |
| cg14415390 | MMS19     | chr10 | 0.739657609 | - T2D risk | 5'UTR   |
| cg14415390 | MMS19     | chr10 | 0.739657609 | - T2D risk | Body    |
| cg06150821 | GNA12     | chr7  | 0.739900391 | + T2D risk | Body    |
| cg06150821 | GNA12     | chr7  | 0.739900391 | + T2D risk | TSS200  |
| cg14332665 | DNAJC13   | chr3  | 0.739930891 | - T2D risk | Body    |
| cg15030662 | DIP2C     | chr10 | 0.740002612 | - T2D risk | Body    |
| cg26708235 | ATP8A2    | chr13 | 0.740224802 | + T2D risk | 1stExon |
| cg26835568 | PACRG     | chr6  | 0.740276307 | - T2D risk | Body    |
| cg11987816 | GNA12     | chr7  | 0.740279137 | - T2D risk | Body    |
| cg11987816 | GNA12     | chr7  | 0.740279137 | - T2D risk | TSS1500 |
| cg02295389 | ASXL2     | chr2  | 0.74042729  | - T2D risk | Body    |
| cg26202427 | ANK3      | chr10 | 0.740442357 | + T2D risk | Body    |
| cg13342684 | MEIS2     | chr15 | 0.740447584 | + T2D risk | Body    |
| cg18247897 | DIP2C     | chr10 | 0.7405821   | + T2D risk | Body    |
| cg23718195 | KCNJ12    | chr17 | 0.740636637 | + T2D risk | 5'UTR   |
| cg13550355 | FNIP2     | chr4  | 0.740640529 | - T2D risk | Body    |
| cg14253924 | GNA12     | chr7  | 0.740657752 | - T2D risk | Body    |
| cg04614208 | PACRG     | chr6  | 0.740661752 | + T2D risk | Body    |
| cg24590902 | AMD1      | chr6  | 0.740676761 | - T2D risk | 5'UTR   |
| cg24397554 | CHKA      | chr11 | 0.740712983 | + T2D risk | Body    |
| cg01922891 | MGRN1     | chr16 | 0.74076938  | + T2D risk | Body    |
| cg06938406 | COX6A1    | chr12 | 0.740801815 | + T2D risk | TSS1500 |
| cg17229533 | PLEKHG3   | chr14 | 0.740827425 | - T2D risk | Body    |
| cg12214787 | MET       | chr7  | 0.740998786 | - T2D risk | Body    |
| cg14723977 | WIZ       | chr19 | 0.741023737 | + T2D risk | 3'UTR   |
| cg26683809 | AGPAT3    | chr21 | 0.741146352 | - T2D risk | 5'UTR   |
| cg09592430 | CNTNAP2   | chr7  | 0.74122239  | - T2D risk | Body    |
| cg01372465 | LAMA4     | chr6  | 0.741329576 | - T2D risk | Body    |
| cg00671489 | CDH22     | chr20 | 0.741397101 | - T2D risk | Body    |
| cg00758412 | RAP1B     | chr12 | 0.74143893  | + T2D risk | 5'UTR   |



|            |          |       |             |            |         |
|------------|----------|-------|-------------|------------|---------|
| cg03330372 | PRKAG2   | chr7  | 0.741472189 | - T2D risk | Body    |
| cg26831947 | ROBO2    | chr3  | 0.741527458 | - T2D risk | 5'UTR   |
| cg26831947 | ROBO2    | chr3  | 0.741527458 | - T2D risk | Body    |
| cg24166966 | FBXL2    | chr3  | 0.741570939 | - T2D risk | Body    |
| cg18087491 | PACRG    | chr6  | 0.741572061 | - T2D risk | Body    |
| cg09847994 | CLOCK    | chr4  | 0.741667021 | - T2D risk | 5'UTR   |
| cg19519593 | PDE7A    | chr8  | 0.741674203 | - T2D risk | Body    |
| cg25976932 | ADCY5    | chr3  | 0.741783687 | - T2D risk | Body    |
| cg10995070 | FLT1     | chr13 | 0.741808203 | - T2D risk | Body    |
| cg23717186 | ITPKB    | chr1  | 0.741812731 | + T2D risk | Body    |
| cg08330825 | GGPS1    | chr1  | 0.742169048 | + T2D risk | TSS1500 |
| cg12188016 | SH3GL2   | chr9  | 0.742183415 | - T2D risk | Body    |
| cg21584266 | CMTR1    | chr6  | 0.742267705 | + T2D risk | Body    |
| cg07153180 | DNAH9    | chr17 | 0.742289144 | + T2D risk | Body    |
| cg22918695 | ZHX2     | chr8  | 0.742329447 | + T2D risk | 5'UTR   |
| cg13011390 | MGRN1    | chr16 | 0.742373262 | + T2D risk | TSS1500 |
| cg10537277 | PDE8A    | chr15 | 0.742382112 | + T2D risk | Body    |
| cg16168788 | DYNC1I2  | chr2  | 0.742472579 | - T2D risk | 5'UTR   |
| cg16168788 | DYNC1I2  | chr2  | 0.742472579 | - T2D risk | TSS200  |
| cg14760128 | EVI5     | chr1  | 0.742549728 | - T2D risk | Body    |
| cg13008977 | SLIT3    | chr5  | 0.742587823 | - T2D risk | Body    |
| cg05747803 | DIP2C    | chr10 | 0.742679079 | - T2D risk | Body    |
| cg08141495 | NOLA     | chr18 | 0.742684178 | - T2D risk | Body    |
| cg18643902 | CHKA     | chr11 | 0.742691298 | - T2D risk | TSS200  |
| cg16619352 | CUX2     | chr12 | 0.742727848 | - T2D risk | Body    |
| cg25944416 | ARL8B    | chr3  | 0.742749201 | - T2D risk | TSS1500 |
| cg05300054 | PRKAG2   | chr7  | 0.742751196 | - T2D risk | Body    |
| cg03577157 | SSBP2    | chr5  | 0.742819898 | - T2D risk | 3'UTR   |
| cg08345012 | ERC2     | chr3  | 0.743065081 | + T2D risk | 3'UTR   |
| cg02350414 | CUX2     | chr12 | 0.743114406 | + T2D risk | Body    |
| cg03963853 | MGRN1    | chr16 | 0.74316031  | + T2D risk | Body    |
| cg15183359 | CRYL1    | chr13 | 0.743315697 | - T2D risk | 3'UTR   |
| cg08678311 | PHACTR1  | chr6  | 0.743487349 | - T2D risk | Body    |
| cg09837559 | DNAJC13  | chr3  | 0.743542358 | + T2D risk | Body    |
| cg04458562 | ZHX2     | chr8  | 0.743702281 | + T2D risk | 5'UTR   |
| cg05780479 | KIAA1217 | chr10 | 0.743799451 | - T2D risk | Body    |
| cg23591039 | ENAH     | chr1  | 0.743891482 | - T2D risk | Body    |
| cg17814365 | SGSM2    | chr17 | 0.743954345 | - T2D risk | Body    |
| cg12164713 | MAST1    | chr19 | 0.743996614 | - T2D risk | Body    |
| cg09763393 | ATP8A2   | chr13 | 0.744047082 | - T2D risk | TSS1500 |
| cg24040983 | KIAA0355 | chr19 | 0.744134501 | - T2D risk | 5'UTR   |
| cg19653382 | FARSB    | chr2  | 0.744137371 | - T2D risk | Body    |
| cg19653382 | FARSB    | chr2  | 0.744137371 | - T2D risk | ExonBnd |
| cg24557547 | PDE7A    | chr8  | 0.744159347 | + T2D risk | Body    |
| cg21374208 | DNAJC1   | chr10 | 0.74419267  | - T2D risk | TSS1500 |
| cg14817975 | ARID2    | chr12 | 0.744227634 | - T2D risk | TSS1500 |
| cg15932065 | CNTNAP2  | chr7  | 0.744238705 | + T2D risk | Body    |
| cg24047390 | CNTNAP2  | chr7  | 0.744275523 | + T2D risk | Body    |
| cg18714469 | MTHFS    | chr15 | 0.744292002 | + T2D risk | Body    |
| cg23998942 | CNTNAP2  | chr7  | 0.744311239 | + T2D risk | Body    |
| cg06228648 | ATP8A2   | chr13 | 0.744387223 | - T2D risk | Body    |
| cg17362052 | DKK2     | chr4  | 0.744672303 | + T2D risk | Body    |
| cg25730315 | PTP4A2   | chr1  | 0.744803504 | + T2D risk | Body    |
| cg00916915 | PHF21A   | chr11 | 0.744811645 | + T2D risk | Body    |
| cg05773442 | CHID1    | chr11 | 0.744865483 | + T2D risk | 5'UTR   |
| cg09653905 | MMS19    | chr10 | 0.744877122 | - T2D risk | Body    |
| cg27598761 | DIP2C    | chr10 | 0.745022217 | + T2D risk | Body    |
| cg02871615 | ANK3     | chr10 | 0.745053454 | - T2D risk | Body    |
| cg27266176 | PLEKHG3  | chr14 | 0.745093287 | - T2D risk | TSS1500 |
| cg18836486 | KDM4B    | chr19 | 0.745503913 | - T2D risk | Body    |
| cg10631527 | CDK8     | chr13 | 0.745510316 | + T2D risk | 3'UTR   |
| cg05752892 | SUB1     | chr5  | 0.745601268 | - T2D risk | TSS200  |
| cg25212699 | CNTROB   | chr17 | 0.745751869 | - T2D risk | Body    |
| cg06833732 | CPLX2    | chr5  | 0.745912439 | + T2D risk | 5'UTR   |
| cg23885934 | TBC1D5   | chr3  | 0.745920408 | - T2D risk | 5'UTR   |
| cg14862395 | CDH22    | chr20 | 0.74629507  | - T2D risk | 1stExon |
| cg13252135 | TAZ      | chrX  | 0.746308636 | + T2D risk | Body    |
| cg08194293 | NCOA2    | chr8  | 0.746322096 | + T2D risk | 5'UTR   |
| cg21606202 | PCYT1A   | chr3  | 0.746348029 | + T2D risk | Body    |
| cg25645732 | CNTNAP2  | chr7  | 0.746725865 | + T2D risk | TSS1500 |



|            |          |       |             |            |         |
|------------|----------|-------|-------------|------------|---------|
| cg27616595 | CNTNAP2  | chr7  | 0.746726307 | + T2D risk | Body    |
| cg20291513 | PFKFB2   | chr1  | 0.746841324 | - T2D risk | TSS1500 |
| cg22593953 | ST6GAL1  | chr3  | 0.747061155 | + T2D risk | Body    |
| cg22569765 | ST6GAL1  | chr3  | 0.747176887 | - T2D risk | 5'UTR   |
| cg09120456 | PDE5A    | chr4  | 0.747428147 | + T2D risk | 1stExon |
| cg09120456 | PDE5A    | chr4  | 0.747428147 | + T2D risk | TSS1500 |
| cg17740289 | ATP8A2   | chr13 | 0.747440549 | - T2D risk | Body    |
| cg09552147 | NUF2     | chr1  | 0.74745592  | + T2D risk | 5'UTR   |
| cg24758273 | CUX1     | chr7  | 0.74796089  | + T2D risk | Body    |
| cg06195829 | PDE7A    | chr8  | 0.748029928 | - T2D risk | 5'UTR   |
| cg06195829 | PDE7A    | chr8  | 0.748029928 | - T2D risk | 1stExon |
| cg16698293 | TMEM59   | chr1  | 0.74807492  | - T2D risk | TSS1500 |
| cg10523026 | TAZ      | chrX  | 0.748077391 | + T2D risk | Body    |
| cg12984223 | SEC31A   | chr4  | 0.748101823 | - T2D risk | 5'UTR   |
| cg20167011 | SPPL2A   | chr15 | 0.74810697  | - T2D risk | TSS1500 |
| cg09107796 | NCOR1    | chr17 | 0.748217413 | - T2D risk | Body    |
| cg21215209 | TSHZ1    | chr18 | 0.748301006 | + T2D risk | 5'UTR   |
| cg21215209 | TSHZ1    | chr18 | 0.748301006 | + T2D risk | Body    |
| cg27612454 | ADCY5    | chr3  | 0.748379288 | + T2D risk | Body    |
| cg16606364 | CHKA     | chr11 | 0.74839058  | - T2D risk | Body    |
| cg11999537 | TBC1D5   | chr3  | 0.748407852 | + T2D risk | Body    |
| cg25565276 | FARSB    | chr2  | 0.748408401 | - T2D risk | TSS200  |
| cg09814151 | TSC22D1  | chr13 | 0.748494977 | + T2D risk | TSS1500 |
| cg16564264 | SKAP1    | chr17 | 0.748694083 | + T2D risk | Body    |
| cg05258123 | CUX1     | chr7  | 0.74873049  | - T2D risk | Body    |
| cg07288445 | TSC22D1  | chr13 | 0.748948244 | - T2D risk | Body    |
| cg11310933 | TPCN1    | chr12 | 0.749169874 | + T2D risk | TSS1500 |
| cg16720809 | PACRG    | chr6  | 0.749203339 | - T2D risk | Body    |
| cg15453708 | PRKAG2   | chr7  | 0.749270112 | - T2D risk | 5'UTR   |
| cg15453708 | PRKAG2   | chr7  | 0.749270112 | - T2D risk | Body    |
| cg10648252 | CUX1     | chr7  | 0.749352073 | + T2D risk | Body    |
| cg21830206 | ACTN4    | chr19 | 0.749619101 | + T2D risk | Body    |
| cg09896867 | TPCN1    | chr12 | 0.749620446 | - T2D risk | 3'UTR   |
| cg16972831 | GNA12    | chr7  | 0.749704644 | - T2D risk | Body    |
| cg09327981 | DYNC111  | chr7  | 0.749860118 | + T2D risk | Body    |
| cg22084515 | SUB1     | chr5  | 0.749882918 | + T2D risk | Body    |
| cg09812397 | TJP1     | chr15 | 0.749936084 | - T2D risk | Body    |
| cg11578870 | AGPAT3   | chr21 | 0.749968652 | + T2D risk | 5'UTR   |
| cg13634872 | INPP4A   | chr2  | 0.750009974 | + T2D risk | Body    |
| cg04503570 | ITPKB    | chr1  | 0.750022273 | + T2D risk | Body    |
| cg23488733 | RAP1GAP2 | chr17 | 0.750073811 | + T2D risk | Body    |
| cg10820191 | CUX1     | chr7  | 0.750512104 | - T2D risk | Body    |
| cg16206284 | NCOA2    | chr8  | 0.750697177 | + T2D risk | ExonBnd |
| cg16206284 | NCOA2    | chr8  | 0.750697177 | + T2D risk | Body    |
| cg08408860 | INPP4A   | chr2  | 0.750824606 | + T2D risk | 5'UTR   |
| cg06686180 | ATP4A    | chr19 | 0.751020996 | - T2D risk | TSS1500 |
| cg01801603 | ZHX2     | chr8  | 0.751051788 | + T2D risk | 5'UTR   |
| cg07450598 | GRK5     | chr10 | 0.751168956 | - T2D risk | Body    |
| cg20729373 | SRPK2    | chr7  | 0.751180126 | - T2D risk | Body    |
| cg09619064 | GAD1     | chr2  | 0.751271604 | - T2D risk | Body    |
| cg19147400 | TAB2     | chr6  | 0.751549525 | - T2D risk | 5'UTR   |
| cg19147400 | TAB2     | chr6  | 0.751549525 | - T2D risk | Body    |
| cg19147400 | TAB2     | chr6  | 0.751549525 | - T2D risk | TSS200  |
| cg15488570 | CHID1    | chr11 | 0.751641387 | + T2D risk | Body    |
| cg21804673 | ARL15    | chr5  | 0.751656404 | - T2D risk | Body    |
| cg14621209 | MYO6     | chr6  | 0.751680598 | - T2D risk | Body    |
| cg14949892 | CHFR     | chr12 | 0.751765532 | + T2D risk | Body    |
| cg13653580 | ATXN1    | chr6  | 0.751805697 | + T2D risk | TSS1500 |
| cg23140118 | ATP8A2   | chr13 | 0.75187723  | - T2D risk | Body    |
| cg22224691 | WIZ      | chr19 | 0.751885534 | + T2D risk | Body    |
| cg00160464 | TENM2    | chr5  | 0.751951138 | - T2D risk | Body    |
| cg05265985 | PRMT3    | chr11 | 0.752079154 | - T2D risk | Body    |
| cg25474616 | CCNB1    | chr5  | 0.752240391 | + T2D risk | TSS1500 |
| cg12889538 | PRKAG2   | chr7  | 0.752394246 | - T2D risk | TSS1500 |
| cg12889538 | PRKAG2   | chr7  | 0.752394246 | - T2D risk | Body    |
| cg25752163 | CUX2     | chr12 | 0.752508838 | + T2D risk | TSS1500 |
| cg03099144 | RNF217   | chr6  | 0.752527999 | + T2D risk | 5'UTR   |
| cg23799246 | INPP4A   | chr2  | 0.752532271 | + T2D risk | 5'UTR   |
| cg11720490 | TMEM131  | chr2  | 0.752575401 | - T2D risk | Body    |
| cg06401532 | PRKCB    | chr16 | 0.752706224 | + T2D risk | Body    |



|            |          |       |             |            |         |
|------------|----------|-------|-------------|------------|---------|
| cg11344013 | KCNJ12   | chr17 | 0.752708914 | - T2D risk | 3'UTR   |
| cg14246940 | LMX1B    | chr9  | 0.752962341 | - T2D risk | Body    |
| cg15674520 | TSGA10   | chr2  | 0.752972465 | - T2D risk | Body    |
| cg06803580 | DIP2C    | chr10 | 0.753062523 | + T2D risk | Body    |
| cg15661715 | PRKAG2   | chr7  | 0.753310444 | - T2D risk | Body    |
| cg06847428 | TBC1D5   | chr3  | 0.753338413 | - T2D risk | 5'UTR   |
| cg05839294 | DNAJC13  | chr3  | 0.753366126 | - T2D risk | Body    |
| cg22656048 | DIP2C    | chr10 | 0.753368387 | - T2D risk | Body    |
| cg13100918 | ATP8A1   | chr4  | 0.753442404 | + T2D risk | Body    |
| cg01946364 | CPLX2    | chr5  | 0.753491605 | - T2D risk | 5'UTR   |
| cg13105122 | PDE7A    | chr8  | 0.753602114 | + T2D risk | Body    |
| cg16660359 | CREBBP   | chr16 | 0.753641571 | + T2D risk | Body    |
| cg08048933 | KDR      | chr4  | 0.753645776 | + T2D risk | TSS1500 |
| cg01872330 | MGRN1    | chr16 | 0.753668781 | - T2D risk | Body    |
| cg08897044 | MAST1    | chr19 | 0.753717038 | + T2D risk | Body    |
| cg09880359 | SGSM2    | chr17 | 0.753766175 | + T2D risk | Body    |
| cg10088426 | PDE7A    | chr8  | 0.753792927 | + T2D risk | Body    |
| cg21223481 | GAD1     | chr2  | 0.753841331 | - T2D risk | Body    |
| cg09299628 | SKAP1    | chr17 | 0.753992282 | - T2D risk | Body    |
| cg00079485 | KCNJ12   | chr17 | 0.754043485 | - T2D risk | 3'UTR   |
| cg07853992 | SPAG9    | chr17 | 0.75405964  | - T2D risk | Body    |
| cg10348178 | FNIP2    | chr4  | 0.754062126 | - T2D risk | Body    |
| cg09588476 | ARHGAP32 | chr11 | 0.754272894 | - T2D risk | Body    |
| cg15993538 | GAD1     | chr2  | 0.754313755 | + T2D risk | 5'UTR   |
| cg20620180 | BCAT1    | chr12 | 0.754436571 | - T2D risk | Body    |
| cg02048645 | SPAG9    | chr17 | 0.754516641 | - T2D risk | TSS1500 |
| cg00783321 | SSBP2    | chr5  | 0.75498251  | - T2D risk | Body    |
| cg10333170 | CALD1    | chr7  | 0.755018896 | + T2D risk | 5'UTR   |
| cg16672557 | WIZ      | chr19 | 0.75514348  | + T2D risk | Body    |
| cg06336736 | RCAN2    | chr6  | 0.75515948  | + T2D risk | Body    |
| cg16265553 | ITPKB    | chr1  | 0.755190489 | + T2D risk | Body    |
| cg04618969 | CUX1     | chr7  | 0.755234213 | + T2D risk | Body    |
| cg23081284 | DIP2C    | chr10 | 0.75524508  | + T2D risk | Body    |
| cg01942543 | TOX3     | chr16 | 0.755265037 | + T2D risk | Body    |
| cg26155697 | ITGA1    | chr5  | 0.755396877 | + T2D risk | Body    |
| cg00044638 | PRKAG2   | chr7  | 0.755409293 | + T2D risk | Body    |
| cg20887061 | NUP98    | chr11 | 0.755478469 | - T2D risk | TSS200  |
| cg02188358 | FLT1     | chr13 | 0.755487489 | - T2D risk | Body    |
| cg25996573 | RTN4     | chr2  | 0.755697769 | + T2D risk | Body    |
| cg06474489 | PTPRU    | chr1  | 0.755832843 | + T2D risk | ExonBnd |
| cg06474489 | PTPRU    | chr1  | 0.755832843 | + T2D risk | Body    |
| cg23843044 | ATP8A2   | chr13 | 0.75586534  | - T2D risk | Body    |
| cg12622096 | UNC80    | chr2  | 0.755961596 | - T2D risk | Body    |
| cg09118225 | TENM2    | chr5  | 0.756064728 | - T2D risk | Body    |
| cg17890873 | TPCN1    | chr12 | 0.756093646 | - T2D risk | Body    |
| cg17890873 | TPCN1    | chr12 | 0.756093646 | - T2D risk | ExonBnd |
| cg24505803 | LCA5     | chr6  | 0.756155543 | - T2D risk | TSS1500 |
| cg00639522 | CDH22    | chr20 | 0.756191141 | + T2D risk | Body    |
| cg21482885 | PDLIM5   | chr4  | 0.756264062 | + T2D risk | 5'UTR   |
| cg21482885 | PDLIM5   | chr4  | 0.756264062 | + T2D risk | Body    |
| cg01214260 | NUF2     | chr1  | 0.756397353 | - T2D risk | Body    |
| cg16365445 | ITGB1    | chr10 | 0.756414163 | + T2D risk | 5'UTR   |
| cg21420366 | NGF      | chr1  | 0.756448132 | + T2D risk | 5'UTR   |
| cg09950164 | PACS1    | chr11 | 0.756635297 | - T2D risk | Body    |
| cg12948543 | PACS2    | chr14 | 0.756837928 | + T2D risk | Body    |
| cg00731146 | TPCN1    | chr12 | 0.756841028 | + T2D risk | Body    |
| cg00731146 | TPCN1    | chr12 | 0.756841028 | + T2D risk | TSS1500 |
| cg17926647 | ITPKB    | chr1  | 0.756887196 | - T2D risk | Body    |
| cg21277461 | GRK5     | chr10 | 0.756983829 | + T2D risk | Body    |
| cg16467990 | PACS2    | chr14 | 0.757001552 | + T2D risk | Body    |
| cg12839362 | CLEC16A  | chr16 | 0.757147175 | - T2D risk | Body    |
| cg04342762 | DYNC111  | chr7  | 0.757227378 | - T2D risk | Body    |
| cg07273346 | PACS1    | chr11 | 0.757287628 | + T2D risk | Body    |
| cg01005180 | PRKAG2   | chr7  | 0.757421472 | + T2D risk | Body    |
| cg24663090 | ARL15    | chr5  | 0.75753111  | + T2D risk | 3'UTR   |
| cg23016734 | ROBO2    | chr3  | 0.757648718 | - T2D risk | TSS1500 |
| cg13004236 | DIP2C    | chr10 | 0.757747806 | + T2D risk | Body    |
| cg22341788 | FLT1     | chr13 | 0.757931858 | + T2D risk | Body    |
| cg03884572 | CUX2     | chr12 | 0.757951042 | - T2D risk | Body    |
| cg20644928 | SLIT3    | chr5  | 0.758039285 | + T2D risk | Body    |



|            |         |       |             |            |         |
|------------|---------|-------|-------------|------------|---------|
| cg15920867 | ERC2    | chr3  | 0.758113108 | - T2D risk | 5'UTR   |
| cg18318565 | RET     | chr10 | 0.7582537   | - T2D risk | Body    |
| cg03722044 | CREBBP  | chr16 | 0.758271839 | + T2D risk | Body    |
| cg11020894 | ST6GAL1 | chr3  | 0.758355733 | - T2D risk | 5'UTR   |
| cg18199258 | SKAP1   | chr17 | 0.758359242 | + T2D risk | Body    |
| cg21776667 | PLAGL1  | chr6  | 0.758506751 | - T2D risk | 5'UTR   |
| cg26135290 | NCOA7   | chr6  | 0.758782935 | + T2D risk | Body    |
| cg26135290 | NCOA7   | chr6  | 0.758782935 | + T2D risk | TSS1500 |
| cg25487382 | ITPKB   | chr1  | 0.758804929 | + T2D risk | Body    |
| cg21491176 | MAST1   | chr19 | 0.758926351 | - T2D risk | Body    |
| cg01666600 | KCNJ12  | chr17 | 0.758961011 | + T2D risk | TSS200  |
| cg02941120 | KDM4B   | chr19 | 0.759015795 | - T2D risk | Body    |
| cg01150173 | SRPK2   | chr7  | 0.759038298 | - T2D risk | TSS1500 |
| cg04729386 | ANK3    | chr10 | 0.759067589 | - T2D risk | Body    |
| cg00978808 | ADCY5   | chr3  | 0.759296063 | - T2D risk | Body    |
| cg05867158 | DIP2C   | chr10 | 0.759587348 | - T2D risk | Body    |
| cg27077895 | SPOCK1  | chr5  | 0.759591692 | - T2D risk | Body    |
| cg24260907 | PDE5A   | chr4  | 0.759594468 | + T2D risk | Body    |
| cg14780777 | DIP2C   | chr10 | 0.759681584 | - T2D risk | Body    |
| cg17671461 | LCA5    | chr6  | 0.759692592 | - T2D risk | TSS1500 |
| cg06106170 | PACRG   | chr6  | 0.759785401 | + T2D risk | Body    |
| cg01002264 | GRK5    | chr10 | 0.759791694 | - T2D risk | Body    |
| cg15198786 | TPCN1   | chr12 | 0.759835185 | + T2D risk | TSS200  |
| cg13134248 | ARPP19  | chr15 | 0.759858938 | + T2D risk | 3'UTR   |
| cg12954554 | ZHX2    | chr8  | 0.759947336 | - T2D risk | 5'UTR   |
| cg13302927 | PRKAG2  | chr7  | 0.760046414 | - T2D risk | Body    |
| cg16210827 | CRYL1   | chr13 | 0.760050354 | - T2D risk | Body    |
| cg20705717 | PRKCE   | chr2  | 0.760063862 | + T2D risk | Body    |
| cg11649388 | FLT1    | chr13 | 0.760081648 | - T2D risk | Body    |
| cg23027329 | DIP2C   | chr10 | 0.760194622 | - T2D risk | Body    |
| cg12333493 | UBE2K   | chr4  | 0.760231965 | - T2D risk | Body    |
| cg11051790 | NCOA2   | chr8  | 0.760385642 | - T2D risk | Body    |
| cg14337324 | PACRG   | chr6  | 0.760485307 | - T2D risk | Body    |
| cg05560873 | LAP3    | chr4  | 0.760682911 | + T2D risk | Body    |
| cg21952149 | TANC2   | chr17 | 0.760885282 | + T2D risk | Body    |
| cg16583458 | CUX2    | chr12 | 0.761032472 | + T2D risk | Body    |
| cg12431207 | ATRNL1  | chr10 | 0.76110381  | + T2D risk | Body    |
| cg21085007 | ST20    | chr15 | 0.76114983  | - T2D risk | 1stExon |
| cg21085007 | ST20    | chr15 | 0.76114983  | - T2D risk | 5'UTR   |
| cg21085007 | ST20    | chr15 | 0.76114983  | - T2D risk | Body    |
| cg19952225 | ROBO2   | chr3  | 0.761201991 | + T2D risk | ExonBnd |
| cg19952225 | ROBO2   | chr3  | 0.761201991 | + T2D risk | Body    |
| cg02849309 | PLAGL1  | chr6  | 0.761275231 | + T2D risk | TSS1500 |
| cg08693644 | PACS2   | chr14 | 0.761302479 | - T2D risk | 5'UTR   |
| cg08693644 | PACS2   | chr14 | 0.761302479 | - T2D risk | Body    |
| cg11428758 | TTC28   | chr22 | 0.761425102 | + T2D risk | Body    |
| cg13744589 | PRKAG2  | chr7  | 0.761436049 | - T2D risk | Body    |
| cg16979303 | SPOCK1  | chr5  | 0.761481976 | + T2D risk | Body    |
| cg16205534 | ANK3    | chr10 | 0.761582237 | - T2D risk | Body    |
| cg00776406 | NUP98   | chr11 | 0.761603352 | - T2D risk | Body    |
| cg08448725 | TOX3    | chr16 | 0.761631335 | - T2D risk | TSS1500 |
| cg02305431 | CDK8    | chr13 | 0.761804928 | - T2D risk | Body    |
| cg00096307 | UXS1    | chr2  | 0.76183102  | + T2D risk | Body    |
| cg11046380 | DYNC1I2 | chr2  | 0.761868843 | - T2D risk | TSS1500 |
| cg04061650 | TSGA10  | chr2  | 0.761926242 | + T2D risk | Body    |
| cg11148246 | DYNC1I1 | chr7  | 0.76193286  | - T2D risk | Body    |
| cg17641101 | EFCAB14 | chr1  | 0.761962436 | + T2D risk | Body    |
| cg09437692 | CUX1    | chr7  | 0.762013521 | - T2D risk | Body    |
| cg07397958 | GALK2   | chr15 | 0.762026744 | + T2D risk | 5'UTR   |
| cg07397958 | GALK2   | chr15 | 0.762026744 | + T2D risk | Body    |
| cg12050728 | SGSM2   | chr17 | 0.762168587 | - T2D risk | Body    |
| cg17955564 | RANBP17 | chr5  | 0.762330006 | - T2D risk | TSS1500 |
| cg22378874 | GRK5    | chr10 | 0.762443007 | + T2D risk | Body    |
| cg00350003 | KCNJ12  | chr17 | 0.76253104  | + T2D risk | 5'UTR   |
| cg20742366 | KREMEN1 | chr22 | 0.762546893 | - T2D risk | TSS200  |
| cg05657651 | RHOA    | chr3  | 0.762703975 | - T2D risk | Body    |
| cg00121339 | CLEC16A | chr16 | 0.762818654 | - T2D risk | Body    |
| cg25579477 | PRKAG2  | chr7  | 0.762825429 | - T2D risk | 5'UTR   |
| cg25579477 | PRKAG2  | chr7  | 0.762825429 | - T2D risk | Body    |
| cg22035501 | APC     | chr5  | 0.762843774 | + T2D risk | 5'UTR   |



|            |          |       |             |            |         |
|------------|----------|-------|-------------|------------|---------|
| cg22035501 | APC      | chr5  | 0.762843774 | + T2D risk | TSS200  |
| cg01156249 | MGRN1    | chr16 | 0.762866098 | + T2D risk | Body    |
| cg11767956 | SUB1     | chr5  | 0.762934135 | - T2D risk | 5'UTR   |
| cg14701415 | PLAGL1   | chr6  | 0.763226675 | + T2D risk | 5'UTR   |
| cg15469966 | CHFR     | chr12 | 0.763264869 | + T2D risk | 3'UTR   |
| cg24921901 | PKD1     | chr2  | 0.763267248 | + T2D risk | Body    |
| cg01886077 | TMEM131  | chr2  | 0.763270969 | - T2D risk | TSS200  |
| cg19118263 | CADM1    | chr11 | 0.763301127 | - T2D risk | Body    |
| cg01058360 | PRKAG2   | chr7  | 0.763400346 | - T2D risk | Body    |
| cg03690869 | PRKCE    | chr2  | 0.763439422 | + T2D risk | 3'UTR   |
| cg15736847 | ATP6V1A  | chr3  | 0.76348457  | + T2D risk | 5'UTR   |
| cg26502194 | SLIT3    | chr5  | 0.763894929 | - T2D risk | Body    |
| cg04759187 | DIP2C    | chr10 | 0.763994929 | + T2D risk | Body    |
| cg11718965 | PRKAG2   | chr7  | 0.764085857 | + T2D risk | 5'UTR   |
| cg11718965 | PRKAG2   | chr7  | 0.764085857 | + T2D risk | Body    |
| cg19679501 | RANBP17  | chr5  | 0.76409391  | + T2D risk | Body    |
| cg20007890 | DIP2C    | chr10 | 0.764274312 | + T2D risk | Body    |
| cg06583696 | ASXL2    | chr2  | 0.764516411 | + T2D risk | TSS1500 |
| cg16058275 | NCOR1    | chr17 | 0.764658246 | - T2D risk | ExonBnd |
| cg16058275 | NCOR1    | chr17 | 0.764658246 | - T2D risk | Body    |
| cg18239858 | CUX1     | chr7  | 0.764846803 | - T2D risk | Body    |
| cg18343862 | LYVE1    | chr11 | 0.764924553 | + T2D risk | 1stExon |
| cg20780811 | RANBP17  | chr5  | 0.765035214 | - T2D risk | 1stExon |
| cg20780811 | RANBP17  | chr5  | 0.765035214 | - T2D risk | 5'UTR   |
| cg00807462 | CUX2     | chr12 | 0.765255828 | - T2D risk | Body    |
| cg24808531 | ADCY5    | chr3  | 0.765268798 | - T2D risk | Body    |
| cg12541935 | PRKAG2   | chr7  | 0.765323043 | + T2D risk | Body    |
| cg21321273 | PFKFB2   | chr1  | 0.765419654 | + T2D risk | Body    |
| cg05734675 | DIP2C    | chr10 | 0.765470914 | + T2D risk | Body    |
| cg12099188 | RSF1     | chr11 | 0.765524305 | + T2D risk | Body    |
| cg02965699 | PHF21A   | chr11 | 0.765550737 | + T2D risk | 5'UTR   |
| cg09307468 | PLAGL1   | chr6  | 0.765591415 | - T2D risk | TSS1500 |
| cg15092213 | GNA12    | chr7  | 0.76559751  | - T2D risk | Body    |
| cg01140522 | RANBP17  | chr5  | 0.765700773 | - T2D risk | Body    |
| cg20284631 | SKAP1    | chr17 | 0.765732892 | + T2D risk | Body    |
| cg11911769 | CUX1     | chr7  | 0.765764184 | + T2D risk | Body    |
| cg24996883 | ITPKB    | chr1  | 0.765905605 | + T2D risk | 3'UTR   |
| cg27656899 | TSGA10   | chr2  | 0.765969267 | + T2D risk | 5'UTR   |
| cg23454427 | CLIC5    | chr6  | 0.765971641 | + T2D risk | Body    |
| cg02863817 | ROBO2    | chr3  | 0.766060793 | + T2D risk | 5'UTR   |
| cg02863817 | ROBO2    | chr3  | 0.766060793 | + T2D risk | Body    |
| cg09900371 | DLL4     | chr15 | 0.766224607 | - T2D risk | Body    |
| cg09169839 | FARSB    | chr2  | 0.766312263 | - T2D risk | TSS1500 |
| cg17912513 | UXS1     | chr2  | 0.766347879 | + T2D risk | TSS1500 |
| cg24995915 | ATP8A1   | chr4  | 0.766423133 | - T2D risk | TSS1500 |
| cg00285941 | UNC80    | chr2  | 0.766553399 | + T2D risk | Body    |
| cg17597125 | NCOA7    | chr6  | 0.766749744 | + T2D risk | 5'UTR   |
| cg17597125 | NCOA7    | chr6  | 0.766749744 | + T2D risk | Body    |
| cg19465850 | CMTR1    | chr6  | 0.766792778 | - T2D risk | ExonBnd |
| cg19465850 | CMTR1    | chr6  | 0.766792778 | - T2D risk | Body    |
| cg01264131 | PDE7A    | chr8  | 0.766891728 | - T2D risk | Body    |
| cg14275273 | CLIC5    | chr6  | 0.767216762 | - T2D risk | TSS1500 |
| cg14275273 | CLIC5    | chr6  | 0.767216762 | - T2D risk | Body    |
| cg14480088 | RRAGB    | chrX  | 0.767220875 | - T2D risk | Body    |
| cg23724029 | RAP1GAP2 | chr17 | 0.767266169 | + T2D risk | Body    |
| cg07217345 | ZHX2     | chr8  | 0.767371853 | - T2D risk | 5'UTR   |
| cg06332620 | SSBP2    | chr5  | 0.767623612 | - T2D risk | Body    |
| cg17826107 | EVI5     | chr1  | 0.767670527 | + T2D risk | 3'UTR   |
| cg16600298 | CADM1    | chr11 | 0.767704212 | - T2D risk | Body    |
| cg25488288 | DIP2C    | chr10 | 0.767713582 | - T2D risk | 1stExon |
| cg05505746 | ENAH     | chr1  | 0.767720306 | + T2D risk | Body    |
| cg06117365 | GLA      | chrX  | 0.767733978 | - T2D risk | Body    |
| cg10715460 | KCNJ12   | chr17 | 0.767814599 | - T2D risk | TSS1500 |
| cg21581088 | SEZ6L    | chr22 | 0.767822553 | + T2D risk | Body    |
| cg22707073 | PPP1R12A | chr12 | 0.768169757 | - T2D risk | Body    |
| cg25840925 | SUB1     | chr5  | 0.768256122 | + T2D risk | Body    |
| cg22523443 | PDLIM5   | chr4  | 0.768290267 | + T2D risk | 5'UTR   |
| cg22523443 | PDLIM5   | chr4  | 0.768290267 | + T2D risk | Body    |
| cg13036037 | DIP2C    | chr10 | 0.7683702   | + T2D risk | Body    |
| cg00465739 | ATP8A2   | chr13 | 0.768534833 | + T2D risk | Body    |



|            |         |       |             |            |         |
|------------|---------|-------|-------------|------------|---------|
| cg22715945 | IFT74   | chr9  | 0.768586808 | - T2D risk | 5'UTR   |
| cg21153758 | ITGA1   | chr5  | 0.768637457 | - T2D risk | TSS200  |
| cg19065582 | SLIT3   | chr5  | 0.76873316  | - T2D risk | Body    |
| cg12305178 | CLEC16A | chr16 | 0.768738295 | + T2D risk | Body    |
| cg05997059 | MET     | chr7  | 0.76905954  | - T2D risk | Body    |
| cg17927924 | CLEC16A | chr16 | 0.769063585 | + T2D risk | Body    |
| cg02429283 | ULK4    | chr3  | 0.769428401 | - T2D risk | Body    |
| cg21571423 | ASH1L   | chr1  | 0.769471573 | + T2D risk | 5'UTR   |
| cg27335999 | DIP2C   | chr10 | 0.76964745  | + T2D risk | Body    |
| cg11227576 | NGLY1   | chr3  | 0.76968093  | - T2D risk | Body    |
| cg11227576 | NGLY1   | chr3  | 0.76968093  | - T2D risk | TSS200  |
| cg25408758 | PRKD1   | chr14 | 0.769726486 | - T2D risk | Body    |
| cg27324826 | NOL4    | chr18 | 0.769838654 | + T2D risk | Body    |
| cg22507969 | CNTNAP2 | chr7  | 0.769864443 | - T2D risk | Body    |
| cg03635073 | PRMT3   | chr11 | 0.769894058 | + T2D risk | Body    |
| cg22500559 | RHBDD1  | chr2  | 0.769973089 | - T2D risk | Body    |
| cg23850317 | ANKHD1  | chr5  | 0.770090277 | + T2D risk | Body    |
| cg14681854 | EVI5    | chr1  | 0.770106547 | + T2D risk | Body    |
| cg11308394 | RET     | chr10 | 0.770135945 | + T2D risk | Body    |
| cg09284511 | SLIT3   | chr5  | 0.770147531 | + T2D risk | Body    |
| cg26553180 | CUX1    | chr7  | 0.770169763 | + T2D risk | Body    |
| cg25630384 | MAN1A1  | chr6  | 0.770215401 | - T2D risk | Body    |
| cg21456025 | PDE5A   | chr4  | 0.77023798  | - T2D risk | 5'UTR   |
| cg21456025 | PDE5A   | chr4  | 0.77023798  | - T2D risk | TSS1500 |
| cg21456025 | PDE5A   | chr4  | 0.77023798  | - T2D risk | Body    |
| cg01662869 | MGRN1   | chr16 | 0.770378673 | - T2D risk | Body    |
| cg18381882 | RNF217  | chr6  | 0.770381398 | + T2D risk | Body    |
| cg18381882 | RNF217  | chr6  | 0.770381398 | + T2D risk | 5'UTR   |
| cg12355773 | WIZ     | chr19 | 0.77039548  | + T2D risk | Body    |
| cg03758484 | PDK1    | chr2  | 0.770459026 | - T2D risk | Body    |
| cg15604082 | GRK5    | chr10 | 0.770557729 | + T2D risk | Body    |
| cg16420089 | MGRN1   | chr16 | 0.770783518 | - T2D risk | Body    |
| cg16420089 | MGRN1   | chr16 | 0.770783518 | - T2D risk | 3'UTR   |
| cg17274605 | ARL15   | chr5  | 0.770785849 | - T2D risk | Body    |
| cg05971496 | COL4A1  | chr13 | 0.770985829 | + T2D risk | Body    |
| cg09248482 | ATRNL1  | chr10 | 0.771022558 | - T2D risk | 1stExon |
| cg09248482 | ATRNL1  | chr10 | 0.771022558 | - T2D risk | 5'UTR   |
| cg19095567 | CNTROB  | chr17 | 0.771024527 | - T2D risk | TSS1500 |
| cg04106334 | WDR47   | chr1  | 0.771315348 | - T2D risk | 5'UTR   |
| cg18157012 | SLIT3   | chr5  | 0.771418664 | + T2D risk | Body    |
| cg09178514 | NUCB2   | chr11 | 0.771448774 | - T2D risk | TSS200  |
| cg09773756 | MMS19   | chr10 | 0.771723645 | + T2D risk | TSS1500 |
| cg10075191 | ATP6V1A | chr3  | 0.771838376 | + T2D risk | 5'UTR   |
| cg05570946 | LAMA4   | chr6  | 0.771866157 | + T2D risk | Body    |
| cg22291695 | PDE3A   | chr12 | 0.771997187 | - T2D risk | Body    |
| cg19959519 | NF1     | chr17 | 0.772099876 | - T2D risk | Body    |
| cg16354253 | TSHZ1   | chr18 | 0.772170431 | + T2D risk | 5'UTR   |
| cg18374755 | PACS2   | chr14 | 0.772401176 | - T2D risk | Body    |
| cg23967480 | CLEC16A | chr16 | 0.772680114 | + T2D risk | Body    |
| cg15659828 | CHID1   | chr11 | 0.772883693 | + T2D risk | TSS1500 |
| cg15659828 | CHID1   | chr11 | 0.772883693 | + T2D risk | 5'UTR   |
| cg06701500 | YWHAQ   | chr2  | 0.772949197 | - T2D risk | TSS1500 |
| cg16125762 | STX6    | chr1  | 0.773082273 | - T2D risk | TSS200  |
| cg13874317 | TBC1D5  | chr3  | 0.773102365 | - T2D risk | 5'UTR   |
| cg00040103 | PRKCE   | chr2  | 0.773154933 | - T2D risk | Body    |
| cg03366425 | LAMA4   | chr6  | 0.77335223  | - T2D risk | Body    |
| cg22900813 | TMEM59  | chr1  | 0.773377282 | - T2D risk | 5'UTR   |
| cg22900813 | TMEM59  | chr1  | 0.773377282 | - T2D risk | ExonBnd |
| cg22900813 | TMEM59  | chr1  | 0.773377282 | - T2D risk | Body    |
| cg13899381 | CLIC5   | chr6  | 0.773405499 | + T2D risk | Body    |
| cg09787381 | CALD1   | chr7  | 0.773406286 | - T2D risk | Body    |
| cg04044694 | GLA     | chrX  | 0.77354565  | + T2D risk | 1stExon |
| cg04044694 | GLA     | chrX  | 0.77354565  | + T2D risk | 5'UTR   |
| cg15419054 | NPEPPS  | chr17 | 0.773642074 | + T2D risk | Body    |
| cg15179704 | WDR48   | chr3  | 0.77366139  | - T2D risk | Body    |
| cg14403974 | TMEM131 | chr2  | 0.773686526 | - T2D risk | Body    |
| cg23807124 | PACRG   | chr6  | 0.773721003 | + T2D risk | Body    |
| cg11532229 | NOL4    | chr18 | 0.773871248 | - T2D risk | TSS1500 |
| cg11532229 | NOL4    | chr18 | 0.773871248 | - T2D risk | Body    |
| cg22021597 | ITPKB   | chr1  | 0.773951171 | + T2D risk | Body    |



|            |                 |       |             |            |         |
|------------|-----------------|-------|-------------|------------|---------|
| cg00214688 | <i>ITGB1</i>    | chr10 | 0.77398136  | - T2D risk | Body    |
| cg00336267 | <i>TENM2</i>    | chr5  | 0.774220686 | - T2D risk | Body    |
| cg00223569 | <i>BCAT1</i>    | chr12 | 0.774253441 | - T2D risk | Body    |
| cg15199040 | <i>ERC2</i>     | chr3  | 0.774304096 | + T2D risk | Body    |
| cg13874012 | <i>DIP2C</i>    | chr10 | 0.774556714 | + T2D risk | Body    |
| cg03794630 | <i>ANK3</i>     | chr10 | 0.774647876 | - T2D risk | Body    |
| cg01233968 | <i>DIP2C</i>    | chr10 | 0.774696817 | - T2D risk | Body    |
| cg19752649 | <i>CLEC16A</i>  | chr16 | 0.774737779 | - T2D risk | Body    |
| cg05199331 | <i>RAP1GAP2</i> | chr17 | 0.774798197 | + T2D risk | Body    |
| cg25636218 | <i>ACTN4</i>    | chr19 | 0.774861161 | + T2D risk | Body    |
| cg14465560 | <i>ULK4</i>     | chr3  | 0.774865375 | + T2D risk | Body    |
| cg17050472 | <i>GRK5</i>     | chr10 | 0.774886422 | - T2D risk | Body    |
| cg00930755 | <i>TENM2</i>    | chr5  | 0.775055834 | - T2D risk | Body    |
| cg06258196 | <i>CUX1</i>     | chr7  | 0.775113103 | - T2D risk | Body    |
| cg25005894 | <i>ERC2</i>     | chr3  | 0.775160884 | + T2D risk | 5'UTR   |
| cg02271488 | <i>MAST1</i>    | chr19 | 0.775186568 | + T2D risk | TSS1500 |
| cg01340163 | <i>KDR</i>      | chr4  | 0.775227445 | + T2D risk | Body    |
| cg15469944 | <i>DNAH9</i>    | chr17 | 0.775297562 | - T2D risk | TSS1500 |
| cg15469944 | <i>DNAH9</i>    | chr17 | 0.775297562 | - T2D risk | Body    |
| cg21513735 | <i>FNIP2</i>    | chr4  | 0.77531691  | - T2D risk | Body    |
| cg21195543 | <i>EV15</i>     | chr1  | 0.775384123 | - T2D risk | Body    |
| cg19600449 | <i>PRKCE</i>    | chr2  | 0.775388455 | + T2D risk | Body    |
| cg04546691 | <i>ROBO2</i>    | chr3  | 0.775420937 | - T2D risk | Body    |
| cg16872172 | <i>RHOA</i>     | chr3  | 0.775498436 | + T2D risk | TSS200  |
| cg12882103 | <i>MAN1A1</i>   | chr6  | 0.775511612 | - T2D risk | TSS1500 |
| cg00524169 | <i>ACTN4</i>    | chr19 | 0.775519727 | - T2D risk | TSS1500 |
| cg01124961 | <i>HMBX1</i>    | chr8  | 0.775593797 | - T2D risk | TSS1500 |
| cg05801992 | <i>MET</i>      | chr7  | 0.775599457 | + T2D risk | TSS1500 |
| cg25936055 | <i>DNAH9</i>    | chr17 | 0.775617299 | + T2D risk | Body    |
| cg23584869 | <i>SRPK2</i>    | chr7  | 0.775735585 | + T2D risk | Body    |
| cg05213267 | <i>DIP2C</i>    | chr10 | 0.775844239 | - T2D risk | Body    |
| cg15148792 | <i>PFKFB2</i>   | chr1  | 0.775913334 | - T2D risk | Body    |
| cg16148959 | <i>NF1</i>      | chr17 | 0.776032446 | + T2D risk | Body    |
| cg01089544 | <i>APBA1</i>    | chr9  | 0.77603438  | - T2D risk | Body    |
| cg11059932 | <i>ITPKB</i>    | chr1  | 0.77608507  | + T2D risk | Body    |
| cg24272514 | <i>ATXN1</i>    | chr6  | 0.776120067 | - T2D risk | 5'UTR   |
| cg24278191 | <i>NCOR1</i>    | chr17 | 0.776121354 | - T2D risk | Body    |
| cg20665002 | <i>ATP8A2</i>   | chr13 | 0.776142165 | - T2D risk | 1stExon |
| cg20665002 | <i>ATP8A2</i>   | chr13 | 0.776142165 | - T2D risk | 5'UTR   |
| cg22915752 | <i>NF1</i>      | chr17 | 0.77624596  | + T2D risk | Body    |
| cg26814569 | <i>CUX2</i>     | chr12 | 0.776352964 | + T2D risk | Body    |
| cg10506098 | <i>TJP1</i>     | chr15 | 0.776402739 | - T2D risk | Body    |
| cg05814156 | <i>PTPRU</i>    | chr1  | 0.776424293 | - T2D risk | ExonBnd |
| cg05814156 | <i>PTPRU</i>    | chr1  | 0.776424293 | - T2D risk | Body    |
| cg14058739 | <i>ANK3</i>     | chr10 | 0.776510739 | - T2D risk | TSS1500 |
| cg14058739 | <i>ANK3</i>     | chr10 | 0.776510739 | - T2D risk | Body    |
| cg14479754 | <i>AGPAT3</i>   | chr21 | 0.776664435 | - T2D risk | 5'UTR   |
| cg27425452 | <i>PACRG</i>    | chr6  | 0.776700702 | + T2D risk | TSS200  |
| cg27425452 | <i>PACRG</i>    | chr6  | 0.776700702 | + T2D risk | 5'UTR   |
| cg16967191 | <i>CPLX2</i>    | chr5  | 0.776863067 | - T2D risk | 5'UTR   |
| cg03396323 | <i>ATP8A1</i>   | chr4  | 0.776873892 | - T2D risk | Body    |
| cg11428294 | <i>SGSM2</i>    | chr17 | 0.777326693 | + T2D risk | Body    |
| cg02098482 | <i>GNA12</i>    | chr7  | 0.777449818 | + T2D risk | Body    |
| cg10835308 | <i>MDM1</i>     | chr12 | 0.777717103 | + T2D risk | 5'UTR   |
| cg10835308 | <i>MDM1</i>     | chr12 | 0.777717103 | + T2D risk | 1stExon |
| cg07212009 | <i>DIP2C</i>    | chr10 | 0.777723678 | + T2D risk | Body    |
| cg00686616 | <i>ATRNL1</i>   | chr10 | 0.778111109 | - T2D risk | Body    |
| cg23463077 | <i>ANKHD1</i>   | chr5  | 0.778198607 | - T2D risk | TSS200  |
| cg07447346 | <i>GRK5</i>     | chr10 | 0.778252556 | - T2D risk | Body    |
| cg06826552 | <i>APBA1</i>    | chr9  | 0.778348994 | + T2D risk | Body    |
| cg27376589 | <i>PRKAG2</i>   | chr7  | 0.77835837  | - T2D risk | Body    |
| cg22052583 | <i>MAN1A1</i>   | chr6  | 0.778505103 | + T2D risk | Body    |
| cg20309646 | <i>SSBP2</i>    | chr5  | 0.778636427 | - T2D risk | 1stExon |
| cg07739042 | <i>PACS1</i>    | chr11 | 0.778660962 | - T2D risk | Body    |
| cg03209733 | <i>LMX1B</i>    | chr9  | 0.778756142 | + T2D risk | Body    |
| cg14072016 | <i>DIP2C</i>    | chr10 | 0.778810122 | - T2D risk | Body    |
| cg27475442 | <i>RAP1GAP2</i> | chr17 | 0.778821199 | - T2D risk | Body    |
| cg14717988 | <i>BCAT1</i>    | chr12 | 0.778900523 | + T2D risk | Body    |
| cg14717988 | <i>BCAT1</i>    | chr12 | 0.778900523 | + T2D risk | TSS200  |
| cg14619203 | <i>PHACTR1</i>  | chr6  | 0.778915607 | - T2D risk | Body    |



|            |          |       |             |            |         |
|------------|----------|-------|-------------|------------|---------|
| cg13055636 | ENAH     | chr1  | 0.779014672 | - T2D risk | 3'UTR   |
| cg11155638 | PFKFB2   | chr1  | 0.779040682 | + T2D risk | TSS1500 |
| cg04663956 | NF1      | chr17 | 0.779104118 | - T2D risk | Body    |
| cg27507371 | ARHGAP32 | chr11 | 0.779193812 | + T2D risk | 5'UTR   |
| cg27507371 | ARHGAP32 | chr11 | 0.779193812 | + T2D risk | Body    |
| cg00602862 | CADM1    | chr11 | 0.77920545  | - T2D risk | Body    |
| cg14530655 | FLT1     | chr13 | 0.779300709 | - T2D risk | Body    |
| cg27295594 | SNX4     | chr3  | 0.779400842 | + T2D risk | TSS1500 |
| cg13486309 | ASH1L    | chr1  | 0.779444559 | - T2D risk | Body    |
| cg24290274 | RSF1     | chr11 | 0.77945369  | - T2D risk | Body    |
| cg14175593 | MMS19    | chr10 | 0.779682062 | - T2D risk | Body    |
| cg03524264 | NGF      | chr1  | 0.779826264 | - T2D risk | 5'UTR   |
| cg12813441 | RTN4     | chr2  | 0.779897301 | + T2D risk | Body    |
| cg07895504 | CDH22    | chr20 | 0.779915491 | - T2D risk | Body    |
| cg12782306 | ANK2     | chr4  | 0.779965216 | - T2D risk | Body    |
| cg10153341 | MAN1A1   | chr6  | 0.780045517 | - T2D risk | Body    |
| cg00725690 | GLG1     | chr16 | 0.780369189 | + T2D risk | Body    |
| cg03405336 | IMPA1    | chr8  | 0.780408299 | + T2D risk | TSS1500 |
| cg07796563 | CHFR     | chr12 | 0.780413124 | - T2D risk | Body    |
| cg13416461 | DIP2C    | chr10 | 0.780429162 | - T2D risk | Body    |
| cg13385437 | DIP2C    | chr10 | 0.780496402 | + T2D risk | Body    |
| cg01739683 | MGRN1    | chr16 | 0.780505803 | - T2D risk | Body    |
| cg07439664 | ERC2     | chr3  | 0.780522429 | + T2D risk | Body    |
| cg11523366 | GNA12    | chr7  | 0.780615497 | + T2D risk | Body    |
| cg24975638 | CUX1     | chr7  | 0.780756596 | - T2D risk | Body    |
| cg12427348 | ATP4A    | chr19 | 0.780762216 | - T2D risk | Body    |
| cg17788054 | FAM160A1 | chr4  | 0.780802196 | + T2D risk | Body    |
| cg06995190 | CUX1     | chr7  | 0.780821692 | - T2D risk | Body    |
| cg01845051 | ULK4     | chr3  | 0.781610767 | + T2D risk | Body    |
| cg27560690 | FBXO11   | chr2  | 0.78184768  | + T2D risk | 5'UTR   |
| cg22923080 | SPOCK1   | chr5  | 0.781887961 | - T2D risk | Body    |
| cg13579562 | DLL4     | chr15 | 0.781911365 | - T2D risk | TSS200  |
| cg18505908 | APBA1    | chr9  | 0.782044043 | - T2D risk | 1stExon |
| cg18505908 | APBA1    | chr9  | 0.782044043 | - T2D risk | 5'UTR   |
| cg04858829 | SSBP2    | chr5  | 0.782255291 | + T2D risk | Body    |
| cg09742688 | GAD1     | chr2  | 0.782297251 | - T2D risk | TSS1500 |
| cg07795407 | MEIS2    | chr15 | 0.782336959 | + T2D risk | 5'UTR   |
| cg07795407 | MEIS2    | chr15 | 0.782336959 | + T2D risk | 1stExon |
| cg07795407 | MEIS2    | chr15 | 0.782336959 | + T2D risk | Body    |
| cg07795407 | MEIS2    | chr15 | 0.782336959 | + T2D risk | TSS1500 |
| cg19059964 | JPH2     | chr20 | 0.782595234 | + T2D risk | Body    |
| cg24145613 | PACRG    | chr6  | 0.782780447 | + T2D risk | Body    |
| cg25936818 | ZRANB1   | chr10 | 0.783353347 | - T2D risk | 5'UTR   |
| cg25936818 | ZRANB1   | chr10 | 0.783353347 | - T2D risk | 1stExon |
| cg26127391 | KIAA1109 | chr4  | 0.783439129 | + T2D risk | Body    |
| cg04200137 | CLOCK    | chr4  | 0.783573632 | - T2D risk | 5'UTR   |
| cg09809224 | ULK4     | chr3  | 0.783622684 | - T2D risk | Body    |
| cg12990219 | TBC1D5   | chr3  | 0.783625157 | - T2D risk | 5'UTR   |
| cg06816102 | PHACTR1  | chr6  | 0.783673082 | - T2D risk | Body    |
| cg03293107 | WWP2     | chr16 | 0.783695663 | - T2D risk | Body    |
| cg01928968 | CNTNAP2  | chr7  | 0.783704731 | + T2D risk | Body    |
| cg26605447 | ITGA1    | chr5  | 0.7837448   | + T2D risk | Body    |
| cg05948029 | DDC      | chr7  | 0.783749802 | - T2D risk | Body    |
| cg15873372 | SCARB2   | chr4  | 0.783760756 | + T2D risk | Body    |
| cg17288126 | ERC2     | chr3  | 0.783886033 | + T2D risk | Body    |
| cg22925803 | SKAP1    | chr17 | 0.783997434 | - T2D risk | Body    |
| cg23626895 | CEP126   | chr11 | 0.78402719  | - T2D risk | Body    |
| cg14438609 | PRKD1    | chr14 | 0.784069603 | - T2D risk | Body    |
| cg13913742 | BCAT1    | chr12 | 0.784448638 | + T2D risk | 5'UTR   |
| cg13913742 | BCAT1    | chr12 | 0.784448638 | + T2D risk | 1stExon |
| cg10418570 | TMEM150C | chr4  | 0.784503405 | - T2D risk | 5'UTR   |
| cg19641557 | CTR9     | chr11 | 0.784728106 | - T2D risk | Body    |
| cg15401013 | MYO6     | chr6  | 0.784836165 | + T2D risk | Body    |
| cg15401013 | MYO6     | chr6  | 0.784836165 | + T2D risk | ExonBnd |
| cg06090569 | UBE2K    | chr4  | 0.784996322 | + T2D risk | Body    |
| cg08979633 | WDR48    | chr3  | 0.785119539 | + T2D risk | Body    |
| cg02535735 | TSC22D1  | chr13 | 0.785197855 | - T2D risk | Body    |
| cg18875435 | NOTCH3   | chr19 | 0.785298084 | - T2D risk | 3'UTR   |
| cg10603140 | RHBDD1   | chr2  | 0.785330921 | + T2D risk | Body    |
| cg25375656 | DACH1    | chr13 | 0.785370008 | - T2D risk | Body    |



|            |          |       |             |            |         |
|------------|----------|-------|-------------|------------|---------|
| cg20667782 | ASXL2    | chr2  | 0.785372694 | + T2D risk | TSS200  |
| cg01829024 | TMEM150C | chr4  | 0.785423984 | - T2D risk | 5'UTR   |
| cg17816847 | ATXN1    | chr6  | 0.785435955 | + T2D risk | 5'UTR   |
| cg10941174 | CNTNAP2  | chr7  | 0.785566377 | + T2D risk | Body    |
| cg13259415 | SKAP1    | chr17 | 0.785785483 | - T2D risk | Body    |
| cg15986644 | DIP2C    | chr10 | 0.785827114 | + T2D risk | Body    |
| cg11521427 | ANK2     | chr4  | 0.786104381 | - T2D risk | TSS200  |
| cg11521427 | ANK2     | chr4  | 0.786104381 | - T2D risk | Body    |
| cg10472149 | DNAH9    | chr17 | 0.786247976 | - T2D risk | Body    |
| cg09543140 | CUX1     | chr7  | 0.786304305 | + T2D risk | Body    |
| cg13925527 | TTC28    | chr22 | 0.786361024 | + T2D risk | Body    |
| cg16669228 | ROBO2    | chr3  | 0.78639859  | - T2D risk | Body    |
| cg27366532 | CREBBP   | chr16 | 0.78645734  | - T2D risk | Body    |
| cg10925871 | PCYT1A   | chr3  | 0.786508115 | - T2D risk | Body    |
| cg23329769 | RBM4     | chr11 | 0.78665277  | - T2D risk | TSS200  |
| cg00643662 | CRYL1    | chr13 | 0.786682662 | + T2D risk | Body    |
| cg26901873 | HMBOX1   | chr8  | 0.787019283 | + T2D risk | 5'UTR   |
| cg02923106 | DIP2C    | chr10 | 0.787093947 | + T2D risk | Body    |
| cg05186902 | PDK1     | chr2  | 0.787107842 | - T2D risk | TSS1500 |
| cg05186902 | PDK1     | chr2  | 0.787107842 | - T2D risk | Body    |
| cg21019326 | KCNJ18   | chr17 | 0.787385585 | + T2D risk | TSS1500 |
| cg21019326 | KCNJ12   | chr17 | 0.787385585 | + T2D risk | 5'UTR   |
| cg01607441 | ATP4A    | chr19 | 0.787403108 | + T2D risk | TSS200  |
| cg16151136 | CUX1     | chr7  | 0.787434525 | - T2D risk | Body    |
| cg20917814 | TANC2    | chr17 | 0.787495079 | + T2D risk | 3'UTR   |
| cg17900661 | CADM1    | chr11 | 0.787526059 | - T2D risk | Body    |
| cg08099115 | ERC2     | chr3  | 0.787567244 | + T2D risk | 3'UTR   |
| cg21022776 | RAP1GAP2 | chr17 | 0.787702037 | + T2D risk | Body    |
| cg13584095 | CDH22    | chr20 | 0.787742038 | - T2D risk | Body    |
| cg13442200 | SCARB2   | chr4  | 0.787743593 | - T2D risk | 3'UTR   |
| cg22100409 | PDLIM5   | chr4  | 0.787873001 | + T2D risk | 5'UTR   |
| cg22100409 | PDLIM5   | chr4  | 0.787873001 | + T2D risk | Body    |
| cg19438261 | IMPA1    | chr8  | 0.787943709 | - T2D risk | TSS1500 |
| cg04845995 | TTC28    | chr22 | 0.788045355 | + T2D risk | Body    |
| cg13266323 | CADM1    | chr11 | 0.788318482 | + T2D risk | Body    |
| cg03387066 | KCNIP3   | chr2  | 0.788322375 | + T2D risk | Body    |
| cg03387066 | KCNIP3   | chr2  | 0.788322375 | + T2D risk | TSS1500 |
| cg08721910 | ASH1L    | chr1  | 0.788330549 | - T2D risk | Body    |
| cg02773403 | ANK3     | chr10 | 0.788388959 | - T2D risk | Body    |
| cg22844183 | SEC31A   | chr4  | 0.788412563 | + T2D risk | Body    |
| cg26997736 | PDE5A    | chr4  | 0.788422743 | - T2D risk | Body    |
| cg26997736 | PDE5A    | chr4  | 0.788422743 | - T2D risk | TSS200  |
| cg26997736 | PDE5A    | chr4  | 0.788422743 | - T2D risk | TSS1500 |
| cg27567953 | WDR47    | chr1  | 0.788593461 | - T2D risk | Body    |
| cg13466456 | PTPRU    | chr1  | 0.788595272 | - T2D risk | Body    |
| cg18098433 | CADM1    | chr11 | 0.788659505 | - T2D risk | Body    |
| cg06438577 | PACS2    | chr14 | 0.78874303  | - T2D risk | Body    |
| cg16285635 | PHF21A   | chr11 | 0.788800836 | + T2D risk | Body    |
| cg19551485 | ERC2     | chr3  | 0.788806536 | - T2D risk | 3'UTR   |
| cg18041893 | SRPK2    | chr7  | 0.788881394 | + T2D risk | Body    |
| cg10677712 | NGLY1    | chr3  | 0.788952522 | - T2D risk | Body    |
| cg25626273 | CUX2     | chr12 | 0.789046824 | - T2D risk | Body    |
| cg18177533 | KDR      | chr4  | 0.789109946 | + T2D risk | TSS200  |
| cg22976533 | PACS2    | chr14 | 0.789132325 | - T2D risk | Body    |
| cg11422351 | PRKAG2   | chr7  | 0.789211453 | - T2D risk | Body    |
| cg16994041 | PRKAG2   | chr7  | 0.789339289 | - T2D risk | 5'UTR   |
| cg16994041 | PRKAG2   | chr7  | 0.789339289 | - T2D risk | Body    |
| cg03034180 | PACRG    | chr6  | 0.789371422 | + T2D risk | Body    |
| cg12047375 | ATP6V1H  | chr8  | 0.789446165 | + T2D risk | TSS1500 |
| cg00314860 | FAM160A1 | chr4  | 0.789462934 | + T2D risk | Body    |
| cg25883405 | SRPK2    | chr7  | 0.789513187 | + T2D risk | Body    |
| cg09632131 | ZHX2     | chr8  | 0.789592074 | + T2D risk | 5'UTR   |
| cg20043627 | DIP2C    | chr10 | 0.789720864 | + T2D risk | Body    |
| cg27042667 | NUF2     | chr1  | 0.789744039 | - T2D risk | Body    |
| cg08934600 | APC      | chr5  | 0.78974981  | + T2D risk | TSS200  |
| cg15096563 | BCAT1    | chr12 | 0.789766062 | + T2D risk | Body    |
| cg15096563 | BCAT1    | chr12 | 0.789766062 | + T2D risk | TSS1500 |
| cg20651218 | DIP2C    | chr10 | 0.78980201  | + T2D risk | Body    |
| cg27055657 | NPAT     | chr11 | 0.789930145 | - T2D risk | Body    |
| cg08477668 | APC      | chr5  | 0.79000133  | - T2D risk | Body    |



|            |          |       |             |            |         |
|------------|----------|-------|-------------|------------|---------|
| cg08477668 | APC      | chr5  | 0.79000133  | - T2D risk | 5'UTR   |
| cg26915370 | CALD1    | chr7  | 0.790107275 | + T2D risk | Body    |
| cg26915370 | CALD1    | chr7  | 0.790107275 | + T2D risk | TSS1500 |
| cg17159629 | ARHGAP32 | chr11 | 0.790303034 | + T2D risk | Body    |
| cg16727916 | PRKAG2   | chr7  | 0.790319054 | - T2D risk | 5'UTR   |
| cg16727916 | PRKAG2   | chr7  | 0.790319054 | - T2D risk | 1stExon |
| cg11722581 | DIP2C    | chr10 | 0.790330875 | - T2D risk | Body    |
| cg21249921 | SSBP2    | chr5  | 0.790390253 | - T2D risk | TSS200  |
| cg15110127 | EFR3A    | chr8  | 0.790467191 | - T2D risk | TSS200  |
| cg24689460 | TOX3     | chr16 | 0.790534429 | + T2D risk | TSS1500 |
| cg07192717 | ACSS2    | chr20 | 0.790567358 | - T2D risk | TSS1500 |
| cg07192717 | ACSS2    | chr20 | 0.790567358 | - T2D risk | 5'UTR   |
| cg17057452 | ITPKB    | chr1  | 0.790661535 | + T2D risk | TSS200  |
| cg18869815 | ATP8A2   | chr13 | 0.790810636 | - T2D risk | Body    |
| cg22112443 | MEIS2    | chr15 | 0.790933215 | - T2D risk | TSS1500 |
| cg19217770 | APBA1    | chr9  | 0.791257473 | + T2D risk | Body    |
| cg15307839 | PLEKHG3  | chr14 | 0.791395197 | - T2D risk | 5'UTR   |
| cg04391547 | UNC80    | chr2  | 0.791481155 | - T2D risk | Body    |
| cg04288388 | ANK2     | chr4  | 0.791489253 | + T2D risk | ExonBnd |
| cg04288388 | ANK2     | chr4  | 0.791489253 | + T2D risk | Body    |
| cg08323260 | TSHZ1    | chr18 | 0.791888261 | - T2D risk | 5'UTR   |
| cg08323260 | TSHZ1    | chr18 | 0.791888261 | - T2D risk | Body    |
| cg12565580 | ATP8A2   | chr13 | 0.791896528 | + T2D risk | Body    |
| cg11674773 | TMEM59   | chr1  | 0.79189725  | - T2D risk | Body    |
| cg12167279 | ZDHHC2   | chr8  | 0.791924209 | + T2D risk | Body    |
| cg14532140 | GAD1     | chr2  | 0.792061478 | - T2D risk | TSS200  |
| cg10658277 | NOL4     | chr18 | 0.792218086 | + T2D risk | 5'UTR   |
| cg10658277 | NOL4     | chr18 | 0.792218086 | + T2D risk | Body    |
| cg09264632 | KIAA1109 | chr4  | 0.792234421 | + T2D risk | Body    |
| cg10081084 | ZHX2     | chr8  | 0.792340362 | - T2D risk | 5'UTR   |
| cg03583090 | CLEC16A  | chr16 | 0.79244673  | + T2D risk | Body    |
| cg26990380 | PDLIM5   | chr4  | 0.792446857 | + T2D risk | Body    |
| cg22518769 | SLC29A4  | chr7  | 0.792527367 | + T2D risk | TSS1500 |
| cg06748884 | CLEC16A  | chr16 | 0.792610727 | - T2D risk | Body    |
| cg08921926 | ARIH1    | chr15 | 0.792746986 | + T2D risk | TSS1500 |
| cg10005894 | ST6GAL1  | chr3  | 0.792810577 | - T2D risk | 5'UTR   |
| cg14024008 | JPH2     | chr20 | 0.792851873 | + T2D risk | Body    |
| cg14024008 | JPH2     | chr20 | 0.792851873 | + T2D risk | 3'UTR   |
| cg13550731 | DYNC1I2  | chr2  | 0.792872417 | + T2D risk | TSS200  |
| cg13908833 | SLIT3    | chr5  | 0.792890951 | + T2D risk | Body    |
| cg11589739 | ST20     | chr15 | 0.793065905 | + T2D risk | TSS1500 |
| cg25424029 | COL4A1   | chr13 | 0.793137582 | + T2D risk | Body    |
| cg17236519 | PTPRU    | chr1  | 0.793172351 | - T2D risk | Body    |
| cg16110711 | APC      | chr5  | 0.79341289  | - T2D risk | TSS1500 |
| cg18314695 | ATP4A    | chr19 | 0.793458438 | + T2D risk | TSS200  |
| cg05540662 | ATXN1    | chr6  | 0.793482856 | - T2D risk | 5'UTR   |
| cg07767497 | ATXN1    | chr6  | 0.793557997 | + T2D risk | 5'UTR   |
| cg09391705 | CDK8     | chr13 | 0.793678108 | + T2D risk | TSS200  |
| cg06746365 | PRKAG2   | chr7  | 0.793797824 | + T2D risk | Body    |
| cg20942198 | PCYT1A   | chr3  | 0.793852483 | - T2D risk | TSS200  |
| cg19589725 | SLIT3    | chr5  | 0.793867622 | + T2D risk | Body    |
| cg13580827 | APBA1    | chr9  | 0.793877935 | - T2D risk | Body    |
| cg01236137 | SUB1     | chr5  | 0.793960056 | - T2D risk | TSS200  |
| cg07180603 | SMG7     | chr1  | 0.794026709 | + T2D risk | TSS1500 |
| cg01471539 | POLA1    | chrX  | 0.794095016 | - T2D risk | Body    |
| cg01661235 | PRKCB    | chr16 | 0.794443911 | + T2D risk | Body    |
| cg12943330 | ADCY5    | chr3  | 0.794510306 | - T2D risk | Body    |
| cg11869193 | RAP1GAP2 | chr17 | 0.794523169 | + T2D risk | Body    |
| cg20175766 | LAMA4    | chr6  | 0.794533477 | + T2D risk | Body    |
| cg15348720 | PDE3A    | chr12 | 0.794572744 | - T2D risk | Body    |
| cg02399826 | SPOCK1   | chr5  | 0.79473928  | + T2D risk | Body    |
| cg19778647 | BCAT1    | chr12 | 0.794750672 | + T2D risk | Body    |
| cg10487201 | KIAA1217 | chr10 | 0.794792035 | - T2D risk | Body    |
| cg19471678 | WDR48    | chr3  | 0.794873784 | + T2D risk | 3'UTR   |
| cg25017402 | FNIP2    | chr4  | 0.794876401 | + T2D risk | Body    |
| cg26002272 | ANK2     | chr4  | 0.794891509 | - T2D risk | Body    |
| cg14141458 | RHOQ     | chr2  | 0.794912704 | + T2D risk | Body    |
| cg04014190 | CUX2     | chr12 | 0.794998387 | + T2D risk | Body    |
| cg20963443 | PRKCE    | chr2  | 0.795415337 | + T2D risk | Body    |
| cg16913972 | ZHX2     | chr8  | 0.7955792   | + T2D risk | 5'UTR   |



|            |          |       |             |            |         |
|------------|----------|-------|-------------|------------|---------|
| cg12241620 | CUX1     | chr7  | 0.795650078 | - T2D risk | Body    |
| cg12909060 | TSGA10   | chr2  | 0.79580765  | + T2D risk | TSS1500 |
| cg13870500 | PRKAG2   | chr7  | 0.795954987 | + T2D risk | Body    |
| cg15767067 | TENM2    | chr5  | 0.796057481 | + T2D risk | Body    |
| cg19756611 | DACH1    | chr13 | 0.796155132 | + T2D risk | TSS1500 |
| cg12917938 | CHFR     | chr12 | 0.796156836 | + T2D risk | Body    |
| cg11683889 | PPP1R12A | chr12 | 0.796356293 | - T2D risk | Body    |
| cg17367439 | BCAT1    | chr12 | 0.796399355 | + T2D risk | Body    |
| cg22521948 | ITPKB    | chr1  | 0.796426171 | + T2D risk | 5'UTR   |
| cg22521948 | ITPKB    | chr1  | 0.796426171 | + T2D risk | 1stExon |
| cg11660418 | UXS1     | chr2  | 0.796444323 | + T2D risk | Body    |
| cg06123346 | ATP4A    | chr19 | 0.796477936 | - T2D risk | 1stExon |
| cg00794813 | NGF      | chr1  | 0.796508462 | + T2D risk | Body    |
| cg15584954 | DIP2C    | chr10 | 0.796536714 | - T2D risk | Body    |
| cg14009688 | CALD1    | chr7  | 0.796645261 | - T2D risk | 1stExon |
| cg14009688 | CALD1    | chr7  | 0.796645261 | - T2D risk | 5'UTR   |
| cg23888240 | ARIH1    | chr15 | 0.796655032 | + T2D risk | TSS1500 |
| cg03868865 | DDC      | chr7  | 0.796695735 | + T2D risk | 5'UTR   |
| cg06748848 | SPAG9    | chr17 | 0.79681465  | - T2D risk | 1stExon |
| cg22272668 | CUL1     | chr7  | 0.796987831 | + T2D risk | Body    |
| cg11738976 | JPH2     | chr20 | 0.797002627 | - T2D risk | Body    |
| cg08701227 | DIP2C    | chr10 | 0.797050261 | + T2D risk | Body    |
| cg04339553 | MEIS2    | chr15 | 0.797056325 | + T2D risk | Body    |
| cg14037641 | SEZ6L    | chr22 | 0.797118871 | + T2D risk | Body    |
| cg12178385 | NQO1     | chr16 | 0.797149935 | - T2D risk | TSS1500 |
| cg22553626 | DNAH9    | chr17 | 0.797183526 | + T2D risk | Body    |
| cg17137015 | ULK4     | chr3  | 0.797425424 | - T2D risk | Body    |
| cg18997901 | MYO6     | chr6  | 0.79745539  | + T2D risk | 5'UTR   |
| cg15509764 | TBC1D5   | chr3  | 0.797528518 | - T2D risk | Body    |
| cg01814364 | NOTCH3   | chr19 | 0.797608501 | + T2D risk | Body    |
| cg17242222 | POC1B    | chr12 | 0.797719574 | + T2D risk | TSS1500 |
| cg25646679 | MGRN1    | chr16 | 0.797881294 | + T2D risk | Body    |
| cg06268179 | KREMEN1  | chr22 | 0.797890343 | - T2D risk | 3'UTR   |
| cg12773057 | ASXL2    | chr2  | 0.798164734 | - T2D risk | Body    |
| cg02220008 | PHACTR1  | chr6  | 0.798238205 | + T2D risk | Body    |
| cg09478243 | SLIT3    | chr5  | 0.798238356 | + T2D risk | Body    |
| cg18362489 | PHF21A   | chr11 | 0.798284848 | + T2D risk | TSS1500 |
| cg08142943 | MGRN1    | chr16 | 0.798344396 | + T2D risk | Body    |
| cg06913388 | SSB      | chr2  | 0.798401019 | + T2D risk | 5'UTR   |
| cg22927788 | PDE3A    | chr12 | 0.798417478 | - T2D risk | TSS1500 |
| cg27395391 | ATXN1    | chr6  | 0.798526237 | + T2D risk | 5'UTR   |
| cg07229130 | RHOQ     | chr2  | 0.798583361 | + T2D risk | Body    |
| cg20443501 | PLAGL1   | chr6  | 0.798737577 | - T2D risk | TSS1500 |
| cg20443501 | PLAGL1   | chr6  | 0.798737577 | - T2D risk | 5'UTR   |
| cg24112692 | ST8SIA1  | chr12 | 0.798741757 | + T2D risk | Body    |
| cg24711637 | NOL4     | chr18 | 0.798787644 | - T2D risk | TSS1500 |
| cg24711637 | NOL4     | chr18 | 0.798787644 | - T2D risk | Body    |
| cg17825298 | PRKAG2   | chr7  | 0.798975462 | + T2D risk | Body    |
| cg16435373 | SLC30A8  | chr8  | 0.798992945 | - T2D risk | TSS200  |
| cg16435373 | SLC30A8  | chr8  | 0.798992945 | - T2D risk | TSS1500 |
| cg16821724 | GLG1     | chr16 | 0.799018605 | + T2D risk | 3'UTR   |
| cg16821724 | GLG1     | chr16 | 0.799018605 | + T2D risk | Body    |
| cg14750616 | KIAA1217 | chr10 | 0.799199563 | - T2D risk | Body    |
| cg00118342 | UXS1     | chr2  | 0.799262737 | - T2D risk | Body    |
| cg27259110 | KIAA1217 | chr10 | 0.799302681 | - T2D risk | Body    |
| cg21012946 | ERC2     | chr3  | 0.799326515 | - T2D risk | Body    |
| cg04538770 | TENM2    | chr5  | 0.799349872 | - T2D risk | Body    |
| cg23989770 | ATP8A1   | chr4  | 0.799359117 | + T2D risk | Body    |
| cg23343458 | ITPKB    | chr1  | 0.79937618  | - T2D risk | TSS200  |
| cg00291192 | TBC1D5   | chr3  | 0.799411595 | + T2D risk | 5'UTR   |
| cg08860879 | GALK2    | chr15 | 0.799463382 | + T2D risk | Body    |
| cg08860879 | GALK2    | chr15 | 0.799463382 | + T2D risk | TSS1500 |
| cg18057497 | ANK3     | chr10 | 0.799499017 | - T2D risk | Body    |
| cg07077459 | PLAGL1   | chr6  | 0.799505928 | + T2D risk | 5'UTR   |
| cg17619145 | WWP2     | chr16 | 0.799624928 | + T2D risk | TSS1500 |
| cg17619145 | WWP2     | chr16 | 0.799624928 | + T2D risk | Body    |
| cg22521992 | ARIH1    | chr15 | 0.799701581 | + T2D risk | Body    |
| cg16063021 | ATP6V1H  | chr8  | 0.799907074 | + T2D risk | Body    |
| cg03139691 | ANK3     | chr10 | 0.800034941 | + T2D risk | TSS1500 |
| cg20560185 | FBXO11   | chr2  | 0.800207296 | + T2D risk | 3'UTR   |



|            |                 |       |             |            |         |
|------------|-----------------|-------|-------------|------------|---------|
| cg20560185 | <i>FBXO11</i>   | chr2  | 0.800207296 | + T2D risk | Body    |
| cg03810139 | <i>KREMEN1</i>  | chr22 | 0.800229336 | - T2D risk | Body    |
| cg01597329 | <i>KDM4B</i>    | chr19 | 0.800232751 | + T2D risk | 5'UTR   |
| cg14376436 | <i>AMD1</i>     | chr6  | 0.800288904 | + T2D risk | 5'UTR   |
| cg14376436 | <i>AMD1</i>     | chr6  | 0.800288904 | + T2D risk | Body    |
| cg05231509 | <i>NPAT</i>     | chr11 | 0.800351916 | - T2D risk | TSS1500 |
| cg23495748 | <i>CPLX2</i>    | chr5  | 0.800362515 | - T2D risk | 5'UTR   |
| cg23495748 | <i>CPLX2</i>    | chr5  | 0.800362515 | - T2D risk | 1stExon |
| cg09051775 | <i>TOX3</i>     | chr16 | 0.800402318 | + T2D risk | 5'UTR   |
| cg09051775 | <i>TOX3</i>     | chr16 | 0.800402318 | + T2D risk | Body    |
| cg17193175 | <i>SCARB2</i>   | chr4  | 0.800506436 | - T2D risk | Body    |
| cg16186097 | <i>ATXN1</i>    | chr6  | 0.800511506 | - T2D risk | 5'UTR   |
| cg27182923 | <i>ADCY5</i>    | chr3  | 0.800529716 | + T2D risk | Body    |
| cg22606039 | <i>IFT74</i>    | chr9  | 0.800681313 | - T2D risk | 5'UTR   |
| cg22606039 | <i>IFT74</i>    | chr9  | 0.800681313 | - T2D risk | TSS1500 |
| cg26831712 | <i>MMS19</i>    | chr10 | 0.800699092 | - T2D risk | Body    |
| cg08269119 | <i>WIZ</i>      | chr19 | 0.800700262 | - T2D risk | 5'UTR   |
| cg26964493 | <i>IFT74</i>    | chr9  | 0.80076633  | + T2D risk | 5'UTR   |
| cg26964493 | <i>IFT74</i>    | chr9  | 0.80076633  | + T2D risk | TSS1500 |
| cg08518510 | <i>TTC28</i>    | chr22 | 0.800820976 | + T2D risk | Body    |
| cg23125970 | <i>COL4A1</i>   | chr13 | 0.801203224 | + T2D risk | Body    |
| cg18721397 | <i>SUB1</i>     | chr5  | 0.801382424 | - T2D risk | TSS1500 |
| cg14910790 | <i>NPEPPS</i>   | chr17 | 0.801419881 | + T2D risk | TSS1500 |
| cg14519777 | <i>CUX1</i>     | chr7  | 0.801453466 | - T2D risk | Body    |
| cg15791559 | <i>ANKHD1</i>   | chr5  | 0.801453666 | + T2D risk | ExonBnd |
| cg15791559 | <i>ANKHD1</i>   | chr5  | 0.801453666 | + T2D risk | Body    |
| cg14888493 | <i>CPLX2</i>    | chr5  | 0.801509824 | + T2D risk | 5'UTR   |
| cg02874900 | <i>SLIT3</i>    | chr5  | 0.801568125 | - T2D risk | Body    |
| cg24056669 | <i>SGSM2</i>    | chr17 | 0.801608884 | + T2D risk | Body    |
| cg11323848 | <i>CUX2</i>     | chr12 | 0.801671655 | + T2D risk | Body    |
| cg08275278 | <i>DYNC111</i>  | chr7  | 0.802157669 | + T2D risk | 5'UTR   |
| cg07733471 | <i>CUX2</i>     | chr12 | 0.802319171 | - T2D risk | Body    |
| cg24850711 | <i>FLT1</i>     | chr13 | 0.802335619 | + T2D risk | Body    |
| cg08031829 | <i>TSHZ1</i>    | chr18 | 0.802461429 | - T2D risk | 5'UTR   |
| cg08031829 | <i>TSHZ1</i>    | chr18 | 0.802461429 | - T2D risk | Body    |
| cg11345330 | <i>KREMEN1</i>  | chr22 | 0.802463084 | + T2D risk | Body    |
| cg11297016 | <i>TENM2</i>    | chr5  | 0.802496603 | + T2D risk | Body    |
| cg00491428 | <i>PRKAG2</i>   | chr7  | 0.802501217 | + T2D risk | Body    |
| cg21769155 | <i>SGSM2</i>    | chr17 | 0.802525997 | - T2D risk | Body    |
| cg06243124 | <i>PTPRU</i>    | chr1  | 0.802546258 | + T2D risk | Body    |
| cg21868056 | <i>KREMEN1</i>  | chr22 | 0.802662345 | - T2D risk | Body    |
| cg11213383 | <i>SH3GL2</i>   | chr9  | 0.802678724 | + T2D risk | Body    |
| cg04706867 | <i>CNTNAP2</i>  | chr7  | 0.802838793 | + T2D risk | TSS1500 |
| cg09922087 | <i>TENM2</i>    | chr5  | 0.802907582 | - T2D risk | Body    |
| cg18124764 | <i>CUX1</i>     | chr7  | 0.802924085 | - T2D risk | Body    |
| cg18041482 | <i>NUP98</i>    | chr11 | 0.802960646 | + T2D risk | TSS1500 |
| cg24978636 | <i>ARHGAP32</i> | chr11 | 0.803111207 | + T2D risk | Body    |
| cg03151622 | <i>ULK4</i>     | chr3  | 0.803181706 | + T2D risk | Body    |
| cg19160520 | <i>ITPKB</i>    | chr1  | 0.803227585 | - T2D risk | TSS1500 |
| cg05326984 | <i>PLAGL1</i>   | chr6  | 0.803267494 | - T2D risk | TSS1500 |
| cg05326984 | <i>PLAGL1</i>   | chr6  | 0.803267494 | - T2D risk | 5'UTR   |
| cg03274401 | <i>ZDHHC2</i>   | chr8  | 0.80336455  | - T2D risk | Body    |
| cg05028306 | <i>LAP3</i>     | chr4  | 0.803373811 | - T2D risk | TSS1500 |
| cg10530190 | <i>KDR</i>      | chr4  | 0.803398891 | - T2D risk | Body    |
| cg16188466 | <i>DNAH9</i>    | chr17 | 0.803457103 | - T2D risk | Body    |
| cg15913875 | <i>RTN4</i>     | chr2  | 0.803469694 | - T2D risk | 3'UTR   |
| cg01540916 | <i>ASB9</i>     | chrX  | 0.803541319 | - T2D risk | TSS200  |
| cg01540916 | <i>ASB9</i>     | chrX  | 0.803541319 | - T2D risk | TSS1500 |
| cg22702351 | <i>PACRG</i>    | chr6  | 0.803641639 | + T2D risk | Body    |
| cg14071650 | <i>LMX1B</i>    | chr9  | 0.804033054 | - T2D risk | Body    |
| cg14649720 | <i>SSBP2</i>    | chr5  | 0.804157162 | - T2D risk | Body    |
| cg10456591 | <i>NCOA2</i>    | chr8  | 0.804218007 | - T2D risk | 5'UTR   |
| cg18715189 | <i>USP29</i>    | chr19 | 0.804316557 | + T2D risk | TSS200  |
| cg13353588 | <i>ANK3</i>     | chr10 | 0.804418413 | - T2D risk | Body    |
| cg11484283 | <i>FNIP2</i>    | chr4  | 0.804438784 | - T2D risk | Body    |
| cg05264454 | <i>PDE5A</i>    | chr4  | 0.804462974 | - T2D risk | 1stExon |
| cg05264454 | <i>PDE5A</i>    | chr4  | 0.804462974 | - T2D risk | TSS1500 |
| cg05264454 | <i>PDE5A</i>    | chr4  | 0.804462974 | - T2D risk | 5'UTR   |
| cg22510091 | <i>RAP1B</i>    | chr12 | 0.80447684  | - T2D risk | 5'UTR   |
| cg23954423 | <i>RCAN2</i>    | chr6  | 0.804627805 | + T2D risk | Body    |



|            |          |       |             |            |         |
|------------|----------|-------|-------------|------------|---------|
| cg15341071 | BCAT1    | chr12 | 0.804638855 | - T2D risk | Body    |
| cg10610949 | DIP2C    | chr10 | 0.80466381  | + T2D risk | Body    |
| cg04850212 | ATP8A2   | chr13 | 0.804688204 | - T2D risk | Body    |
| cg14609854 | PACRG    | chr6  | 0.804762049 | + T2D risk | Body    |
| cg22930505 | PPFIBP1  | chr12 | 0.804787395 | - T2D risk | 5'UTR   |
| cg25444386 | KDR      | chr4  | 0.804929439 | - T2D risk | Body    |
| cg14086205 | NOL4     | chr18 | 0.805125961 | - T2D risk | 5'UTR   |
| cg14086205 | NOL4     | chr18 | 0.805125961 | - T2D risk | Body    |
| cg19075506 | SPOCK1   | chr5  | 0.805228604 | - T2D risk | Body    |
| cg05868799 | NCOA2    | chr8  | 0.805258593 | + T2D risk | TSS1500 |
| cg02270591 | CADM1    | chr11 | 0.805292742 | + T2D risk | Body    |
| cg26393261 | ATXN1    | chr6  | 0.805323889 | + T2D risk | 5'UTR   |
| cg03550951 | RGS7     | chr1  | 0.805516702 | + T2D risk | Body    |
| cg09419444 | WWP2     | chr16 | 0.805554637 | - T2D risk | TSS200  |
| cg09419444 | WWP2     | chr16 | 0.805554637 | - T2D risk | Body    |
| cg02772663 | GRK5     | chr10 | 0.80563543  | + T2D risk | Body    |
| cg01884649 | PPP1R12A | chr12 | 0.805649083 | + T2D risk | TSS1500 |
| cg08501301 | RAP1GAP2 | chr17 | 0.805706963 | + T2D risk | Body    |
| cg09361409 | NQO1     | chr16 | 0.805780595 | + T2D risk | 5'UTR   |
| cg09361409 | NQO1     | chr16 | 0.805780595 | + T2D risk | 1stExon |
| cg08020273 | RAP1GAP2 | chr17 | 0.805786168 | + T2D risk | Body    |
| cg12719548 | DYNC1I1  | chr7  | 0.80586954  | + T2D risk | TSS200  |
| cg09982118 | NCOR1    | chr17 | 0.805912983 | + T2D risk | Body    |
| cg18994831 | WDR48    | chr3  | 0.806037311 | - T2D risk | Body    |
| cg08021031 | DIP2C    | chr10 | 0.806040043 | + T2D risk | Body    |
| cg26884261 | MMS19    | chr10 | 0.806045578 | - T2D risk | TSS200  |
| cg19801256 | ITGA1    | chr5  | 0.806273436 | + T2D risk | Body    |
| cg01270273 | TOP2A    | chr17 | 0.806345256 | - T2D risk | Body    |
| cg06147887 | ARID2    | chr12 | 0.806367583 | + T2D risk | Body    |
| cg04402875 | RET      | chr10 | 0.806463594 | + T2D risk | Body    |
| cg27427207 | ATP8A1   | chr4  | 0.806510944 | + T2D risk | Body    |
| cg12089350 | DIP2C    | chr10 | 0.806551874 | - T2D risk | Body    |
| cg27651321 | ITPKB    | chr1  | 0.806771544 | - T2D risk | Body    |
| cg08561821 | SGSM2    | chr17 | 0.806872627 | + T2D risk | 1stExon |
| cg04867439 | SPOCK1   | chr5  | 0.807054535 | - T2D risk | Body    |
| cg23902454 | TJP1     | chr15 | 0.807100403 | + T2D risk | Body    |
| cg23017850 | ATXN1    | chr6  | 0.807255757 | - T2D risk | 5'UTR   |
| cg27478060 | ATP2B1   | chr12 | 0.80725982  | - T2D risk | ExonBnd |
| cg27478060 | ATP2B1   | chr12 | 0.80725982  | - T2D risk | Body    |
| cg13051302 | MEIS2    | chr15 | 0.807314984 | + T2D risk | Body    |
| cg19674166 | PDLIM5   | chr4  | 0.807371286 | - T2D risk | Body    |
| cg14072851 | PACS1    | chr11 | 0.807426863 | + T2D risk | Body    |
| cg13888639 | PRKAG2   | chr7  | 0.807429447 | - T2D risk | Body    |
| cg13777294 | ACSS2    | chr20 | 0.807480929 | + T2D risk | Body    |
| cg13777294 | ACSS2    | chr20 | 0.807480929 | + T2D risk | TSS1500 |
| cg03452993 | DIP2C    | chr10 | 0.80751704  | + T2D risk | Body    |
| cg06375042 | ST6GAL1  | chr3  | 0.807555727 | + T2D risk | 5'UTR   |
| cg27510901 | DNAJC1   | chr10 | 0.807651017 | - T2D risk | TSS1500 |
| cg23833009 | PLEKHG3  | chr14 | 0.807771361 | + T2D risk | 5'UTR   |
| cg21156006 | LMX1B    | chr9  | 0.807845953 | - T2D risk | Body    |
| cg26400938 | ANK3     | chr10 | 0.807900532 | - T2D risk | TSS1500 |
| cg26400938 | ANK3     | chr10 | 0.807900532 | - T2D risk | Body    |
| cg08793328 | PLEKHG3  | chr14 | 0.807926243 | + T2D risk | 5'UTR   |
| cg02648515 | PRKCB    | chr16 | 0.807979287 | + T2D risk | Body    |
| cg07959068 | PRKCB    | chr16 | 0.807992137 | + T2D risk | Body    |
| cg14078108 | NOTCH3   | chr19 | 0.808004868 | + T2D risk | Body    |
| cg04841442 | ACSS2    | chr20 | 0.808280731 | - T2D risk | TSS1500 |
| cg04841442 | ACSS2    | chr20 | 0.808280731 | - T2D risk | 5'UTR   |
| cg11281641 | GAD1     | chr2  | 0.808296981 | - T2D risk | 5'UTR   |
| cg09238506 | RNF217   | chr6  | 0.808374515 | + T2D risk | Body    |
| cg17418368 | CRYL1    | chr13 | 0.808492989 | - T2D risk | Body    |
| cg19026233 | UNC80    | chr2  | 0.808518706 | + T2D risk | Body    |
| cg11903128 | ATP6V1H  | chr8  | 0.808569242 | + T2D risk | Body    |
| cg04536319 | DIP2C    | chr10 | 0.808696003 | + T2D risk | Body    |
| cg24603001 | ULK4     | chr3  | 0.808757787 | - T2D risk | Body    |
| cg25816160 | EVI5     | chr1  | 0.808818853 | + T2D risk | Body    |
| cg11554529 | SLC29A4  | chr7  | 0.808886554 | - T2D risk | Body    |
| cg14635269 | LMX1B    | chr9  | 0.808918973 | + T2D risk | Body    |
| cg15897624 | CUX2     | chr12 | 0.808959283 | - T2D risk | Body    |
| cg11860753 | ST6GAL1  | chr3  | 0.809102174 | - T2D risk | 5'UTR   |



|            |          |       |             |            |         |
|------------|----------|-------|-------------|------------|---------|
| cg04476019 | AGPAT3   | chr21 | 0.809110932 | + T2D risk | Body    |
| cg18061035 | KIAA0232 | chr4  | 0.809290825 | - T2D risk | TSS1500 |
| cg01157600 | TAB2     | chr6  | 0.809500727 | + T2D risk | Body    |
| cg18503829 | DIP2C    | chr10 | 0.809534179 | + T2D risk | Body    |
| cg06108551 | TSC22D1  | chr13 | 0.809557748 | + T2D risk | Body    |
| cg06108551 | TSC22D1  | chr13 | 0.809557748 | + T2D risk | 5'UTR   |
| cg08036343 | ERC2     | chr3  | 0.809636172 | + T2D risk | Body    |
| cg00328523 | ATP6V1H  | chr8  | 0.809644239 | - T2D risk | Body    |
| cg04849508 | GNA12    | chr7  | 0.809659779 | + T2D risk | Body    |
| cg01023982 | ANKHD1   | chr5  | 0.809790478 | + T2D risk | Body    |
| cg03625426 | TJP1     | chr15 | 0.809889554 | - T2D risk | Body    |
| cg12938891 | LMX1B    | chr9  | 0.810034535 | - T2D risk | Body    |
| cg16467725 | ATRNL1   | chr10 | 0.810043543 | - T2D risk | Body    |
| cg09822356 | PRKCE    | chr2  | 0.81031958  | - T2D risk | Body    |
| cg22753057 | ADCY5    | chr3  | 0.810325604 | - T2D risk | Body    |
| cg07262540 | TTC28    | chr22 | 0.810345741 | - T2D risk | Body    |
| cg02659117 | KIAA0232 | chr4  | 0.810379431 | - T2D risk | TSS1500 |
| cg16656041 | ZHX2     | chr8  | 0.810399298 | - T2D risk | 5'UTR   |
| cg16934360 | PDLIM5   | chr4  | 0.810408646 | - T2D risk | 5'UTR   |
| cg16934360 | PDLIM5   | chr4  | 0.810408646 | - T2D risk | Body    |
| cg22043381 | ZHX2     | chr8  | 0.810518419 | + T2D risk | 5'UTR   |
| cg21951543 | SRPK2    | chr7  | 0.810835782 | + T2D risk | Body    |
| cg12877169 | MEIS2    | chr15 | 0.811002076 | - T2D risk | 3'UTR   |
| cg25592301 | POC1B    | chr12 | 0.811317501 | - T2D risk | TSS200  |
| cg25592301 | POC1B    | chr12 | 0.811317501 | - T2D risk | TSS1500 |
| cg07052063 | MMS19    | chr10 | 0.811403535 | - T2D risk | Body    |
| cg15568213 | ZHX2     | chr8  | 0.811426436 | - T2D risk | 5'UTR   |
| cg24135946 | TSC22D1  | chr13 | 0.811459136 | + T2D risk | Body    |
| cg24135946 | TSC22D1  | chr13 | 0.811459136 | + T2D risk | 5'UTR   |
| cg24135946 | TSC22D1  | chr13 | 0.811459136 | + T2D risk | 1stExon |
| cg26059202 | SPOCK1   | chr5  | 0.811515682 | - T2D risk | Body    |
| cg06696564 | ADCY5    | chr3  | 0.811628455 | - T2D risk | Body    |
| cg27565556 | USP53    | chr4  | 0.811652358 | + T2D risk | 5'UTR   |
| cg24351167 | PHACTR1  | chr6  | 0.81167685  | + T2D risk | Body    |
| cg18756426 | PACRG    | chr6  | 0.811686972 | + T2D risk | Body    |
| cg26099468 | NCOR1    | chr17 | 0.811758825 | + T2D risk | Body    |
| cg23752086 | PDE3A    | chr12 | 0.811818302 | + T2D risk | TSS200  |
| cg05053955 | CUX1     | chr7  | 0.811846083 | + T2D risk | 3'UTR   |
| cg05053955 | CUX1     | chr7  | 0.811846083 | + T2D risk | Body    |
| cg19340837 | PACRG    | chr6  | 0.811989421 | - T2D risk | Body    |
| cg17195002 | COL4A1   | chr13 | 0.812024143 | - T2D risk | Body    |
| cg09633353 | RTN4     | chr2  | 0.812136312 | - T2D risk | Body    |
| cg09633353 | RTN4     | chr2  | 0.812136312 | - T2D risk | 5'UTR   |
| cg10451310 | UXS1     | chr2  | 0.812147229 | + T2D risk | TSS1500 |
| cg21764708 | PRKAG2   | chr7  | 0.812260566 | + T2D risk | 5'UTR   |
| cg21764708 | PRKAG2   | chr7  | 0.812260566 | + T2D risk | Body    |
| cg18685240 | PLEKHG3  | chr14 | 0.812280282 | - T2D risk | Body    |
| cg18685240 | PLEKHG3  | chr14 | 0.812280282 | - T2D risk | ExonBnd |
| cg07709297 | GLG1     | chr16 | 0.812288385 | - T2D risk | Body    |
| cg01173642 | ATXN1    | chr6  | 0.812353721 | + T2D risk | Body    |
| cg17141500 | RSF1     | chr11 | 0.812473732 | + T2D risk | TSS1500 |
| cg13534394 | ATXN1    | chr6  | 0.812535323 | + T2D risk | 5'UTR   |
| cg00493362 | KCNIP3   | chr2  | 0.812566507 | - T2D risk | Body    |
| cg04738774 | CALD1    | chr7  | 0.812785569 | - T2D risk | 5'UTR   |
| cg05313009 | KREMEN1  | chr22 | 0.812898993 | + T2D risk | TSS200  |
| cg10599735 | ITGA1    | chr5  | 0.81321702  | - T2D risk | Body    |
| cg06059854 | NCOA2    | chr8  | 0.813221721 | - T2D risk | 5'UTR   |
| cg17337477 | MAN1A1   | chr6  | 0.813284959 | - T2D risk | Body    |
| cg17426905 | DDC      | chr7  | 0.813403917 | + T2D risk | 5'UTR   |
| cg25130433 | KDR      | chr4  | 0.813683157 | - T2D risk | TSS1500 |
| cg01970818 | ACTN4    | chr19 | 0.813736749 | + T2D risk | Body    |
| cg15039415 | NPEPPS   | chr17 | 0.81384164  | + T2D risk | Body    |
| cg19278809 | KIAA0232 | chr4  | 0.813883796 | - T2D risk | 5'UTR   |
| cg26598749 | RRAGB    | chrX  | 0.813928303 | + T2D risk | Body    |
| cg25687929 | ATP8A2   | chr13 | 0.813948621 | - T2D risk | Body    |
| cg12055265 | ANK2     | chr4  | 0.814091601 | - T2D risk | Body    |
| cg10819495 | PI15     | chr8  | 0.814181819 | - T2D risk | TSS1500 |
| cg08194933 | CLEC16A  | chr16 | 0.814204631 | - T2D risk | Body    |
| cg00783080 | ATP6V1H  | chr8  | 0.814261646 | - T2D risk | TSS1500 |
| cg16509291 | ATXN1    | chr6  | 0.814299321 | + T2D risk | Body    |



|            |          |       |             |            |         |
|------------|----------|-------|-------------|------------|---------|
| cg20088478 | STX6     | chr1  | 0.814347646 | - T2D risk | 5'UTR   |
| cg20088478 | STX6     | chr1  | 0.814347646 | - T2D risk | Body    |
| cg11570656 | TSC22D1  | chr13 | 0.814389555 | - T2D risk | 1stExon |
| cg08763063 | CNTNAP2  | chr7  | 0.814705855 | - T2D risk | Body    |
| cg20595750 | DIP2C    | chr10 | 0.8147438   | + T2D risk | Body    |
| cg05320384 | TBC1D5   | chr3  | 0.814850671 | - T2D risk | 5'UTR   |
| cg18315896 | APC      | chr5  | 0.814852718 | + T2D risk | TSS200  |
| cg13212963 | PACRG    | chr6  | 0.814908804 | + T2D risk | Body    |
| cg09232203 | SRPK2    | chr7  | 0.814947952 | + T2D risk | Body    |
| cg25431929 | PACRG    | chr6  | 0.814957329 | - T2D risk | Body    |
| cg03396594 | DNAJC13  | chr3  | 0.815044996 | - T2D risk | 5'UTR   |
| cg04114386 | ATP8A1   | chr4  | 0.815223989 | - T2D risk | Body    |
| cg18397450 | PACS2    | chr14 | 0.815241643 | + T2D risk | Body    |
| cg22311879 | NOTCH3   | chr19 | 0.81528746  | - T2D risk | Body    |
| cg09564290 | KDM4B    | chr19 | 0.815366694 | + T2D risk | 5'UTR   |
| cg12072803 | KDM4B    | chr19 | 0.815404997 | - T2D risk | TSS1500 |
| cg10364896 | CREBBP   | chr16 | 0.815538714 | - T2D risk | Body    |
| cg17055304 | ACTN4    | chr19 | 0.81555796  | - T2D risk | TSS1500 |
| cg08331184 | PRKCE    | chr2  | 0.815780326 | + T2D risk | Body    |
| cg15860633 | SKAP1    | chr17 | 0.815802433 | + T2D risk | Body    |
| cg14909179 | CHID1    | chr11 | 0.815836159 | - T2D risk | Body    |
| cg21073930 | MAST1    | chr19 | 0.815891066 | + T2D risk | Body    |
| cg17891423 | INPP4A   | chr2  | 0.81596132  | - T2D risk | Body    |
| cg15993383 | ADCY5    | chr3  | 0.816161949 | + T2D risk | TSS200  |
| cg18004545 | CUX1     | chr7  | 0.816210345 | - T2D risk | Body    |
| cg19107055 | DDC      | chr7  | 0.816316564 | - T2D risk | Body    |
| cg23513337 | KIAA1217 | chr10 | 0.816322566 | - T2D risk | ExonBnd |
| cg23513337 | KIAA1217 | chr10 | 0.816322566 | - T2D risk | Body    |
| cg25165908 | CUX2     | chr12 | 0.816331269 | - T2D risk | Body    |
| cg20553524 | SLC7A2   | chr8  | 0.816337912 | + T2D risk | Body    |
| cg20553524 | SLC7A2   | chr8  | 0.816337912 | + T2D risk | 5'UTR   |
| cg20449769 | RAP1GAP2 | chr17 | 0.816352544 | - T2D risk | Body    |
| cg18440893 | ATXN1    | chr6  | 0.816380443 | - T2D risk | 5'UTR   |
| cg17269169 | DIP2C    | chr10 | 0.816432892 | + T2D risk | Body    |
| cg18633926 | FAM160A1 | chr4  | 0.816594738 | + T2D risk | Body    |
| cg16253235 | AGPAT3   | chr21 | 0.816791422 | + T2D risk | 5'UTR   |
| cg16299038 | NUP98    | chr11 | 0.816829989 | - T2D risk | Body    |
| cg21396949 | KIAA1217 | chr10 | 0.817012823 | - T2D risk | Body    |
| cg06926026 | SPAG9    | chr17 | 0.817042343 | - T2D risk | TSS1500 |
| cg25582924 | PACS2    | chr14 | 0.817076598 | - T2D risk | Body    |
| cg12259742 | DIP2C    | chr10 | 0.817372609 | - T2D risk | Body    |
| cg27356296 | CALD1    | chr7  | 0.817404888 | + T2D risk | Body    |
| cg05438837 | CRYL1    | chr13 | 0.817423427 | - T2D risk | Body    |
| cg01246435 | CLEC16A  | chr16 | 0.817474407 | + T2D risk | Body    |
| cg20327444 | COL4A1   | chr13 | 0.817477287 | + T2D risk | TSS200  |
| cg11033835 | ROBO2    | chr3  | 0.817540884 | + T2D risk | TSS1500 |
| cg15834037 | ITPKB    | chr1  | 0.817549305 | - T2D risk | Body    |
| cg12817423 | PPP1R12A | chr12 | 0.81772669  | + T2D risk | TSS200  |
| cg12817423 | PPP1R12A | chr12 | 0.81772669  | + T2D risk | TSS1500 |
| cg25205758 | PLAGL1   | chr6  | 0.817732357 | + T2D risk | 5'UTR   |
| cg25205758 | PLAGL1   | chr6  | 0.817732357 | + T2D risk | 1stExon |
| cg00814597 | PLAGL1   | chr6  | 0.817791004 | + T2D risk | TSS1500 |
| cg19819206 | NPAT     | chr11 | 0.817865415 | + T2D risk | Body    |
| cg10324909 | KANTR    | chrX  | 0.818022521 | + T2D risk | Body    |
| cg22416376 | SLC7A2   | chr8  | 0.818095162 | - T2D risk | 5'UTR   |
| cg22416376 | SLC7A2   | chr8  | 0.818095162 | - T2D risk | TSS1500 |
| cg01158469 | WWP2     | chr16 | 0.818103369 | - T2D risk | Body    |
| cg06084271 | ERC2     | chr3  | 0.818152672 | - T2D risk | Body    |
| cg03311849 | PPP1R12A | chr12 | 0.818159916 | - T2D risk | Body    |
| cg03957751 | ANK2     | chr4  | 0.818165173 | + T2D risk | Body    |
| cg18831688 | TSHZ1    | chr18 | 0.818189985 | - T2D risk | 5'UTR   |
| cg18831688 | TSHZ1    | chr18 | 0.818189985 | - T2D risk | Body    |
| cg26874591 | PACS1    | chr11 | 0.818489275 | - T2D risk | 3'UTR   |
| cg00937966 | CUX2     | chr12 | 0.818548819 | + T2D risk | Body    |
| cg15125438 | TPCN1    | chr12 | 0.818747222 | + T2D risk | Body    |
| cg02628286 | GLG1     | chr16 | 0.818792714 | + T2D risk | Body    |
| cg09363017 | CLIC5    | chr6  | 0.818930731 | - T2D risk | Body    |
| cg03738154 | JPH2     | chr20 | 0.819013253 | - T2D risk | Body    |
| cg00950418 | SRPK2    | chr7  | 0.819065145 | - T2D risk | Body    |
| cg04985661 | PHACTR1  | chr6  | 0.819085962 | - T2D risk | TSS1500 |



|            |          |       |             |            |         |
|------------|----------|-------|-------------|------------|---------|
| cg02514579 | DIP2C    | chr10 | 0.819117648 | + T2D risk | Body    |
| cg22879191 | CUX1     | chr7  | 0.819227054 | - T2D risk | Body    |
| cg17866051 | SGSM2    | chr17 | 0.819247134 | - T2D risk | Body    |
| cg11401257 | ITPKB    | chr1  | 0.819289199 | - T2D risk | TSS200  |
| cg02479744 | ATXN1    | chr6  | 0.819318048 | + T2D risk | 3'UTR   |
| cg22237104 | SPAG9    | chr17 | 0.819609914 | - T2D risk | Body    |
| cg00025328 | RBM4     | chr11 | 0.819753343 | - T2D risk | TSS1500 |
| cg08314723 | PACRG    | chr6  | 0.819832643 | - T2D risk | Body    |
| cg00746006 | TOP2A    | chr17 | 0.819863781 | - T2D risk | Body    |
| cg22742992 | INPP4A   | chr2  | 0.820032076 | - T2D risk | 5'UTR   |
| cg27584280 | PPFIBP1  | chr12 | 0.820038131 | - T2D risk | 5'UTR   |
| cg12571155 | ITPKB    | chr1  | 0.820149845 | + T2D risk | Body    |
| cg13786328 | ANK3     | chr10 | 0.820191547 | + T2D risk | Body    |
| cg08409687 | NDUFB3   | chr2  | 0.820218264 | + T2D risk | TSS1500 |
| cg12478381 | SEZ6L    | chr22 | 0.820322464 | + T2D risk | TSS1500 |
| cg18928811 | CLOCK    | chr4  | 0.820496175 | + T2D risk | 5'UTR   |
| cg22375518 | RANBP17  | chr5  | 0.820553743 | + T2D risk | TSS200  |
| cg15889847 | PLEKHG3  | chr14 | 0.820695752 | - T2D risk | 5'UTR   |
| cg06065608 | PACRG    | chr6  | 0.820707845 | - T2D risk | TSS200  |
| cg06065608 | PACRG    | chr6  | 0.820707845 | - T2D risk | TSS1500 |
| cg07086947 | PACS2    | chr14 | 0.820745832 | - T2D risk | Body    |
| cg08929303 | PFKFB2   | chr1  | 0.82084046  | - T2D risk | 5'UTR   |
| cg21629546 | KIAA1217 | chr10 | 0.820875324 | - T2D risk | 5'UTR   |
| cg21629546 | KIAA1217 | chr10 | 0.820875324 | - T2D risk | Body    |
| cg26817217 | TOX3     | chr16 | 0.82089437  | - T2D risk | 5'UTR   |
| cg26817217 | TOX3     | chr16 | 0.82089437  | - T2D risk | TSS200  |
| cg01442104 | FNIP2    | chr4  | 0.820929824 | + T2D risk | 1stExon |
| cg01442104 | FNIP2    | chr4  | 0.820929824 | + T2D risk | 5'UTR   |
| cg09678315 | NGF      | chr1  | 0.821002387 | + T2D risk | 5'UTR   |
| cg22615330 | PRKAG2   | chr7  | 0.82120681  | + T2D risk | 5'UTR   |
| cg22615330 | PRKAG2   | chr7  | 0.82120681  | + T2D risk | Body    |
| cg13951700 | GRK5     | chr10 | 0.821295001 | + T2D risk | Body    |
| cg02611466 | CUX1     | chr7  | 0.821398055 | - T2D risk | Body    |
| cg02373908 | CHID1    | chr11 | 0.821880798 | - T2D risk | 5'UTR   |
| cg16686816 | RPGR     | chrX  | 0.821963281 | + T2D risk | Body    |
| cg14977256 | DIP2C    | chr10 | 0.822007781 | - T2D risk | Body    |
| cg23649619 | TMEM131  | chr2  | 0.822051289 | - T2D risk | Body    |
| cg16509445 | CRYL1    | chr13 | 0.82210486  | + T2D risk | Body    |
| cg26783086 | CNTNAP2  | chr7  | 0.822114731 | + T2D risk | Body    |
| cg15087178 | ANK3     | chr10 | 0.822267144 | - T2D risk | Body    |
| cg00096806 | TANC2    | chr17 | 0.822271272 | - T2D risk | 1stExon |
| cg05049329 | ITPKB    | chr1  | 0.82229948  | + T2D risk | Body    |
| cg01778622 | PDE5A    | chr4  | 0.822353946 | + T2D risk | 3'UTR   |
| cg02413048 | TENM2    | chr5  | 0.822395483 | - T2D risk | Body    |
| cg24402323 | GGPS1    | chr1  | 0.822657102 | + T2D risk | TSS1500 |
| cg22963133 | ARL15    | chr5  | 0.822694949 | + T2D risk | Body    |
| cg14575697 | ADCY5    | chr3  | 0.822773593 | - T2D risk | Body    |
| cg04248461 | DIP2C    | chr10 | 0.822774681 | - T2D risk | Body    |
| cg22304838 | NCOA2    | chr8  | 0.822776265 | - T2D risk | 5'UTR   |
| cg14803663 | POC1B    | chr12 | 0.822798833 | + T2D risk | TSS1500 |
| cg14765383 | GLG1     | chr16 | 0.822849585 | + T2D risk | 3'UTR   |
| cg14765383 | GLG1     | chr16 | 0.822849585 | + T2D risk | Body    |
| cg00859481 | DYNC111  | chr7  | 0.823009395 | + T2D risk | TSS1500 |
| cg17294081 | ATRN     | chr20 | 0.823160985 | - T2D risk | Body    |
| cg13047822 | PRKACB   | chr1  | 0.823373193 | - T2D risk | Body    |
| cg24707189 | SLC7A2   | chr8  | 0.823439249 | + T2D risk | 5'UTR   |
| cg12964647 | SKAP1    | chr17 | 0.823486952 | - T2D risk | Body    |
| cg02867216 | TSHZ1    | chr18 | 0.823563757 | - T2D risk | 5'UTR   |
| cg09031790 | PRKCB    | chr16 | 0.82358082  | - T2D risk | Body    |
| cg20494085 | LAP3     | chr4  | 0.823679744 | - T2D risk | ExonBnd |
| cg20494085 | LAP3     | chr4  | 0.823679744 | - T2D risk | Body    |
| cg11786558 | SGSM2    | chr17 | 0.823723955 | - T2D risk | Body    |
| cg15911651 | FBXL2    | chr3  | 0.823880642 | - T2D risk | 3'UTR   |
| cg27526761 | MEIS2    | chr15 | 0.823893344 | - T2D risk | Body    |
| cg07879785 | CRYL1    | chr13 | 0.823952617 | + T2D risk | Body    |
| cg03582574 | ARPP19   | chr15 | 0.824030208 | + T2D risk | TSS1500 |
| cg03582574 | ARPP19   | chr15 | 0.824030208 | + T2D risk | TSS200  |
| cg17705631 | GNA12    | chr7  | 0.82411054  | + T2D risk | Body    |
| cg15965422 | ATP6V1H  | chr8  | 0.824232775 | - T2D risk | Body    |
| cg06375706 | ANK3     | chr10 | 0.824234979 | - T2D risk | ExonBnd |



|            |           |       |             |            |         |
|------------|-----------|-------|-------------|------------|---------|
| cg06375706 | ANK3      | chr10 | 0.824234979 | - T2D risk | Body    |
| cg24843474 | RGS7      | chr1  | 0.824306365 | + T2D risk | TSS200  |
| cg17390821 | TAB2      | chr6  | 0.824314971 | + T2D risk | Body    |
| cg21898465 | TPCN1     | chr12 | 0.824427379 | - T2D risk | Body    |
| cg21526357 | RAP1GAP2  | chr17 | 0.824542431 | - T2D risk | TSS1500 |
| cg14178352 | ATP8A2    | chr13 | 0.824579485 | + T2D risk | Body    |
| cg09753973 | TTC28     | chr22 | 0.824701812 | + T2D risk | Body    |
| cg27568860 | HNRNPA2B1 | chr7  | 0.824712497 | + T2D risk | TSS1500 |
| cg12443256 | FNIP2     | chr4  | 0.824806449 | - T2D risk | Body    |
| cg14745370 | RAP1GAP2  | chr17 | 0.824839916 | - T2D risk | Body    |
| cg18361081 | SKAP1     | chr17 | 0.824860074 | + T2D risk | Body    |
| cg23357250 | DNAH9     | chr17 | 0.824989187 | - T2D risk | TSS1500 |
| cg13485454 | CPLX2     | chr5  | 0.825028653 | - T2D risk | 5'UTR   |
| cg10178523 | FNIP2     | chr4  | 0.825039095 | - T2D risk | ExonBnd |
| cg10178523 | FNIP2     | chr4  | 0.825039095 | - T2D risk | Body    |
| cg23233631 | MGRN1     | chr16 | 0.825052316 | + T2D risk | Body    |
| cg18000216 | ERC2      | chr3  | 0.825115175 | + T2D risk | 3'UTR   |
| cg16844053 | CUL1      | chr7  | 0.825124196 | + T2D risk | 5'UTR   |
| cg22992099 | NF1       | chr17 | 0.825268591 | + T2D risk | Body    |
| cg23861625 | ZRANB1    | chr10 | 0.825271905 | + T2D risk | Body    |
| cg05677391 | RNF217    | chr6  | 0.82540815  | + T2D risk | Body    |
| cg17150794 | SKAP1     | chr17 | 0.825409943 | - T2D risk | Body    |
| cg02242239 | PRKCE     | chr2  | 0.825427164 | + T2D risk | Body    |
| cg01814095 | CADM1     | chr11 | 0.825528876 | - T2D risk | Body    |
| cg14168939 | CHFR      | chr12 | 0.825660883 | - T2D risk | 3'UTR   |
| cg20046875 | ARIH1     | chr15 | 0.825814675 | - T2D risk | TSS200  |
| cg07433228 | TTC28     | chr22 | 0.825850483 | + T2D risk | Body    |
| cg00443596 | NOL4      | chr18 | 0.825931402 | - T2D risk | Body    |
| cg00443596 | NOL4      | chr18 | 0.825931402 | - T2D risk | TSS200  |
| cg17886162 | SMG7      | chr1  | 0.825984934 | + T2D risk | TSS1500 |
| cg11823214 | NUF2      | chr1  | 0.825987769 | + T2D risk | TSS1500 |
| cg25339433 | ULK4      | chr3  | 0.825992896 | - T2D risk | Body    |
| cg17171920 | MEIS2     | chr15 | 0.826044692 | - T2D risk | Body    |
| cg26059790 | PRKD1     | chr14 | 0.8260542   | + T2D risk | Body    |
| cg10879507 | PRKD1     | chr14 | 0.82616251  | + T2D risk | Body    |
| cg18169186 | ARPP19    | chr15 | 0.82655905  | + T2D risk | TSS1500 |
| cg18169186 | ARPP19    | chr15 | 0.82655905  | + T2D risk | 5'UTR   |
| cg18169186 | ARPP19    | chr15 | 0.82655905  | + T2D risk | 1stExon |
| cg18169186 | ARPP19    | chr15 | 0.82655905  | + T2D risk | TSS200  |
| cg12167688 | RAP1GAP2  | chr17 | 0.826630099 | + T2D risk | Body    |
| cg00200803 | CDH22     | chr20 | 0.826668285 | - T2D risk | Body    |
| cg12703853 | ATXN1     | chr6  | 0.826740353 | - T2D risk | 5'UTR   |
| cg17132972 | TANC2     | chr17 | 0.826812605 | + T2D risk | Body    |
| cg02489228 | TMEM131   | chr2  | 0.826827953 | + T2D risk | Body    |
| cg13948104 | PDE3A     | chr12 | 0.826904561 | + T2D risk | Body    |
| cg25683358 | KIAA1217  | chr10 | 0.826939216 | + T2D risk | Body    |
| cg20571284 | APC       | chr5  | 0.826973153 | - T2D risk | Body    |
| cg03561491 | PACS2     | chr14 | 0.82705511  | + T2D risk | ExonBnd |
| cg03561491 | PACS2     | chr14 | 0.82705511  | + T2D risk | Body    |
| cg10283188 | PHF21A    | chr11 | 0.827250841 | + T2D risk | Body    |
| cg01694939 | CHID1     | chr11 | 0.827389299 | - T2D risk | Body    |
| cg20269607 | PRKAG2    | chr7  | 0.827422793 | - T2D risk | 5'UTR   |
| cg20269607 | PRKAG2    | chr7  | 0.827422793 | - T2D risk | Body    |
| cg21340782 | KREMEN1   | chr22 | 0.827445636 | - T2D risk | Body    |
| cg08261634 | PRKCB     | chr16 | 0.827448268 | - T2D risk | Body    |
| cg08365466 | PTP4A2    | chr1  | 0.827468654 | - T2D risk | 5'UTR   |
| cg08365466 | PTP4A2    | chr1  | 0.827468654 | - T2D risk | TSS200  |
| cg03295998 | PRKCE     | chr2  | 0.827486356 | + T2D risk | Body    |
| cg14884696 | NPEPPS    | chr17 | 0.827495685 | - T2D risk | Body    |
| cg05949569 | FAM160A1  | chr4  | 0.827767233 | - T2D risk | Body    |
| cg25553638 | CUX2      | chr12 | 0.827883737 | - T2D risk | Body    |
| cg22993535 | TMEM150C  | chr4  | 0.827981946 | - T2D risk | TSS1500 |
| cg07266412 | CUX1      | chr7  | 0.827984414 | - T2D risk | Body    |
| cg18197263 | JPH2      | chr20 | 0.828309644 | - T2D risk | Body    |
| cg18128115 | PRKCB     | chr16 | 0.828318324 | + T2D risk | Body    |
| cg14518607 | SLIT3     | chr5  | 0.828327828 | + T2D risk | Body    |
| cg18194343 | TSC22D1   | chr13 | 0.828421238 | - T2D risk | TSS1500 |
| cg18194343 | TSC22D1   | chr13 | 0.828421238 | - T2D risk | Body    |
| cg20428768 | SPOCK1    | chr5  | 0.828699956 | - T2D risk | Body    |
| cg18398753 | STX6      | chr1  | 0.828735377 | + T2D risk | Body    |



|            |          |       |             |            |         |
|------------|----------|-------|-------------|------------|---------|
| cg24776142 | ATXN1    | chr6  | 0.828787381 | + T2D risk | 5'UTR   |
| cg26570476 | KIAA0355 | chr19 | 0.828837931 | - T2D risk | Body    |
| cg14196195 | CHFR     | chr12 | 0.829004347 | + T2D risk | Body    |
| cg13736004 | BCAT1    | chr12 | 0.829233244 | - T2D risk | Body    |
| cg13661109 | LMX1B    | chr9  | 0.829245536 | + T2D risk | Body    |
| cg17493489 | CNTNAP2  | chr7  | 0.829384419 | - T2D risk | Body    |
| cg15673616 | CUX1     | chr7  | 0.829522269 | + T2D risk | Body    |
| cg11732257 | GGPS1    | chr1  | 0.82955906  | - T2D risk | 5'UTR   |
| cg11732257 | GGPS1    | chr1  | 0.82955906  | - T2D risk | 1stExon |
| cg04029168 | PRKCB    | chr16 | 0.829601585 | + T2D risk | Body    |
| cg23517600 | ERC2     | chr3  | 0.829658793 | + T2D risk | Body    |
| cg22913584 | SSBP2    | chr5  | 0.829714542 | - T2D risk | Body    |
| cg04865026 | NDUFB3   | chr2  | 0.82976526  | + T2D risk | 5'UTR   |
| cg04865026 | NDUFB3   | chr2  | 0.82976526  | + T2D risk | 1stExon |
| cg12030351 | ITPKB    | chr1  | 0.829807734 | + T2D risk | Body    |
| cg24702106 | PRKAG2   | chr7  | 0.829925218 | + T2D risk | Body    |
| cg21656748 | SCARB2   | chr4  | 0.829931477 | - T2D risk | TSS1500 |
| cg00376464 | PACRG    | chr6  | 0.829980845 | - T2D risk | Body    |
| cg05915447 | KIAA1109 | chr4  | 0.829990095 | - T2D risk | Body    |
| cg09340842 | ATXN1    | chr6  | 0.829998042 | - T2D risk | 5'UTR   |
| cg09340842 | ATXN1    | chr6  | 0.829998042 | - T2D risk | ExonBnd |
| cg22075956 | PPP1R12A | chr12 | 0.830004437 | - T2D risk | Body    |
| cg11911122 | NCOA2    | chr8  | 0.830085835 | + T2D risk | TSS1500 |
| cg24853765 | WDR47    | chr1  | 0.83013999  | - T2D risk | TSS200  |
| cg09643539 | ARL15    | chr5  | 0.830201233 | - T2D risk | Body    |
| cg05360064 | JPH2     | chr20 | 0.830371467 | - T2D risk | Body    |
| cg17208484 | CADM1    | chr11 | 0.830445537 | + T2D risk | Body    |
| cg07261828 | KCNIP3   | chr2  | 0.830496374 | + T2D risk | Body    |
| cg15084269 | STX6     | chr1  | 0.83049933  | - T2D risk | TSS1500 |
| cg02466617 | GRK5     | chr10 | 0.830511505 | + T2D risk | Body    |
| cg01253289 | PTPRU    | chr1  | 0.830545424 | - T2D risk | Body    |
| cg18423456 | FNIP2    | chr4  | 0.830726977 | - T2D risk | Body    |
| cg11797949 | DNAH9    | chr17 | 0.830927618 | + T2D risk | TSS200  |
| cg17963799 | ATP8A2   | chr13 | 0.830968347 | + T2D risk | Body    |
| cg07119224 | FBXL2    | chr3  | 0.831000213 | + T2D risk | Body    |
| cg14548590 | ST6GAL1  | chr3  | 0.831188279 | + T2D risk | TSS1500 |
| cg04474876 | NCOA7    | chr6  | 0.831391453 | + T2D risk | 5'UTR   |
| cg04474876 | NCOA7    | chr6  | 0.831391453 | + T2D risk | Body    |
| cg00190738 | APC      | chr5  | 0.831403872 | - T2D risk | TSS1500 |
| cg14733103 | CUX2     | chr12 | 0.831422421 | + T2D risk | Body    |
| cg09304624 | PI15     | chr8  | 0.831476902 | + T2D risk | TSS1500 |
| cg13353646 | GNA12    | chr7  | 0.831477963 | - T2D risk | Body    |
| cg13353646 | GNA12    | chr7  | 0.831477963 | - T2D risk | TSS1500 |
| cg00308222 | GLG1     | chr16 | 0.831561512 | + T2D risk | Body    |
| cg25436766 | UXS1     | chr2  | 0.831632256 | + T2D risk | Body    |
| cg21508482 | AGPAT3   | chr21 | 0.831660368 | + T2D risk | 5'UTR   |
| cg14436056 | ATP6V1H  | chr8  | 0.831772844 | - T2D risk | Body    |
| cg11481461 | RGS7     | chr1  | 0.831939503 | + T2D risk | Body    |
| cg20581632 | PCYT1A   | chr3  | 0.831977396 | + T2D risk | TSS200  |
| cg10689740 | ZHX2     | chr8  | 0.832097013 | - T2D risk | 5'UTR   |
| cg18718410 | NOTCH3   | chr19 | 0.832125448 | - T2D risk | Body    |
| cg27059302 | TANC2    | chr17 | 0.832253572 | + T2D risk | Body    |
| cg14311225 | IFT74    | chr9  | 0.83226848  | - T2D risk | 5'UTR   |
| cg04020747 | INPP4A   | chr2  | 0.832306354 | + T2D risk | Body    |
| cg24385954 | NCOA7    | chr6  | 0.83231494  | - T2D risk | 5'UTR   |
| cg24385954 | NCOA7    | chr6  | 0.83231494  | - T2D risk | Body    |
| cg03898321 | PRKCB    | chr16 | 0.832347618 | + T2D risk | Body    |
| cg12993838 | PACRG    | chr6  | 0.832400966 | - T2D risk | Body    |
| cg21143127 | KIAA1217 | chr10 | 0.832416544 | - T2D risk | Body    |
| cg20654074 | DLL4     | chr15 | 0.832468789 | + T2D risk | Body    |
| cg14350146 | CLIC5    | chr6  | 0.832482335 | + T2D risk | Body    |
| cg00279406 | ITPKB    | chr1  | 0.832789874 | - T2D risk | Body    |
| cg20859896 | ATXN1    | chr6  | 0.83284541  | - T2D risk | 5'UTR   |
| cg23497707 | APC      | chr5  | 0.832997424 | - T2D risk | 5'UTR   |
| cg19495351 | UNC80    | chr2  | 0.833053951 | + T2D risk | Body    |
| cg12669865 | ANK3     | chr10 | 0.833096872 | - T2D risk | TSS200  |
| cg12669865 | ANK3     | chr10 | 0.833096872 | - T2D risk | Body    |
| cg09658930 | MYO6     | chr6  | 0.833214925 | - T2D risk | TSS1500 |
| cg24661126 | PRKCE    | chr2  | 0.833261593 | - T2D risk | Body    |
| cg08570034 | CPLX2    | chr5  | 0.83330198  | + T2D risk | 5'UTR   |



|            |          |       |             |            |         |
|------------|----------|-------|-------------|------------|---------|
| cg14865585 | AGPAT3   | chr21 | 0.833385888 | - T2D risk | 5'UTR   |
| cg16818372 | SKAP1    | chr17 | 0.83387955  | + T2D risk | Body    |
| cg01737581 | ARID2    | chr12 | 0.833940951 | - T2D risk | TSS200  |
| cg13676849 | PRKD1    | chr14 | 0.833974316 | - T2D risk | Body    |
| cg22289810 | NF1      | chr17 | 0.833983613 | - T2D risk | TSS1500 |
| cg17613101 | RAP1GAP2 | chr17 | 0.834027714 | + T2D risk | Body    |
| cg03445435 | GALK2    | chr15 | 0.83404808  | - T2D risk | Body    |
| cg07219766 | PHF21A   | chr11 | 0.834057583 | + T2D risk | Body    |
| cg20028891 | ANK2     | chr4  | 0.834119009 | - T2D risk | 5'UTR   |
| cg11413133 | KCNJ12   | chr17 | 0.834169219 | - T2D risk | 5'UTR   |
| cg00210612 | SLC30A8  | chr8  | 0.834225221 | + T2D risk | 5'UTR   |
| cg18712514 | PTP4A2   | chr1  | 0.834248561 | + T2D risk | 5'UTR   |
| cg03624140 | APBA1    | chr9  | 0.834346522 | + T2D risk | Body    |
| cg00242233 | ARHGEF9  | chrX  | 0.834376556 | + T2D risk | Body    |
| cg10344245 | ANK2     | chr4  | 0.834461924 | + T2D risk | Body    |
| cg05944877 | PRKCB    | chr16 | 0.834475989 | - T2D risk | Body    |
| cg19136717 | ARIH1    | chr15 | 0.834613232 | + T2D risk | 5'UTR   |
| cg19136717 | ARIH1    | chr15 | 0.834613232 | + T2D risk | 1stExon |
| cg15701440 | WDR47    | chr1  | 0.834650747 | + T2D risk | 5'UTR   |
| cg15701440 | WDR47    | chr1  | 0.834650747 | + T2D risk | 1stExon |
| cg21504240 | KCNJ12   | chr17 | 0.834756123 | + T2D risk | TSS1500 |
| cg05165989 | ASXL2    | chr2  | 0.834774113 | - T2D risk | 5'UTR   |
| cg05165989 | ASXL2    | chr2  | 0.834774113 | - T2D risk | 1stExon |
| cg23329241 | ATXN1    | chr6  | 0.834869363 | - T2D risk | 5'UTR   |
| cg08547200 | PLAGL1   | chr6  | 0.834873547 | + T2D risk | 5'UTR   |
| cg03008851 | PRKD1    | chr14 | 0.834900175 | - T2D risk | Body    |
| cg02573152 | ANK3     | chr10 | 0.834930199 | - T2D risk | Body    |
| cg25318189 | GNA12    | chr7  | 0.834953078 | + T2D risk | Body    |
| cg20166548 | NF1      | chr17 | 0.834984463 | - T2D risk | Body    |
| cg05166871 | SKAP1    | chr17 | 0.835038538 | + T2D risk | Body    |
| cg01791232 | KREMEN1  | chr22 | 0.835060742 | - T2D risk | Body    |
| cg11552773 | KIAA0355 | chr19 | 0.835108328 | + T2D risk | 3'UTR   |
| cg05729743 | PACRG    | chr6  | 0.83521933  | - T2D risk | Body    |
| cg17142149 | RCAN2    | chr6  | 0.835221254 | + T2D risk | Body    |
| cg02372271 | CHID1    | chr11 | 0.835450299 | - T2D risk | Body    |
| cg18272307 | RNF157   | chr17 | 0.835507396 | + T2D risk | Body    |
| cg18698096 | PLEKHG3  | chr14 | 0.835655724 | - T2D risk | 5'UTR   |
| cg22904179 | ERC2     | chr3  | 0.835720601 | - T2D risk | 3'UTR   |
| cg13808500 | NF1      | chr17 | 0.835727184 | + T2D risk | Body    |
| cg26376835 | PACS2    | chr14 | 0.835925514 | + T2D risk | Body    |
| cg22589844 | ARID2    | chr12 | 0.836072764 | + T2D risk | Body    |
| cg02580528 | SMG7     | chr1  | 0.836113561 | + T2D risk | TSS1500 |
| cg15778350 | NUF2     | chr1  | 0.836131015 | + T2D risk | 5'UTR   |
| cg15778350 | NUF2     | chr1  | 0.836131015 | + T2D risk | 1stExon |
| cg14710896 | KIAA1217 | chr10 | 0.836200717 | + T2D risk | Body    |
| cg08694050 | ATP6V1A  | chr3  | 0.836371128 | + T2D risk | 5'UTR   |
| cg12937636 | TBC1D5   | chr3  | 0.836456924 | + T2D risk | Body    |
| cg07995924 | CTR9     | chr11 | 0.836528102 | - T2D risk | TSS1500 |
| cg04141008 | CREBBP   | chr16 | 0.836626201 | + T2D risk | Body    |
| cg13323828 | DIP2C    | chr10 | 0.836645165 | + T2D risk | Body    |
| cg23141689 | KIAA0355 | chr19 | 0.836750104 | + T2D risk | 5'UTR   |
| cg22902550 | SPOCK1   | chr5  | 0.836753958 | + T2D risk | Body    |
| cg04680247 | ASXL2    | chr2  | 0.83717473  | + T2D risk | Body    |
| cg27477079 | KCNJ18   | chr17 | 0.837182075 | + T2D risk | TSS1500 |
| cg27477079 | KCNJ12   | chr17 | 0.837182075 | + T2D risk | 5'UTR   |
| cg15562444 | PDE3A    | chr12 | 0.837188235 | + T2D risk | Body    |
| cg05655742 | COX6A1   | chr12 | 0.837198344 | - T2D risk | TSS200  |
| cg10345930 | HMBX1    | chr8  | 0.837485932 | - T2D risk | Body    |
| cg18115406 | LMX1B    | chr9  | 0.837531452 | + T2D risk | TSS200  |
| cg14343446 | NCOA7    | chr6  | 0.837553725 | + T2D risk | Body    |
| cg05274128 | ASH1L    | chr1  | 0.837618732 | - T2D risk | Body    |
| cg06768138 | ARPP19   | chr15 | 0.837818656 | - T2D risk | Body    |
| cg01996082 | DIP2C    | chr10 | 0.837908055 | + T2D risk | Body    |
| cg13412433 | TJP1     | chr15 | 0.838007491 | + T2D risk | TSS1500 |
| cg13412433 | TJP1     | chr15 | 0.838007491 | + T2D risk | Body    |
| cg26708220 | MEIS2    | chr15 | 0.838010029 | - T2D risk | Body    |
| cg03264728 | RHBDD1   | chr2  | 0.838043884 | - T2D risk | Body    |
| cg25033325 | TMEM131  | chr2  | 0.83806497  | + T2D risk | TSS1500 |
| cg00437794 | TAB2     | chr6  | 0.838095255 | + T2D risk | 5'UTR   |
| cg00437794 | TAB2     | chr6  | 0.838095255 | + T2D risk | Body    |



|            |          |       |             |            |         |
|------------|----------|-------|-------------|------------|---------|
| cg05786241 | CNTROB   | chr17 | 0.838223751 | - T2D risk | Body    |
| cg13939640 | RNF217   | chr6  | 0.838335087 | - T2D risk | TSS1500 |
| cg13939640 | RNF217   | chr6  | 0.838335087 | - T2D risk | Body    |
| cg07427926 | WWP2     | chr16 | 0.838335357 | - T2D risk | Body    |
| cg17296165 | SPPL2A   | chr15 | 0.838358823 | + T2D risk | Body    |
| cg09015385 | NCOA7    | chr6  | 0.838371037 | + T2D risk | TSS200  |
| cg09015385 | NCOA7    | chr6  | 0.838371037 | + T2D risk | Body    |
| cg05941998 | KIAA1217 | chr10 | 0.838433147 | + T2D risk | 5'UTR   |
| cg07409227 | RHOA     | chr3  | 0.838546677 | + T2D risk | 5'UTR   |
| cg04701243 | CDK8     | chr13 | 0.83859748  | + T2D risk | TSS1500 |
| cg18016034 | ANK3     | chr10 | 0.838623799 | - T2D risk | 1stExon |
| cg18016034 | ANK3     | chr10 | 0.838623799 | - T2D risk | 5'UTR   |
| cg18016034 | ANK3     | chr10 | 0.838623799 | - T2D risk | Body    |
| cg06638568 | PACRG    | chr6  | 0.83869407  | + T2D risk | Body    |
| cg12110710 | GALK2    | chr15 | 0.83899833  | + T2D risk | Body    |
| cg06700061 | NCOA7    | chr6  | 0.839002875 | - T2D risk | 5'UTR   |
| cg26911562 | EIF4EBP3 | chr5  | 0.839096032 | - T2D risk | TSS200  |
| cg16322388 | TSHZ1    | chr18 | 0.839265166 | - T2D risk | 5'UTR   |
| cg16322388 | TSHZ1    | chr18 | 0.839265166 | - T2D risk | Body    |
| cg24836396 | ASH1L    | chr1  | 0.839329803 | + T2D risk | Body    |
| cg13662195 | TAB2     | chr6  | 0.839428865 | - T2D risk | TSS1500 |
| cg13662195 | TAB2     | chr6  | 0.839428865 | - T2D risk | Body    |
| cg13566648 | PHACTR1  | chr6  | 0.83944371  | + T2D risk | Body    |
| cg02437464 | SRPK2    | chr7  | 0.839492422 | + T2D risk | Body    |
| cg22960449 | ARL15    | chr5  | 0.83990723  | + T2D risk | Body    |
| cg23071947 | NCOA7    | chr6  | 0.839978222 | - T2D risk | 5'UTR   |
| cg23071947 | NCOA7    | chr6  | 0.839978222 | - T2D risk | Body    |
| cg15934141 | PACS2    | chr14 | 0.840104997 | - T2D risk | 5'UTR   |
| cg15934141 | PACS2    | chr14 | 0.840104997 | - T2D risk | Body    |
| cg26983360 | ASH1L    | chr1  | 0.840136642 | - T2D risk | Body    |
| cg20024816 | PRKCE    | chr2  | 0.840181442 | + T2D risk | Body    |
| cg13424617 | MYO6     | chr6  | 0.840187588 | + T2D risk | 5'UTR   |
| cg00915206 | GAD1     | chr2  | 0.840349249 | + T2D risk | 1stExon |
| cg00915206 | GAD1     | chr2  | 0.840349249 | + T2D risk | 5'UTR   |
| cg10585510 | CLIC5    | chr6  | 0.840369879 | - T2D risk | Body    |
| cg06734250 | NOL4     | chr18 | 0.840471615 | - T2D risk | Body    |
| cg13566979 | TBC1D5   | chr3  | 0.840509877 | - T2D risk | 5'UTR   |
| cg04887675 | COL4A1   | chr13 | 0.840938995 | + T2D risk | Body    |
| cg26570448 | SLIT3    | chr5  | 0.841048511 | - T2D risk | TSS1500 |
| cg09392443 | GAD1     | chr2  | 0.841058201 | + T2D risk | TSS1500 |
| cg14006005 | PICALM   | chr11 | 0.841089444 | - T2D risk | TSS1500 |
| cg14141459 | SRPK2    | chr7  | 0.841363515 | + T2D risk | TSS1500 |
| cg14850477 | DACH1    | chr13 | 0.84140581  | + T2D risk | Body    |
| cg22922637 | ATXN1    | chr6  | 0.841471921 | + T2D risk | 5'UTR   |
| cg26098762 | PDE7A    | chr8  | 0.841709343 | + T2D risk | Body    |
| cg06225037 | PACRG    | chr6  | 0.842020608 | - T2D risk | Body    |
| cg13845149 | NGF      | chr1  | 0.842146691 | - T2D risk | 5'UTR   |
| cg18942298 | JPH2     | chr20 | 0.842190453 | - T2D risk | Body    |
| cg15903658 | RGS7     | chr1  | 0.842285097 | + T2D risk | Body    |
| cg08746290 | SRPK2    | chr7  | 0.842395027 | + T2D risk | Body    |
| cg08944961 | CUX2     | chr12 | 0.842515727 | - T2D risk | Body    |
| cg12177222 | ANKHD1   | chr5  | 0.842655674 | - T2D risk | Body    |
| cg13851956 | RET      | chr10 | 0.842707644 | - T2D risk | TSS200  |
| cg06846733 | SCGN     | chr6  | 0.842843309 | + T2D risk | Body    |
| cg13332359 | SCGN     | chr6  | 0.842883202 | + T2D risk | Body    |
| cg08587444 | PRKCE    | chr2  | 0.842895364 | - T2D risk | Body    |
| cg03340365 | DIP2C    | chr10 | 0.842923347 | + T2D risk | Body    |
| cg08271180 | EFR3A    | chr8  | 0.843057127 | + T2D risk | Body    |
| cg06559874 | SPAG9    | chr17 | 0.843089357 | + T2D risk | TSS200  |
| cg15727759 | DIP2C    | chr10 | 0.843176153 | - T2D risk | Body    |
| cg08161001 | ITGB1    | chr10 | 0.843323654 | + T2D risk | TSS1500 |
| cg08161001 | ITGB1    | chr10 | 0.843323654 | + T2D risk | 5'UTR   |
| cg02420943 | INPP4A   | chr2  | 0.843440424 | - T2D risk | 5'UTR   |
| cg07901839 | WIZ      | chr19 | 0.843560521 | - T2D risk | Body    |
| cg20098875 | KDM4B    | chr19 | 0.843605953 | + T2D risk | Body    |
| cg18404559 | PRKAG2   | chr7  | 0.843633698 | - T2D risk | Body    |
| cg02904779 | ATP2B1   | chr12 | 0.843656729 | - T2D risk | TSS1500 |
| cg12041213 | POC1B    | chr12 | 0.843677826 | - T2D risk | Body    |
| cg05257483 | AGPAT3   | chr21 | 0.843689614 | - T2D risk | 5'UTR   |
| cg17651625 | ACTN4    | chr19 | 0.843858757 | + T2D risk | Body    |



|            |          |       |             |            |         |
|------------|----------|-------|-------------|------------|---------|
| cg08732418 | DLL4     | chr15 | 0.844013912 | - T2D risk | Body    |
| cg12106634 | NPAT     | chr11 | 0.844019438 | - T2D risk | Body    |
| cg07700603 | AMD1     | chr6  | 0.844089745 | - T2D risk | 5'UTR   |
| cg09362918 | CNTNAP2  | chr7  | 0.844108031 | - T2D risk | Body    |
| cg00950947 | DIP2C    | chr10 | 0.844131669 | + T2D risk | Body    |
| cg26201109 | ERC2     | chr3  | 0.844563803 | - T2D risk | Body    |
| cg02006099 | PLAGL1   | chr6  | 0.844610609 | - T2D risk | 5'UTR   |
| cg06835752 | KIAA1217 | chr10 | 0.844657766 | + T2D risk | Body    |
| cg00769520 | ST8SIA1  | chr12 | 0.844699182 | + T2D risk | TSS1500 |
| cg21288249 | WWP2     | chr16 | 0.844700845 | + T2D risk | 5'UTR   |
| cg21288249 | WWP2     | chr16 | 0.844700845 | + T2D risk | Body    |
| cg19597230 | FARSB    | chr2  | 0.844725395 | + T2D risk | Body    |
| cg12977317 | SCAF8    | chr6  | 0.844751837 | + T2D risk | Body    |
| cg09719580 | COL4A1   | chr13 | 0.844752001 | - T2D risk | Body    |
| cg26034624 | MEIS2    | chr15 | 0.844808676 | + T2D risk | Body    |
| cg00455216 | TOX3     | chr16 | 0.844910869 | - T2D risk | 5'UTR   |
| cg00455216 | TOX3     | chr16 | 0.844910869 | - T2D risk | Body    |
| cg00313642 | PCYT1A   | chr3  | 0.845133483 | + T2D risk | TSS200  |
| cg00776381 | EVI5     | chr1  | 0.845245705 | + T2D risk | Body    |
| cg26781797 | DYNC1I2  | chr2  | 0.845253306 | - T2D risk | Body    |
| cg26529376 | KCNIP3   | chr2  | 0.845293    | + T2D risk | Body    |
| cg26529376 | KCNIP3   | chr2  | 0.845293    | + T2D risk | TSS1500 |
| cg13541882 | RNF157   | chr17 | 0.845311949 | + T2D risk | Body    |
| cg19012384 | PPP1R12A | chr12 | 0.845407023 | - T2D risk | Body    |
| cg18264803 | ACSS2    | chr20 | 0.845484853 | + T2D risk | Body    |
| cg18264803 | ACSS2    | chr20 | 0.845484853 | + T2D risk | 5'UTR   |
| cg18264803 | ACSS2    | chr20 | 0.845484853 | + T2D risk | 1stExon |
| cg20123403 | COL4A1   | chr13 | 0.845486567 | - T2D risk | Body    |
| cg03787245 | CUX1     | chr7  | 0.845625838 | + T2D risk | Body    |
| cg04595004 | CRYL1    | chr13 | 0.845643195 | + T2D risk | Body    |
| cg12552823 | NCOA2    | chr8  | 0.845768237 | - T2D risk | 5'UTR   |
| cg21911584 | ACTN4    | chr19 | 0.845841143 | + T2D risk | Body    |
| cg26982181 | PACRG    | chr6  | 0.845949865 | - T2D risk | Body    |
| cg20360704 | ANK2     | chr4  | 0.845964212 | - T2D risk | TSS200  |
| cg08354567 | SPOCK1   | chr5  | 0.845987585 | - T2D risk | Body    |
| cg03973705 | PRKCB    | chr16 | 0.84602776  | - T2D risk | Body    |
| cg04392320 | LMX1B    | chr9  | 0.846086782 | + T2D risk | TSS1500 |
| cg26924465 | ITGA1    | chr5  | 0.846116234 | - T2D risk | Body    |
| cg06272611 | FLT1     | chr13 | 0.846137945 | + T2D risk | Body    |
| cg22755301 | SCAF11   | chr12 | 0.846304405 | - T2D risk | Body    |
| cg11978881 | ULK4     | chr3  | 0.846658985 | + T2D risk | Body    |
| cg01560122 | TSC22D1  | chr13 | 0.846675503 | - T2D risk | 1stExon |
| cg01560122 | TSC22D1  | chr13 | 0.846675503 | - T2D risk | 5'UTR   |
| cg01560122 | TSC22D1  | chr13 | 0.846675503 | - T2D risk | Body    |
| cg06493166 | PLAGL1   | chr6  | 0.846690794 | - T2D risk | TSS1500 |
| cg00015791 | NOL4     | chr18 | 0.84680898  | + T2D risk | 5'UTR   |
| cg00015791 | NOL4     | chr18 | 0.84680898  | + T2D risk | Body    |
| cg00015791 | NOL4     | chr18 | 0.84680898  | + T2D risk | 1stExon |
| cg04112969 | INPP4A   | chr2  | 0.846889457 | - T2D risk | Body    |
| cg15050139 | ITPKB    | chr1  | 0.846971809 | - T2D risk | Body    |
| cg06857898 | CUX2     | chr12 | 0.847101218 | + T2D risk | Body    |
| cg10470524 | GALK2    | chr15 | 0.847160601 | + T2D risk | Body    |
| cg10470524 | GALK2    | chr15 | 0.847160601 | + T2D risk | TSS200  |
| cg17019616 | SKAP1    | chr17 | 0.847238386 | + T2D risk | Body    |
| cg13935270 | HMBBOX1  | chr8  | 0.847495489 | + T2D risk | 5'UTR   |
| cg14654822 | WDR47    | chr1  | 0.847566428 | + T2D risk | TSS200  |
| cg11328270 | RTN4     | chr2  | 0.847734326 | + T2D risk | Body    |
| cg13456960 | KDM4B    | chr19 | 0.847750563 | - T2D risk | Body    |
| cg04998423 | ATXN1    | chr6  | 0.84783155  | - T2D risk | 5'UTR   |
| cg23525657 | ANKHD1   | chr5  | 0.847832247 | - T2D risk | Body    |
| cg11650874 | CHID1    | chr11 | 0.847991304 | + T2D risk | 5'UTR   |
| cg12789951 | GRK5     | chr10 | 0.847997096 | + T2D risk | TSS1500 |
| cg03740132 | CNTNAP2  | chr7  | 0.848249748 | + T2D risk | Body    |
| cg26510027 | MMS19    | chr10 | 0.848363705 | - T2D risk | TSS1500 |
| cg15215077 | MAN1A1   | chr6  | 0.848565621 | + T2D risk | Body    |
| cg04737350 | PPP1R12A | chr12 | 0.848643401 | + T2D risk | Body    |
| cg08416875 | MAN1A1   | chr6  | 0.848908376 | - T2D risk | Body    |
| cg24076515 | ATXN1    | chr6  | 0.848934053 | - T2D risk | 5'UTR   |
| cg08823305 | ATRN     | chr20 | 0.84899613  | - T2D risk | TSS1500 |
| cg02054390 | ERC2     | chr3  | 0.849549526 | + T2D risk | Body    |



|            |          |       |             |            |         |
|------------|----------|-------|-------------|------------|---------|
| cg16906456 | SLC7A2   | chr8  | 0.849666113 | + T2D risk | 5'UTR   |
| cg16906456 | SLC7A2   | chr8  | 0.849666113 | + T2D risk | TSS1500 |
| cg18472392 | KCNIP3   | chr2  | 0.84974746  | - T2D risk | Body    |
| cg09762515 | CUX1     | chr7  | 0.849930773 | - T2D risk | Body    |
| cg19137098 | CHFR     | chr12 | 0.850097027 | - T2D risk | 5'UTR   |
| cg03840678 | WWP2     | chr16 | 0.850225835 | + T2D risk | 3'UTR   |
| cg26341283 | PRKAG2   | chr7  | 0.850379836 | - T2D risk | 5'UTR   |
| cg26341283 | PRKAG2   | chr7  | 0.850379836 | - T2D risk | Body    |
| cg07869135 | ZHX2     | chr8  | 0.850382362 | - T2D risk | 5'UTR   |
| cg07665134 | DIP2C    | chr10 | 0.850411122 | - T2D risk | Body    |
| cg14164032 | MET      | chr7  | 0.850466728 | + T2D risk | 3'UTR   |
| cg12376289 | MTHFS    | chr15 | 0.850525456 | - T2D risk | Body    |
| cg12376289 | MTHFS    | chr15 | 0.850525456 | - T2D risk | 3'UTR   |
| cg02130040 | LMCD1    | chr3  | 0.850627754 | - T2D risk | 5'UTR   |
| cg02130040 | LMCD1    | chr3  | 0.850627754 | - T2D risk | 1stExon |
| cg22601415 | ANK3     | chr10 | 0.850660895 | + T2D risk | TSS200  |
| cg22601415 | ANK3     | chr10 | 0.850660895 | + T2D risk | Body    |
| cg16931969 | ANK2     | chr4  | 0.850783036 | - T2D risk | Body    |
| cg10735623 | ZHX2     | chr8  | 0.850793994 | + T2D risk | 5'UTR   |
| cg25600766 | ST8SIA1  | chr12 | 0.850920369 | + T2D risk | Body    |
| cg06069278 | SLC7A2   | chr8  | 0.850927093 | + T2D risk | 5'UTR   |
| cg20135031 | ANK3     | chr10 | 0.851139866 | - T2D risk | TSS1500 |
| cg25554716 | UBE2K    | chr4  | 0.851170503 | + T2D risk | Body    |
| cg27125203 | PDE7A    | chr8  | 0.851282962 | + T2D risk | TSS1500 |
| cg18863912 | AGPAT3   | chr21 | 0.851370485 | - T2D risk | 5'UTR   |
| cg07729875 | CUX2     | chr12 | 0.85138133  | - T2D risk | Body    |
| cg14341467 | GRK5     | chr10 | 0.851387547 | + T2D risk | Body    |
| cg02924237 | ATRNL1   | chr10 | 0.851412212 | - T2D risk | ExonBnd |
| cg02924237 | ATRNL1   | chr10 | 0.851412212 | - T2D risk | Body    |
| cg03151747 | LAMA4    | chr6  | 0.851427931 | - T2D risk | Body    |
| cg04221159 | RGS7     | chr1  | 0.85156522  | + T2D risk | 5'UTR   |
| cg21249366 | LMX1B    | chr9  | 0.851574212 | + T2D risk | Body    |
| cg22563672 | PACS2    | chr14 | 0.851938493 | + T2D risk | Body    |
| cg00380376 | SH3GL2   | chr9  | 0.851983894 | - T2D risk | Body    |
| cg00153934 | LCA5     | chr6  | 0.852039797 | + T2D risk | TSS200  |
| cg16942135 | DIP2C    | chr10 | 0.852059022 | + T2D risk | Body    |
| cg21119678 | SLIT3    | chr5  | 0.852147252 | + T2D risk | Body    |
| cg05480683 | RANBP17  | chr5  | 0.852194621 | - T2D risk | Body    |
| cg09708506 | TAB2     | chr6  | 0.852277613 | - T2D risk | Body    |
| cg12848864 | NPAT     | chr11 | 0.85238094  | + T2D risk | Body    |
| cg10777666 | DIP2C    | chr10 | 0.852381016 | - T2D risk | Body    |
| cg13181164 | MEIS2    | chr15 | 0.852460569 | - T2D risk | Body    |
| cg24333406 | ATP6V1H  | chr8  | 0.852540227 | + T2D risk | TSS1500 |
| cg12903638 | UNC80    | chr2  | 0.85254229  | - T2D risk | TSS1500 |
| cg02522952 | MAN1A1   | chr6  | 0.852587363 | + T2D risk | TSS1500 |
| cg08723742 | PACRG    | chr6  | 0.852629185 | + T2D risk | Body    |
| cg01246398 | ADCY5    | chr3  | 0.852643041 | - T2D risk | Body    |
| cg19010490 | MEIS2    | chr15 | 0.852661084 | - T2D risk | Body    |
| cg06081482 | NPAT     | chr11 | 0.852716036 | + T2D risk | Body    |
| cg03126177 | MAST1    | chr19 | 0.852904833 | + T2D risk | Body    |
| cg19577074 | FAM160A1 | chr4  | 0.852978464 | + T2D risk | 5'UTR   |
| cg24150244 | TTC28    | chr22 | 0.853221605 | - T2D risk | Body    |
| cg12707024 | LYVE1    | chr11 | 0.853274892 | + T2D risk | TSS1500 |
| cg14806724 | DDC      | chr7  | 0.853327188 | - T2D risk | Body    |
| cg07132585 | PRKAG2   | chr7  | 0.853419397 | - T2D risk | Body    |
| cg00961446 | BCAT1    | chr12 | 0.853432191 | + T2D risk | Body    |
| cg10787364 | ATRNL1   | chr10 | 0.853592525 | - T2D risk | Body    |
| cg05278788 | RRAGB    | chrX  | 0.853648986 | + T2D risk | Body    |
| cg10268249 | PRKAG2   | chr7  | 0.853765426 | - T2D risk | 5'UTR   |
| cg10268249 | PRKAG2   | chr7  | 0.853765426 | - T2D risk | Body    |
| cg00954578 | HMBX1    | chr8  | 0.853766424 | + T2D risk | Body    |
| cg24418346 | CDH22    | chr20 | 0.85377671  | + T2D risk | 5'UTR   |
| cg21356460 | SPAG9    | chr17 | 0.853894498 | + T2D risk | Body    |
| cg21356460 | SPAG9    | chr17 | 0.853894498 | + T2D risk | ExonBnd |
| cg16334244 | PLAGL1   | chr6  | 0.853945078 | + T2D risk | TSS1500 |
| cg14431799 | ZHX2     | chr8  | 0.853948164 | - T2D risk | 5'UTR   |
| cg00169586 | TANC2    | chr17 | 0.853955499 | + T2D risk | Body    |
| cg09863630 | MEIS2    | chr15 | 0.854059159 | - T2D risk | Body    |
| cg01049293 | GNA12    | chr7  | 0.854188473 | - T2D risk | Body    |
| cg23023263 | ULK4     | chr3  | 0.854431436 | + T2D risk | TSS1500 |



|            |         |       |             |            |         |
|------------|---------|-------|-------------|------------|---------|
| cg26177181 | GRK5    | chr10 | 0.854493675 | + T2D risk | Body    |
| cg04039434 | DNAH9   | chr17 | 0.854607572 | - T2D risk | Body    |
| cg07224637 | MGRN1   | chr16 | 0.854649867 | - T2D risk | Body    |
| cg26517831 | GNA12   | chr7  | 0.854682457 | - T2D risk | 3'UTR   |
| cg07258524 | SSBP2   | chr5  | 0.854768984 | + T2D risk | Body    |
| cg17001408 | RGS7    | chr1  | 0.854922026 | + T2D risk | Body    |
| cg03865668 | GAD1    | chr2  | 0.854976419 | + T2D risk | 3'UTR   |
| cg18244621 | SKAP1   | chr17 | 0.85499518  | + T2D risk | Body    |
| cg00415939 | PICALM  | chr11 | 0.855000781 | + T2D risk | Body    |
| cg23937224 | CUX2    | chr12 | 0.855008898 | + T2D risk | Body    |
| cg16979981 | FBXO11  | chr2  | 0.855169949 | - T2D risk | 3'UTR   |
| cg01798352 | PACRG   | chr6  | 0.85522947  | + T2D risk | Body    |
| cg17175871 | DNAJC1  | chr10 | 0.855237384 | - T2D risk | Body    |
| cg02092248 | DNAJC1  | chr10 | 0.855399452 | - T2D risk | Body    |
| cg23706721 | ACTN4   | chr19 | 0.855459175 | - T2D risk | Body    |
| cg16007381 | TANC2   | chr17 | 0.855660416 | + T2D risk | Body    |
| cg15075267 | NOTCH3  | chr19 | 0.855835094 | + T2D risk | Body    |
| cg15797971 | TOP2A   | chr17 | 0.855856107 | + T2D risk | TSS200  |
| cg13455310 | PRKCE   | chr2  | 0.856172708 | + T2D risk | Body    |
| cg17223645 | DIP2C   | chr10 | 0.856192888 | - T2D risk | Body    |
| cg12425861 | PACS2   | chr14 | 0.856263048 | - T2D risk | Body    |
| cg01448923 | ZHX2    | chr8  | 0.856635416 | - T2D risk | TSS200  |
| cg14059145 | PRKAG2  | chr7  | 0.856651198 | - T2D risk | Body    |
| cg04175248 | HMBOX1  | chr8  | 0.856684209 | - T2D risk | 5'UTR   |
| cg14542850 | SMG7    | chr1  | 0.856830999 | - T2D risk | TSS1500 |
| cg04595854 | TENM2   | chr5  | 0.856893645 | + T2D risk | Body    |
| cg21143428 | SPOCK1  | chr5  | 0.856917586 | + T2D risk | Body    |
| cg25265205 | RANBP17 | chr5  | 0.857198172 | - T2D risk | Body    |
| cg02125219 | KCNJ12  | chr17 | 0.857222208 | - T2D risk | 5'UTR   |
| cg06591801 | ATP6V1A | chr3  | 0.857267373 | + T2D risk | 5'UTR   |
| cg20658081 | CPLX2   | chr5  | 0.857372106 | - T2D risk | 5'UTR   |
| cg08402498 | CREBBP  | chr16 | 0.857446722 | + T2D risk | Body    |
| cg15976636 | PACRG   | chr6  | 0.857512262 | - T2D risk | TSS1500 |
| cg11436027 | CALD1   | chr7  | 0.857647344 | + T2D risk | 5'UTR   |
| cg04444211 | ROBO2   | chr3  | 0.857673131 | - T2D risk | Body    |
| cg22849677 | ITPKB   | chr1  | 0.857691424 | + T2D risk | Body    |
| cg06489653 | INPP4A  | chr2  | 0.8578336   | - T2D risk | 5'UTR   |
| cg13247778 | ULK4    | chr3  | 0.857836965 | - T2D risk | Body    |
| cg23554922 | POC1B   | chr12 | 0.858014046 | + T2D risk | Body    |
| cg23554922 | POC1B   | chr12 | 0.858014046 | + T2D risk | 5'UTR   |
| cg00552888 | NCOR1   | chr17 | 0.858100137 | - T2D risk | Body    |
| cg23255694 | PACS1   | chr11 | 0.858209043 | - T2D risk | TSS1500 |
| cg13433272 | CDK8    | chr13 | 0.858293853 | - T2D risk | TSS1500 |
| cg08772927 | CLOCK   | chr4  | 0.858315047 | + T2D risk | 5'UTR   |
| cg06925530 | ATXN1   | chr6  | 0.858556823 | - T2D risk | 5'UTR   |
| cg03408115 | ZHX2    | chr8  | 0.859185842 | - T2D risk | 5'UTR   |
| cg04082532 | NGF     | chr1  | 0.859249785 | - T2D risk | 5'UTR   |
| cg26636917 | CNTNAP2 | chr7  | 0.859257455 | + T2D risk | Body    |
| cg16251794 | WWP2    | chr16 | 0.859343583 | - T2D risk | TSS1500 |
| cg16251794 | WWP2    | chr16 | 0.859343583 | - T2D risk | Body    |
| cg13289553 | SUB1    | chr5  | 0.859424553 | + T2D risk | TSS200  |
| cg05309081 | NCOR1   | chr17 | 0.859580518 | - T2D risk | Body    |
| cg24214903 | KDM4B   | chr19 | 0.859581613 | + T2D risk | Body    |
| cg19241168 | FBXL2   | chr3  | 0.859582144 | - T2D risk | TSS1500 |
| cg07191911 | ERC2    | chr3  | 0.859711065 | - T2D risk | 3'UTR   |
| cg10020569 | TPCN1   | chr12 | 0.859841215 | + T2D risk | Body    |
| cg16960797 | GRK5    | chr10 | 0.859841959 | + T2D risk | Body    |
| cg09136052 | DYNC111 | chr7  | 0.859891082 | + T2D risk | Body    |
| cg07330908 | ARL8B   | chr3  | 0.859901445 | - T2D risk | TSS200  |
| cg01000489 | PLEKHG3 | chr14 | 0.859902584 | - T2D risk | 5'UTR   |
| cg21386089 | TMEM131 | chr2  | 0.860077257 | + T2D risk | Body    |
| cg02896872 | ITPKB   | chr1  | 0.860305602 | - T2D risk | Body    |
| cg12538670 | ARL8B   | chr3  | 0.860347089 | + T2D risk | Body    |
| cg00896622 | SEC31A  | chr4  | 0.86044042  | + T2D risk | Body    |
| cg09803351 | TPCN1   | chr12 | 0.860848005 | - T2D risk | 5'UTR   |
| cg12519998 | DIP2C   | chr10 | 0.860980322 | - T2D risk | Body    |
| cg08964948 | CREBBP  | chr16 | 0.861077025 | + T2D risk | Body    |
| cg22440734 | ANK3    | chr10 | 0.861115537 | + T2D risk | 3'UTR   |
| cg02713901 | GLG1    | chr16 | 0.861171205 | + T2D risk | Body    |
| cg02713901 | GLG1    | chr16 | 0.861171205 | + T2D risk | 1stExon |



|            |          |       |             |            |         |
|------------|----------|-------|-------------|------------|---------|
| cg09903262 | UXS1     | chr2  | 0.861229732 | - T2D risk | Body    |
| cg04386751 | CDH22    | chr20 | 0.861520569 | - T2D risk | Body    |
| cg12708799 | DIP2C    | chr10 | 0.861558952 | - T2D risk | Body    |
| cg25002480 | PRKCB    | chr16 | 0.861627637 | - T2D risk | Body    |
| cg04154276 | KIAA1217 | chr10 | 0.861635671 | - T2D risk | 1stExon |
| cg04154276 | KIAA1217 | chr10 | 0.861635671 | - T2D risk | 5'UTR   |
| cg20238079 | MGRN1    | chr16 | 0.861660115 | + T2D risk | Body    |
| cg06559368 | RET      | chr10 | 0.861735587 | - T2D risk | Body    |
| cg27598794 | INPP4A   | chr2  | 0.861817059 | - T2D risk | Body    |
| cg10671987 | KDM4B    | chr19 | 0.862001173 | + T2D risk | 5'UTR   |
| cg25118631 | USP53    | chr4  | 0.862023666 | - T2D risk | Body    |
| cg00247803 | EVI5     | chr1  | 0.862120023 | + T2D risk | Body    |
| cg13898582 | SLIT3    | chr5  | 0.862189439 | - T2D risk | Body    |
| cg21634331 | MAST1    | chr19 | 0.862218396 | - T2D risk | Body    |
| cg23424146 | BCAT1    | chr12 | 0.862219119 | + T2D risk | Body    |
| cg23424146 | BCAT1    | chr12 | 0.862219119 | + T2D risk | TSS200  |
| cg23424146 | BCAT1    | chr12 | 0.862219119 | + T2D risk | TSS1500 |
| cg27427487 | KIAA1217 | chr10 | 0.862230172 | - T2D risk | Body    |
| cg27366994 | KDM4B    | chr19 | 0.862318316 | + T2D risk | Body    |
| cg16171428 | DIP2C    | chr10 | 0.862387377 | - T2D risk | Body    |
| cg12983997 | PHACTR1  | chr6  | 0.862512522 | + T2D risk | ExonBnd |
| cg12983997 | PHACTR1  | chr6  | 0.862512522 | + T2D risk | Body    |
| cg00341042 | ATRNL1   | chr10 | 0.862578585 | + T2D risk | Body    |
| cg13368786 | ACSS2    | chr20 | 0.862748155 | - T2D risk | Body    |
| cg13368786 | ACSS2    | chr20 | 0.862748155 | - T2D risk | TSS1500 |
| cg15468600 | CUX1     | chr7  | 0.862838394 | + T2D risk | Body    |
| cg20984125 | CMTR1    | chr6  | 0.862892934 | - T2D risk | Body    |
| cg07856163 | CPLX2    | chr5  | 0.862923127 | + T2D risk | TSS1500 |
| cg04893119 | PI15     | chr8  | 0.862926886 | + T2D risk | TSS1500 |
| cg17599620 | CLASP2   | chr3  | 0.862995428 | - T2D risk | Body    |
| cg20305576 | FLT1     | chr13 | 0.86304365  | + T2D risk | Body    |
| cg10129944 | PHACTR1  | chr6  | 0.863132613 | + T2D risk | 5'UTR   |
| cg04107847 | TTC28    | chr22 | 0.86335239  | + T2D risk | Body    |
| cg11410436 | TOX3     | chr16 | 0.863452576 | - T2D risk | 5'UTR   |
| cg11410436 | TOX3     | chr16 | 0.863452576 | - T2D risk | TSS1500 |
| cg23538782 | APBA1    | chr9  | 0.863546482 | + T2D risk | 5'UTR   |
| cg12791877 | DIP2C    | chr10 | 0.863583647 | + T2D risk | Body    |
| cg03639240 | PACS1    | chr11 | 0.863592306 | + T2D risk | Body    |
| cg11619524 | CLASP2   | chr3  | 0.863826556 | + T2D risk | Body    |
| cg22753668 | FLT1     | chr13 | 0.863853503 | + T2D risk | Body    |
| cg17954373 | EIF4EBP3 | chr5  | 0.863957085 | - T2D risk | TSS1500 |
| cg15147545 | ITGB1    | chr10 | 0.864393538 | - T2D risk | TSS1500 |
| cg18609236 | LMCD1    | chr3  | 0.864450011 | - T2D risk | 5'UTR   |
| cg18609236 | LMCD1    | chr3  | 0.864450011 | - T2D risk | Body    |
| cg23773983 | ATXN1    | chr6  | 0.864569331 | + T2D risk | TSS200  |
| cg24263309 | ATP6V1H  | chr8  | 0.864604843 | - T2D risk | Body    |
| cg18451156 | CHFR     | chr12 | 0.864672922 | - T2D risk | Body    |
| cg27115788 | WDR48    | chr3  | 0.864829857 | - T2D risk | Body    |
| cg04883859 | PRKCE    | chr2  | 0.864833472 | + T2D risk | Body    |
| cg11295183 | DIP2C    | chr10 | 0.864865655 | - T2D risk | Body    |
| cg11552951 | WWP2     | chr16 | 0.865087146 | + T2D risk | Body    |
| cg03640293 | SLIT3    | chr5  | 0.865088496 | - T2D risk | Body    |
| cg00027637 | ITPKB    | chr1  | 0.865093559 | - T2D risk | Body    |
| cg01748375 | CHID1    | chr11 | 0.865106696 | - T2D risk | 5'UTR   |
| cg09719124 | LMCD1    | chr3  | 0.865120378 | + T2D risk | Body    |
| cg07496016 | NQO1     | chr16 | 0.86515815  | - T2D risk | Body    |
| cg01924894 | SLC30A8  | chr8  | 0.865220696 | + T2D risk | 5'UTR   |
| cg01924894 | SLC30A8  | chr8  | 0.865220696 | + T2D risk | Body    |
| cg03085666 | NOTCH3   | chr19 | 0.865332877 | + T2D risk | Body    |
| cg20766940 | RBM4     | chr11 | 0.86537929  | - T2D risk | Body    |
| cg10093067 | NUP98    | chr11 | 0.865533421 | - T2D risk | Body    |
| cg10093067 | NUP98    | chr11 | 0.865533421 | - T2D risk | 3'UTR   |
| cg05914060 | PRMT3    | chr11 | 0.865606184 | - T2D risk | Body    |
| cg05145898 | KIAA0232 | chr4  | 0.86570962  | - T2D risk | 3'UTR   |
| cg22589568 | FARSB    | chr2  | 0.865784901 | + T2D risk | Body    |
| cg25974996 | KCNIP3   | chr2  | 0.865837077 | + T2D risk | Body    |
| cg05151055 | CREBBP   | chr16 | 0.865854298 | + T2D risk | Body    |
| cg09548990 | UBE2K    | chr4  | 0.865866665 | + T2D risk | Body    |
| cg17611936 | PRKAG2   | chr7  | 0.866207362 | + T2D risk | Body    |
| cg07462863 | NF1      | chr17 | 0.866371599 | - T2D risk | Body    |



|               |          |       |             |            |         |
|---------------|----------|-------|-------------|------------|---------|
| cg26619570    | PPP1R12A | chr12 | 0.866461494 | + T2D risk | Body    |
| cg26619570    | PPP1R12A | chr12 | 0.866461494 | + T2D risk | TSS1500 |
| cg00395277    | ATP8A1   | chr4  | 0.866565887 | - T2D risk | Body    |
| cg09025113    | ITGA1    | chr5  | 0.866686397 | + T2D risk | Body    |
| cg08388155    | RRAGB    | chrX  | 0.86687907  | + T2D risk | TSS1500 |
| cg10550387    | ANK3     | chr10 | 0.86696605  | + T2D risk | Body    |
| cg03339592    | TENM2    | chr5  | 0.866990701 | - T2D risk | Body    |
| cg20488972    | CLEC16A  | chr16 | 0.867187428 | - T2D risk | TSS1500 |
| cg10685947    | ANK2     | chr4  | 0.867443612 | + T2D risk | Body    |
| cg02185843    | AGPAT3   | chr21 | 0.867448488 | + T2D risk | 5'UTR   |
| cg07410783    | CLEC16A  | chr16 | 0.867576076 | + T2D risk | Body    |
| cg07174335    | KCNIP3   | chr2  | 0.867643615 | + T2D risk | Body    |
| cg19697530    | CADM1    | chr11 | 0.867693541 | + T2D risk | 1stExon |
| cg02717506    | ERC2     | chr3  | 0.867773578 | - T2D risk | Body    |
| cg04409081    | ATRNL1   | chr10 | 0.867839598 | - T2D risk | 3'UTR   |
| cg09731946    | AGPAT3   | chr21 | 0.867905088 | - T2D risk | 5'UTR   |
| cg00105060    | CNTNAP2  | chr7  | 0.867922116 | - T2D risk | Body    |
| cg11764735    | KIAA1109 | chr4  | 0.867940097 | - T2D risk | Body    |
| cg03400397    | SMG7     | chr1  | 0.868199094 | - T2D risk | ExonBnd |
| cg03400397    | SMG7     | chr1  | 0.868199094 | - T2D risk | Body    |
| cg11434762    | ROBO2    | chr3  | 0.868301938 | + T2D risk | Body    |
| cg21422623    | ITPKB    | chr1  | 0.86830403  | + T2D risk | Body    |
| cg07741192    | MGRN1    | chr16 | 0.86831943  | + T2D risk | Body    |
| cg05997357    | NCOA2    | chr8  | 0.86835671  | + T2D risk | Body    |
| cg27024214    | RGS7     | chr1  | 0.868418864 | + T2D risk | Body    |
| cg16431095    | HMBOX1   | chr8  | 0.868422125 | - T2D risk | TSS200  |
| cg16431095    | HMBOX1   | chr8  | 0.868422125 | - T2D risk | TSS1500 |
| cg22796115    | KIAA1217 | chr10 | 0.868426204 | - T2D risk | Body    |
| cg07870074    | DIP2C    | chr10 | 0.868427319 | + T2D risk | Body    |
| cg24351897    | GRK5     | chr10 | 0.868535391 | + T2D risk | Body    |
| cg03611826    | KIAA1217 | chr10 | 0.868662408 | + T2D risk | 1stExon |
| cg03611826    | KIAA1217 | chr10 | 0.868662408 | + T2D risk | 5'UTR   |
| cg03611826    | KIAA1217 | chr10 | 0.868662408 | + T2D risk | Body    |
| cg10494981    | DIP2C    | chr10 | 0.868671959 | + T2D risk | Body    |
| cg11194708    | PACRG    | chr6  | 0.86871557  | - T2D risk | Body    |
| cg02204363    | TENM2    | chr5  | 0.868885203 | - T2D risk | Body    |
| cg25212578    | ANK3     | chr10 | 0.868996359 | - T2D risk | Body    |
| cg07814876    | GGPS1    | chr1  | 0.869085649 | + T2D risk | 5'UTR   |
| cg00054948    | EVI5     | chr1  | 0.869127859 | + T2D risk | Body    |
| cg24420947    | SLC30A8  | chr8  | 0.869150126 | - T2D risk | 5'UTR   |
| cg17636008    | GRK5     | chr10 | 0.869279989 | - T2D risk | Body    |
| cg10366245    | MAN1A1   | chr6  | 0.869462954 | + T2D risk | Body    |
| cg14858993    | GNA12    | chr7  | 0.869465689 | - T2D risk | Body    |
| cg18784506    | ARL15    | chr5  | 0.869484247 | - T2D risk | TSS1500 |
| ch.7.3089487R | CNTNAP2  | chr7  | 0.869640784 | - T2D risk | Body    |
| cg13103606    | FAM160A1 | chr4  | 0.869654831 | - T2D risk | 5'UTR   |
| cg15793563    | CHID1    | chr11 | 0.869662417 | + T2D risk | 5'UTR   |
| cg15793563    | CHID1    | chr11 | 0.869662417 | + T2D risk | TSS200  |
| cg00049102    | DACH1    | chr13 | 0.869704008 | + T2D risk | Body    |
| cg10530950    | CLEC16A  | chr16 | 0.869746867 | - T2D risk | Body    |
| cg04920776    | POC1B    | chr12 | 0.870015344 | - T2D risk | Body    |
| cg08653328    | DIP2C    | chr10 | 0.870025345 | + T2D risk | Body    |
| cg15068227    | CNTROB   | chr17 | 0.870049538 | - T2D risk | ExonBnd |
| cg15068227    | CNTROB   | chr17 | 0.870049538 | - T2D risk | Body    |
| cg12195205    | CLEC16A  | chr16 | 0.870121531 | + T2D risk | Body    |
| cg03302008    | KCNIP3   | chr2  | 0.870175262 | + T2D risk | TSS200  |
| cg03302008    | KCNIP3   | chr2  | 0.870175262 | + T2D risk | Body    |
| cg14918958    | ANK2     | chr4  | 0.870286919 | - T2D risk | Body    |
| cg04195892    | CUX2     | chr12 | 0.870375876 | + T2D risk | Body    |
| cg26314815    | TMEM150C | chr4  | 0.87047343  | - T2D risk | TSS1500 |
| cg03207915    | MAN1A1   | chr6  | 0.870497014 | - T2D risk | Body    |
| cg12349350    | CUX1     | chr7  | 0.870506122 | + T2D risk | Body    |
| cg02224047    | CUX1     | chr7  | 0.870597116 | - T2D risk | Body    |
| cg23926526    | MDM1     | chr12 | 0.870795399 | + T2D risk | TSS1500 |
| cg26368813    | SUB1     | chr5  | 0.870868974 | - T2D risk | TSS200  |
| cg19231811    | PHACTR1  | chr6  | 0.870906189 | + T2D risk | Body    |
| cg08248849    | PLEKHG3  | chr14 | 0.870955653 | + T2D risk | 5'UTR   |
| cg26479230    | MAST1    | chr19 | 0.871095688 | - T2D risk | TSS1500 |
| cg15832436    | PACRG    | chr6  | 0.871121762 | - T2D risk | 1stExon |
| cg15832436    | PACRG    | chr6  | 0.871121762 | - T2D risk | TSS1500 |



|            |          |       |             |            |         |
|------------|----------|-------|-------------|------------|---------|
| cg15832436 | PACRG    | chr6  | 0.871121762 | - T2D risk | 5'UTR   |
| cg27319188 | PACS1    | chr11 | 0.871206329 | + T2D risk | Body    |
| cg19332302 | RRAGB    | chrX  | 0.871238393 | - T2D risk | Body    |
| cg19332302 | RRAGB    | chrX  | 0.871238393 | - T2D risk | ExonBnd |
| cg19886272 | WWP2     | chr16 | 0.871292683 | + T2D risk | TSS1500 |
| cg19886272 | WWP2     | chr16 | 0.871292683 | + T2D risk | Body    |
| cg14838600 | PRKAG2   | chr7  | 0.87129898  | + T2D risk | Body    |
| cg24770019 | NCOA7    | chr6  | 0.871401175 | - T2D risk | 5'UTR   |
| cg24770019 | NCOA7    | chr6  | 0.871401175 | - T2D risk | Body    |
| cg03336832 | MGRN1    | chr16 | 0.871486875 | + T2D risk | Body    |
| cg06779248 | DYNC111  | chr7  | 0.871544501 | + T2D risk | Body    |
| cg08841318 | RNF217   | chr6  | 0.871695965 | + T2D risk | 1stExon |
| cg04012266 | PDE3A    | chr12 | 0.871728156 | + T2D risk | 1stExon |
| cg06046147 | ARID2    | chr12 | 0.871753742 | + T2D risk | Body    |
| cg26680350 | KIAA1217 | chr10 | 0.871799693 | + T2D risk | Body    |
| cg22508930 | RAP1B    | chr12 | 0.871892931 | - T2D risk | 5'UTR   |
| cg15170139 | RAP1GAP2 | chr17 | 0.872271285 | + T2D risk | Body    |
| cg12999769 | WWP2     | chr16 | 0.872438791 | + T2D risk | Body    |
| cg02461985 | FARSB    | chr2  | 0.872469125 | + T2D risk | Body    |
| cg07912922 | PHACTR1  | chr6  | 0.872816405 | - T2D risk | Body    |
| cg22586405 | CDH22    | chr20 | 0.872905403 | + T2D risk | Body    |
| cg06393874 | SRPK2    | chr7  | 0.872907363 | + T2D risk | TSS200  |
| cg06393874 | SRPK2    | chr7  | 0.872907363 | + T2D risk | Body    |
| cg09605880 | PTP4A2   | chr1  | 0.87299918  | + T2D risk | 5'UTR   |
| cg25631092 | TBC1D5   | chr3  | 0.873126657 | + T2D risk | TSS1500 |
| cg01438802 | PICALM   | chr11 | 0.873133288 | - T2D risk | Body    |
| cg05635369 | ATRNL1   | chr10 | 0.873197043 | + T2D risk | Body    |
| cg14054343 | RTN4     | chr2  | 0.87339752  | + T2D risk | TSS200  |
| cg14054343 | RTN4     | chr2  | 0.87339752  | + T2D risk | Body    |
| cg03427191 | MGRN1    | chr16 | 0.873404688 | + T2D risk | Body    |
| cg01526547 | COL4A1   | chr13 | 0.873454246 | + T2D risk | Body    |
| cg19109955 | ACTN4    | chr19 | 0.873544881 | + T2D risk | TSS200  |
| cg06497954 | ARL8B    | chr3  | 0.873580745 | + T2D risk | Body    |
| cg14872036 | ADCY5    | chr3  | 0.873597429 | + T2D risk | Body    |
| cg23222061 | PRKAG2   | chr7  | 0.873644762 | - T2D risk | TSS200  |
| cg23222061 | PRKAG2   | chr7  | 0.873644762 | - T2D risk | Body    |
| cg24636057 | COL4A1   | chr13 | 0.873657969 | + T2D risk | Body    |
| cg05391398 | GALK2    | chr15 | 0.873734613 | - T2D risk | Body    |
| cg06143663 | CLEC16A  | chr16 | 0.873864876 | + T2D risk | Body    |
| cg26368942 | ENAH     | chr1  | 0.873874562 | - T2D risk | TSS1500 |
| cg26278487 | DNAJC1   | chr10 | 0.873975066 | + T2D risk | Body    |
| cg19095981 | ARL15    | chr5  | 0.873975925 | - T2D risk | Body    |
| cg13772849 | NF1      | chr17 | 0.874004    | - T2D risk | Body    |
| cg15845673 | BCAT1    | chr12 | 0.874110909 | - T2D risk | Body    |
| cg24688343 | TANC2    | chr17 | 0.874198749 | - T2D risk | Body    |
| cg18593303 | ATXN1    | chr6  | 0.874289441 | + T2D risk | 5'UTR   |
| cg10262188 | DIP2C    | chr10 | 0.874345892 | + T2D risk | Body    |
| cg11502597 | KIAA1217 | chr10 | 0.874354531 | - T2D risk | TSS200  |
| cg11502597 | KIAA1217 | chr10 | 0.874354531 | - T2D risk | 5'UTR   |
| cg05721077 | PACS2    | chr14 | 0.874369679 | + T2D risk | Body    |
| cg14891553 | ACTN4    | chr19 | 0.874513647 | - T2D risk | Body    |
| cg09158218 | ENAH     | chr1  | 0.874561942 | + T2D risk | Body    |
| cg10061492 | PACS2    | chr14 | 0.874630583 | + T2D risk | Body    |
| cg13176785 | PRKCE    | chr2  | 0.87479736  | + T2D risk | Body    |
| cg16963426 | MAST1    | chr19 | 0.874804375 | - T2D risk | Body    |
| cg23328493 | CUX1     | chr7  | 0.875049964 | + T2D risk | Body    |
| cg23861889 | PRKCE    | chr2  | 0.875146379 | + T2D risk | TSS1500 |
| cg13139972 | DDK2     | chr4  | 0.875233688 | - T2D risk | 1stExon |
| cg13139972 | DDK2     | chr4  | 0.875233688 | - T2D risk | 5'UTR   |
| cg10457878 | EFR3A    | chr8  | 0.87528931  | - T2D risk | Body    |
| cg04004513 | SKAP1    | chr17 | 0.875293998 | - T2D risk | Body    |
| cg02362381 | ITGA1    | chr5  | 0.875315799 | - T2D risk | TSS1500 |
| cg21694531 | SLC30A8  | chr8  | 0.875639079 | - T2D risk | Body    |
| cg00518941 | PRKCE    | chr2  | 0.875659713 | + T2D risk | Body    |
| cg01220564 | DDC      | chr7  | 0.875793404 | + T2D risk | 1stExon |
| cg01220564 | DDC      | chr7  | 0.875793404 | + T2D risk | 5'UTR   |
| cg03349134 | SCGN     | chr6  | 0.875850489 | - T2D risk | Body    |
| cg17304276 | CUX2     | chr12 | 0.875970021 | - T2D risk | Body    |
| cg04550430 | PRKCB    | chr16 | 0.876018326 | + T2D risk | Body    |
| cg24105638 | TAZ      | chrX  | 0.876193336 | - T2D risk | Body    |



|            |         |       |             |            |         |
|------------|---------|-------|-------------|------------|---------|
| cg27622633 | USP53   | chr4  | 0.876197778 | + T2D risk | TSS200  |
| cg02505121 | SLIT3   | chr5  | 0.876314769 | + T2D risk | Body    |
| cg22180298 | PACRG   | chr6  | 0.876350177 | + T2D risk | Body    |
| cg06682454 | TMEM131 | chr2  | 0.876361325 | - T2D risk | Body    |
| cg14269576 | CPLX2   | chr5  | 0.876432822 | + T2D risk | 5'UTR   |
| cg17739932 | NCOA2   | chr8  | 0.876494141 | + T2D risk | Body    |
| cg01333028 | TMEM131 | chr2  | 0.876696837 | + T2D risk | Body    |
| cg23469046 | ULK4    | chr3  | 0.876714843 | - T2D risk | TSS1500 |
| cg14725719 | RET     | chr10 | 0.876775883 | + T2D risk | Body    |
| cg05064673 | PTPRU   | chr1  | 0.877031028 | + T2D risk | TSS1500 |
| cg09076339 | ITPKB   | chr1  | 0.877048704 | + T2D risk | Body    |
| cg10769157 | AMD1    | chr6  | 0.877106417 | + T2D risk | 5'UTR   |
| cg10769157 | AMD1    | chr6  | 0.877106417 | + T2D risk | Body    |
| cg05397216 | TJP1    | chr15 | 0.877129019 | + T2D risk | Body    |
| cg27367992 | ST6GAL1 | chr3  | 0.877143287 | - T2D risk | 5'UTR   |
| cg27367992 | ST6GAL1 | chr3  | 0.877143287 | - T2D risk | TSS1500 |
| cg21924617 | ROBO2   | chr3  | 0.877238288 | - T2D risk | 5'UTR   |
| cg21924617 | ROBO2   | chr3  | 0.877238288 | - T2D risk | TSS1500 |
| cg21924617 | ROBO2   | chr3  | 0.877238288 | - T2D risk | Body    |
| cg02388371 | ATP6V1H | chr8  | 0.877292411 | - T2D risk | Body    |
| cg07478825 | CDH22   | chr20 | 0.877511823 | + T2D risk | Body    |
| cg17783697 | SEC31A  | chr4  | 0.87756225  | - T2D risk | Body    |
| cg07575501 | CUX2    | chr12 | 0.877682779 | - T2D risk | Body    |
| cg17339794 | KDM4B   | chr19 | 0.877748082 | + T2D risk | Body    |
| cg04011247 | BCAT1   | chr12 | 0.87776614  | + T2D risk | 5'UTR   |
| cg04011247 | BCAT1   | chr12 | 0.87776614  | + T2D risk | 1stExon |
| cg03425093 | GNA12   | chr7  | 0.877808925 | - T2D risk | Body    |
| cg00089101 | TMEM131 | chr2  | 0.877818076 | + T2D risk | TSS200  |
| cg12099191 | KDM4B   | chr19 | 0.877988009 | - T2D risk | Body    |
| cg04863427 | PRKAG2  | chr7  | 0.878045664 | + T2D risk | Body    |
| cg06339423 | ATP6V1H | chr8  | 0.878161575 | - T2D risk | Body    |
| cg01082843 | UNC80   | chr2  | 0.878205793 | + T2D risk | 1stExon |
| cg03764976 | NOTCH3  | chr19 | 0.878244246 | - T2D risk | Body    |
| cg06064015 | CADM1   | chr11 | 0.878340384 | - T2D risk | Body    |
| cg12989088 | TTC28   | chr22 | 0.878428934 | + T2D risk | Body    |
| cg03680680 | DIP2C   | chr10 | 0.878429535 | - T2D risk | Body    |
| cg03552522 | NUP98   | chr11 | 0.878453411 | + T2D risk | 3'UTR   |
| cg06002567 | ATXN1   | chr6  | 0.878533058 | + T2D risk | 5'UTR   |
| cg06138257 | CHFR    | chr12 | 0.8785493   | + T2D risk | 3'UTR   |
| cg04901821 | GGPS1   | chr1  | 0.87870666  | - T2D risk | 3'UTR   |
| cg01937628 | PDK1    | chr2  | 0.878887254 | - T2D risk | TSS200  |
| cg01937628 | PDK1    | chr2  | 0.878887254 | - T2D risk | TSS1500 |
| cg26562691 | PRKCB   | chr16 | 0.878889831 | - T2D risk | Body    |
| cg18965179 | CUX1    | chr7  | 0.878956853 | + T2D risk | Body    |
| cg14803394 | STX6    | chr1  | 0.879385427 | - T2D risk | TSS1500 |
| cg23168264 | MEIS2   | chr15 | 0.879533861 | - T2D risk | 5'UTR   |
| cg23168264 | MEIS2   | chr15 | 0.879533861 | - T2D risk | 1stExon |
| cg23168264 | MEIS2   | chr15 | 0.879533861 | - T2D risk | TSS1500 |
| cg01971671 | SKAP1   | chr17 | 0.879591107 | - T2D risk | Body    |
| cg03368634 | CREBBP  | chr16 | 0.879785519 | + T2D risk | Body    |
| cg13495046 | NUP98   | chr11 | 0.879919663 | - T2D risk | Body    |
| cg10258107 | DYNC111 | chr7  | 0.879998894 | - T2D risk | Body    |
| cg17710868 | MAST1   | chr19 | 0.880024247 | - T2D risk | TSS1500 |
| cg15308917 | SMG7    | chr1  | 0.8802067   | + T2D risk | Body    |
| cg03257293 | ITPKB   | chr1  | 0.880255262 | - T2D risk | TSS1500 |
| cg15481353 | NCOR1   | chr17 | 0.88026347  | - T2D risk | Body    |
| cg27167982 | EVI5    | chr1  | 0.880310803 | - T2D risk | Body    |
| cg03263637 | ZHX2    | chr8  | 0.88039599  | - T2D risk | 5'UTR   |
| cg04616529 | CLEC16A | chr16 | 0.88043381  | - T2D risk | Body    |
| cg24709257 | CADM1   | chr11 | 0.880497249 | - T2D risk | Body    |
| cg09438147 | UNC80   | chr2  | 0.88081595  | + T2D risk | TSS200  |
| cg18170689 | CUX1    | chr7  | 0.880927873 | - T2D risk | Body    |
| cg15035324 | PRKCE   | chr2  | 0.881114651 | + T2D risk | Body    |
| cg23982527 | CHID1   | chr11 | 0.881154804 | - T2D risk | Body    |
| cg14931071 | PHACTR1 | chr6  | 0.881301252 | - T2D risk | TSS200  |
| cg19384997 | CRYL1   | chr13 | 0.881356173 | - T2D risk | Body    |
| cg18407878 | DIP2C   | chr10 | 0.881429268 | + T2D risk | Body    |
| cg04356401 | CADM1   | chr11 | 0.881540665 | - T2D risk | Body    |
| cg07896099 | DIP2C   | chr10 | 0.881634708 | + T2D risk | Body    |
| cg21092551 | TJP1    | chr15 | 0.881864271 | + T2D risk | 3'UTR   |



|            |                 |       |             |            |         |
|------------|-----------------|-------|-------------|------------|---------|
| cg09885664 | <i>PDLIM5</i>   | chr4  | 0.88186631  | - T2D risk | Body    |
| cg02118424 | <i>KREMEN1</i>  | chr22 | 0.882078903 | + T2D risk | Body    |
| cg22795471 | <i>PTPRU</i>    | chr1  | 0.882139647 | - T2D risk | Body    |
| cg00345656 | <i>BIRC5</i>    | chr17 | 0.882192206 | - T2D risk | TSS1500 |
| cg12760508 | <i>AMD1</i>     | chr6  | 0.882434658 | - T2D risk | 5'UTR   |
| cg12760508 | <i>AMD1</i>     | chr6  | 0.882434658 | - T2D risk | Body    |
| cg08855484 | <i>APBA1</i>    | chr9  | 0.882458973 | + T2D risk | Body    |
| cg12028789 | <i>WWP2</i>     | chr16 | 0.882800915 | - T2D risk | 5'UTR   |
| cg05861420 | <i>KIAA1217</i> | chr10 | 0.883049817 | - T2D risk | Body    |
| cg19579652 | <i>DIP2C</i>    | chr10 | 0.883106067 | + T2D risk | Body    |
| cg08407670 | <i>CLOCK</i>    | chr4  | 0.883322897 | + T2D risk | Body    |
| cg08494793 | <i>PRKAG2</i>   | chr7  | 0.883370152 | + T2D risk | Body    |
| cg20910875 | <i>KCNJ12</i>   | chr17 | 0.883376357 | - T2D risk | 5'UTR   |
| cg10667166 | <i>FLT1</i>     | chr13 | 0.883466475 | + T2D risk | Body    |
| cg02632809 | <i>SLC29A4</i>  | chr7  | 0.883516533 | + T2D risk | Body    |
| cg19078123 | <i>RAP1GAP2</i> | chr17 | 0.883540563 | - T2D risk | Body    |
| cg23837895 | <i>LMX1B</i>    | chr9  | 0.883583907 | + T2D risk | Body    |
| cg09122989 | <i>PACS1</i>    | chr11 | 0.883695652 | - T2D risk | Body    |
| cg03555227 | <i>RANBP17</i>  | chr5  | 0.883794008 | - T2D risk | Body    |
| cg01707275 | <i>PHACTR1</i>  | chr6  | 0.883843816 | - T2D risk | Body    |
| cg20787648 | <i>SSB</i>      | chr2  | 0.883889362 | + T2D risk | TSS200  |
| cg27608981 | <i>CUX1</i>     | chr7  | 0.884197224 | - T2D risk | Body    |
| cg27647825 | <i>FNIP2</i>    | chr4  | 0.884231716 | + T2D risk | Body    |
| cg21834420 | <i>CLOCK</i>    | chr4  | 0.884336291 | - T2D risk | TSS200  |
| cg21834420 | <i>CLOCK</i>    | chr4  | 0.884336291 | - T2D risk | 5'UTR   |
| cg19118937 | <i>NGLY1</i>    | chr3  | 0.884379977 | + T2D risk | Body    |
| cg02328929 | <i>ENAH</i>     | chr1  | 0.884412562 | + T2D risk | Body    |
| cg06228645 | <i>KIAA1217</i> | chr10 | 0.884920003 | - T2D risk | Body    |
| cg25548221 | <i>CHID1</i>    | chr11 | 0.885030104 | + T2D risk | Body    |
| cg19538089 | <i>GAD1</i>     | chr2  | 0.885107309 | - T2D risk | 1stExon |
| cg19538089 | <i>GAD1</i>     | chr2  | 0.885107309 | - T2D risk | 5'UTR   |
| cg02594677 | <i>DIP2C</i>    | chr10 | 0.885134257 | + T2D risk | Body    |
| cg14072126 | <i>FBXO11</i>   | chr2  | 0.885201153 | - T2D risk | 5'UTR   |
| cg00780540 | <i>DIP2C</i>    | chr10 | 0.885245898 | + T2D risk | Body    |
| cg12696066 | <i>DDC</i>      | chr7  | 0.885262998 | - T2D risk | Body    |
| cg21505551 | <i>PACS1</i>    | chr11 | 0.88526823  | + T2D risk | Body    |
| cg13982318 | <i>APBA1</i>    | chr9  | 0.885277531 | + T2D risk | Body    |
| cg23976221 | <i>PDLIM5</i>   | chr4  | 0.885380766 | - T2D risk | Body    |
| cg03311836 | <i>ACTN4</i>    | chr19 | 0.885460851 | + T2D risk | Body    |
| cg02105641 | <i>ENAH</i>     | chr1  | 0.885557785 | - T2D risk | Body    |
| cg14350986 | <i>TPCN1</i>    | chr12 | 0.88560829  | - T2D risk | 5'UTR   |
| cg14350986 | <i>TPCN1</i>    | chr12 | 0.88560829  | - T2D risk | Body    |
| cg03874268 | <i>SEZ6L</i>    | chr22 | 0.885641829 | - T2D risk | Body    |
| cg11386711 | <i>ST6GAL1</i>  | chr3  | 0.885754736 | + T2D risk | 5'UTR   |
| cg22902223 | <i>SLIT3</i>    | chr5  | 0.885758221 | - T2D risk | Body    |
| cg25943763 | <i>ITPKB</i>    | chr1  | 0.885847663 | - T2D risk | Body    |
| cg02458318 | <i>DIP2C</i>    | chr10 | 0.885860645 | - T2D risk | Body    |
| cg05109049 | <i>NF1</i>      | chr17 | 0.886019559 | - T2D risk | Body    |
| cg04868583 | <i>ATP8A1</i>   | chr4  | 0.886034234 | - T2D risk | Body    |
| cg04639515 | <i>KDM4B</i>    | chr19 | 0.886073542 | - T2D risk | 5'UTR   |
| cg05106502 | <i>SKAP1</i>    | chr17 | 0.886098808 | - T2D risk | Body    |
| cg20688157 | <i>NOTCH3</i>   | chr19 | 0.886109491 | + T2D risk | Body    |
| cg25618198 | <i>ATP8A2</i>   | chr13 | 0.886229102 | + T2D risk | Body    |
| cg17831934 | <i>CNTNAP2</i>  | chr7  | 0.886401966 | + T2D risk | Body    |
| cg04125246 | <i>ULK4</i>     | chr3  | 0.886624499 | + T2D risk | 1stExon |
| cg04125246 | <i>ULK4</i>     | chr3  | 0.886624499 | + T2D risk | 5'UTR   |
| cg17472072 | <i>CLASP2</i>   | chr3  | 0.886664817 | - T2D risk | 1stExon |
| cg14281612 | <i>DNAH9</i>    | chr17 | 0.886756038 | + T2D risk | TSS200  |
| cg14281612 | <i>DNAH9</i>    | chr17 | 0.886756038 | + T2D risk | Body    |
| cg22027930 | <i>CNTNAP2</i>  | chr7  | 0.886823392 | - T2D risk | Body    |
| cg09005651 | <i>MGRN1</i>    | chr16 | 0.887034617 | + T2D risk | 3'UTR   |
| cg19223119 | <i>DIP2C</i>    | chr10 | 0.88703481  | - T2D risk | Body    |
| cg22129585 | <i>POC1B</i>    | chr12 | 0.887113059 | - T2D risk | TSS200  |
| cg22129585 | <i>POC1B</i>    | chr12 | 0.887113059 | - T2D risk | TSS1500 |
| cg27627210 | <i>SLIT3</i>    | chr5  | 0.887264866 | - T2D risk | Body    |
| cg07984358 | <i>KIAA1217</i> | chr10 | 0.887308458 | - T2D risk | Body    |
| cg17372101 | <i>CNTNAP2</i>  | chr7  | 0.88748475  | + T2D risk | Body    |
| cg22897215 | <i>CHID1</i>    | chr11 | 0.887538996 | - T2D risk | TSS1500 |
| cg06879394 | <i>PHACTR1</i>  | chr6  | 0.887546574 | - T2D risk | Body    |
| cg24171152 | <i>ATP2B1</i>   | chr12 | 0.887556632 | + T2D risk | TSS1500 |



|            |          |       |             |            |         |
|------------|----------|-------|-------------|------------|---------|
| cg03776181 | ANK2     | chr4  | 0.887639261 | - T2D risk | Body    |
| cg07388903 | TOP2A    | chr17 | 0.887676426 | - T2D risk | TSS200  |
| cg09950128 | TMEM219  | chr16 | 0.887804991 | - T2D risk | TSS1500 |
| cg03231326 | SEC31A   | chr4  | 0.887828904 | - T2D risk | Body    |
| cg00338702 | CHFR     | chr12 | 0.887847279 | + T2D risk | Body    |
| cg01988539 | SSBP2    | chr5  | 0.887891744 | - T2D risk | 5'UTR   |
| cg01988539 | SSBP2    | chr5  | 0.887891744 | - T2D risk | 1stExon |
| cg17250680 | RHBDD1   | chr2  | 0.887945145 | - T2D risk | Body    |
| cg14721415 | CLASP2   | chr3  | 0.88798233  | - T2D risk | Body    |
| cg26222293 | FLT1     | chr13 | 0.888061267 | - T2D risk | Body    |
| cg25764217 | GNA12    | chr7  | 0.888085084 | + T2D risk | Body    |
| cg22669822 | KDM4B    | chr19 | 0.88831817  | - T2D risk | 5'UTR   |
| cg18028711 | TSC22D1  | chr13 | 0.888350068 | + T2D risk | 1stExon |
| cg07064231 | MDM1     | chr12 | 0.888550725 | - T2D risk | Body    |
| cg18695665 | ATP8A1   | chr4  | 0.888708496 | - T2D risk | Body    |
| cg03134111 | GALK2    | chr15 | 0.88886826  | - T2D risk | Body    |
| cg13984756 | DIP2C    | chr10 | 0.889083447 | - T2D risk | Body    |
| cg03736774 | ATP8A2   | chr13 | 0.889101695 | - T2D risk | Body    |
| cg13548265 | CHKA     | chr11 | 0.88916463  | + T2D risk | TSS1500 |
| cg17963042 | CRYL1    | chr13 | 0.889181494 | + T2D risk | Body    |
| cg02430368 | SCGN     | chr6  | 0.889326083 | - T2D risk | TSS1500 |
| cg27090024 | CHKA     | chr11 | 0.889439467 | + T2D risk | TSS1500 |
| cg22471176 | RBBP6    | chr16 | 0.889450432 | - T2D risk | Body    |
| cg04180668 | PACRG    | chr6  | 0.889507076 | - T2D risk | TSS200  |
| cg04180668 | PACRG    | chr6  | 0.889507076 | - T2D risk | 5'UTR   |
| cg25788006 | ATRNL1   | chr10 | 0.889544595 | + T2D risk | Body    |
| cg12372912 | TAB2     | chr6  | 0.889567797 | - T2D risk | Body    |
| cg05384053 | TANC2    | chr17 | 0.889607711 | + T2D risk | Body    |
| cg01264399 | PRKCE    | chr2  | 0.889667081 | - T2D risk | Body    |
| cg24873377 | SCARB2   | chr4  | 0.889711289 | - T2D risk | Body    |
| cg22342922 | SLC30A8  | chr8  | 0.889864063 | + T2D risk | Body    |
| cg00392760 | CLASP2   | chr3  | 0.890115847 | - T2D risk | TSS1500 |
| cg25299676 | MET      | chr7  | 0.89012668  | - T2D risk | 5'UTR   |
| cg10279167 | CREBBP   | chr16 | 0.890132287 | + T2D risk | Body    |
| cg01101373 | KIAA0355 | chr19 | 0.890169965 | - T2D risk | 5'UTR   |
| cg20043683 | RBM4     | chr11 | 0.890265918 | - T2D risk | Body    |
| cg06715160 | WWP2     | chr16 | 0.890303322 | - T2D risk | TSS200  |
| cg06505229 | UXS1     | chr2  | 0.890304331 | - T2D risk | Body    |
| cg06254768 | ANK2     | chr4  | 0.890333185 | - T2D risk | Body    |
| cg21117653 | SRPK2    | chr7  | 0.890417822 | + T2D risk | Body    |
| cg21117653 | SRPK2    | chr7  | 0.890417822 | + T2D risk | 5'UTR   |
| cg21117653 | SRPK2    | chr7  | 0.890417822 | + T2D risk | TSS1500 |
| cg04761648 | CDK8     | chr13 | 0.890419547 | - T2D risk | Body    |
| cg20000539 | DDHD2    | chr8  | 0.890447279 | - T2D risk | 3'UTR   |
| cg24095931 | ZHX2     | chr8  | 0.89045445  | - T2D risk | 5'UTR   |
| cg05954826 | CUX1     | chr7  | 0.890498715 | + T2D risk | TSS1500 |
| cg05954826 | CUX1     | chr7  | 0.890498715 | + T2D risk | Body    |
| cg06717633 | PRKD1    | chr14 | 0.890549033 | - T2D risk | Body    |
| cg01162610 | DIP2C    | chr10 | 0.890622003 | + T2D risk | Body    |
| cg14471569 | DIP2C    | chr10 | 0.890720451 | + T2D risk | Body    |
| cg08490816 | RCAN2    | chr6  | 0.890977792 | + T2D risk | Body    |
| cg22274117 | ATXN1    | chr6  | 0.891071229 | - T2D risk | 5'UTR   |
| cg20452252 | DIP2C    | chr10 | 0.891092559 | - T2D risk | Body    |
| cg09136067 | PHACTR1  | chr6  | 0.891171808 | - T2D risk | Body    |
| cg25081985 | ATP6V1H  | chr8  | 0.89127797  | - T2D risk | TSS200  |
| cg25081985 | ATP6V1H  | chr8  | 0.89127797  | - T2D risk | TSS1500 |
| cg06709107 | CUX1     | chr7  | 0.891281653 | - T2D risk | Body    |
| cg07465602 | CDH22    | chr20 | 0.891329493 | + T2D risk | Body    |
| cg24732878 | PACS2    | chr14 | 0.891354184 | - T2D risk | Body    |
| cg05450193 | ERC2     | chr3  | 0.891456421 | - T2D risk | Body    |
| cg01186212 | ANK3     | chr10 | 0.891592454 | + T2D risk | Body    |
| cg03107235 | ATP8A2   | chr13 | 0.891600458 | + T2D risk | Body    |
| cg25291396 | LMX1B    | chr9  | 0.891733579 | + T2D risk | 5'UTR   |
| cg25291396 | LMX1B    | chr9  | 0.891733579 | + T2D risk | 1stExon |
| cg02374388 | JPH2     | chr20 | 0.891880789 | - T2D risk | Body    |
| cg14452248 | CLEC16A  | chr16 | 0.892001122 | - T2D risk | Body    |
| cg04377139 | FNIP2    | chr4  | 0.892036607 | - T2D risk | Body    |
| cg20974602 | ST6GAL1  | chr3  | 0.892039686 | - T2D risk | Body    |
| cg20974602 | ST6GAL1  | chr3  | 0.892039686 | - T2D risk | 5'UTR   |
| cg20145562 | CLIC5    | chr6  | 0.892106667 | - T2D risk | Body    |



|            |                 |       |             |            |         |
|------------|-----------------|-------|-------------|------------|---------|
| cg05341670 | <i>TMEM59</i>   | chr1  | 0.892234278 | + T2D risk | Body    |
| cg00092821 | <i>CLIC5</i>    | chr6  | 0.892364045 | - T2D risk | 1stExon |
| cg11709874 | <i>APC</i>      | chr5  | 0.89240856  | - T2D risk | Body    |
| cg13216442 | <i>COL4A1</i>   | chr13 | 0.892604124 | + T2D risk | Body    |
| cg10205895 | <i>DACH1</i>    | chr13 | 0.892705105 | + T2D risk | TSS1500 |
| cg02472348 | <i>ST8SIA1</i>  | chr12 | 0.892707844 | + T2D risk | TSS200  |
| cg05528280 | <i>DIP2C</i>    | chr10 | 0.892904948 | - T2D risk | Body    |
| cg12921396 | <i>ERC2</i>     | chr3  | 0.892947864 | - T2D risk | Body    |
| cg08463581 | <i>CHID1</i>    | chr11 | 0.892988385 | + T2D risk | Body    |
| cg07521829 | <i>NUF2</i>     | chr1  | 0.893019111 | + T2D risk | 5'UTR   |
| cg00748492 | <i>DNAJC1</i>   | chr10 | 0.893059793 | - T2D risk | Body    |
| cg19453113 | <i>ERC2</i>     | chr3  | 0.893074794 | + T2D risk | Body    |
| cg17920108 | <i>PTP4A2</i>   | chr1  | 0.89339679  | - T2D risk | Body    |
| cg01526331 | <i>KIAA1217</i> | chr10 | 0.893489477 | + T2D risk | Body    |
| cg06010326 | <i>TMEM150C</i> | chr4  | 0.893498726 | - T2D risk | 5'UTR   |
| cg09833641 | <i>TSGA10</i>   | chr2  | 0.893600981 | - T2D risk | Body    |
| cg24322968 | <i>SKAP1</i>    | chr17 | 0.893624599 | + T2D risk | TSS1500 |
| cg11964762 | <i>USP53</i>    | chr4  | 0.893652793 | + T2D risk | Body    |
| cg06294954 | <i>CUX1</i>     | chr7  | 0.893737886 | + T2D risk | Body    |
| cg05688906 | <i>PDLIM5</i>   | chr4  | 0.893752637 | - T2D risk | 5'UTR   |
| cg05688906 | <i>PDLIM5</i>   | chr4  | 0.893752637 | - T2D risk | Body    |
| cg10022505 | <i>DIP2C</i>    | chr10 | 0.893988244 | - T2D risk | Body    |
| cg08810107 | <i>ATP8A2</i>   | chr13 | 0.894053599 | + T2D risk | Body    |
| cg19113920 | <i>DNAH9</i>    | chr17 | 0.8941167   | + T2D risk | Body    |
| cg17288896 | <i>LAP3</i>     | chr4  | 0.894163485 | + T2D risk | TSS1500 |
| cg24999192 | <i>SKAP1</i>    | chr17 | 0.894272493 | - T2D risk | Body    |
| cg04742029 | <i>POC1B</i>    | chr12 | 0.894585057 | + T2D risk | TSS1500 |
| cg06958882 | <i>ASH1L</i>    | chr1  | 0.8949213   | - T2D risk | Body    |
| cg07050412 | <i>LAMA4</i>    | chr6  | 0.894960486 | + T2D risk | Body    |
| cg24194093 | <i>NCOR1</i>    | chr17 | 0.89499733  | + T2D risk | Body    |
| cg24691024 | <i>MYO6</i>     | chr6  | 0.895032701 | + T2D risk | 5'UTR   |
| cg02623524 | <i>IFT74</i>    | chr9  | 0.895037663 | + T2D risk | 5'UTR   |
| cg12070337 | <i>PRKD1</i>    | chr14 | 0.895141318 | + T2D risk | Body    |
| cg20694865 | <i>TMEM131</i>  | chr2  | 0.89524014  | + T2D risk | TSS200  |
| cg23101138 | <i>DACH1</i>    | chr13 | 0.895267705 | - T2D risk | Body    |
| cg15798462 | <i>FLT1</i>     | chr13 | 0.895404622 | + T2D risk | Body    |
| cg07329149 | <i>NDUFB3</i>   | chr2  | 0.895506633 | - T2D risk | TSS200  |
| cg12914459 | <i>GAD1</i>     | chr2  | 0.895520584 | + T2D risk | Body    |
| cg27577993 | <i>PRKAG2</i>   | chr7  | 0.89561042  | + T2D risk | Body    |
| cg19581409 | <i>AGPAT3</i>   | chr21 | 0.895720336 | + T2D risk | 5'UTR   |
| cg20998753 | <i>DDC</i>      | chr7  | 0.895742623 | - T2D risk | 5'UTR   |
| cg25704289 | <i>ARPP19</i>   | chr15 | 0.895815643 | + T2D risk | Body    |
| cg06775669 | <i>CUX1</i>     | chr7  | 0.895822858 | + T2D risk | Body    |
| cg26982364 | <i>CPLX2</i>    | chr5  | 0.895870182 | + T2D risk | 5'UTR   |
| cg02749733 | <i>DYNC111</i>  | chr7  | 0.895902225 | + T2D risk | Body    |
| cg11848113 | <i>DIP2C</i>    | chr10 | 0.895904577 | - T2D risk | Body    |
| cg09413946 | <i>CLEC16A</i>  | chr16 | 0.895981574 | - T2D risk | Body    |
| cg07959956 | <i>ERC2</i>     | chr3  | 0.89600822  | + T2D risk | 5'UTR   |
| cg13789529 | <i>GRK5</i>     | chr10 | 0.896013423 | + T2D risk | Body    |
| cg15297178 | <i>WIZ</i>      | chr19 | 0.896211893 | + T2D risk | Body    |
| cg15775060 | <i>TBC1D5</i>   | chr3  | 0.896488848 | - T2D risk | Body    |
| cg12626882 | <i>DNAH9</i>    | chr17 | 0.896638715 | + T2D risk | 5'UTR   |
| cg12626882 | <i>DNAH9</i>    | chr17 | 0.896638715 | + T2D risk | 1stExon |
| cg12626882 | <i>DNAH9</i>    | chr17 | 0.896638715 | + T2D risk | Body    |
| cg03223126 | <i>CUX2</i>     | chr12 | 0.896733211 | + T2D risk | TSS1500 |
| cg18865419 | <i>KDM4B</i>    | chr19 | 0.896772668 | + T2D risk | Body    |
| cg05820243 | <i>SKAP1</i>    | chr17 | 0.897044967 | + T2D risk | Body    |
| cg00454650 | <i>ERC2</i>     | chr3  | 0.897292806 | + T2D risk | Body    |
| cg06618138 | <i>PACS1</i>    | chr11 | 0.897303958 | + T2D risk | Body    |
| cg09337852 | <i>CALD1</i>    | chr7  | 0.897376499 | - T2D risk | 1stExon |
| cg09337852 | <i>CALD1</i>    | chr7  | 0.897376499 | - T2D risk | 5'UTR   |
| cg10831479 | <i>TANC2</i>    | chr17 | 0.897426334 | - T2D risk | 3'UTR   |
| cg20389132 | <i>ADCY5</i>    | chr3  | 0.897460474 | - T2D risk | Body    |
| cg08964693 | <i>DIP2C</i>    | chr10 | 0.897485784 | - T2D risk | Body    |
| cg02660480 | <i>KIAA1217</i> | chr10 | 0.897643096 | - T2D risk | Body    |
| cg15064868 | <i>PHACTR1</i>  | chr6  | 0.897732547 | + T2D risk | Body    |
| cg02578058 | <i>UNC80</i>    | chr2  | 0.89776831  | - T2D risk | Body    |
| cg10535597 | <i>CUX2</i>     | chr12 | 0.897831602 | - T2D risk | Body    |
| cg04959423 | <i>SLIT3</i>    | chr5  | 0.897960328 | + T2D risk | Body    |
| cg05973498 | <i>NCOA2</i>    | chr8  | 0.898004105 | - T2D risk | 5'UTR   |



|            |          |       |             |            |         |
|------------|----------|-------|-------------|------------|---------|
| cg03712278 | TENM2    | chr5  | 0.898062049 | + T2D risk | Body    |
| cg18753337 | ST20     | chr15 | 0.898130644 | - T2D risk | 1stExon |
| cg18753337 | ST20     | chr15 | 0.898130644 | - T2D risk | 5'UTR   |
| cg22863620 | GRK5     | chr10 | 0.898153146 | + T2D risk | Body    |
| cg09278832 | MTHFS    | chr15 | 0.898188547 | - T2D risk | Body    |
| cg19239230 | RGS7     | chr1  | 0.898272834 | - T2D risk | 3'UTR   |
| cg26794346 | ATXN1    | chr6  | 0.898315291 | - T2D risk | 5'UTR   |
| cg00944888 | CUX1     | chr7  | 0.898395424 | - T2D risk | TSS1500 |
| cg00944888 | CUX1     | chr7  | 0.898395424 | - T2D risk | Body    |
| cg05260865 | GRK5     | chr10 | 0.898656077 | - T2D risk | Body    |
| cg25373595 | RAP1GAP2 | chr17 | 0.898661086 | + T2D risk | TSS200  |
| cg00808511 | TOX3     | chr16 | 0.898702453 | - T2D risk | Body    |
| cg01694234 | SLIT3    | chr5  | 0.898767683 | + T2D risk | Body    |
| cg16765053 | SCAF11   | chr12 | 0.898990314 | - T2D risk | 5'UTR   |
| cg22424581 | ARL15    | chr5  | 0.899125262 | - T2D risk | Body    |
| cg06697867 | MMS19    | chr10 | 0.899239837 | - T2D risk | TSS200  |
| cg06697867 | MMS19    | chr10 | 0.899239837 | - T2D risk | TSS1500 |
| cg03065383 | KCNIP3   | chr2  | 0.8992519   | + T2D risk | Body    |
| cg03065383 | KCNIP3   | chr2  | 0.8992519   | + T2D risk | TSS1500 |
| cg01882566 | RPGR     | chrX  | 0.899413157 | + T2D risk | TSS1500 |
| cg07713291 | ATXN1    | chr6  | 0.899467407 | + T2D risk | 5'UTR   |
| cg11989895 | PACS1    | chr11 | 0.899506577 | - T2D risk | Body    |
| cg17878037 | ARL15    | chr5  | 0.899522792 | - T2D risk | TSS200  |
| cg26986958 | DIP2C    | chr10 | 0.899771587 | - T2D risk | Body    |
| cg11337367 | ANK2     | chr4  | 0.899807563 | + T2D risk | Body    |
| cg04884244 | ASH1L    | chr1  | 0.899834949 | + T2D risk | Body    |
| cg03738915 | DIP2C    | chr10 | 0.899842146 | - T2D risk | Body    |
| cg12246996 | ASXL2    | chr2  | 0.899870636 | + T2D risk | Body    |
| cg06979729 | TBC1D5   | chr3  | 0.899889787 | - T2D risk | Body    |
| cg24671666 | PLEKHG3  | chr14 | 0.899903558 | + T2D risk | Body    |
| cg05970496 | RAP1GAP2 | chr17 | 0.900087519 | + T2D risk | Body    |
| cg20136009 | PPFIBP1  | chr12 | 0.900114273 | + T2D risk | 5'UTR   |
| cg06042849 | DIP2C    | chr10 | 0.90016774  | - T2D risk | Body    |
| cg06609193 | PACS1    | chr11 | 0.900210746 | - T2D risk | Body    |
| cg02163039 | PHF21A   | chr11 | 0.900216276 | - T2D risk | TSS1500 |
| cg03922340 | RHOA     | chr3  | 0.900221665 | + T2D risk | 3'UTR   |
| cg10664162 | DIP2C    | chr10 | 0.900502632 | - T2D risk | Body    |
| cg00361696 | ANKHD1   | chr5  | 0.90089099  | - T2D risk | TSS1500 |
| cg08235266 | CUX1     | chr7  | 0.900987202 | - T2D risk | 3'UTR   |
| cg12798657 | RAP1GAP2 | chr17 | 0.901146141 | + T2D risk | Body    |
| cg07386952 | PACS2    | chr14 | 0.901220036 | - T2D risk | Body    |
| cg10778104 | KIAA1217 | chr10 | 0.901322151 | + T2D risk | 5'UTR   |
| cg04086328 | ITPKB    | chr1  | 0.901345255 | + T2D risk | Body    |
| cg05932518 | SRPK2    | chr7  | 0.901346388 | + T2D risk | Body    |
| cg11494616 | TMEM131  | chr2  | 0.90160872  | + T2D risk | Body    |
| cg13936214 | SEZ6L    | chr22 | 0.901798257 | - T2D risk | TSS200  |
| cg25530246 | COL4A1   | chr13 | 0.901863841 | + T2D risk | TSS1500 |
| cg19152196 | SEZ6L    | chr22 | 0.901921911 | + T2D risk | TSS1500 |
| cg12442056 | TTC28    | chr22 | 0.901926811 | + T2D risk | Body    |
| cg17957954 | ARL15    | chr5  | 0.901944279 | - T2D risk | Body    |
| cg01242456 | ARL15    | chr5  | 0.901965979 | + T2D risk | Body    |
| cg11616283 | ASXL2    | chr2  | 0.902003202 | - T2D risk | TSS200  |
| cg08576694 | DENND4C  | chr9  | 0.902028504 | - T2D risk | Body    |
| cg08471540 | TANC2    | chr17 | 0.902316708 | - T2D risk | Body    |
| cg13320597 | TMEM219  | chr16 | 0.902412242 | + T2D risk | Body    |
| cg17541528 | COL4A1   | chr13 | 0.902414766 | - T2D risk | TSS200  |
| cg21008208 | PRKAG2   | chr7  | 0.902513321 | - T2D risk | Body    |
| cg21517458 | PDE7A    | chr8  | 0.90252524  | + T2D risk | Body    |
| cg15969263 | AGPAT3   | chr21 | 0.902542987 | + T2D risk | 5'UTR   |
| cg06747558 | PHACTR1  | chr6  | 0.902555101 | + T2D risk | Body    |
| cg17255756 | DDHD2    | chr8  | 0.902571726 | - T2D risk | Body    |
| cg06721601 | CUX1     | chr7  | 0.90258107  | + T2D risk | Body    |
| cg18457964 | NCOA7    | chr6  | 0.902646944 | + T2D risk | Body    |
| cg18457964 | NCOA7    | chr6  | 0.902646944 | + T2D risk | TSS1500 |
| cg27582333 | MGRN1    | chr16 | 0.902817834 | + T2D risk | Body    |
| cg01185093 | SLC29A4  | chr7  | 0.90285591  | + T2D risk | 3'UTR   |
| cg03595540 | NCOR1    | chr17 | 0.902913167 | - T2D risk | 5'UTR   |
| cg03595540 | NCOR1    | chr17 | 0.902913167 | - T2D risk | TSS1500 |
| cg24328884 | PRKACB   | chr1  | 0.902921218 | - T2D risk | Body    |
| cg24328884 | PRKACB   | chr1  | 0.902921218 | - T2D risk | TSS1500 |



|            |          |       |             |            |         |
|------------|----------|-------|-------------|------------|---------|
| cg04275404 | KIAA1217 | chr10 | 0.902930462 | - T2D risk | 5'UTR   |
| cg14977389 | ZHX2     | chr8  | 0.902930719 | + T2D risk | 5'UTR   |
| cg19081759 | YWHAQ    | chr2  | 0.90297227  | - T2D risk | 5'UTR   |
| cg19081759 | YWHAQ    | chr2  | 0.90297227  | - T2D risk | 1stExon |
| cg12680124 | ROBO2    | chr3  | 0.90303986  | + T2D risk | 5'UTR   |
| cg12680124 | ROBO2    | chr3  | 0.90303986  | + T2D risk | Body    |
| cg20397481 | POLA1    | chrX  | 0.903102777 | + T2D risk | Body    |
| cg01951170 | GNA12    | chr7  | 0.90318468  | - T2D risk | Body    |
| cg06497893 | FAM160A1 | chr4  | 0.903249465 | - T2D risk | 5'UTR   |
| cg20089598 | ADCY5    | chr3  | 0.9033531   | - T2D risk | Body    |
| cg01999537 | AMD1     | chr6  | 0.903365834 | + T2D risk | 5'UTR   |
| cg16244786 | SLIT3    | chr5  | 0.903399244 | - T2D risk | Body    |
| cg21756828 | CLIC5    | chr6  | 0.90347079  | - T2D risk | TSS1500 |
| cg21756828 | CLIC5    | chr6  | 0.90347079  | - T2D risk | Body    |
| cg26372949 | ARHGAP32 | chr11 | 0.903593328 | - T2D risk | Body    |
| cg25073919 | KCNIP3   | chr2  | 0.90363351  | - T2D risk | Body    |
| cg25073919 | KCNIP3   | chr2  | 0.90363351  | - T2D risk | 1stExon |
| cg08390622 | GALK2    | chr15 | 0.903640191 | - T2D risk | Body    |
| cg08390622 | GALK2    | chr15 | 0.903640191 | - T2D risk | TSS200  |
| cg17041755 | NF1      | chr17 | 0.90367095  | + T2D risk | Body    |
| cg03912060 | SH3GL2   | chr9  | 0.903757568 | + T2D risk | Body    |
| cg13058486 | NF1      | chr17 | 0.903853464 | + T2D risk | Body    |
| cg21605122 | TENM2    | chr5  | 0.903894319 | + T2D risk | Body    |
| cg00419139 | CADM1    | chr11 | 0.904002655 | - T2D risk | Body    |
| cg13169575 | CDH22    | chr20 | 0.904261818 | + T2D risk | Body    |
| cg13573626 | PACS2    | chr14 | 0.90426572  | + T2D risk | Body    |
| cg08680130 | PRKCE    | chr2  | 0.904378717 | + T2D risk | Body    |
| cg26679231 | LCA5     | chr6  | 0.904382642 | + T2D risk | 1stExon |
| cg26679231 | LCA5     | chr6  | 0.904382642 | + T2D risk | 5'UTR   |
| cg22345270 | NCOR1    | chr17 | 0.904559962 | + T2D risk | Body    |
| cg00565561 | ULK4     | chr3  | 0.904677758 | - T2D risk | Body    |
| cg09149499 | PHF21A   | chr11 | 0.904695498 | - T2D risk | Body    |
| cg24736886 | DACH1    | chr13 | 0.90491015  | + T2D risk | Body    |
| cg14209522 | AGPAT3   | chr21 | 0.904967442 | + T2D risk | Body    |
| cg01030321 | ACTN4    | chr19 | 0.905380413 | + T2D risk | Body    |
| cg04973680 | MET      | chr7  | 0.90545934  | + T2D risk | Body    |
| cg03265111 | TJP1     | chr15 | 0.905662579 | + T2D risk | Body    |
| cg20070597 | PICALM   | chr11 | 0.905700276 | + T2D risk | 1stExon |
| cg20070597 | PICALM   | chr11 | 0.905700276 | + T2D risk | 5'UTR   |
| cg12820609 | PLAGL1   | chr6  | 0.905719853 | - T2D risk | TSS200  |
| cg12820609 | PLAGL1   | chr6  | 0.905719853 | - T2D risk | TSS1500 |
| cg12820609 | PLAGL1   | chr6  | 0.905719853 | - T2D risk | 5'UTR   |
| cg25630123 | NPAT     | chr11 | 0.905850359 | - T2D risk | 3'UTR   |
| cg14466759 | CUX1     | chr7  | 0.906047989 | - T2D risk | Body    |
| cg18518909 | ATP6V1H  | chr8  | 0.906139036 | + T2D risk | 5'UTR   |
| cg18518909 | ATP6V1H  | chr8  | 0.906139036 | + T2D risk | TSS200  |
| cg16811558 | DDC      | chr7  | 0.906408729 | - T2D risk | TSS1500 |
| cg26759179 | GRK5     | chr10 | 0.906494912 | - T2D risk | Body    |
| cg09093137 | SRPK2    | chr7  | 0.90657355  | + T2D risk | Body    |
| cg18711246 | DACH1    | chr13 | 0.906593374 | + T2D risk | Body    |
| cg02740507 | TMEM59   | chr1  | 0.90661043  | - T2D risk | 5'UTR   |
| cg02740507 | TMEM59   | chr1  | 0.90661043  | - T2D risk | Body    |
| cg15184495 | CDH22    | chr20 | 0.906658195 | - T2D risk | TSS200  |
| cg12136950 | ITPKB    | chr1  | 0.906707876 | + T2D risk | Body    |
| cg02869767 | RNF157   | chr17 | 0.906728209 | + T2D risk | Body    |
| cg09046966 | SEC31A   | chr4  | 0.90692729  | - T2D risk | 5'UTR   |
| cg09046966 | SEC31A   | chr4  | 0.90692729  | - T2D risk | Body    |
| cg03255735 | ACTN4    | chr19 | 0.907021062 | - T2D risk | Body    |
| cg23764381 | ATRNL1   | chr10 | 0.907078993 | - T2D risk | TSS1500 |
| cg07489488 | DIP2C    | chr10 | 0.907099566 | - T2D risk | Body    |
| cg09817217 | PRKAG2   | chr7  | 0.907252241 | + T2D risk | Body    |
| cg09999250 | CCNB1    | chr5  | 0.907281234 | + T2D risk | TSS200  |
| cg08500084 | TPCN1    | chr12 | 0.907302832 | - T2D risk | TSS1500 |
| cg26345259 | KDM4B    | chr19 | 0.90730453  | + T2D risk | 5'UTR   |
| cg20809153 | ENAH     | chr1  | 0.907337505 | - T2D risk | Body    |
| cg08162404 | CPLX2    | chr5  | 0.907368571 | - T2D risk | 5'UTR   |
| cg02586348 | PDLIM5   | chr4  | 0.907449987 | + T2D risk | 5'UTR   |
| cg02586348 | PDLIM5   | chr4  | 0.907449987 | + T2D risk | Body    |
| cg13089810 | KREMEN1  | chr22 | 0.907546573 | - T2D risk | 3'UTR   |
| cg20923498 | INPP4A   | chr2  | 0.907560615 | + T2D risk | 5'UTR   |



|            |                |       |             |            |         |
|------------|----------------|-------|-------------|------------|---------|
| cg19647865 | <i>FLT1</i>    | chr13 | 0.90756438  | + T2D risk | Body    |
| cg24655009 | <i>KCNJ12</i>  | chr17 | 0.907582332 | - T2D risk | 5'UTR   |
| cg09071007 | <i>IFT74</i>   | chr9  | 0.907584389 | - T2D risk | 5'UTR   |
| cg26605865 | <i>DIP2C</i>   | chr10 | 0.907675808 | + T2D risk | Body    |
| cg08649501 | <i>ULK4</i>    | chr3  | 0.907713082 | - T2D risk | 5'UTR   |
| cg09870606 | <i>GLG1</i>    | chr16 | 0.907797601 | + T2D risk | TSS1500 |
| cg26884027 | <i>PTPRU</i>   | chr1  | 0.907815957 | - T2D risk | Body    |
| cg03673558 | <i>KDM4B</i>   | chr19 | 0.907835993 | + T2D risk | 5'UTR   |
| cg15443519 | <i>HMBOX1</i>  | chr8  | 0.907898668 | - T2D risk | Body    |
| cg04725433 | <i>MAN1A2</i>  | chr1  | 0.908089012 | - T2D risk | Body    |
| cg04294888 | <i>TTC28</i>   | chr22 | 0.908146403 | - T2D risk | Body    |
| cg23155066 | <i>PDLIM5</i>  | chr4  | 0.908631553 | + T2D risk | Body    |
| cg06023252 | <i>GLG1</i>    | chr16 | 0.908638255 | + T2D risk | Body    |
| cg06023252 | <i>GLG1</i>    | chr16 | 0.908638255 | + T2D risk | ExonBnd |
| cg22433284 | <i>ITPKB</i>   | chr1  | 0.908658011 | - T2D risk | Body    |
| cg11049750 | <i>ASB9</i>    | chrX  | 0.908681067 | + T2D risk | TSS1500 |
| cg10599951 | <i>RHOA</i>    | chr3  | 0.908728008 | + T2D risk | Body    |
| cg26745520 | <i>GRK5</i>    | chr10 | 0.908765203 | + T2D risk | Body    |
| cg17067190 | <i>PDE3A</i>   | chr12 | 0.908918422 | - T2D risk | TSS1500 |
| cg16531348 | <i>AGPAT3</i>  | chr21 | 0.908972246 | + T2D risk | 5'UTR   |
| cg27329507 | <i>FAM155B</i> | chrX  | 0.909157773 | - T2D risk | Body    |
| cg11672447 | <i>TSHZ1</i>   | chr18 | 0.909251548 | + T2D risk | TSS1500 |
| cg10668614 | <i>CHID1</i>   | chr11 | 0.909348107 | + T2D risk | TSS200  |
| cg00801068 | <i>COL4A1</i>  | chr13 | 0.909372205 | - T2D risk | Body    |
| cg07581120 | <i>GRK5</i>    | chr10 | 0.909397643 | + T2D risk | Body    |
| cg01123250 | <i>UNC80</i>   | chr2  | 0.909454789 | + T2D risk | Body    |
| cg18387478 | <i>ERC2</i>    | chr3  | 0.909619245 | + T2D risk | Body    |
| cg03558225 | <i>ATP8A2</i>  | chr13 | 0.909644552 | + T2D risk | Body    |
| cg12892243 | <i>NPAT</i>    | chr11 | 0.90966756  | - T2D risk | Body    |
| cg23336210 | <i>DNAJC1</i>  | chr10 | 0.909766663 | + T2D risk | Body    |
| cg00324733 | <i>NUCB2</i>   | chr11 | 0.909774042 | - T2D risk | 5'UTR   |
| cg00324733 | <i>NUCB2</i>   | chr11 | 0.909774042 | - T2D risk | 1stExon |
| cg18954339 | <i>PACS2</i>   | chr14 | 0.909789077 | + T2D risk | TSS1500 |
| cg23320300 | <i>SKAP1</i>   | chr17 | 0.909871747 | - T2D risk | Body    |
| cg10654390 | <i>SGSM2</i>   | chr17 | 0.909941883 | + T2D risk | Body    |
| cg21332304 | <i>NPEPPS</i>  | chr17 | 0.909989432 | - T2D risk | Body    |
| cg22233994 | <i>TMEM131</i> | chr2  | 0.909993451 | - T2D risk | Body    |
| cg23794377 | <i>RTN4</i>    | chr2  | 0.910143795 | - T2D risk | Body    |
| cg21279627 | <i>FBXL2</i>   | chr3  | 0.91022762  | - T2D risk | Body    |
| cg12589140 | <i>CUX2</i>    | chr12 | 0.910252155 | + T2D risk | Body    |
| cg02334092 | <i>ST6GAL1</i> | chr3  | 0.910328972 | - T2D risk | 5'UTR   |
| cg24133297 | <i>TBC1D5</i>  | chr3  | 0.910338622 | - T2D risk | 3'UTR   |
| cg17516945 | <i>DDHD2</i>   | chr8  | 0.910575591 | + T2D risk | TSS1500 |
| cg07908055 | <i>ULK4</i>    | chr3  | 0.910636362 | + T2D risk | Body    |
| cg18949641 | <i>NF1</i>     | chr17 | 0.910726699 | + T2D risk | 5'UTR   |
| cg18949641 | <i>NF1</i>     | chr17 | 0.910726699 | + T2D risk | 1stExon |
| cg25545336 | <i>FARSB</i>   | chr2  | 0.910758689 | - T2D risk | TSS200  |
| cg26420413 | <i>EVI5</i>    | chr1  | 0.910813633 | - T2D risk | Body    |
| cg01669085 | <i>ATP8A2</i>  | chr13 | 0.911013253 | - T2D risk | Body    |
| cg09962086 | <i>RTN4</i>    | chr2  | 0.911193913 | + T2D risk | Body    |
| cg09962086 | <i>RTN4</i>    | chr2  | 0.911193913 | + T2D risk | 5'UTR   |
| cg03012452 | <i>PHACTR1</i> | chr6  | 0.91120639  | + T2D risk | Body    |
| cg13137809 | <i>GNA12</i>   | chr7  | 0.911256304 | + T2D risk | 3'UTR   |
| cg10735091 | <i>CUX1</i>    | chr7  | 0.911291894 | + T2D risk | Body    |
| cg22802974 | <i>CHID1</i>   | chr11 | 0.911385984 | + T2D risk | TSS1500 |
| cg24234984 | <i>ITGB1</i>   | chr10 | 0.911701666 | + T2D risk | Body    |
| cg09507526 | <i>PRKCB</i>   | chr16 | 0.91179851  | + T2D risk | Body    |
| cg23070153 | <i>CUX2</i>    | chr12 | 0.911869699 | - T2D risk | Body    |
| cg19518046 | <i>ULK4</i>    | chr3  | 0.911984915 | - T2D risk | 5'UTR   |
| cg14446942 | <i>ITGB1</i>   | chr10 | 0.912025774 | + T2D risk | TSS1500 |
| cg26713008 | <i>BCAT1</i>   | chr12 | 0.912145032 | + T2D risk | Body    |
| cg10592667 | <i>PHF21A</i>  | chr11 | 0.912157769 | - T2D risk | Body    |
| cg26475921 | <i>SNX4</i>    | chr3  | 0.912170507 | + T2D risk | TSS1500 |
| cg02073763 | <i>PRKCE</i>   | chr2  | 0.912271744 | + T2D risk | Body    |
| cg19333507 | <i>ATRNL1</i>  | chr10 | 0.912469229 | - T2D risk | TSS1500 |
| cg26499561 | <i>POLA1</i>   | chrX  | 0.912595013 | + T2D risk | Body    |
| cg03086379 | <i>TTC28</i>   | chr22 | 0.912725082 | - T2D risk | Body    |
| cg10660498 | <i>CUX1</i>    | chr7  | 0.913014962 | - T2D risk | Body    |
| cg00100375 | <i>TENM2</i>   | chr5  | 0.91315544  | + T2D risk | Body    |
| cg06879705 | <i>TSGA10</i>  | chr2  | 0.913162948 | - T2D risk | TSS1500 |



|            |          |       |             |            |         |
|------------|----------|-------|-------------|------------|---------|
| cg04880195 | ENAH     | chr1  | 0.913412243 | - T2D risk | TSS1500 |
| cg02703404 | EFCAB14  | chr1  | 0.913444021 | - T2D risk | Body    |
| cg13063900 | PDE3A    | chr12 | 0.913581226 | - T2D risk | Body    |
| cg26203879 | GRK5     | chr10 | 0.913643595 | + T2D risk | Body    |
| cg16140493 | KREMEN1  | chr22 | 0.913792804 | + T2D risk | Body    |
| cg21631220 | ATP8A2   | chr13 | 0.91380235  | + T2D risk | Body    |
| cg03718885 | MET      | chr7  | 0.913886619 | - T2D risk | Body    |
| cg06741329 | GRK5     | chr10 | 0.913890738 | + T2D risk | Body    |
| cg23444468 | ERC2     | chr3  | 0.91407541  | - T2D risk | 5'UTR   |
| cg25940769 | PRKCE    | chr2  | 0.914090771 | - T2D risk | Body    |
| cg16174717 | ATXN1    | chr6  | 0.91413505  | + T2D risk | 5'UTR   |
| cg10659748 | ROBO2    | chr3  | 0.914166228 | - T2D risk | Body    |
| cg22395369 | ATP4A    | chr19 | 0.914258816 | - T2D risk | TSS1500 |
| cg09476325 | ITGB1    | chr10 | 0.914330253 | + T2D risk | 3'UTR   |
| cg16528638 | PRKACB   | chr1  | 0.914330935 | + T2D risk | 5'UTR   |
| cg16528638 | PRKACB   | chr1  | 0.914330935 | + T2D risk | 1stExon |
| cg16528638 | PRKACB   | chr1  | 0.914330935 | + T2D risk | Body    |
| cg27292555 | HMBX1    | chr8  | 0.91438958  | + T2D risk | 5'UTR   |
| cg08757017 | PTP4A2   | chr1  | 0.914446169 | - T2D risk | 5'UTR   |
| cg08757017 | PTP4A2   | chr1  | 0.914446169 | - T2D risk | TSS1500 |
| cg07633256 | TENM2    | chr5  | 0.914465515 | + T2D risk | Body    |
| cg21543674 | ANK3     | chr10 | 0.914508744 | + T2D risk | Body    |
| cg06245825 | PDLIM5   | chr4  | 0.914664963 | - T2D risk | 5'UTR   |
| cg06245825 | PDLIM5   | chr4  | 0.914664963 | - T2D risk | Body    |
| cg15321195 | AGPAT3   | chr21 | 0.914868377 | - T2D risk | 5'UTR   |
| cg21338479 | CUX1     | chr7  | 0.914873129 | - T2D risk | 1stExon |
| cg18737941 | PACRG    | chr6  | 0.914946842 | + T2D risk | Body    |
| cg23858094 | NOL4     | chr18 | 0.914971739 | - T2D risk | 5'UTR   |
| cg23858094 | NOL4     | chr18 | 0.914971739 | - T2D risk | Body    |
| cg08670383 | CPLX2    | chr5  | 0.914994754 | - T2D risk | 5'UTR   |
| cg23009014 | SCAF11   | chr12 | 0.915051311 | + T2D risk | Body    |
| cg09690405 | RAP1GAP2 | chr17 | 0.91505296  | - T2D risk | 3'UTR   |
| cg14521391 | PACRG    | chr6  | 0.915286392 | - T2D risk | Body    |
| cg23300586 | TSGA10   | chr2  | 0.915303372 | + T2D risk | 5'UTR   |
| cg18127395 | DYNC111  | chr7  | 0.91534638  | - T2D risk | 5'UTR   |
| cg10242494 | SCAF8    | chr6  | 0.91562137  | + T2D risk | Body    |
| cg05506008 | RAP1GAP2 | chr17 | 0.915655362 | + T2D risk | Body    |
| cg05137945 | ADCY5    | chr3  | 0.915657667 | + T2D risk | Body    |
| cg02419211 | RAP1GAP2 | chr17 | 0.915908676 | - T2D risk | Body    |
| cg15868652 | PTPRU    | chr1  | 0.915927455 | - T2D risk | Body    |
| cg08081059 | SKAP1    | chr17 | 0.915996746 | + T2D risk | Body    |
| cg18009021 | PDLIM5   | chr4  | 0.916020533 | + T2D risk | Body    |
| cg18379850 | ARPP19   | chr15 | 0.916032472 | + T2D risk | Body    |
| cg13364372 | PI15     | chr8  | 0.916062743 | - T2D risk | TSS1500 |
| cg04617596 | SLIT3    | chr5  | 0.916084882 | + T2D risk | Body    |
| cg23800778 | PACRG    | chr6  | 0.916130028 | - T2D risk | Body    |
| cg23654019 | CUX2     | chr12 | 0.916173283 | - T2D risk | Body    |
| cg11515843 | SGSM2    | chr17 | 0.916213643 | - T2D risk | Body    |
| cg02294651 | RRAGB    | chrX  | 0.916243428 | - T2D risk | Body    |
| cg07582661 | TMEM59   | chr1  | 0.91627291  | + T2D risk | Body    |
| cg26363598 | DIP2C    | chr10 | 0.916332314 | - T2D risk | Body    |
| cg18539169 | CLOCK    | chr4  | 0.916547246 | - T2D risk | 5'UTR   |
| cg23460430 | PLAGL1   | chr6  | 0.916596877 | + T2D risk | TSS1500 |
| cg23460430 | PLAGL1   | chr6  | 0.916596877 | + T2D risk | 5'UTR   |
| cg23822407 | ZHX2     | chr8  | 0.916720594 | + T2D risk | 3'UTR   |
| cg05567408 | ATXN1    | chr6  | 0.916831489 | - T2D risk | 3'UTR   |
| cg02551396 | JPH2     | chr20 | 0.916833499 | + T2D risk | 1stExon |
| cg02551396 | JPH2     | chr20 | 0.916833499 | + T2D risk | 5'UTR   |
| cg03184001 | ARL15    | chr5  | 0.916990555 | - T2D risk | Body    |
| cg02631587 | TMEM131  | chr2  | 0.917277007 | - T2D risk | Body    |
| cg01577980 | MET      | chr7  | 0.917326439 | + T2D risk | Body    |
| cg23909237 | ANK3     | chr10 | 0.917449209 | + T2D risk | Body    |
| cg06615743 | KDM4B    | chr19 | 0.917547957 | + T2D risk | Body    |
| cg27053969 | FNIP2    | chr4  | 0.917741259 | - T2D risk | Body    |
| cg17556527 | CHKA     | chr11 | 0.917922453 | + T2D risk | Body    |
| cg24064073 | RHBDD1   | chr2  | 0.918002216 | - T2D risk | Body    |
| cg19450817 | TENM2    | chr5  | 0.918200633 | + T2D risk | Body    |
| cg25971823 | ACSS2    | chr20 | 0.918336865 | - T2D risk | Body    |
| cg25971823 | ACSS2    | chr20 | 0.918336865 | - T2D risk | 3'UTR   |
| cg19412964 | PRKAG2   | chr7  | 0.918342272 | + T2D risk | Body    |



|            |                 |       |             |            |         |
|------------|-----------------|-------|-------------|------------|---------|
| cg26561148 | <i>FBXL2</i>    | chr3  | 0.91839403  | + T2D risk | TSS200  |
| cg09938978 | <i>ZDHC2</i>    | chr8  | 0.918440886 | - T2D risk | Body    |
| cg27261412 | <i>WIZ</i>      | chr19 | 0.918507071 | - T2D risk | Body    |
| cg03902160 | <i>PTPRU</i>    | chr1  | 0.918548412 | - T2D risk | Body    |
| cg13861399 | <i>RBM4</i>     | chr11 | 0.918594817 | + T2D risk | 3'UTR   |
| cg21016956 | <i>NOL4</i>     | chr18 | 0.918691004 | + T2D risk | Body    |
| cg23195522 | <i>PICALM</i>   | chr11 | 0.918691448 | - T2D risk | 5'UTR   |
| cg23195522 | <i>PICALM</i>   | chr11 | 0.918691448 | - T2D risk | Body    |
| cg22146252 | <i>KCNJ12</i>   | chr17 | 0.918752747 | - T2D risk | 5'UTR   |
| cg12399393 | <i>DIP2C</i>    | chr10 | 0.918888231 | - T2D risk | Body    |
| cg12486630 | <i>PDLIM5</i>   | chr4  | 0.918969504 | - T2D risk | 5'UTR   |
| cg12486630 | <i>PDLIM5</i>   | chr4  | 0.918969504 | - T2D risk | Body    |
| cg17043823 | <i>RSF1</i>     | chr11 | 0.918992805 | + T2D risk | Body    |
| cg09331735 | <i>DIP2C</i>    | chr10 | 0.919101924 | - T2D risk | Body    |
| cg23966705 | <i>SPAG9</i>    | chr17 | 0.919130742 | - T2D risk | TSS1500 |
| cg13343638 | <i>CLEC16A</i>  | chr16 | 0.9191986   | + T2D risk | Body    |
| cg13343638 | <i>CLEC16A</i>  | chr16 | 0.9191986   | + T2D risk | ExonBnd |
| cg00341980 | <i>PRKACB</i>   | chr1  | 0.919221132 | + T2D risk | Body    |
| cg13775636 | <i>DIP2C</i>    | chr10 | 0.919272305 | + T2D risk | Body    |
| cg25839267 | <i>ROBO2</i>    | chr3  | 0.919362923 | - T2D risk | Body    |
| cg26681889 | <i>TPCN1</i>    | chr12 | 0.919530935 | + T2D risk | Body    |
| cg17318058 | <i>DIP2C</i>    | chr10 | 0.919548534 | + T2D risk | Body    |
| cg09845387 | <i>PDE8A</i>    | chr15 | 0.919762076 | + T2D risk | 5'UTR   |
| cg09845387 | <i>PDE8A</i>    | chr15 | 0.919762076 | + T2D risk | Body    |
| cg05308498 | <i>ANK3</i>     | chr10 | 0.919825776 | + T2D risk | Body    |
| cg13833994 | <i>CDK8</i>     | chr13 | 0.919857593 | - T2D risk | TSS1500 |
| cg01782371 | <i>ATP8A2</i>   | chr13 | 0.919927338 | + T2D risk | 1stExon |
| cg01782371 | <i>ATP8A2</i>   | chr13 | 0.919927338 | + T2D risk | 5'UTR   |
| cg13199842 | <i>RGS7</i>     | chr1  | 0.91993144  | - T2D risk | Body    |
| cg27241559 | <i>GNA12</i>    | chr7  | 0.919951717 | + T2D risk | TSS200  |
| cg02255236 | <i>SLIT3</i>    | chr5  | 0.919954363 | + T2D risk | Body    |
| cg10165864 | <i>PKD1</i>     | chr2  | 0.920003691 | + T2D risk | TSS1500 |
| cg27313325 | <i>SLC29A4</i>  | chr7  | 0.920016368 | - T2D risk | 5'UTR   |
| cg26609691 | <i>CHFR</i>     | chr12 | 0.920202481 | - T2D risk | Body    |
| cg06286127 | <i>ZHX2</i>     | chr8  | 0.920478283 | + T2D risk | 3'UTR   |
| cg26153922 | <i>ANK2</i>     | chr4  | 0.920481486 | + T2D risk | Body    |
| cg05620814 | <i>GLG1</i>     | chr16 | 0.92050971  | + T2D risk | Body    |
| cg05620814 | <i>GLG1</i>     | chr16 | 0.92050971  | + T2D risk | 1stExon |
| cg17953577 | <i>DNAH9</i>    | chr17 | 0.920651514 | + T2D risk | TSS1500 |
| cg04338714 | <i>RSF1</i>     | chr11 | 0.920740286 | - T2D risk | Body    |
| cg16256373 | <i>SLC30A8</i>  | chr8  | 0.92105485  | - T2D risk | 5'UTR   |
| cg16256373 | <i>SLC30A8</i>  | chr8  | 0.92105485  | - T2D risk | 1stExon |
| cg18829521 | <i>KIAA1217</i> | chr10 | 0.921147249 | + T2D risk | TSS1500 |
| cg18829521 | <i>KIAA1217</i> | chr10 | 0.921147249 | + T2D risk | 5'UTR   |
| cg13318256 | <i>CHKA</i>     | chr11 | 0.921379162 | + T2D risk | Body    |
| cg25564485 | <i>DIP2C</i>    | chr10 | 0.921428772 | + T2D risk | Body    |
| cg07356130 | <i>CTR9</i>     | chr11 | 0.921554639 | - T2D risk | TSS1500 |
| cg10140240 | <i>BIRC5</i>    | chr17 | 0.921591937 | + T2D risk | 3'UTR   |
| cg27456203 | <i>WWP2</i>     | chr16 | 0.92166666  | - T2D risk | Body    |
| cg19194454 | <i>NQO1</i>     | chr16 | 0.921710728 | + T2D risk | TSS1500 |
| cg25956450 | <i>UXS1</i>     | chr2  | 0.921851341 | - T2D risk | TSS200  |
| cg06688790 | <i>ATP4A</i>    | chr19 | 0.921881392 | - T2D risk | TSS1500 |
| cg09354309 | <i>ST8SIA1</i>  | chr12 | 0.921887614 | - T2D risk | 1stExon |
| cg09354309 | <i>ST8SIA1</i>  | chr12 | 0.921887614 | - T2D risk | 5'UTR   |
| cg22583953 | <i>WWP2</i>     | chr16 | 0.921920431 | - T2D risk | TSS1500 |
| cg22583953 | <i>WWP2</i>     | chr16 | 0.921920431 | - T2D risk | Body    |
| cg00562504 | <i>DIP2C</i>    | chr10 | 0.922013825 | + T2D risk | Body    |
| cg16671421 | <i>ANKHD1</i>   | chr5  | 0.922129683 | + T2D risk | Body    |
| cg01643250 | <i>NOTCH3</i>   | chr19 | 0.922147386 | - T2D risk | Body    |
| cg10774361 | <i>TMEM150C</i> | chr4  | 0.922183066 | + T2D risk | TSS1500 |
| cg04226363 | <i>APC</i>      | chr5  | 0.922235492 | - T2D risk | 5'UTR   |
| cg10712934 | <i>DIP2C</i>    | chr10 | 0.922290283 | - T2D risk | Body    |
| cg03305034 | <i>CDH22</i>    | chr20 | 0.922293252 | - T2D risk | Body    |
| cg15784646 | <i>FNIP2</i>    | chr4  | 0.922314933 | - T2D risk | Body    |
| cg03614189 | <i>IMPA1</i>    | chr8  | 0.922340094 | - T2D risk | 5'UTR   |
| cg24781079 | <i>RHOQ</i>     | chr2  | 0.922493659 | + T2D risk | TSS1500 |
| cg16421726 | <i>ZRANB1</i>   | chr10 | 0.922605199 | - T2D risk | TSS1500 |
| cg04027549 | <i>STX6</i>     | chr1  | 0.922670658 | - T2D risk | 5'UTR   |
| cg04027549 | <i>STX6</i>     | chr1  | 0.922670658 | - T2D risk | 1stExon |
| cg24636003 | <i>PTPRU</i>    | chr1  | 0.922711417 | + T2D risk | Body    |



|            |           |       |             |            |         |
|------------|-----------|-------|-------------|------------|---------|
| cg24568245 | NPAT      | chr11 | 0.922760322 | + T2D risk | Body    |
| cg08605347 | DIP2C     | chr10 | 0.922806495 | + T2D risk | Body    |
| cg20816363 | DIP2C     | chr10 | 0.922907479 | + T2D risk | Body    |
| cg23390282 | ATRNL1    | chr10 | 0.922923342 | - T2D risk | Body    |
| cg07631341 | PDE8A     | chr15 | 0.92308623  | - T2D risk | 5'UTR   |
| cg07631341 | PDE8A     | chr15 | 0.92308623  | - T2D risk | TSS1500 |
| cg24434952 | RHBDD1    | chr2  | 0.923183684 | - T2D risk | Body    |
| cg22778135 | SKAP1     | chr17 | 0.923232835 | + T2D risk | Body    |
| cg04160181 | LMX1B     | chr9  | 0.92323869  | - T2D risk | Body    |
| cg07756635 | USP29     | chr19 | 0.923246847 | + T2D risk | TSS200  |
| cg12570013 | USP29     | chr19 | 0.923289005 | + T2D risk | TSS1500 |
| cg15327349 | INPP4A    | chr2  | 0.923314931 | - T2D risk | 5'UTR   |
| cg24958408 | ACTN4     | chr19 | 0.923443949 | + T2D risk | Body    |
| cg02795976 | GRK5      | chr10 | 0.923490607 | - T2D risk | Body    |
| cg08951699 | KCNIP3    | chr2  | 0.923703419 | - T2D risk | Body    |
| cg03229242 | DIP2C     | chr10 | 0.923737421 | - T2D risk | Body    |
| cg21752670 | RNF157    | chr17 | 0.923741564 | + T2D risk | Body    |
| cg25161425 | TENM2     | chr5  | 0.924018354 | - T2D risk | Body    |
| cg00942285 | NUF2      | chr1  | 0.924089715 | - T2D risk | Body    |
| cg17206054 | DIP2C     | chr10 | 0.924133144 | + T2D risk | Body    |
| cg05386697 | RSF1      | chr11 | 0.924139427 | + T2D risk | Body    |
| cg03336861 | RET       | chr10 | 0.924142481 | + T2D risk | TSS1500 |
| cg06615609 | TSHZ1     | chr18 | 0.924149708 | - T2D risk | 5'UTR   |
| cg06615609 | TSHZ1     | chr18 | 0.924149708 | - T2D risk | Body    |
| cg10184881 | PTP4A2    | chr1  | 0.924153614 | + T2D risk | TSS1500 |
| cg25761809 | KDM4B     | chr19 | 0.924232449 | + T2D risk | TSS1500 |
| cg04748213 | PRKAG2    | chr7  | 0.924493391 | - T2D risk | Body    |
| cg22557641 | DNAJC1    | chr10 | 0.924731905 | - T2D risk | Body    |
| cg19926144 | DIP2C     | chr10 | 0.924777561 | - T2D risk | Body    |
| cg25304968 | ATP6V1A   | chr3  | 0.925179608 | - T2D risk | Body    |
| cg09930648 | SLIT3     | chr5  | 0.925218086 | - T2D risk | Body    |
| cg15544877 | HNRNPA2B1 | chr7  | 0.925369992 | + T2D risk | TSS1500 |
| cg22359642 | TTC28     | chr22 | 0.925374757 | - T2D risk | Body    |
| cg16809873 | ARHGAP32  | chr11 | 0.925787564 | + T2D risk | Body    |
| cg19643442 | DYNC111   | chr7  | 0.925924577 | + T2D risk | Body    |
| cg02202612 | TANC2     | chr17 | 0.926111203 | - T2D risk | Body    |
| cg26949467 | FBXO11    | chr2  | 0.926246245 | + T2D risk | 1stExon |
| cg23338381 | HMBOX1    | chr8  | 0.926312683 | - T2D risk | 3'UTR   |
| cg14129775 | DDK1      | chr4  | 0.926350872 | - T2D risk | TSS1500 |
| cg10670187 | DACH1     | chr13 | 0.926459219 | - T2D risk | Body    |
| cg01580934 | SRPK2     | chr7  | 0.926476646 | - T2D risk | Body    |
| cg01580934 | SRPK2     | chr7  | 0.926476646 | - T2D risk | TSS1500 |
| cg26796245 | ANK2      | chr4  | 0.926569261 | - T2D risk | 1stExon |
| cg26796245 | ANK2      | chr4  | 0.926569261 | - T2D risk | 5'UTR   |
| cg26796245 | ANK2      | chr4  | 0.926569261 | - T2D risk | Body    |
| cg18101414 | CUX2      | chr12 | 0.926577392 | + T2D risk | Body    |
| cg04865553 | ADCY5     | chr3  | 0.926668773 | + T2D risk | Body    |
| cg25496129 | ZHX2      | chr8  | 0.926669075 | - T2D risk | 5'UTR   |
| cg25205423 | RBM4      | chr11 | 0.926669743 | - T2D risk | Body    |
| cg20293906 | POC1B     | chr12 | 0.926771638 | - T2D risk | 5'UTR   |
| cg20293906 | POC1B     | chr12 | 0.926771638 | - T2D risk | Body    |
| cg13663976 | NQO1      | chr16 | 0.926957462 | + T2D risk | 3'UTR   |
| cg14381568 | FLT1      | chr13 | 0.926961094 | - T2D risk | Body    |
| cg23324939 | AGPAT3    | chr21 | 0.926992483 | - T2D risk | 5'UTR   |
| cg07974987 | MTHFS     | chr15 | 0.927046041 | + T2D risk | Body    |
| cg16970851 | ST8SIA1   | chr12 | 0.927135106 | - T2D risk | TSS200  |
| cg08854451 | ANK3      | chr10 | 0.927190964 | + T2D risk | TSS1500 |
| cg08854451 | ANK3      | chr10 | 0.927190964 | + T2D risk | Body    |
| cg22369318 | CALD1     | chr7  | 0.927257965 | + T2D risk | Body    |
| cg12002997 | DNAH9     | chr17 | 0.927344562 | + T2D risk | Body    |
| cg17568885 | PACS1     | chr11 | 0.927350219 | + T2D risk | Body    |
| cg10834214 | RBBP6     | chr16 | 0.927451098 | - T2D risk | 5'UTR   |
| cg10834214 | RBBP6     | chr16 | 0.927451098 | - T2D risk | 1stExon |
| cg13433796 | BCAT1     | chr12 | 0.927472785 | + T2D risk | Body    |
| cg04381309 | PPP1R12A  | chr12 | 0.927547356 | + T2D risk | Body    |
| cg04381309 | PPP1R12A  | chr12 | 0.927547356 | + T2D risk | ExonBnd |
| cg17198320 | DIP2C     | chr10 | 0.927707895 | - T2D risk | Body    |
| cg01648226 | STX6      | chr1  | 0.927813785 | + T2D risk | TSS200  |
| cg00013759 | PRKAG2    | chr7  | 0.927898372 | + T2D risk | 5'UTR   |
| cg00013759 | PRKAG2    | chr7  | 0.927898372 | + T2D risk | Body    |



|            |          |       |             |            |         |
|------------|----------|-------|-------------|------------|---------|
| cg10016332 | SH3GL2   | chr9  | 0.928237084 | + T2D risk | TSS200  |
| cg02633884 | PICALM   | chr11 | 0.928310999 | + T2D risk | Body    |
| cg11207515 | CNTNAP2  | chr7  | 0.92839555  | + T2D risk | Body    |
| cg10005464 | ZHX2     | chr8  | 0.928562722 | + T2D risk | Body    |
| cg03359183 | DACH1    | chr13 | 0.928585243 | - T2D risk | Body    |
| cg17756094 | PDE7A    | chr8  | 0.928588688 | + T2D risk | Body    |
| cg23740067 | FBXO11   | chr2  | 0.928836602 | - T2D risk | ExonBnd |
| cg23740067 | FBXO11   | chr2  | 0.928836602 | - T2D risk | Body    |
| cg24278087 | PACS1    | chr11 | 0.928884196 | + T2D risk | Body    |
| cg15433843 | SSB      | chr2  | 0.929125105 | - T2D risk | TSS200  |
| cg15433843 | SSB      | chr2  | 0.929125105 | - T2D risk | TSS1500 |
| cg21838933 | CUL1     | chr7  | 0.929290939 | + T2D risk | Body    |
| cg01765641 | TBC1D5   | chr3  | 0.929348443 | + T2D risk | 5'UTR   |
| cg01765641 | TBC1D5   | chr3  | 0.929348443 | + T2D risk | 1stExon |
| cg10941858 | ARID2    | chr12 | 0.929418229 | + T2D risk | Body    |
| cg14883106 | PACS2    | chr14 | 0.929595064 | - T2D risk | Body    |
| cg24036689 | ATRNL    | chr20 | 0.929687756 | - T2D risk | Body    |
| cg00738815 | PRKCE    | chr2  | 0.929707166 | + T2D risk | Body    |
| cg08062011 | TMEM150C | chr4  | 0.929763908 | - T2D risk | TSS200  |
| cg12691503 | APC      | chr5  | 0.9297664   | + T2D risk | Body    |
| cg23194408 | AGPAT3   | chr21 | 0.929860331 | - T2D risk | 5'UTR   |
| cg19936497 | RSF1     | chr11 | 0.929884009 | + T2D risk | Body    |
| cg27329780 | CNTNAP2  | chr7  | 0.929936599 | + T2D risk | Body    |
| cg02913089 | PDE8A    | chr15 | 0.929938657 | - T2D risk | Body    |
| cg25530661 | CLOCK    | chr4  | 0.92995716  | - T2D risk | 3'UTR   |
| cg11989683 | PACS2    | chr14 | 0.930033916 | - T2D risk | 5'UTR   |
| cg11989683 | PACS2    | chr14 | 0.930033916 | - T2D risk | TSS200  |
| cg01421943 | DKK2     | chr4  | 0.930095049 | + T2D risk | 3'UTR   |
| cg02577253 | GRK5     | chr10 | 0.930288095 | - T2D risk | Body    |
| cg01520325 | NF1      | chr17 | 0.930301026 | - T2D risk | Body    |
| cg22813699 | NCOA2    | chr8  | 0.930481429 | + T2D risk | 5'UTR   |
| cg23962841 | DIP2C    | chr10 | 0.93086011  | + T2D risk | Body    |
| cg09984349 | CUL1     | chr7  | 0.930997086 | + T2D risk | Body    |
| cg16326335 | DIP2C    | chr10 | 0.931059303 | - T2D risk | Body    |
| cg23952952 | CTR9     | chr11 | 0.931061092 | + T2D risk | TSS1500 |
| cg24473518 | FNIP2    | chr4  | 0.931146836 | - T2D risk | Body    |
| cg11479256 | CDH22    | chr20 | 0.931168719 | - T2D risk | Body    |
| cg03621156 | FBXO11   | chr2  | 0.931348225 | + T2D risk | TSS1500 |
| cg03621156 | FBXO11   | chr2  | 0.931348225 | + T2D risk | Body    |
| cg20421672 | ATP6V1H  | chr8  | 0.931402484 | + T2D risk | Body    |
| cg01320648 | KIAA1109 | chr4  | 0.931415911 | - T2D risk | TSS1500 |
| cg07958098 | CUX1     | chr7  | 0.931514621 | + T2D risk | Body    |
| cg10162572 | GALK2    | chr15 | 0.931526515 | + T2D risk | Body    |
| cg27093958 | PRKAG2   | chr7  | 0.931538754 | + T2D risk | Body    |
| cg19423907 | UBE2K    | chr4  | 0.931875375 | - T2D risk | 1stExon |
| cg19423907 | UBE2K    | chr4  | 0.931875375 | - T2D risk | 5'UTR   |
| cg00477776 | DIP2C    | chr10 | 0.93193357  | - T2D risk | Body    |
| cg10600828 | ZHX2     | chr8  | 0.932049062 | - T2D risk | 5'UTR   |
| cg09280022 | DIP2C    | chr10 | 0.932135526 | + T2D risk | Body    |
| cg12736613 | PRKAG2   | chr7  | 0.932262334 | - T2D risk | 5'UTR   |
| cg12736613 | PRKAG2   | chr7  | 0.932262334 | - T2D risk | Body    |
| cg10009287 | RCAN2    | chr6  | 0.932305045 | + T2D risk | Body    |
| cg21712036 | ATP2B1   | chr12 | 0.932508159 | + T2D risk | 1stExon |
| cg00522048 | GRK5     | chr10 | 0.932948022 | - T2D risk | Body    |
| cg24443925 | NCOR1    | chr17 | 0.932954621 | - T2D risk | 5'UTR   |
| cg24443925 | NCOR1    | chr17 | 0.932954621 | - T2D risk | 1stExon |
| cg11937346 | NDUFB3   | chr2  | 0.933030956 | + T2D risk | TSS200  |
| cg24465721 | PFKFB2   | chr1  | 0.933056315 | + T2D risk | 5'UTR   |
| cg04711042 | FLT1     | chr13 | 0.933090999 | - T2D risk | Body    |
| cg02167097 | KIAA0355 | chr19 | 0.933200698 | + T2D risk | Body    |
| cg15126544 | GAD1     | chr2  | 0.93342029  | - T2D risk | Body    |
| cg25353069 | APBA1    | chr9  | 0.933701593 | - T2D risk | 5'UTR   |
| cg07993642 | NCOA7    | chr6  | 0.933749821 | - T2D risk | TSS1500 |
| cg00954391 | DIP2C    | chr10 | 0.933791835 | + T2D risk | Body    |
| cg06633147 | PICALM   | chr11 | 0.933804844 | + T2D risk | TSS1500 |
| cg11028291 | PACS2    | chr14 | 0.933835525 | - T2D risk | Body    |
| cg18332471 | RSF1     | chr11 | 0.933896352 | - T2D risk | Body    |
| cg14141619 | ANK3     | chr10 | 0.933910565 | + T2D risk | Body    |
| cg15972984 | TSGA10   | chr2  | 0.933979813 | + T2D risk | 5'UTR   |
| cg22712920 | UXS1     | chr2  | 0.933983072 | + T2D risk | Body    |



|            |          |       |             |            |         |
|------------|----------|-------|-------------|------------|---------|
| cg19205482 | BCAT1    | chr12 | 0.934021742 | - T2D risk | Body    |
| cg09305491 | PRKCB    | chr16 | 0.934417968 | + T2D risk | Body    |
| cg06185440 | PHACTR1  | chr6  | 0.934446869 | - T2D risk | Body    |
| cg23053513 | DNAJC1   | chr10 | 0.934626312 | + T2D risk | TSS1500 |
| cg23374955 | PRKCE    | chr2  | 0.934641546 | + T2D risk | Body    |
| cg19571504 | CUX2     | chr12 | 0.934859952 | + T2D risk | Body    |
| cg12851031 | RAP2A    | chr13 | 0.934896995 | - T2D risk | 3'UTR   |
| cg12917258 | MMS19    | chr10 | 0.934948139 | + T2D risk | Body    |
| cg02712546 | WWP2     | chr16 | 0.93495228  | - T2D risk | Body    |
| cg05211561 | PPP1R12A | chr12 | 0.934963723 | + T2D risk | Body    |
| cg05211561 | PPP1R12A | chr12 | 0.934963723 | + T2D risk | ExonBnd |
| cg00957886 | PDE7A    | chr8  | 0.935063914 | - T2D risk | Body    |
| cg08833024 | PRKAG2   | chr7  | 0.935320589 | - T2D risk | Body    |
| cg19389056 | SLIT3    | chr5  | 0.935356033 | + T2D risk | Body    |
| cg03057023 | DIP2C    | chr10 | 0.935671958 | - T2D risk | Body    |
| cg14394677 | NUP98    | chr11 | 0.935705133 | + T2D risk | Body    |
| cg09556170 | ZHX2     | chr8  | 0.935898052 | + T2D risk | 5'UTR   |
| cg20605626 | SCGN     | chr6  | 0.935905575 | + T2D risk | Body    |
| cg01121978 | SLC29A4  | chr7  | 0.935969276 | - T2D risk | Body    |
| cg03940392 | ULK4     | chr3  | 0.9360037   | - T2D risk | Body    |
| cg03718514 | RBM4     | chr11 | 0.936259246 | + T2D risk | 3'UTR   |
| cg23589035 | ASH1L    | chr1  | 0.936323387 | - T2D risk | Body    |
| cg04115631 | KDM4B    | chr19 | 0.936374956 | + T2D risk | Body    |
| cg27524403 | SGSM2    | chr17 | 0.936391    | + T2D risk | Body    |
| cg04211238 | TENM2    | chr5  | 0.93640116  | - T2D risk | Body    |
| cg26474925 | ZHX2     | chr8  | 0.936575277 | - T2D risk | TSS1500 |
| cg05958740 | CPLX2    | chr5  | 0.936580131 | + T2D risk | 5'UTR   |
| cg13108341 | DNAH9    | chr17 | 0.936636919 | + T2D risk | Body    |
| cg09347495 | CLIC5    | chr6  | 0.93666644  | + T2D risk | TSS1500 |
| cg13107083 | PDE3A    | chr12 | 0.936822649 | - T2D risk | Body    |
| cg13461192 | RHOQ     | chr2  | 0.936918448 | - T2D risk | Body    |
| cg20411181 | PRKCE    | chr2  | 0.937159479 | + T2D risk | Body    |
| cg06727598 | TAB2     | chr6  | 0.937187135 | + T2D risk | 5'UTR   |
| cg06727598 | TAB2     | chr6  | 0.937187135 | + T2D risk | Body    |
| cg22729960 | PTPRU    | chr1  | 0.937188157 | - T2D risk | Body    |
| cg09597759 | CNTNAP2  | chr7  | 0.93719798  | - T2D risk | Body    |
| cg11572845 | SCAF8    | chr6  | 0.937312426 | + T2D risk | Body    |
| cg03464847 | DNAH9    | chr17 | 0.937425938 | + T2D risk | TSS200  |
| cg08941570 | CEP126   | chr11 | 0.937495217 | - T2D risk | ExonBnd |
| cg08941570 | CEP126   | chr11 | 0.937495217 | - T2D risk | Body    |
| cg02373104 | CNTNAP2  | chr7  | 0.937549326 | + T2D risk | Body    |
| cg26103788 | KIAA1217 | chr10 | 0.937671125 | - T2D risk | Body    |
| cg06196954 | CALD1    | chr7  | 0.937857324 | + T2D risk | 5'UTR   |
| cg06927625 | SRPK2    | chr7  | 0.938033711 | - T2D risk | Body    |
| cg06927625 | SRPK2    | chr7  | 0.938033711 | - T2D risk | 5'UTR   |
| cg06927625 | SRPK2    | chr7  | 0.938033711 | - T2D risk | TSS1500 |
| cg09862303 | SLIT3    | chr5  | 0.938075388 | + T2D risk | Body    |
| cg03498913 | GAD1     | chr2  | 0.938132698 | - T2D risk | 1stExon |
| cg03498913 | GAD1     | chr2  | 0.938132698 | - T2D risk | 5'UTR   |
| cg18009045 | GRK5     | chr10 | 0.938195501 | + T2D risk | Body    |
| cg25109009 | NQO1     | chr16 | 0.938253397 | + T2D risk | Body    |
| cg14365083 | DNAJC13  | chr3  | 0.938308628 | - T2D risk | Body    |
| cg14365083 | DNAJC13  | chr3  | 0.938308628 | - T2D risk | ExonBnd |
| cg14550506 | ROBO2    | chr3  | 0.93837802  | + T2D risk | 5'UTR   |
| cg14550506 | ROBO2    | chr3  | 0.93837802  | + T2D risk | Body    |
| cg06724394 | CHKA     | chr11 | 0.938684515 | + T2D risk | Body    |
| cg03495744 | SKAP1    | chr17 | 0.938774584 | - T2D risk | Body    |
| cg00356435 | CUL1     | chr7  | 0.938964918 | + T2D risk | TSS1500 |
| cg07260605 | ZRANB1   | chr10 | 0.939035432 | - T2D risk | TSS200  |
| cg11760356 | TSGA10   | chr2  | 0.939617628 | - T2D risk | 5'UTR   |
| cg05843010 | ENAH     | chr1  | 0.939674505 | - T2D risk | Body    |
| cg16525897 | ASXL2    | chr2  | 0.939687966 | + T2D risk | Body    |
| cg04490037 | DDC      | chr7  | 0.939886553 | - T2D risk | TSS1500 |
| cg03075561 | NDUFB3   | chr2  | 0.940034309 | + T2D risk | 5'UTR   |
| cg03075561 | NDUFB3   | chr2  | 0.940034309 | + T2D risk | 1stExon |
| cg25881459 | NF1      | chr17 | 0.94008114  | - T2D risk | Body    |
| cg11109510 | SSB      | chr2  | 0.940189372 | + T2D risk | TSS200  |
| cg03693714 | MGRN1    | chr16 | 0.940362149 | - T2D risk | Body    |
| cg20145176 | RSF1     | chr11 | 0.940377982 | - T2D risk | Body    |
| cg26932364 | DDC      | chr7  | 0.940403534 | - T2D risk | Body    |



|            |          |       |             |            |         |
|------------|----------|-------|-------------|------------|---------|
| cg05240442 | CUX1     | chr7  | 0.940448347 | + T2D risk | Body    |
| cg06251764 | KIAA1217 | chr10 | 0.940466159 | - T2D risk | TSS1500 |
| cg19682001 | RHBDD1   | chr2  | 0.94054074  | + T2D risk | 5'UTR   |
| cg22210294 | KCNJ12   | chr17 | 0.940670526 | + T2D risk | 5'UTR   |
| cg19716299 | TSC22D1  | chr13 | 0.940894449 | + T2D risk | Body    |
| cg14776616 | KIAA1217 | chr10 | 0.940914837 | - T2D risk | 5'UTR   |
| cg14776616 | KIAA1217 | chr10 | 0.940914837 | - T2D risk | Body    |
| cg13400720 | ATXN1    | chr6  | 0.941009792 | + T2D risk | 5'UTR   |
| cg16800724 | GLG1     | chr16 | 0.941038452 | - T2D risk | 3'UTR   |
| cg16800724 | GLG1     | chr16 | 0.941038452 | - T2D risk | Body    |
| cg06660278 | APC      | chr5  | 0.941060879 | - T2D risk | Body    |
| cg06660278 | APC      | chr5  | 0.941060879 | - T2D risk | 5'UTR   |
| cg05968596 | EFR3A    | chr8  | 0.94124572  | + T2D risk | Body    |
| cg25430350 | PRKCE    | chr2  | 0.941470019 | - T2D risk | Body    |
| cg03037416 | DNAJC1   | chr10 | 0.941514769 | + T2D risk | Body    |
| cg13263904 | TSGA10   | chr2  | 0.941583719 | + T2D risk | TSS1500 |
| cg13263904 | TSGA10   | chr2  | 0.941583719 | + T2D risk | 5'UTR   |
| cg16997488 | ITGA1    | chr5  | 0.941664619 | - T2D risk | TSS200  |
| cg27024992 | FBXO11   | chr2  | 0.941678781 | + T2D risk | 5'UTR   |
| cg18227352 | POC1B    | chr12 | 0.941728955 | - T2D risk | Body    |
| cg02841199 | LCA5     | chr6  | 0.94179076  | + T2D risk | TSS1500 |
| cg24990327 | CNTNAP2  | chr7  | 0.94185263  | + T2D risk | Body    |
| cg14263244 | PPP1R12A | chr12 | 0.941886315 | - T2D risk | TSS1500 |
| cg06856863 | GLG1     | chr16 | 0.941943272 | + T2D risk | Body    |
| cg02673938 | KDM4B    | chr19 | 0.942057148 | - T2D risk | 5'UTR   |
| cg18759429 | APC      | chr5  | 0.942095652 | - T2D risk | Body    |
| cg27485287 | RRAGB    | chrX  | 0.942487135 | + T2D risk | Body    |
| cg18812366 | PHACTR1  | chr6  | 0.942557851 | + T2D risk | Body    |
| cg02553170 | PRKACB   | chr1  | 0.942568066 | + T2D risk | Body    |
| cg07374698 | INPP4A   | chr2  | 0.942580958 | + T2D risk | Body    |
| cg03640051 | ATP8A1   | chr4  | 0.942581251 | - T2D risk | Body    |
| cg22070062 | ANK3     | chr10 | 0.9427721   | - T2D risk | TSS1500 |
| cg22070062 | ANK3     | chr10 | 0.9427721   | - T2D risk | Body    |
| cg15853478 | AMD1     | chr6  | 0.942818662 | + T2D risk | TSS1500 |
| cg04240200 | ATRNL    | chr20 | 0.942890055 | - T2D risk | TSS1500 |
| cg22831256 | DIP2C    | chr10 | 0.942925893 | + T2D risk | Body    |
| cg17398595 | SH3GL2   | chr9  | 0.942998475 | - T2D risk | TSS1500 |
| cg02477365 | ROBO2    | chr3  | 0.943087715 | + T2D risk | Body    |
| cg02358647 | SCGN     | chr6  | 0.943186685 | - T2D risk | Body    |
| cg05848345 | ARHGAP32 | chr11 | 0.943213898 | - T2D risk | Body    |
| cg11043888 | ZRANB1   | chr10 | 0.94358023  | - T2D risk | Body    |
| cg25638443 | ST8SIA1  | chr12 | 0.943624125 | - T2D risk | Body    |
| cg00294550 | ANK3     | chr10 | 0.943643159 | + T2D risk | Body    |
| cg23849410 | UNC80    | chr2  | 0.943649364 | + T2D risk | Body    |
| cg24627299 | MET      | chr7  | 0.9436663   | + T2D risk | TSS1500 |
| cg01377061 | KCNJ12   | chr17 | 0.943682093 | + T2D risk | 5'UTR   |
| cg26604214 | RAP1GAP2 | chr17 | 0.943700351 | - T2D risk | Body    |
| cg09808176 | NPAT     | chr11 | 0.943767282 | - T2D risk | Body    |
| cg00501467 | PHACTR1  | chr6  | 0.943785777 | + T2D risk | Body    |
| cg05358946 | INPP4A   | chr2  | 0.94381202  | - T2D risk | 5'UTR   |
| cg20089535 | KCNIP3   | chr2  | 0.943893556 | - T2D risk | Body    |
| cg01438658 | NCOA7    | chr6  | 0.943903167 | - T2D risk | 5'UTR   |
| cg23352695 | NF1      | chr17 | 0.943944842 | + T2D risk | Body    |
| cg23092782 | ITGA1    | chr5  | 0.943988761 | + T2D risk | Body    |
| cg03436967 | CNTNAP2  | chr7  | 0.944088731 | + T2D risk | Body    |
| cg03763240 | ACTN4    | chr19 | 0.944141632 | - T2D risk | Body    |
| cg11874016 | RAP2A    | chr13 | 0.944242029 | + T2D risk | Body    |
| cg17243816 | NPAT     | chr11 | 0.944326939 | + T2D risk | Body    |
| cg05463900 | PACS1    | chr11 | 0.944351719 | + T2D risk | Body    |
| cg00661512 | ATP8A1   | chr4  | 0.944388345 | - T2D risk | Body    |
| cg10996349 | CPLX2    | chr5  | 0.944405674 | + T2D risk | 5'UTR   |
| cg00453583 | GPC4     | chrX  | 0.944450883 | - T2D risk | Body    |
| cg15700587 | CNTNAP2  | chr7  | 0.944564257 | - T2D risk | Body    |
| cg07923717 | MMS19    | chr10 | 0.944687547 | + T2D risk | TSS1500 |
| cg12903174 | RGS7     | chr1  | 0.944810215 | - T2D risk | Body    |
| cg13168437 | EVI5     | chr1  | 0.944879808 | + T2D risk | Body    |
| cg16282982 | YWHAQ    | chr2  | 0.944969122 | - T2D risk | 5'UTR   |
| cg21272913 | KIAA1217 | chr10 | 0.945004662 | - T2D risk | 1stExon |
| cg21272913 | KIAA1217 | chr10 | 0.945004662 | - T2D risk | 5'UTR   |
| cg24025567 | CUX1     | chr7  | 0.945075876 | + T2D risk | Body    |



|            |          |       |             |            |         |
|------------|----------|-------|-------------|------------|---------|
| cg02316239 | ANKHD1   | chr5  | 0.945102585 | + T2D risk | Body    |
| cg06058319 | PPFIBP1  | chr12 | 0.945105319 | - T2D risk | 5'UTR   |
| cg06058319 | PPFIBP1  | chr12 | 0.945105319 | - T2D risk | 1stExon |
| cg04524109 | TPCN1    | chr12 | 0.945119284 | - T2D risk | Body    |
| cg15205568 | NOTCH3   | chr19 | 0.945197478 | - T2D risk | Body    |
| cg19889583 | TBC1D5   | chr3  | 0.945212113 | - T2D risk | Body    |
| cg01087456 | ARIH1    | chr15 | 0.945213893 | + T2D risk | Body    |
| cg17669573 | WWP2     | chr16 | 0.945232416 | + T2D risk | Body    |
| cg03240609 | UXS1     | chr2  | 0.945273952 | - T2D risk | 5'UTR   |
| cg03240609 | UXS1     | chr2  | 0.945273952 | - T2D risk | Body    |
| cg16377888 | RAP1GAP2 | chr17 | 0.945277753 | + T2D risk | TSS1500 |
| cg15096147 | FLT1     | chr13 | 0.945458022 | - T2D risk | Body    |
| cg23741982 | MDM1     | chr12 | 0.945613964 | - T2D risk | TSS200  |
| cg25945562 | ZHX2     | chr8  | 0.945918275 | - T2D risk | 5'UTR   |
| cg07644482 | HMBOX1   | chr8  | 0.945943761 | + T2D risk | Body    |
| cg06376186 | CNTNAP2  | chr7  | 0.9459449   | + T2D risk | Body    |
| cg19624299 | ERC2     | chr3  | 0.945946407 | + T2D risk | 3'UTR   |
| cg06927522 | CNTNAP2  | chr7  | 0.946023665 | - T2D risk | Body    |
| cg21322235 | RET      | chr10 | 0.946179116 | - T2D risk | Body    |
| cg07083884 | POLA1    | chrX  | 0.946267115 | - T2D risk | Body    |
| cg02348597 | ARHGAP32 | chr11 | 0.94640022  | - T2D risk | TSS200  |
| cg02348597 | ARHGAP32 | chr11 | 0.94640022  | - T2D risk | Body    |
| cg14034092 | CHFR     | chr12 | 0.946468373 | + T2D risk | Body    |
| cg11839258 | PKD1     | chr2  | 0.94646911  | + T2D risk | Body    |
| cg24456033 | ARL15    | chr5  | 0.946488091 | - T2D risk | Body    |
| cg01883578 | TOX3     | chr16 | 0.946536471 | + T2D risk | 5'UTR   |
| cg01883578 | TOX3     | chr16 | 0.946536471 | + T2D risk | Body    |
| cg06382294 | MAST1    | chr19 | 0.946559334 | + T2D risk | Body    |
| cg06156195 | DIP2C    | chr10 | 0.946563606 | + T2D risk | Body    |
| cg25091365 | WWP2     | chr16 | 0.946573368 | - T2D risk | 5'UTR   |
| cg06438559 | SPOCK1   | chr5  | 0.946722005 | + T2D risk | Body    |
| cg06298680 | GRK5     | chr10 | 0.946744366 | - T2D risk | Body    |
| cg04434701 | CLEC16A  | chr16 | 0.946791769 | + T2D risk | Body    |
| cg26421633 | ENAH     | chr1  | 0.94682847  | + T2D risk | Body    |
| cg06841713 | DIP2C    | chr10 | 0.946835579 | + T2D risk | Body    |
| cg12893431 | CLOCK    | chr4  | 0.946947137 | - T2D risk | Body    |
| cg26187219 | ITGA1    | chr5  | 0.947136983 | + T2D risk | Body    |
| cg26555733 | PRKCB    | chr16 | 0.947142458 | + T2D risk | TSS1500 |
| cg21353232 | SEZ6L    | chr22 | 0.947231224 | + T2D risk | TSS1500 |
| cg27185131 | TANC2    | chr17 | 0.947233113 | - T2D risk | Body    |
| cg18006794 | AGPAT3   | chr21 | 0.947266613 | - T2D risk | 5'UTR   |
| cg12170804 | CUX1     | chr7  | 0.947307165 | - T2D risk | Body    |
| cg27054166 | HMBOX1   | chr8  | 0.94734775  | + T2D risk | Body    |
| cg17121400 | ATP8A2   | chr13 | 0.947394375 | - T2D risk | Body    |
| cg00995797 | ACSS2    | chr20 | 0.947556198 | - T2D risk | TSS1500 |
| cg00995797 | ACSS2    | chr20 | 0.947556198 | - T2D risk | 5'UTR   |
| cg19032567 | PACS1    | chr11 | 0.947566561 | - T2D risk | Body    |
| cg24462468 | SKAP1    | chr17 | 0.947659973 | - T2D risk | Body    |
| cg19942138 | ANK2     | chr4  | 0.947680526 | - T2D risk | Body    |
| cg26844733 | TMEM219  | chr16 | 0.947786426 | - T2D risk | 5'UTR   |
| cg25961246 | ATRNL1   | chr10 | 0.947858541 | - T2D risk | Body    |
| cg06323332 | MGRN1    | chr16 | 0.947911406 | - T2D risk | Body    |
| cg02737746 | SH3GL2   | chr9  | 0.947943673 | - T2D risk | TSS1500 |
| cg14008500 | ANK2     | chr4  | 0.948031895 | - T2D risk | 1stExon |
| cg14008500 | ANK2     | chr4  | 0.948031895 | - T2D risk | 5'UTR   |
| cg15619703 | PRKCB    | chr16 | 0.948103076 | + T2D risk | Body    |
| cg10024508 | CHID1    | chr11 | 0.948126414 | - T2D risk | Body    |
| cg23480855 | CUX1     | chr7  | 0.948185381 | + T2D risk | Body    |
| cg07538364 | SLC7A2   | chr8  | 0.948346215 | + T2D risk | Body    |
| cg07066326 | CHID1    | chr11 | 0.948529801 | - T2D risk | 5'UTR   |
| cg01812826 | ZHX2     | chr8  | 0.94861144  | + T2D risk | TSS200  |
| cg09128430 | AGPAT3   | chr21 | 0.948814979 | + T2D risk | 5'UTR   |
| cg03361665 | WIZ      | chr19 | 0.948876421 | + T2D risk | 5'UTR   |
| cg03361665 | WIZ      | chr19 | 0.948876421 | + T2D risk | 1stExon |
| cg27020749 | HMBOX1   | chr8  | 0.948881744 | + T2D risk | 5'UTR   |
| cg01667702 | CNTROB   | chr17 | 0.948940197 | + T2D risk | 1stExon |
| cg10761987 | ANK3     | chr10 | 0.948969833 | + T2D risk | Body    |
| cg02196730 | MTHFS    | chr15 | 0.949018455 | + T2D risk | Body    |
| cg08258245 | DYNC1I2  | chr2  | 0.94914699  | - T2D risk | Body    |
| cg13424422 | COL4A1   | chr13 | 0.949184666 | + T2D risk | Body    |



|               |           |       |             |            |         |
|---------------|-----------|-------|-------------|------------|---------|
| cg03178972    | POLA1     | chrX  | 0.949307105 | - T2D risk | Body    |
| cg09430206    | NQO1      | chr16 | 0.949308574 | + T2D risk | 5'UTR   |
| cg09430206    | NQO1      | chr16 | 0.949308574 | + T2D risk | 1stExon |
| cg03211481    | DNAJC1    | chr10 | 0.949455857 | + T2D risk | Body    |
| cg10291857    | SNX4      | chr3  | 0.9495811   | - T2D risk | Body    |
| cg06629748    | ANK2      | chr4  | 0.949695849 | - T2D risk | Body    |
| cg25530795    | SRPK2     | chr7  | 0.949835493 | + T2D risk | Body    |
| cg25530795    | SRPK2     | chr7  | 0.949835493 | + T2D risk | 5'UTR   |
| cg25530795    | SRPK2     | chr7  | 0.949835493 | + T2D risk | TSS1500 |
| ch.12.561130F | BCAT1     | chr12 | 0.949848352 | - T2D risk | Body    |
| cg25434272    | ATRNL1    | chr10 | 0.949875085 | + T2D risk | Body    |
| cg15713739    | RNF157    | chr17 | 0.950085697 | - T2D risk | Body    |
| cg24197567    | MET       | chr7  | 0.950157424 | - T2D risk | Body    |
| cg16913600    | SSBP2     | chr5  | 0.950269497 | - T2D risk | Body    |
| cg08598988    | ADCY5     | chr3  | 0.950388299 | - T2D risk | 1stExon |
| cg27396978    | PRKCB     | chr16 | 0.950426753 | + T2D risk | Body    |
| cg18732042    | ANK3      | chr10 | 0.950578552 | + T2D risk | Body    |
| cg19563049    | ATXN1     | chr6  | 0.950585656 | + T2D risk | 5'UTR   |
| cg21347224    | PPFIBP1   | chr12 | 0.950613738 | + T2D risk | 5'UTR   |
| cg22233595    | COL4A1    | chr13 | 0.950620867 | - T2D risk | Body    |
| cg26766678    | NGLY1     | chr3  | 0.950629759 | + T2D risk | Body    |
| cg26766678    | NGLY1     | chr3  | 0.950629759 | + T2D risk | TSS200  |
| cg02820104    | ZHX2      | chr8  | 0.950653461 | - T2D risk | 5'UTR   |
| cg10103520    | PRKD1     | chr14 | 0.950729984 | - T2D risk | Body    |
| cg04500377    | DDHD2     | chr8  | 0.950733025 | + T2D risk | 5'UTR   |
| cg19930065    | IFT74     | chr9  | 0.950734775 | - T2D risk | Body    |
| cg26813796    | ENAH      | chr1  | 0.950771162 | - T2D risk | Body    |
| cg05827943    | HNRNPA2B1 | chr7  | 0.950775273 | + T2D risk | TSS1500 |
| cg02349914    | SGSM2     | chr17 | 0.950777429 | + T2D risk | Body    |
| cg22926560    | PFKFB2    | chr1  | 0.950798124 | - T2D risk | 5'UTR   |
| cg18976571    | SRPK2     | chr7  | 0.950814452 | + T2D risk | Body    |
| cg08849661    | GRK5      | chr10 | 0.950857126 | - T2D risk | Body    |
| cg22997601    | KDM4B     | chr19 | 0.950935057 | - T2D risk | Body    |
| cg11180624    | DYNC111   | chr7  | 0.950946932 | + T2D risk | Body    |
| cg22268025    | STX6      | chr1  | 0.951037937 | + T2D risk | TSS1500 |
| cg16998122    | ASH1L     | chr1  | 0.951101115 | - T2D risk | Body    |
| cg04478673    | WDR48     | chr3  | 0.951119029 | + T2D risk | ExonBnd |
| cg04478673    | WDR48     | chr3  | 0.951119029 | + T2D risk | Body    |
| cg02700106    | DIP2C     | chr10 | 0.951133286 | + T2D risk | Body    |
| cg07062938    | RHBDD1    | chr2  | 0.95127126  | - T2D risk | Body    |
| cg11073447    | CUX2      | chr12 | 0.951325263 | + T2D risk | Body    |
| cg13068174    | ERC2      | chr3  | 0.95134649  | - T2D risk | 3'UTR   |
| cg00460944    | CHFR      | chr12 | 0.95158899  | - T2D risk | Body    |
| cg20115827    | PCYT1A    | chr3  | 0.951630849 | + T2D risk | 5'UTR   |
| cg00902463    | RAP1GAP2  | chr17 | 0.951644636 | - T2D risk | 3'UTR   |
| cg04260737    | RTN4      | chr2  | 0.95167384  | - T2D risk | TSS1500 |
| cg04260737    | RTN4      | chr2  | 0.95167384  | - T2D risk | Body    |
| cg04430599    | RPGR      | chrX  | 0.951772521 | - T2D risk | Body    |
| cg21538684    | PHACTR1   | chr6  | 0.951825837 | + T2D risk | Body    |
| cg02058469    | TBC1D5    | chr3  | 0.95187638  | + T2D risk | Body    |
| cg18694685    | DYNC111   | chr7  | 0.951967282 | + T2D risk | Body    |
| cg18694685    | DYNC111   | chr7  | 0.951967282 | + T2D risk | ExonBnd |
| cg23692214    | ZRANB1    | chr10 | 0.951982158 | + T2D risk | 1stExon |
| cg10409832    | TMEM131   | chr2  | 0.952072442 | - T2D risk | ExonBnd |
| cg10409832    | TMEM131   | chr2  | 0.952072442 | - T2D risk | Body    |
| cg21499137    | TOP2A     | chr17 | 0.95213199  | - T2D risk | TSS200  |
| cg00039463    | CREBBP    | chr16 | 0.952159577 | + T2D risk | TSS1500 |
| cg08567670    | TPCN1     | chr12 | 0.952601172 | - T2D risk | Body    |
| cg08567670    | TPCN1     | chr12 | 0.952601172 | - T2D risk | TSS1500 |
| cg11989968    | PDK1      | chr2  | 0.952817546 | - T2D risk | Body    |
| cg23338380    | CUX1      | chr7  | 0.95284923  | + T2D risk | Body    |
| cg22999327    | PDE3A     | chr12 | 0.952975459 | - T2D risk | Body    |
| cg18307442    | PDE7A     | chr8  | 0.95298965  | - T2D risk | TSS1500 |
| cg18307442    | PDE7A     | chr8  | 0.95298965  | - T2D risk | Body    |
| cg23861617    | TMEM150C  | chr4  | 0.953003574 | + T2D risk | Body    |
| cg07694386    | TMEM219   | chr16 | 0.95301725  | - T2D risk | TSS1500 |
| cg27584713    | PHACTR1   | chr6  | 0.953167438 | + T2D risk | TSS1500 |
| cg20716668    | GRK5      | chr10 | 0.953189072 | + T2D risk | Body    |
| cg10872057    | DIP2C     | chr10 | 0.953328633 | - T2D risk | Body    |
| cg01142219    | KIAA0232  | chr4  | 0.953379159 | + T2D risk | TSS1500 |



|            |          |       |             |            |         |
|------------|----------|-------|-------------|------------|---------|
| cg16362603 | SEMA3G   | chr3  | 0.953469208 | - T2D risk | 1stExon |
| cg17910586 | SEMA3G   | chr3  | 0.953557555 | + T2D risk | TSS200  |
| cg08951513 | APC      | chr5  | 0.953744497 | - T2D risk | Body    |
| cg12726835 | NCOA2    | chr8  | 0.953757122 | + T2D risk | 5'UTR   |
| cg22938535 | FNIP2    | chr4  | 0.953775972 | - T2D risk | Body    |
| cg20433382 | RNF217   | chr6  | 0.953828732 | - T2D risk | Body    |
| cg25078427 | AGPAT3   | chr21 | 0.954021363 | + T2D risk | 5'UTR   |
| cg25078427 | AGPAT3   | chr21 | 0.954021363 | + T2D risk | TSS1500 |
| cg03726739 | SLIT3    | chr5  | 0.954040943 | - T2D risk | Body    |
| cg23371106 | CNTNAP2  | chr7  | 0.95410458  | + T2D risk | Body    |
| cg14680686 | CRYL1    | chr13 | 0.954202985 | + T2D risk | Body    |
| cg08237117 | CHFR     | chr12 | 0.954327957 | + T2D risk | Body    |
| cg25661142 | WIZ      | chr19 | 0.95457383  | - T2D risk | Body    |
| cg07962641 | HMBX1    | chr8  | 0.954610892 | - T2D risk | 5'UTR   |
| cg21235025 | DACH1    | chr13 | 0.954775097 | - T2D risk | Body    |
| cg25889115 | SVIP     | chr11 | 0.954836043 | + T2D risk | Body    |
| cg11532302 | PLAGL1   | chr6  | 0.955155847 | - T2D risk | TSS1500 |
| cg11532302 | PLAGL1   | chr6  | 0.955155847 | - T2D risk | 5'UTR   |
| cg06642945 | PACRG    | chr6  | 0.955398343 | - T2D risk | Body    |
| cg15878435 | PLEKHG3  | chr14 | 0.955537432 | + T2D risk | 1stExon |
| cg15878435 | PLEKHG3  | chr14 | 0.955537432 | + T2D risk | 5'UTR   |
| cg03353442 | DENND4C  | chr9  | 0.955763646 | + T2D risk | Body    |
| cg03353442 | DENND4C  | chr9  | 0.955763646 | + T2D risk | 5'UTR   |
| cg20771168 | SRPK2    | chr7  | 0.955773961 | - T2D risk | Body    |
| cg23962495 | PRKCB    | chr16 | 0.955804292 | + T2D risk | Body    |
| cg21417381 | TTC28    | chr22 | 0.955902866 | + T2D risk | Body    |
| cg08218437 | PHACTR1  | chr6  | 0.955906721 | - T2D risk | Body    |
| cg24534006 | PRKCB    | chr16 | 0.955908968 | + T2D risk | Body    |
| cg12442677 | TMEM219  | chr16 | 0.955949198 | + T2D risk | Body    |
| cg09307569 | CLEC16A  | chr16 | 0.956213368 | - T2D risk | Body    |
| cg09589374 | ATP8A2   | chr13 | 0.95637362  | + T2D risk | Body    |
| cg12102607 | GNA12    | chr7  | 0.956395554 | - T2D risk | Body    |
| cg12102607 | GNA12    | chr7  | 0.956395554 | - T2D risk | TSS200  |
| cg00370926 | CNTROB   | chr17 | 0.956431304 | - T2D risk | 1stExon |
| cg00370926 | CNTROB   | chr17 | 0.956431304 | - T2D risk | 5'UTR   |
| cg12097239 | ARL8B    | chr3  | 0.956441664 | - T2D risk | TSS200  |
| cg19277350 | ATXN1    | chr6  | 0.956489651 | + T2D risk | 5'UTR   |
| cg24872971 | NCOA2    | chr8  | 0.956554638 | + T2D risk | Body    |
| cg18453621 | LMX1B    | chr9  | 0.956655071 | - T2D risk | Body    |
| cg01342042 | DIP2C    | chr10 | 0.956663454 | - T2D risk | Body    |
| cg18753516 | TBC1D5   | chr3  | 0.95679268  | + T2D risk | 5'UTR   |
| cg18753516 | TBC1D5   | chr3  | 0.95679268  | + T2D risk | TSS1500 |
| cg01108370 | PRKAG2   | chr7  | 0.956850759 | - T2D risk | TSS1500 |
| cg01108370 | PRKAG2   | chr7  | 0.956850759 | - T2D risk | Body    |
| cg05726785 | FLT1     | chr13 | 0.956976573 | - T2D risk | Body    |
| cg21776797 | GLA      | chrX  | 0.957024564 | + T2D risk | 1stExon |
| cg08563062 | CALD1    | chr7  | 0.957047764 | - T2D risk | Body    |
| cg22544889 | ATP4A    | chr19 | 0.957147431 | + T2D risk | Body    |
| cg16072969 | DDHD2    | chr8  | 0.957264665 | - T2D risk | TSS1500 |
| cg09590216 | POC1B    | chr12 | 0.957418298 | - T2D risk | Body    |
| cg06741536 | RAP1B    | chr12 | 0.957719683 | + T2D risk | 5'UTR   |
| cg02704716 | ATP6V1H  | chr8  | 0.957732078 | - T2D risk | Body    |
| cg01926029 | EFR3A    | chr8  | 0.957914196 | - T2D risk | Body    |
| cg06152112 | TPCN1    | chr12 | 0.958116614 | + T2D risk | 5'UTR   |
| cg06152112 | TPCN1    | chr12 | 0.958116614 | + T2D risk | Body    |
| cg10764357 | BCAT1    | chr12 | 0.958169275 | - T2D risk | 5'UTR   |
| cg10764357 | BCAT1    | chr12 | 0.958169275 | - T2D risk | 1stExon |
| cg23701784 | RHBDD1   | chr2  | 0.958188078 | - T2D risk | Body    |
| cg21944372 | CLIC5    | chr6  | 0.958469012 | - T2D risk | TSS1500 |
| cg21944372 | CLIC5    | chr6  | 0.958469012 | - T2D risk | Body    |
| cg02995664 | TMEM131  | chr2  | 0.958579851 | + T2D risk | TSS1500 |
| cg05999828 | ULK4     | chr3  | 0.95861359  | + T2D risk | Body    |
| cg25456317 | KIAA1109 | chr4  | 0.958699134 | + T2D risk | Body    |
| cg21940038 | RAP1GAP2 | chr17 | 0.958859429 | - T2D risk | Body    |
| cg19000612 | ATP8A2   | chr13 | 0.958943226 | - T2D risk | Body    |
| cg19749532 | AGPAT3   | chr21 | 0.959001118 | + T2D risk | 5'UTR   |
| cg06952719 | CHKA     | chr11 | 0.959057132 | - T2D risk | TSS1500 |
| cg07485155 | TSHZ1    | chr18 | 0.959095083 | + T2D risk | TSS1500 |
| cg18066197 | CHFR     | chr12 | 0.959206279 | - T2D risk | 3'UTR   |
| cg01313234 | IMPA1    | chr8  | 0.959206586 | + T2D risk | Body    |



|            |         |       |             |            |         |
|------------|---------|-------|-------------|------------|---------|
| cg01313234 | IMPA1   | chr8  | 0.959206586 | + T2D risk | 5'UTR   |
| cg23862140 | PHACTR1 | chr6  | 0.959214314 | - T2D risk | Body    |
| cg22480742 | CALD1   | chr7  | 0.959267789 | + T2D risk | 1stExon |
| cg22480742 | CALD1   | chr7  | 0.959267789 | + T2D risk | Body    |
| cg02626417 | APC     | chr5  | 0.959418731 | - T2D risk | Body    |
| cg02626417 | APC     | chr5  | 0.959418731 | - T2D risk | 5'UTR   |
| cg07349962 | ANK3    | chr10 | 0.959450477 | - T2D risk | Body    |
| cg12401953 | SPOCK1  | chr5  | 0.959588494 | + T2D risk | Body    |
| cg24105728 | PHACTR1 | chr6  | 0.959659607 | + T2D risk | Body    |
| cg22408308 | DYNC1I2 | chr2  | 0.959760968 | - T2D risk | 5'UTR   |
| cg22408308 | DYNC1I2 | chr2  | 0.959760968 | - T2D risk | 1stExon |
| cg14640066 | RTN4    | chr2  | 0.959834188 | - T2D risk | Body    |
| cg14640066 | RTN4    | chr2  | 0.959834188 | - T2D risk | 1stExon |
| cg14640066 | RTN4    | chr2  | 0.959834188 | - T2D risk | 5'UTR   |
| cg08395925 | DLL4    | chr15 | 0.959873437 | + T2D risk | Body    |
| cg19712746 | KDR     | chr4  | 0.959985527 | + T2D risk | TSS1500 |
| cg17895149 | PLAGL1  | chr6  | 0.960167714 | - T2D risk | TSS1500 |
| cg17895149 | PLAGL1  | chr6  | 0.960167714 | - T2D risk | 5'UTR   |
| cg01097031 | PACS2   | chr14 | 0.960199641 | - T2D risk | TSS200  |
| cg24154257 | PRKAG2  | chr7  | 0.960234748 | - T2D risk | 5'UTR   |
| cg24154257 | PRKAG2  | chr7  | 0.960234748 | - T2D risk | Body    |
| cg19034820 | TTC28   | chr22 | 0.960245504 | - T2D risk | Body    |
| cg11298636 | SH3GL2  | chr9  | 0.960482861 | + T2D risk | Body    |
| cg08208595 | PACS2   | chr14 | 0.96056505  | + T2D risk | Body    |
| cg14881910 | PDLIM5  | chr4  | 0.960587893 | - T2D risk | 5'UTR   |
| cg14881910 | PDLIM5  | chr4  | 0.960587893 | - T2D risk | Body    |
| cg21455901 | CRYL1   | chr13 | 0.960712386 | + T2D risk | Body    |
| cg05427387 | DNAH9   | chr17 | 0.960726903 | - T2D risk | ExonBnd |
| cg05427387 | DNAH9   | chr17 | 0.960726903 | - T2D risk | Body    |
| cg26685404 | PRKCB   | chr16 | 0.960866748 | - T2D risk | Body    |
| cg03557391 | PDE5A   | chr4  | 0.960893646 | - T2D risk | Body    |
| cg03557391 | PDE5A   | chr4  | 0.960893646 | - T2D risk | 1stExon |
| cg03557391 | PDE5A   | chr4  | 0.960893646 | - T2D risk | 5'UTR   |
| cg12893271 | FLT1    | chr13 | 0.961055075 | - T2D risk | Body    |
| cg04333213 | KCNIP3  | chr2  | 0.961225565 | + T2D risk | TSS200  |
| cg04333213 | KCNIP3  | chr2  | 0.961225565 | + T2D risk | Body    |
| cg13714895 | IMPA1   | chr8  | 0.961237983 | + T2D risk | TSS1500 |
| cg00879444 | PRMT3   | chr11 | 0.961250875 | + T2D risk | Body    |
| cg03477477 | GRK5    | chr10 | 0.961292777 | - T2D risk | Body    |
| cg23922265 | CHID1   | chr11 | 0.961501422 | + T2D risk | 1stExon |
| cg23922265 | CHID1   | chr11 | 0.961501422 | + T2D risk | 5'UTR   |
| cg07883154 | PRKCB   | chr16 | 0.96175044  | - T2D risk | Body    |
| cg13634994 | LMX1B   | chr9  | 0.96175911  | - T2D risk | Body    |
| cg01409261 | ERC2    | chr3  | 0.961785502 | + T2D risk | 5'UTR   |
| cg14393732 | ANK3    | chr10 | 0.961893068 | - T2D risk | Body    |
| cg02286917 | PLAGL1  | chr6  | 0.961910784 | - T2D risk | 5'UTR   |
| cg17870211 | TTC28   | chr22 | 0.961979261 | + T2D risk | Body    |
| cg26616564 | DNAJC1  | chr10 | 0.962150845 | + T2D risk | Body    |
| cg17519949 | NOTCH3  | chr19 | 0.962200937 | - T2D risk | Body    |
| cg12581327 | NOL4    | chr18 | 0.96221916  | + T2D risk | Body    |
| cg04725743 | INPP4A  | chr2  | 0.962353125 | - T2D risk | 5'UTR   |
| cg16232206 | ST8SIA1 | chr12 | 0.962482528 | + T2D risk | 5'UTR   |
| cg16232206 | ST8SIA1 | chr12 | 0.962482528 | + T2D risk | Body    |
| cg23543612 | SEZ6L   | chr22 | 0.96251687  | + T2D risk | Body    |
| cg03647563 | PHACTR1 | chr6  | 0.962636575 | - T2D risk | Body    |
| cg17362398 | RPGR    | chrX  | 0.962795234 | - T2D risk | Body    |
| cg20355860 | ANK3    | chr10 | 0.96312847  | - T2D risk | 1stExon |
| cg20355860 | ANK3    | chr10 | 0.96312847  | - T2D risk | 5'UTR   |
| cg20355860 | ANK3    | chr10 | 0.96312847  | - T2D risk | Body    |
| cg17459743 | RSF1    | chr11 | 0.963193482 | + T2D risk | Body    |
| cg15358639 | ANK3    | chr10 | 0.963318814 | - T2D risk | Body    |
| cg10080685 | UBE2K   | chr4  | 0.963376646 | + T2D risk | Body    |
| cg18960983 | ACTN4   | chr19 | 0.963459047 | + T2D risk | Body    |
| cg22601350 | ARL15   | chr5  | 0.963495234 | + T2D risk | Body    |
| cg05719831 | CLEC16A | chr16 | 0.963547762 | - T2D risk | Body    |
| cg16859943 | PLEKHG3 | chr14 | 0.963555892 | + T2D risk | 5'UTR   |
| cg21170836 | PACS2   | chr14 | 0.963588033 | + T2D risk | Body    |
| cg04868325 | SLC30A8 | chr8  | 0.963615427 | + T2D risk | 5'UTR   |
| cg04868325 | SLC30A8 | chr8  | 0.963615427 | + T2D risk | TSS1500 |
| cg02554975 | IFT74   | chr9  | 0.963623688 | + T2D risk | 5'UTR   |



|            |          |       |             |            |         |
|------------|----------|-------|-------------|------------|---------|
| cg02554975 | IFT74    | chr9  | 0.963623688 | + T2D risk | TSS1500 |
| cg05615763 | FNIP2    | chr4  | 0.963699225 | + T2D risk | TSS1500 |
| cg19769379 | RHBDD1   | chr2  | 0.963751523 | + T2D risk | Body    |
| cg21414363 | KIAA1109 | chr4  | 0.963818418 | - T2D risk | Body    |
| cg21066622 | PLEKHG3  | chr14 | 0.963841666 | - T2D risk | Body    |
| cg19973668 | TENM2    | chr5  | 0.963900926 | + T2D risk | Body    |
| cg13994842 | PRKAG2   | chr7  | 0.964193809 | - T2D risk | TSS200  |
| cg13994842 | PRKAG2   | chr7  | 0.964193809 | - T2D risk | Body    |
| cg18325667 | AGPAT3   | chr21 | 0.964247218 | + T2D risk | 5'UTR   |
| cg05338165 | SNX4     | chr3  | 0.964303962 | + T2D risk | Body    |
| cg14801778 | PRMT3    | chr11 | 0.964356207 | - T2D risk | Body    |
| cg00536869 | CLEC16A  | chr16 | 0.964519242 | + T2D risk | Body    |
| cg17693115 | TPCN1    | chr12 | 0.964547918 | + T2D risk | Body    |
| cg19616687 | TENM2    | chr5  | 0.964548363 | - T2D risk | Body    |
| cg23321228 | MET      | chr7  | 0.964615082 | + T2D risk | Body    |
| cg00643051 | ARL15    | chr5  | 0.964647685 | - T2D risk | Body    |
| cg25618597 | CHFR     | chr12 | 0.964928321 | + T2D risk | Body    |
| cg12808151 | SSB      | chr2  | 0.964967712 | + T2D risk | Body    |
| cg05165050 | TANC2    | chr17 | 0.965014659 | - T2D risk | Body    |
| cg13648087 | NCOA7    | chr6  | 0.965069415 | - T2D risk | 5'UTR   |
| cg03140190 | CREBBP   | chr16 | 0.965321154 | + T2D risk | Body    |
| cg13878010 | ADCY5    | chr3  | 0.965554188 | - T2D risk | 1stExon |
| cg01898254 | SSBP2    | chr5  | 0.965579025 | - T2D risk | TSS1500 |
| cg23192604 | ARID2    | chr12 | 0.965764583 | - T2D risk | Body    |
| cg26040816 | JPH2     | chr20 | 0.965839995 | - T2D risk | 1stExon |
| cg26040816 | JPH2     | chr20 | 0.965839995 | - T2D risk | 5'UTR   |
| cg09400051 | PACS2    | chr14 | 0.965916975 | - T2D risk | 5'UTR   |
| cg22568523 | NOTCH3   | chr19 | 0.966046159 | - T2D risk | Body    |
| cg27474053 | GPC4     | chrX  | 0.966302947 | - T2D risk | Body    |
| cg17017994 | TTC28    | chr22 | 0.966425749 | + T2D risk | Body    |
| cg27089978 | WWP2     | chr16 | 0.96646905  | + T2D risk | 5'UTR   |
| cg19064506 | ASH1L    | chr1  | 0.966537483 | - T2D risk | Body    |
| cg16758764 | ATP6V1A  | chr3  | 0.96656015  | - T2D risk | 3'UTR   |
| cg14489299 | ANKHD1   | chr5  | 0.966598386 | - T2D risk | Body    |
| cg10797944 | RGS7     | chr1  | 0.966665492 | - T2D risk | Body    |
| cg06320111 | PDE7A    | chr8  | 0.966732623 | - T2D risk | Body    |
| cg01964683 | NUF2     | chr1  | 0.966754738 | - T2D risk | TSS200  |
| cg08117586 | PPFIBP1  | chr12 | 0.966765352 | + T2D risk | 5'UTR   |
| cg22135324 | NCOA7    | chr6  | 0.966851668 | + T2D risk | Body    |
| cg07695488 | FNIP2    | chr4  | 0.966983563 | + T2D risk | Body    |
| cg08592857 | TSC22D1  | chr13 | 0.967026799 | - T2D risk | 1stExon |
| cg08592857 | TSC22D1  | chr13 | 0.967026799 | - T2D risk | Body    |
| cg12279366 | ANK3     | chr10 | 0.967073365 | + T2D risk | Body    |
| cg25221496 | MEIS2    | chr15 | 0.967087335 | - T2D risk | Body    |
| cg17817168 | ST8SIA1  | chr12 | 0.967156104 | + T2D risk | Body    |
| cg19133023 | CHID1    | chr11 | 0.967245517 | + T2D risk | Body    |
| cg18084885 | SLIT3    | chr5  | 0.967338465 | - T2D risk | Body    |
| cg10984000 | DIP2C    | chr10 | 0.96741294  | - T2D risk | Body    |
| cg27657271 | CUX1     | chr7  | 0.967626456 | - T2D risk | TSS1500 |
| cg27657271 | CUX1     | chr7  | 0.967626456 | - T2D risk | Body    |
| cg14591979 | CADM1    | chr11 | 0.967644088 | + T2D risk | Body    |
| cg11476211 | PRKCE    | chr2  | 0.967728985 | - T2D risk | 1stExon |
| cg11215113 | SLIT3    | chr5  | 0.967742744 | + T2D risk | Body    |
| cg08554159 | PRKCE    | chr2  | 0.967793103 | - T2D risk | Body    |
| cg23821590 | ASH1L    | chr1  | 0.96787237  | + T2D risk | TSS1500 |
| cg06415900 | TENM2    | chr5  | 0.968068905 | + T2D risk | Body    |
| cg04850976 | CREBBP   | chr16 | 0.968110149 | - T2D risk | Body    |
| cg02404692 | CLEC16A  | chr16 | 0.968143992 | + T2D risk | Body    |
| cg15723805 | CRYL1    | chr13 | 0.968240181 | - T2D risk | Body    |
| cg12007634 | CLASP2   | chr3  | 0.968297184 | + T2D risk | Body    |
| cg12007634 | CLASP2   | chr3  | 0.968297184 | + T2D risk | TSS200  |
| cg04068159 | PCYT1A   | chr3  | 0.968449141 | + T2D risk | Body    |
| cg14071023 | CLIC5    | chr6  | 0.968469183 | - T2D risk | Body    |
| cg14826185 | TENM2    | chr5  | 0.968472917 | - T2D risk | Body    |
| cg23861644 | NUP98    | chr11 | 0.968558667 | + T2D risk | Body    |
| cg24732049 | CRYL1    | chr13 | 0.968588651 | - T2D risk | Body    |
| cg08955952 | SRPK2    | chr7  | 0.968755259 | + T2D risk | Body    |
| cg08832445 | CDH22    | chr20 | 0.968988998 | - T2D risk | 5'UTR   |
| cg15283292 | ANK3     | chr10 | 0.969025765 | - T2D risk | Body    |
| cg00623312 | CUX1     | chr7  | 0.969048457 | + T2D risk | Body    |



|            |          |       |             |            |         |
|------------|----------|-------|-------------|------------|---------|
| cg26821579 | SVIP     | chr11 | 0.969061159 | - T2D risk | TSS200  |
| cg19619064 | PTPRU    | chr1  | 0.969103675 | + T2D risk | TSS1500 |
| cg12386879 | COX6A1   | chr12 | 0.969124471 | - T2D risk | TSS200  |
| cg18656183 | ATP8A2   | chr13 | 0.969273163 | - T2D risk | Body    |
| cg14032033 | RGS7     | chr1  | 0.96928757  | - T2D risk | Body    |
| cg13900958 | DNAH9    | chr17 | 0.96939968  | + T2D risk | Body    |
| cg10464179 | RAP1GAP2 | chr17 | 0.969417223 | + T2D risk | 3'UTR   |
| cg02429393 | CNTROB   | chr17 | 0.969621818 | - T2D risk | TSS1500 |
| cg01460974 | ARHGEF9  | chrX  | 0.969623302 | + T2D risk | TSS1500 |
| cg02994018 | NDUFB3   | chr2  | 0.969687941 | - T2D risk | TSS1500 |
| cg03683866 | CLEC16A  | chr16 | 0.969721123 | + T2D risk | Body    |
| cg11546590 | PRKCB    | chr16 | 0.970073756 | + T2D risk | Body    |
| cg12316475 | APBA1    | chr9  | 0.970084892 | - T2D risk | TSS1500 |
| cg16609548 | DYNC1I2  | chr2  | 0.970113839 | - T2D risk | Body    |
| cg19954130 | CMTR1    | chr6  | 0.970213564 | - T2D risk | Body    |
| cg23807718 | JPH2     | chr20 | 0.970401254 | + T2D risk | Body    |
| cg02473287 | YWHAQ    | chr2  | 0.970435827 | + T2D risk | Body    |
| cg26843984 | KIAA1217 | chr10 | 0.970535306 | + T2D risk | TSS200  |
| cg26843984 | KIAA1217 | chr10 | 0.970535306 | + T2D risk | 5'UTR   |
| cg26843984 | KIAA1217 | chr10 | 0.970535306 | + T2D risk | Body    |
| cg27327627 | ROBO2    | chr3  | 0.970589681 | + T2D risk | 5'UTR   |
| cg27327627 | ROBO2    | chr3  | 0.970589681 | + T2D risk | Body    |
| cg26424794 | NUP98    | chr11 | 0.970601679 | + T2D risk | Body    |
| cg20733879 | SLC30A8  | chr8  | 0.970771676 | - T2D risk | 5'UTR   |
| cg20733879 | SLC30A8  | chr8  | 0.970771676 | - T2D risk | TSS1500 |
| cg03458839 | DIP2C    | chr10 | 0.970835251 | - T2D risk | Body    |
| cg22589504 | JPH2     | chr20 | 0.970839116 | + T2D risk | Body    |
| cg06628693 | PRKACB   | chr1  | 0.970930769 | - T2D risk | TSS1500 |
| cg13569779 | SLIT3    | chr5  | 0.971094793 | - T2D risk | Body    |
| cg08520895 | SPAG9    | chr17 | 0.971293048 | - T2D risk | Body    |
| cg20541601 | ANKHD1   | chr5  | 0.97149768  | + T2D risk | TSS1500 |
| cg25333386 | RHOQ     | chr2  | 0.971649784 | - T2D risk | Body    |
| cg06938954 | ANK2     | chr4  | 0.971665116 | - T2D risk | Body    |
| cg18394567 | RAP1GAP2 | chr17 | 0.971686784 | + T2D risk | Body    |
| cg26937360 | NUP98    | chr11 | 0.971692694 | - T2D risk | Body    |
| cg14342919 | ZHX2     | chr8  | 0.971751515 | + T2D risk | 5'UTR   |
| cg22148433 | TENM2    | chr5  | 0.971877199 | - T2D risk | Body    |
| cg12726300 | WDR47    | chr1  | 0.972029248 | + T2D risk | 5'UTR   |
| cg12726300 | WDR47    | chr1  | 0.972029248 | + T2D risk | 1stExon |
| cg08138574 | ATXN1    | chr6  | 0.972039049 | - T2D risk | 5'UTR   |
| cg24561600 | CADM1    | chr11 | 0.972068077 | - T2D risk | Body    |
| cg21545720 | PTP4A2   | chr1  | 0.972107087 | - T2D risk | TSS1500 |
| cg05566966 | KREMEN1  | chr22 | 0.972198503 | + T2D risk | Body    |
| cg10791984 | RAP1GAP2 | chr17 | 0.972261894 | + T2D risk | Body    |
| cg13051137 | PPFIBP1  | chr12 | 0.972310794 | - T2D risk | 5'UTR   |
| cg23881299 | GRK5     | chr10 | 0.972355497 | - T2D risk | Body    |
| cg13967190 | AGPAT3   | chr21 | 0.972370209 | + T2D risk | 5'UTR   |
| cg04524652 | FAM160A1 | chr4  | 0.972465609 | - T2D risk | TSS1500 |
| cg11408006 | PRKAG2   | chr7  | 0.972779    | + T2D risk | Body    |
| cg00548143 | ITPKB    | chr1  | 0.972875156 | + T2D risk | Body    |
| cg07366188 | BIRC5    | chr17 | 0.973216614 | - T2D risk | 3'UTR   |
| cg14638091 | SKAP1    | chr17 | 0.973338003 | + T2D risk | Body    |
| cg04182678 | NCOA2    | chr8  | 0.973442605 | + T2D risk | 5'UTR   |
| cg07500410 | CLOCK    | chr4  | 0.973556022 | + T2D risk | 5'UTR   |
| cg06173857 | GNA12    | chr7  | 0.973572889 | - T2D risk | Body    |
| cg06371996 | RAP1GAP2 | chr17 | 0.973631306 | + T2D risk | 3'UTR   |
| cg14398243 | PRKCE    | chr2  | 0.973684464 | + T2D risk | Body    |
| cg24185850 | PACS2    | chr14 | 0.973730768 | - T2D risk | Body    |
| cg01967792 | SH3GL2   | chr9  | 0.973792212 | - T2D risk | Body    |
| cg16028371 | KREMEN1  | chr22 | 0.973980461 | + T2D risk | TSS1500 |
| cg11651430 | UBL3     | chr13 | 0.974182092 | + T2D risk | TSS1500 |
| cg04179625 | RNF157   | chr17 | 0.974246009 | - T2D risk | 1stExon |
| cg06729676 | NF1      | chr17 | 0.974280613 | - T2D risk | TSS200  |
| cg13013297 | KREMEN1  | chr22 | 0.97429441  | + T2D risk | Body    |
| cg23065185 | LAMA4    | chr6  | 0.974412289 | + T2D risk | Body    |
| cg01113435 | SEMA3G   | chr3  | 0.974457495 | + T2D risk | TSS200  |
| cg13689742 | MYO6     | chr6  | 0.974511529 | - T2D risk | 5'UTR   |
| cg18551658 | ITGA1    | chr5  | 0.974520545 | + T2D risk | Body    |
| cg18551658 | ITGA1    | chr5  | 0.974520545 | + T2D risk | ExonBnd |
| cg19367047 | KDM4B    | chr19 | 0.974571043 | - T2D risk | Body    |



|              |          |       |             |            |         |
|--------------|----------|-------|-------------|------------|---------|
| cg04496204   | DACH1    | chr13 | 0.974725217 | - T2D risk | Body    |
| cg09916651   | CUX2     | chr12 | 0.975049981 | - T2D risk | Body    |
| cg03406913   | POC1B    | chr12 | 0.975472966 | + T2D risk | 5'UTR   |
| cg03406913   | POC1B    | chr12 | 0.975472966 | + T2D risk | Body    |
| cg03183451   | PRKCE    | chr2  | 0.975487549 | + T2D risk | Body    |
| cg08956303   | PHF21A   | chr11 | 0.975636576 | - T2D risk | Body    |
| cg08956303   | PHF21A   | chr11 | 0.975636576 | - T2D risk | ExonBnd |
| cg03604327   | EVI5     | chr1  | 0.975685562 | - T2D risk | Body    |
| cg26263145   | DIP2C    | chr10 | 0.975822542 | + T2D risk | Body    |
| cg23196625   | ADCY5    | chr3  | 0.975957381 | - T2D risk | Body    |
| cg27253035   | UXS1     | chr2  | 0.97598846  | - T2D risk | Body    |
| cg15709214   | CALD1    | chr7  | 0.976002912 | - T2D risk | TSS1500 |
| cg01837574   | CNTROB   | chr17 | 0.976023325 | - T2D risk | 1stExon |
| cg17198937   | CNTNAP2  | chr7  | 0.976025082 | + T2D risk | Body    |
| cg02024766   | NCOA2    | chr8  | 0.976111774 | - T2D risk | 5'UTR   |
| cg01352158   | AGPAT3   | chr21 | 0.976172673 | - T2D risk | 5'UTR   |
| cg10192074   | WWP2     | chr16 | 0.976239044 | + T2D risk | 3'UTR   |
| cg10266012   | ARHGAP32 | chr11 | 0.976347797 | - T2D risk | Body    |
| cg03502757   | GGPS1    | chr1  | 0.976416595 | + T2D risk | Body    |
| cg03502757   | GGPS1    | chr1  | 0.976416595 | + T2D risk | 5'UTR   |
| cg04720116   | DIP2C    | chr10 | 0.976538261 | + T2D risk | Body    |
| cg24812669   | PPP1R12A | chr12 | 0.976588156 | + T2D risk | TSS1500 |
| cg22807241   | CNTNAP2  | chr7  | 0.976591145 | + T2D risk | Body    |
| cg19076587   | PHF21A   | chr11 | 0.976677798 | + T2D risk | Body    |
| cg15144697   | NDUFB3   | chr2  | 0.976813981 | - T2D risk | TSS1500 |
| cg19910616   | ADCY5    | chr3  | 0.976898789 | - T2D risk | Body    |
| cg08442334   | RBM4     | chr11 | 0.97692321  | - T2D risk | Body    |
| cg13779845   | CADM1    | chr11 | 0.976965835 | - T2D risk | Body    |
| cg14530764   | ADCY5    | chr3  | 0.977041653 | + T2D risk | Body    |
| cg05080940   | CLEC16A  | chr16 | 0.977094004 | - T2D risk | Body    |
| cg20737451   | PACS1    | chr11 | 0.977169007 | - T2D risk | Body    |
| cg21243411   | RSF1     | chr11 | 0.977313507 | + T2D risk | Body    |
| cg20518045   | SPOCK1   | chr5  | 0.977383316 | + T2D risk | Body    |
| cg00685004   | SEC31A   | chr4  | 0.977462392 | - T2D risk | Body    |
| cg23325364   | DIP2C    | chr10 | 0.97747528  | - T2D risk | Body    |
| cg09889848   | DIP2C    | chr10 | 0.977577411 | - T2D risk | Body    |
| cg10449610   | TSHZ1    | chr18 | 0.977580126 | + T2D risk | 5'UTR   |
| cg10449610   | TSHZ1    | chr18 | 0.977580126 | + T2D risk | Body    |
| cg15001032   | DDC      | chr7  | 0.977593957 | + T2D risk | 1stExon |
| cg15001032   | DDC      | chr7  | 0.977593957 | + T2D risk | 5'UTR   |
| cg07389471   | ENAH     | chr1  | 0.977661547 | - T2D risk | Body    |
| cg04300150   | RNF217   | chr6  | 0.977879302 | + T2D risk | Body    |
| cg17423624   | PACRG    | chr6  | 0.977946406 | - T2D risk | Body    |
| cg27128549   | PRKCE    | chr2  | 0.97801491  | + T2D risk | Body    |
| cg23177406   | PHACTR1  | chr6  | 0.978112889 | + T2D risk | Body    |
| cg07912432   | APBA1    | chr9  | 0.978117409 | + T2D risk | 5'UTR   |
| cg09283025   | SRPK2    | chr7  | 0.978154556 | - T2D risk | Body    |
| cg15151784   | COX6A1   | chr12 | 0.978190833 | + T2D risk | Body    |
| cg22866998   | DIP2C    | chr10 | 0.978284572 | + T2D risk | Body    |
| cg00793946   | PRKCE    | chr2  | 0.978302319 | - T2D risk | Body    |
| cg25844276   | SLC7A2   | chr8  | 0.978335829 | + T2D risk | 5'UTR   |
| cg25844276   | SLC7A2   | chr8  | 0.978335829 | + T2D risk | Body    |
| ch.3.397026R | TBC1D5   | chr3  | 0.978339598 | + T2D risk | 5'UTR   |
| cg23710432   | TIMM23   | chr10 | 0.978519991 | - T2D risk | Body    |
| cg05306898   | SPAG9    | chr17 | 0.978767429 | + T2D risk | Body    |
| cg03452768   | SPAG9    | chr17 | 0.978771463 | - T2D risk | Body    |
| cg13144857   | PDE8A    | chr15 | 0.978802462 | + T2D risk | 5'UTR   |
| cg13144857   | PDE8A    | chr15 | 0.978802462 | + T2D risk | Body    |
| cg16081185   | NOL4     | chr18 | 0.978907157 | + T2D risk | 5'UTR   |
| cg16081185   | NOL4     | chr18 | 0.978907157 | + T2D risk | Body    |
| cg21753652   | PRKCE    | chr2  | 0.978913261 | - T2D risk | Body    |
| cg22647670   | RAP1GAP2 | chr17 | 0.979153171 | + T2D risk | Body    |
| cg07317705   | RANBP17  | chr5  | 0.979180952 | + T2D risk | Body    |
| cg17711217   | SLIT3    | chr5  | 0.979584191 | - T2D risk | Body    |
| cg02181555   | TAB2     | chr6  | 0.979675436 | + T2D risk | 5'UTR   |
| cg02181555   | TAB2     | chr6  | 0.979675436 | + T2D risk | Body    |
| cg03274197   | FLT1     | chr13 | 0.979972174 | - T2D risk | Body    |
| cg15533904   | NQO1     | chr16 | 0.979989623 | + T2D risk | Body    |
| cg13803071   | YWHAQ    | chr2  | 0.980007132 | - T2D risk | 5'UTR   |
| cg13803071   | YWHAQ    | chr2  | 0.980007132 | - T2D risk | 1stExon |



|            |                 |       |             |            |         |
|------------|-----------------|-------|-------------|------------|---------|
| cg24137770 | <i>PRKAG2</i>   | chr7  | 0.980285595 | + T2D risk | TSS1500 |
| cg00495363 | <i>MAST1</i>    | chr19 | 0.980381515 | + T2D risk | Body    |
| cg25283565 | <i>ATP6V1H</i>  | chr8  | 0.980382816 | + T2D risk | TSS1500 |
| cg15097617 | <i>CNTNAP2</i>  | chr7  | 0.980512772 | - T2D risk | Body    |
| cg00120481 | <i>CUX2</i>     | chr12 | 0.980521148 | + T2D risk | Body    |
| cg19076690 | <i>MGRN1</i>    | chr16 | 0.980578243 | - T2D risk | Body    |
| cg15748006 | <i>YWHAQ</i>    | chr2  | 0.980599957 | + T2D risk | TSS1500 |
| cg21038956 | <i>SLIT3</i>    | chr5  | 0.980727719 | - T2D risk | Body    |
| cg21553436 | <i>CLASP2</i>   | chr3  | 0.980868844 | + T2D risk | Body    |
| cg21553436 | <i>CLASP2</i>   | chr3  | 0.980868844 | + T2D risk | TSS1500 |
| cg21213332 | <i>AGPAT3</i>   | chr21 | 0.980923    | - T2D risk | 5'UTR   |
| cg23479189 | <i>PRKAG2</i>   | chr7  | 0.980925981 | + T2D risk | Body    |
| cg05865746 | <i>RAP1GAP2</i> | chr17 | 0.981200521 | - T2D risk | TSS200  |
| cg08167110 | <i>FAM160A1</i> | chr4  | 0.981613319 | - T2D risk | Body    |
| cg06484065 | <i>CADM1</i>    | chr11 | 0.98166079  | + T2D risk | Body    |
| cg10549467 | <i>CADM1</i>    | chr11 | 0.981801544 | + T2D risk | Body    |
| cg27063018 | <i>ITPKB</i>    | chr1  | 0.98182219  | - T2D risk | Body    |
| cg13721576 | <i>TENM2</i>    | chr5  | 0.981882422 | + T2D risk | Body    |
| cg05081346 | <i>RHBDD1</i>   | chr2  | 0.982036335 | + T2D risk | Body    |
| cg03114371 | <i>PPFIBP1</i>  | chr12 | 0.982277599 | + T2D risk | 5'UTR   |
| cg14722402 | <i>ST6GAL1</i>  | chr3  | 0.982281227 | - T2D risk | 5'UTR   |
| cg02184632 | <i>ZHX2</i>     | chr8  | 0.982282725 | - T2D risk | 3'UTR   |
| cg23859591 | <i>PPP1R12A</i> | chr12 | 0.982341019 | + T2D risk | TSS200  |
| cg23859591 | <i>PPP1R12A</i> | chr12 | 0.982341019 | + T2D risk | TSS1500 |
| cg04510330 | <i>CTR9</i>     | chr11 | 0.982362245 | - T2D risk | Body    |
| cg14431858 | <i>PACRG</i>    | chr6  | 0.982589726 | + T2D risk | Body    |
| cg11956748 | <i>RET</i>      | chr10 | 0.982615834 | - T2D risk | TSS200  |
| cg00057265 | <i>ANK3</i>     | chr10 | 0.982697002 | + T2D risk | Body    |
| cg18065623 | <i>TMEM150C</i> | chr4  | 0.982751447 | - T2D risk | Body    |
| cg05336149 | <i>DIP2C</i>    | chr10 | 0.982890241 | - T2D risk | Body    |
| cg11625184 | <i>TTC28</i>    | chr22 | 0.982900071 | - T2D risk | Body    |
| cg26119620 | <i>SLIT3</i>    | chr5  | 0.983058841 | + T2D risk | Body    |
| cg05364594 | <i>EFCAB14</i>  | chr1  | 0.983142241 | + T2D risk | Body    |
| cg23384786 | <i>IMPA1</i>    | chr8  | 0.983269181 | - T2D risk | TSS1500 |
| cg25691634 | <i>ST6GAL1</i>  | chr3  | 0.983276385 | + T2D risk | 5'UTR   |
| cg14050816 | <i>ANK2</i>     | chr4  | 0.983281074 | + T2D risk | Body    |
| cg23816184 | <i>EFCAB14</i>  | chr1  | 0.983333237 | + T2D risk | Body    |
| cg00747661 | <i>CREBBP</i>   | chr16 | 0.983362705 | - T2D risk | TSS1500 |
| cg21096774 | <i>TSGA10</i>   | chr2  | 0.983440047 | - T2D risk | Body    |
| cg10721492 | <i>ARL8B</i>    | chr3  | 0.983440853 | + T2D risk | TSS1500 |
| cg27436118 | <i>MGRN1</i>    | chr16 | 0.983598538 | + T2D risk | Body    |
| cg09568818 | <i>PDE3A</i>    | chr12 | 0.983609583 | - T2D risk | 3'UTR   |
| cg12061069 | <i>RAP1GAP2</i> | chr17 | 0.9836534   | - T2D risk | Body    |
| cg16208304 | <i>TSGA10</i>   | chr2  | 0.983680487 | + T2D risk | Body    |
| cg22049038 | <i>CNTNAP2</i>  | chr7  | 0.983778223 | - T2D risk | Body    |
| cg04954894 | <i>DDHD2</i>    | chr8  | 0.98381753  | + T2D risk | 5'UTR   |
| cg26111157 | <i>TTC28</i>    | chr22 | 0.983830378 | - T2D risk | TSS1500 |
| cg15352067 | <i>CUX1</i>     | chr7  | 0.983914235 | + T2D risk | Body    |
| cg11213990 | <i>SGSM2</i>    | chr17 | 0.984055182 | - T2D risk | Body    |
| cg13384396 | <i>ADCY5</i>    | chr3  | 0.984110646 | + T2D risk | TSS1500 |
| cg26768308 | <i>TSC22D1</i>  | chr13 | 0.984113193 | - T2D risk | TSS1500 |
| cg26768308 | <i>TSC22D1</i>  | chr13 | 0.984113193 | - T2D risk | Body    |
| cg04026789 | <i>CUX1</i>     | chr7  | 0.984199401 | - T2D risk | Body    |
| cg19257462 | <i>TMEM131</i>  | chr2  | 0.984459283 | + T2D risk | Body    |
| cg22031103 | <i>UXS1</i>     | chr2  | 0.984529894 | + T2D risk | 5'UTR   |
| cg22031103 | <i>UXS1</i>     | chr2  | 0.984529894 | + T2D risk | Body    |
| cg22031103 | <i>UXS1</i>     | chr2  | 0.984529894 | + T2D risk | 1stExon |
| cg06137439 | <i>GAD1</i>     | chr2  | 0.98460442  | - T2D risk | 5'UTR   |
| cg13748012 | <i>MAN1A2</i>   | chr1  | 0.984612845 | + T2D risk | Body    |
| cg10902667 | <i>PRKAG2</i>   | chr7  | 0.984662841 | - T2D risk | Body    |
| cg25675571 | <i>ATRN</i>     | chr20 | 0.984703491 | + T2D risk | 3'UTR   |
| cg10417176 | <i>MYO6</i>     | chr6  | 0.984743606 | + T2D risk | 5'UTR   |
| cg14157244 | <i>SSB</i>      | chr2  | 0.984824528 | + T2D risk | 1stExon |
| cg14157244 | <i>SSB</i>      | chr2  | 0.984824528 | + T2D risk | 5'UTR   |
| cg16411062 | <i>PDE5A</i>    | chr4  | 0.98483134  | + T2D risk | Body    |
| cg23396286 | <i>MMS19</i>    | chr10 | 0.984907895 | + T2D risk | TSS200  |
| cg16439003 | <i>WWP2</i>     | chr16 | 0.985051311 | + T2D risk | 3'UTR   |
| cg22468316 | <i>AGPAT3</i>   | chr21 | 0.985886048 | - T2D risk | 5'UTR   |
| cg22468316 | <i>AGPAT3</i>   | chr21 | 0.985886048 | - T2D risk | TSS1500 |
| cg07551060 | <i>GRK5</i>     | chr10 | 0.985890414 | - T2D risk | Body    |



|            |          |       |             |            |         |
|------------|----------|-------|-------------|------------|---------|
| cg05971751 | UBE2K    | chr4  | 0.985978119 | - T2D risk | TSS1500 |
| cg24516975 | CHID1    | chr11 | 0.986129352 | - T2D risk | TSS1500 |
| cg24516975 | CHID1    | chr11 | 0.986129352 | - T2D risk | 5'UTR   |
| cg13299986 | TAB2     | chr6  | 0.986144935 | - T2D risk | Body    |
| cg18364770 | SLIT3    | chr5  | 0.986267414 | - T2D risk | Body    |
| cg14351425 | GRK5     | chr10 | 0.986329917 | + T2D risk | Body    |
| cg25042430 | KIAA1217 | chr10 | 0.986342976 | + T2D risk | TSS1500 |
| cg21006167 | RANBP17  | chr5  | 0.986549315 | + T2D risk | Body    |
| cg16823244 | TJP1     | chr15 | 0.986866873 | + T2D risk | Body    |
| cg10280218 | TBC1D5   | chr3  | 0.987088709 | + T2D risk | Body    |
| cg14086746 | RHBDD1   | chr2  | 0.987177453 | + T2D risk | 5'UTR   |
| cg03353047 | KIAA1217 | chr10 | 0.987321113 | + T2D risk | 5'UTR   |
| cg02631767 | PDE3A    | chr12 | 0.987346938 | + T2D risk | Body    |
| cg09023643 | ST6GAL1  | chr3  | 0.987485066 | + T2D risk | TSS1500 |
| cg01363710 | CLIC5    | chr6  | 0.98749508  | - T2D risk | Body    |
| cg07569575 | SLIT3    | chr5  | 0.987576064 | - T2D risk | Body    |
| cg02699167 | FBXL2    | chr3  | 0.987661712 | - T2D risk | Body    |
| cg23009067 | GNA12    | chr7  | 0.987723732 | + T2D risk | Body    |
| cg06937357 | PACS2    | chr14 | 0.987852252 | - T2D risk | Body    |
| cg19335436 | DIP2C    | chr10 | 0.987891546 | - T2D risk | Body    |
| cg04022063 | TJP1     | chr15 | 0.988043599 | + T2D risk | 1stExon |
| cg04022063 | TJP1     | chr15 | 0.988043599 | + T2D risk | 5'UTR   |
| cg05025391 | ATXN1    | chr6  | 0.988117207 | - T2D risk | 5'UTR   |
| cg08151809 | PRKAG2   | chr7  | 0.98821587  | - T2D risk | Body    |
| cg10399824 | GRK5     | chr10 | 0.988374598 | + T2D risk | Body    |
| cg10312572 | CPLX2    | chr5  | 0.988374776 | - T2D risk | 5'UTR   |
| cg21238928 | PRKACB   | chr1  | 0.98853338  | + T2D risk | TSS1500 |
| cg26474881 | RAP1GAP2 | chr17 | 0.988553601 | - T2D risk | Body    |
| cg08074962 | SEC31A   | chr4  | 0.988607453 | + T2D risk | TSS1500 |
| cg09903303 | PDE5A    | chr4  | 0.988733589 | + T2D risk | Body    |
| cg02801993 | KDM4B    | chr19 | 0.988816122 | - T2D risk | Body    |
| cg02453827 | YWHAQ    | chr2  | 0.988965912 | - T2D risk | TSS1500 |
| cg11929598 | PPFIBP1  | chr12 | 0.989005663 | + T2D risk | 5'UTR   |
| cg25138017 | FARSB    | chr2  | 0.989165551 | - T2D risk | Body    |
| cg21668653 | RAP1GAP2 | chr17 | 0.989203296 | + T2D risk | Body    |
| cg22652747 | MEIS2    | chr15 | 0.989533191 | - T2D risk | Body    |
| cg00681288 | TMEM131  | chr2  | 0.989593182 | - T2D risk | Body    |
| cg09904358 | KIAA1217 | chr10 | 0.989712237 | - T2D risk | 5'UTR   |
| cg03860108 | CNTNAP2  | chr7  | 0.989779614 | + T2D risk | Body    |
| cg15555053 | POC1B    | chr12 | 0.989807229 | + T2D risk | Body    |
| cg15555053 | POC1B    | chr12 | 0.989807229 | + T2D risk | 5'UTR   |
| cg27441881 | SKAP1    | chr17 | 0.989832127 | - T2D risk | Body    |
| cg13556554 | ARPP19   | chr15 | 0.989850205 | - T2D risk | Body    |
| cg01618530 | ATP6V1H  | chr8  | 0.989972881 | + T2D risk | TSS200  |
| cg01618530 | ATP6V1H  | chr8  | 0.989972881 | + T2D risk | TSS1500 |
| cg14063129 | PACS2    | chr14 | 0.990035915 | - T2D risk | Body    |
| cg21212066 | GLG1     | chr16 | 0.99019911  | - T2D risk | Body    |
| cg21212066 | GLG1     | chr16 | 0.99019911  | - T2D risk | 1stExon |
| cg17847520 | CPLX2    | chr5  | 0.990287741 | + T2D risk | TSS200  |
| cg12325691 | MET      | chr7  | 0.990289087 | - T2D risk | Body    |
| cg25981623 | OXSM     | chr3  | 0.990299146 | - T2D risk | Body    |
| cg25981623 | NGLY1    | chr3  | 0.990299146 | - T2D risk | TSS200  |
| cg25981623 | OXSM     | chr3  | 0.990299146 | - T2D risk | 5'UTR   |
| cg10329468 | CDH22    | chr20 | 0.990301669 | + T2D risk | 3'UTR   |
| cg20915973 | ATP8A1   | chr4  | 0.990311308 | - T2D risk | TSS1500 |
| cg00601726 | ERC2     | chr3  | 0.990364483 | - T2D risk | Body    |
| cg03666597 | CUX1     | chr7  | 0.990370532 | + T2D risk | Body    |
| cg14438755 | SSBP2    | chr5  | 0.990484033 | - T2D risk | Body    |
| cg23114819 | CLIC5    | chr6  | 0.990559225 | - T2D risk | Body    |
| cg09282828 | LMX1B    | chr9  | 0.990667344 | - T2D risk | Body    |
| cg07166291 | KCNIP3   | chr2  | 0.99067199  | + T2D risk | Body    |
| cg03848856 | WWP2     | chr16 | 0.990742668 | - T2D risk | Body    |
| cg17296483 | WIZ      | chr19 | 0.990849656 | - T2D risk | TSS1500 |
| cg03324501 | PRKCE    | chr2  | 0.990931543 | + T2D risk | Body    |
| cg11328572 | EVI5     | chr1  | 0.991442663 | + T2D risk | Body    |
| cg20211604 | DNAH9    | chr17 | 0.991474954 | + T2D risk | Body    |
| cg16807273 | RAP1GAP2 | chr17 | 0.991495553 | + T2D risk | Body    |
| cg02792136 | DIP2C    | chr10 | 0.991922562 | - T2D risk | Body    |
| cg09800430 | ITPKB    | chr1  | 0.992079633 | + T2D risk | Body    |
| cg03550765 | SEMA3G   | chr3  | 0.992143676 | - T2D risk | Body    |



|            |          |       |             |            |         |
|------------|----------|-------|-------------|------------|---------|
| cg22238977 | ANK3     | chr10 | 0.992523892 | - T2D risk | 3'UTR   |
| cg00998686 | CLASP2   | chr3  | 0.992526977 | - T2D risk | Body    |
| cg27185466 | ASH1L    | chr1  | 0.992538539 | + T2D risk | Body    |
| cg04077441 | AGPAT3   | chr21 | 0.992568873 | - T2D risk | 5'UTR   |
| cg06890317 | CHID1    | chr11 | 0.992669471 | - T2D risk | ExonBnd |
| cg06890317 | CHID1    | chr11 | 0.992669471 | - T2D risk | Body    |
| cg07779051 | CLEC16A  | chr16 | 0.992850177 | - T2D risk | Body    |
| cg19309855 | CNTROB   | chr17 | 0.992855456 | + T2D risk | TSS1500 |
| cg19413725 | FAM160A1 | chr4  | 0.992887971 | + T2D risk | 5'UTR   |
| cg00066627 | SCGN     | chr6  | 0.992902014 | - T2D risk | Body    |
| cg07358015 | HMBOX1   | chr8  | 0.992922735 | + T2D risk | 5'UTR   |
| cg07358015 | HMBOX1   | chr8  | 0.992922735 | + T2D risk | TSS200  |
| cg12518799 | RNF157   | chr17 | 0.992933577 | + T2D risk | Body    |
| cg00807464 | CUX2     | chr12 | 0.993117251 | - T2D risk | Body    |
| cg05313656 | CDH22    | chr20 | 0.993201359 | + T2D risk | 5'UTR   |
| cg01399353 | ATRNL1   | chr10 | 0.993271659 | + T2D risk | Body    |
| cg04818078 | CREBBP   | chr16 | 0.993283318 | - T2D risk | Body    |
| cg17066338 | ANKHD1   | chr5  | 0.993609972 | - T2D risk | Body    |
| cg23545098 | CREBBP   | chr16 | 0.993613355 | + T2D risk | TSS1500 |
| cg04077168 | SPAG9    | chr17 | 0.993735977 | - T2D risk | Body    |
| cg08833604 | TAB2     | chr6  | 0.993810583 | - T2D risk | Body    |
| cg10566764 | KCNIP3   | chr2  | 0.993883674 | - T2D risk | Body    |
| cg00297969 | AGPAT3   | chr21 | 0.994088047 | + T2D risk | 5'UTR   |
| cg03998546 | DENND4C  | chr9  | 0.994105572 | - T2D risk | TSS1500 |
| cg08960498 | PHACTR1  | chr6  | 0.994106102 | - T2D risk | Body    |
| cg18115693 | KDM4B    | chr19 | 0.99414769  | + T2D risk | TSS1500 |
| cg22181049 | CADM1    | chr11 | 0.994148166 | - T2D risk | Body    |
| cg20830360 | DIP2C    | chr10 | 0.994240403 | - T2D risk | Body    |
| cg21806387 | KIAA1217 | chr10 | 0.994262643 | + T2D risk | 5'UTR   |
| cg16225517 | NPEPPS   | chr17 | 0.994435517 | + T2D risk | Body    |
| cg01217514 | CHFR     | chr12 | 0.994570876 | - T2D risk | Body    |
| cg24537104 | PRKCE    | chr2  | 0.994653617 | + T2D risk | Body    |
| cg15484628 | MGRN1    | chr16 | 0.994691278 | + T2D risk | Body    |
| cg14832990 | TSHZ1    | chr18 | 0.994693731 | + T2D risk | 5'UTR   |
| cg19784244 | TMEM59   | chr1  | 0.994796406 | + T2D risk | 5'UTR   |
| cg19784244 | TMEM59   | chr1  | 0.994796406 | + T2D risk | 1stExon |
| cg02856379 | MAN1A1   | chr6  | 0.994838144 | - T2D risk | Body    |
| cg17231494 | CALD1    | chr7  | 0.994928955 | - T2D risk | Body    |
| cg14671809 | ERC2     | chr3  | 0.994983054 | - T2D risk | 3'UTR   |
| cg01081400 | LCA5     | chr6  | 0.99503355  | - T2D risk | 3'UTR   |
| cg12270449 | PPFIBP1  | chr12 | 0.995124805 | + T2D risk | Body    |
| cg12270449 | PPFIBP1  | chr12 | 0.995124805 | + T2D risk | ExonBnd |
| cg11579447 | GALK2    | chr15 | 0.995151153 | + T2D risk | Body    |
| cg09980403 | MAST1    | chr19 | 0.995262017 | - T2D risk | Body    |
| cg10486834 | CUX1     | chr7  | 0.995346978 | - T2D risk | Body    |
| cg02733424 | AGPAT3   | chr21 | 0.995363664 | + T2D risk | Body    |
| cg24000108 | CLOCK    | chr4  | 0.995428038 | - T2D risk | 5'UTR   |
| cg12241755 | DACH1    | chr13 | 0.995430475 | + T2D risk | Body    |
| cg23986445 | RSF1     | chr11 | 0.995772875 | + T2D risk | Body    |
| cg17215325 | CLASP2   | chr3  | 0.995878966 | - T2D risk | Body    |
| cg07199337 | PRMT3    | chr11 | 0.995981557 | + T2D risk | TSS1500 |
| cg00372529 | SLC9A6   | chrX  | 0.996075407 | - T2D risk | TSS1500 |
| cg02995459 | NOL4     | chr18 | 0.996171468 | - T2D risk | 5'UTR   |
| cg02995459 | NOL4     | chr18 | 0.996171468 | - T2D risk | Body    |
| cg08530041 | SLIT3    | chr5  | 0.99618178  | + T2D risk | 3'UTR   |
| cg13471336 | DIP2C    | chr10 | 0.996206033 | - T2D risk | Body    |
| cg23799943 | CUX2     | chr12 | 0.996240698 | + T2D risk | Body    |
| cg16893968 | DYNC1I2  | chr2  | 0.996249376 | - T2D risk | Body    |
| cg03490965 | TENM2    | chr5  | 0.99627816  | - T2D risk | Body    |
| cg00650925 | ITPKB    | chr1  | 0.996444378 | + T2D risk | Body    |
| cg21822822 | LAMA4    | chr6  | 0.99646993  | - T2D risk | Body    |
| cg03050708 | MMS19    | chr10 | 0.996489608 | - T2D risk | TSS1500 |
| cg05835969 | DIP2C    | chr10 | 0.996568927 | + T2D risk | Body    |
| cg22010478 | KDM4B    | chr19 | 0.996593464 | + T2D risk | 5'UTR   |
| cg22869706 | DIP2C    | chr10 | 0.996801612 | - T2D risk | Body    |
| cg04878697 | PPFIBP1  | chr12 | 0.996936472 | - T2D risk | 5'UTR   |
| cg05826175 | CLOCK    | chr4  | 0.996955593 | - T2D risk | Body    |
| cg16871029 | GLG1     | chr16 | 0.996956559 | + T2D risk | Body    |
| cg18706511 | RCAN2    | chr6  | 0.996974211 | - T2D risk | Body    |
| cg11305100 | PHF21A   | chr11 | 0.99700162  | + T2D risk | Body    |



|            |                 |       |             |            |         |
|------------|-----------------|-------|-------------|------------|---------|
| cg13338595 | <i>PTPRU</i>    | chr1  | 0.997081008 | + T2D risk | TSS1500 |
| cg25357706 | <i>ADCY5</i>    | chr3  | 0.997114727 | - T2D risk | Body    |
| cg17268775 | <i>CHFR</i>     | chr12 | 0.997204388 | + T2D risk | Body    |
| cg00531748 | <i>KDR</i>      | chr4  | 0.997224908 | - T2D risk | TSS1500 |
| cg14696064 | <i>ADCY5</i>    | chr3  | 0.997229788 | - T2D risk | Body    |
| cg23681599 | <i>DIP2C</i>    | chr10 | 0.997255279 | - T2D risk | Body    |
| cg09279412 | <i>CUX1</i>     | chr7  | 0.99727347  | + T2D risk | TSS200  |
| cg18612612 | <i>CALD1</i>    | chr7  | 0.997278695 | - T2D risk | 5'UTR   |
| cg19769780 | <i>ITPKB</i>    | chr1  | 0.99730738  | + T2D risk | Body    |
| cg13767920 | <i>RAP1GAP2</i> | chr17 | 0.997332919 | + T2D risk | Body    |
| cg04272368 | <i>CUL1</i>     | chr7  | 0.997403468 | - T2D risk | 5'UTR   |
| cg08327378 | <i>WWP2</i>     | chr16 | 0.997567936 | + T2D risk | 5'UTR   |
| cg20684696 | <i>DIP2C</i>    | chr10 | 0.997583123 | + T2D risk | Body    |
| cg27122688 | <i>NCOA7</i>    | chr6  | 0.997655237 | - T2D risk | 5'UTR   |
| cg27122688 | <i>NCOA7</i>    | chr6  | 0.997655237 | - T2D risk | Body    |
| cg25724842 | <i>PACRG</i>    | chr6  | 0.997855897 | - T2D risk | Body    |
| cg26595364 | <i>RET</i>      | chr10 | 0.998117445 | - T2D risk | Body    |
| cg07885635 | <i>ATXN1</i>    | chr6  | 0.998201242 | + T2D risk | 5'UTR   |
| cg03313290 | <i>ARL15</i>    | chr5  | 0.998231219 | + T2D risk | Body    |
| cg11683648 | <i>COL4A1</i>   | chr13 | 0.998307134 | - T2D risk | Body    |
| cg09063434 | <i>DIP2C</i>    | chr10 | 0.998337466 | - T2D risk | Body    |
| cg10382692 | <i>PDE5A</i>    | chr4  | 0.998541848 | - T2D risk | TSS1500 |
| cg03894557 | <i>ARPP19</i>   | chr15 | 0.998573799 | + T2D risk | Body    |
| cg11854691 | <i>ARL15</i>    | chr5  | 0.998573985 | + T2D risk | Body    |
| cg26026297 | <i>ATP8A1</i>   | chr4  | 0.998674237 | - T2D risk | Body    |
| cg13401235 | <i>PHACTR1</i>  | chr6  | 0.998724702 | - T2D risk | Body    |
| cg14878913 | <i>BCAT1</i>    | chr12 | 0.998910931 | - T2D risk | Body    |
| cg01298374 | <i>PPFIBP1</i>  | chr12 | 0.998930297 | - T2D risk | 5'UTR   |
| cg19070636 | <i>NCOA7</i>    | chr6  | 0.998942533 | + T2D risk | Body    |
| cg19070636 | <i>NCOA7</i>    | chr6  | 0.998942533 | + T2D risk | TSS1500 |
| cg20971014 | <i>SPPL2A</i>   | chr15 | 0.999275603 | + T2D risk | 1stExon |
| cg20971014 | <i>SPPL2A</i>   | chr15 | 0.999275603 | + T2D risk | 5'UTR   |
| cg03333101 | <i>MAST1</i>    | chr19 | 0.999349465 | - T2D risk | Body    |
| cg17343444 | <i>TENM2</i>    | chr5  | 0.999407565 | + T2D risk | Body    |
| cg13435304 | <i>ULK4</i>     | chr3  | 0.999460314 | + T2D risk | Body    |
| cg23653242 | <i>PCYT1A</i>   | chr3  | 0.999546544 | + T2D risk | Body    |
| cg08805345 | <i>PRKAG2</i>   | chr7  | 0.999603106 | - T2D risk | Body    |



**Supplementary Table S14:** DNA methylation differences in pancreatic islets of diabetic donors in 15 diabetic and 34 non-diabetic donors, re-analysed methylation data from publication of Dayeh et al., 2016. Methylation data was considered for 236 genes identified in Figure 6.

[illegible]
